# Supplementary material for: Identification and Replication of Loci Involved in Camptothecin-Induced Cytotoxicity Using CEPH Pedigrees
Source: PubMed Central journal article supplement (PMC3088663; doi:10.1371/journal.pone.0017561), 2011-05-05

# Drug 9AC, dose 0.01 (mM)

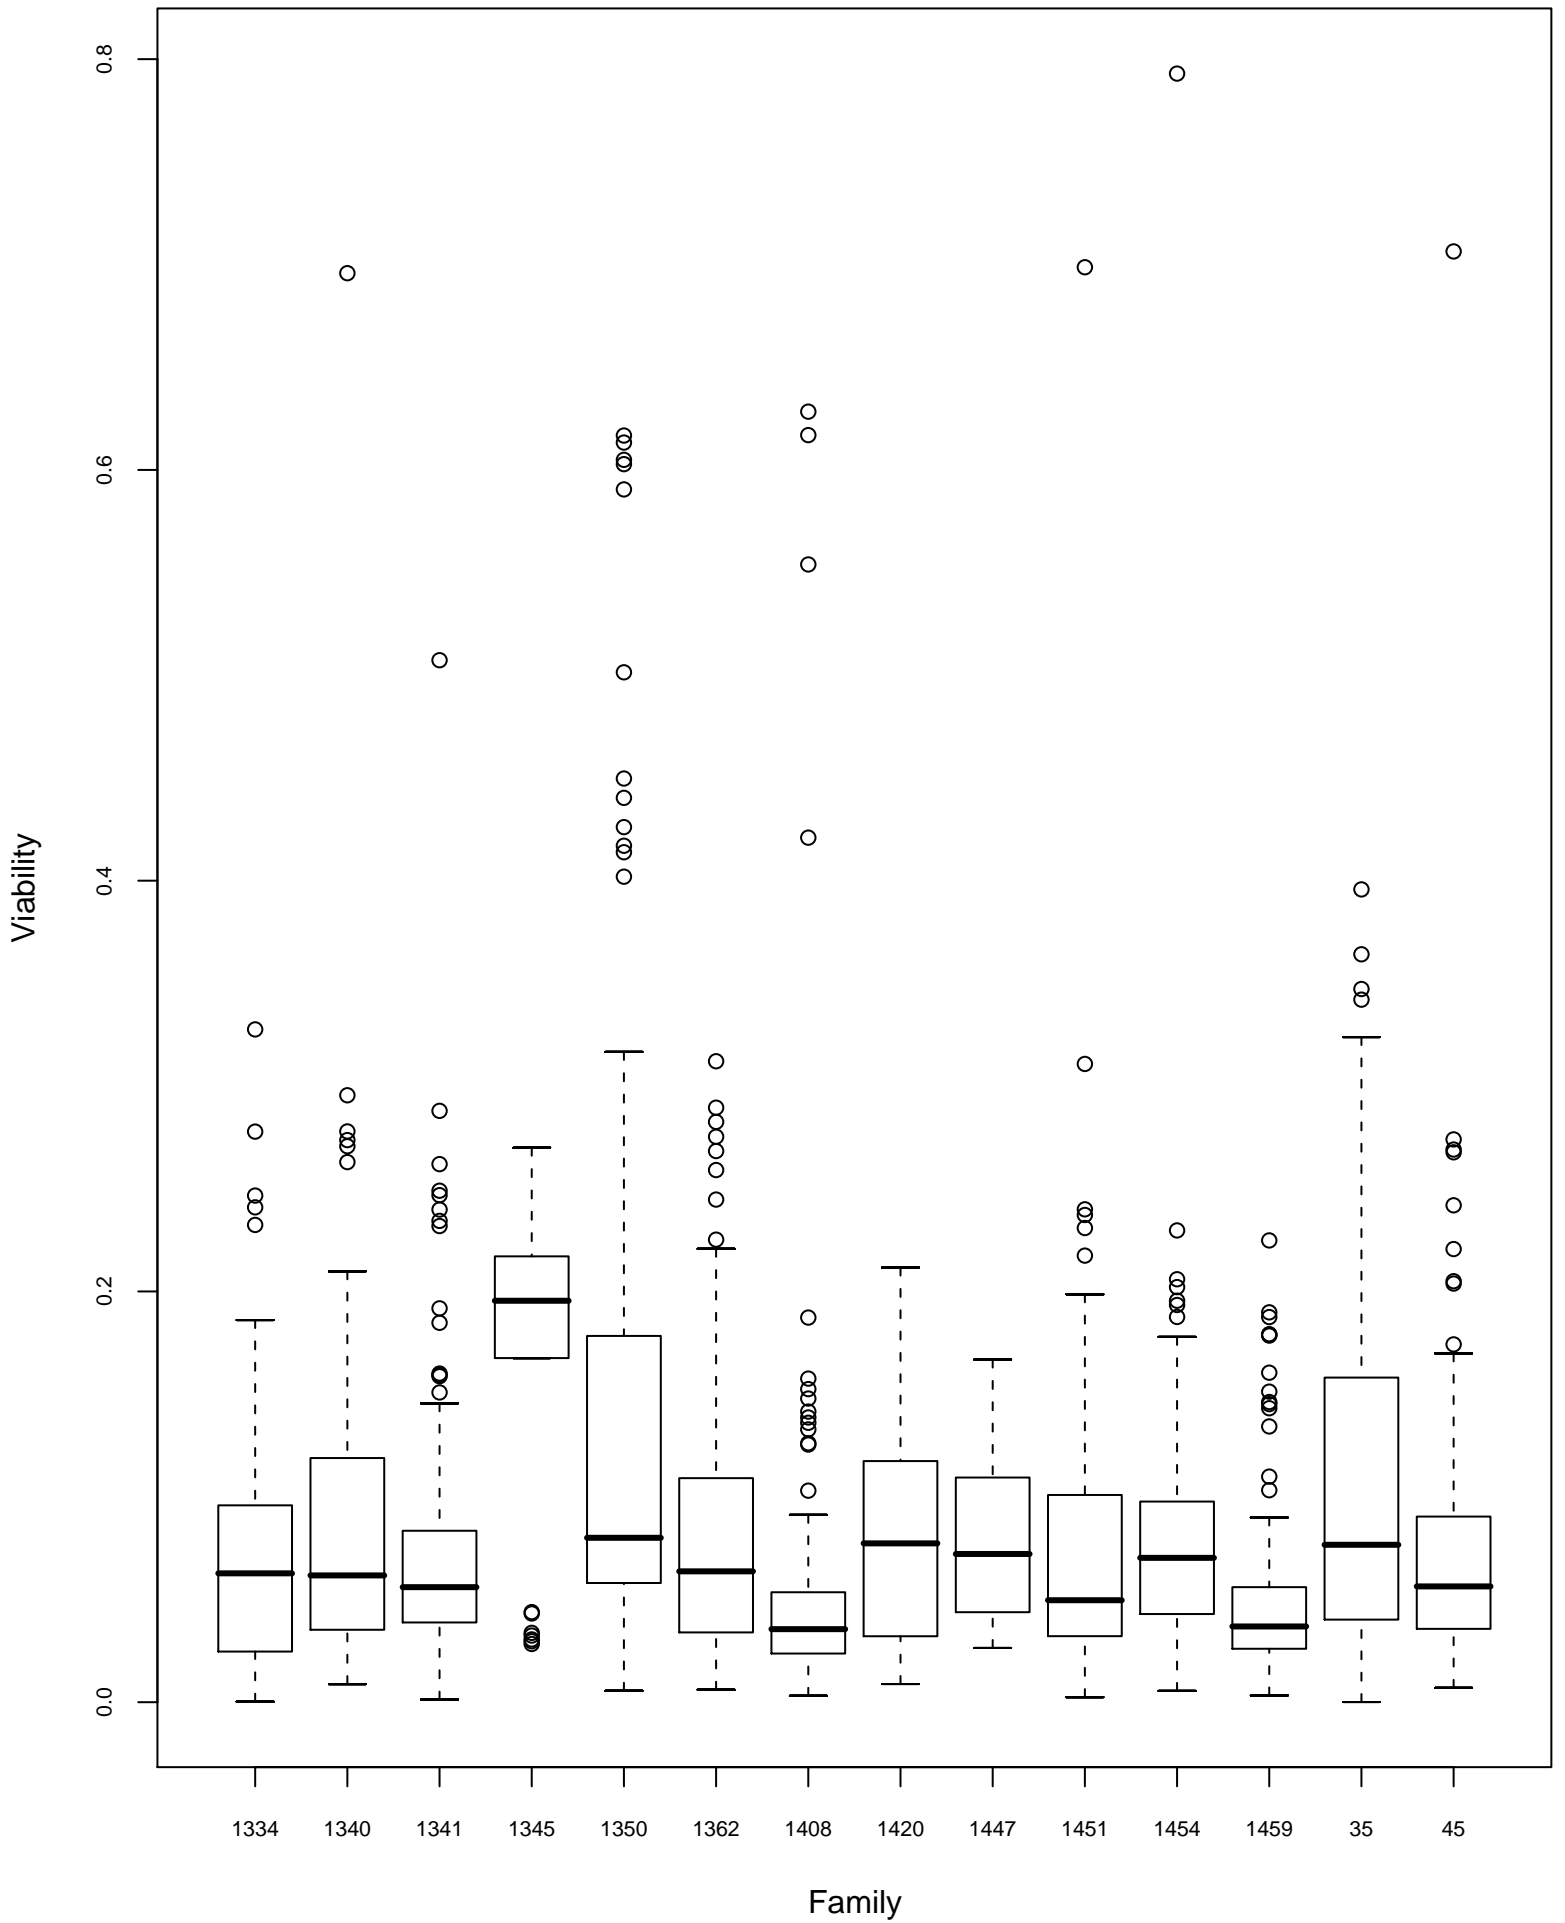

# Drug 9AC, dose 0.002 (mM)

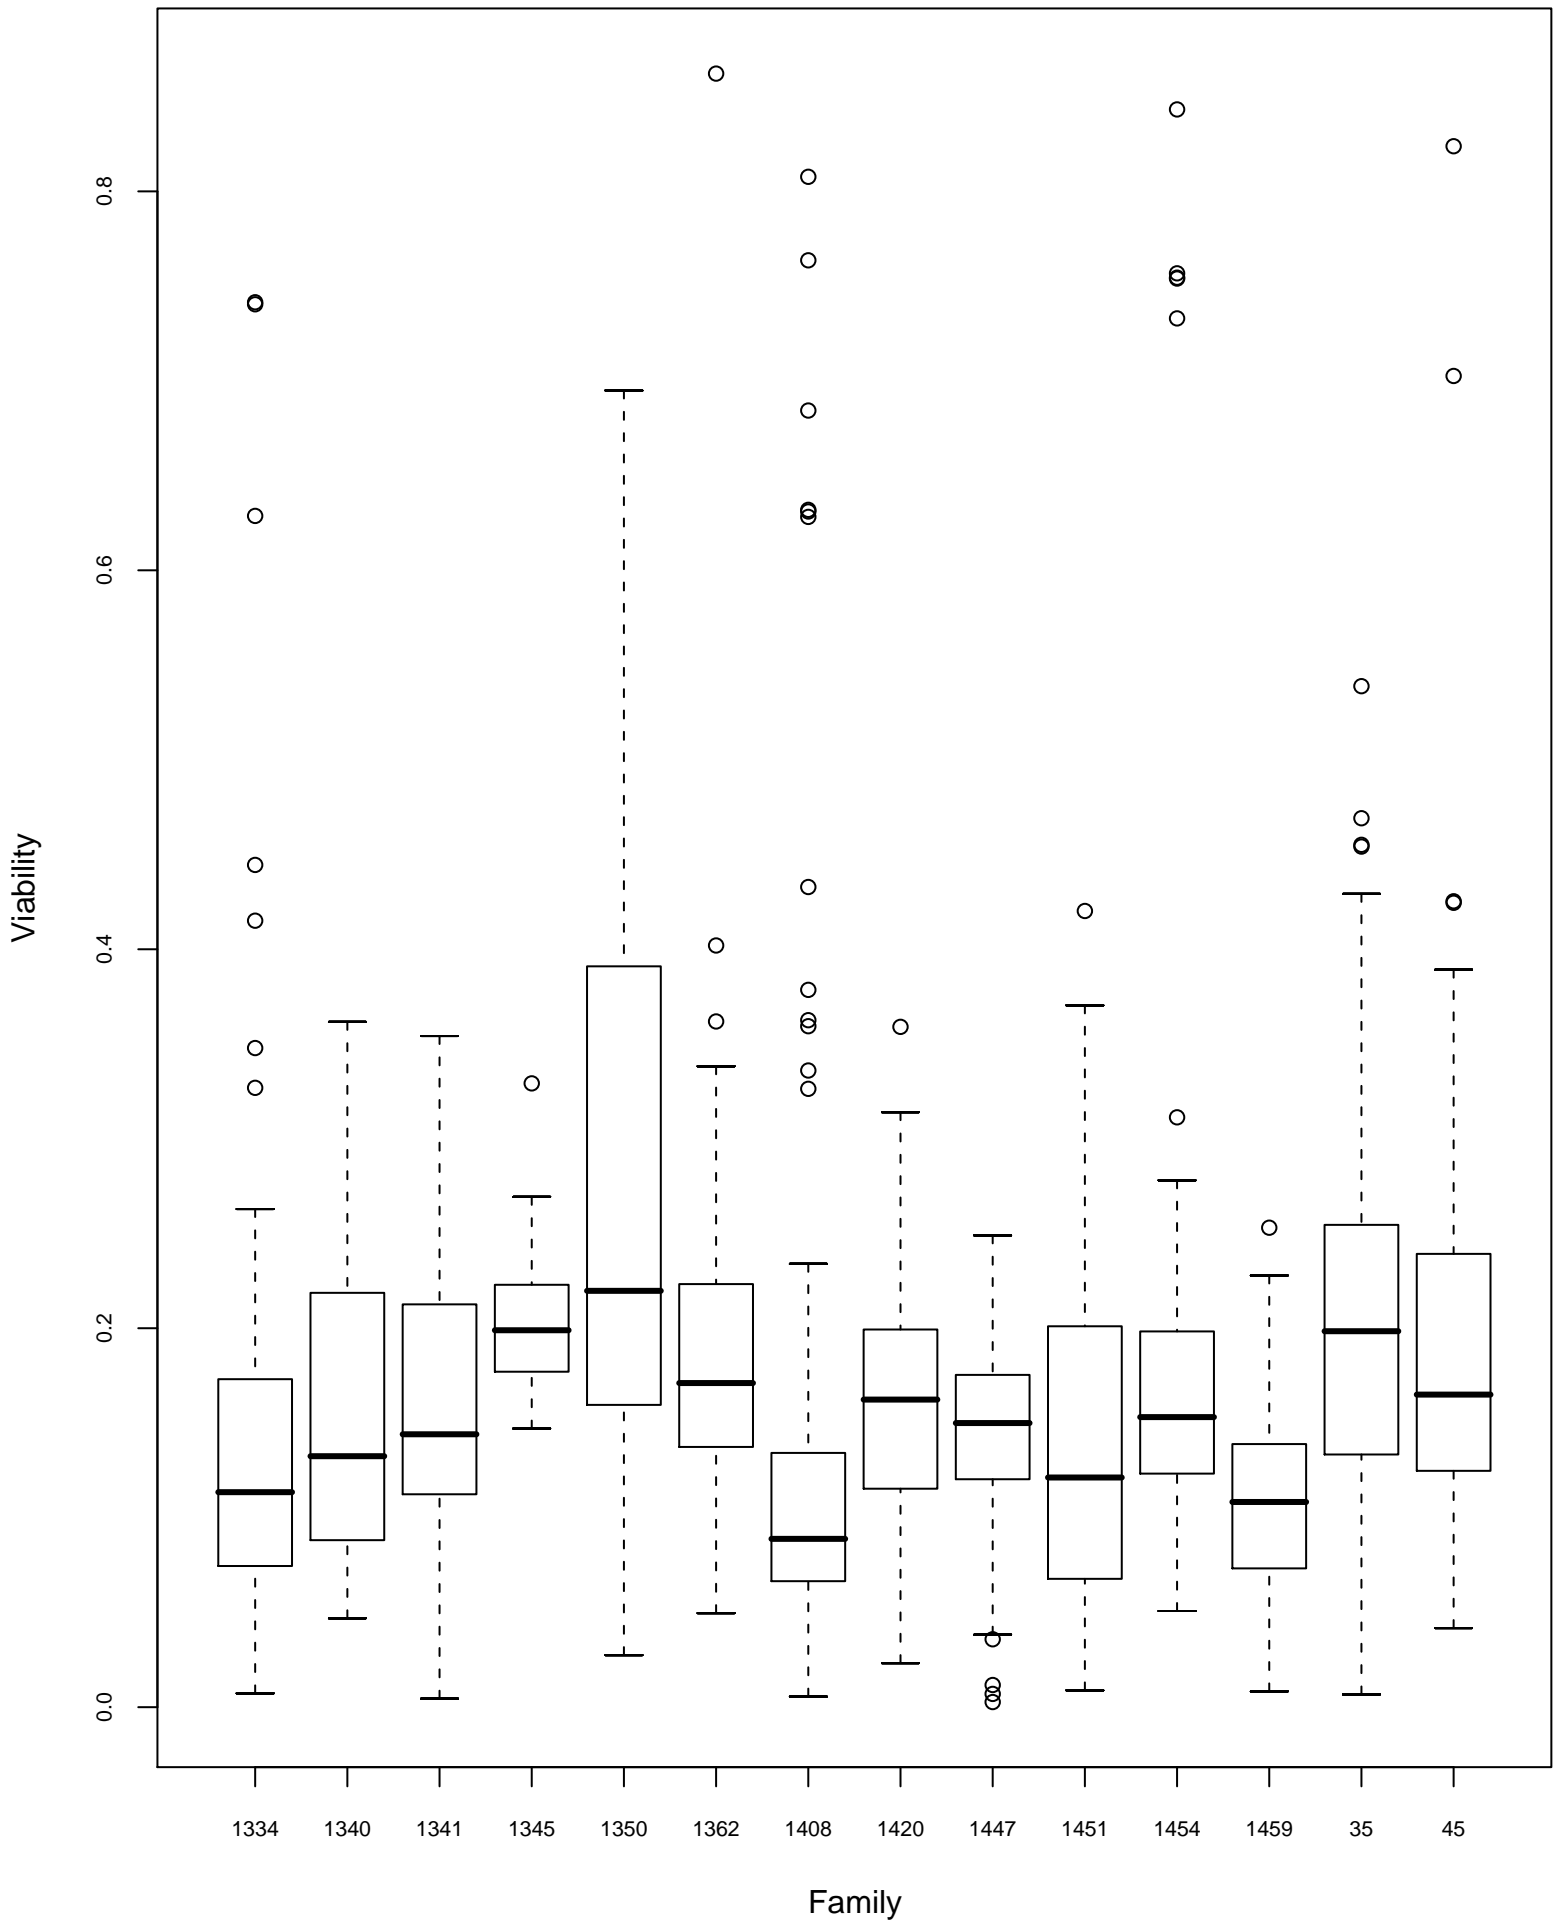

# Drug 9AC, dose 8e-05 (mM)

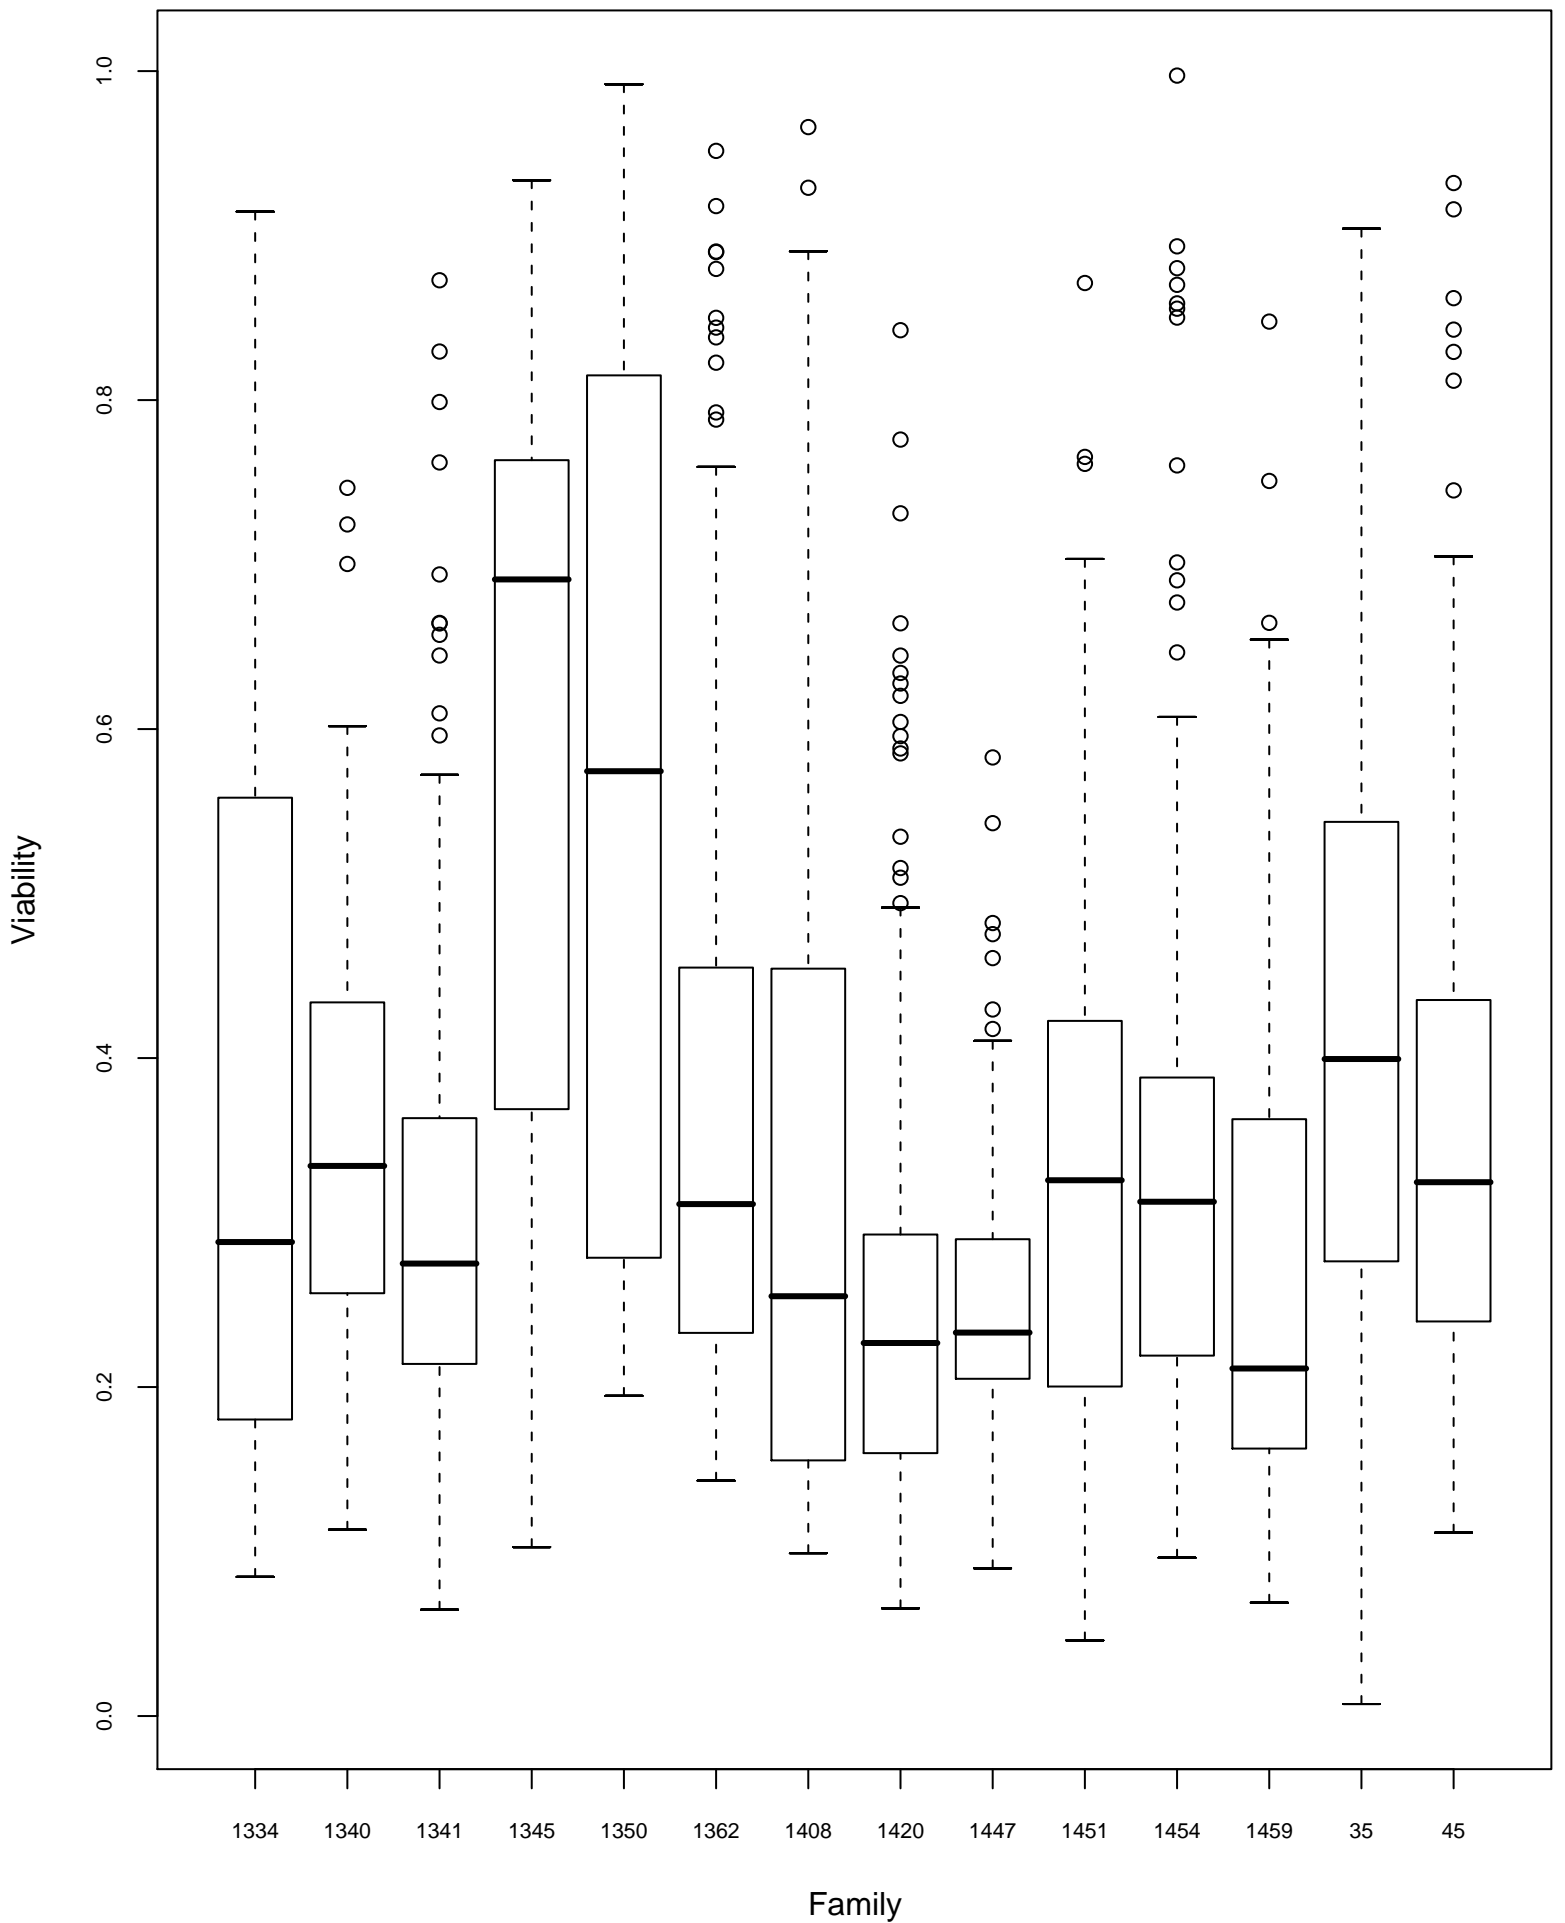

# Drug 9AC, dose 1.6e-05 (mM)

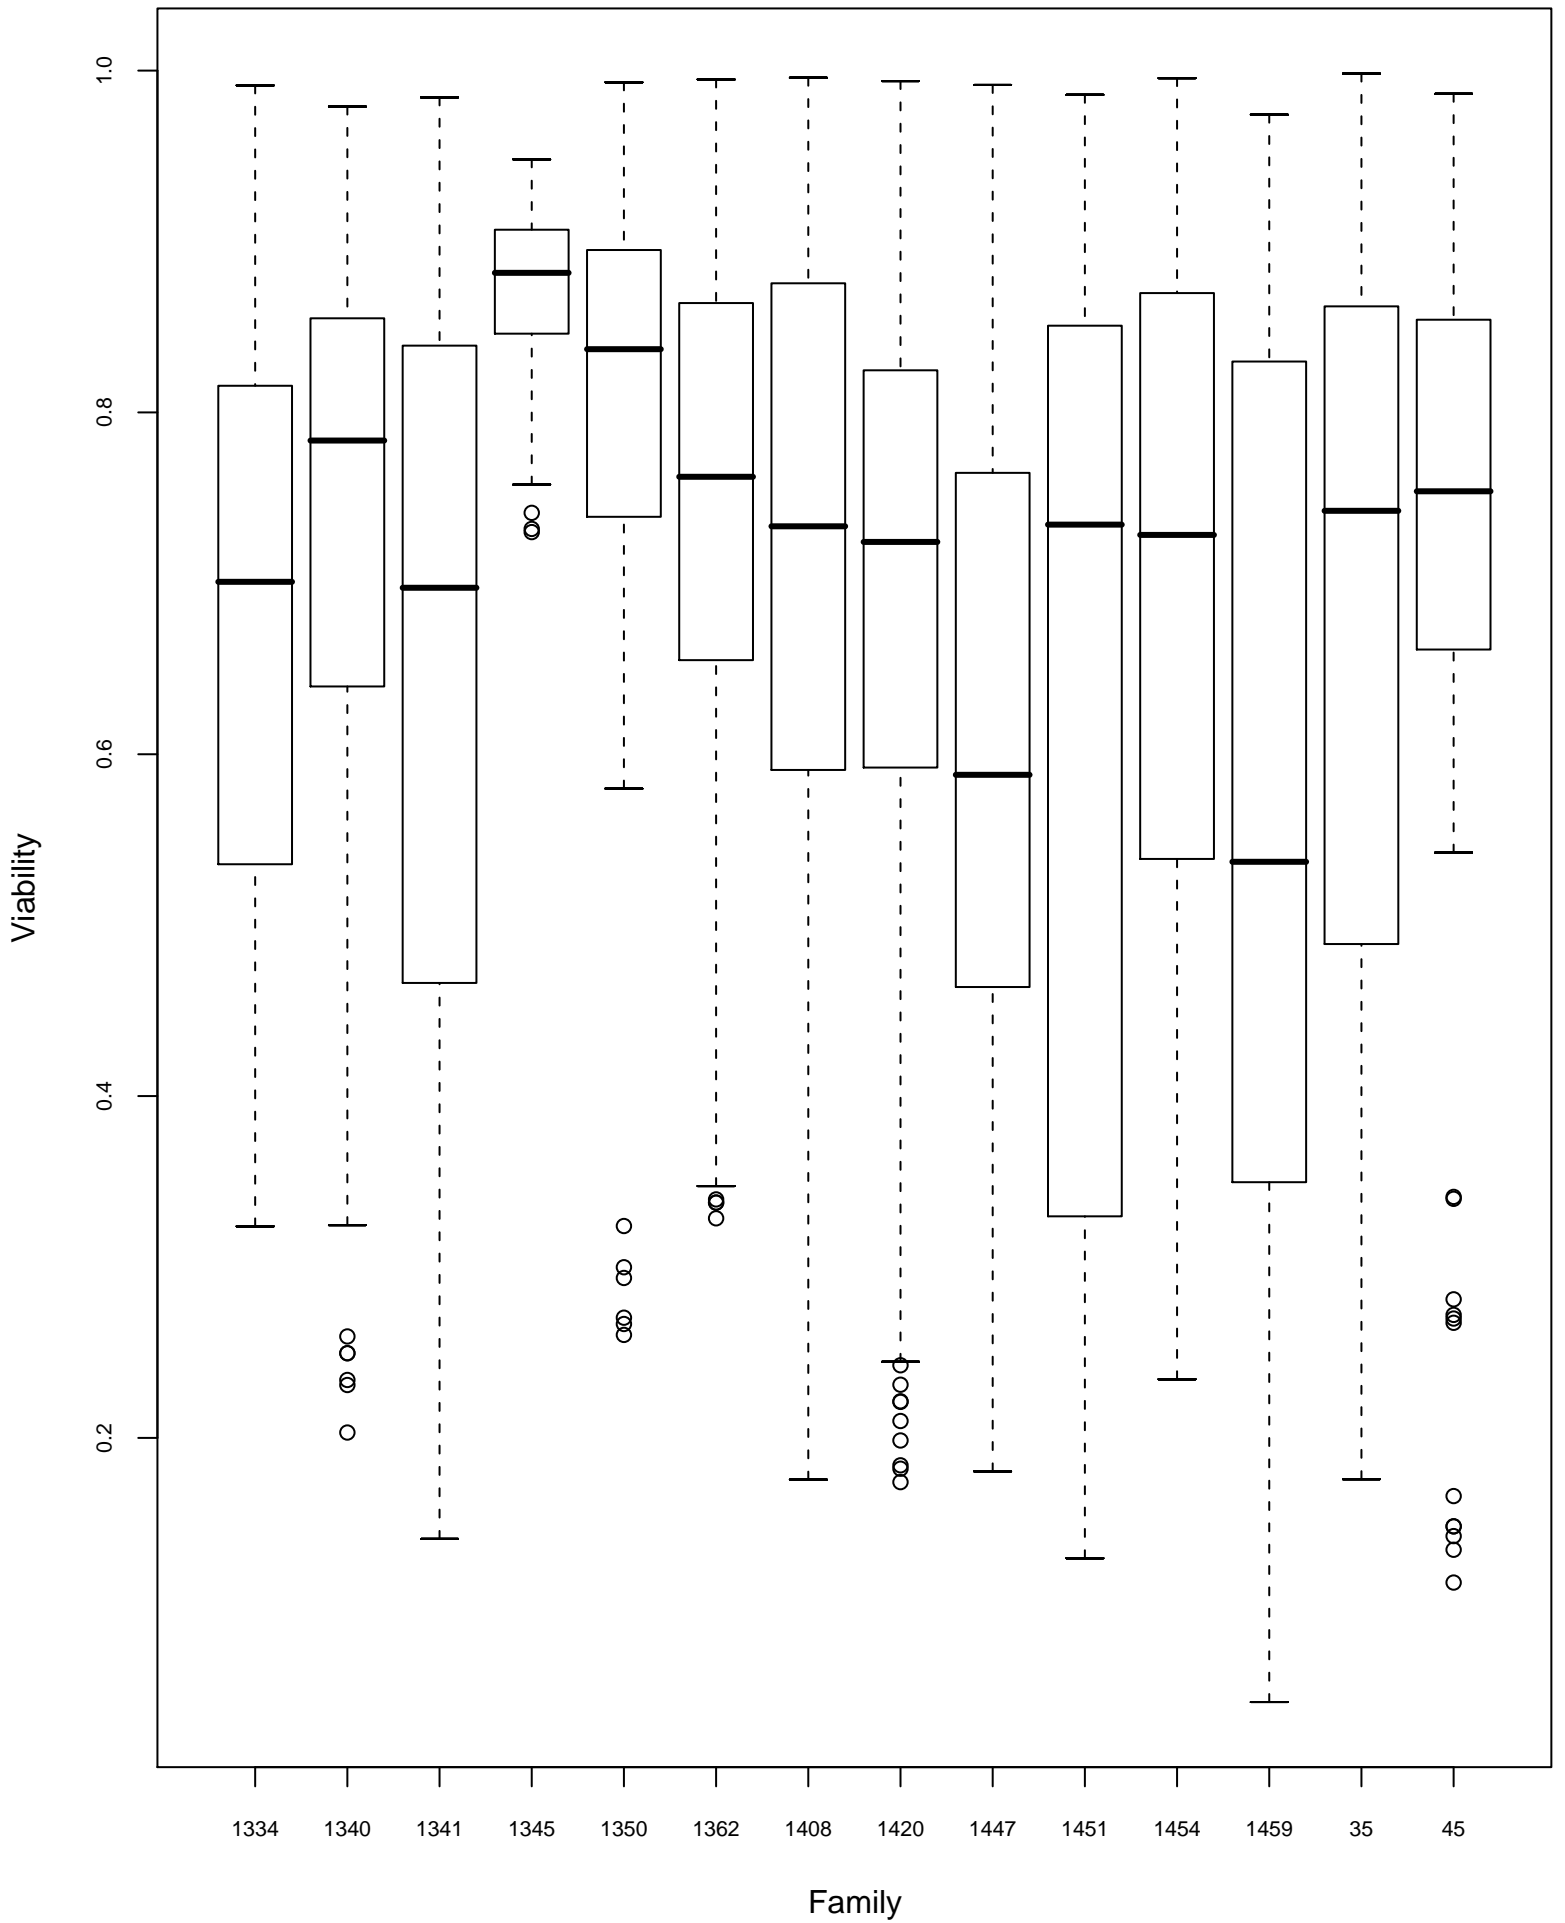

# Drug 9AC, dose 1.2e-05 (mM)

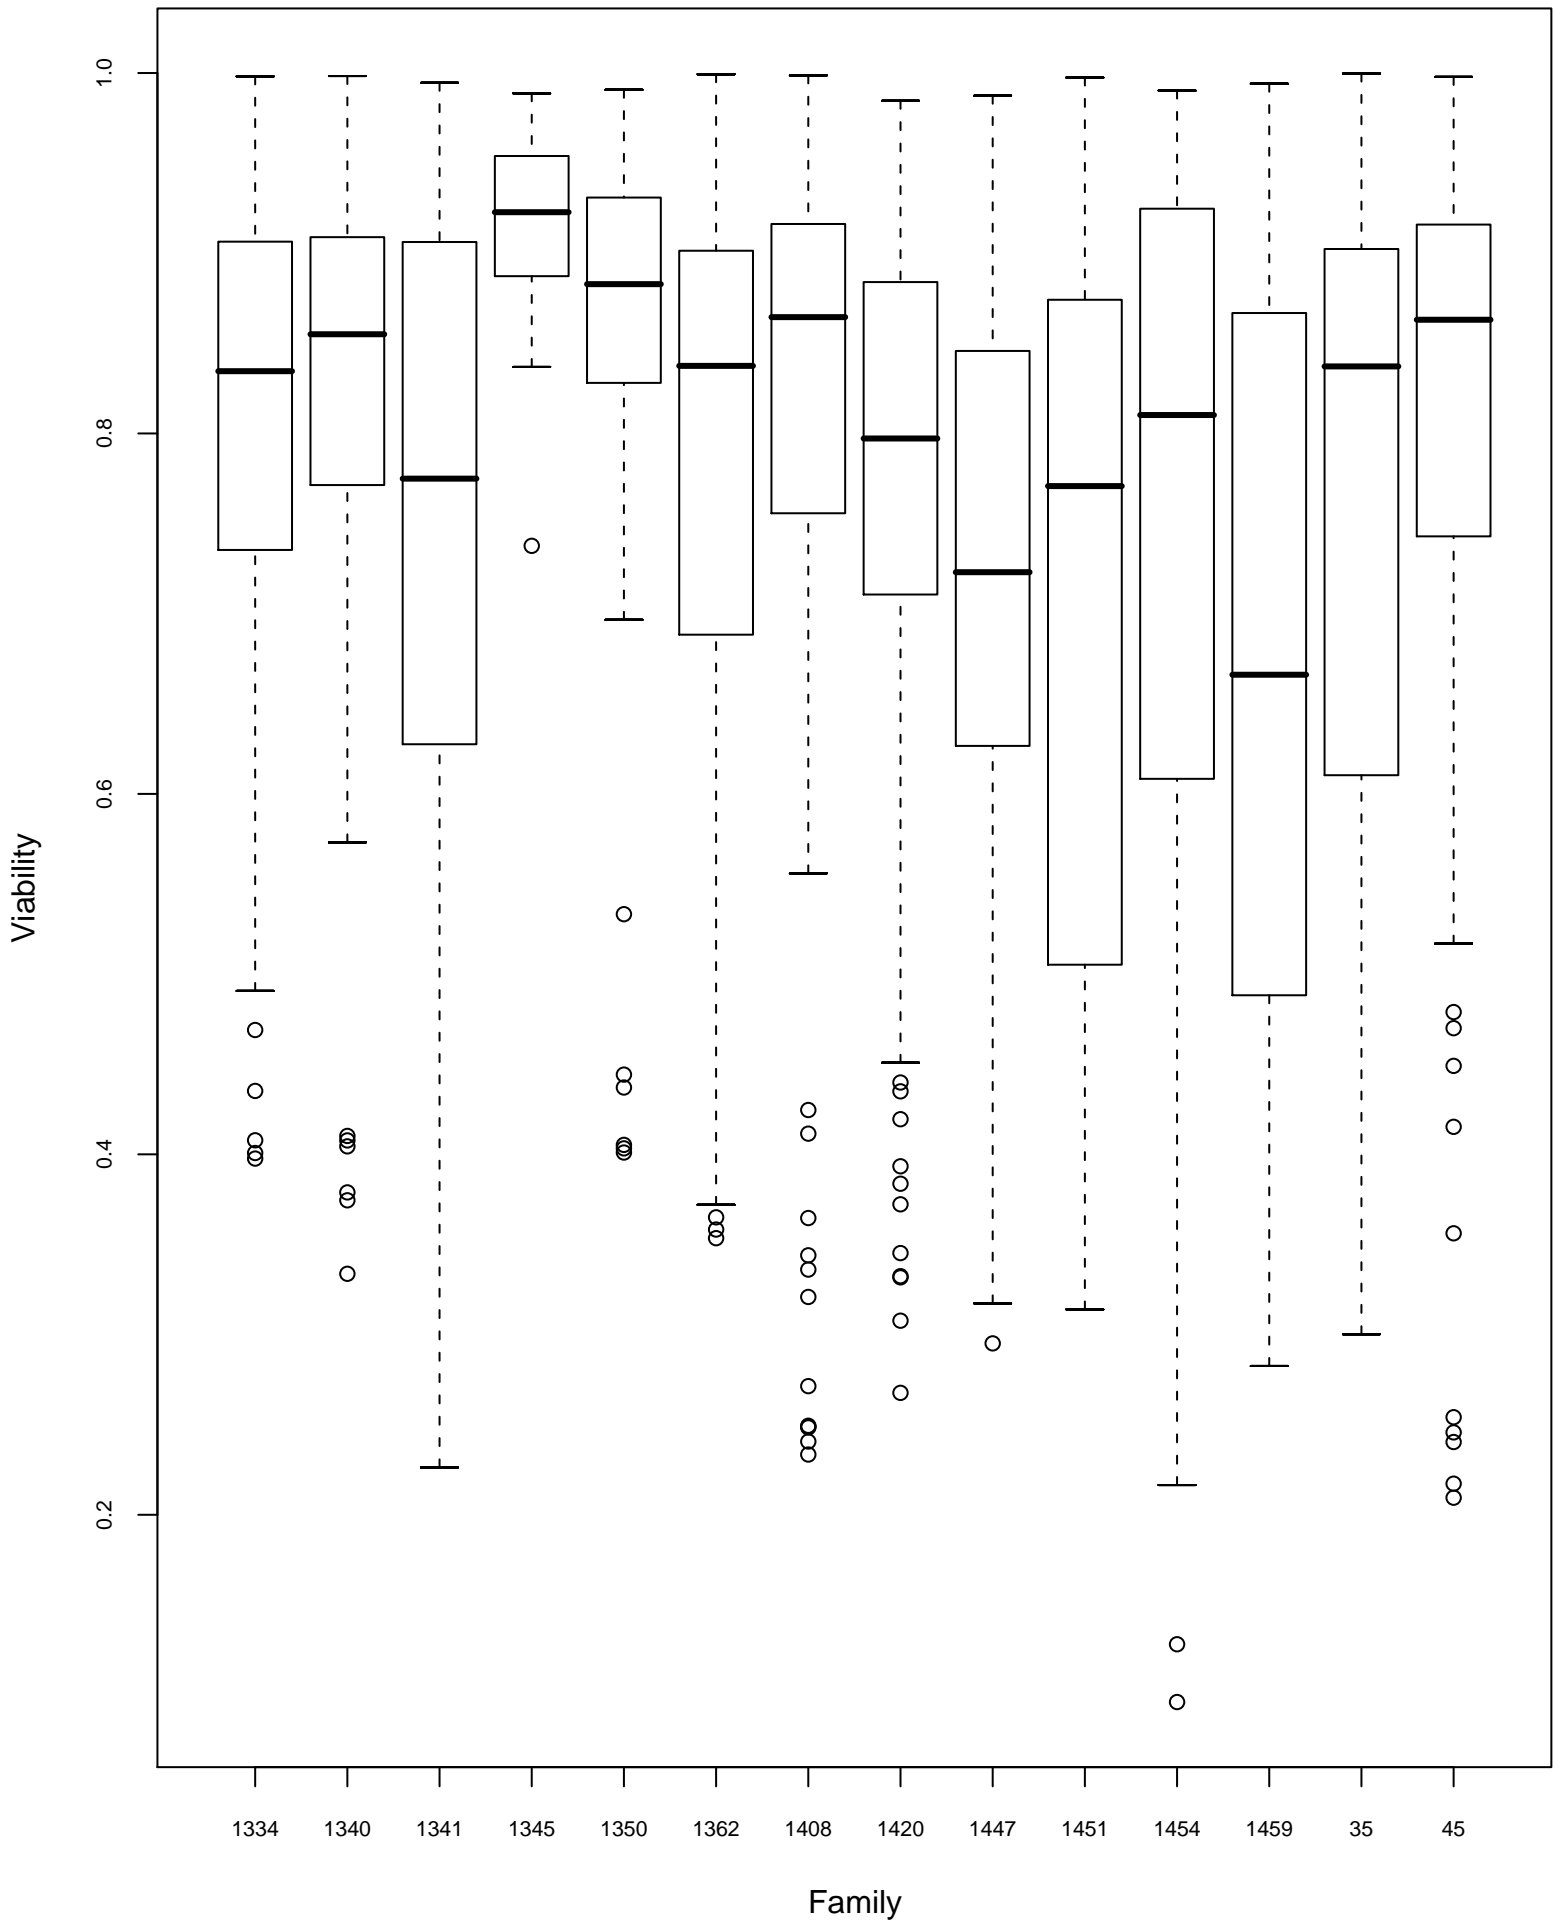

# Drug 9AC, dose 8e-06 (mM)

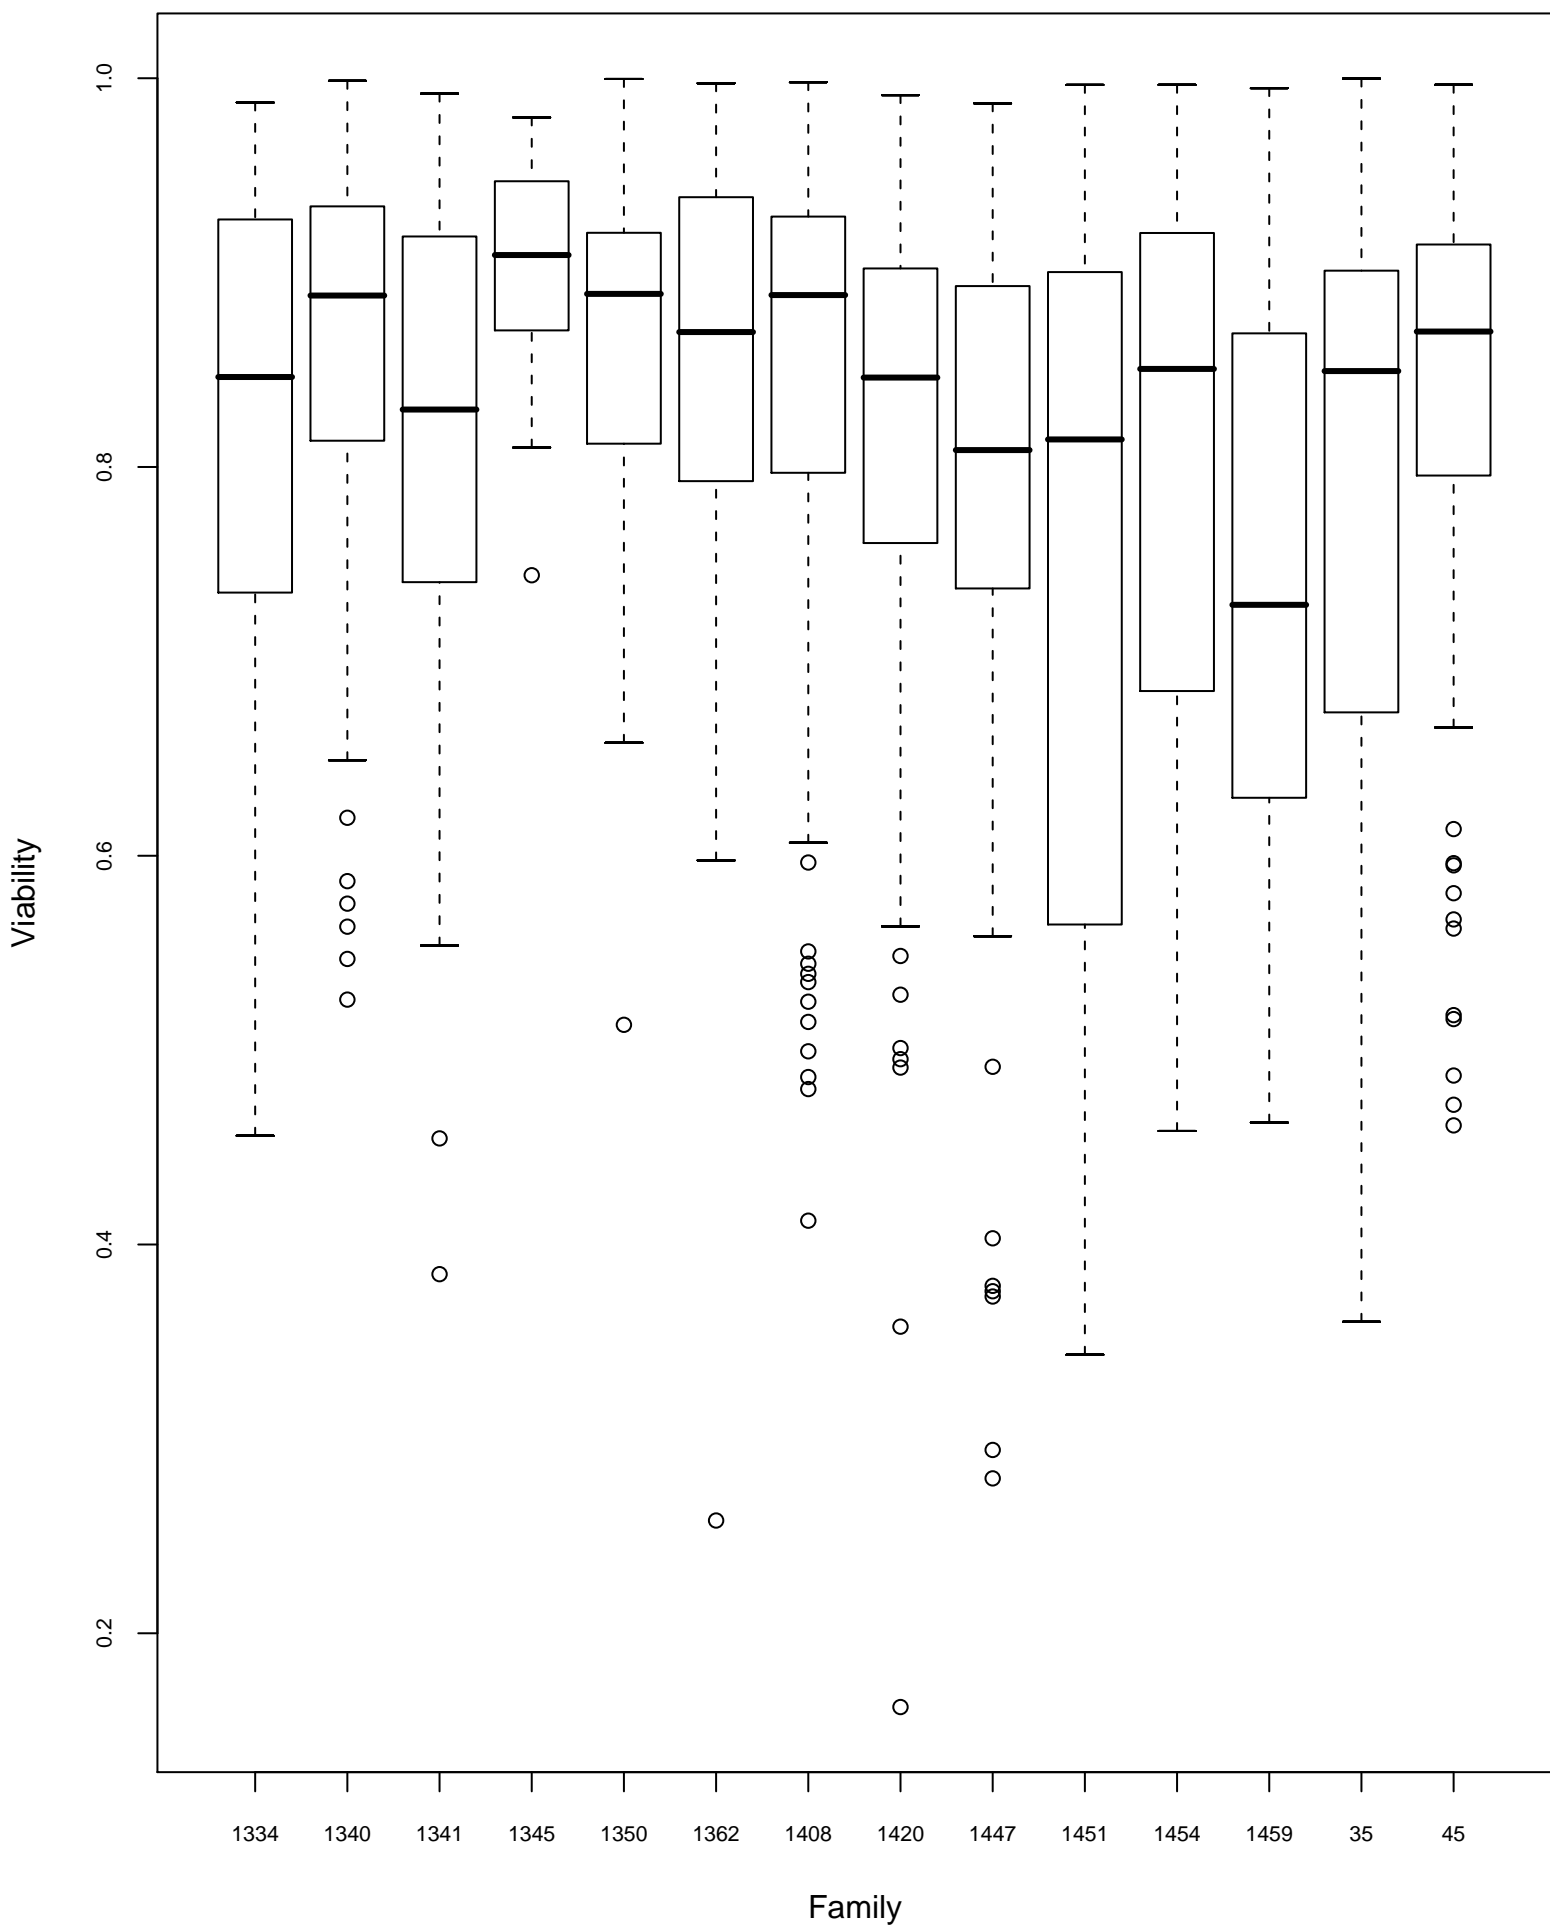

# Drug 9AC, dose 3.2e-06 (mM)

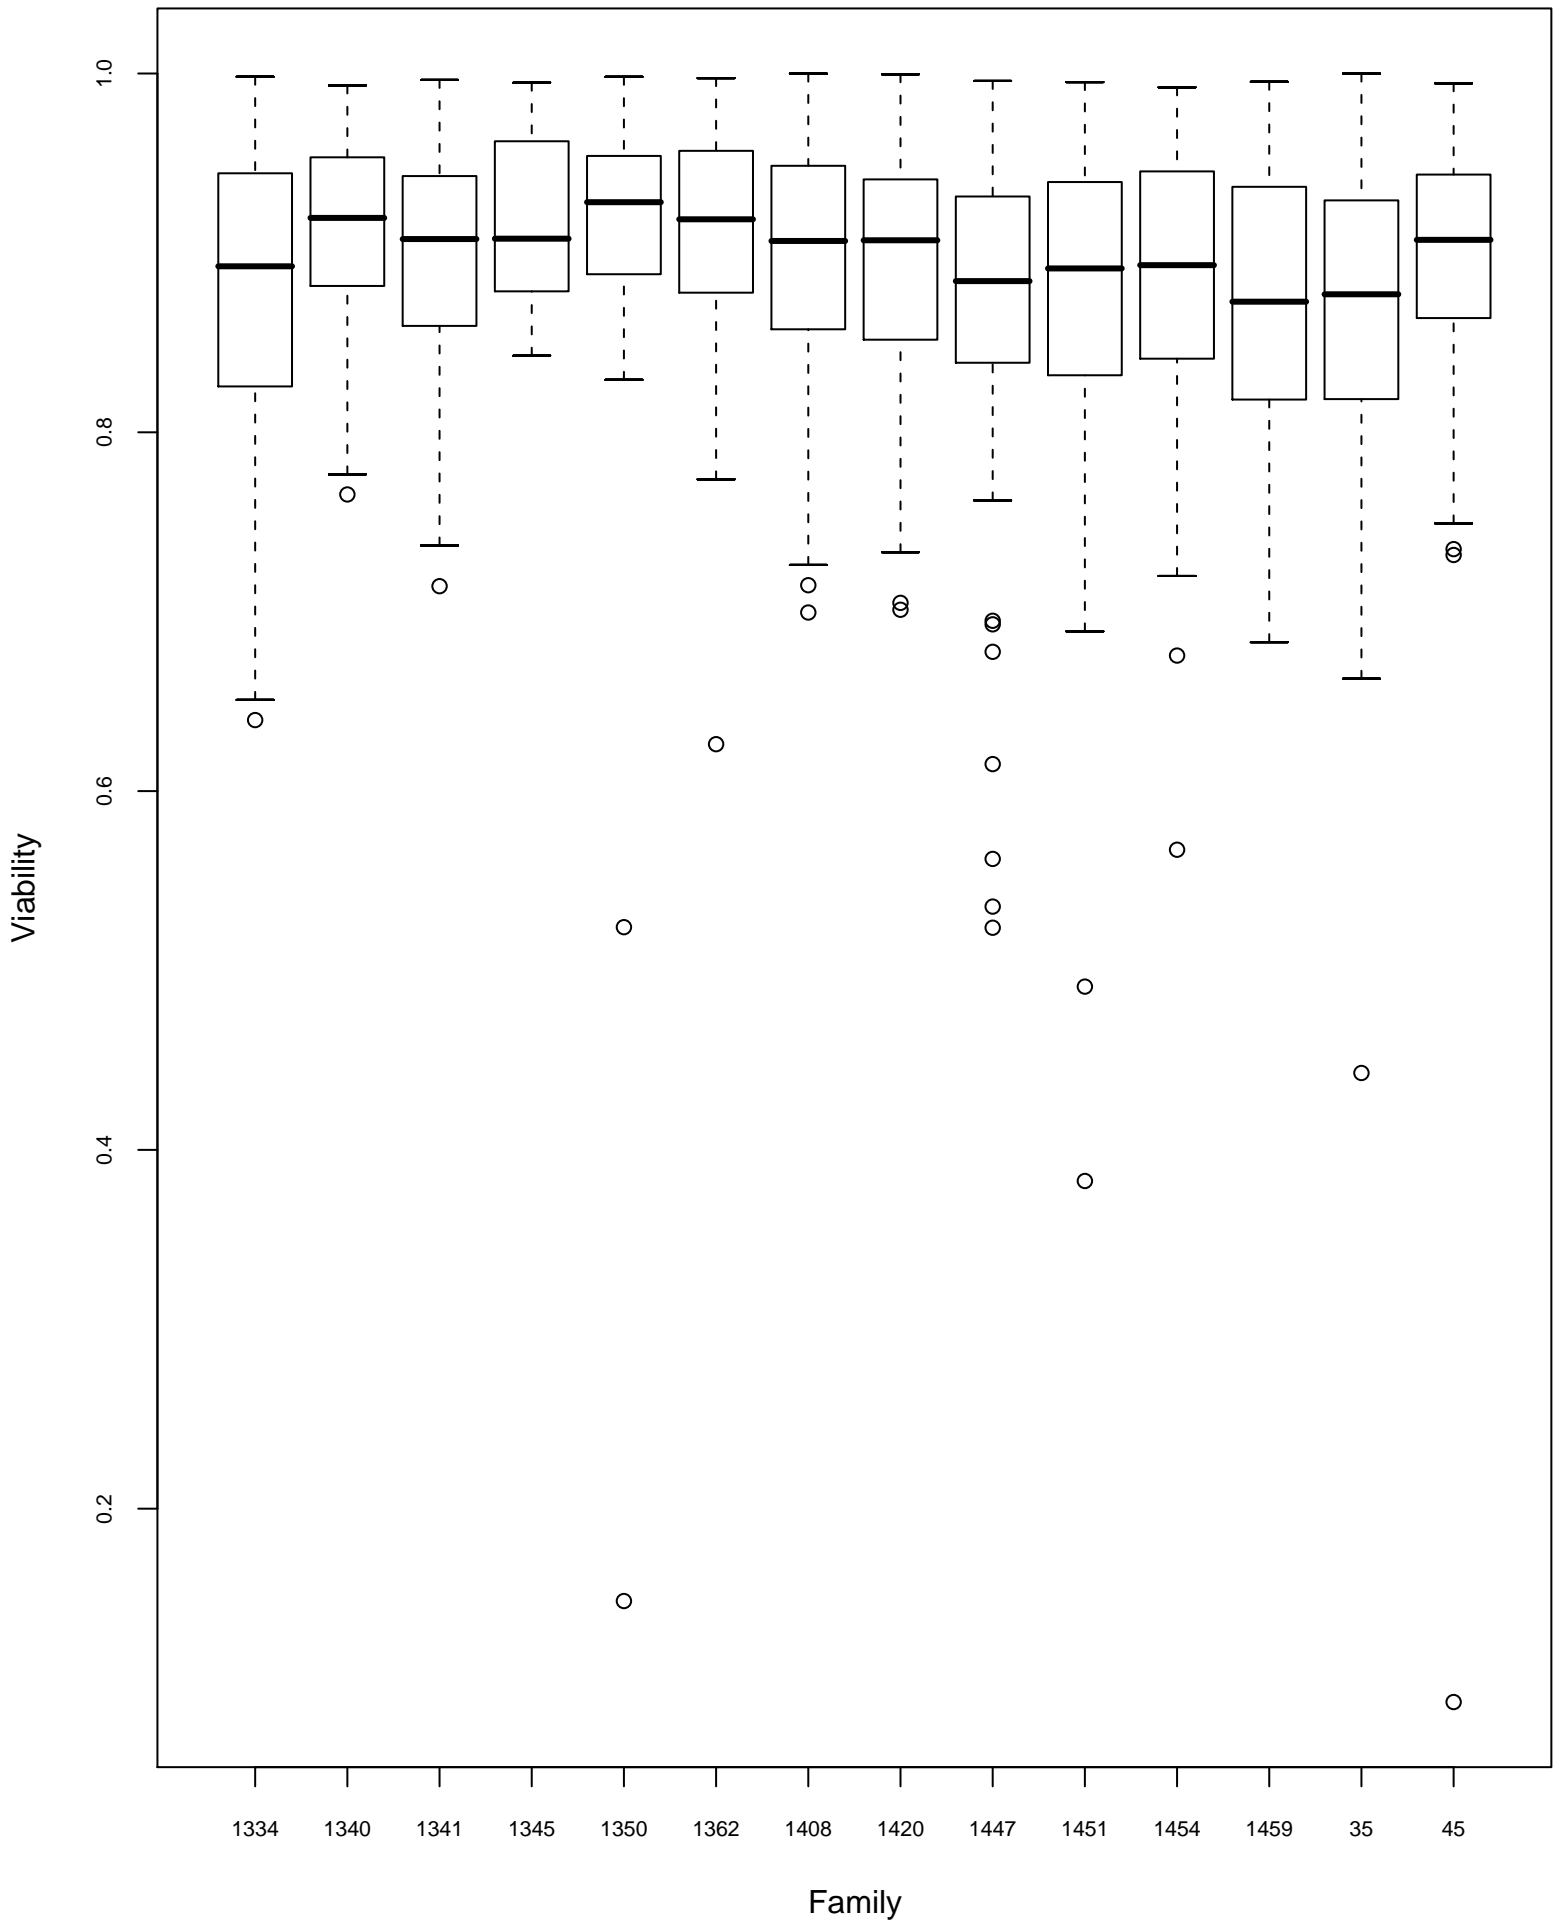

# Drug 9AC, dose 6.4e-07 (mM)

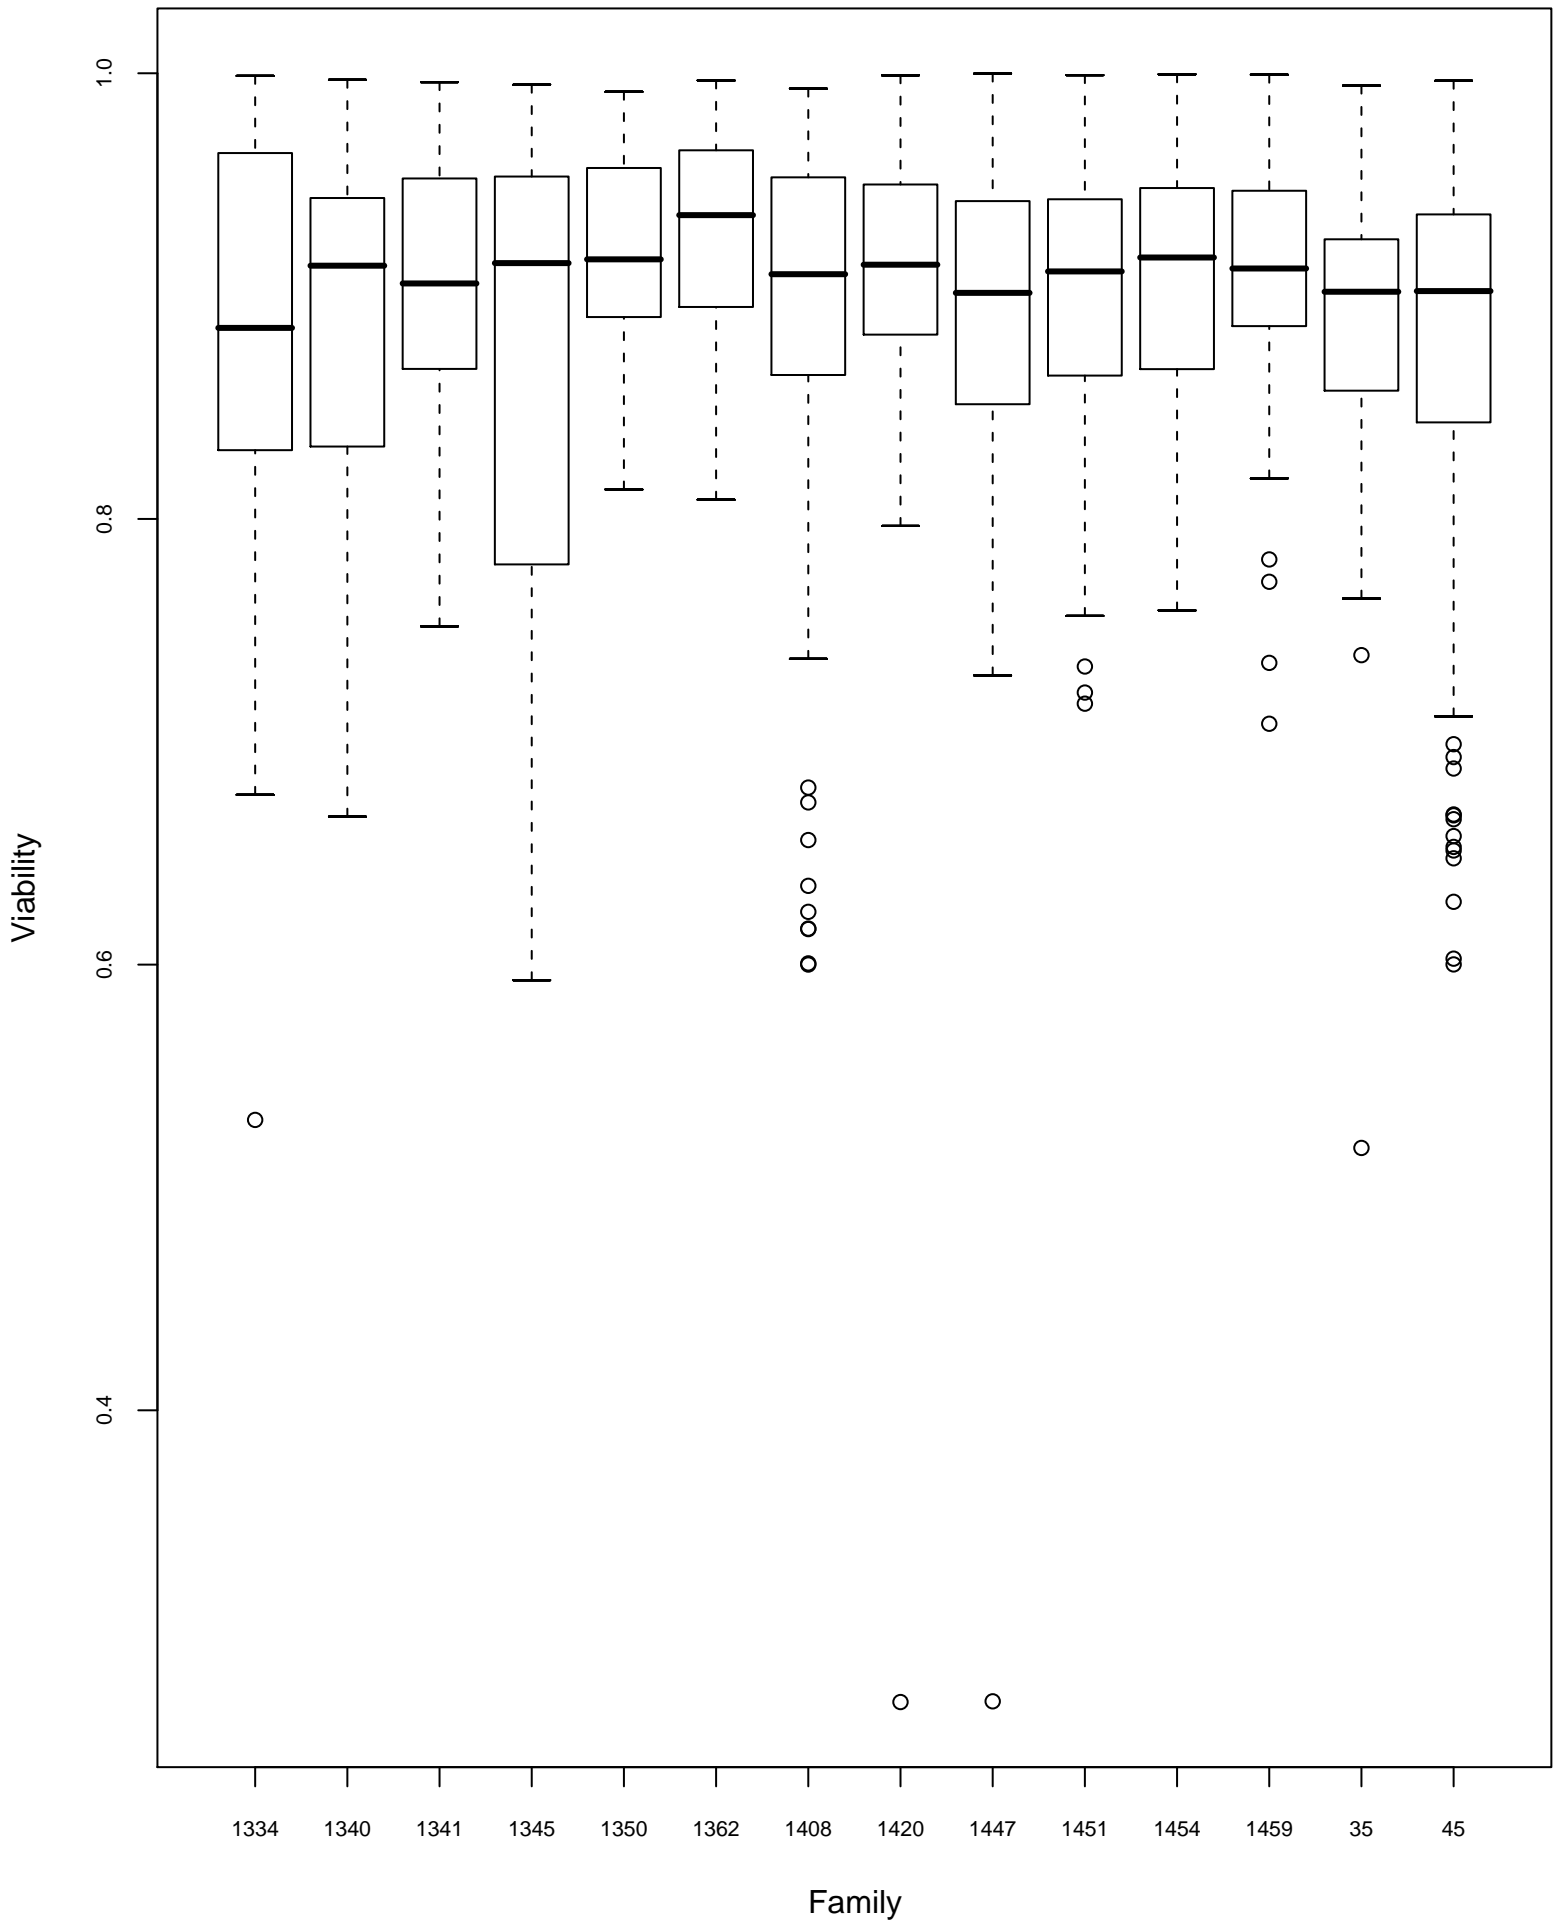



# Drug 9AC, dose 6e-08 (mM)

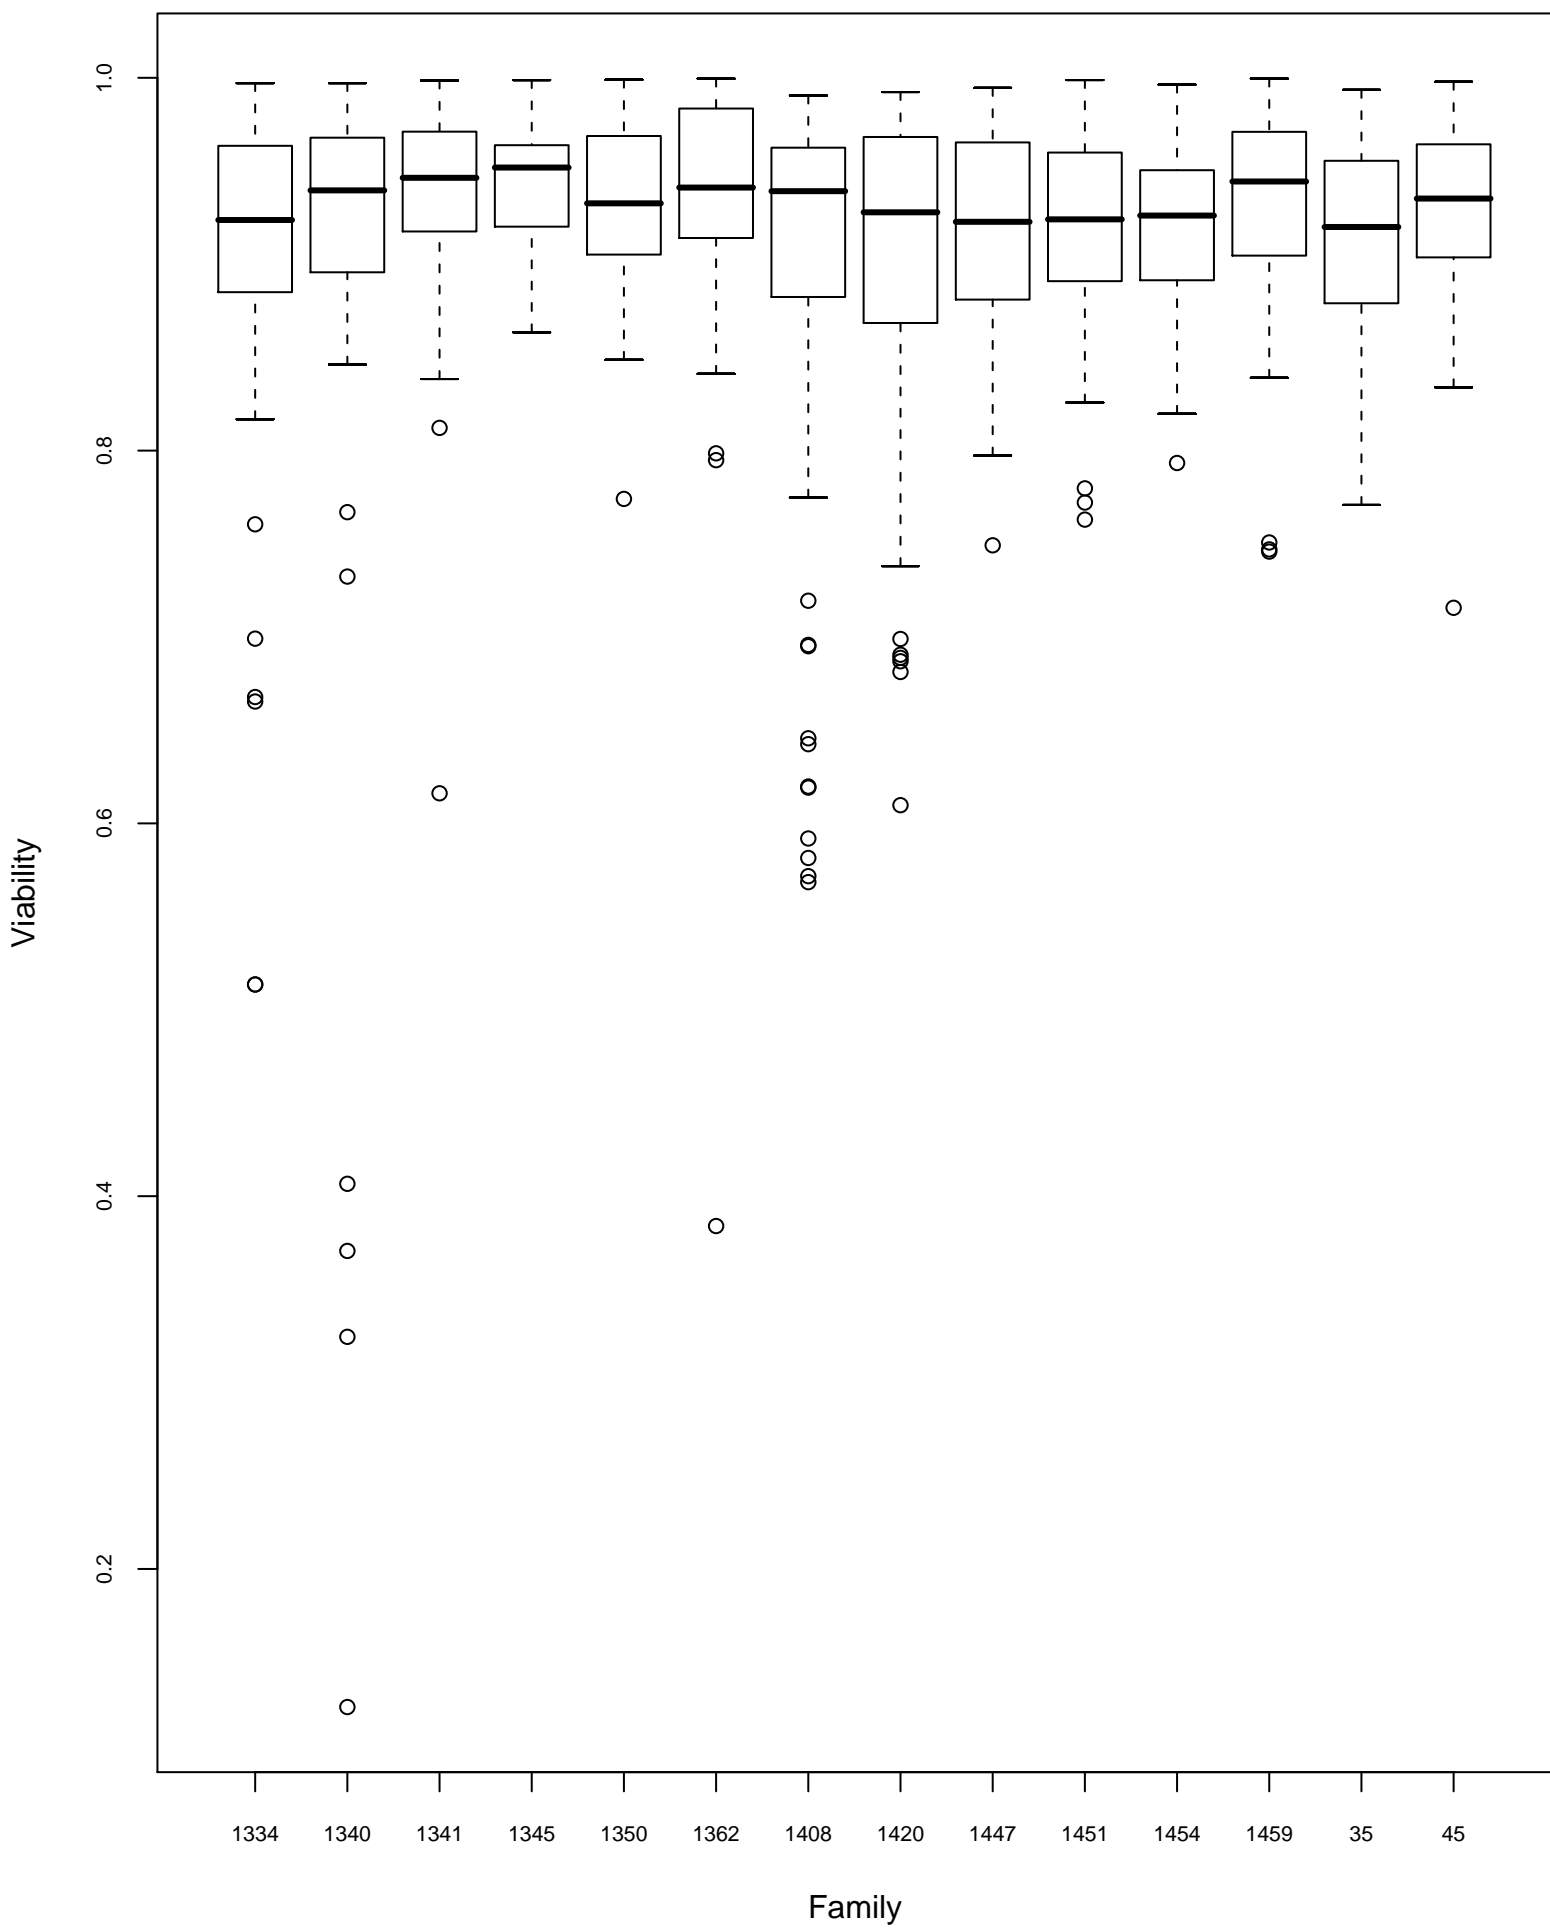

# Drug 9NC, dose 0.01 (mM)

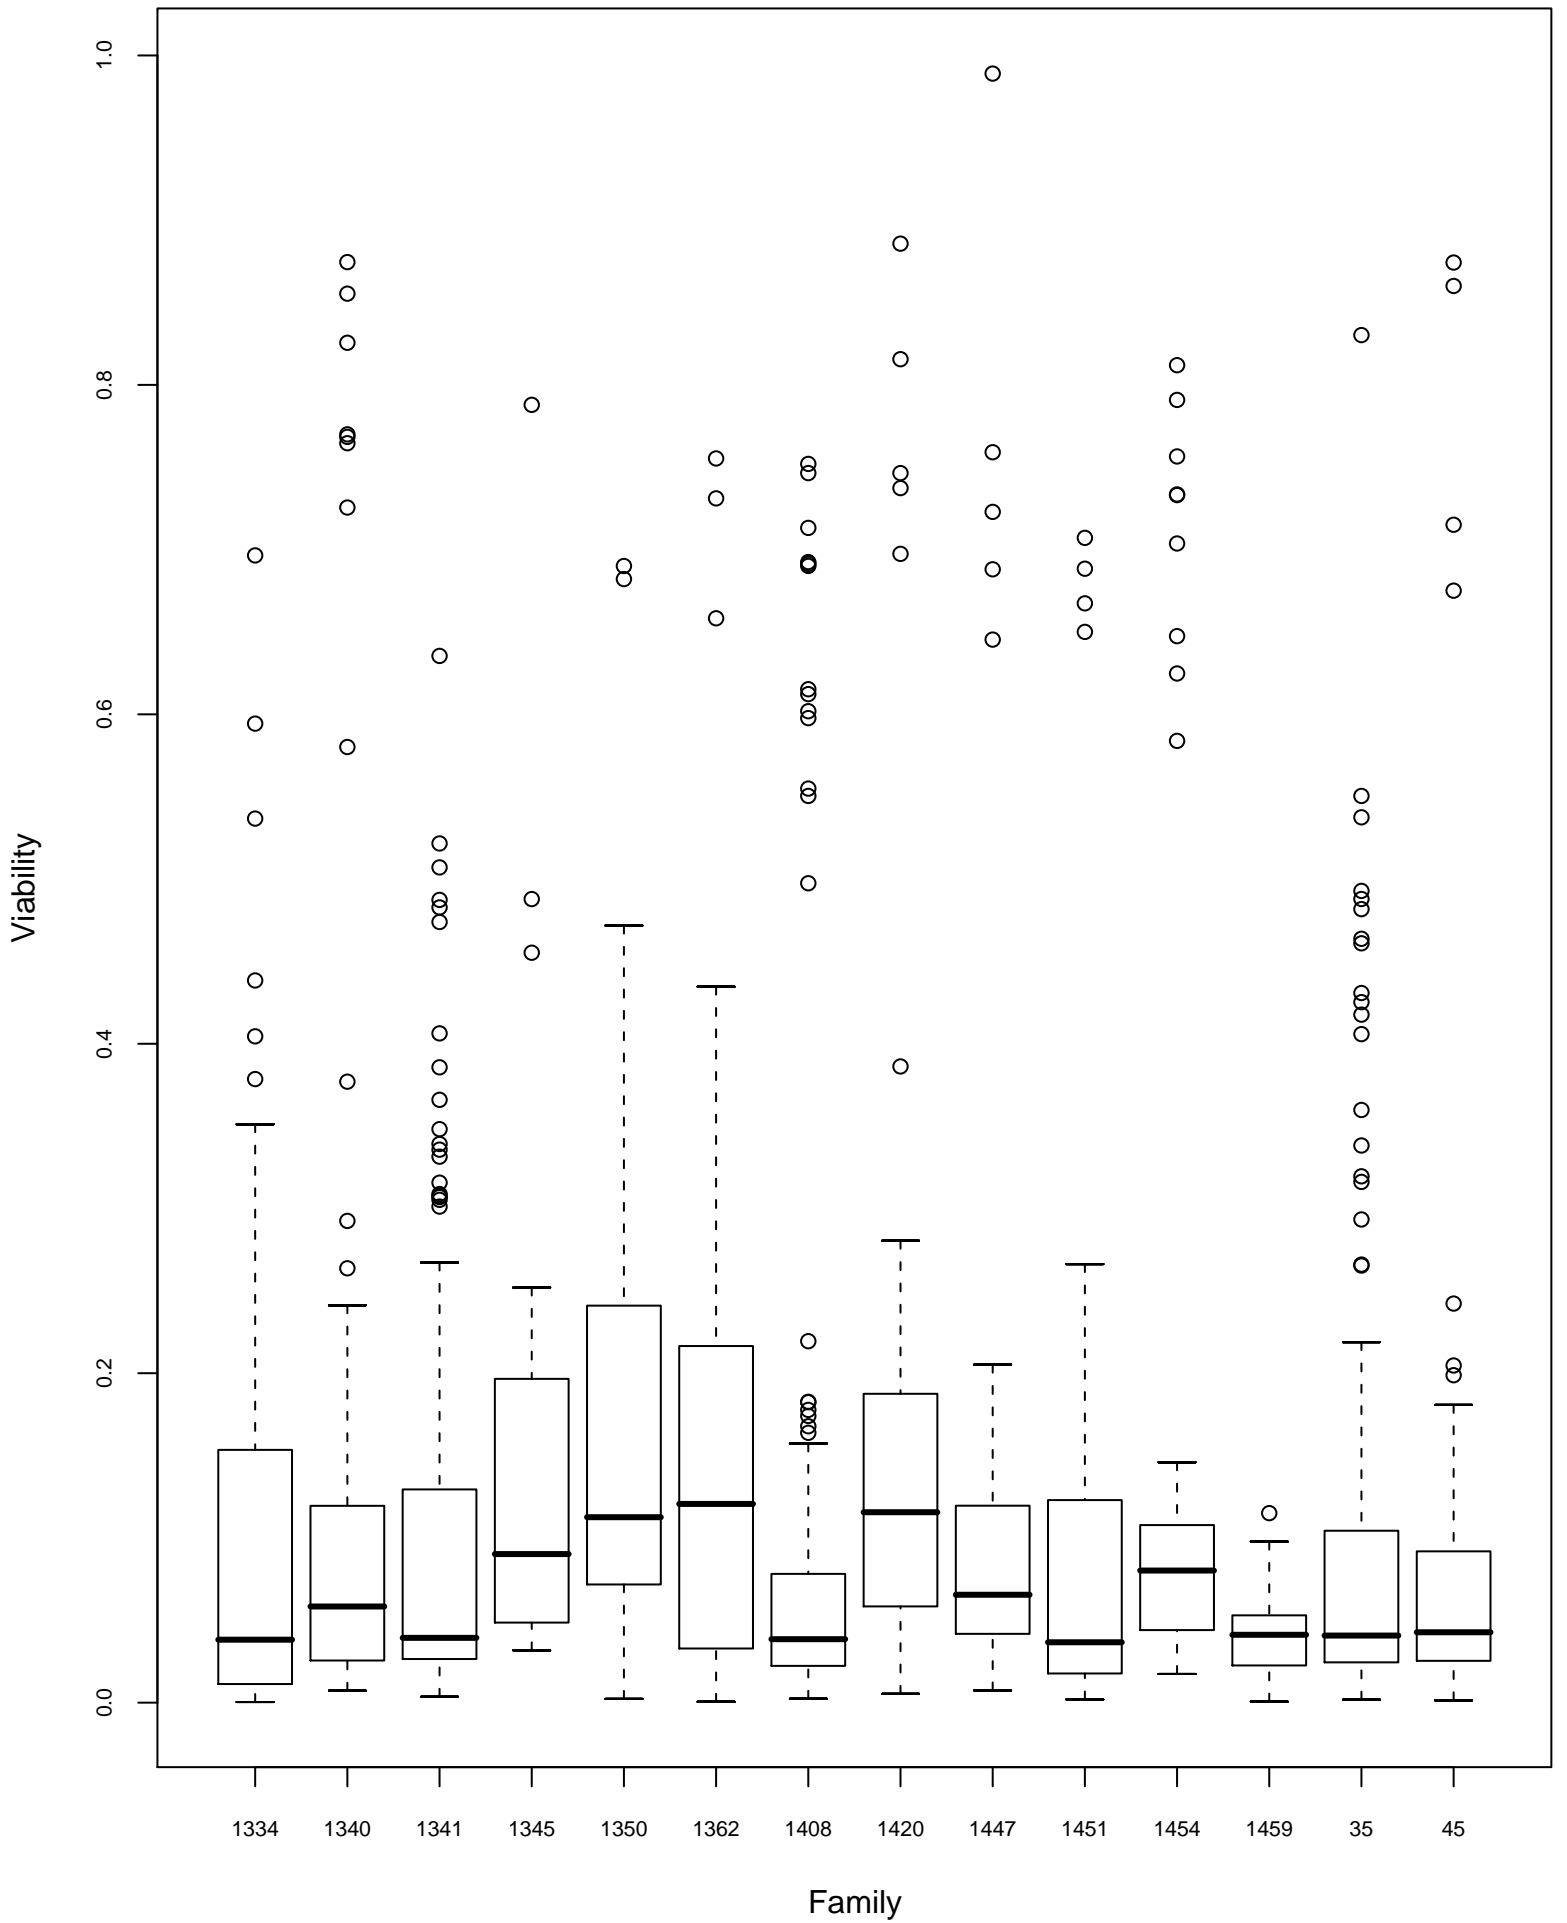

# Drug 9NC, dose 0.002 (mM)

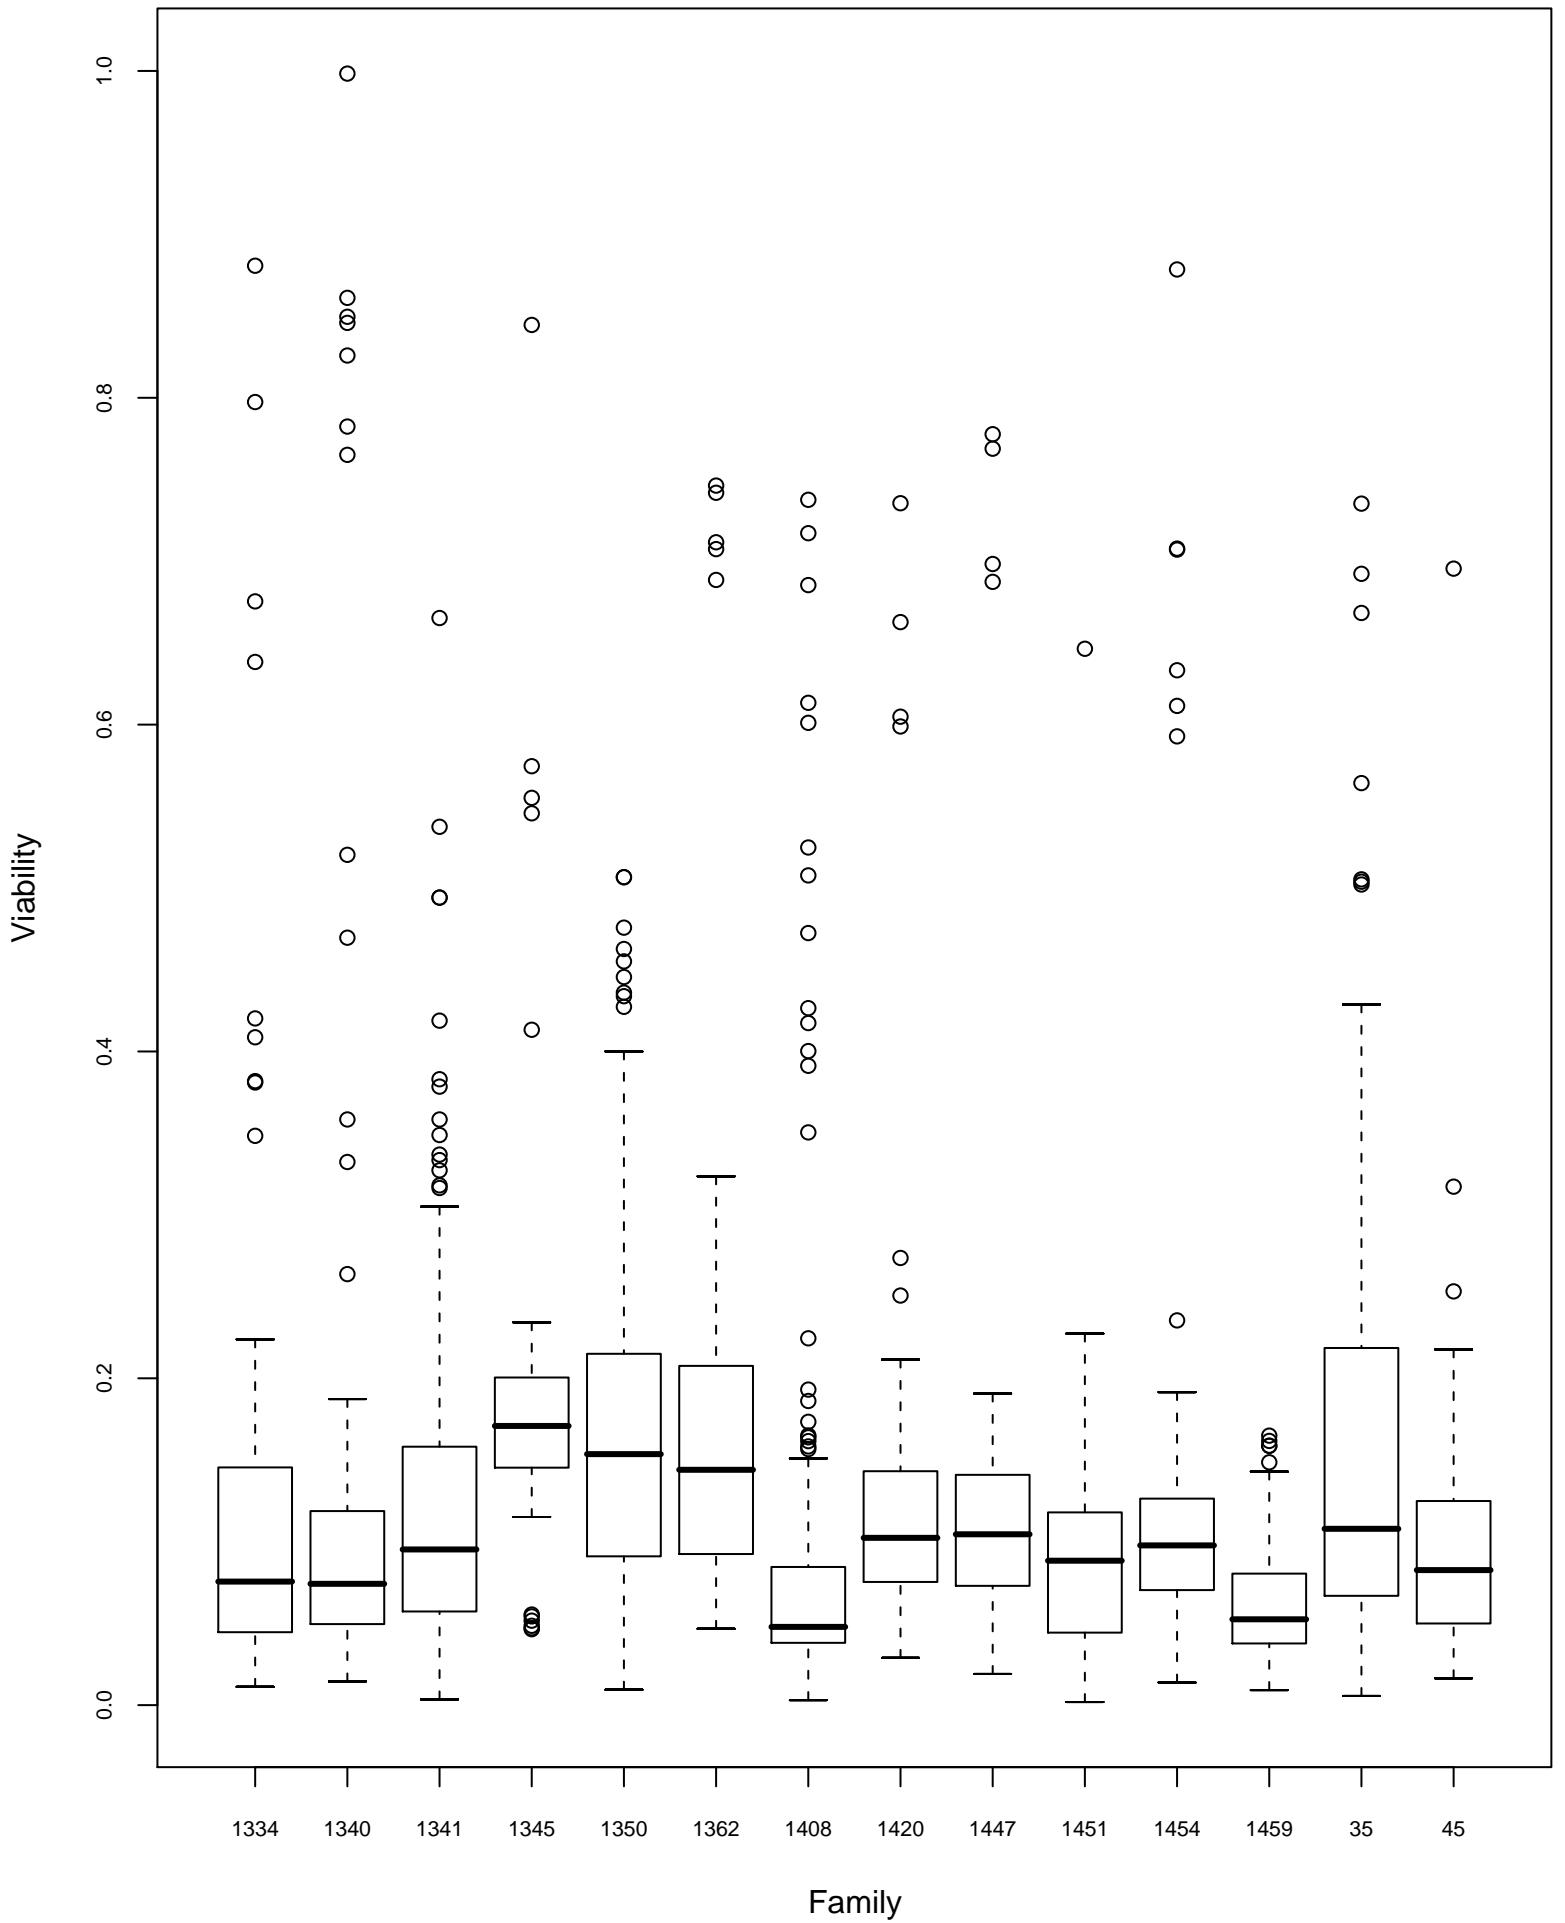

# Drug 9NC, dose 8e-05 (mM)

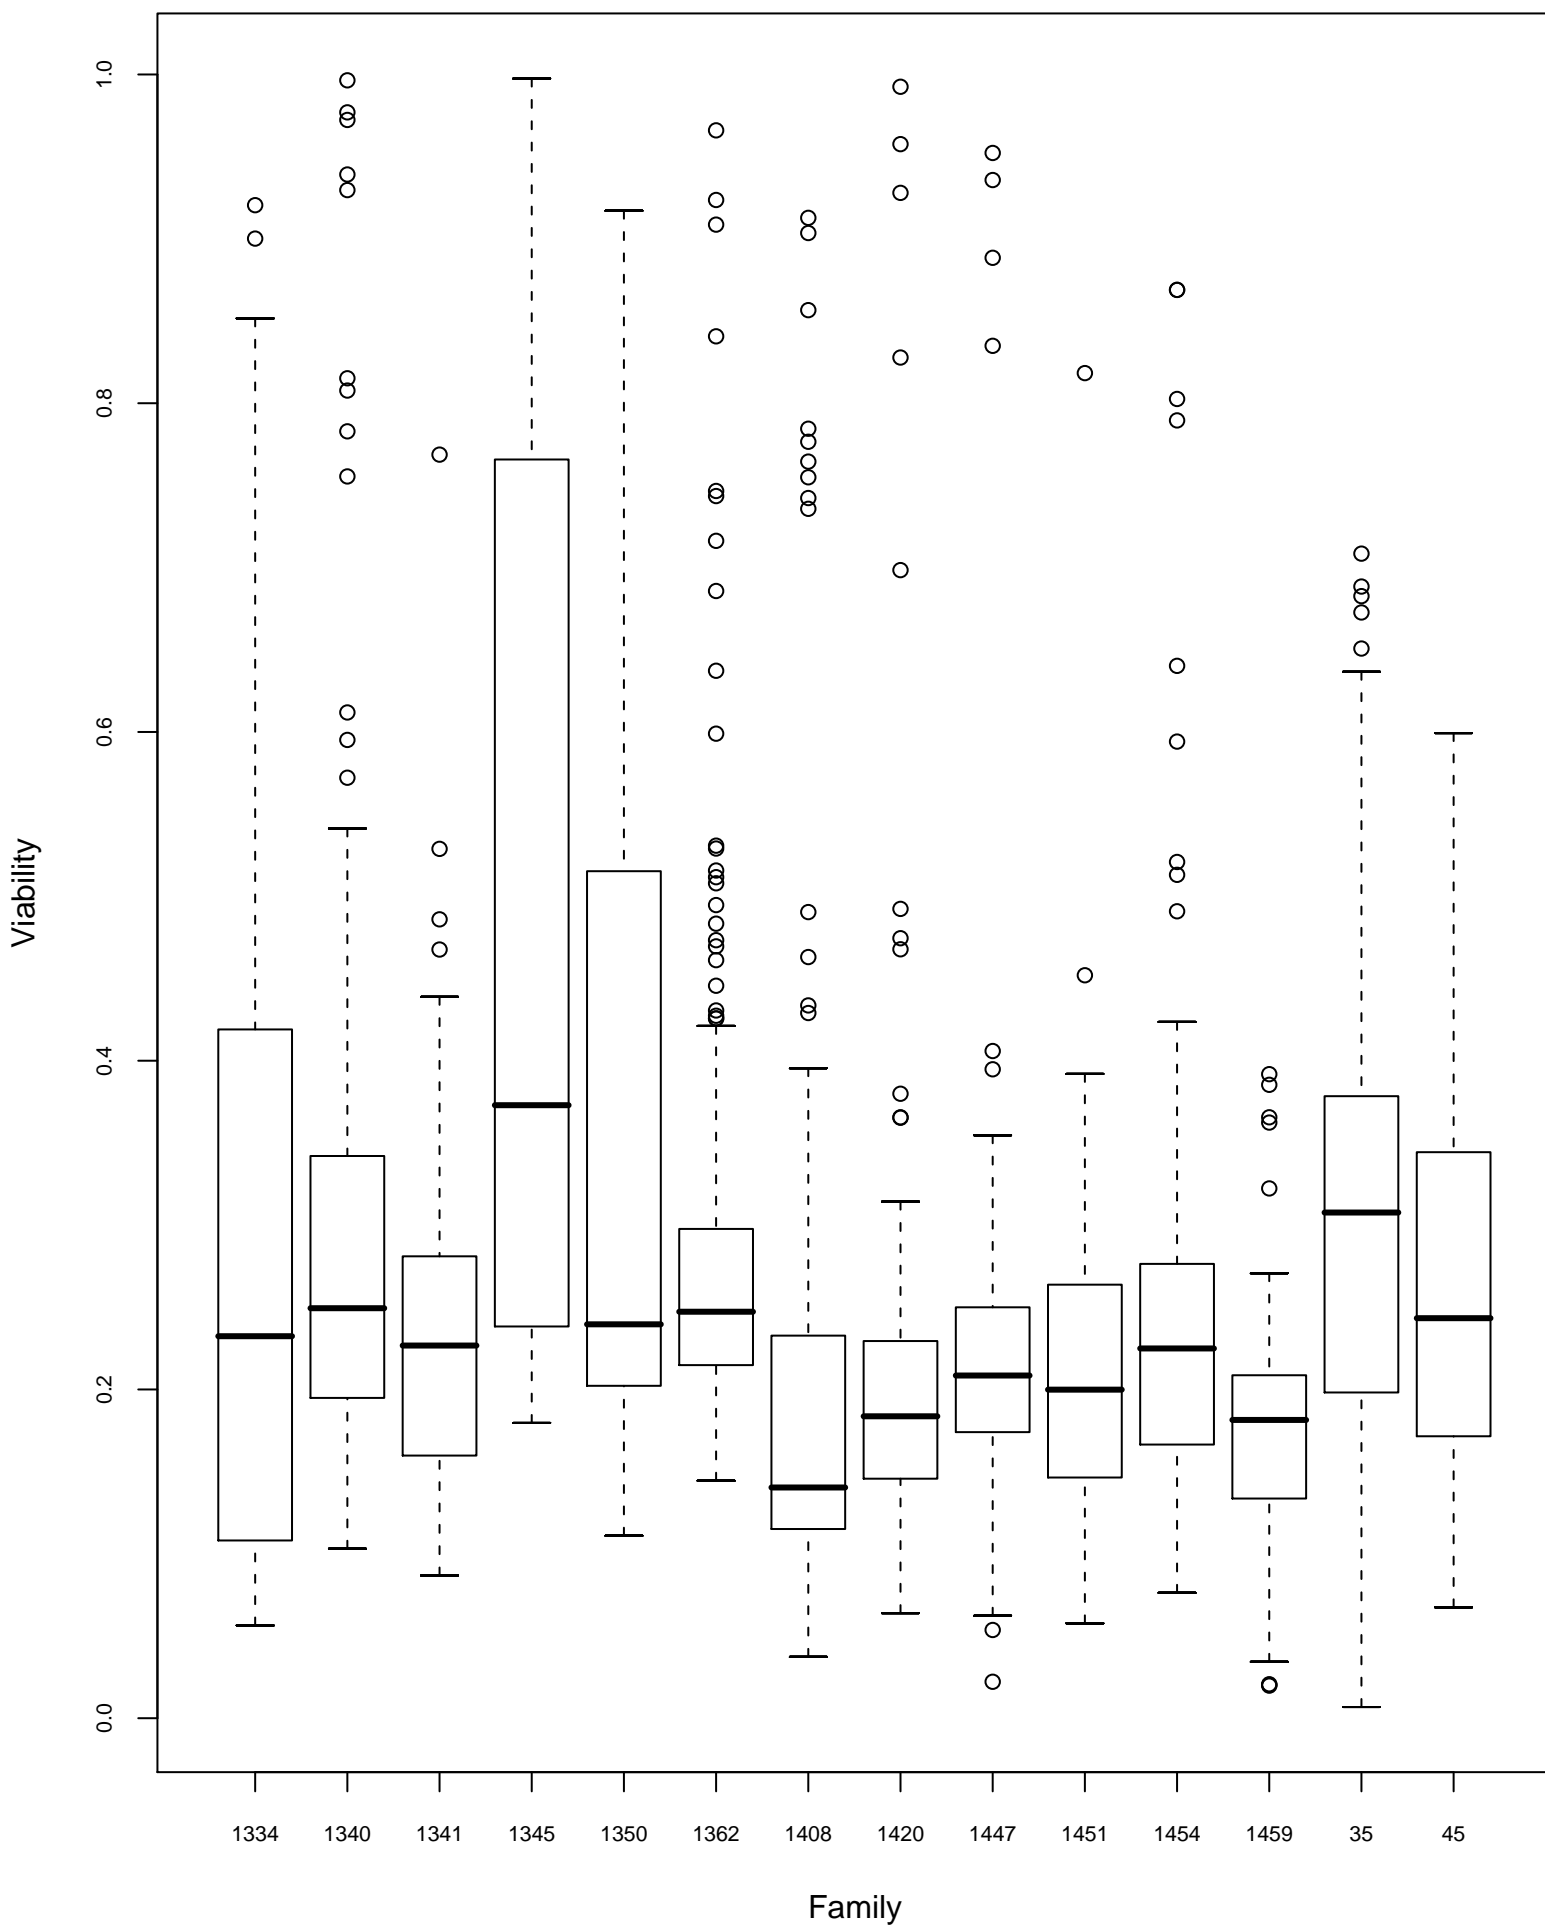

# Drug 9NC, dose 1.5e-05 (mM)

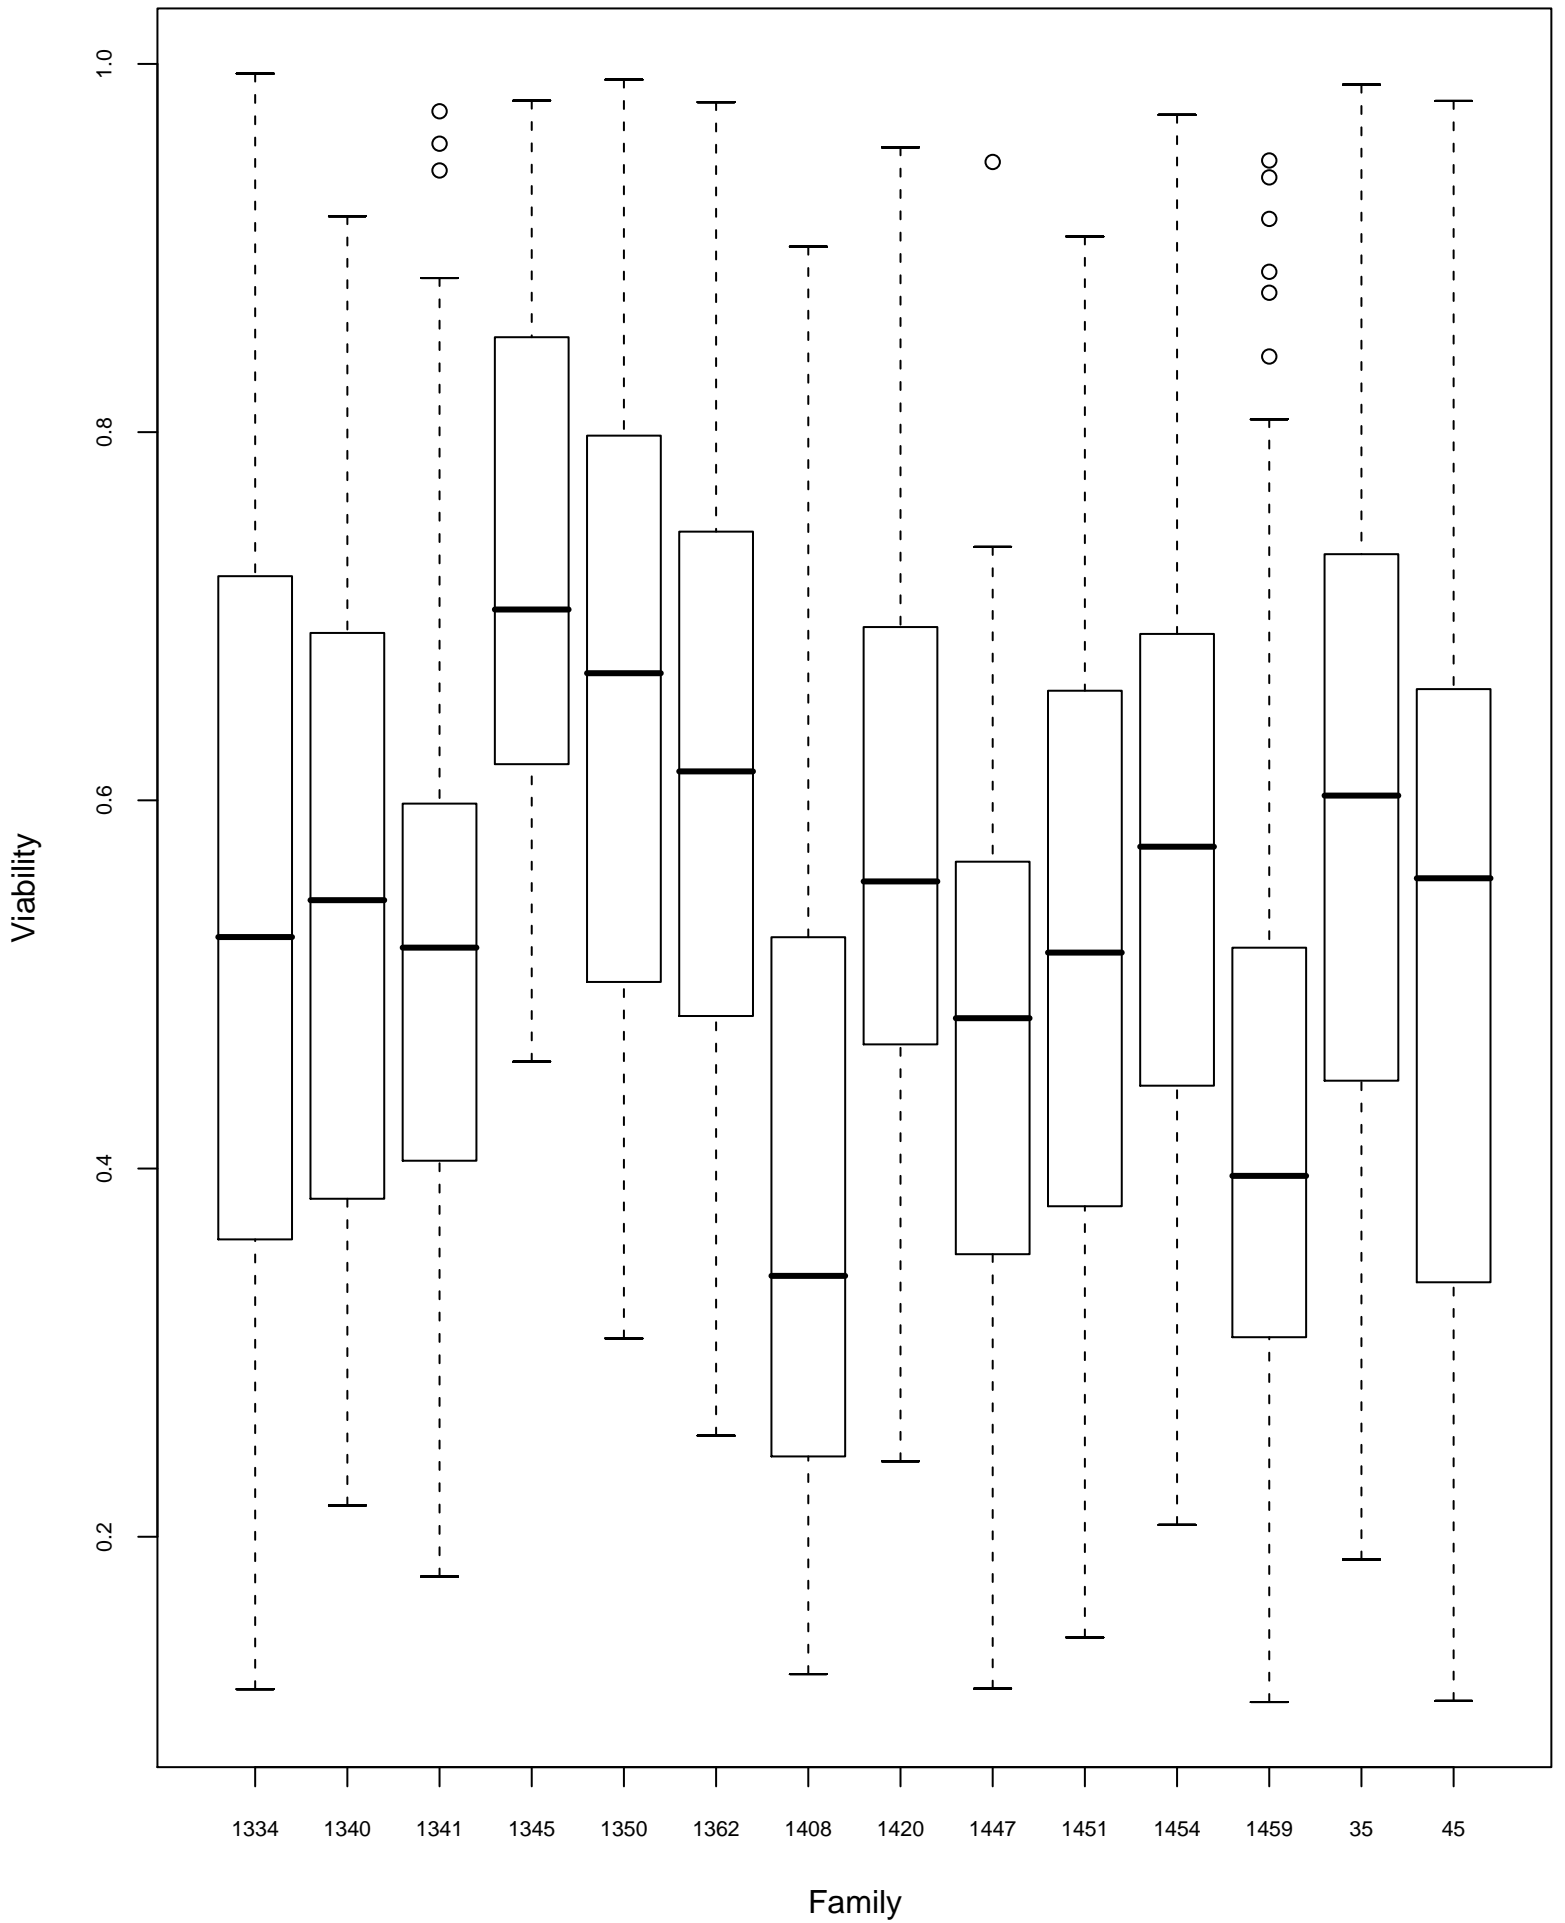

# Drug 9NC, dose 8e-06 (mM)

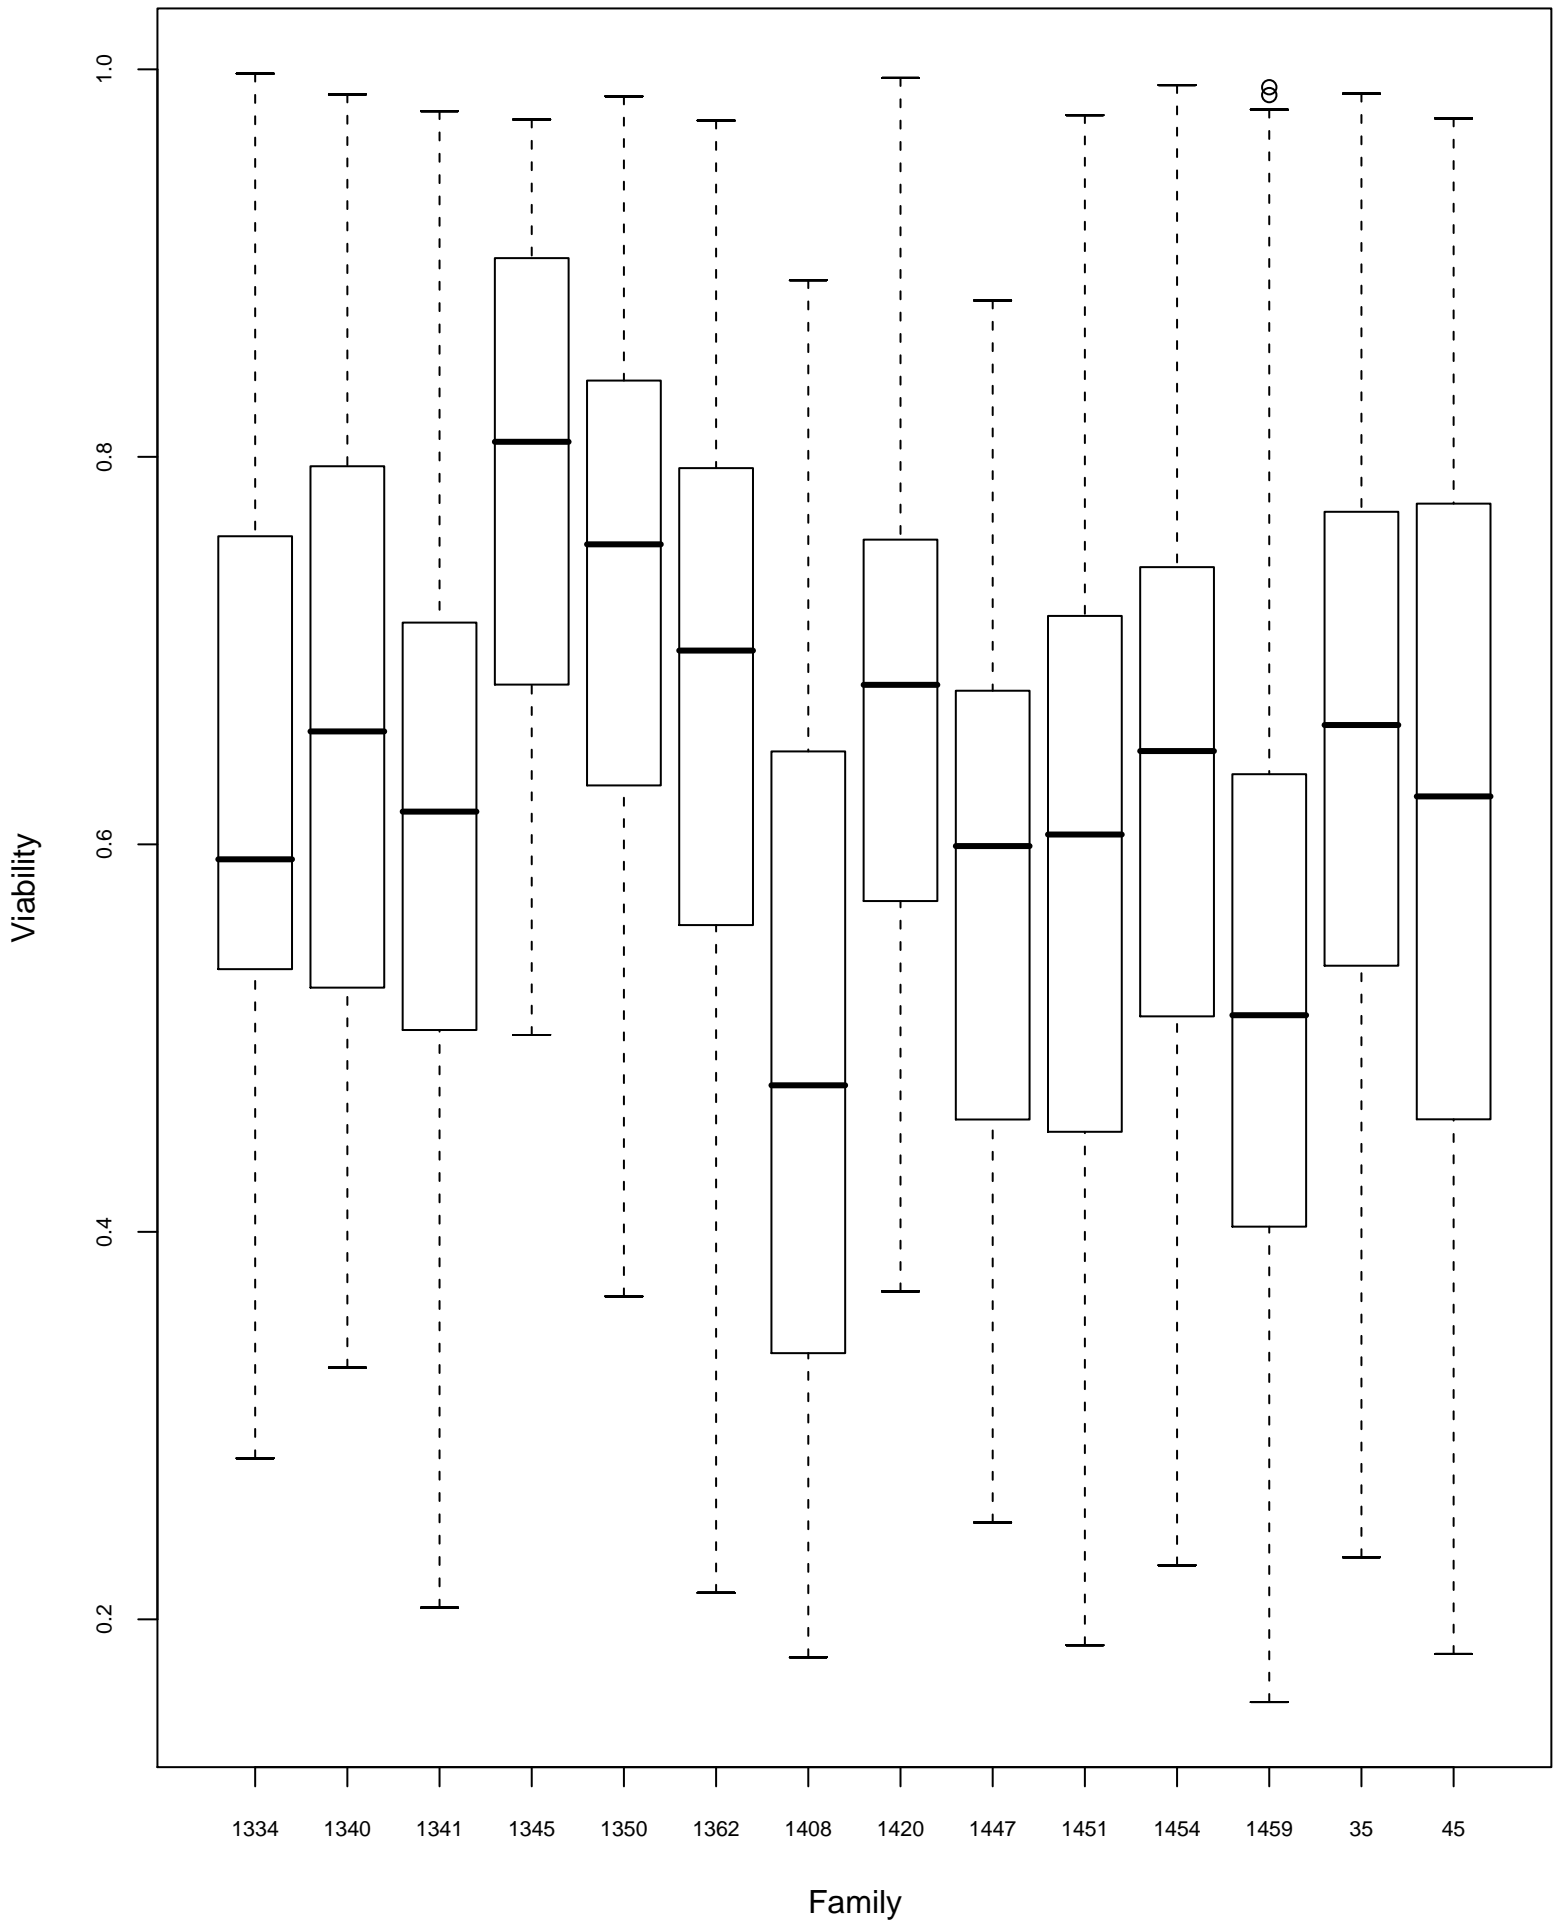

# Drug 9NC, dose 5e-06 (mM)

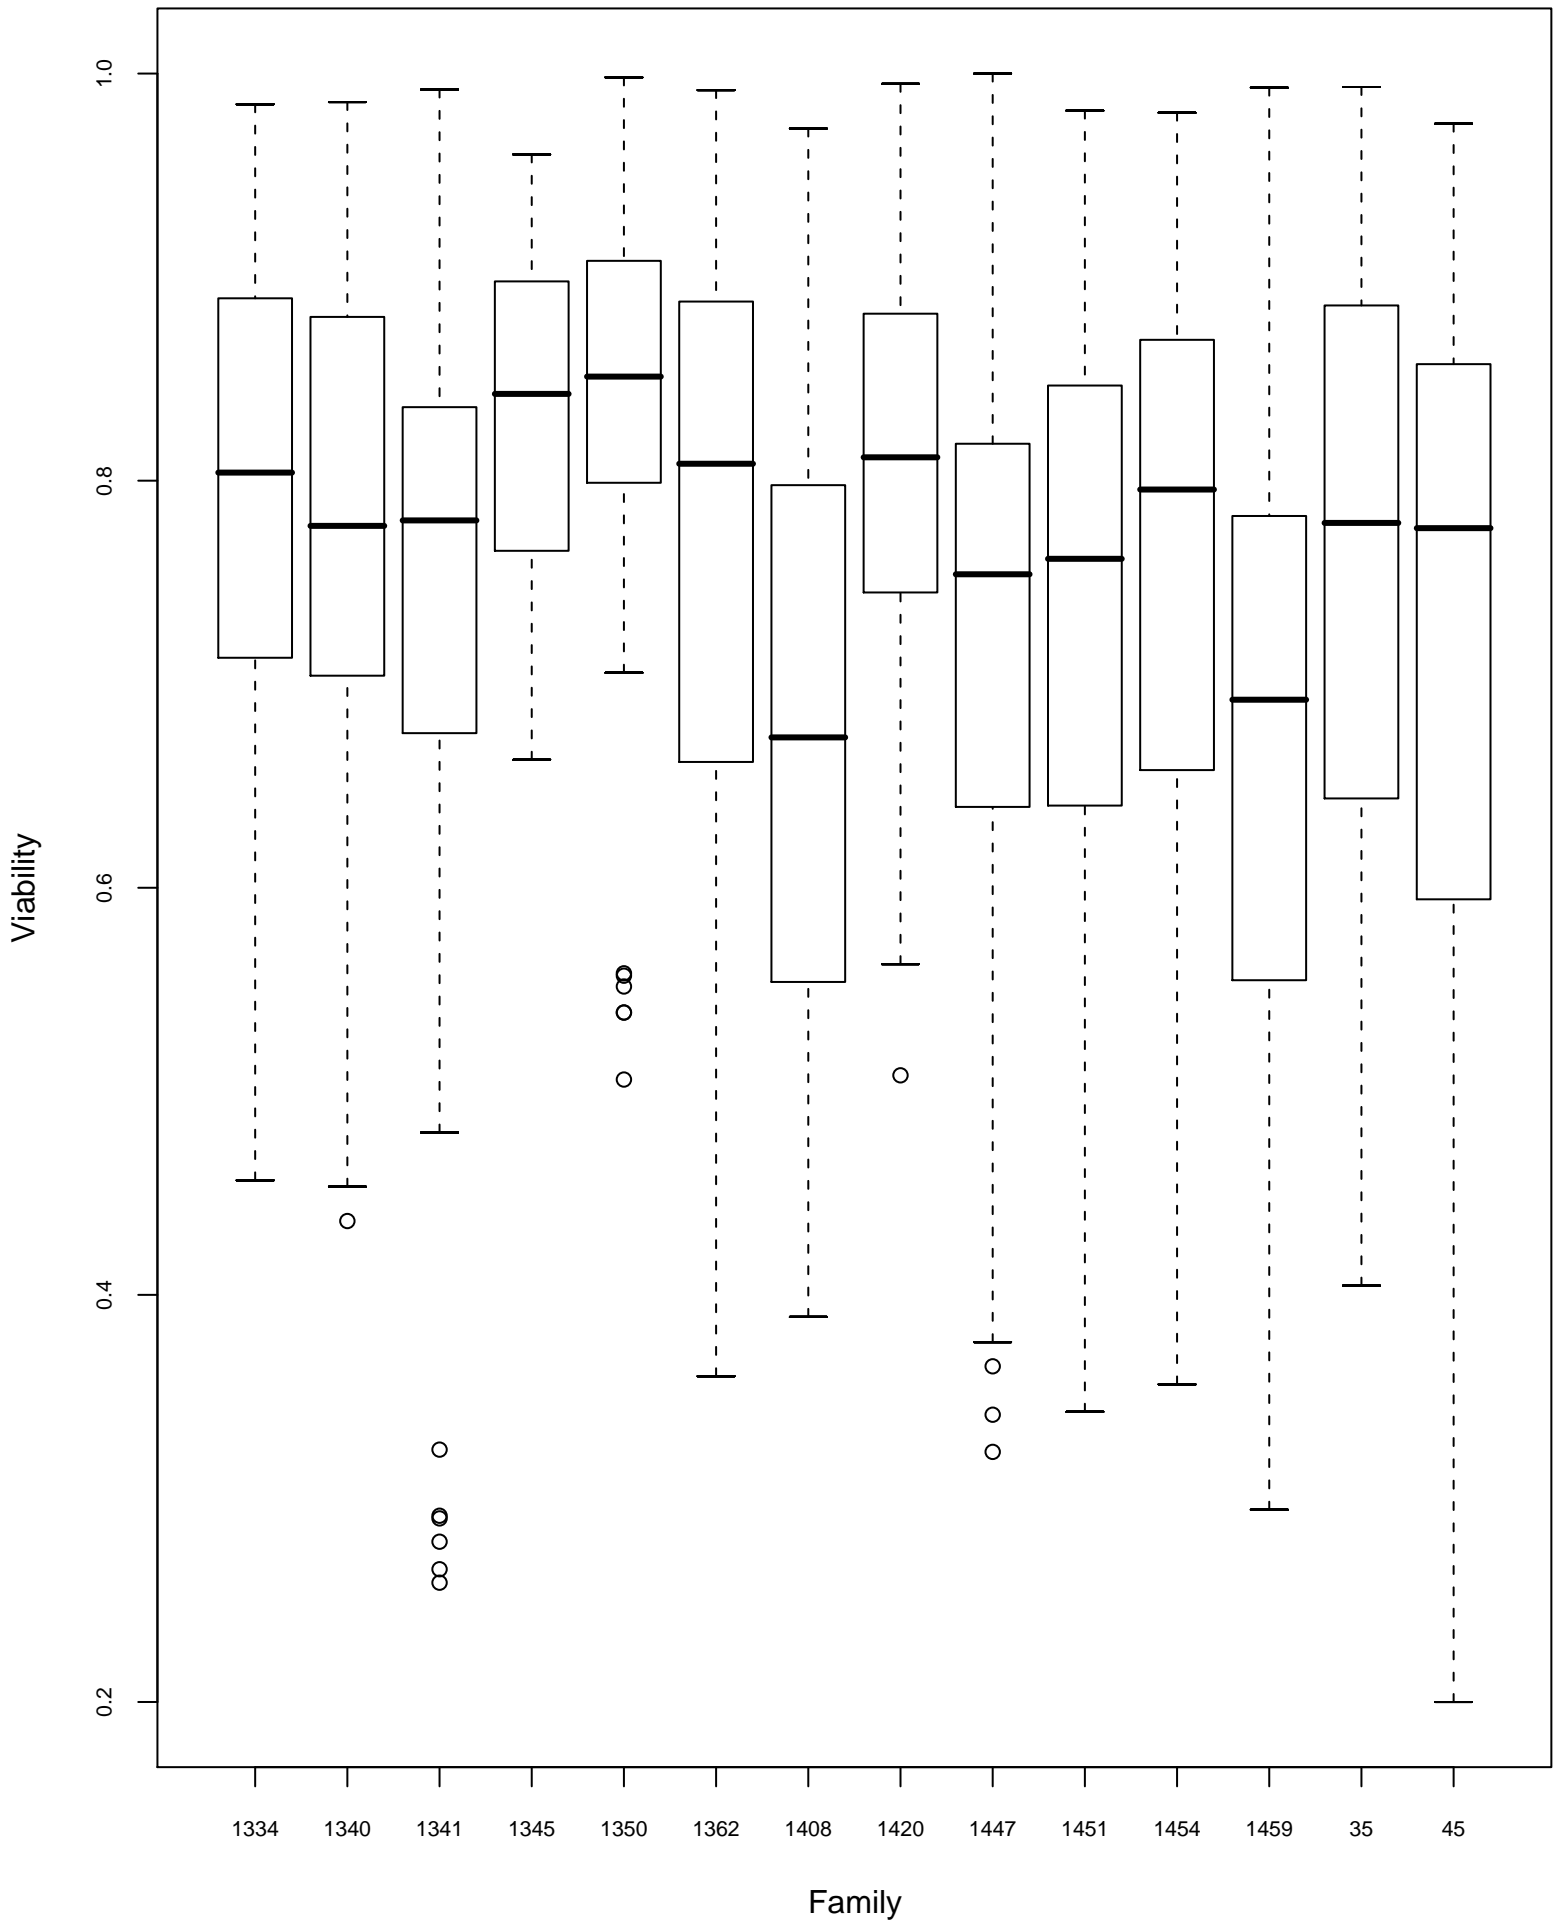

# Drug 9NC, dose 3.01e-06 (mM)

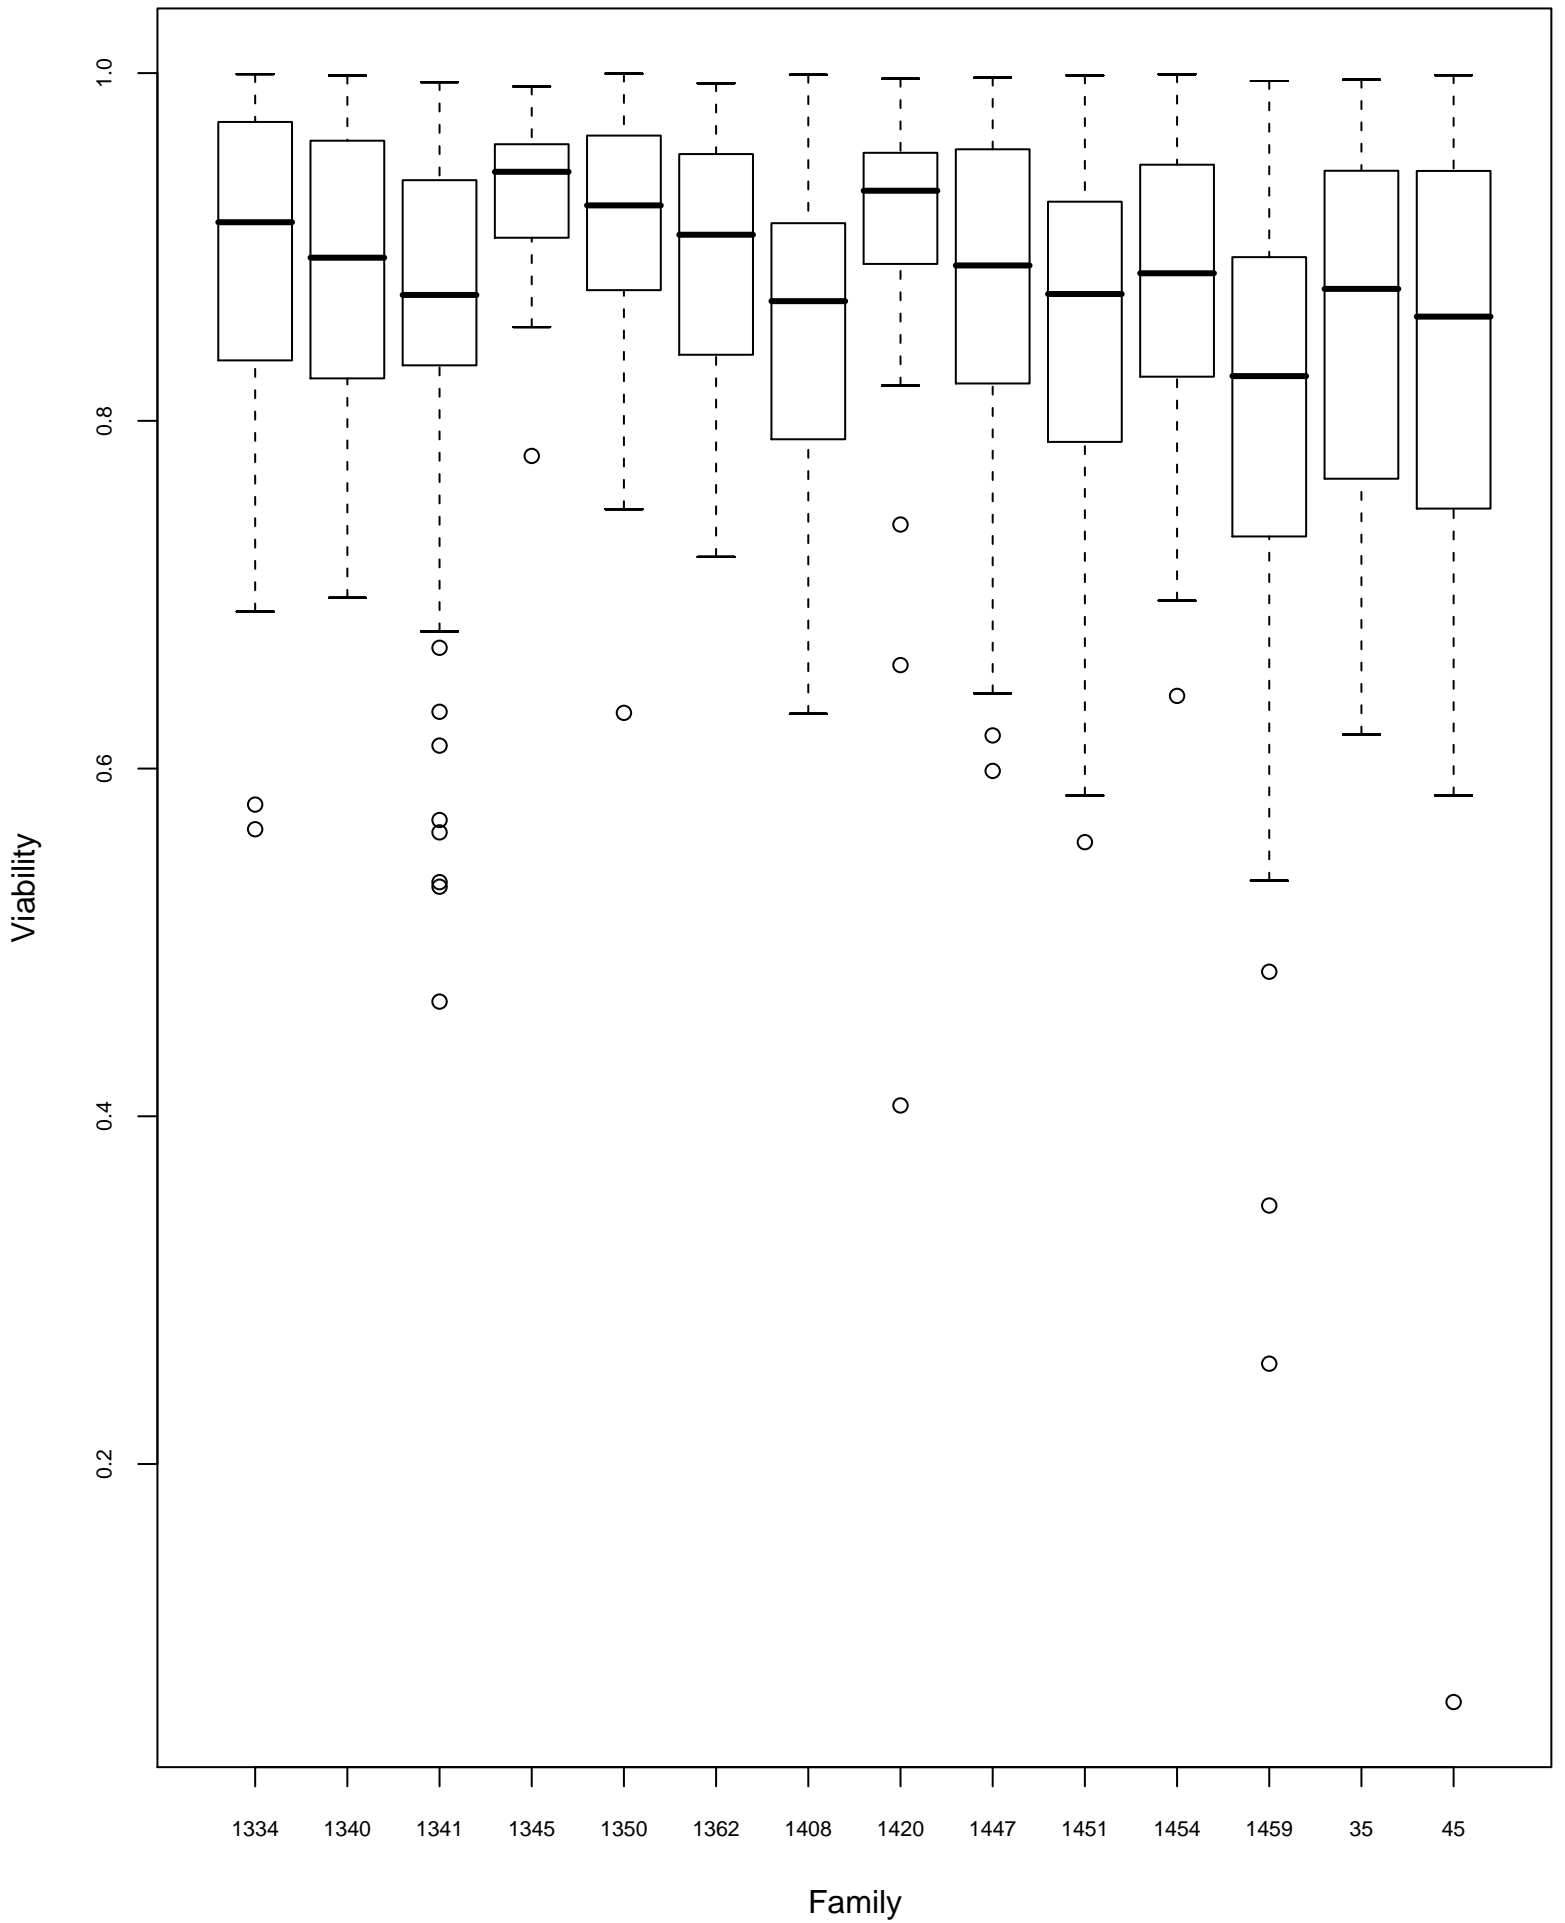



# Drug 9NC, dose 1e-07 (mM)

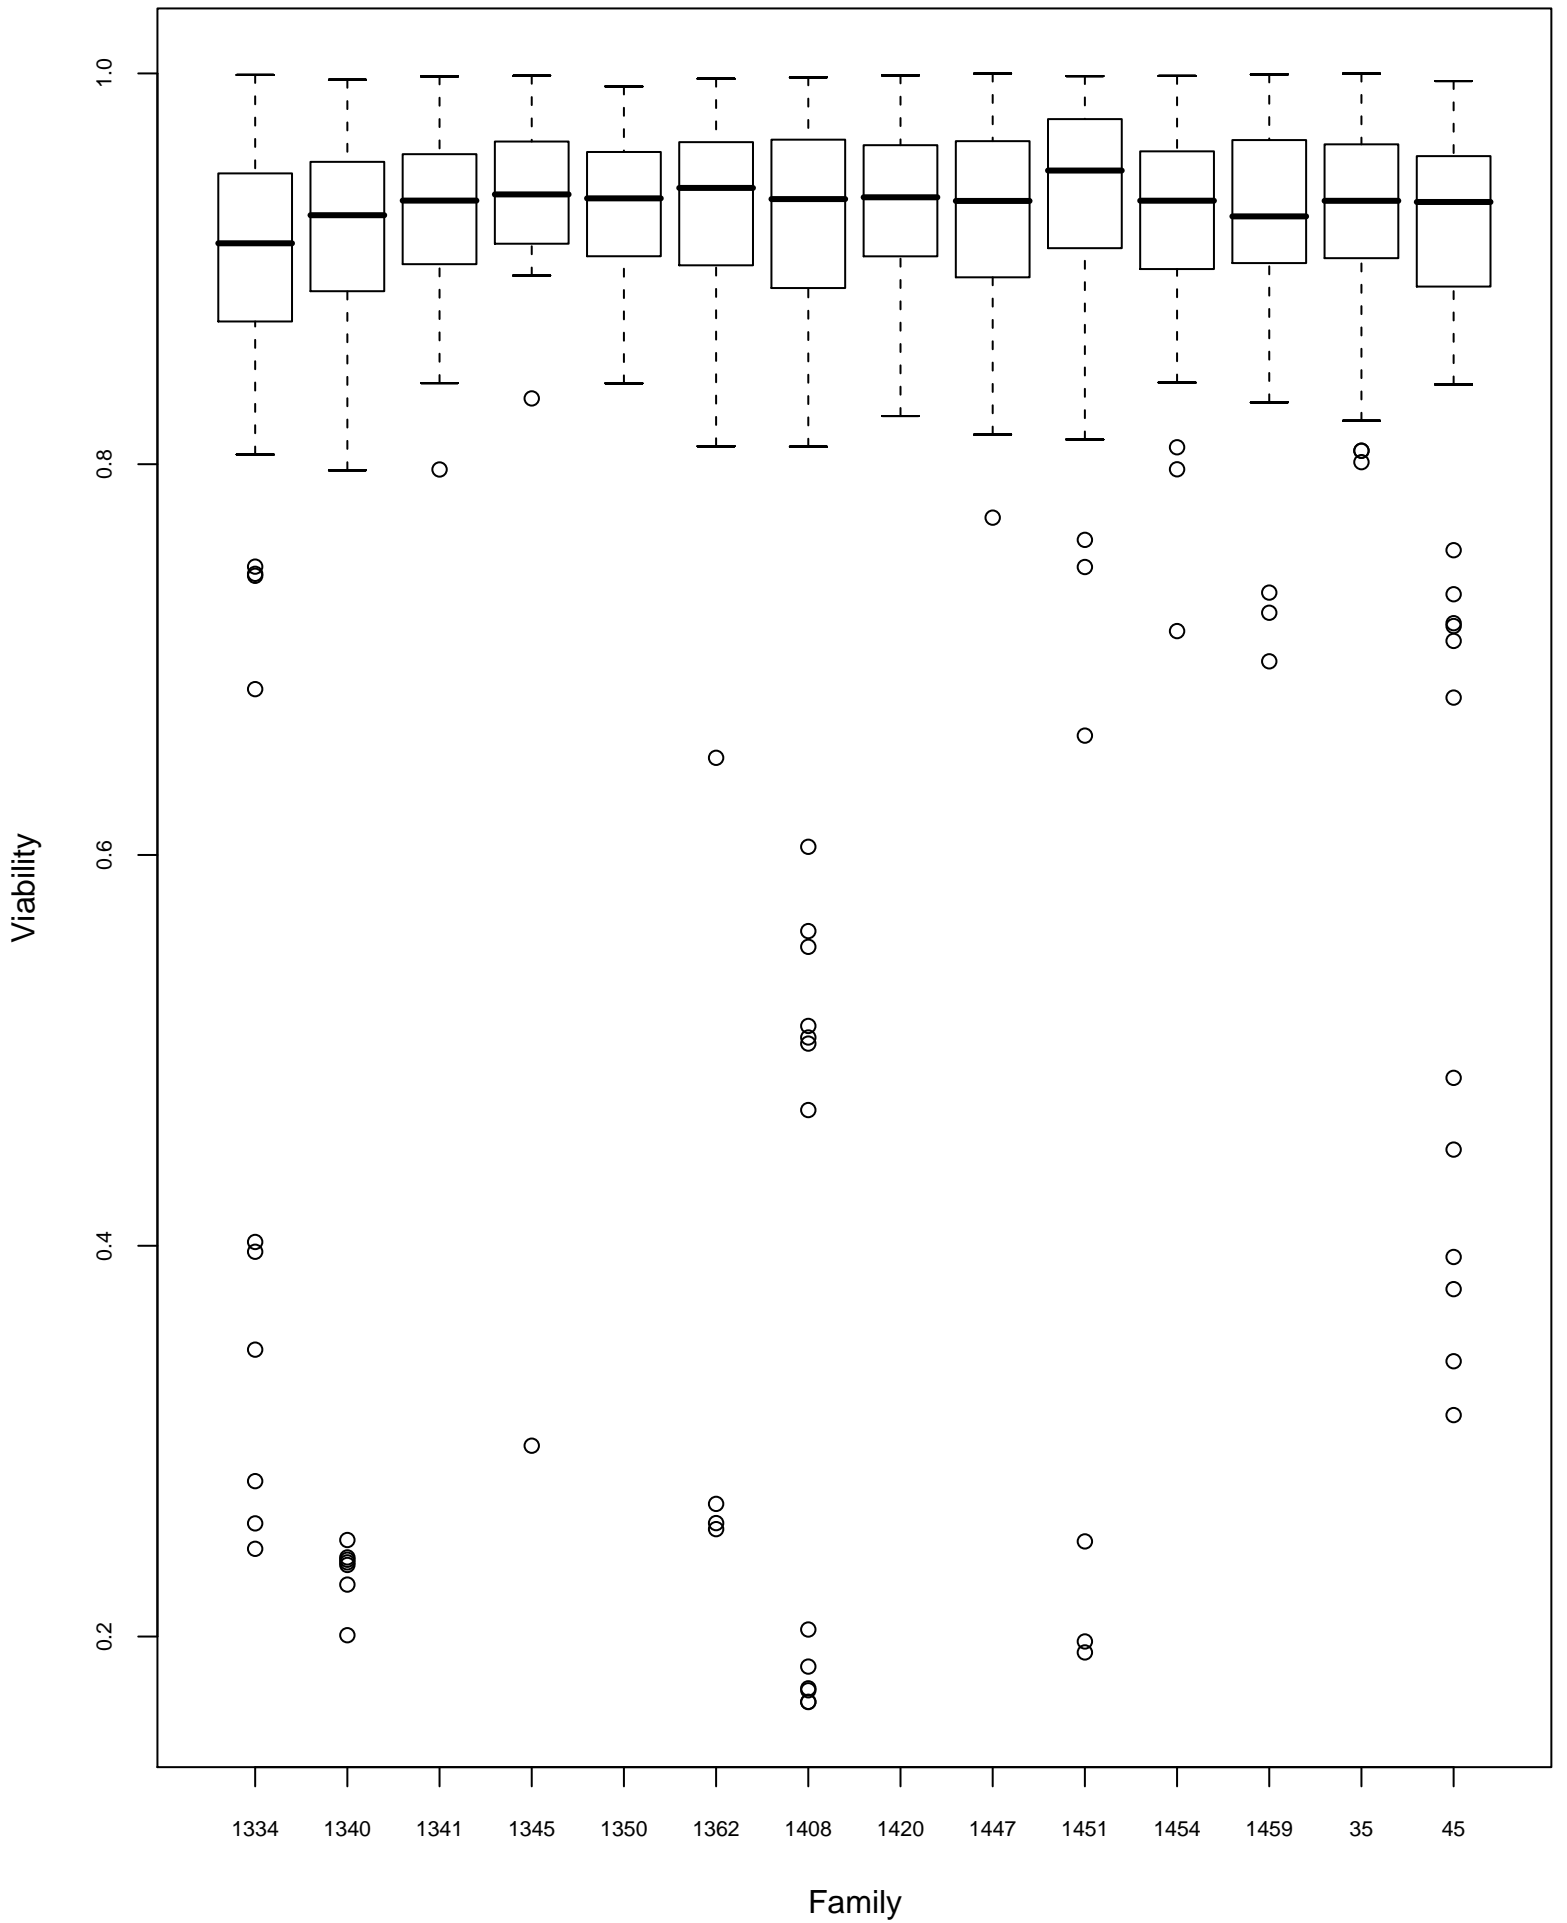

# Drug 9NC, dose 1e-08 (mM)

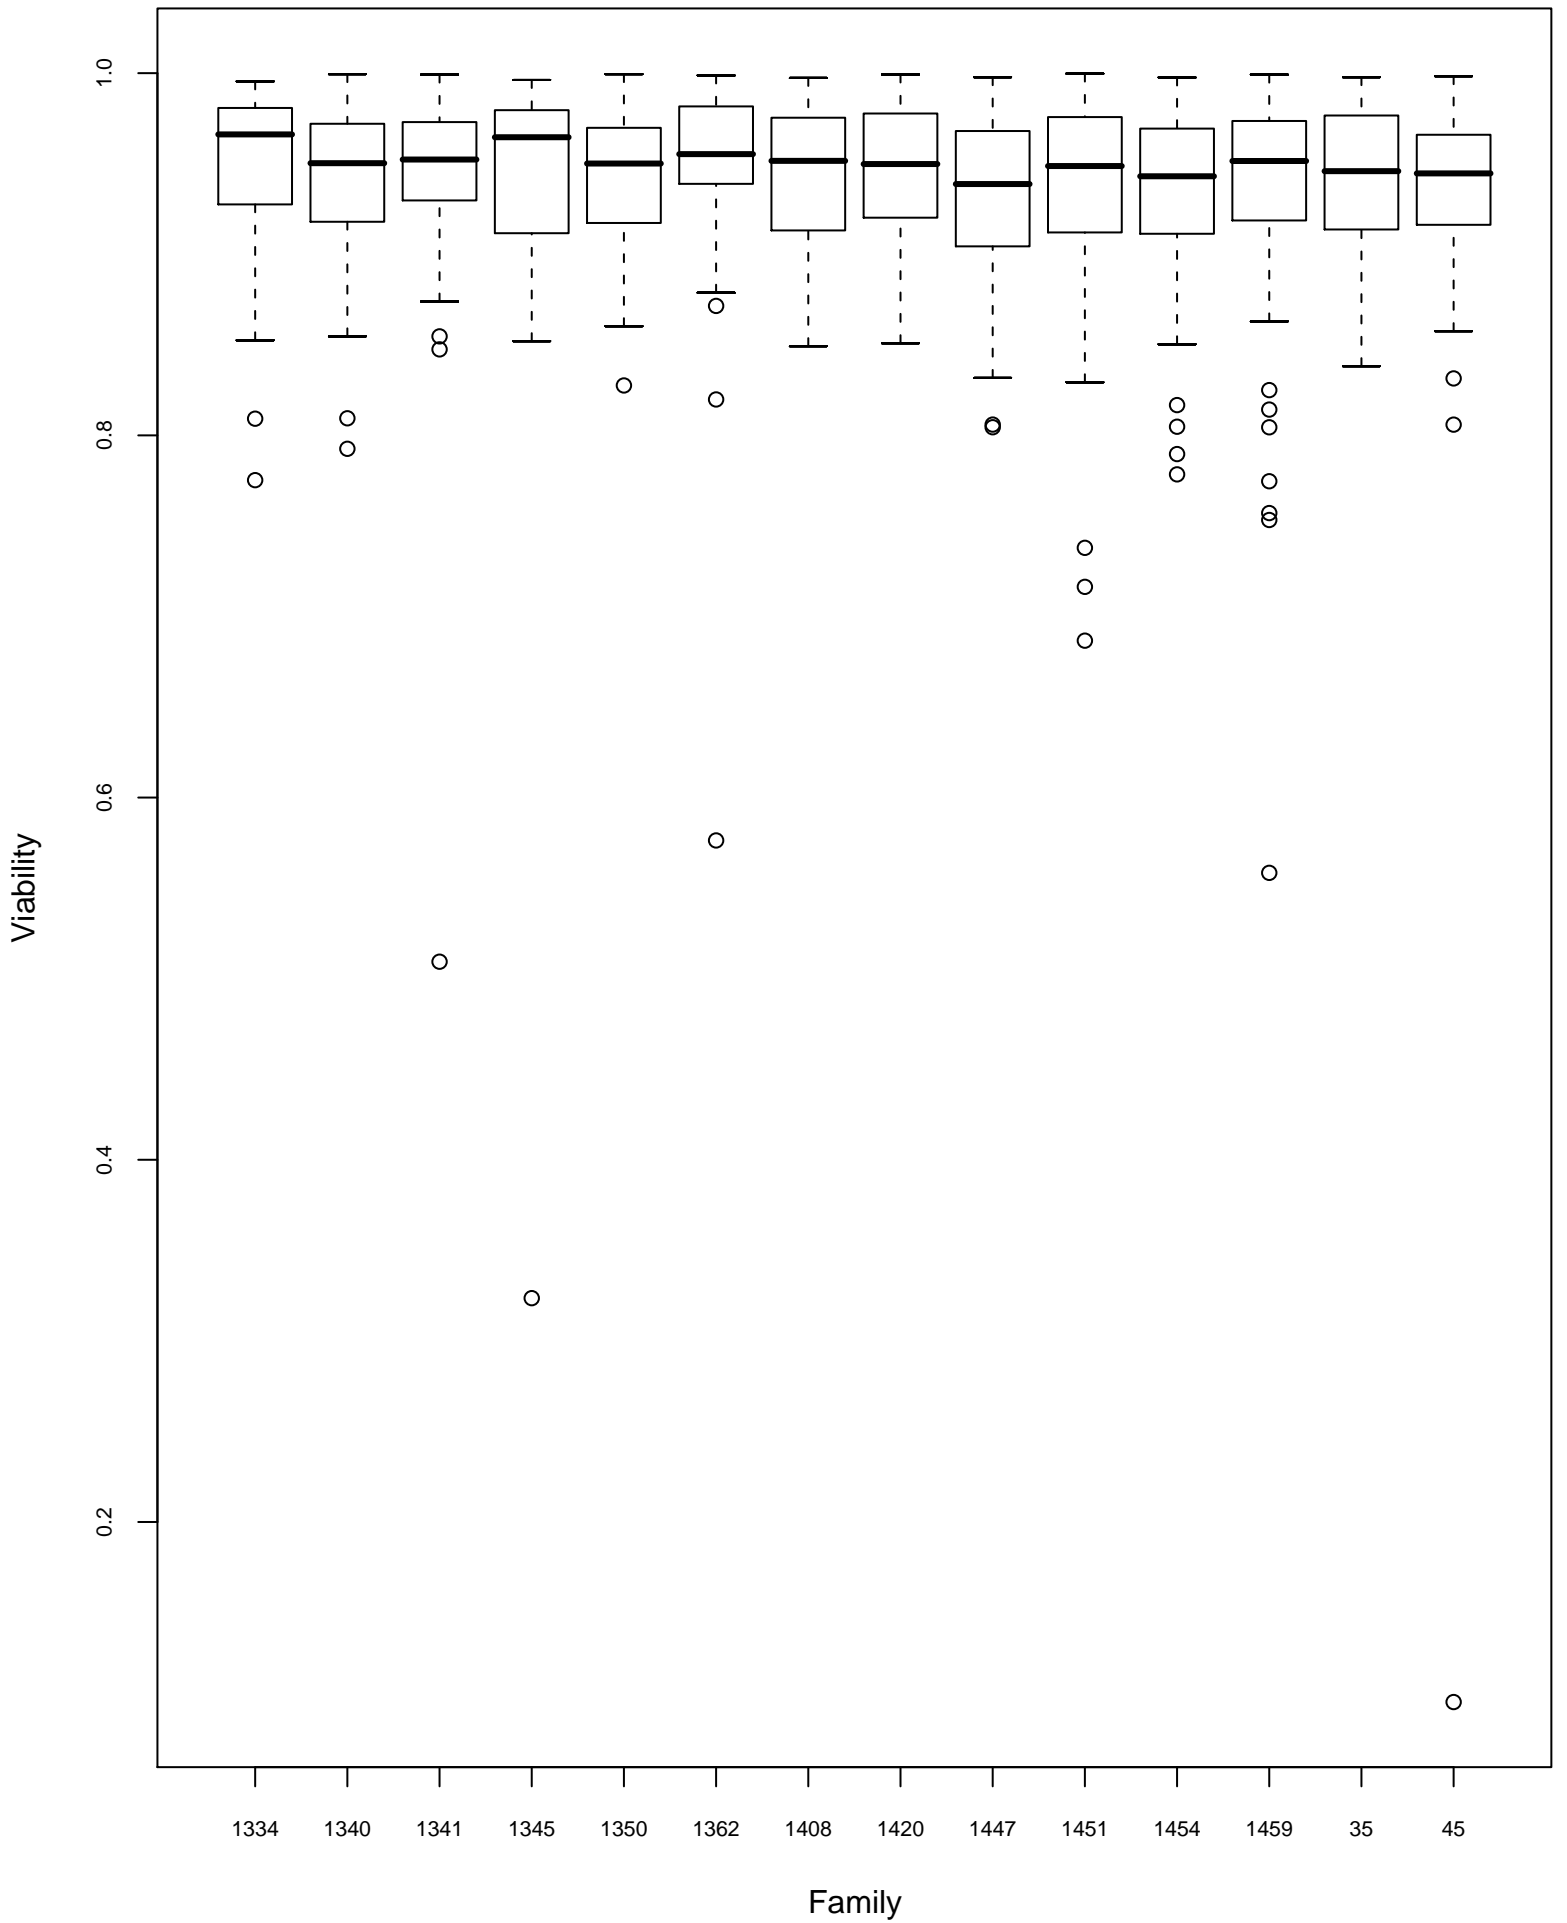

# Drug CPT, dose 0.01 (mM)

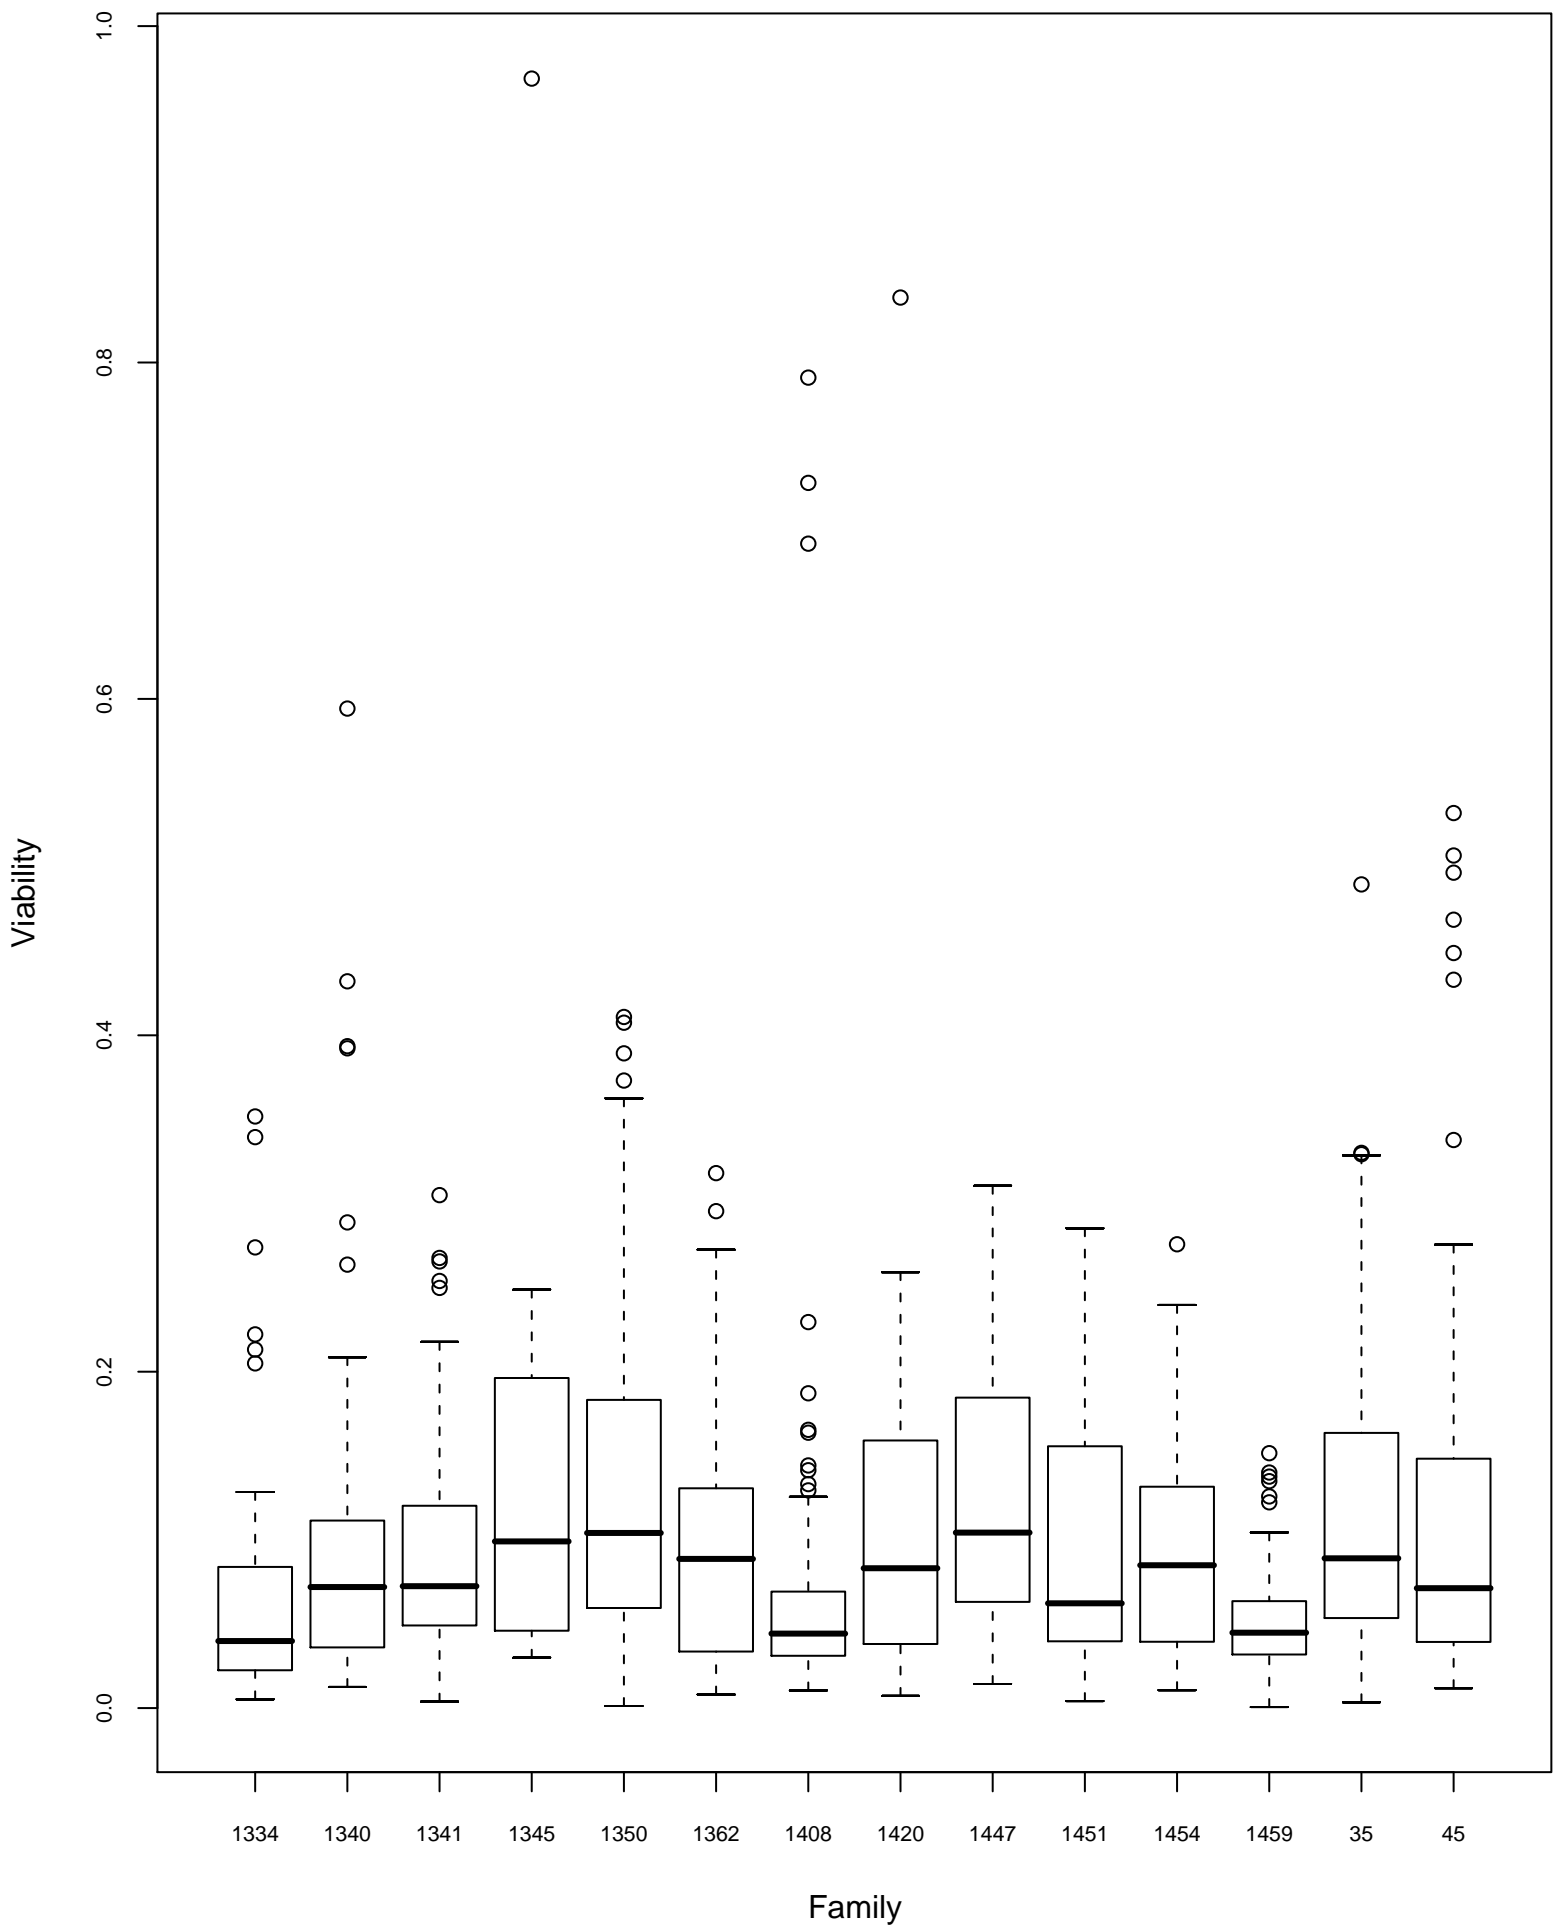

# Drug CPT, dose 0.002 (mM)

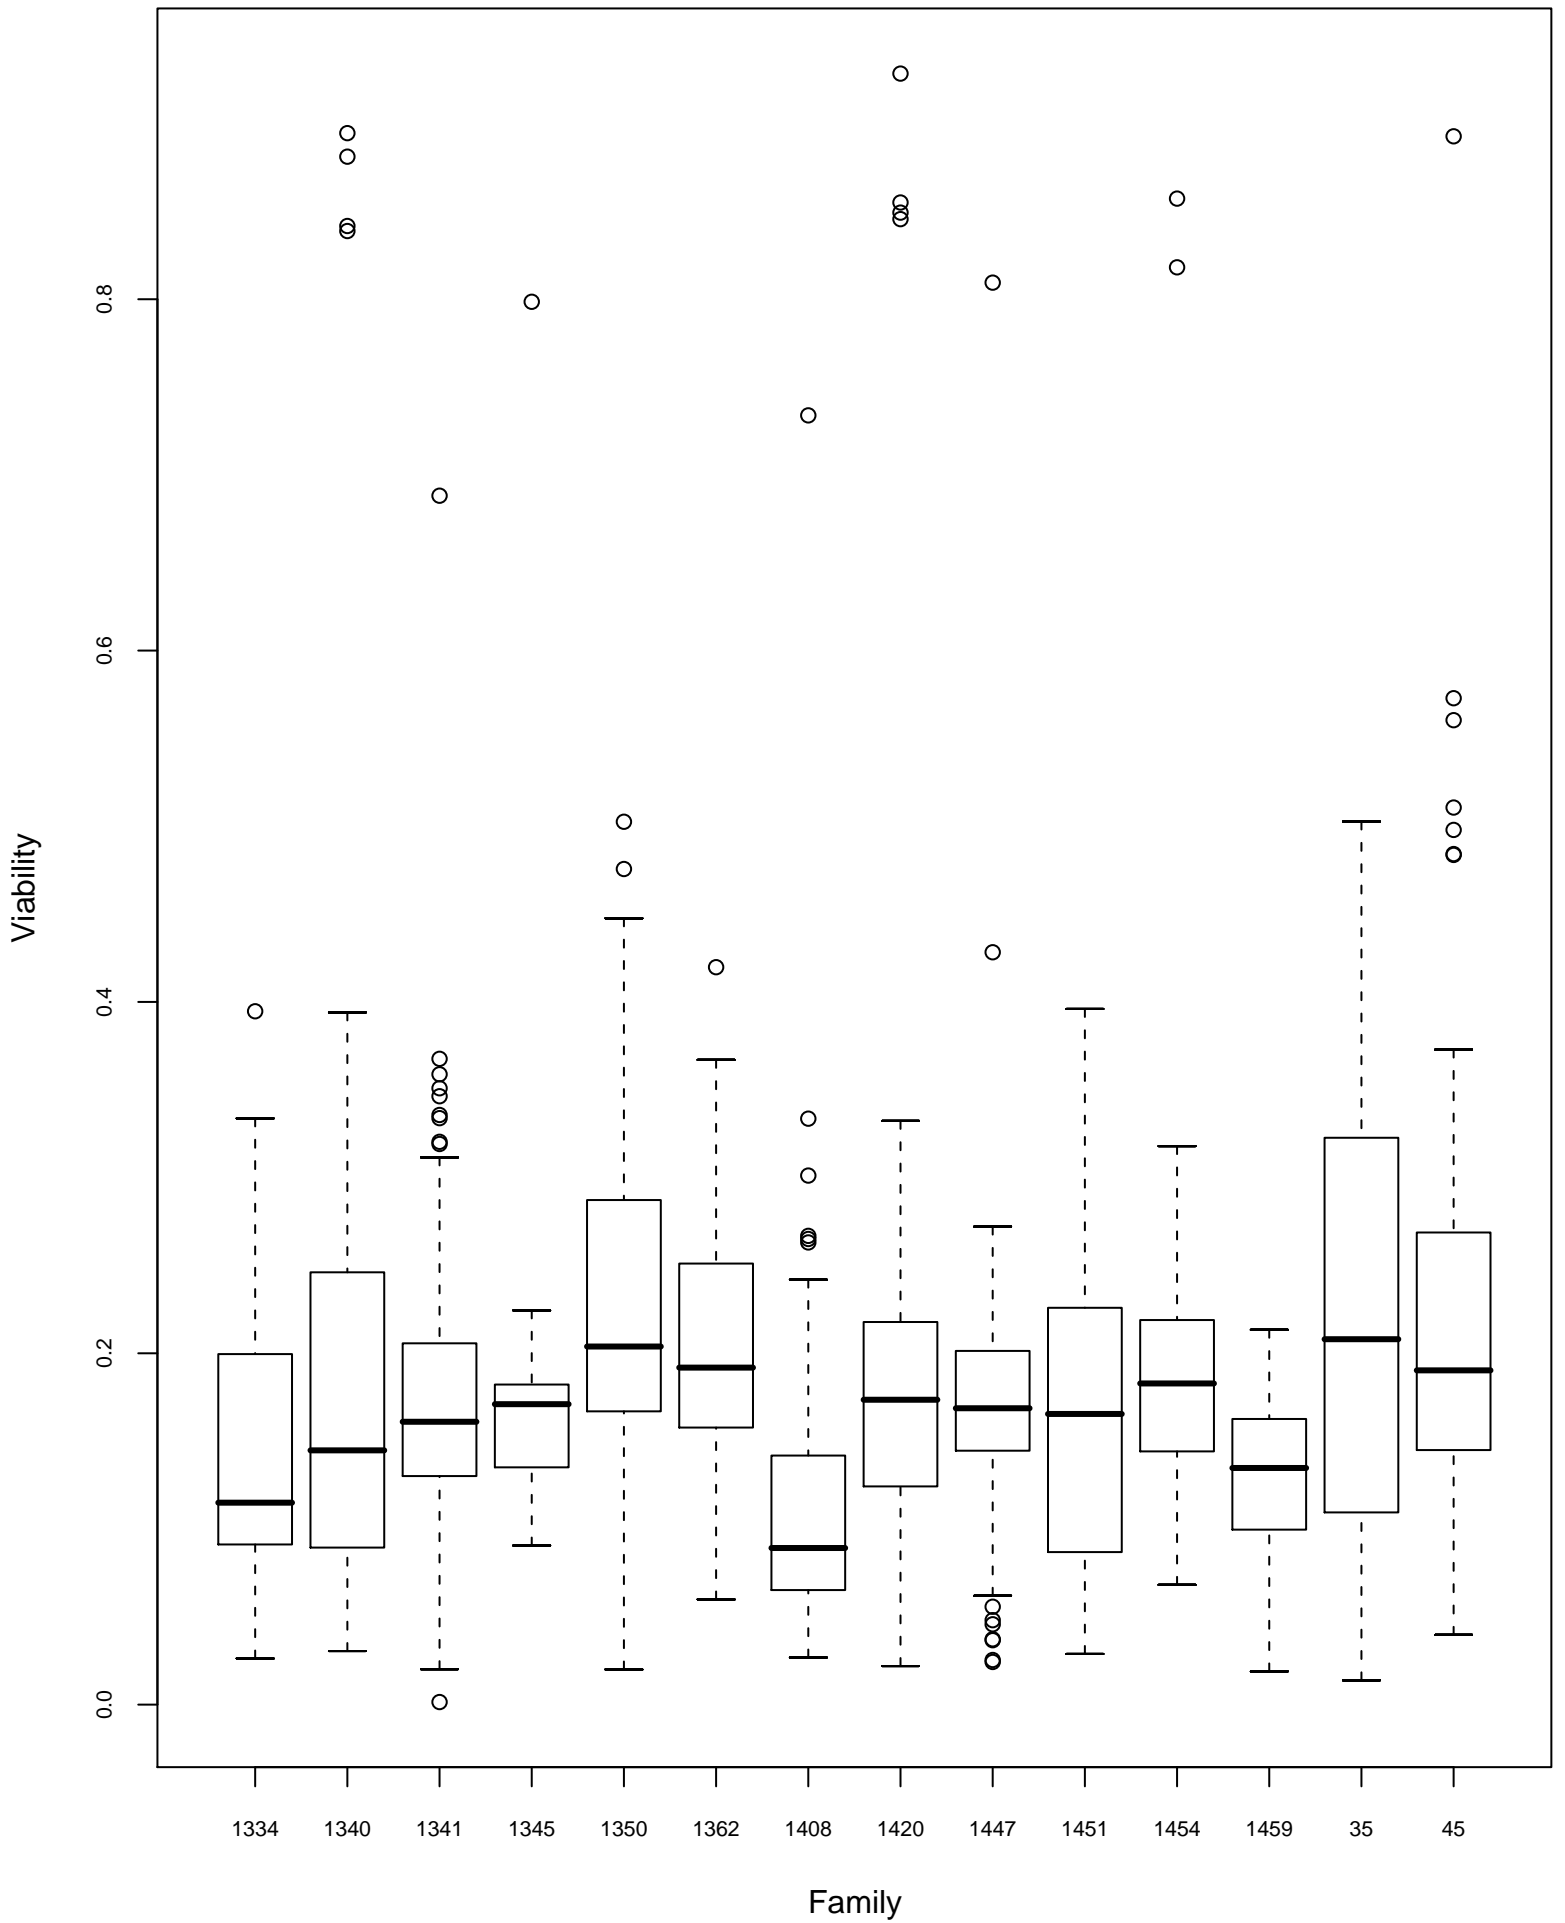

# Drug CPT, dose 8e-05 (mM)

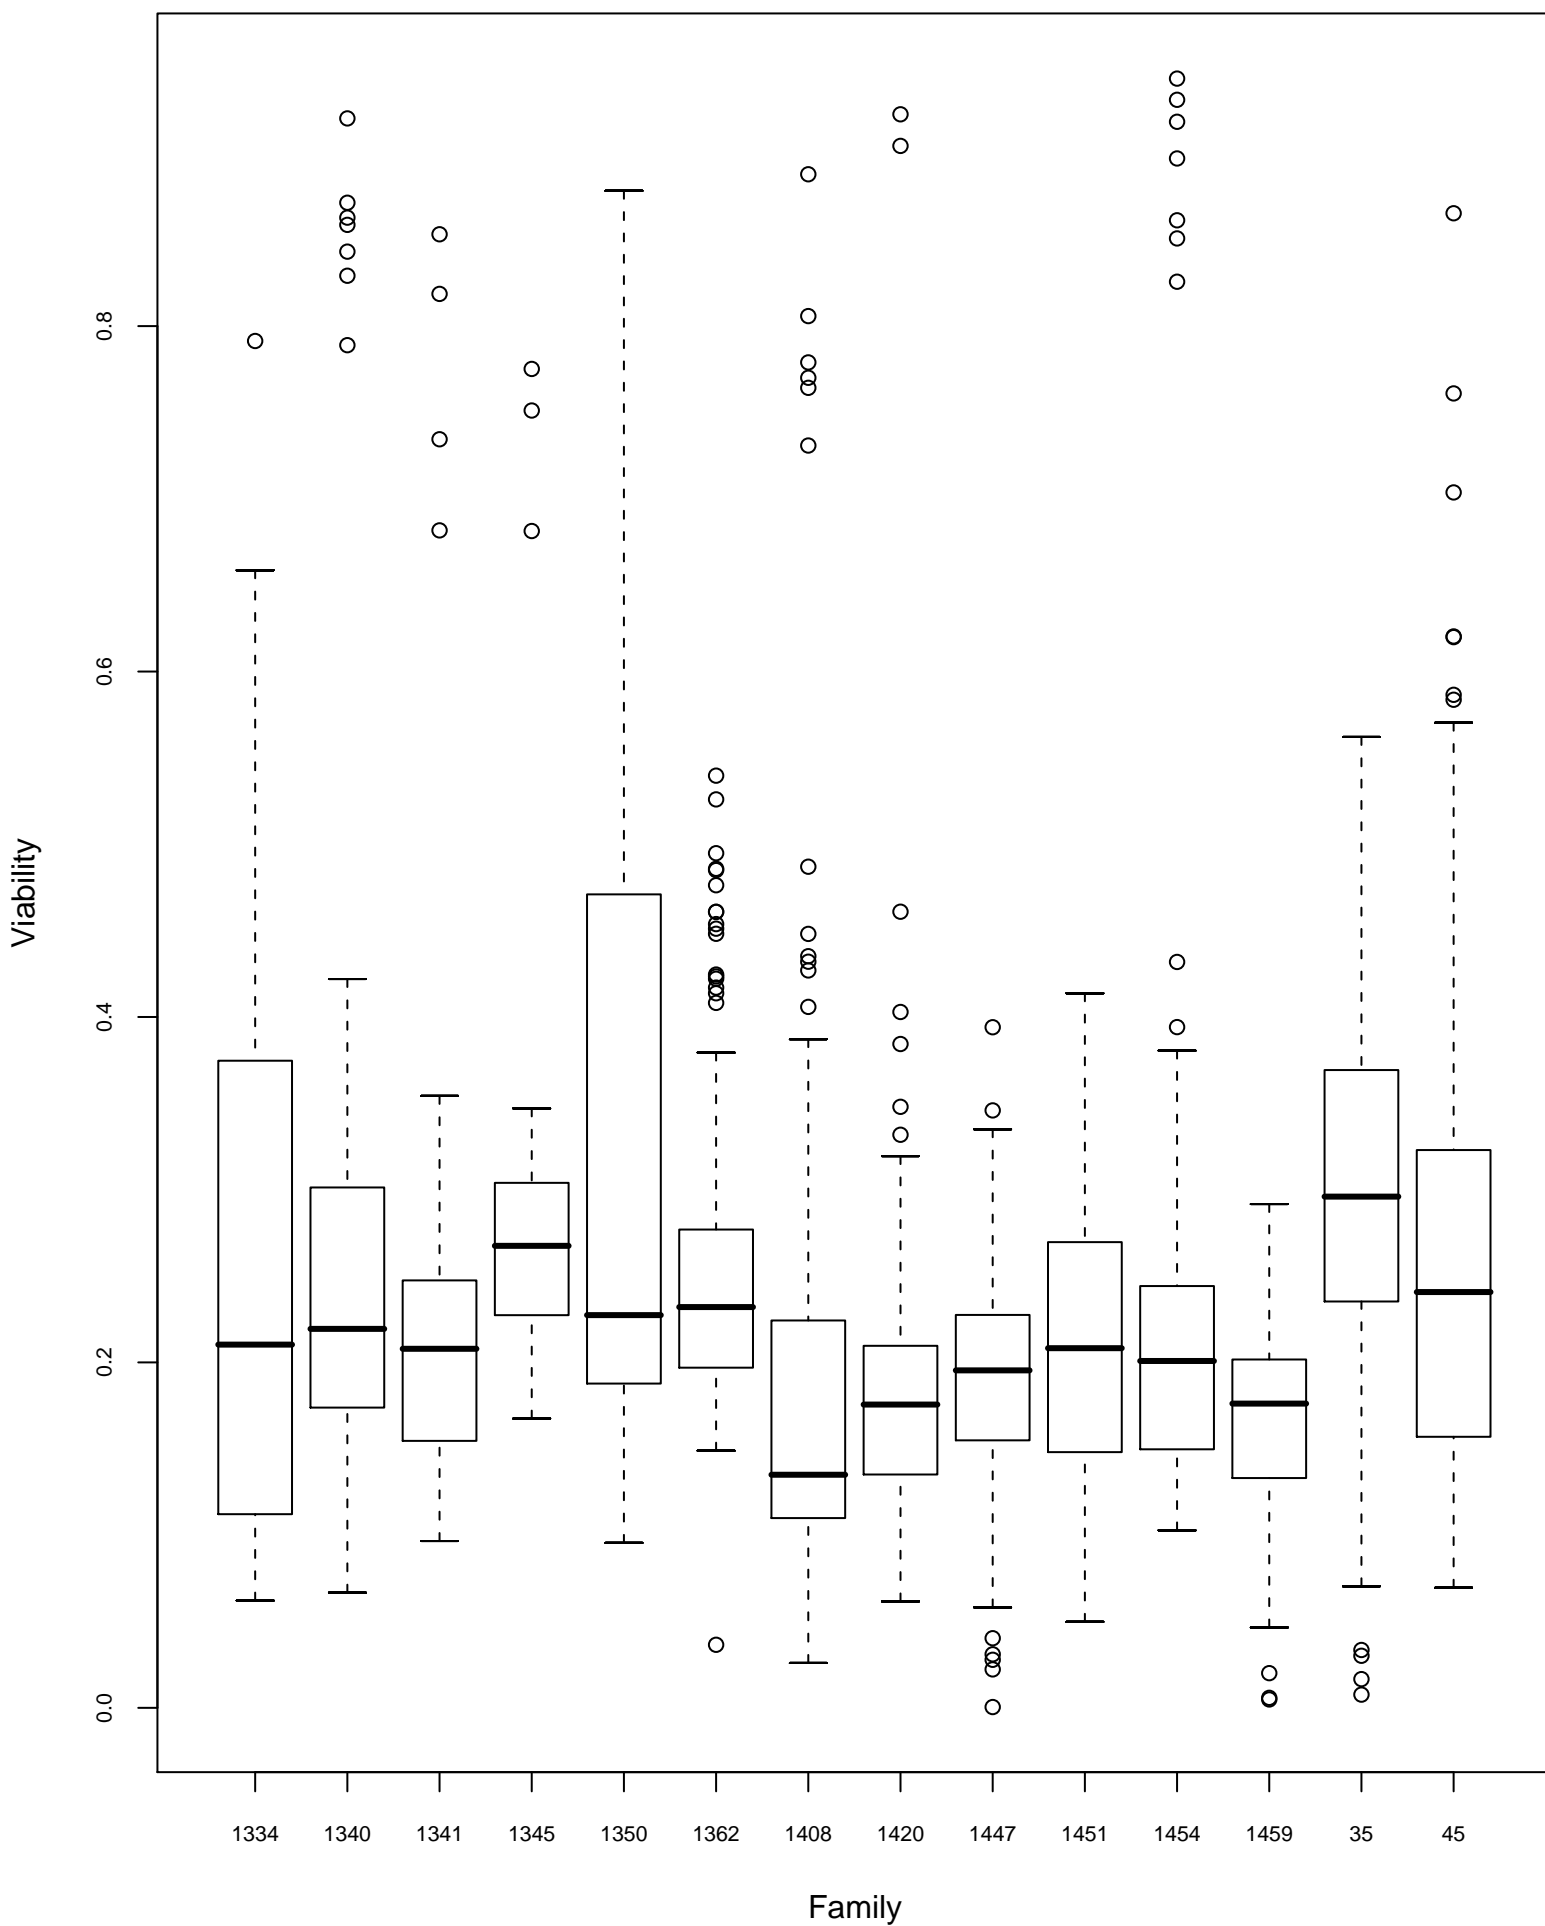

# Drug CPT, dose 1.5e-05 (mM)

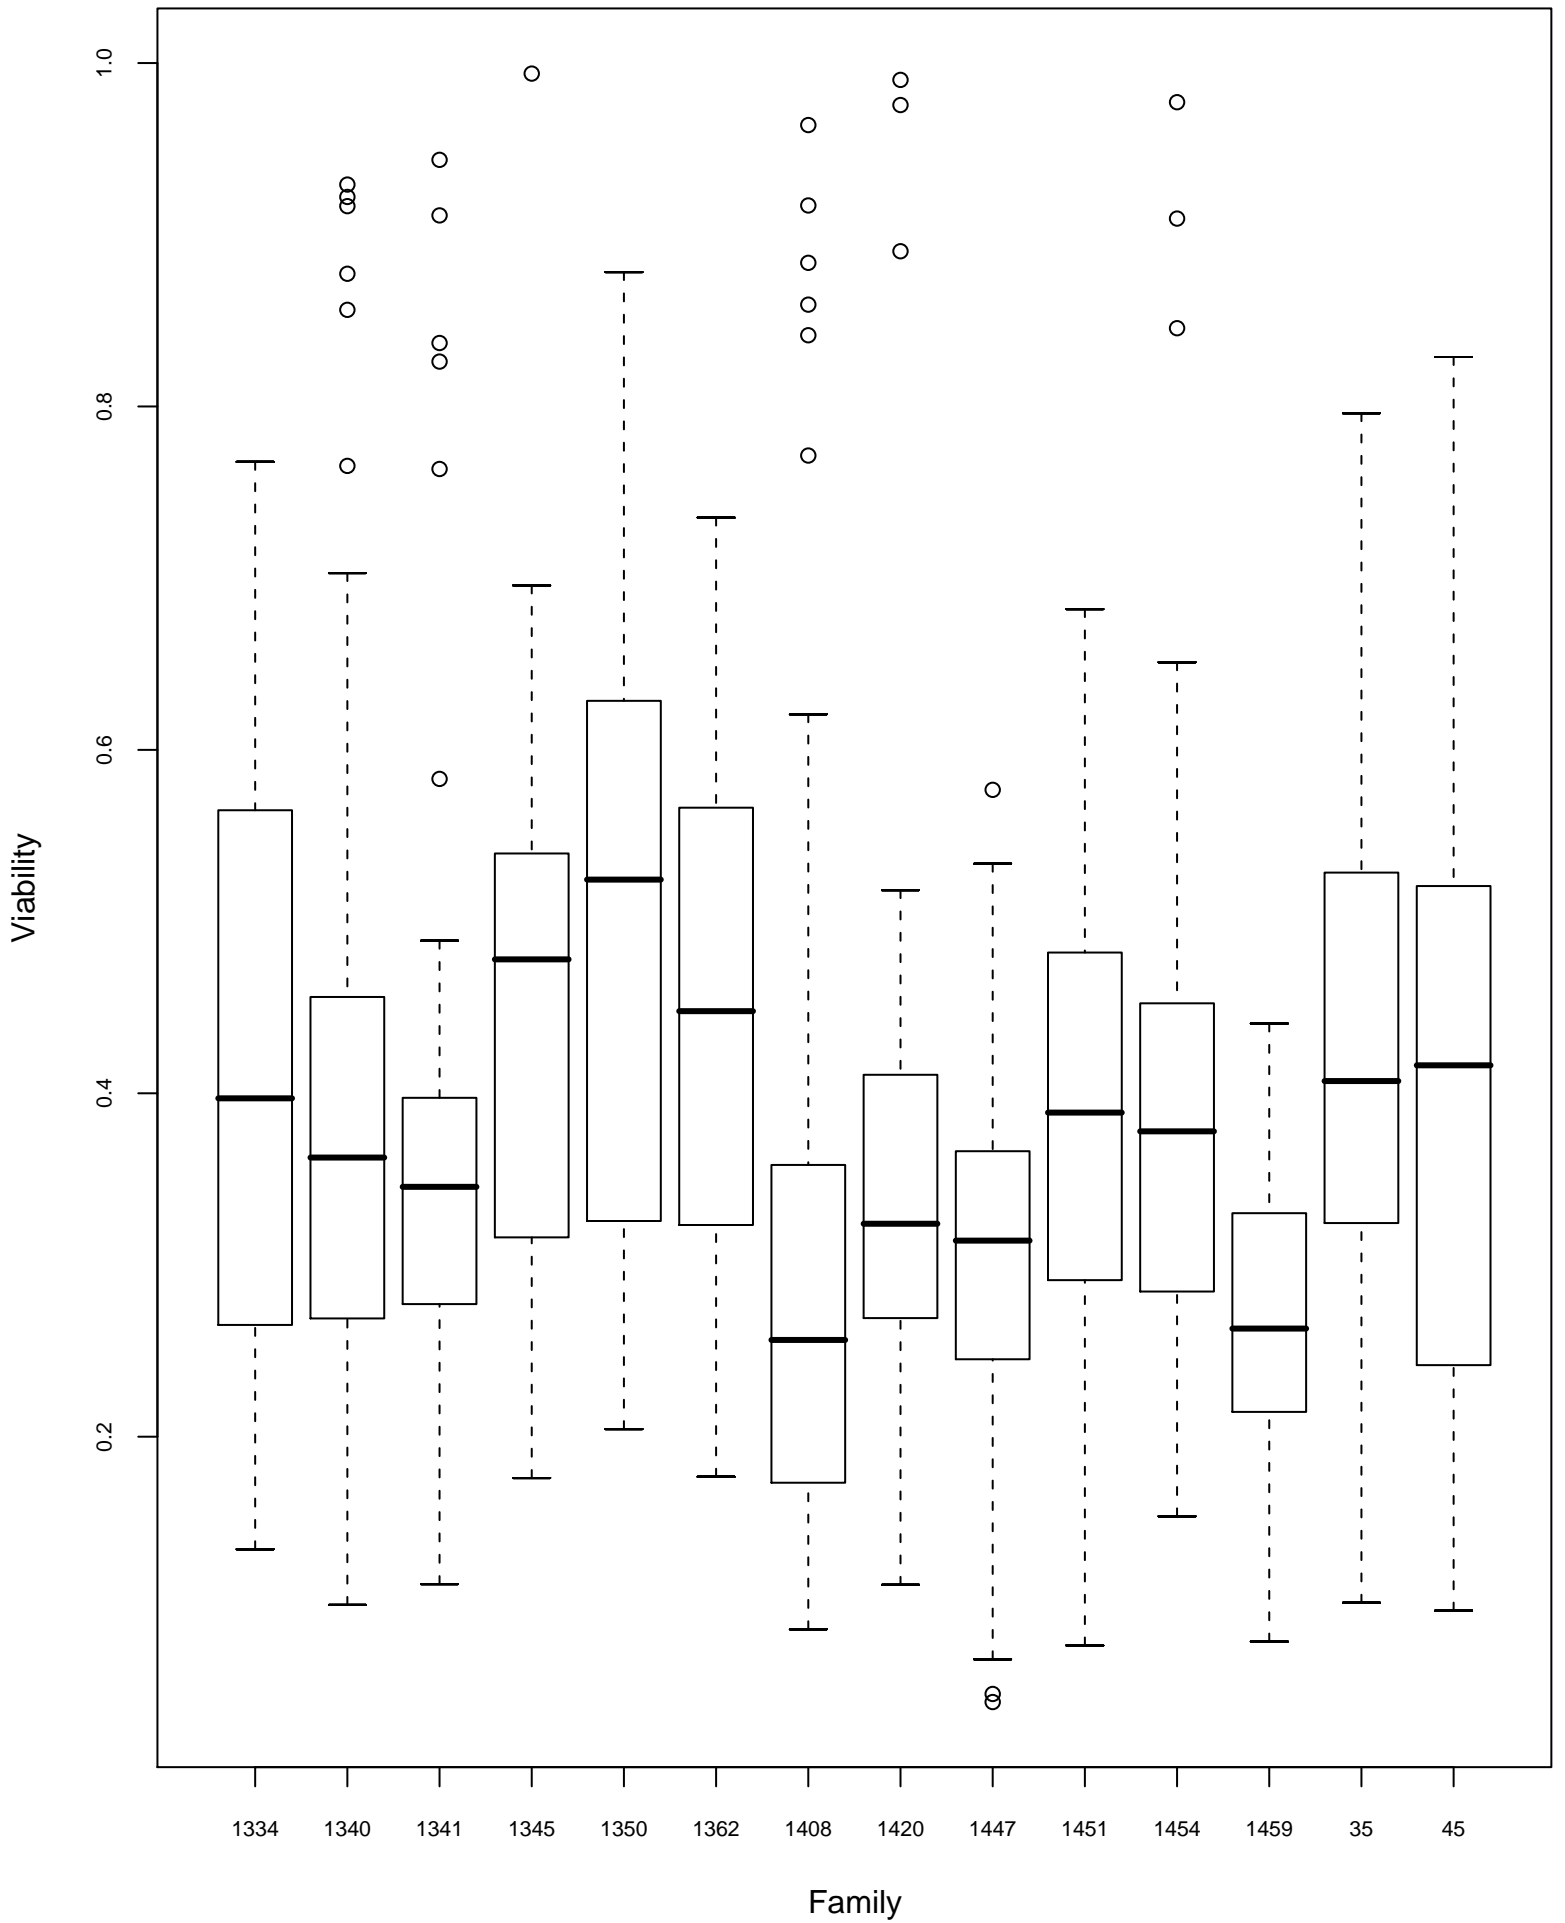

# Drug CPT, dose 8e-06 (mM)

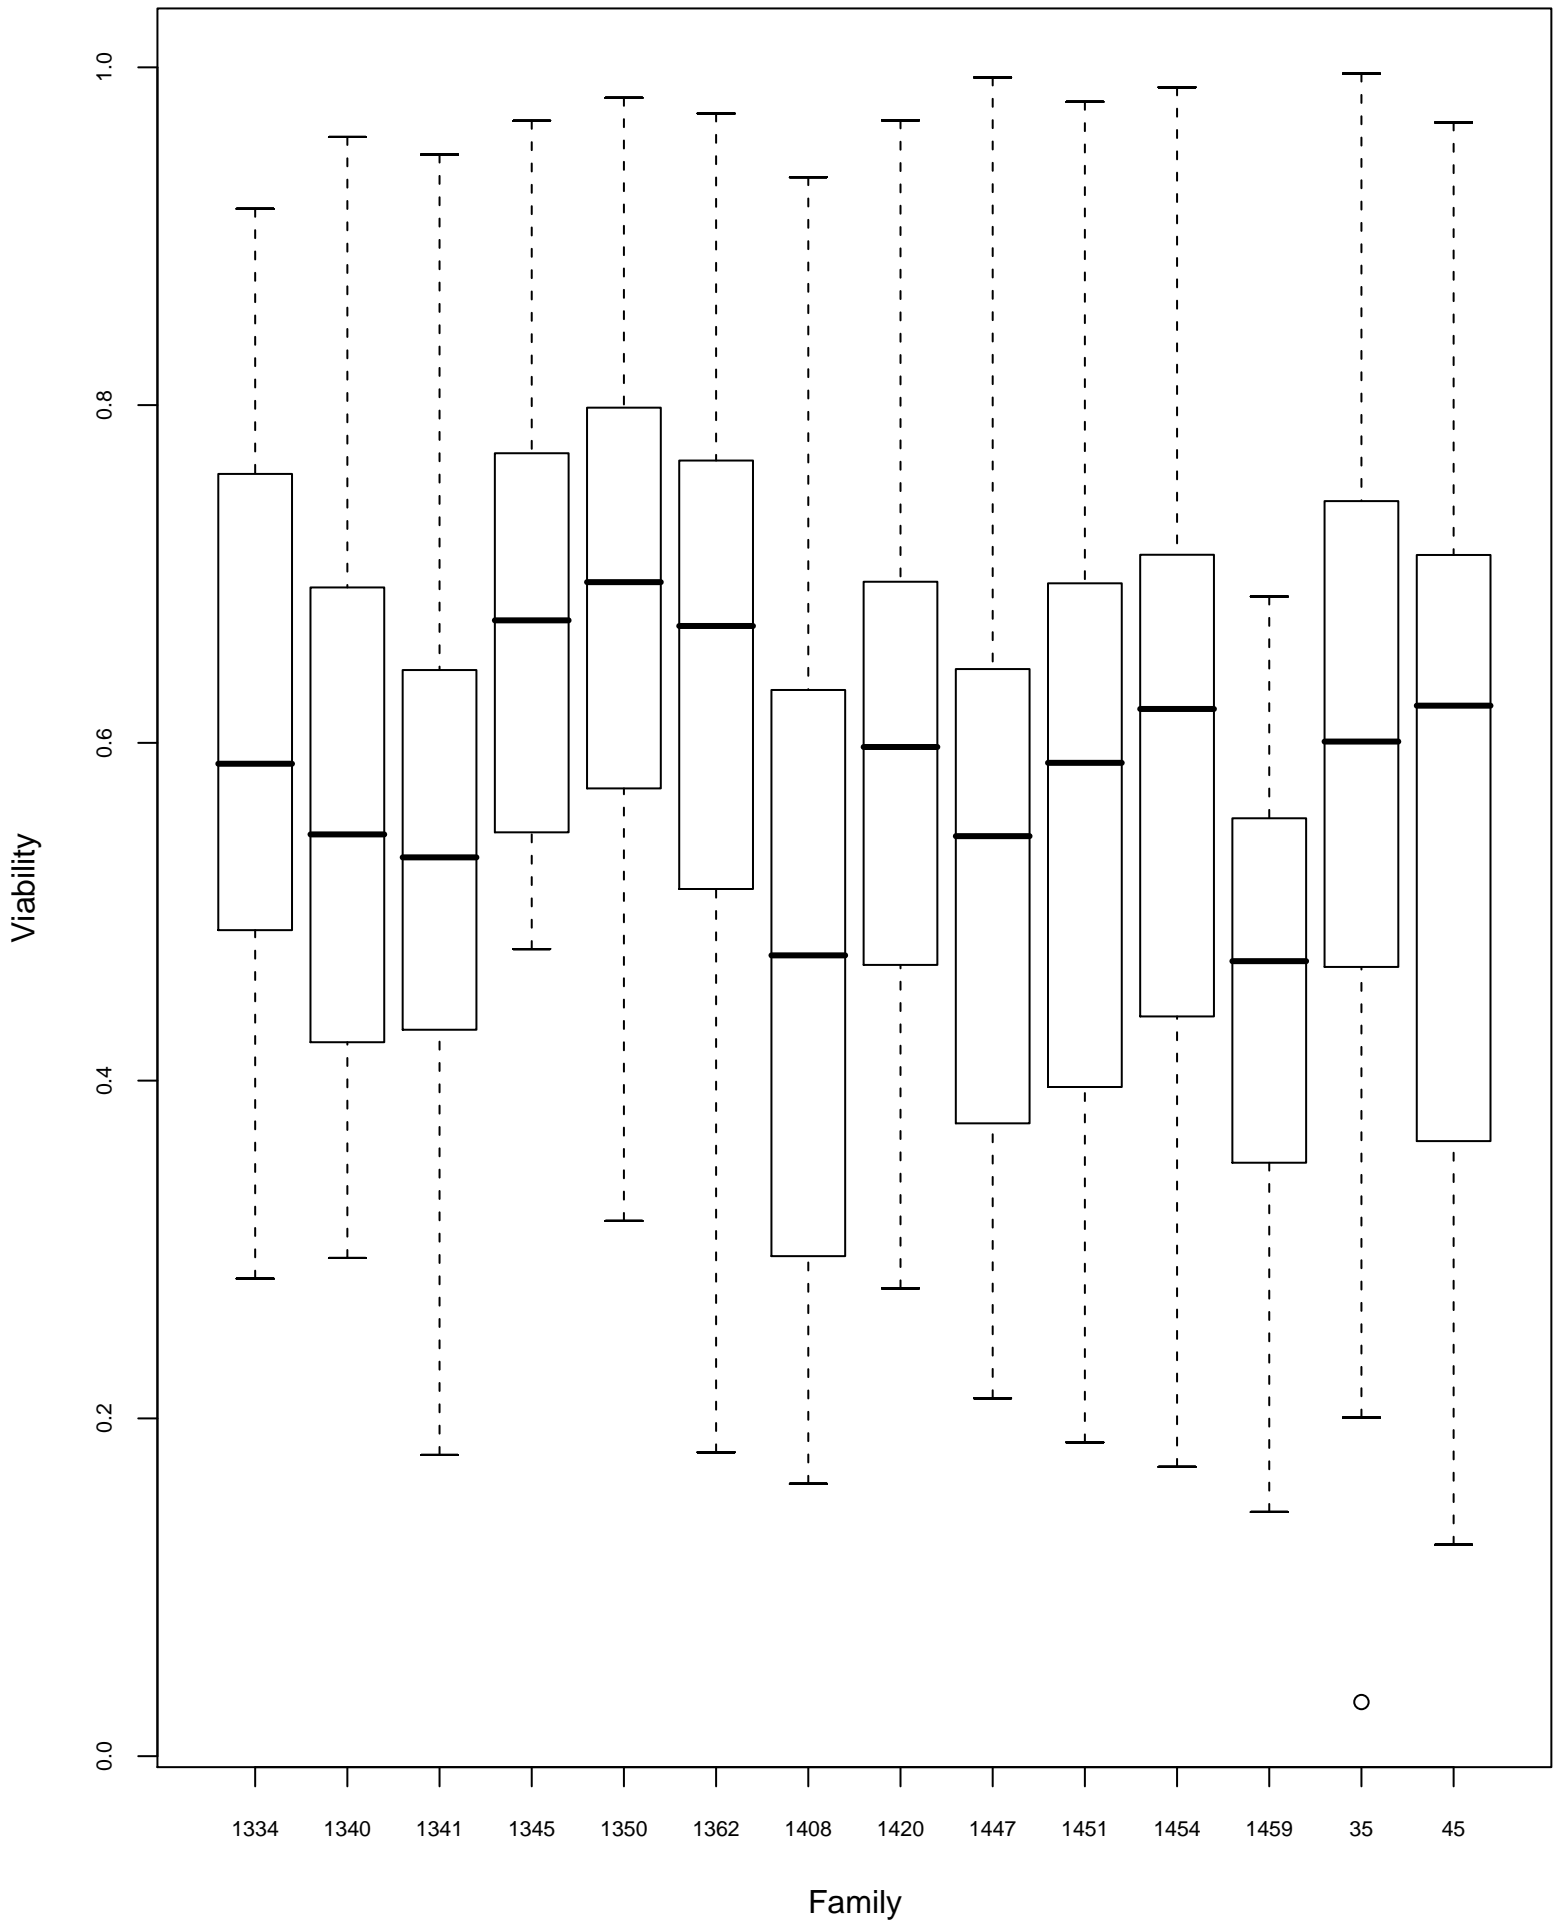

# Drug CPT, dose 3.01e-06 (mM)

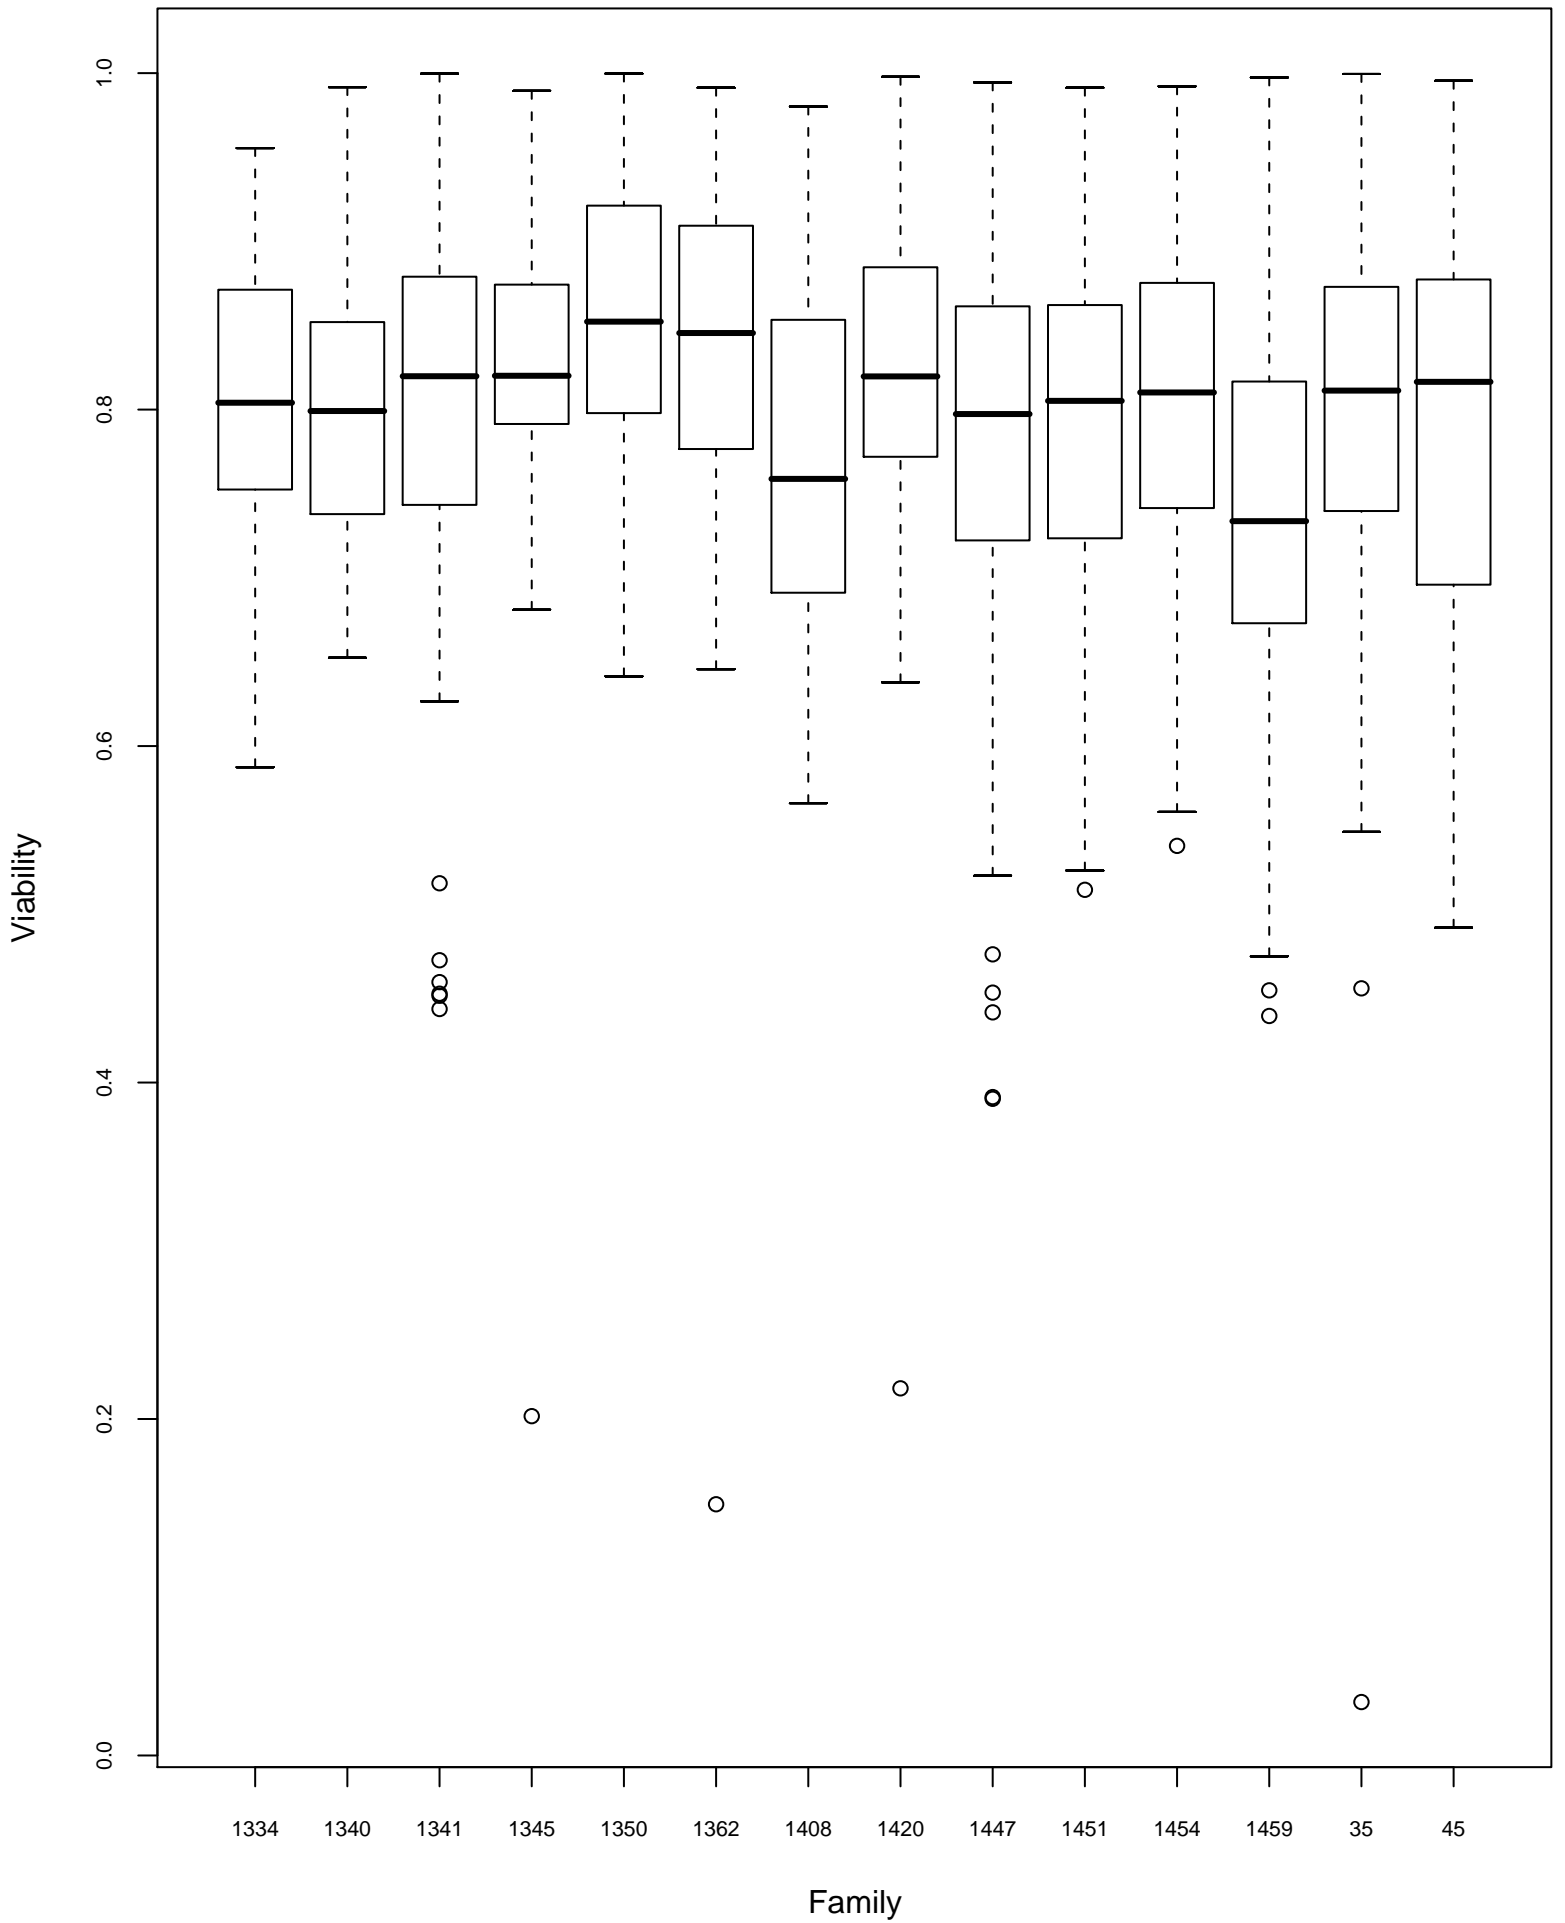



# Drug CPT, dose 2e-06 (mM)

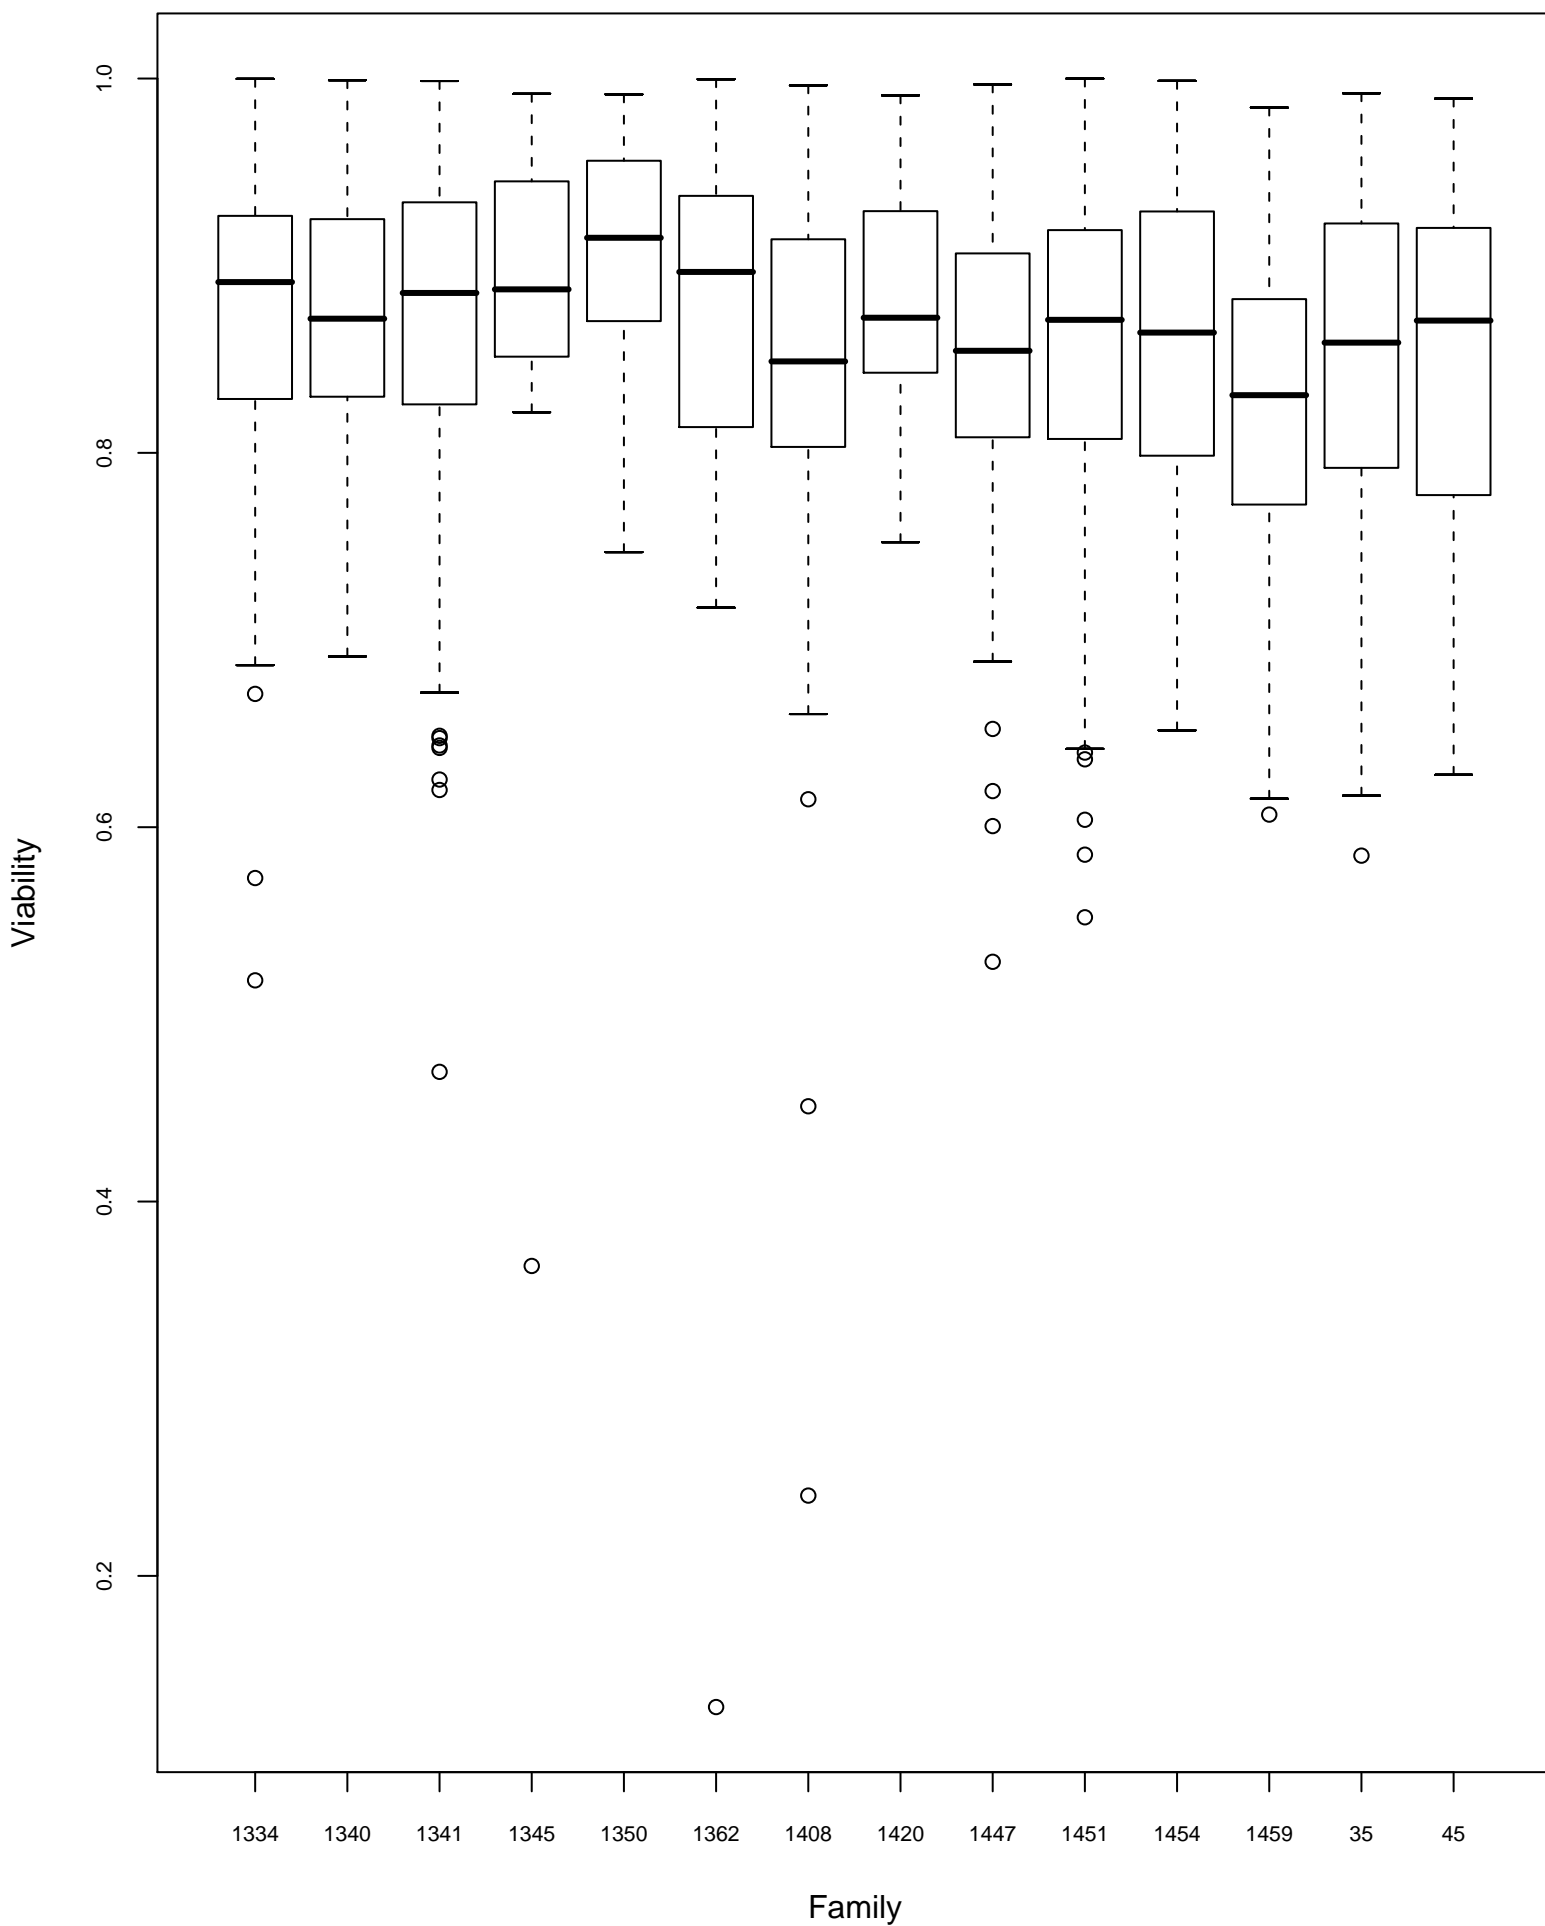

# Drug CPT, dose 1e-07 (mM)

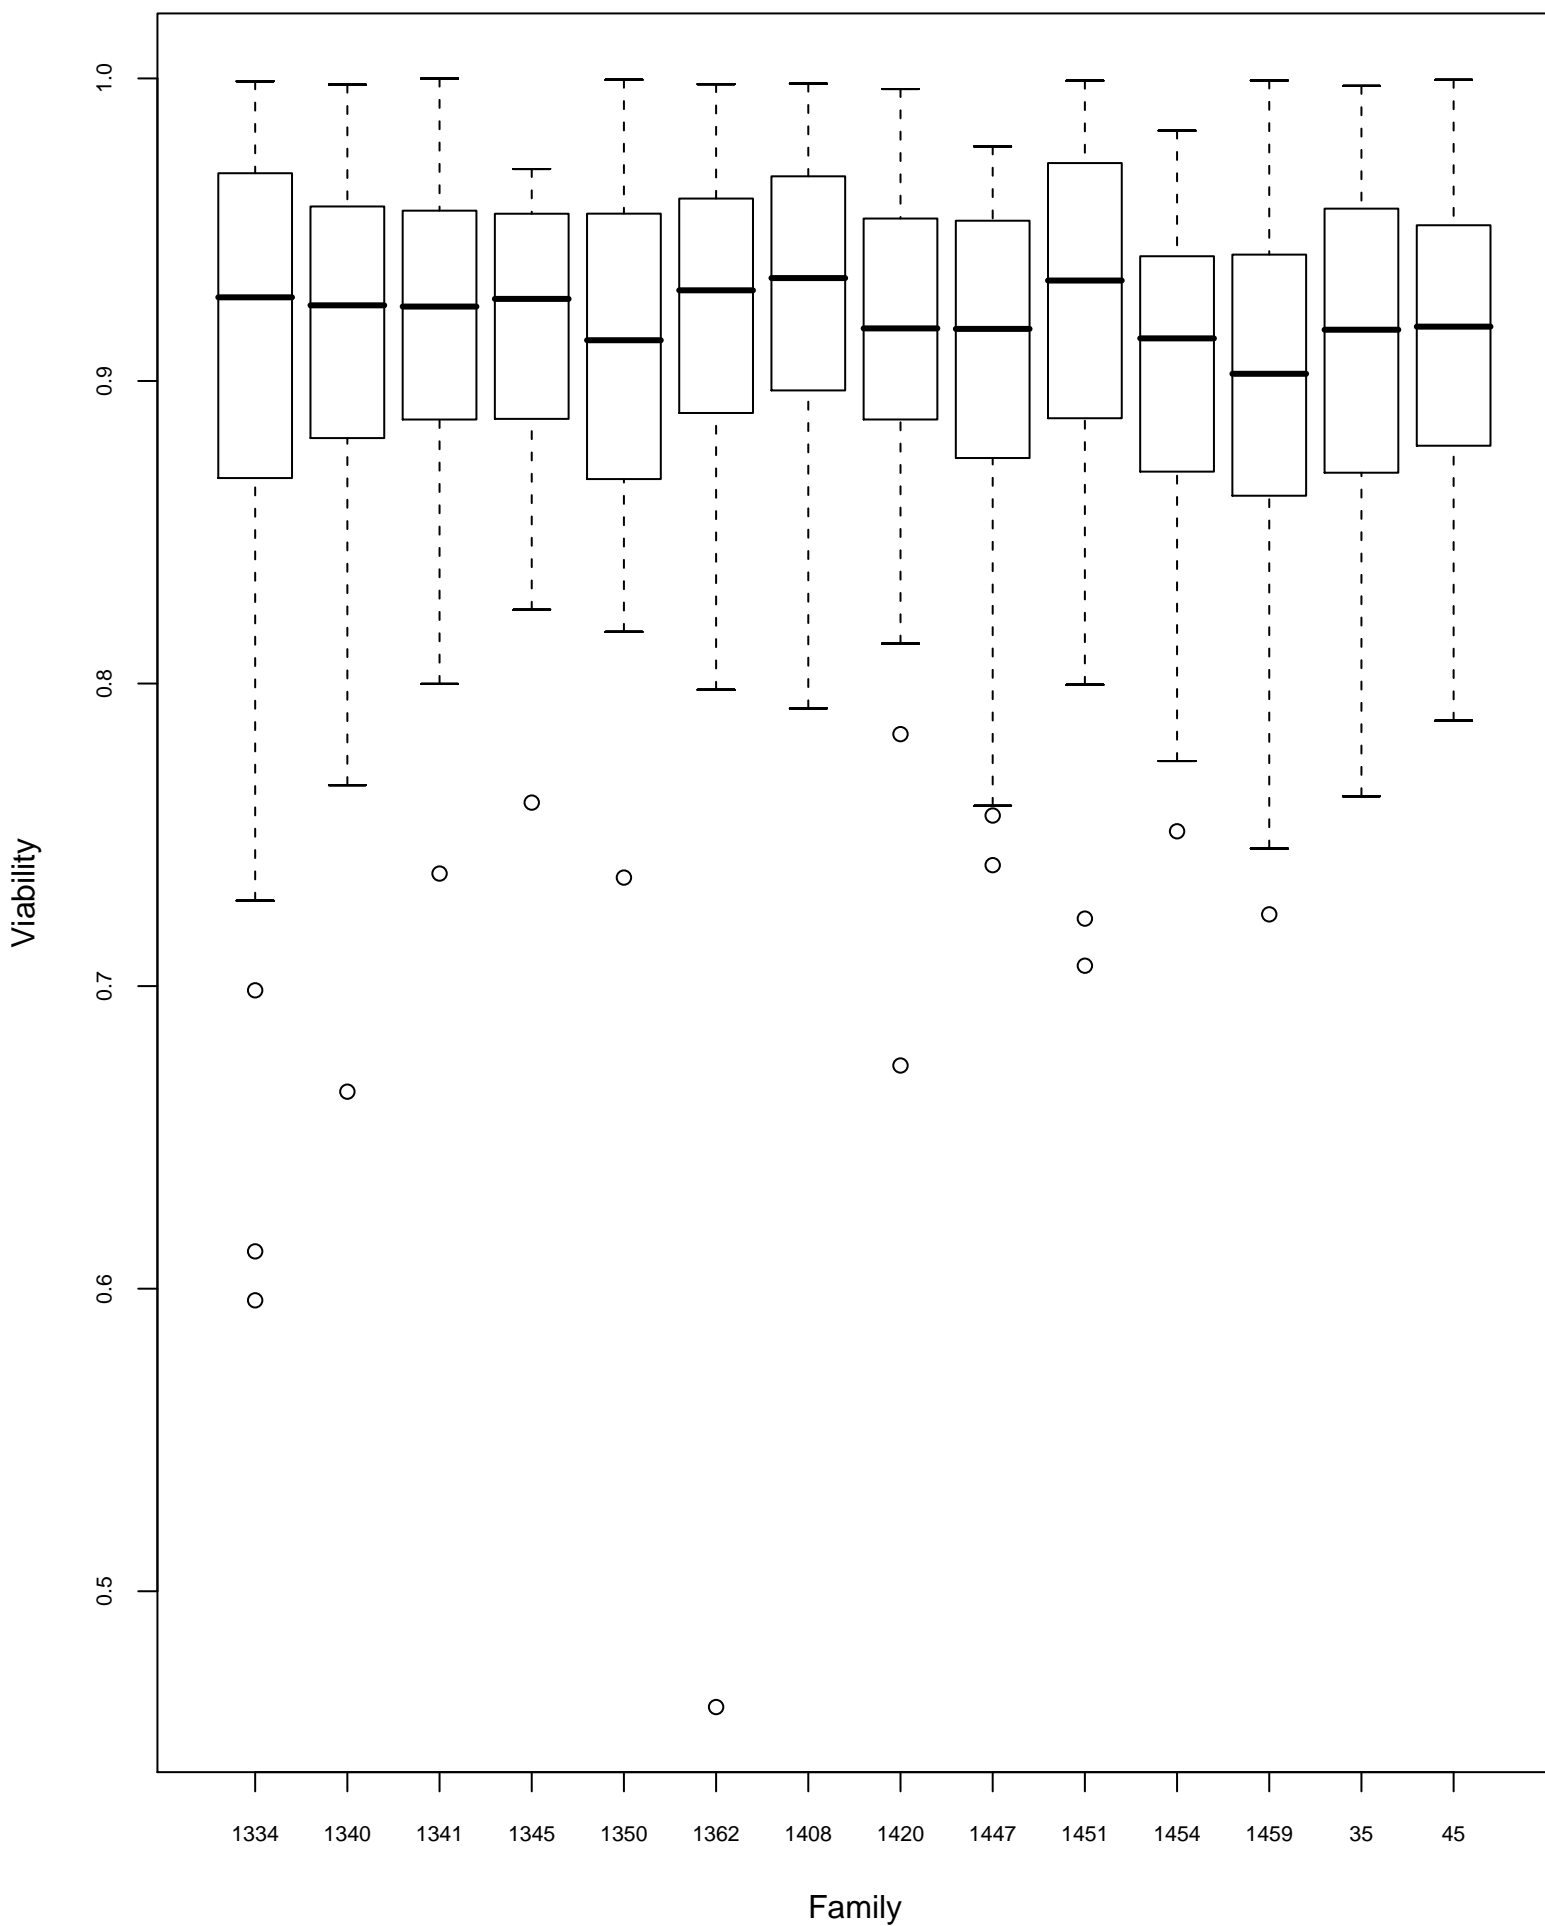

# Drug CPT, dose 1e-08 (mM)

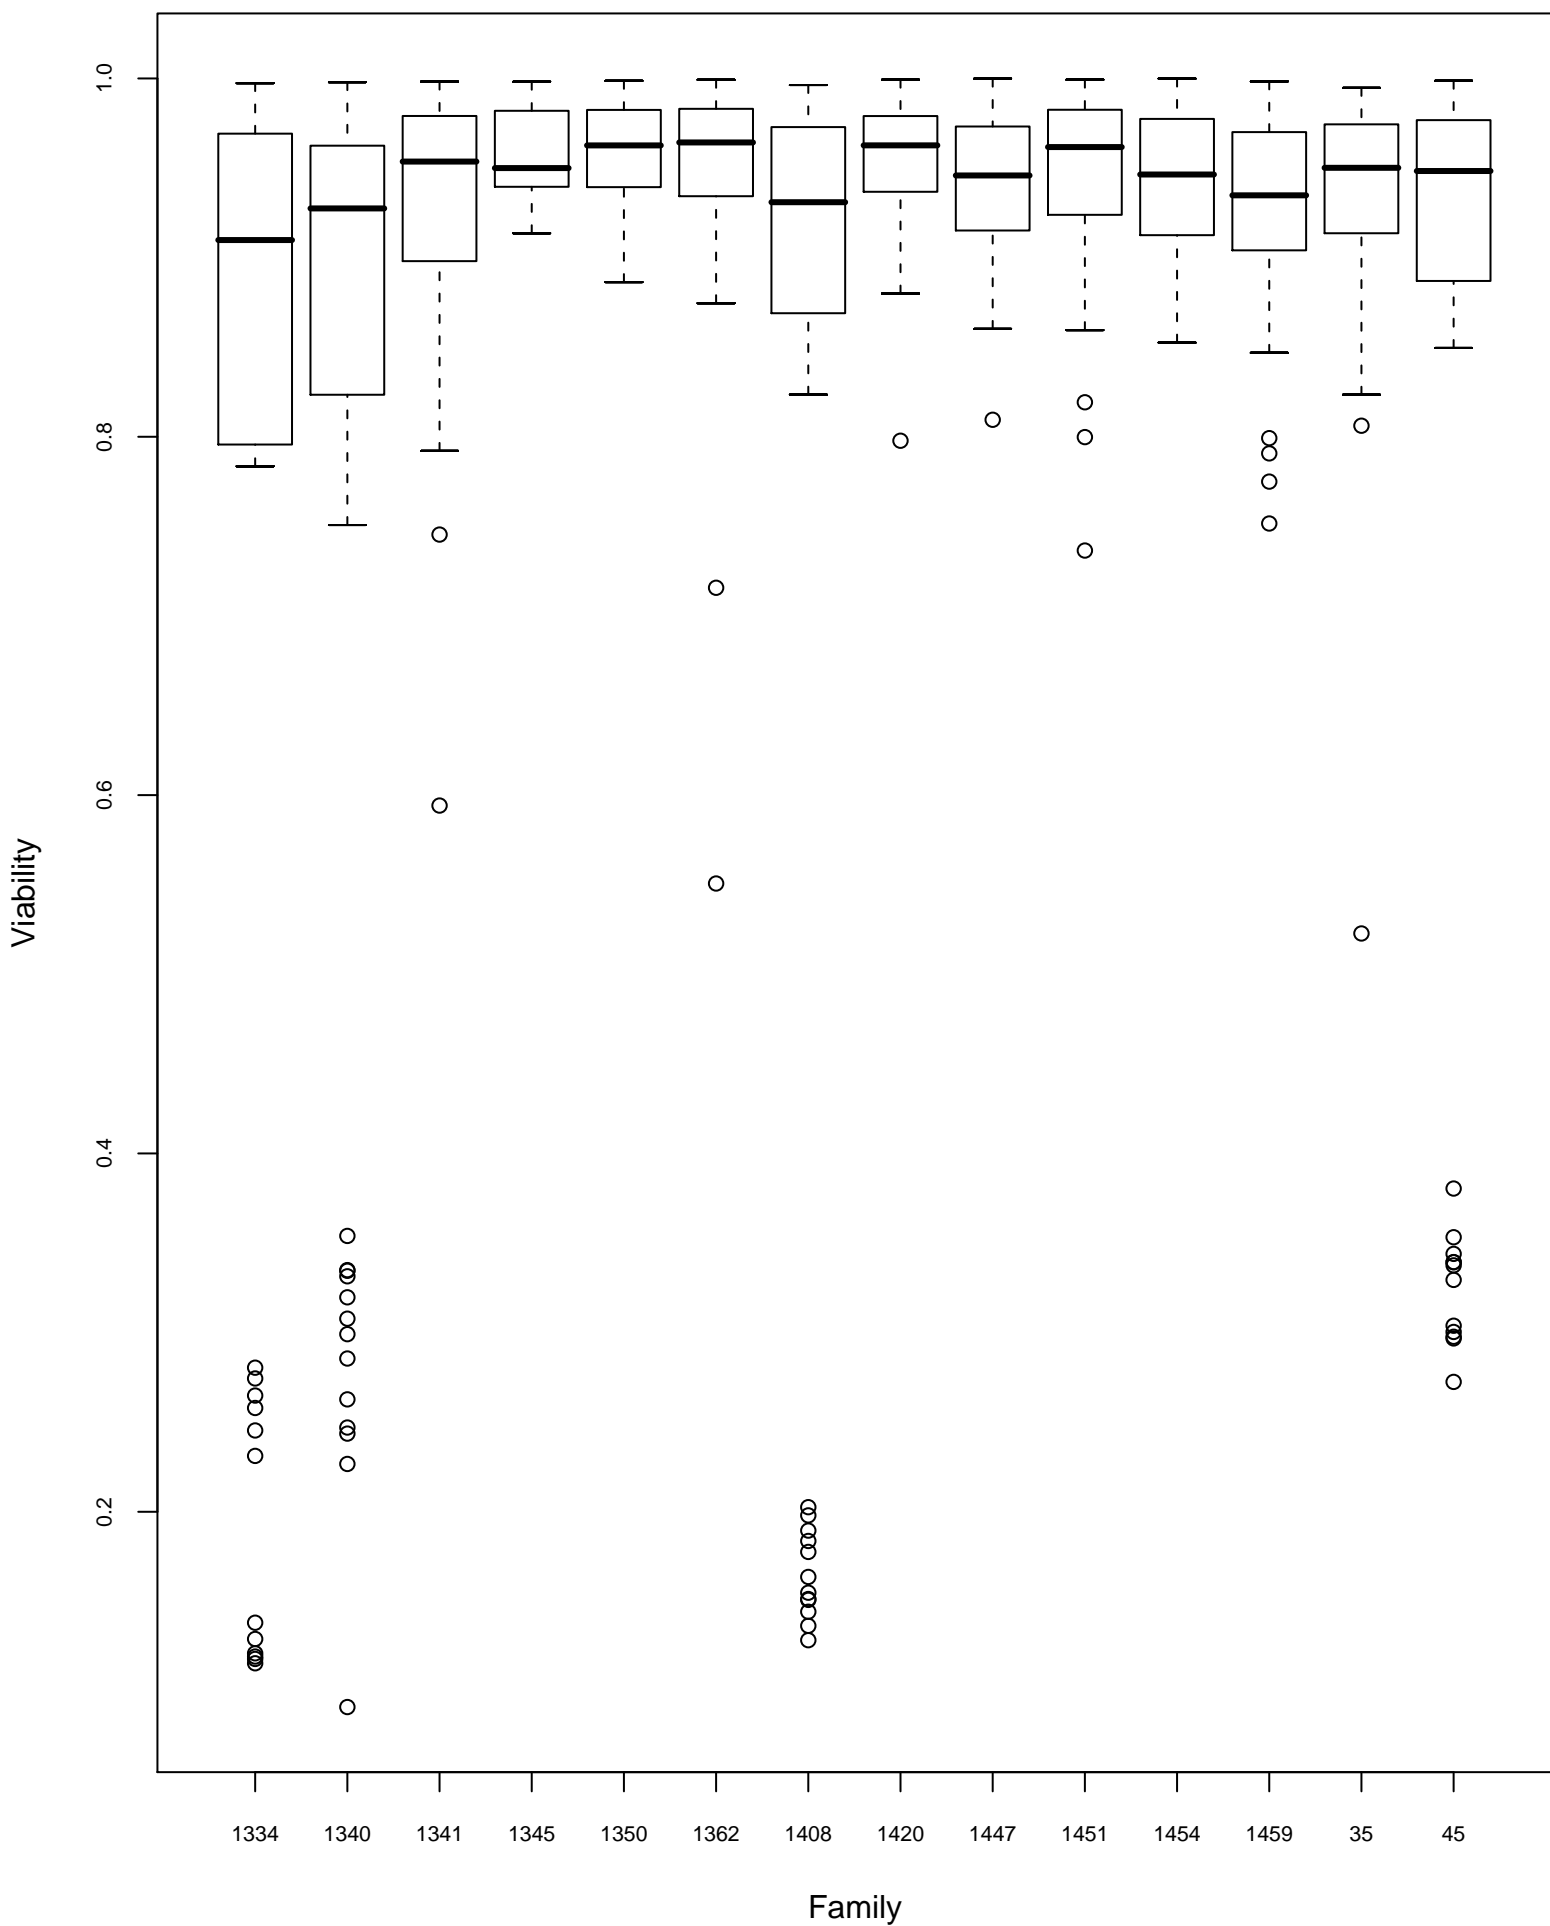

# Drug CPT11, dose 0.05 (mM)

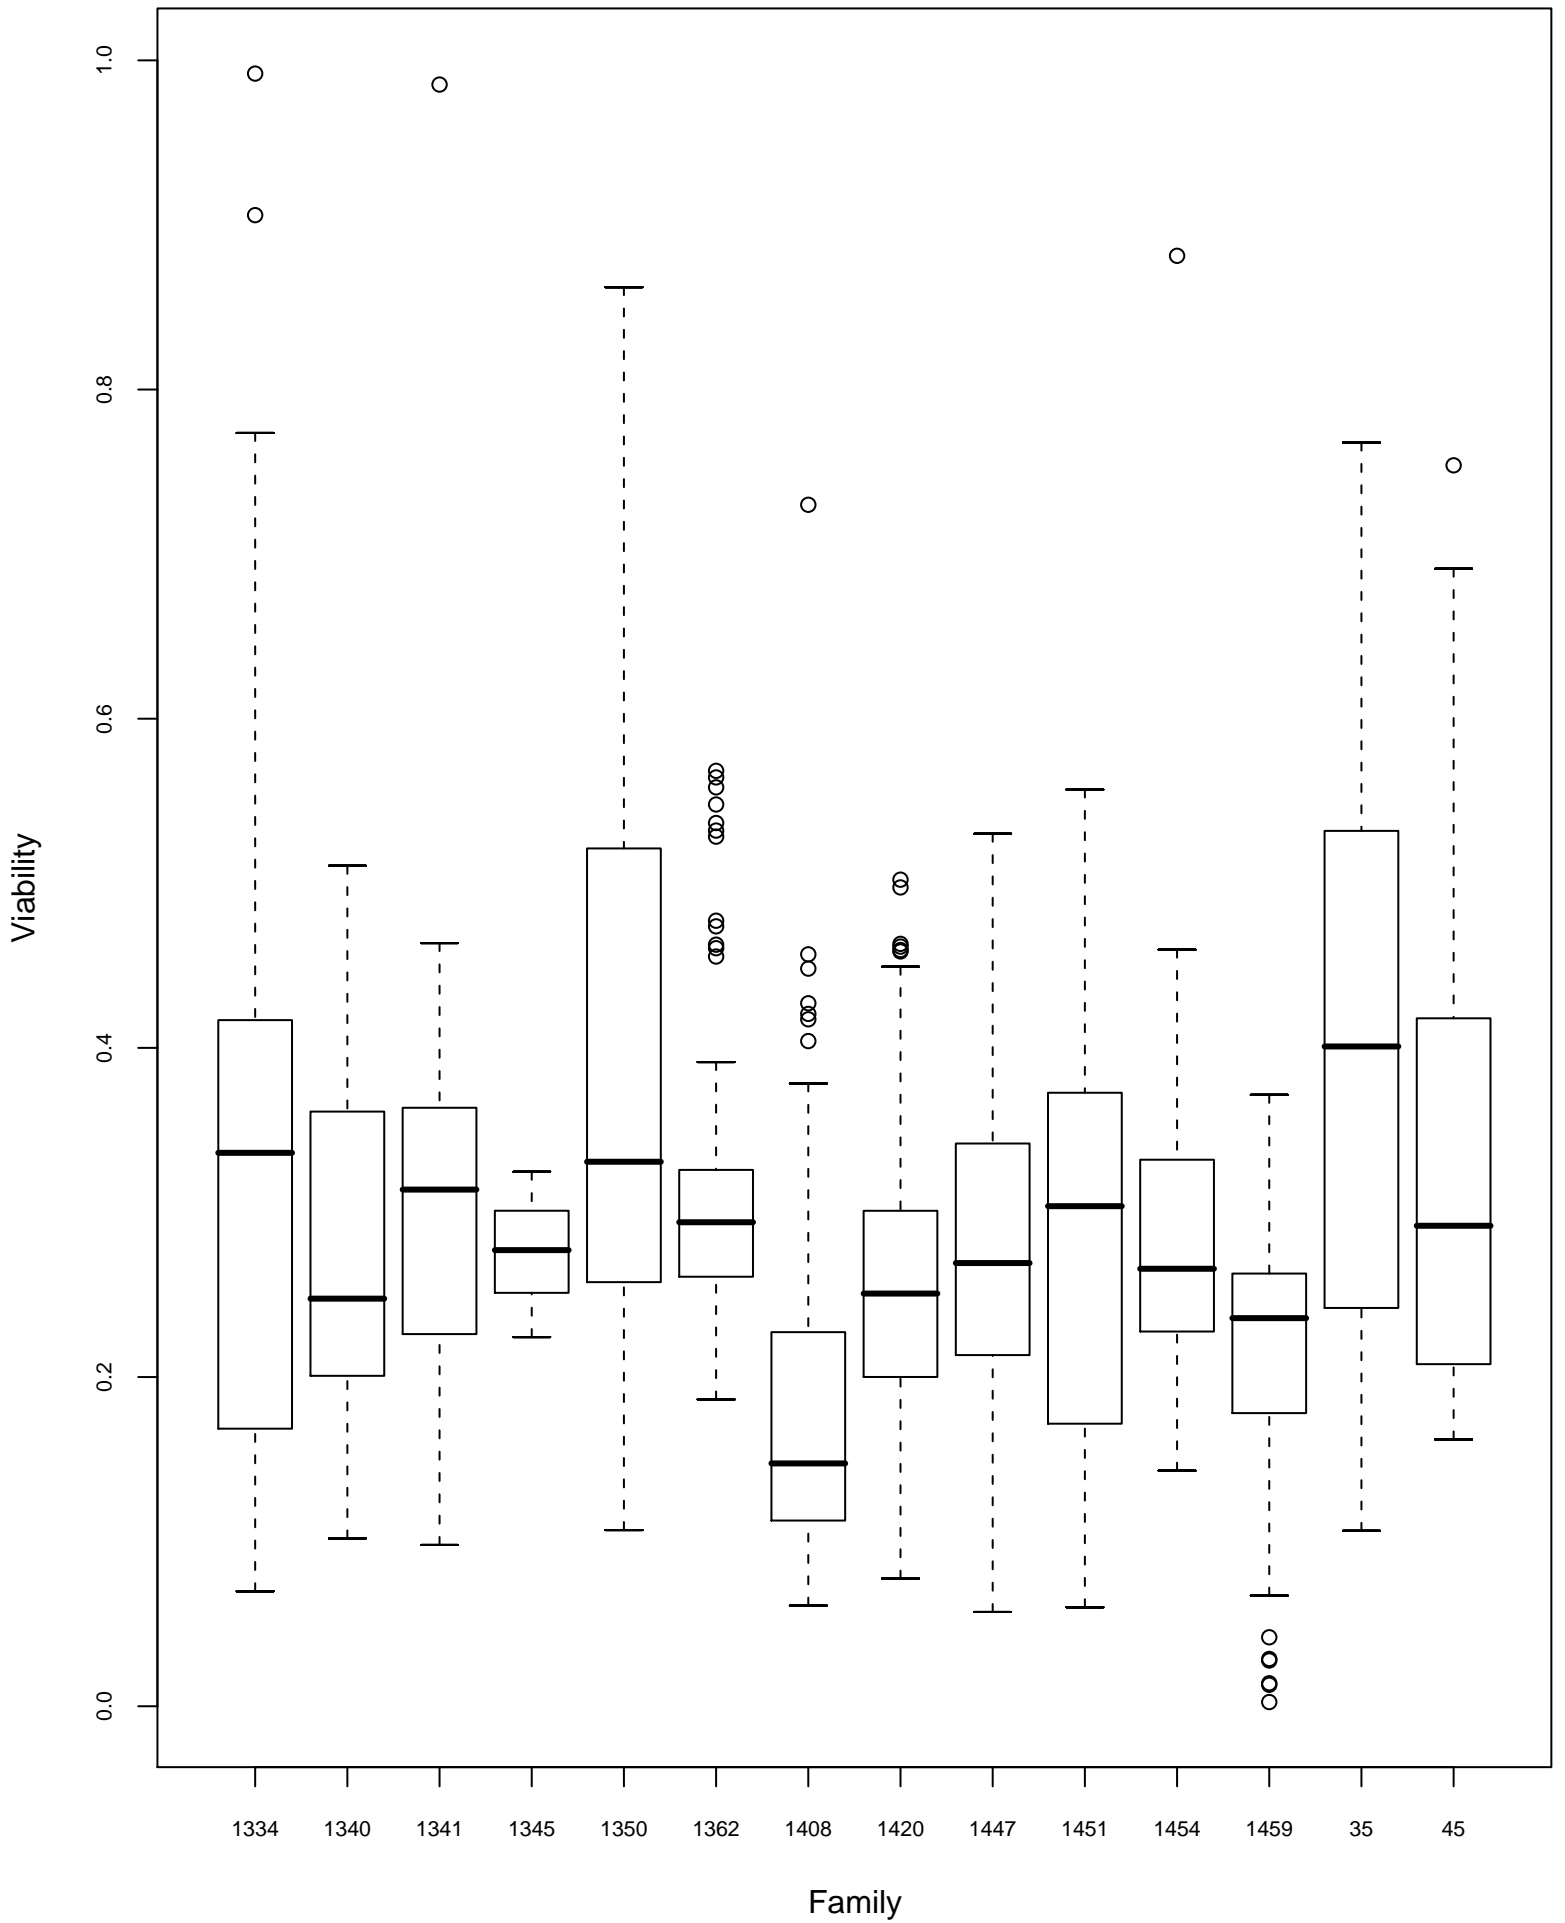

# Drug CPT11, dose 0.01 (mM)

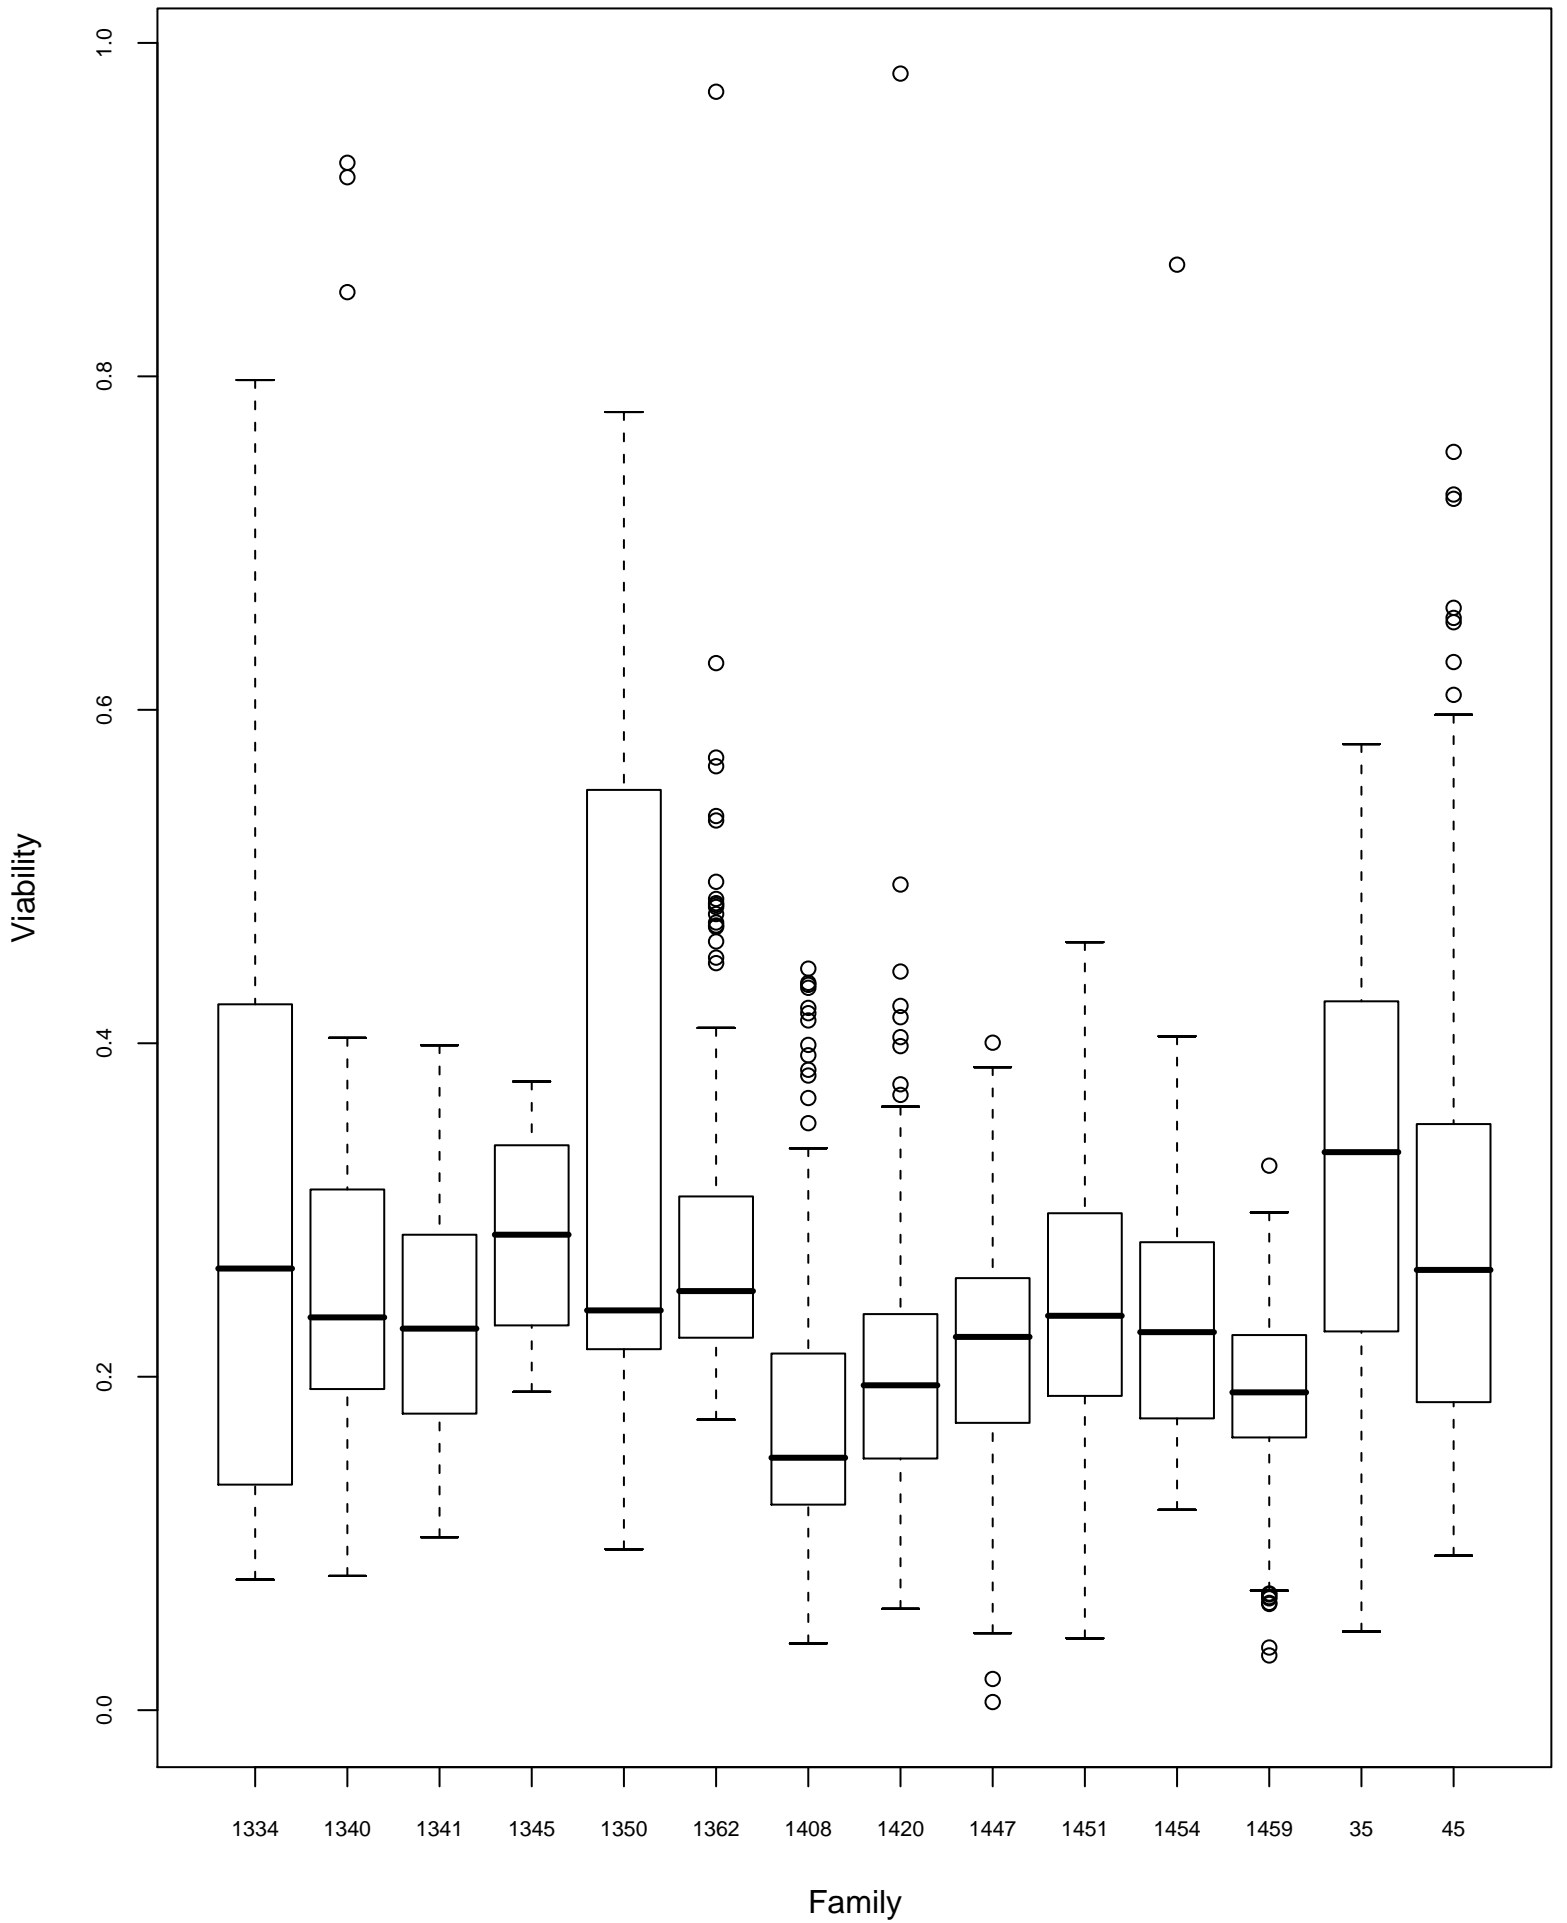

# Drug CPT11, dose 0.006 (mM)

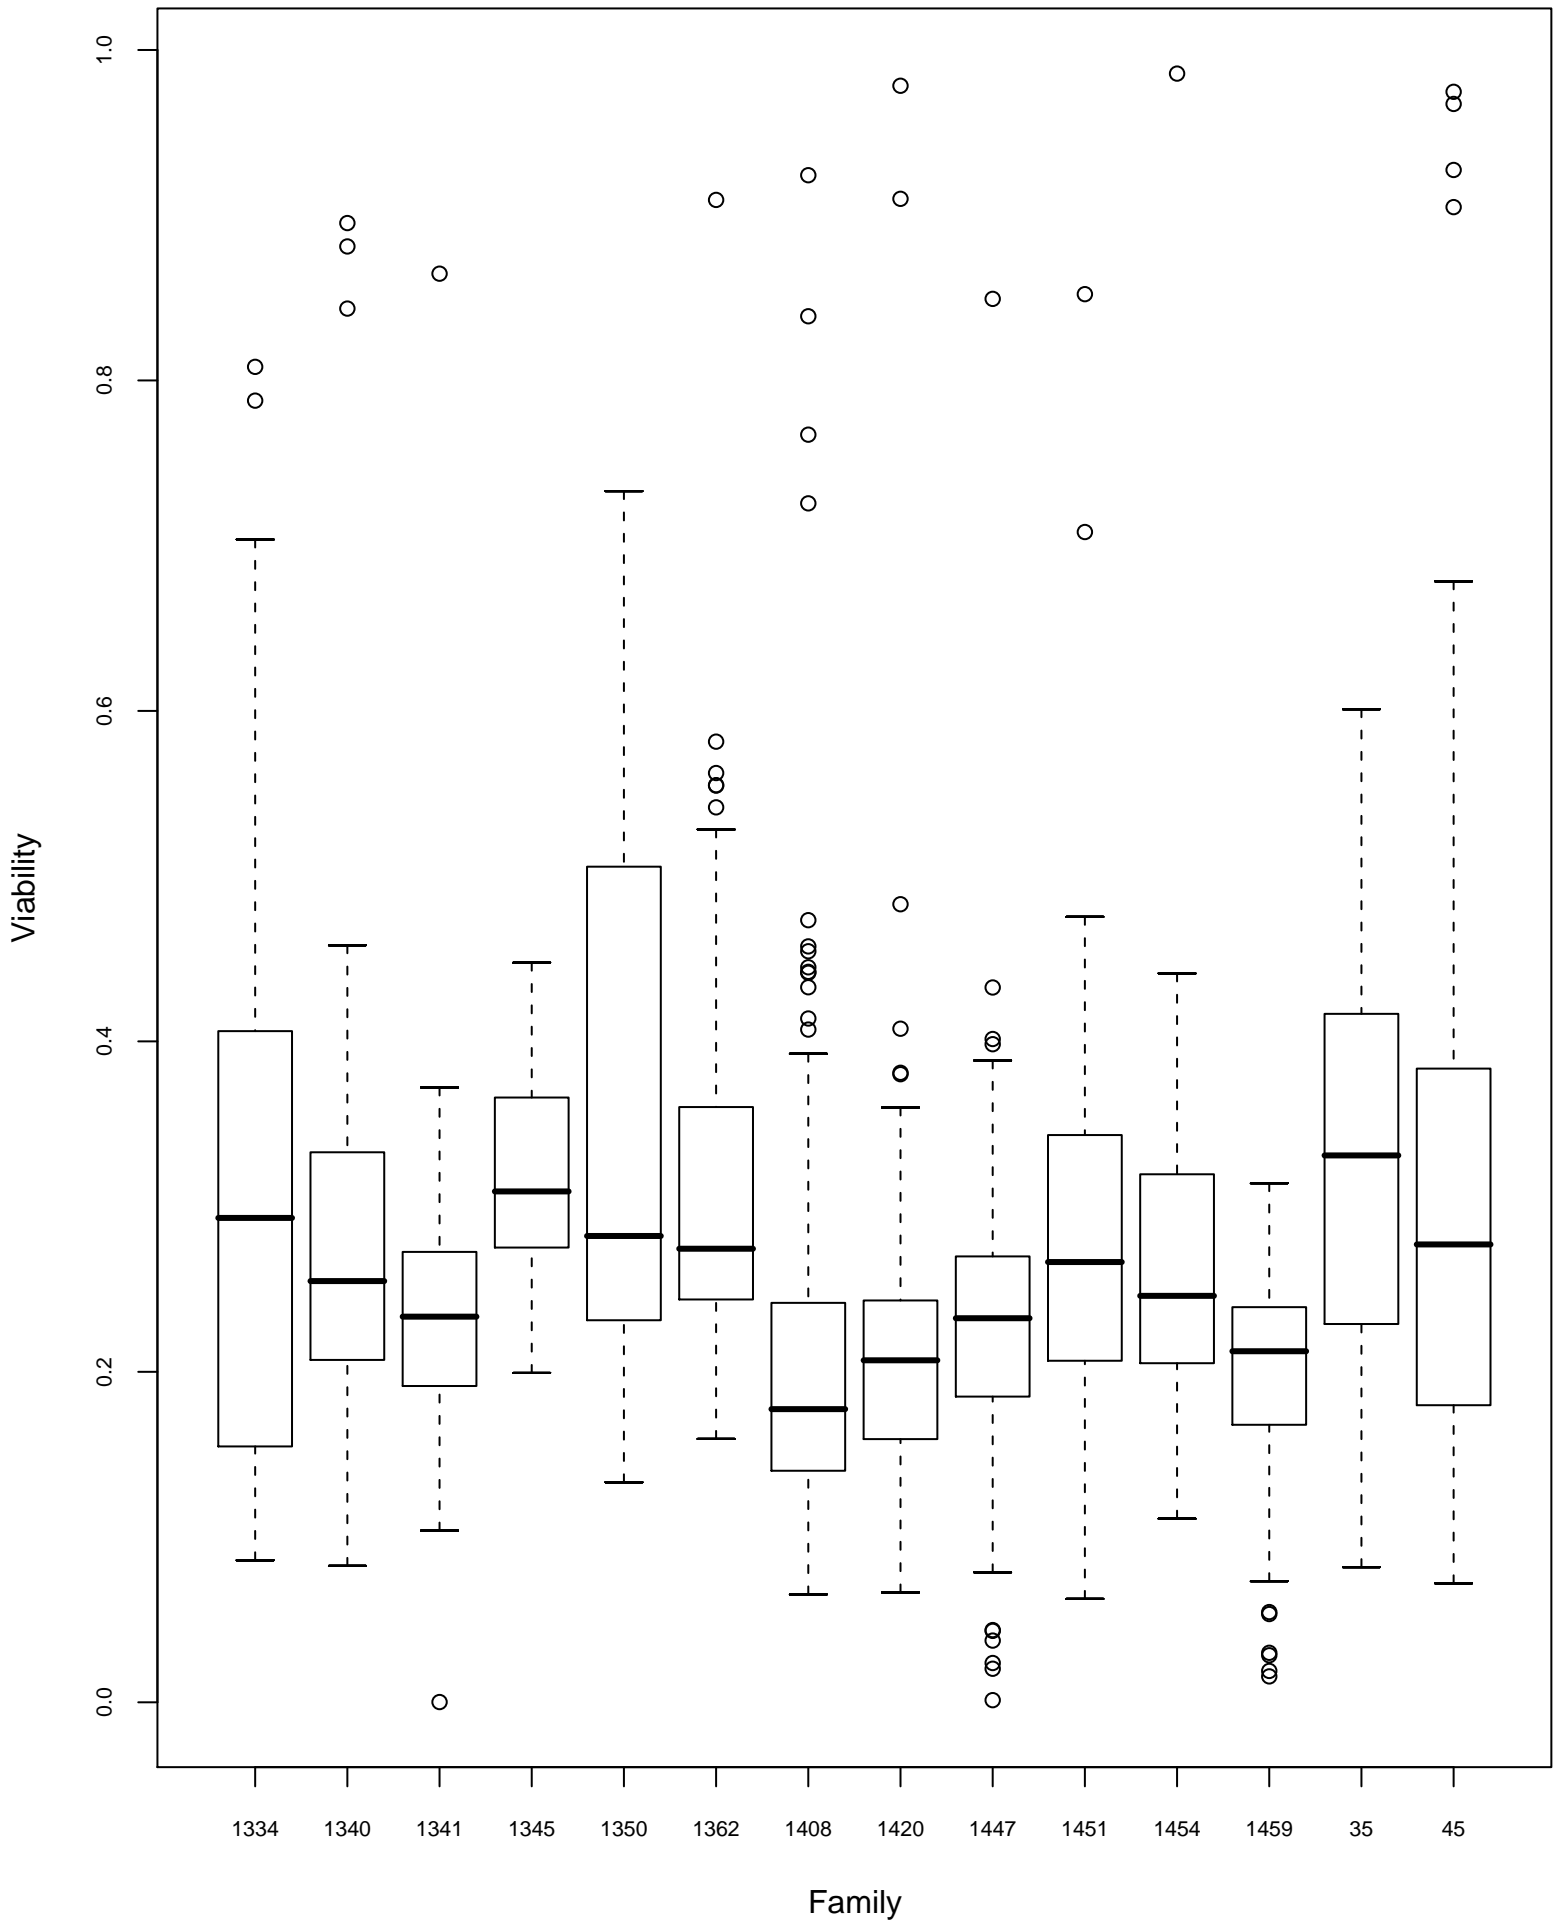

# Drug CPT11, dose 0.002 (mM)

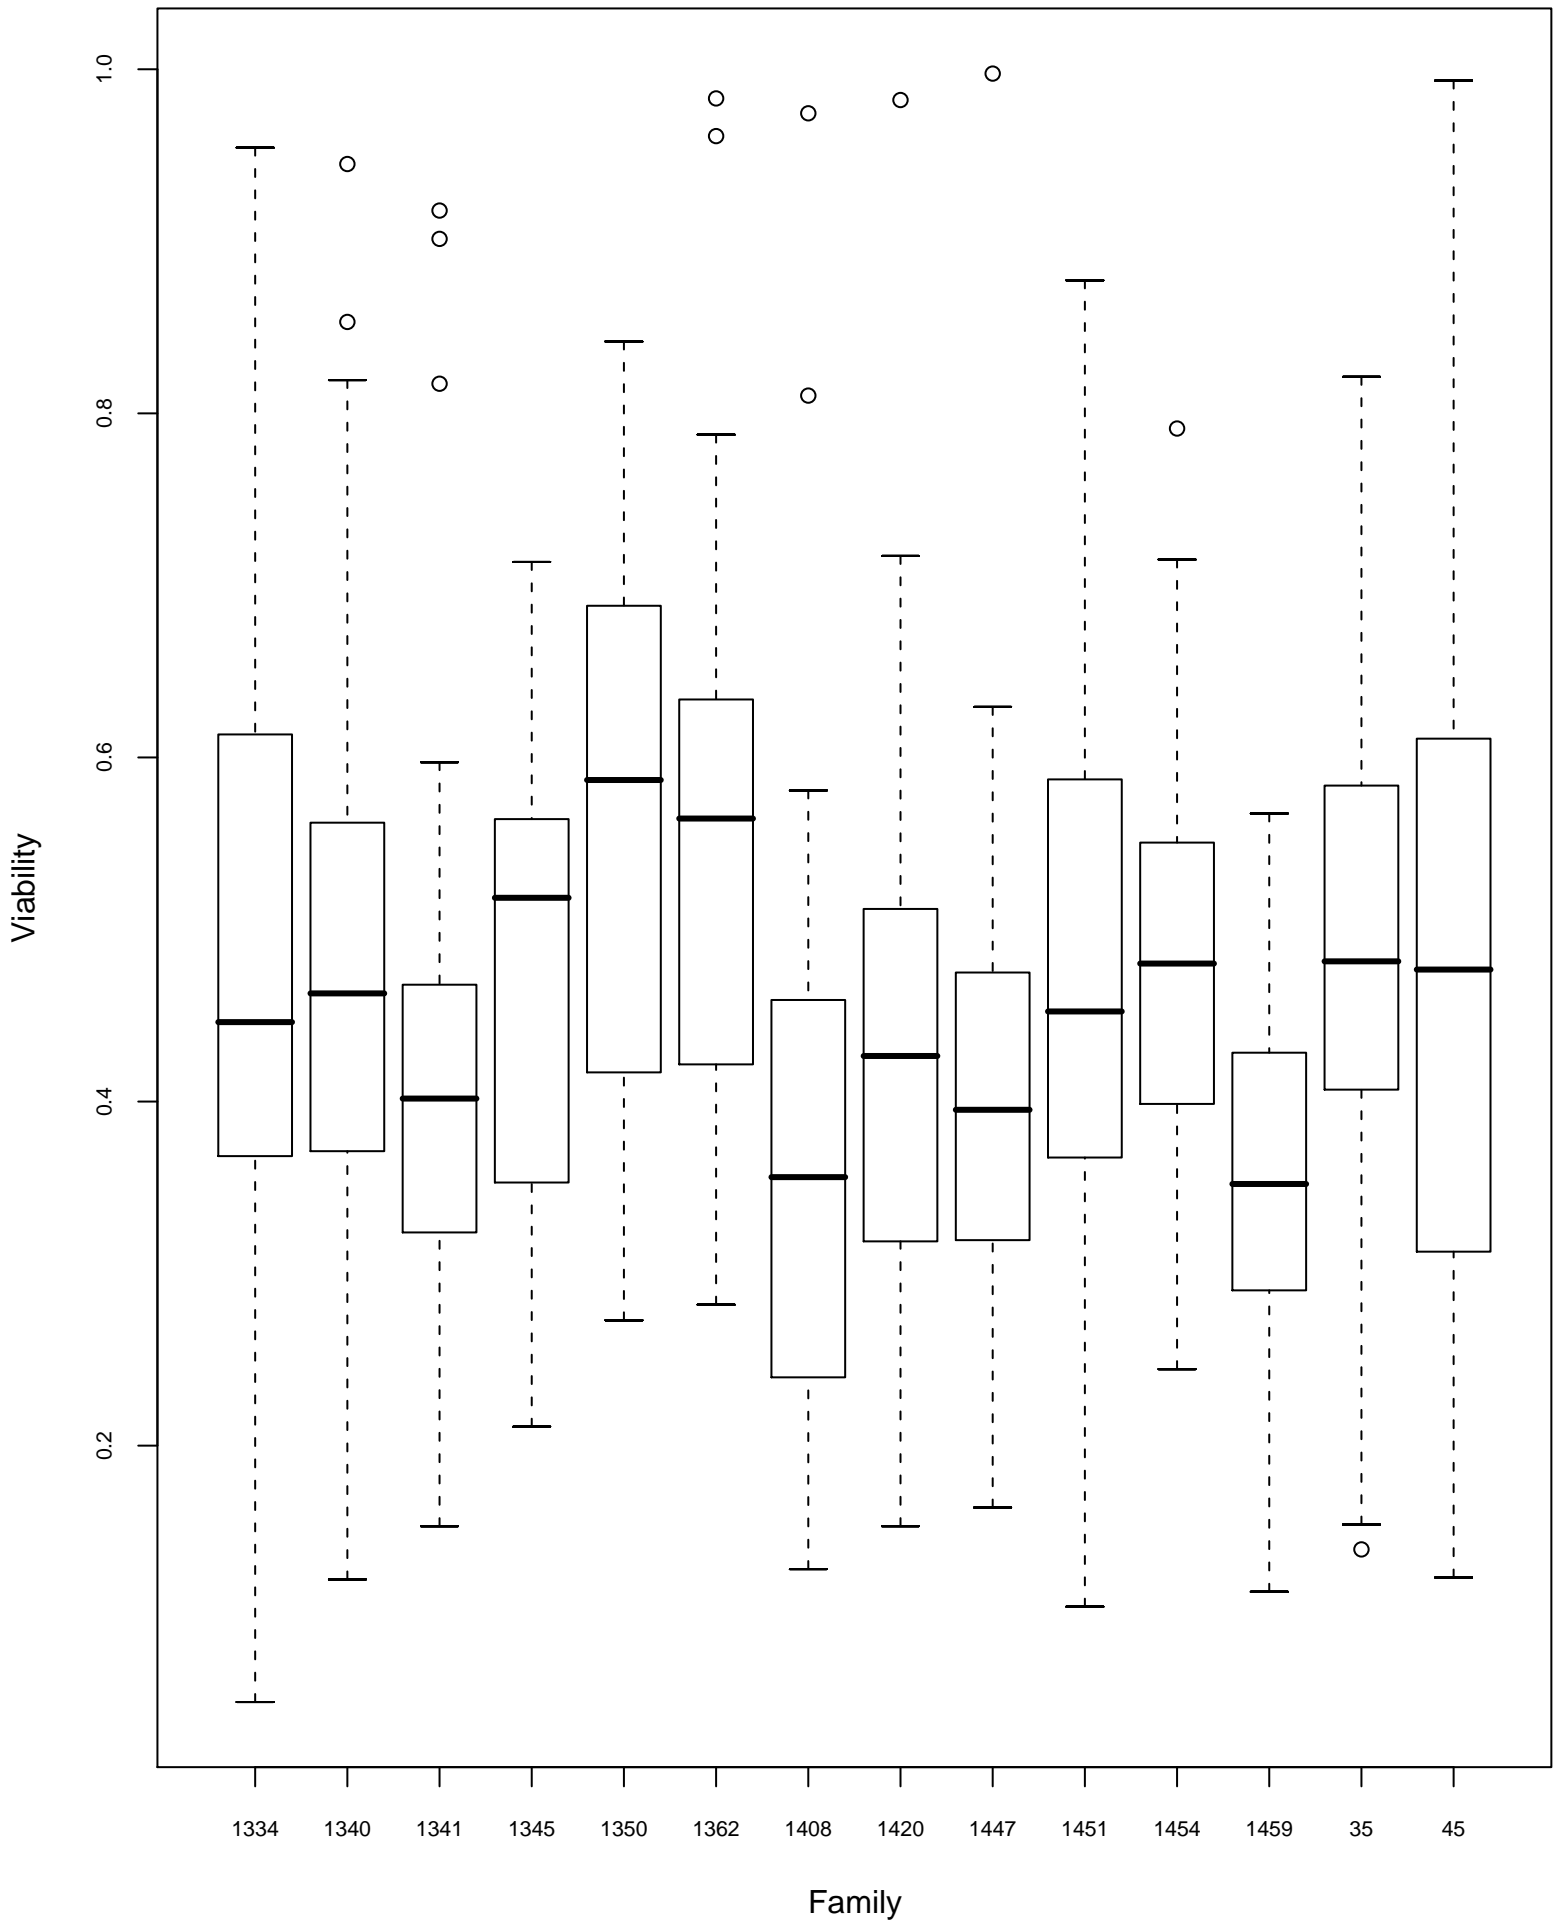

# Drug CPT11, dose 0.0015 (mM)

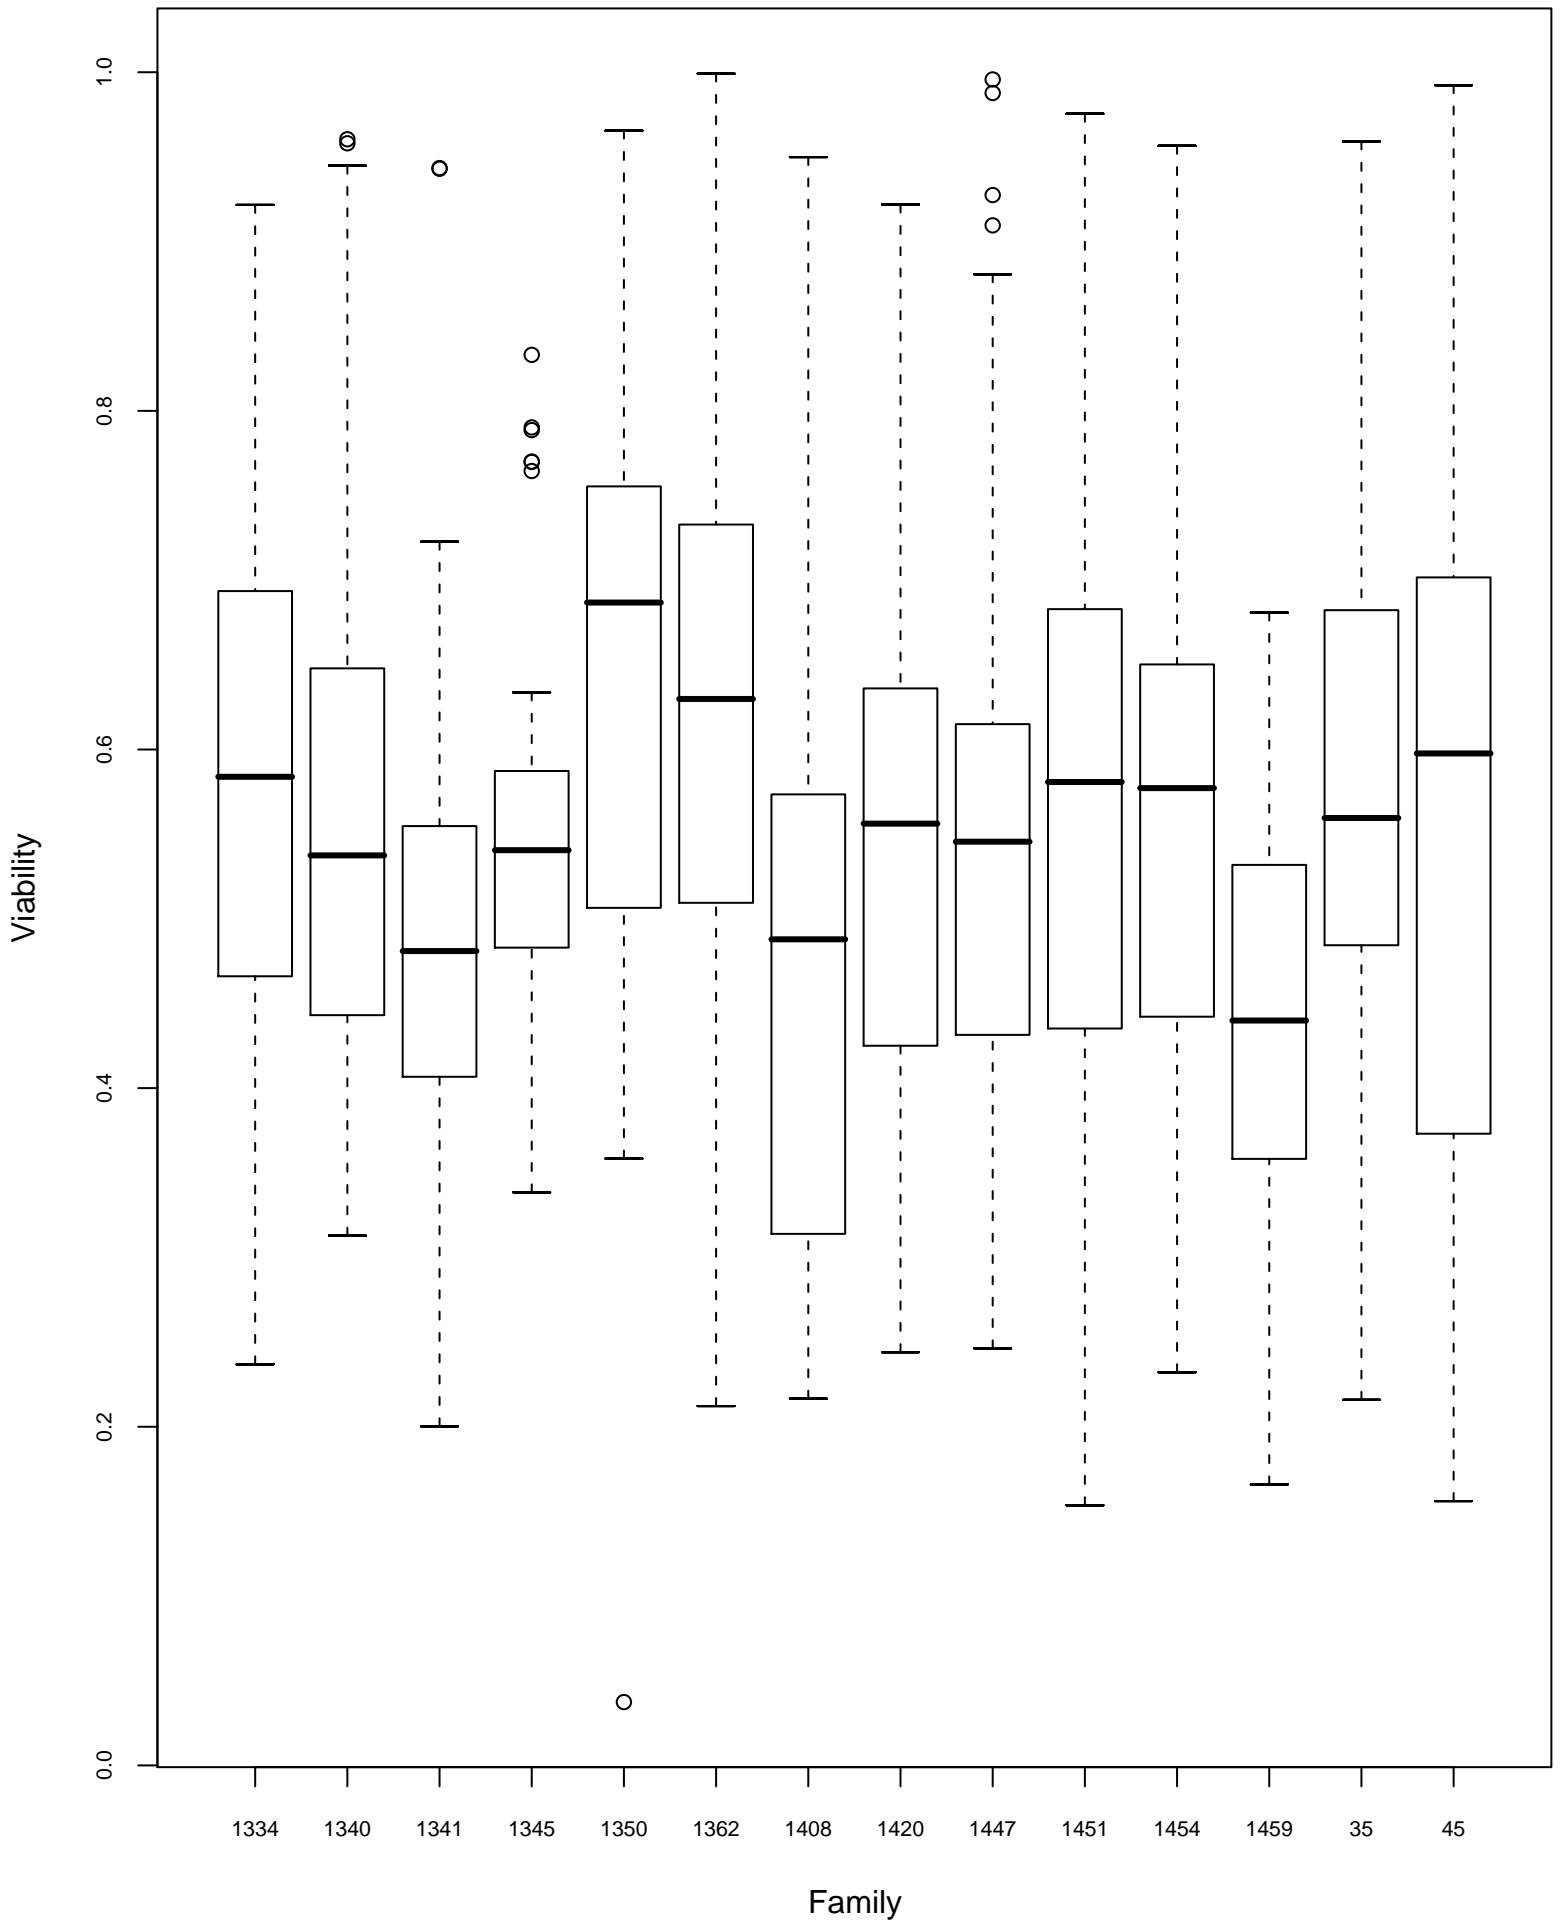



# Drug CPT11, dose 0.001 (mM)

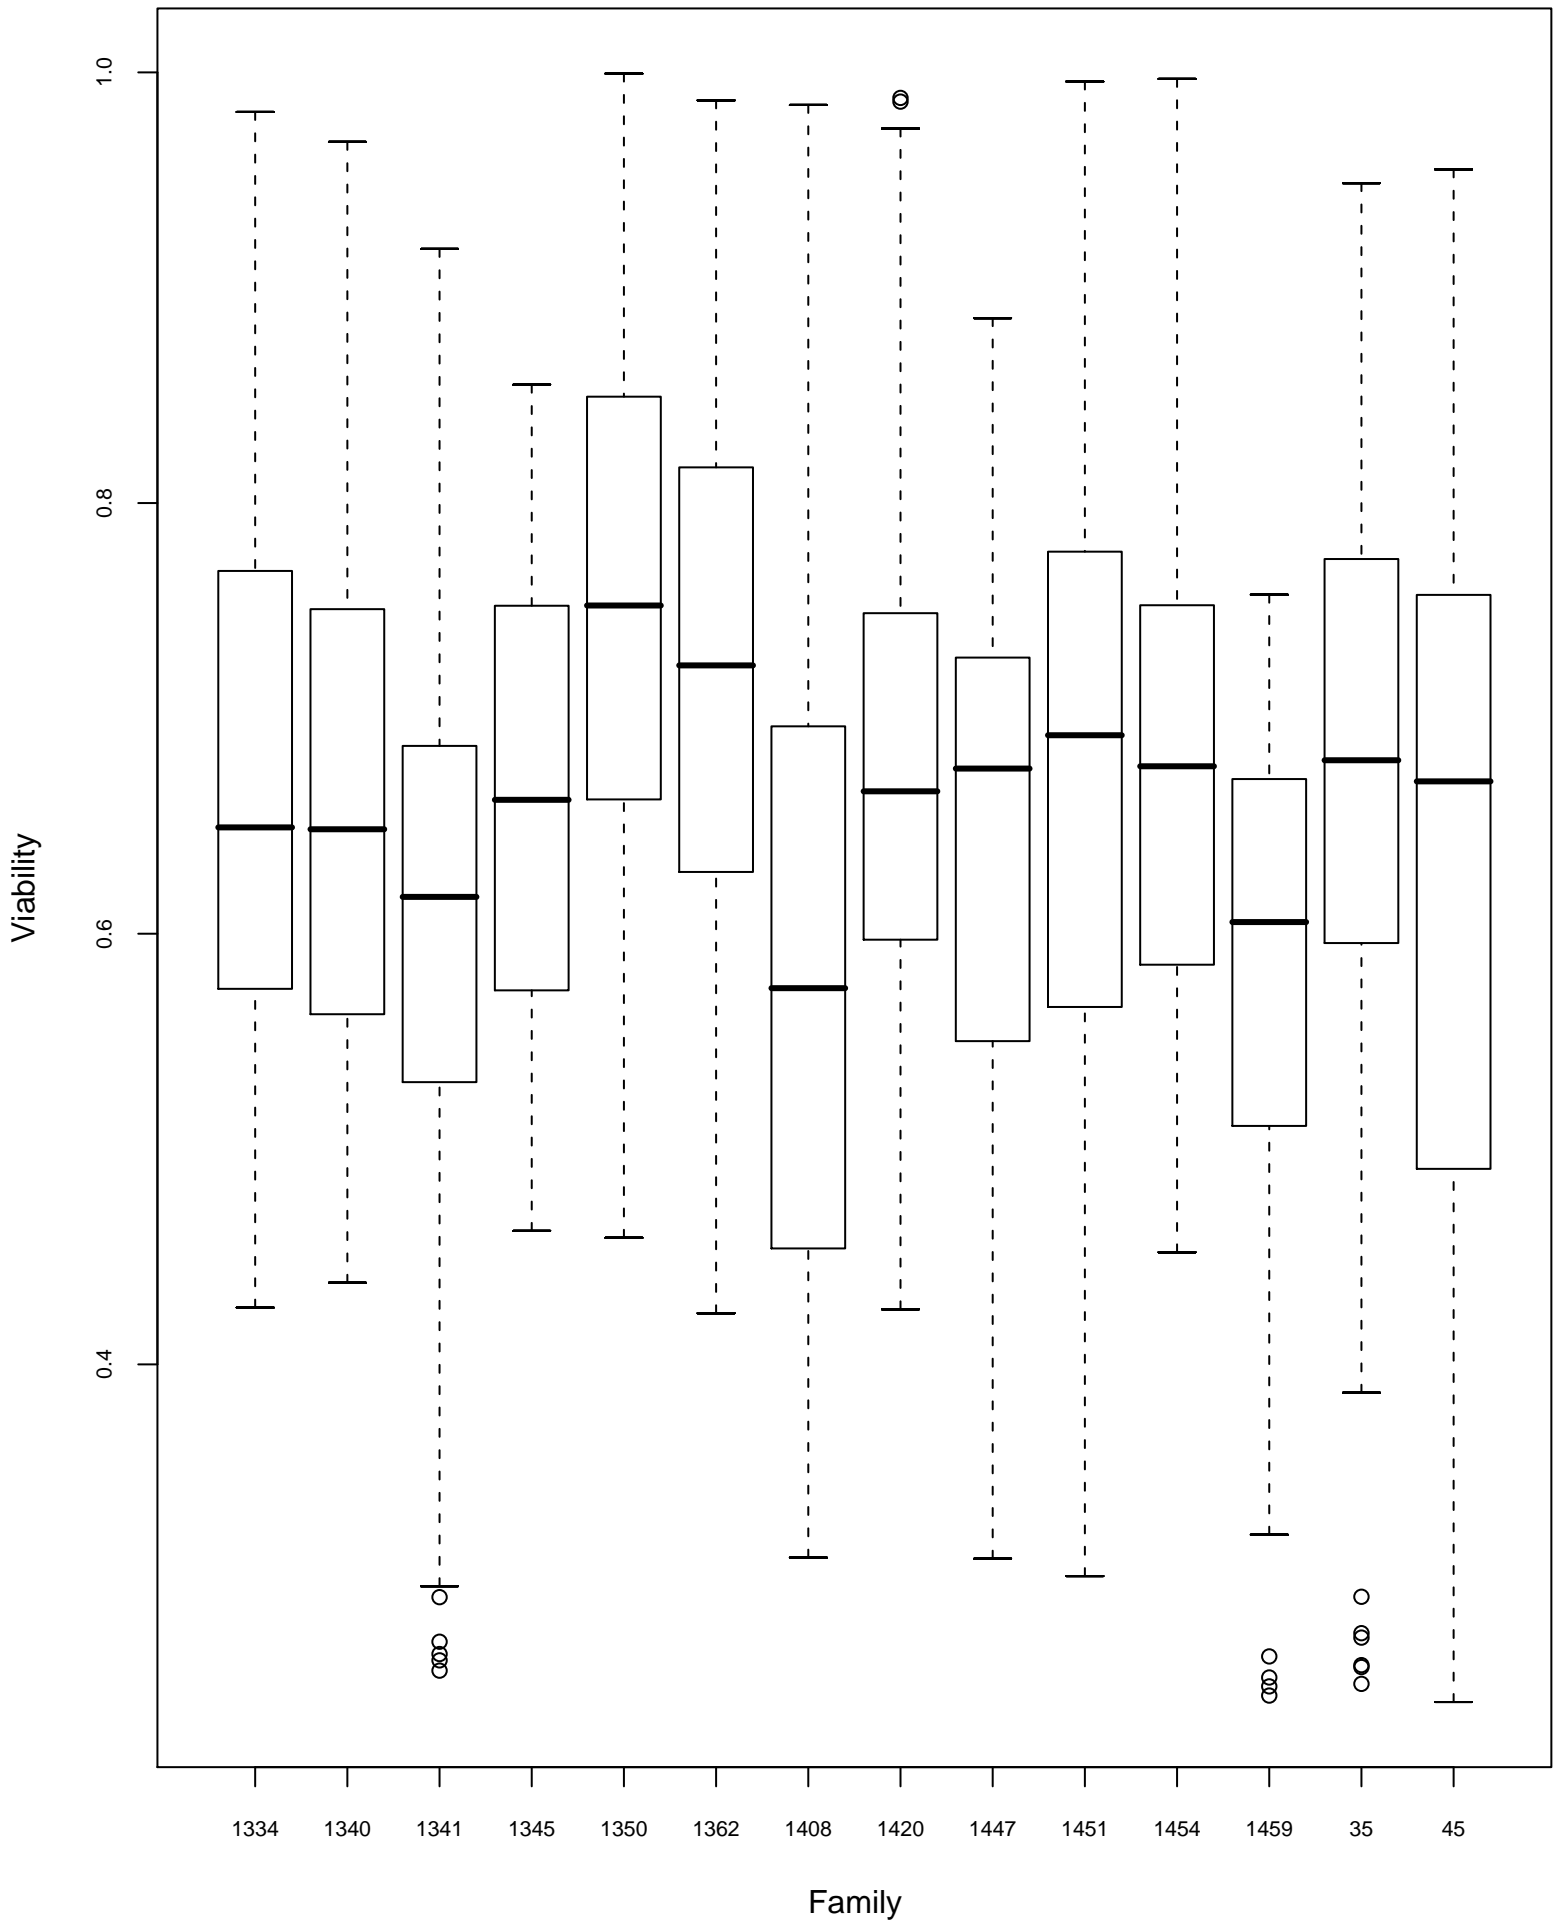

# Drug CPT11, dose 0.0006 (mM)

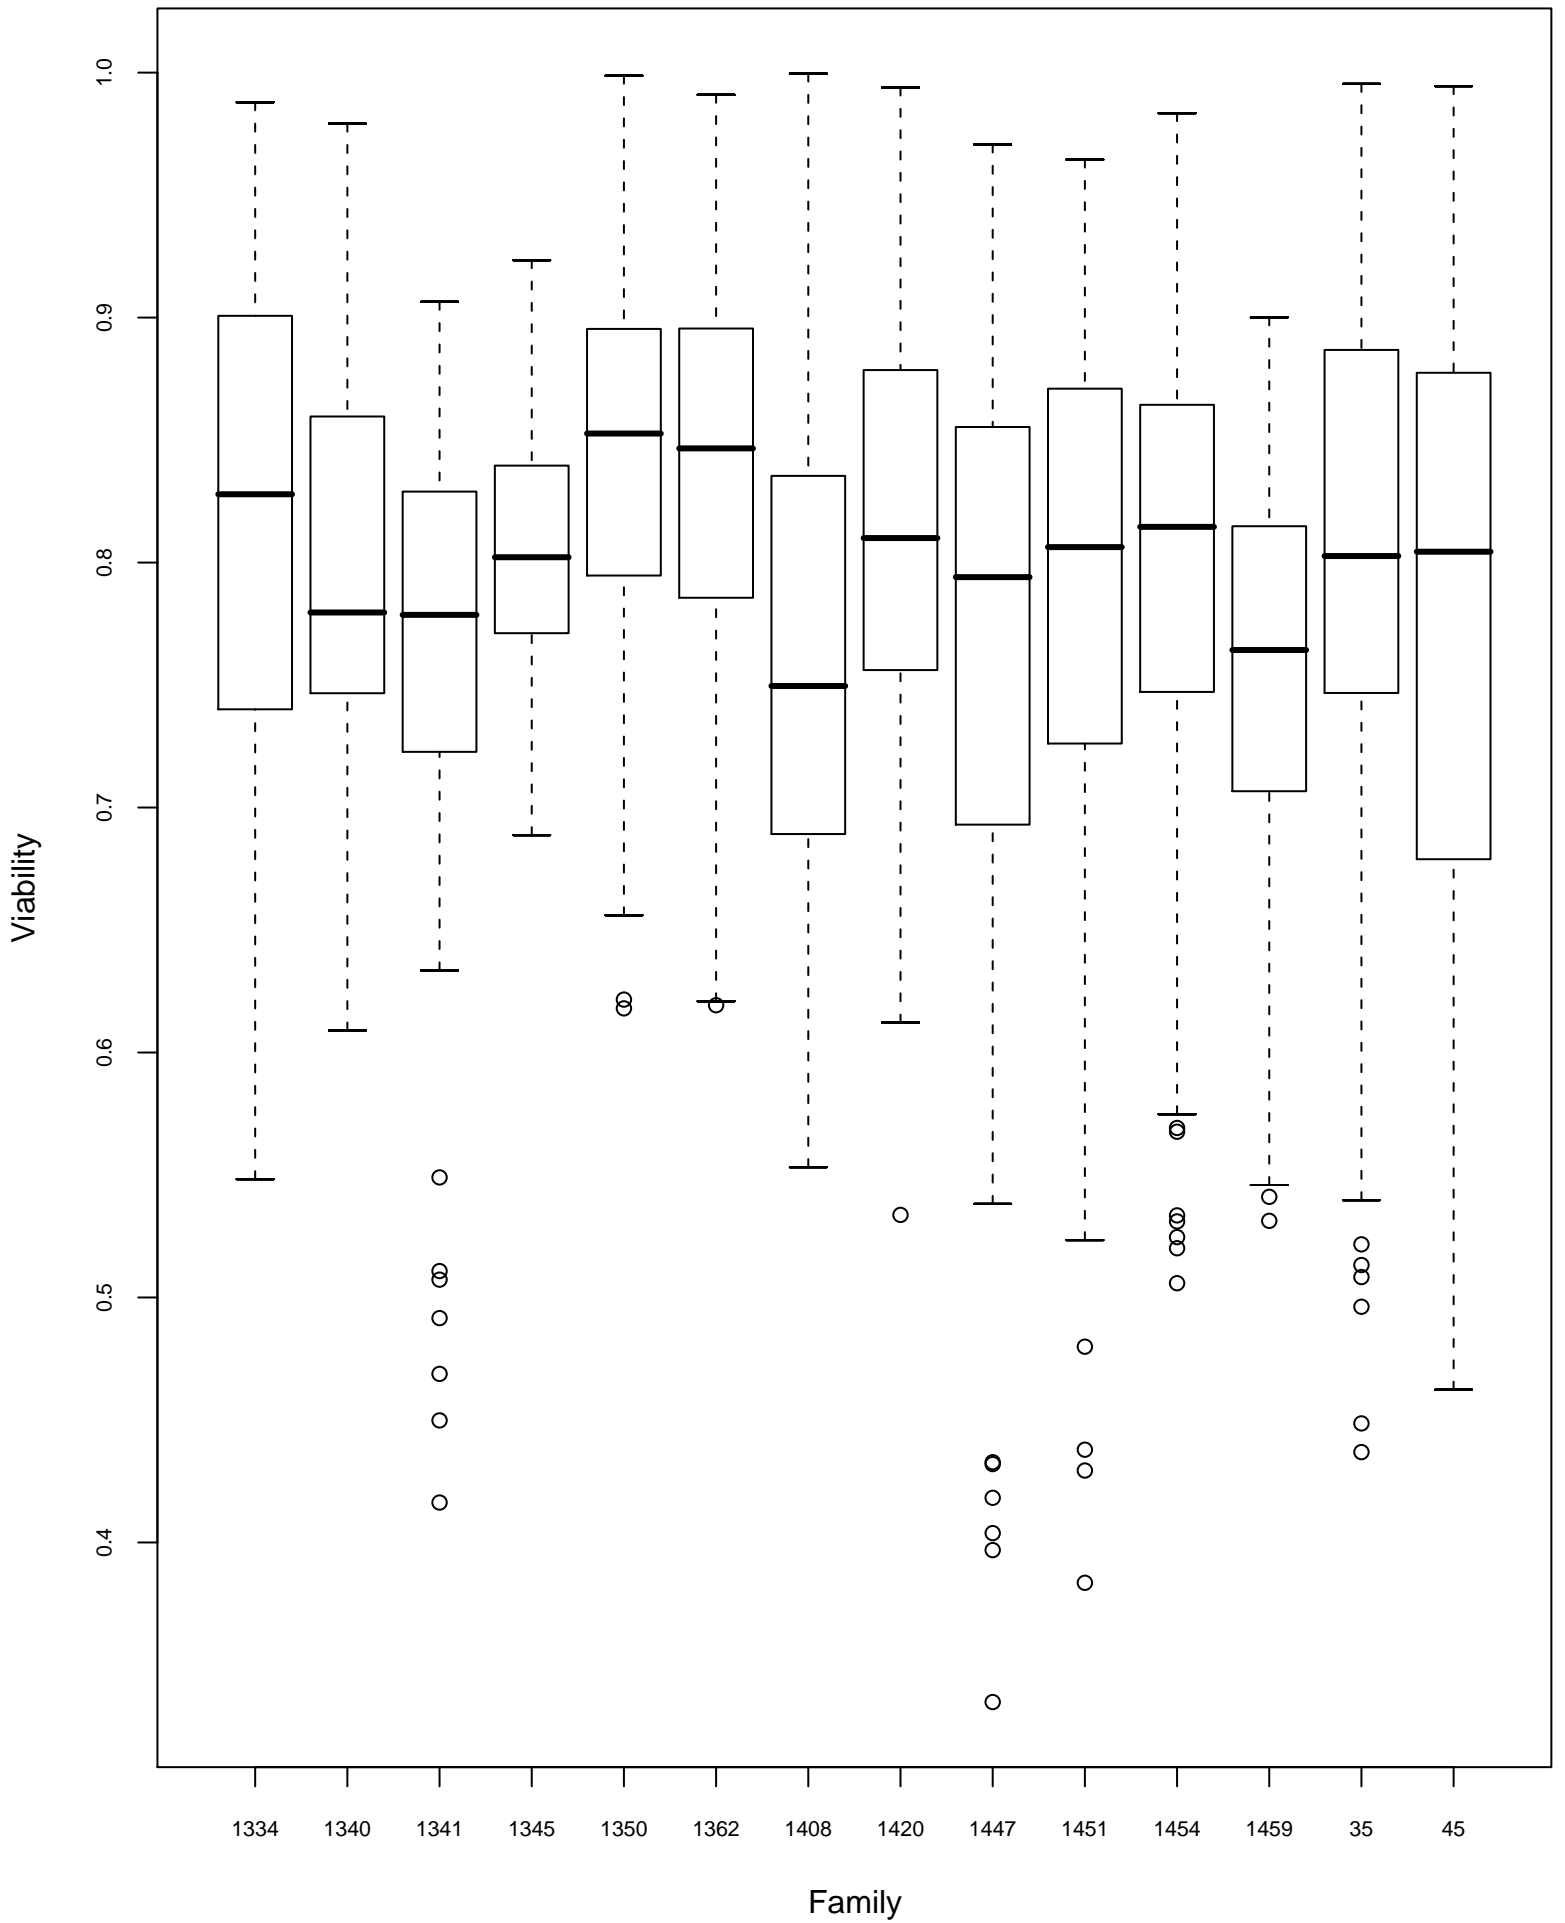

# Drug CPT11, dose 1.6e-05 (mM)

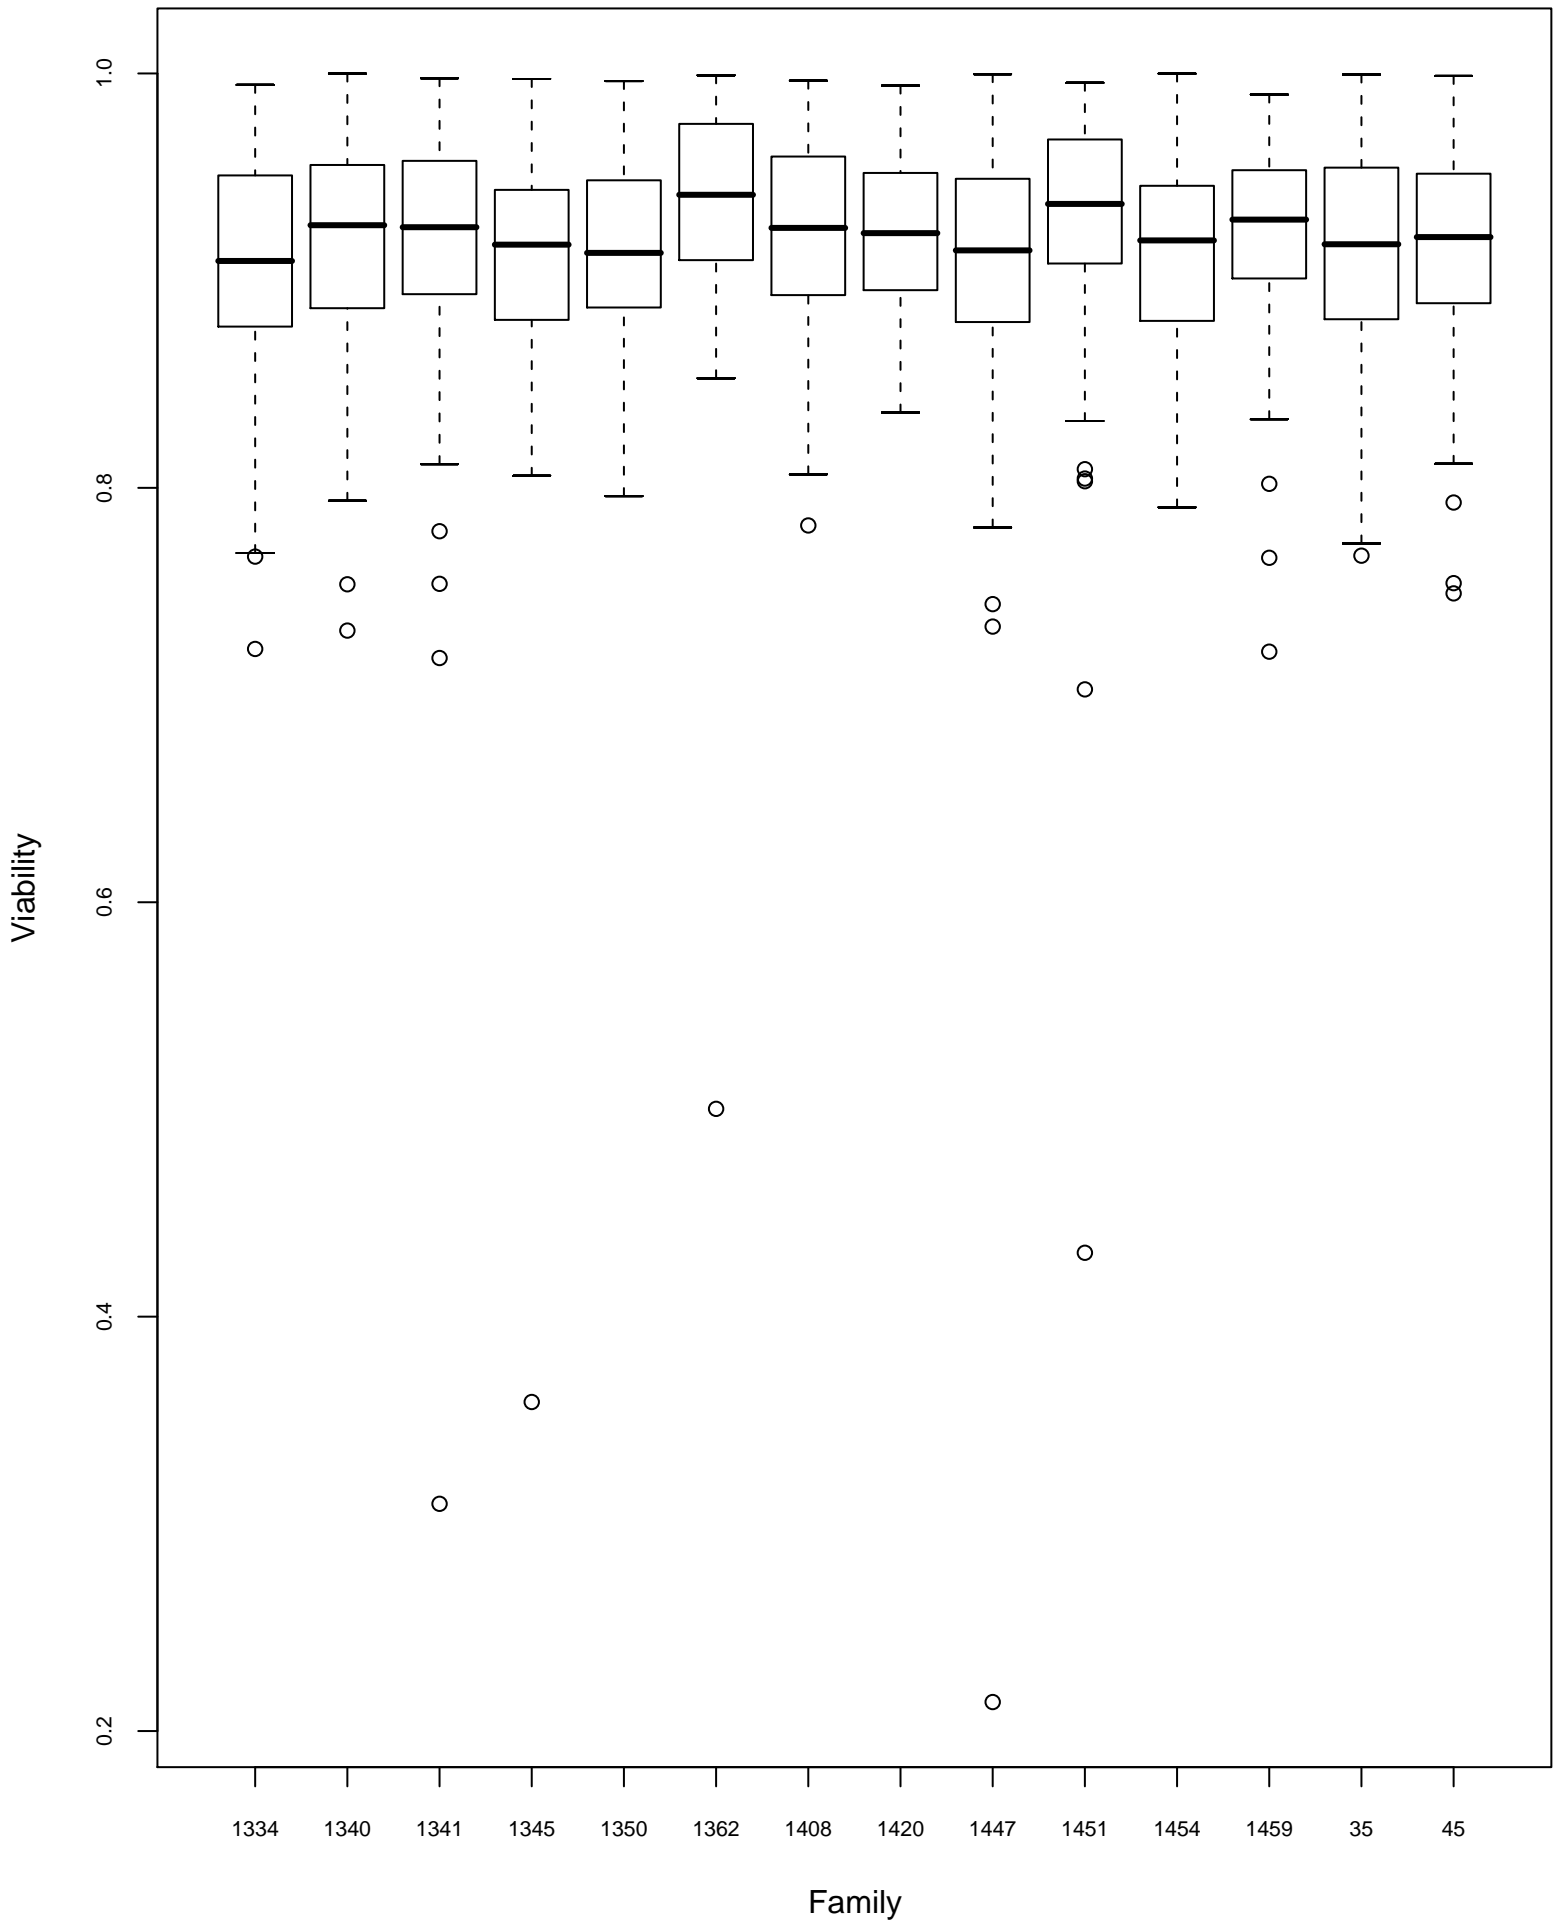

# Drug CPT11, dose 4e-06 (mM)

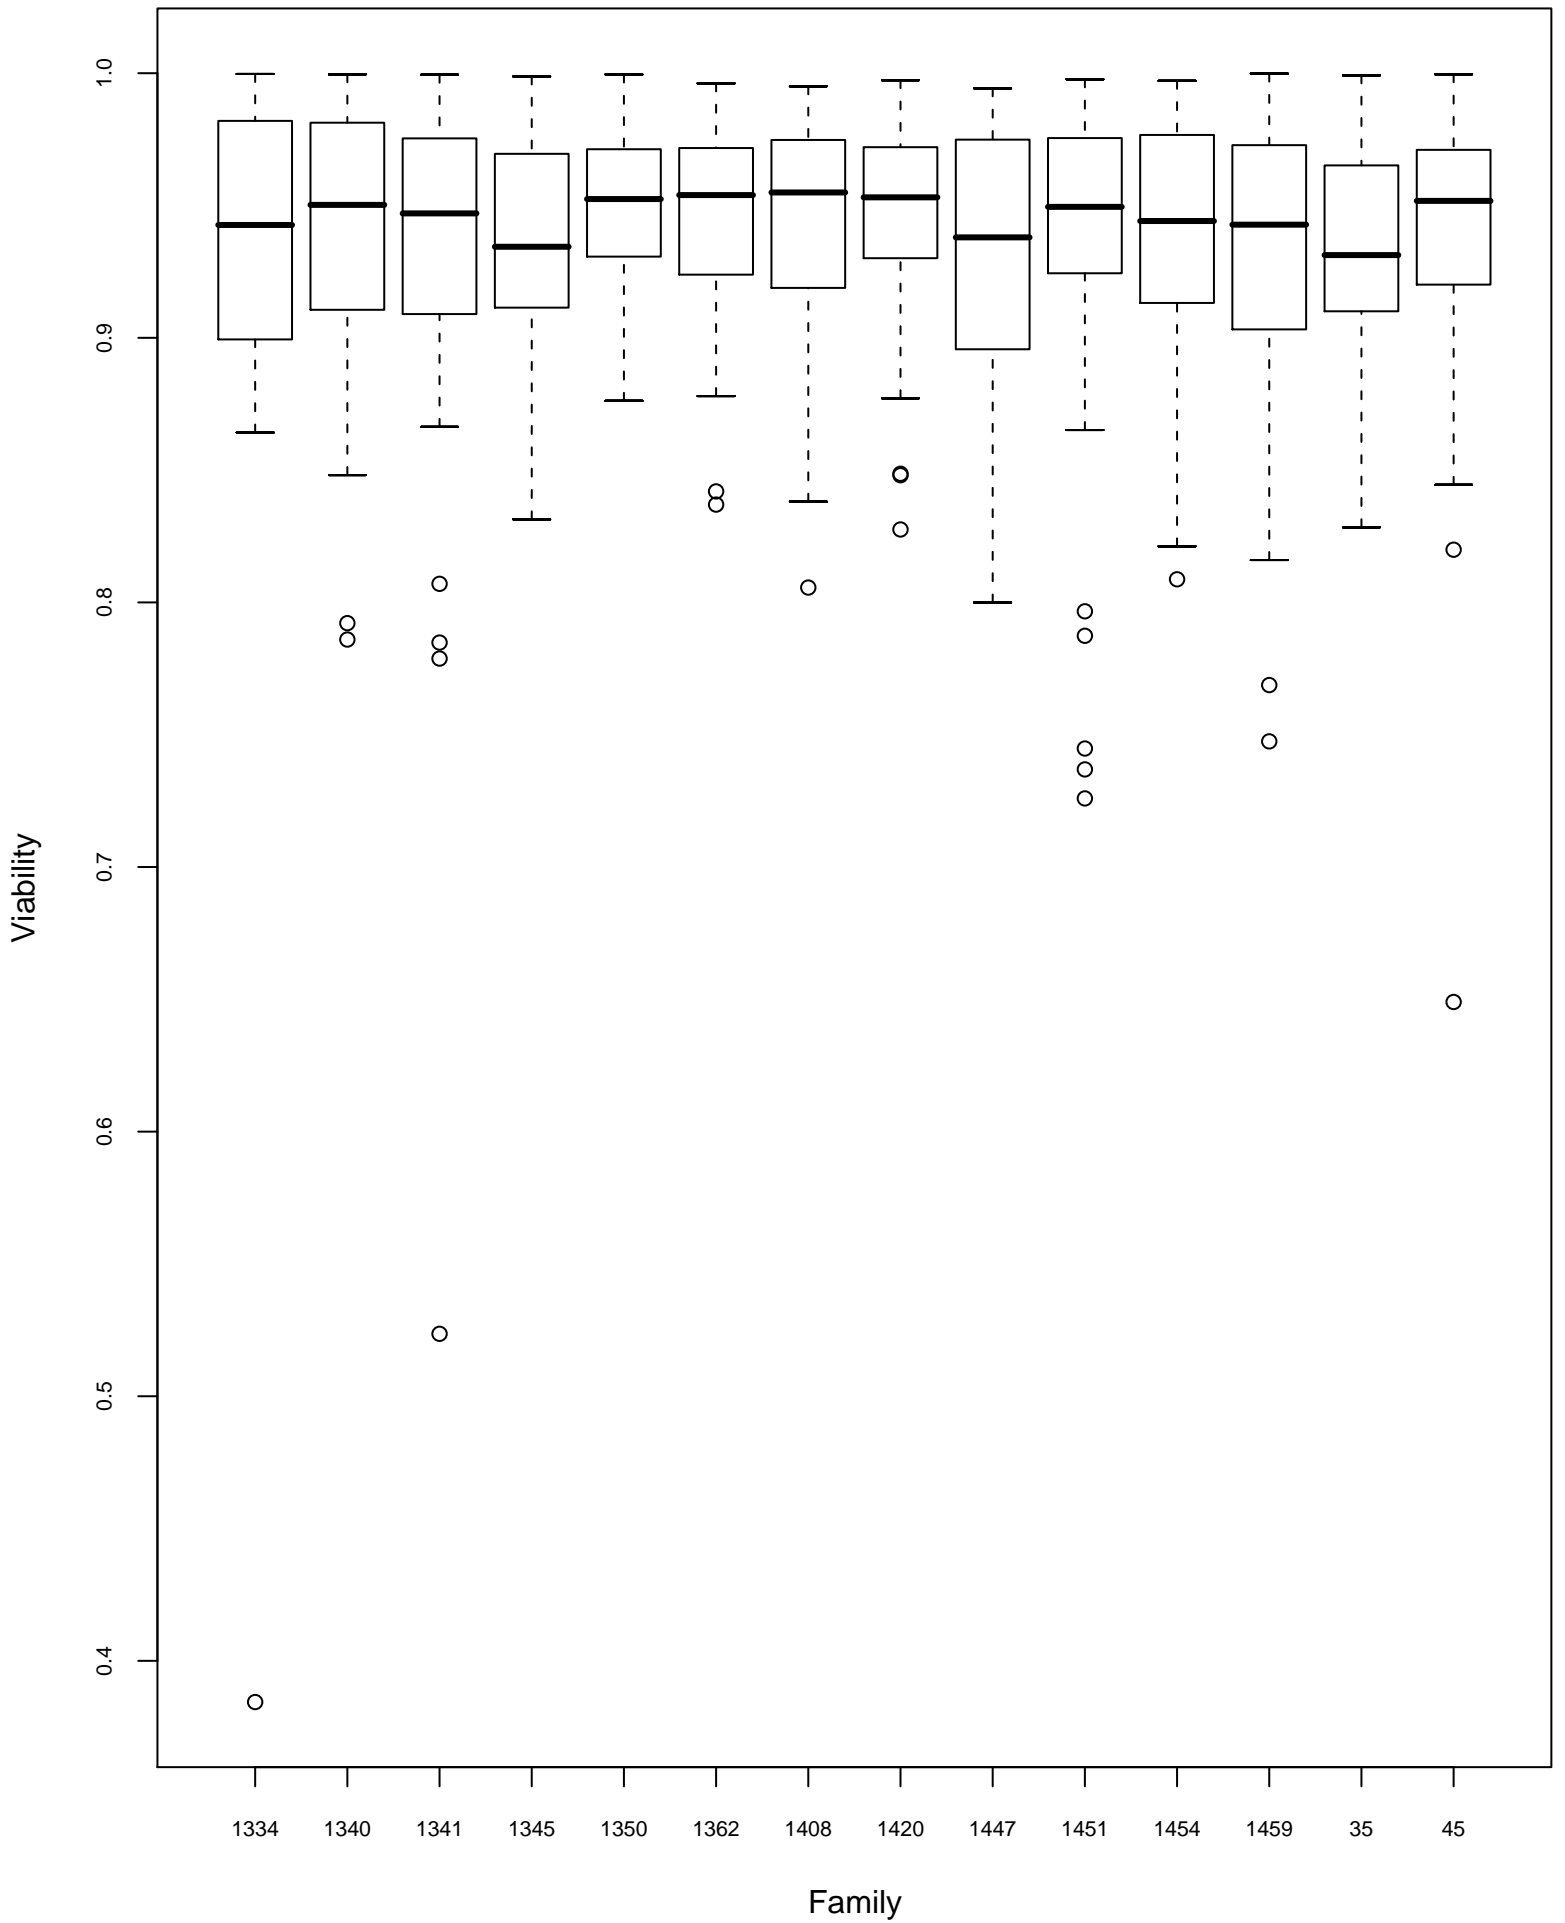

# Drug SN38, dose 0.01 (mM)

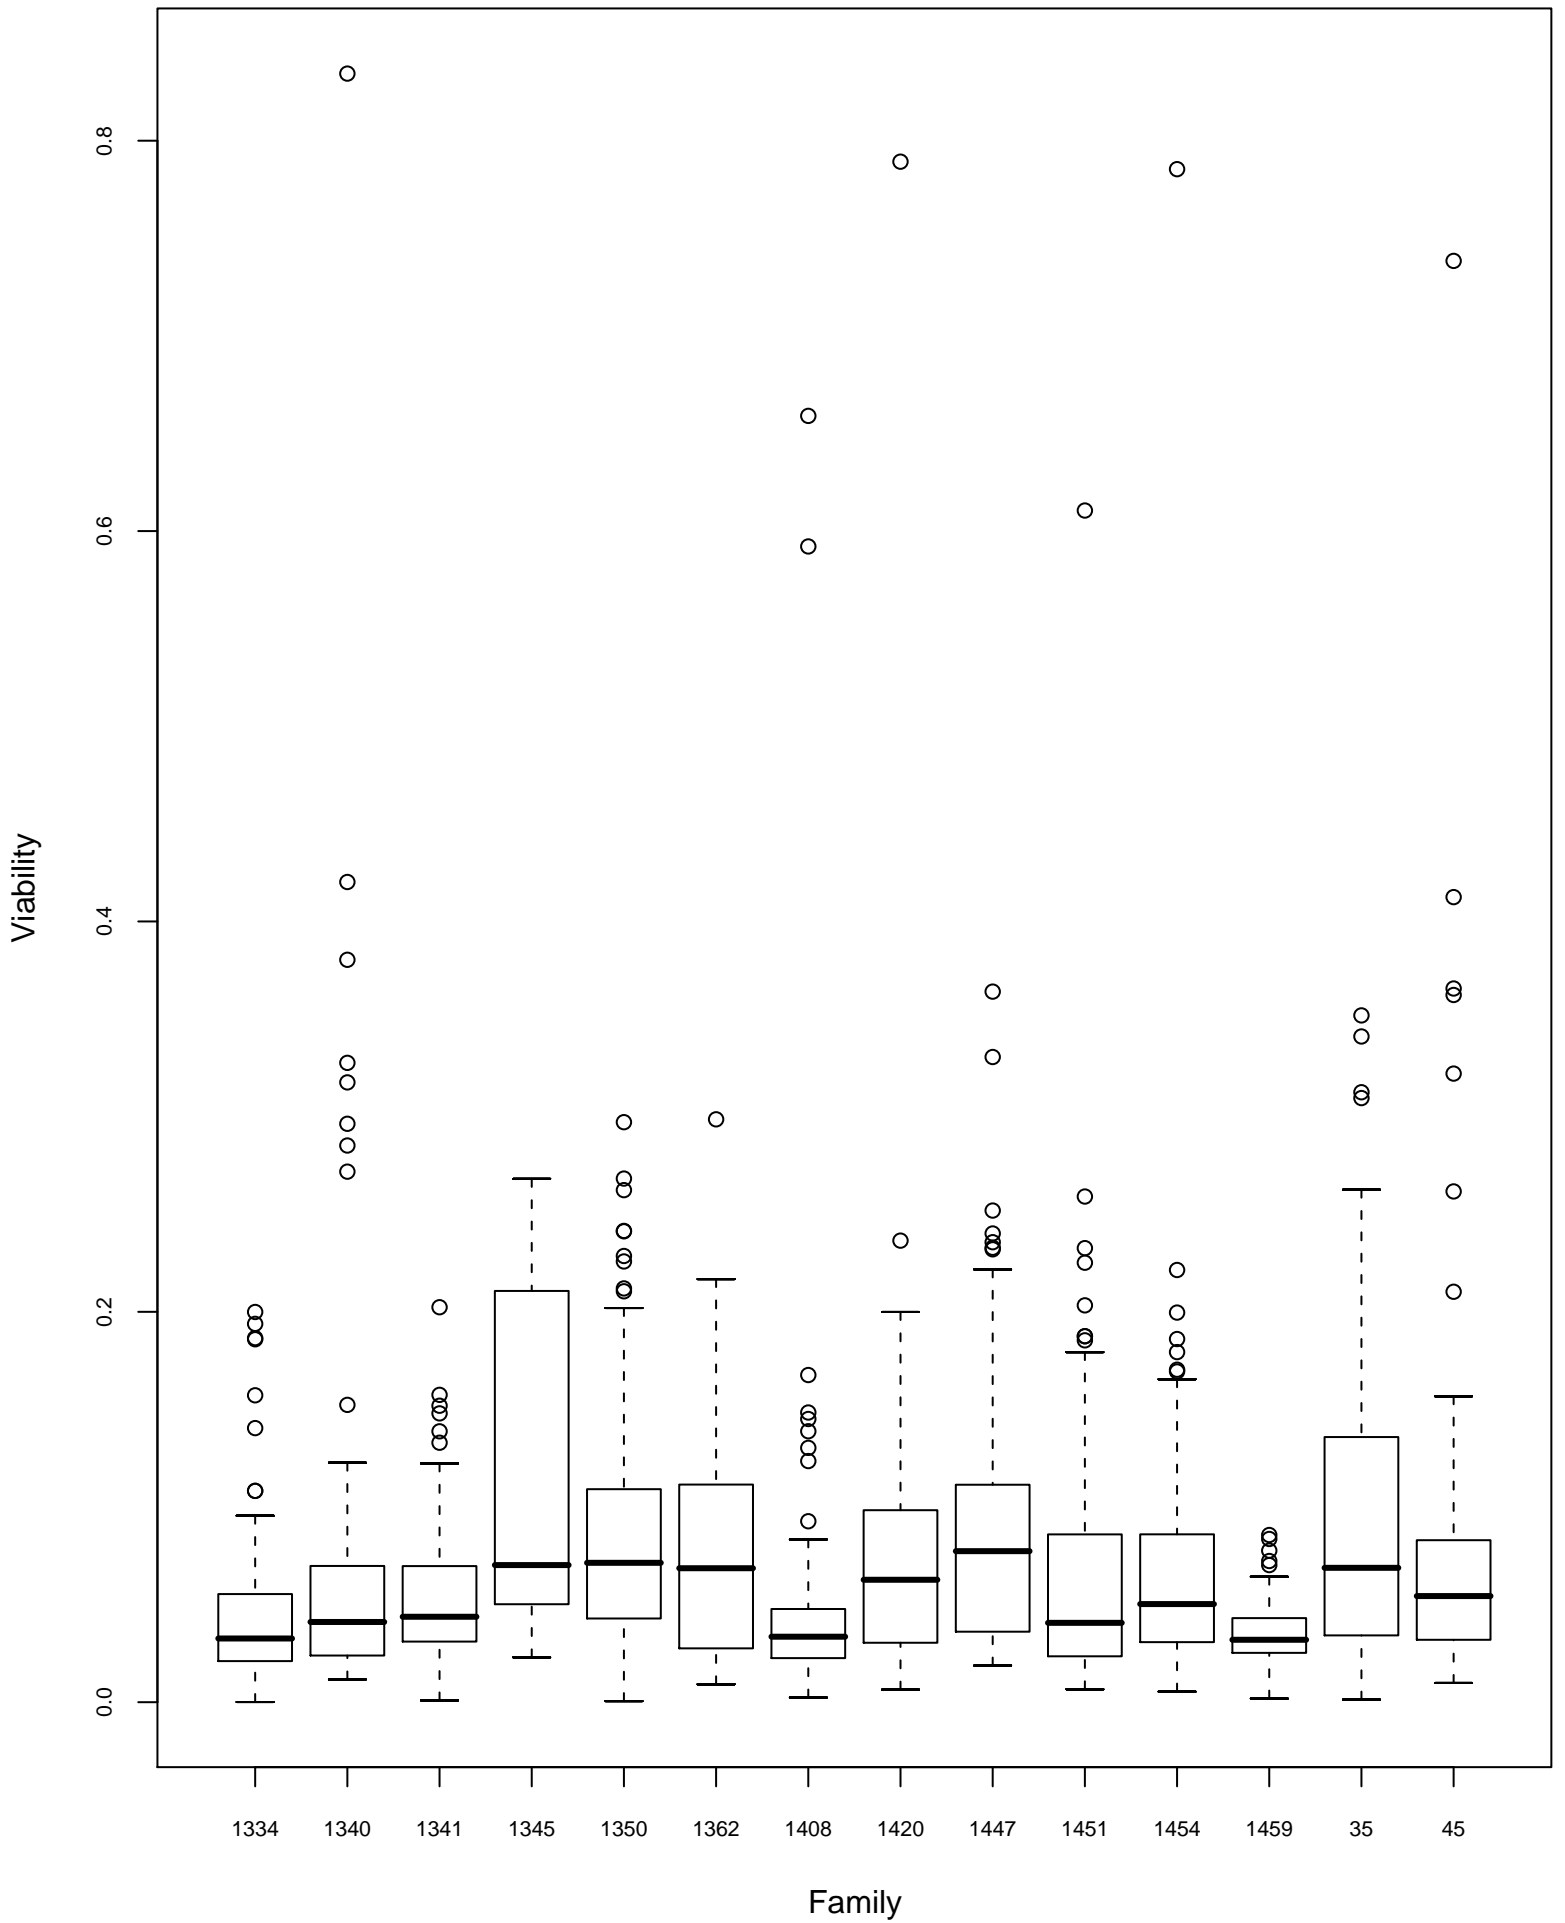

# Drug SN38, dose 0.002 (mM)

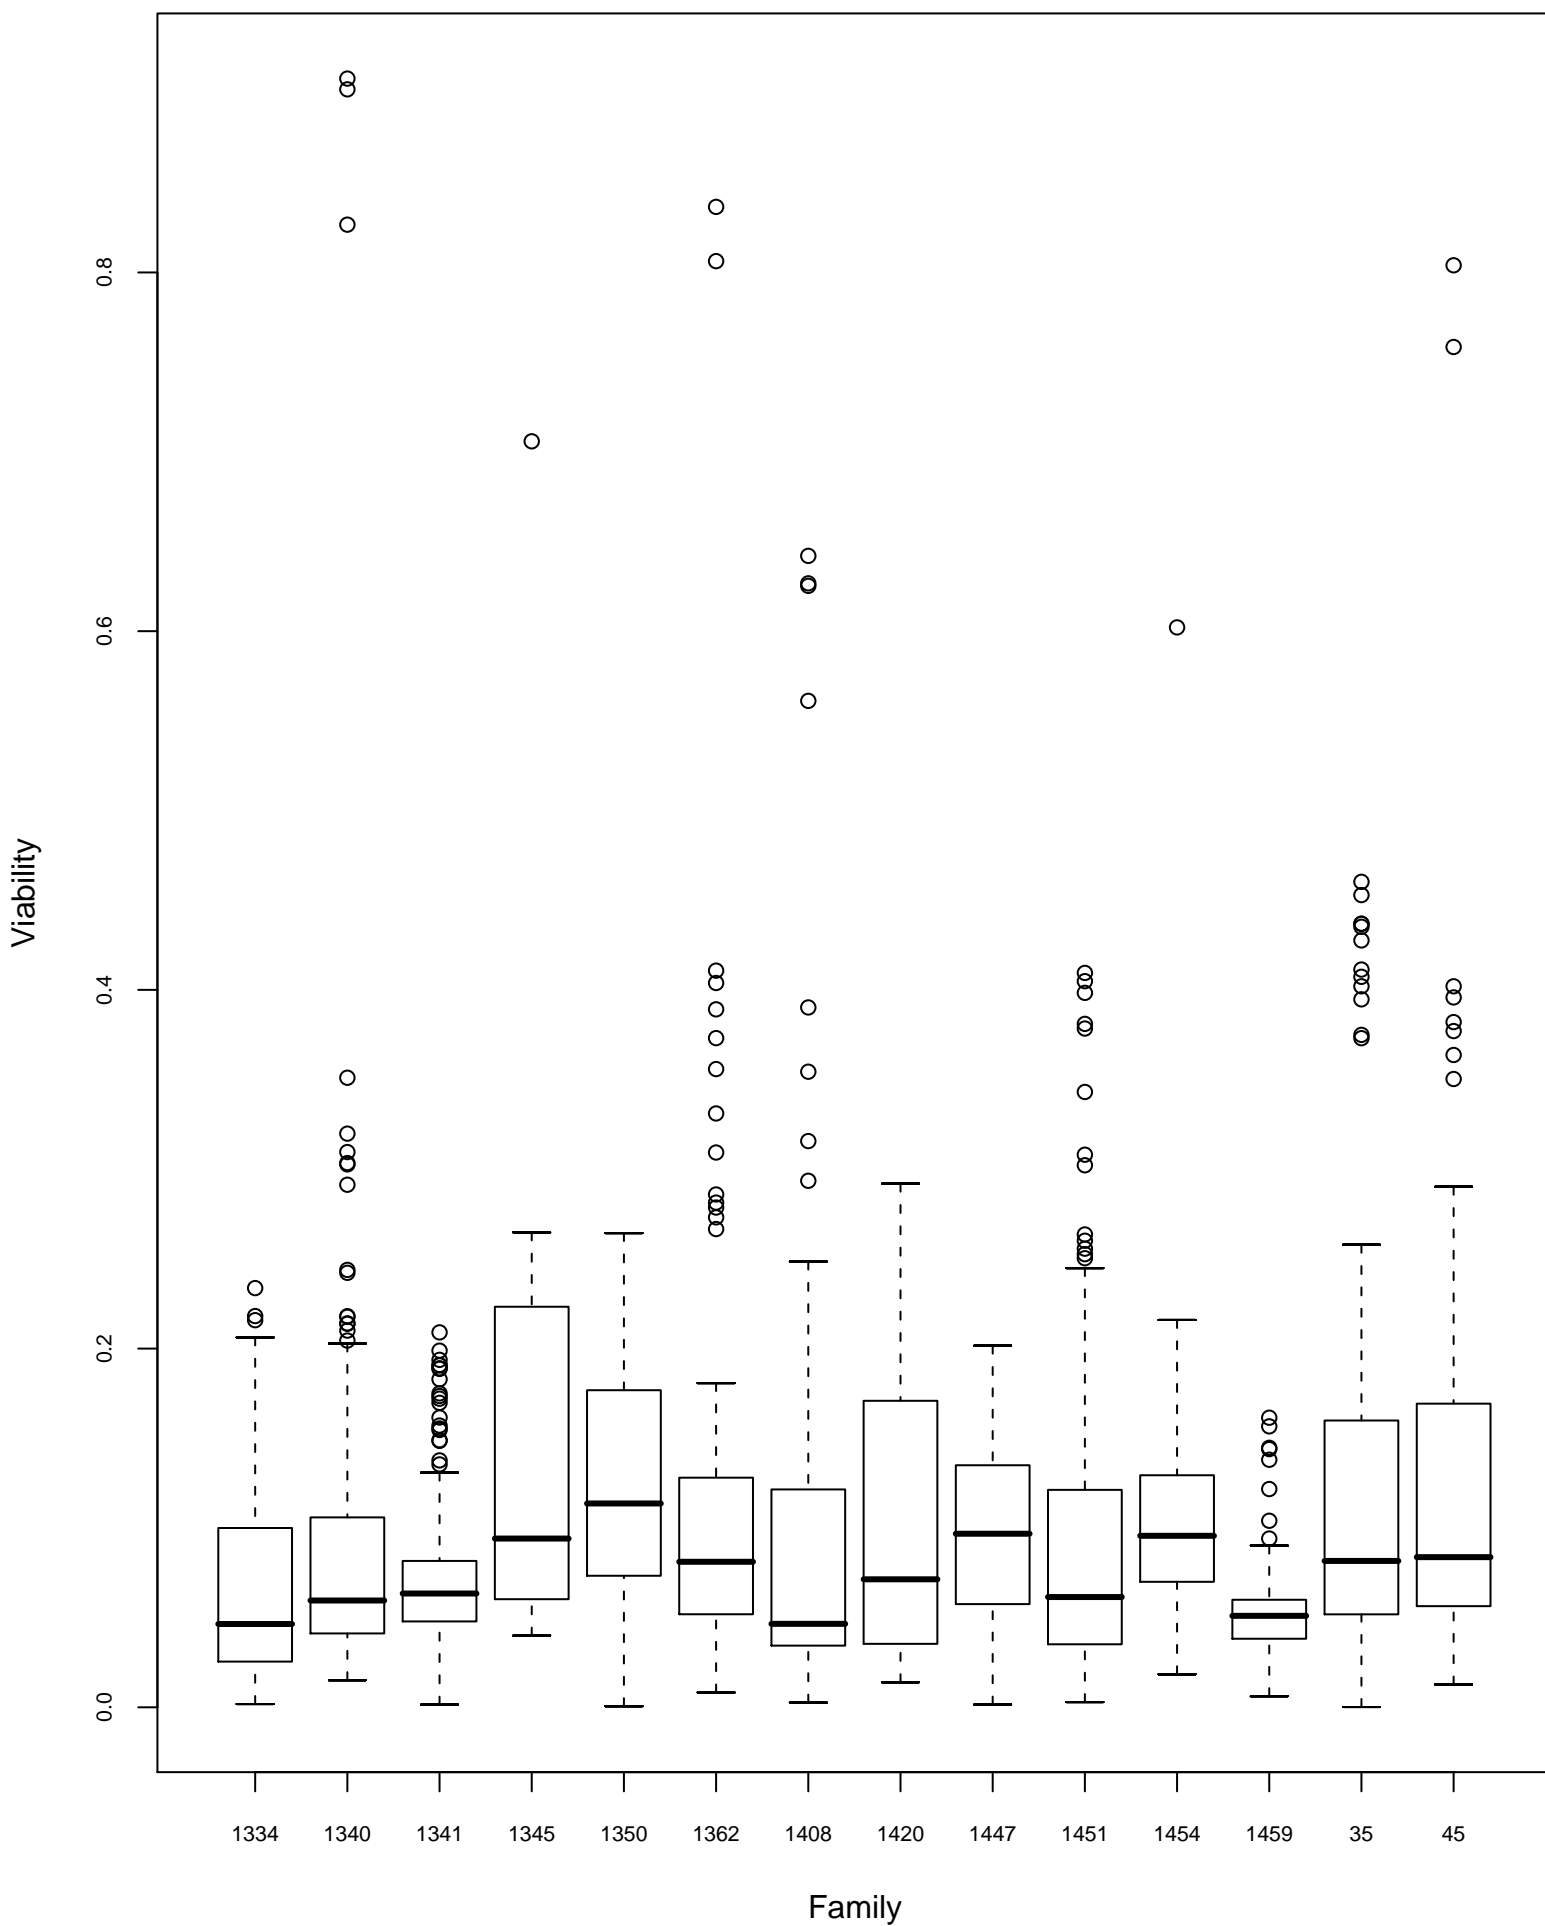

# Drug SN38, dose 8e-05 (mM)

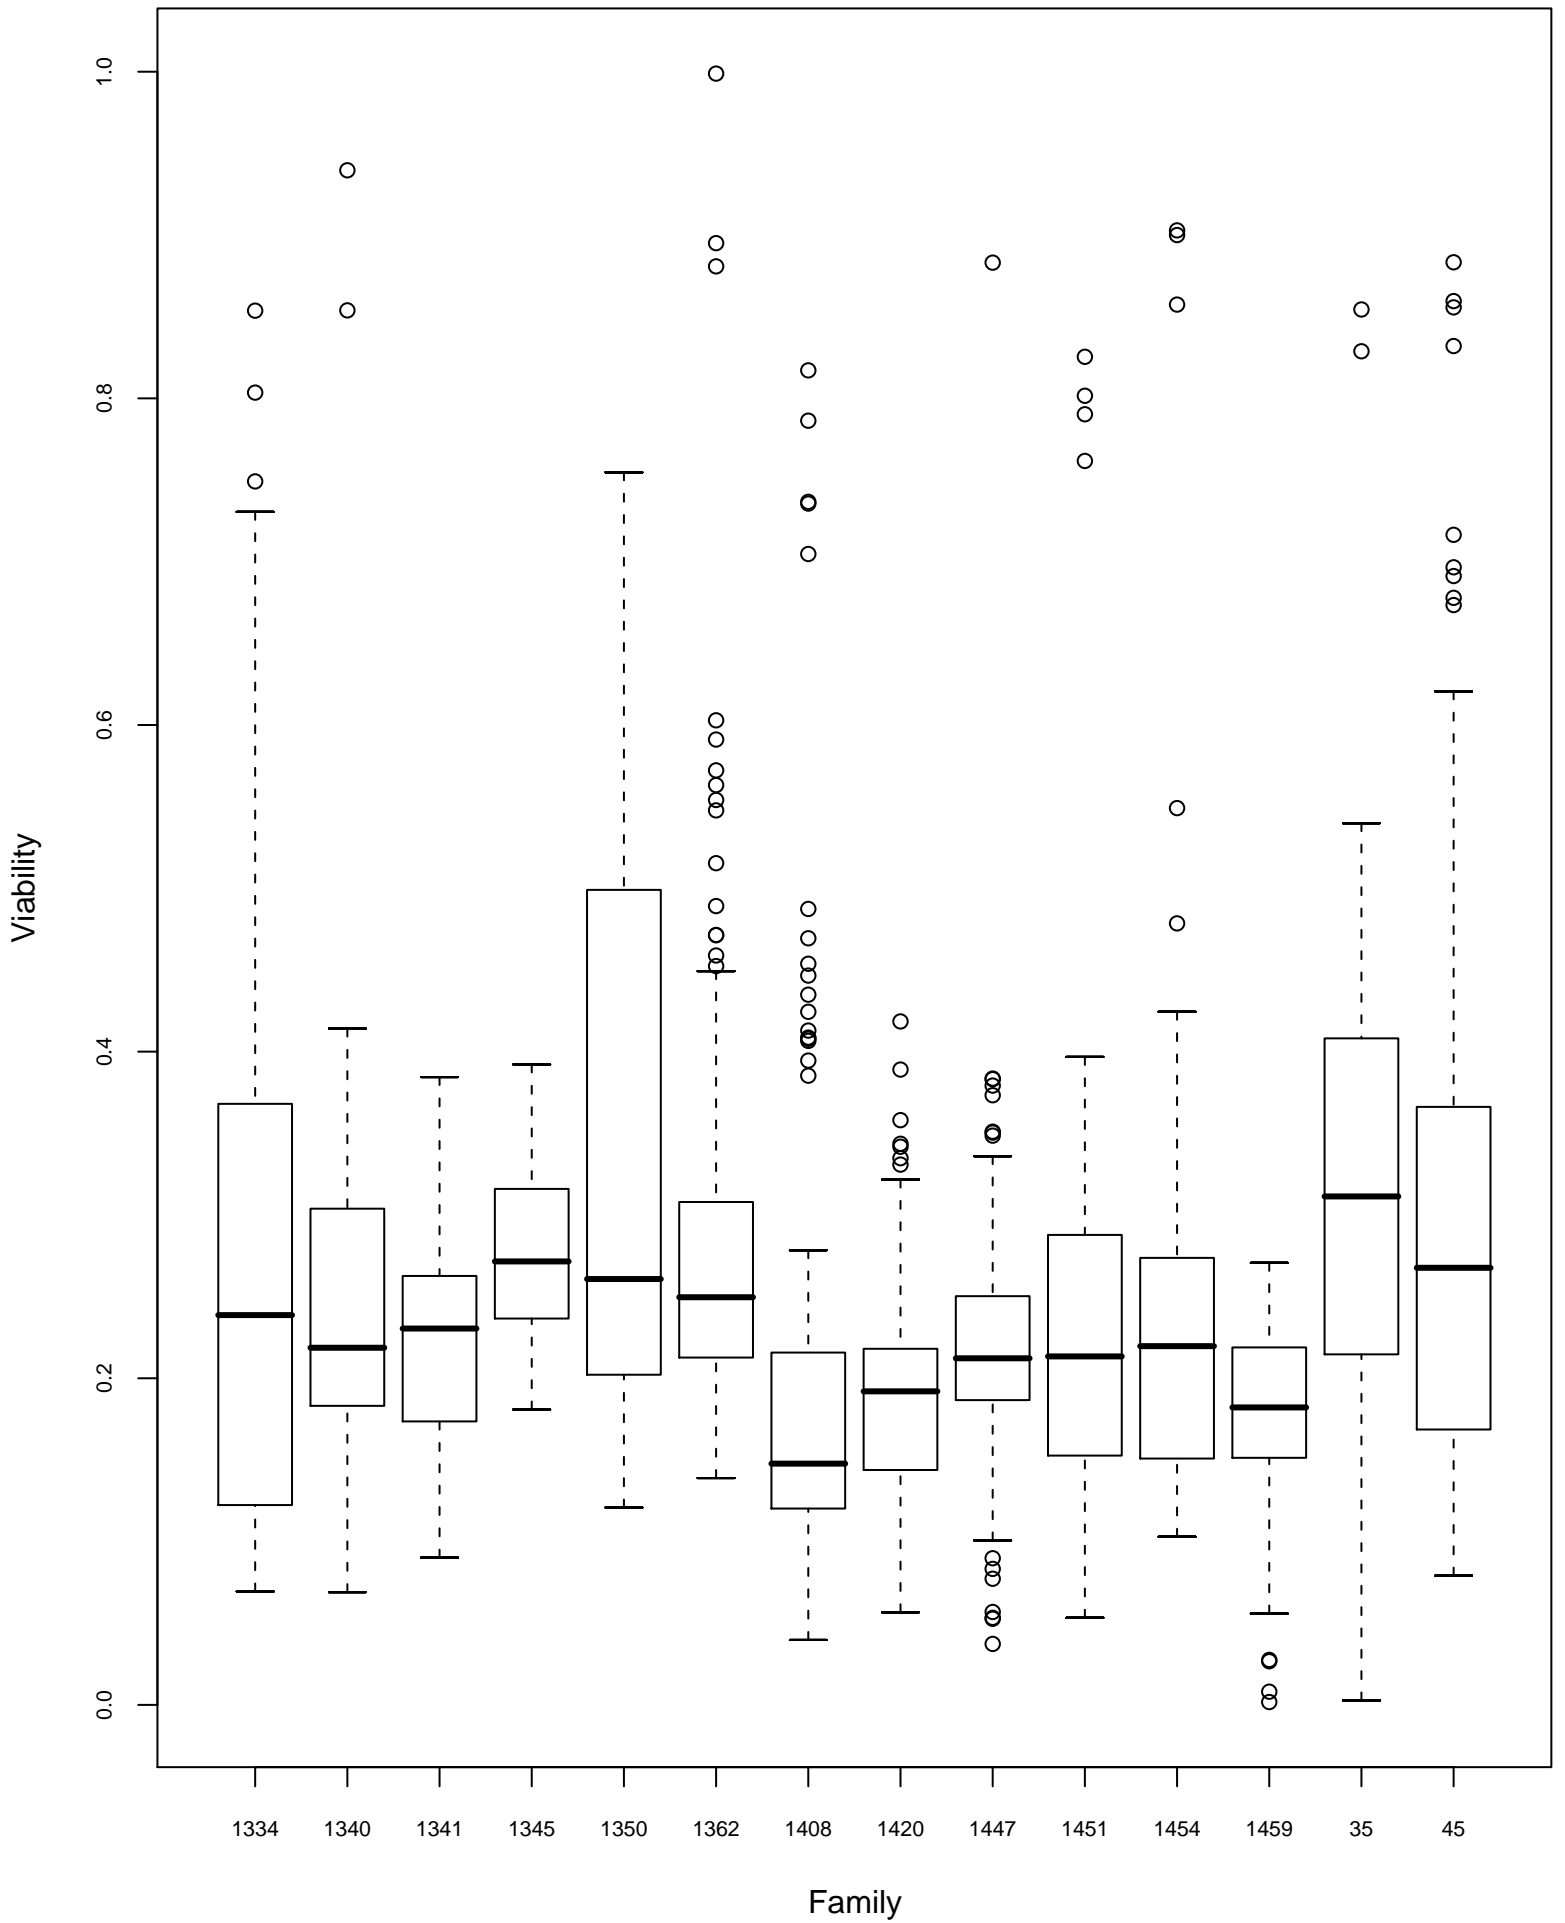

# Drug SN38, dose 8e-06 (mM)

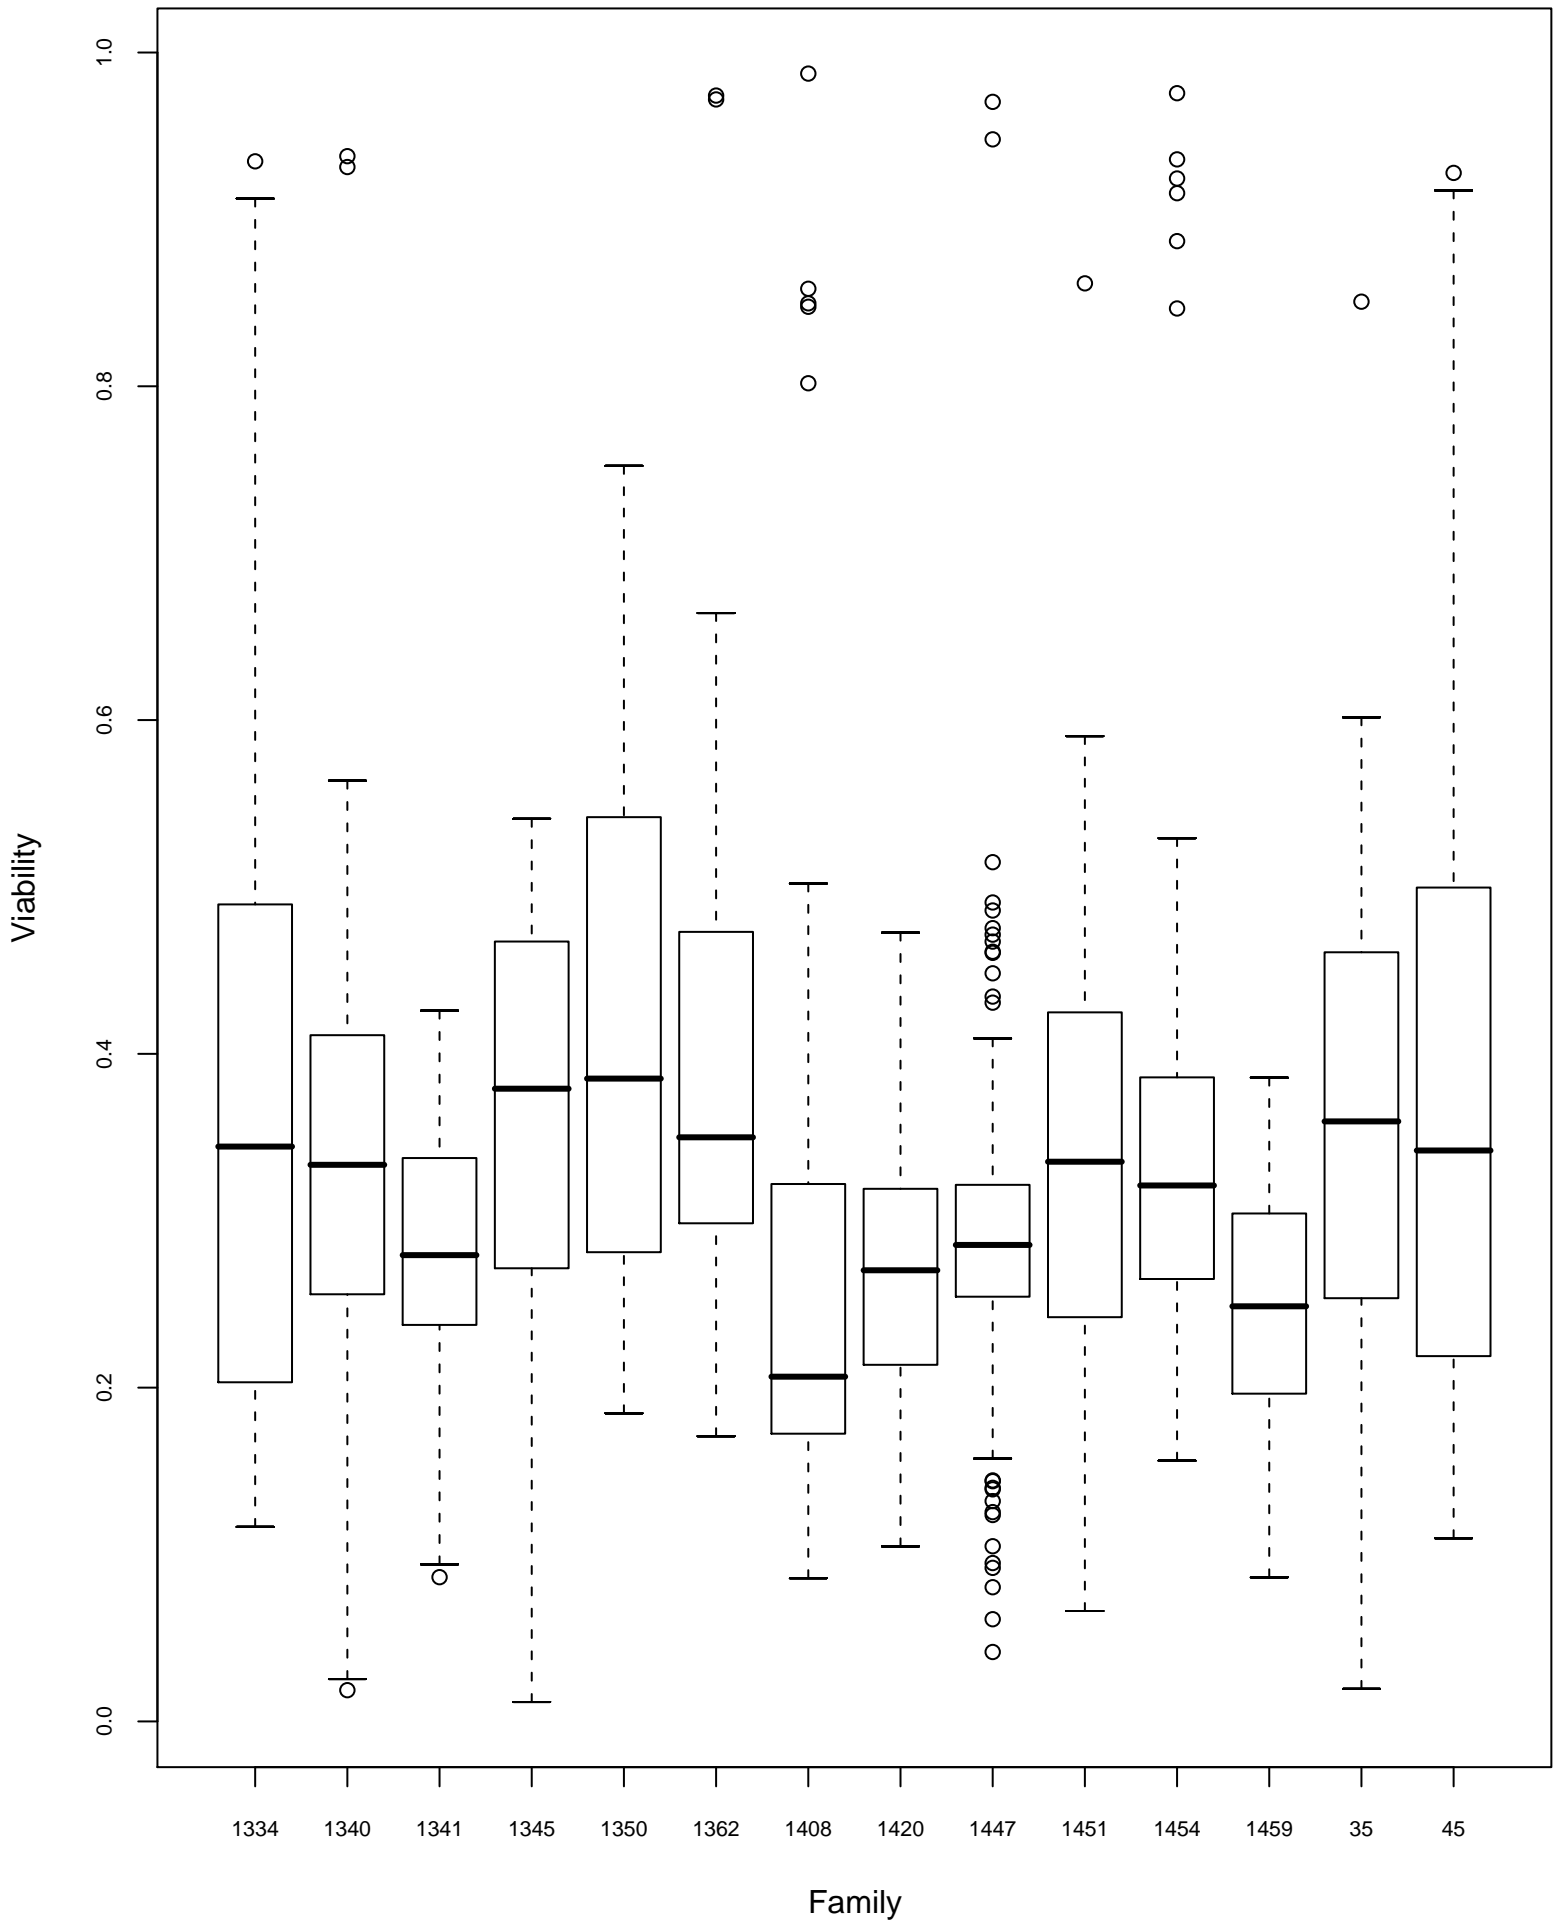



# Drug SN38, dose 5e-06 (mM)

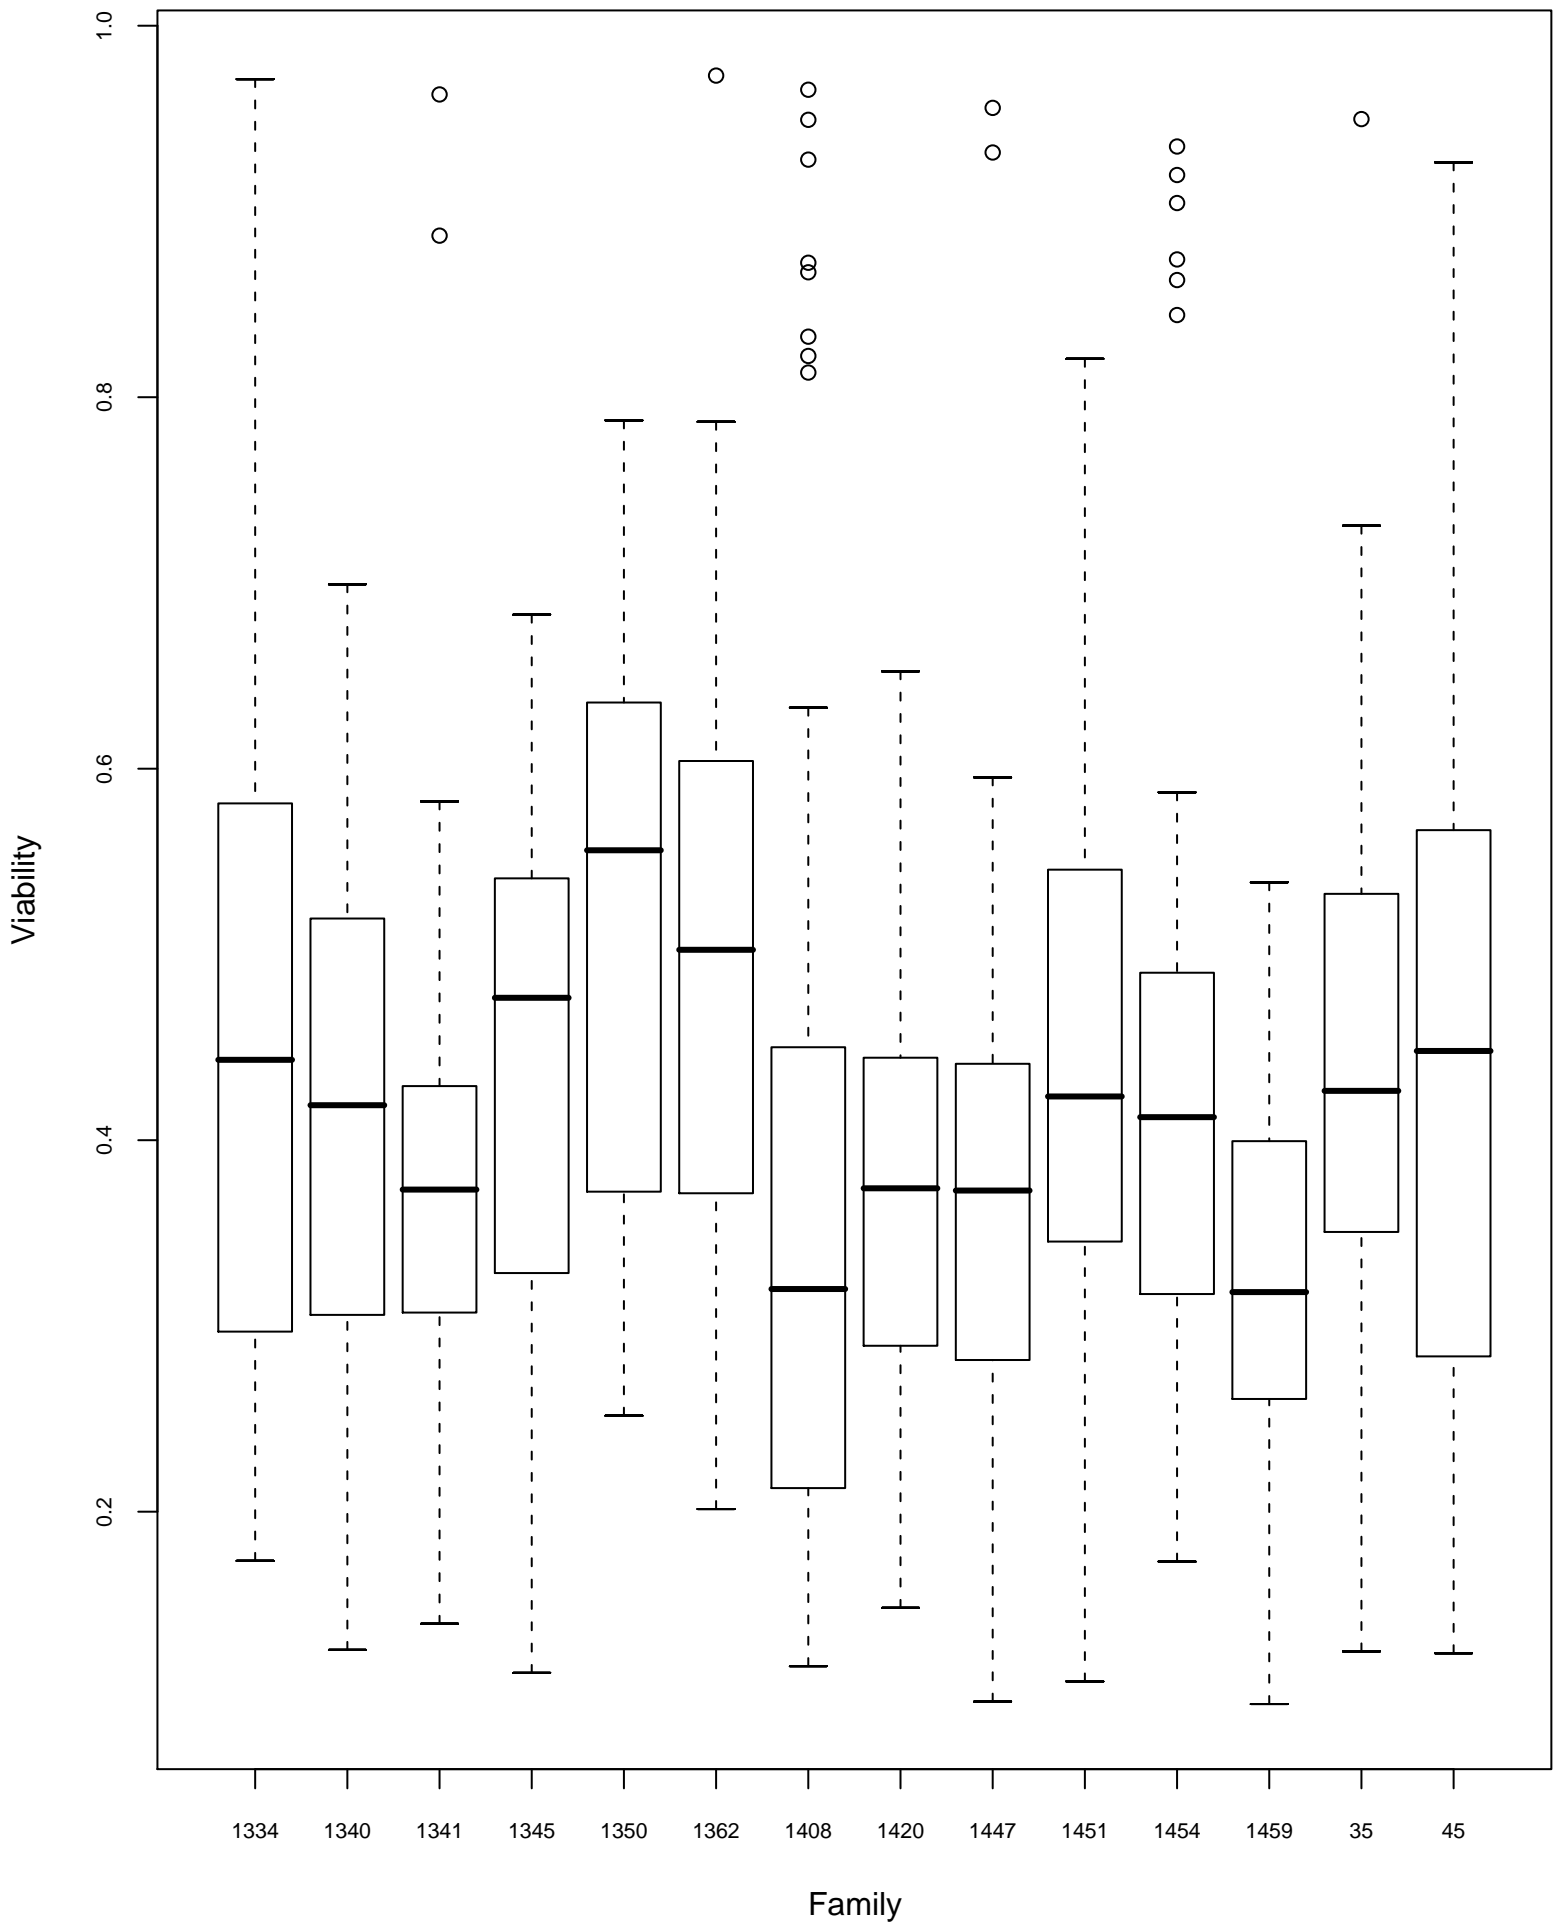

# Drug SN38, dose 3.01e-06 (mM)

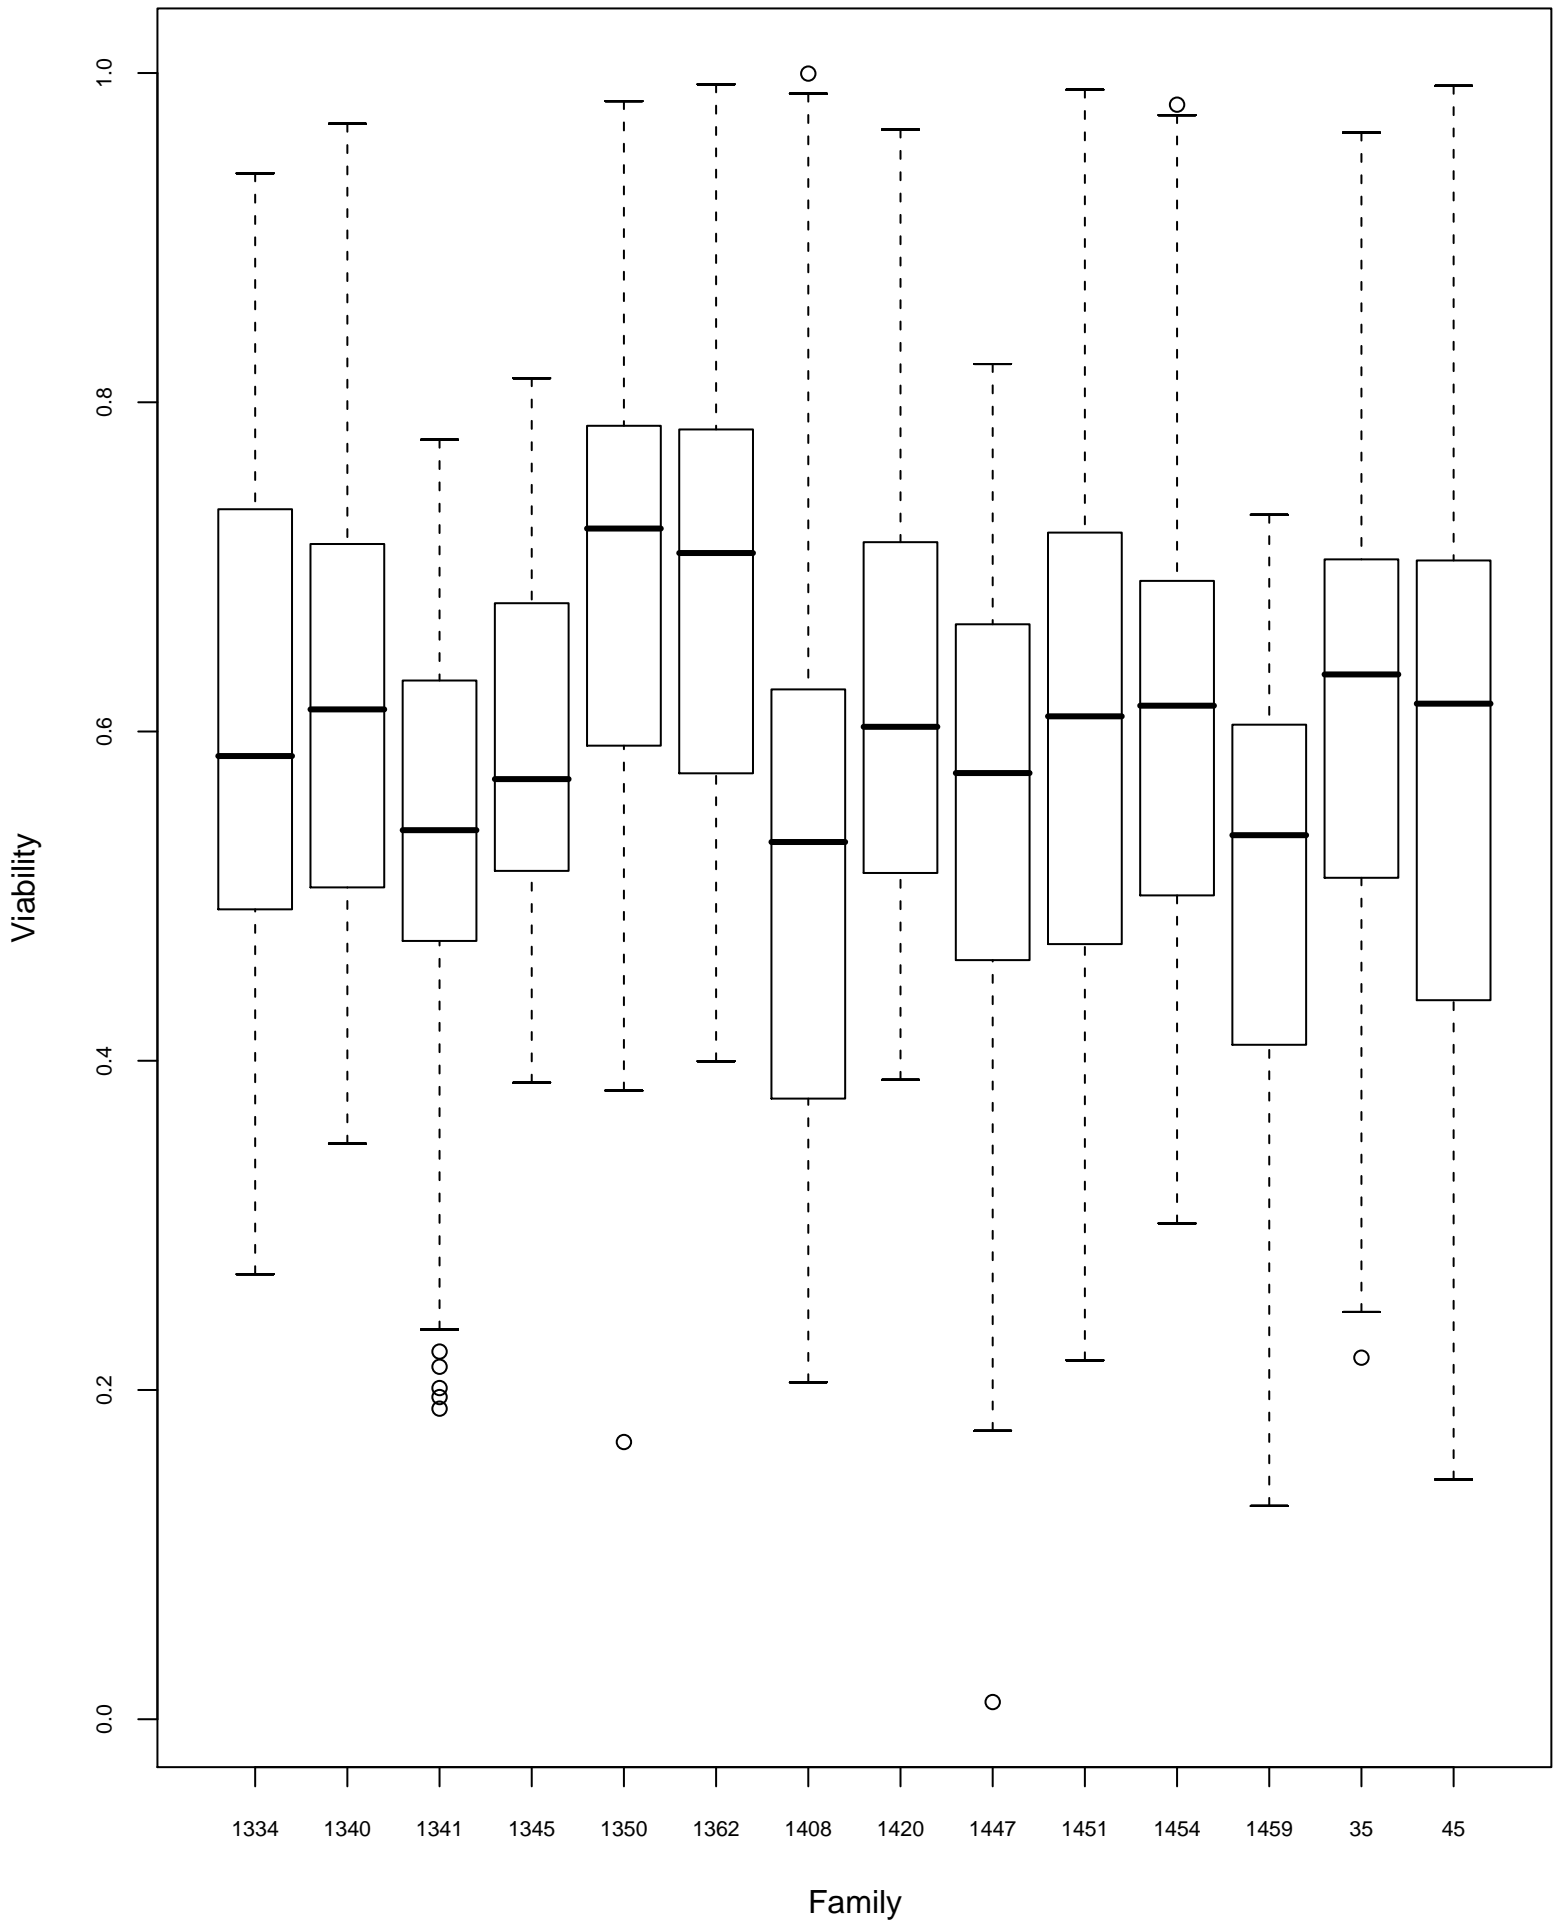

# Drug SN38, dose 2e-06 (mM)

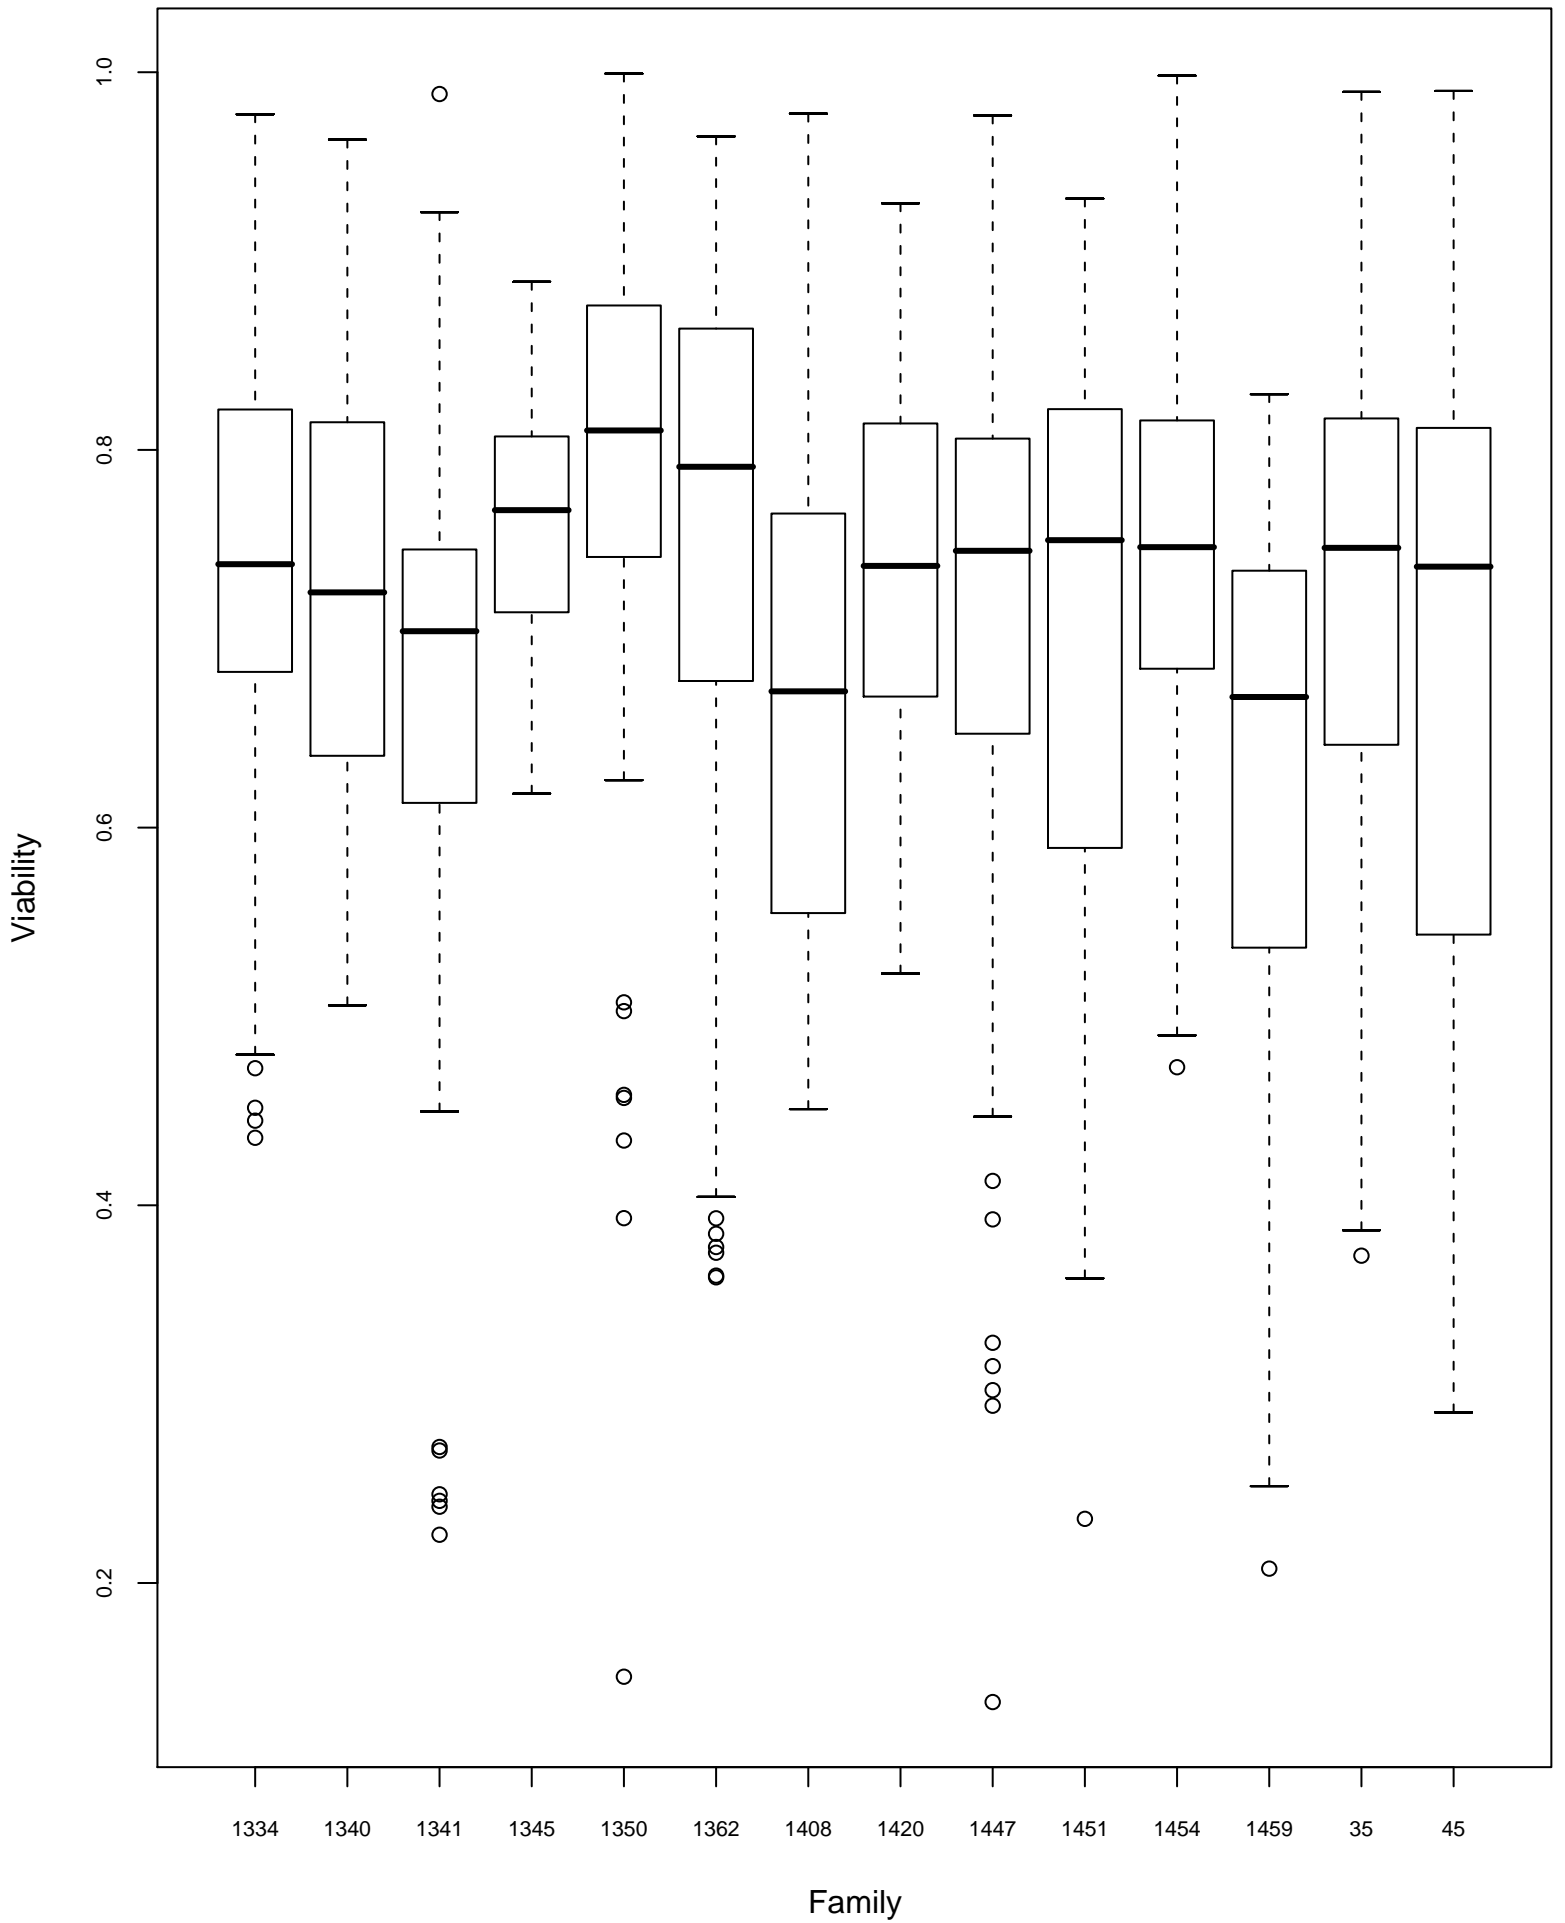

# Drug SN38, dose 1e-07 (mM)

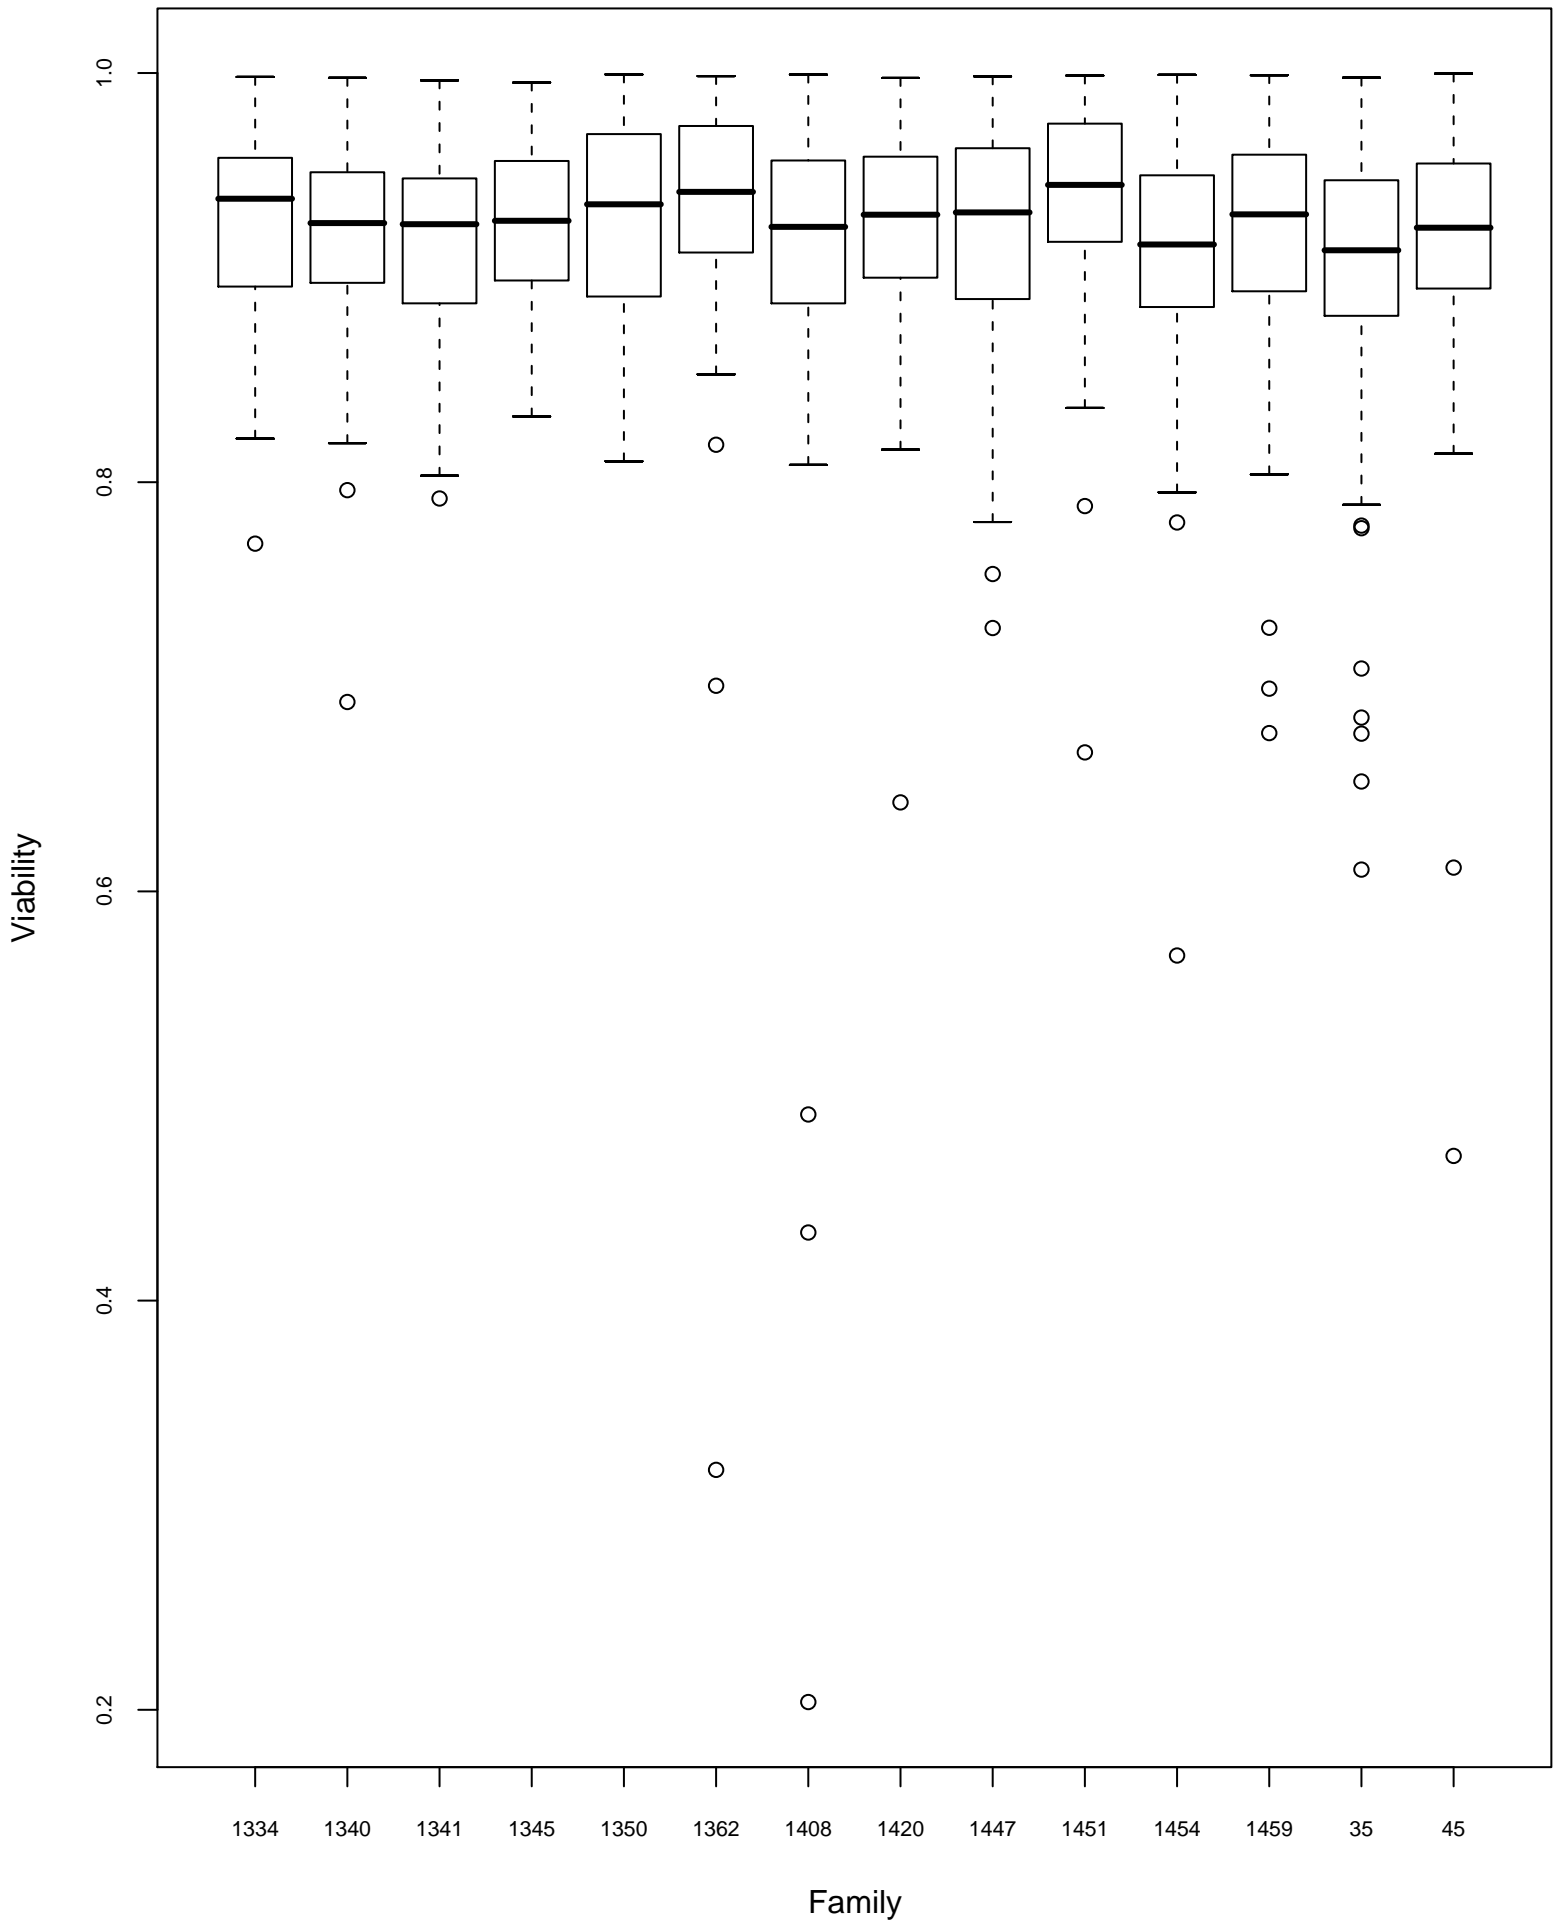

# Drug SN38, dose 1e-08 (mM)

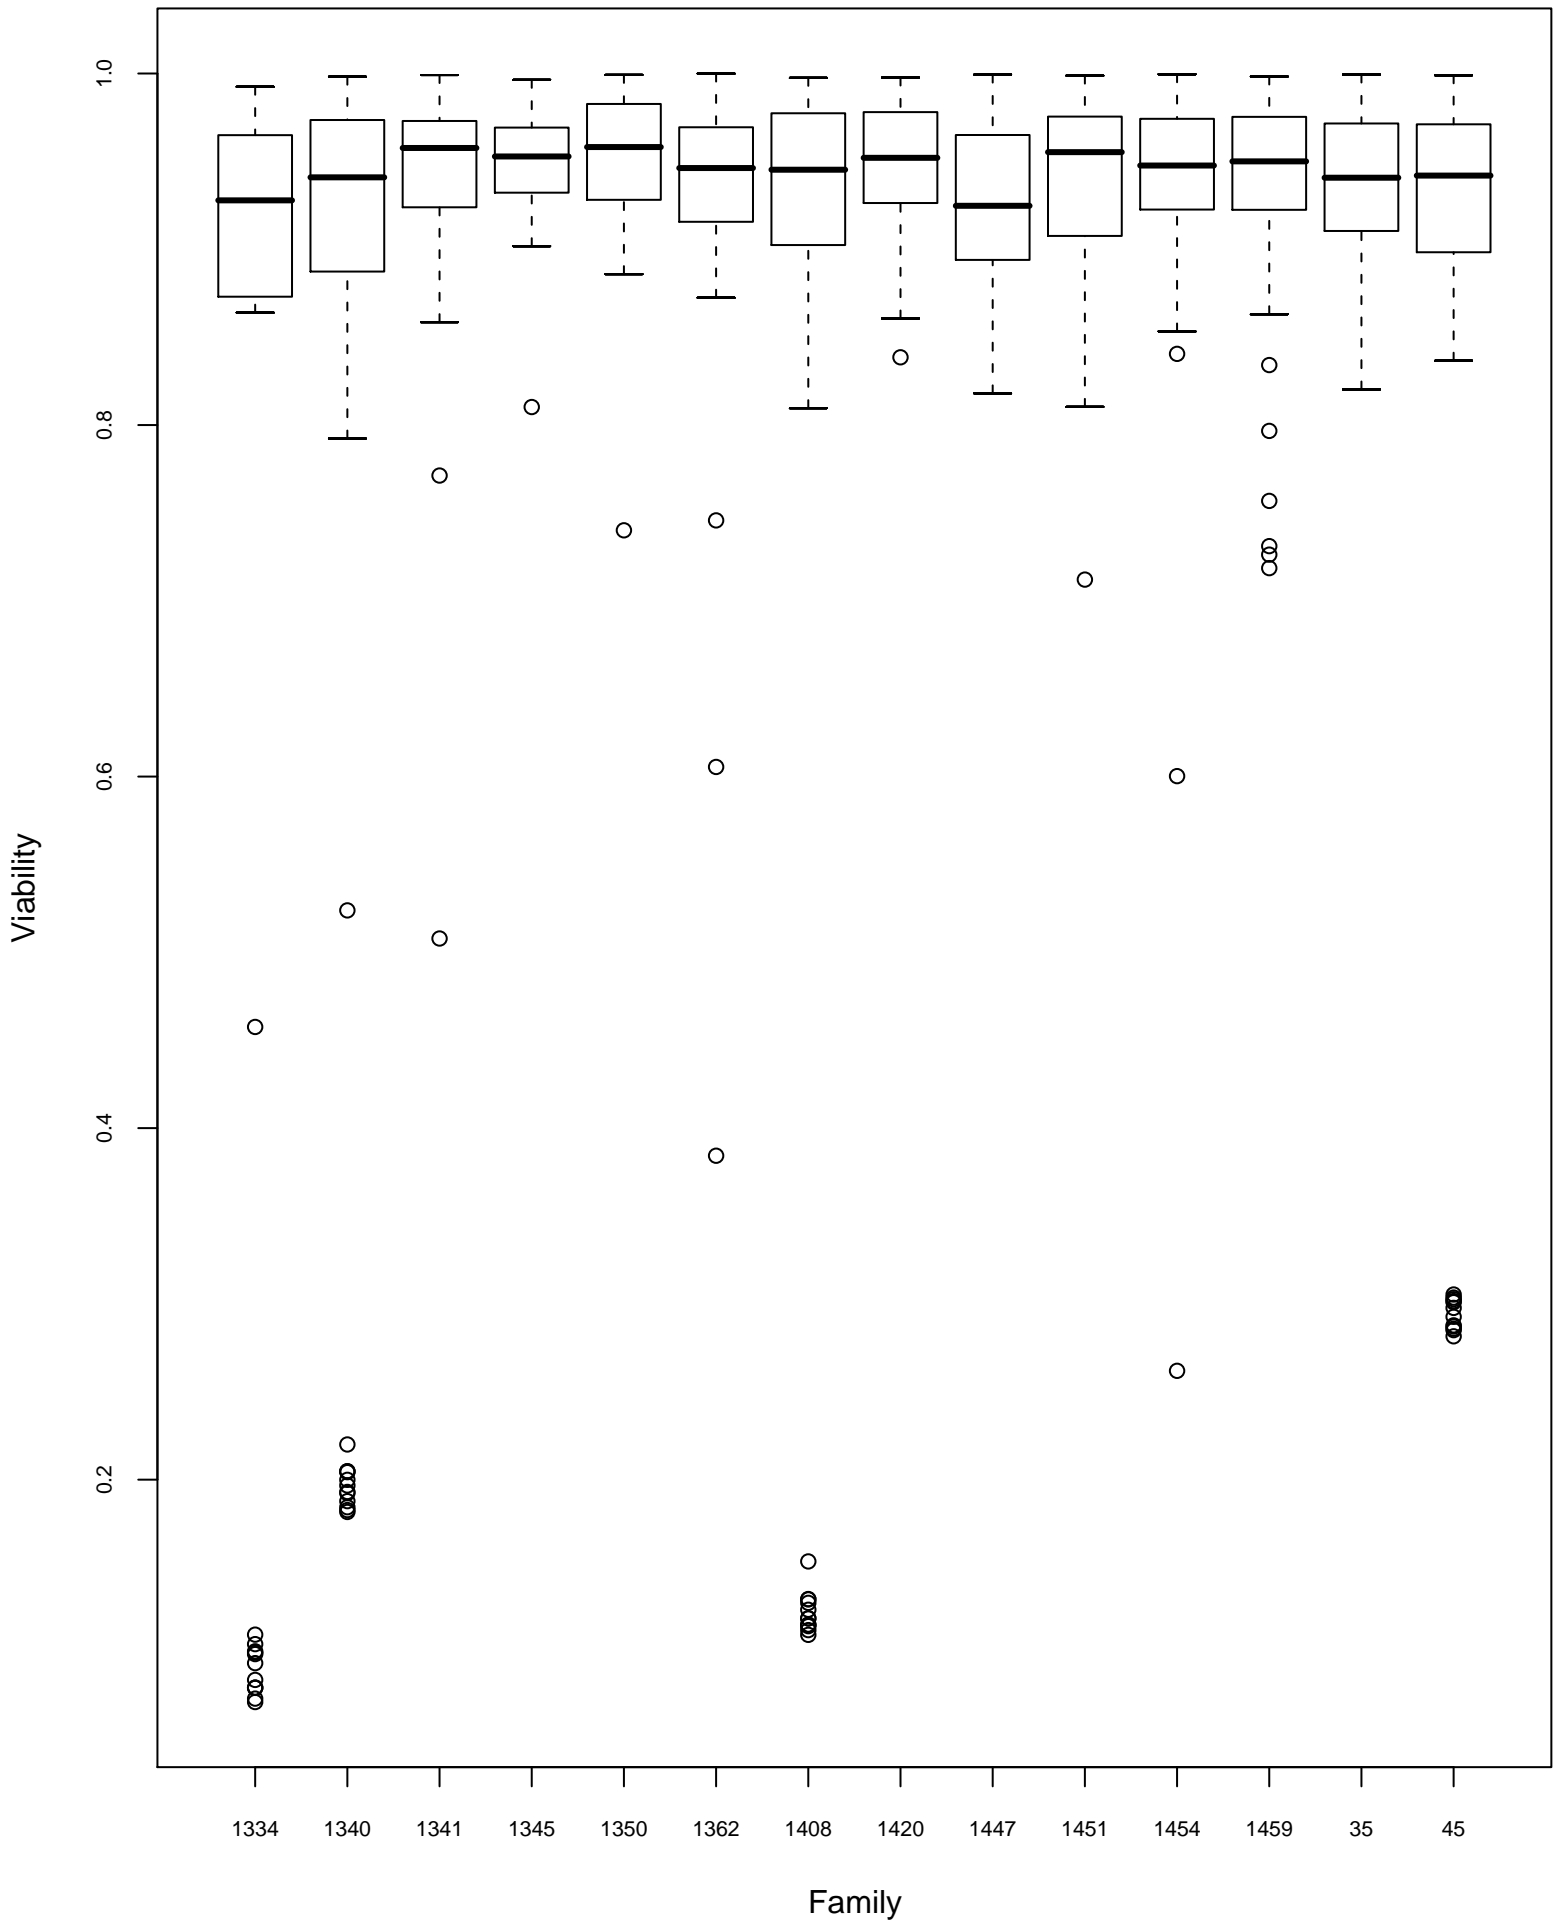

# Drug TPT, dose 0.01 (mM)

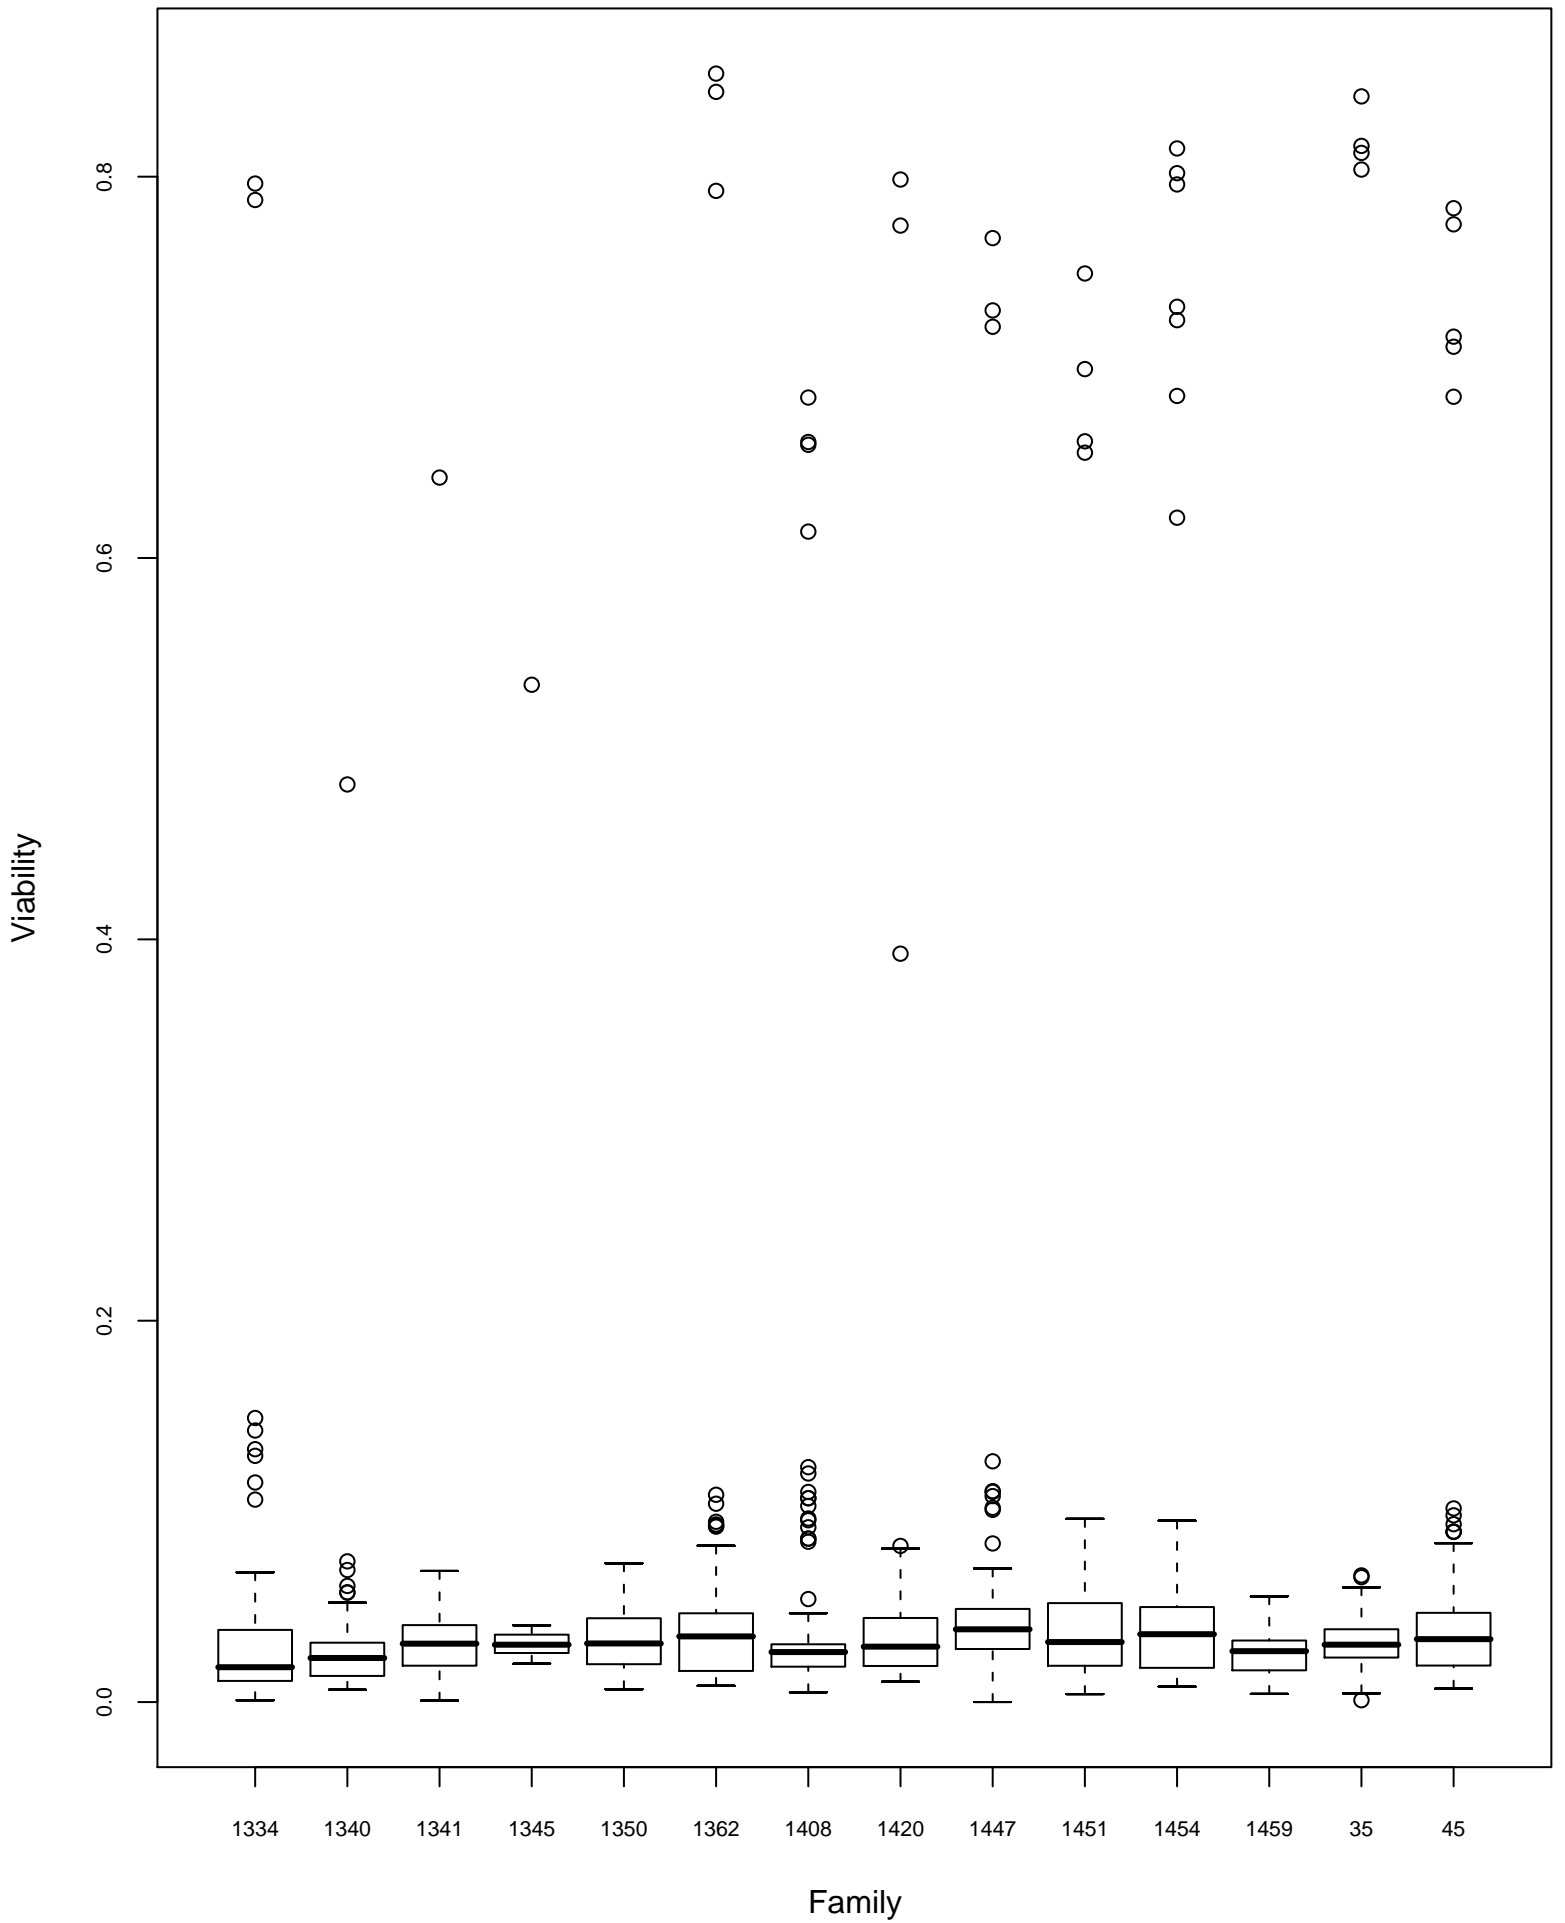

# Drug TPT, dose 0.002 (mM)

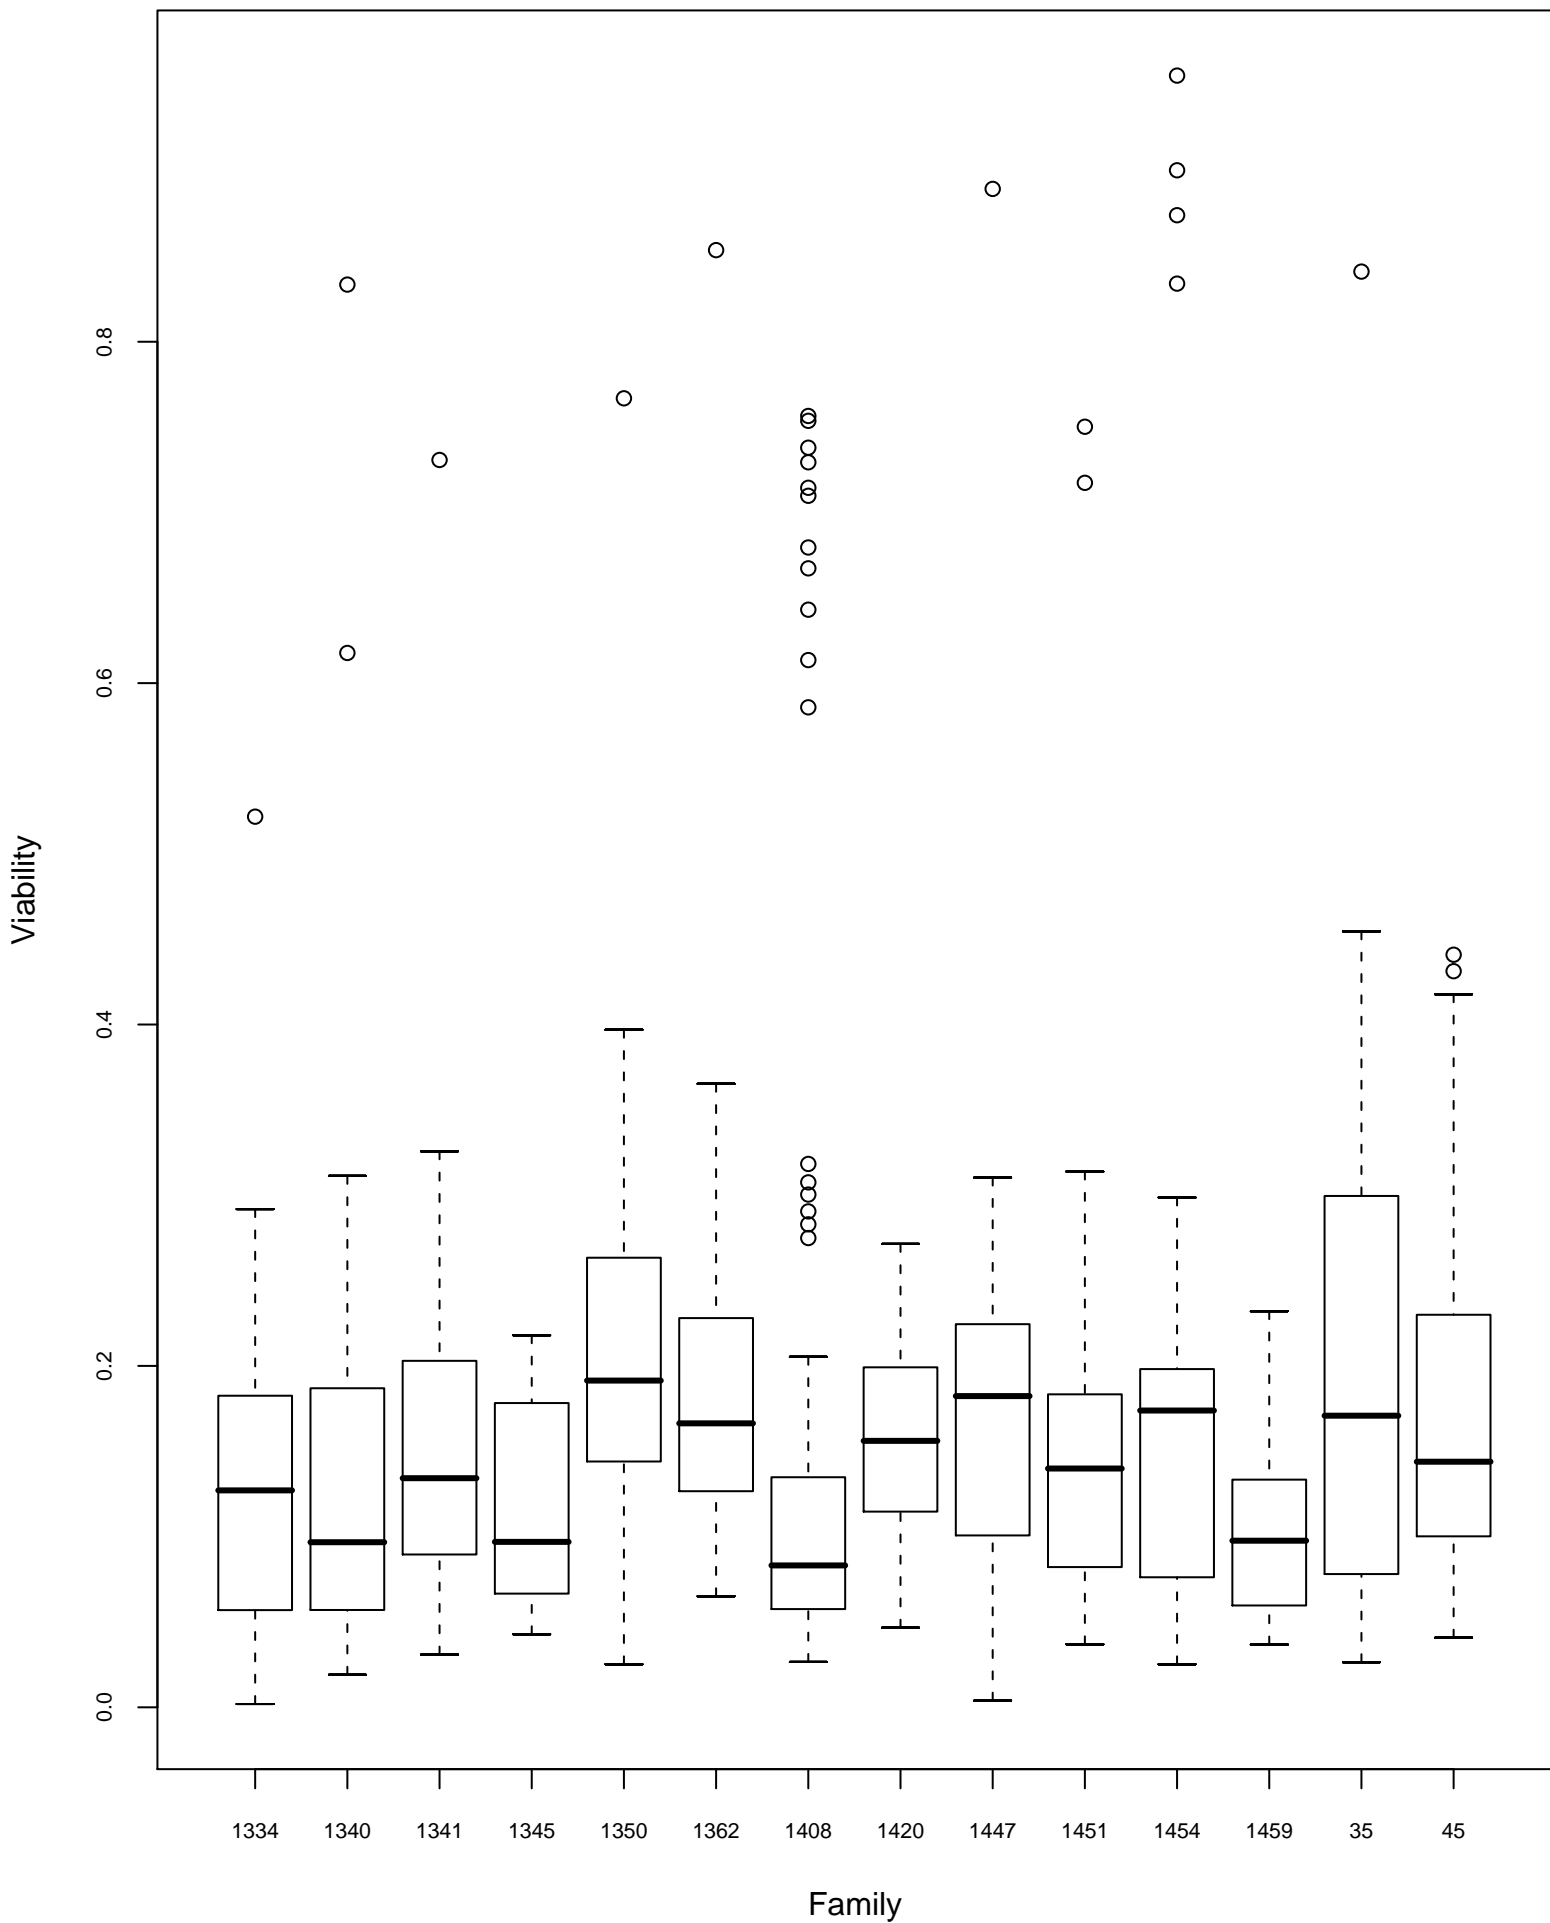

# Drug TPT, dose 8e-05 (mM)

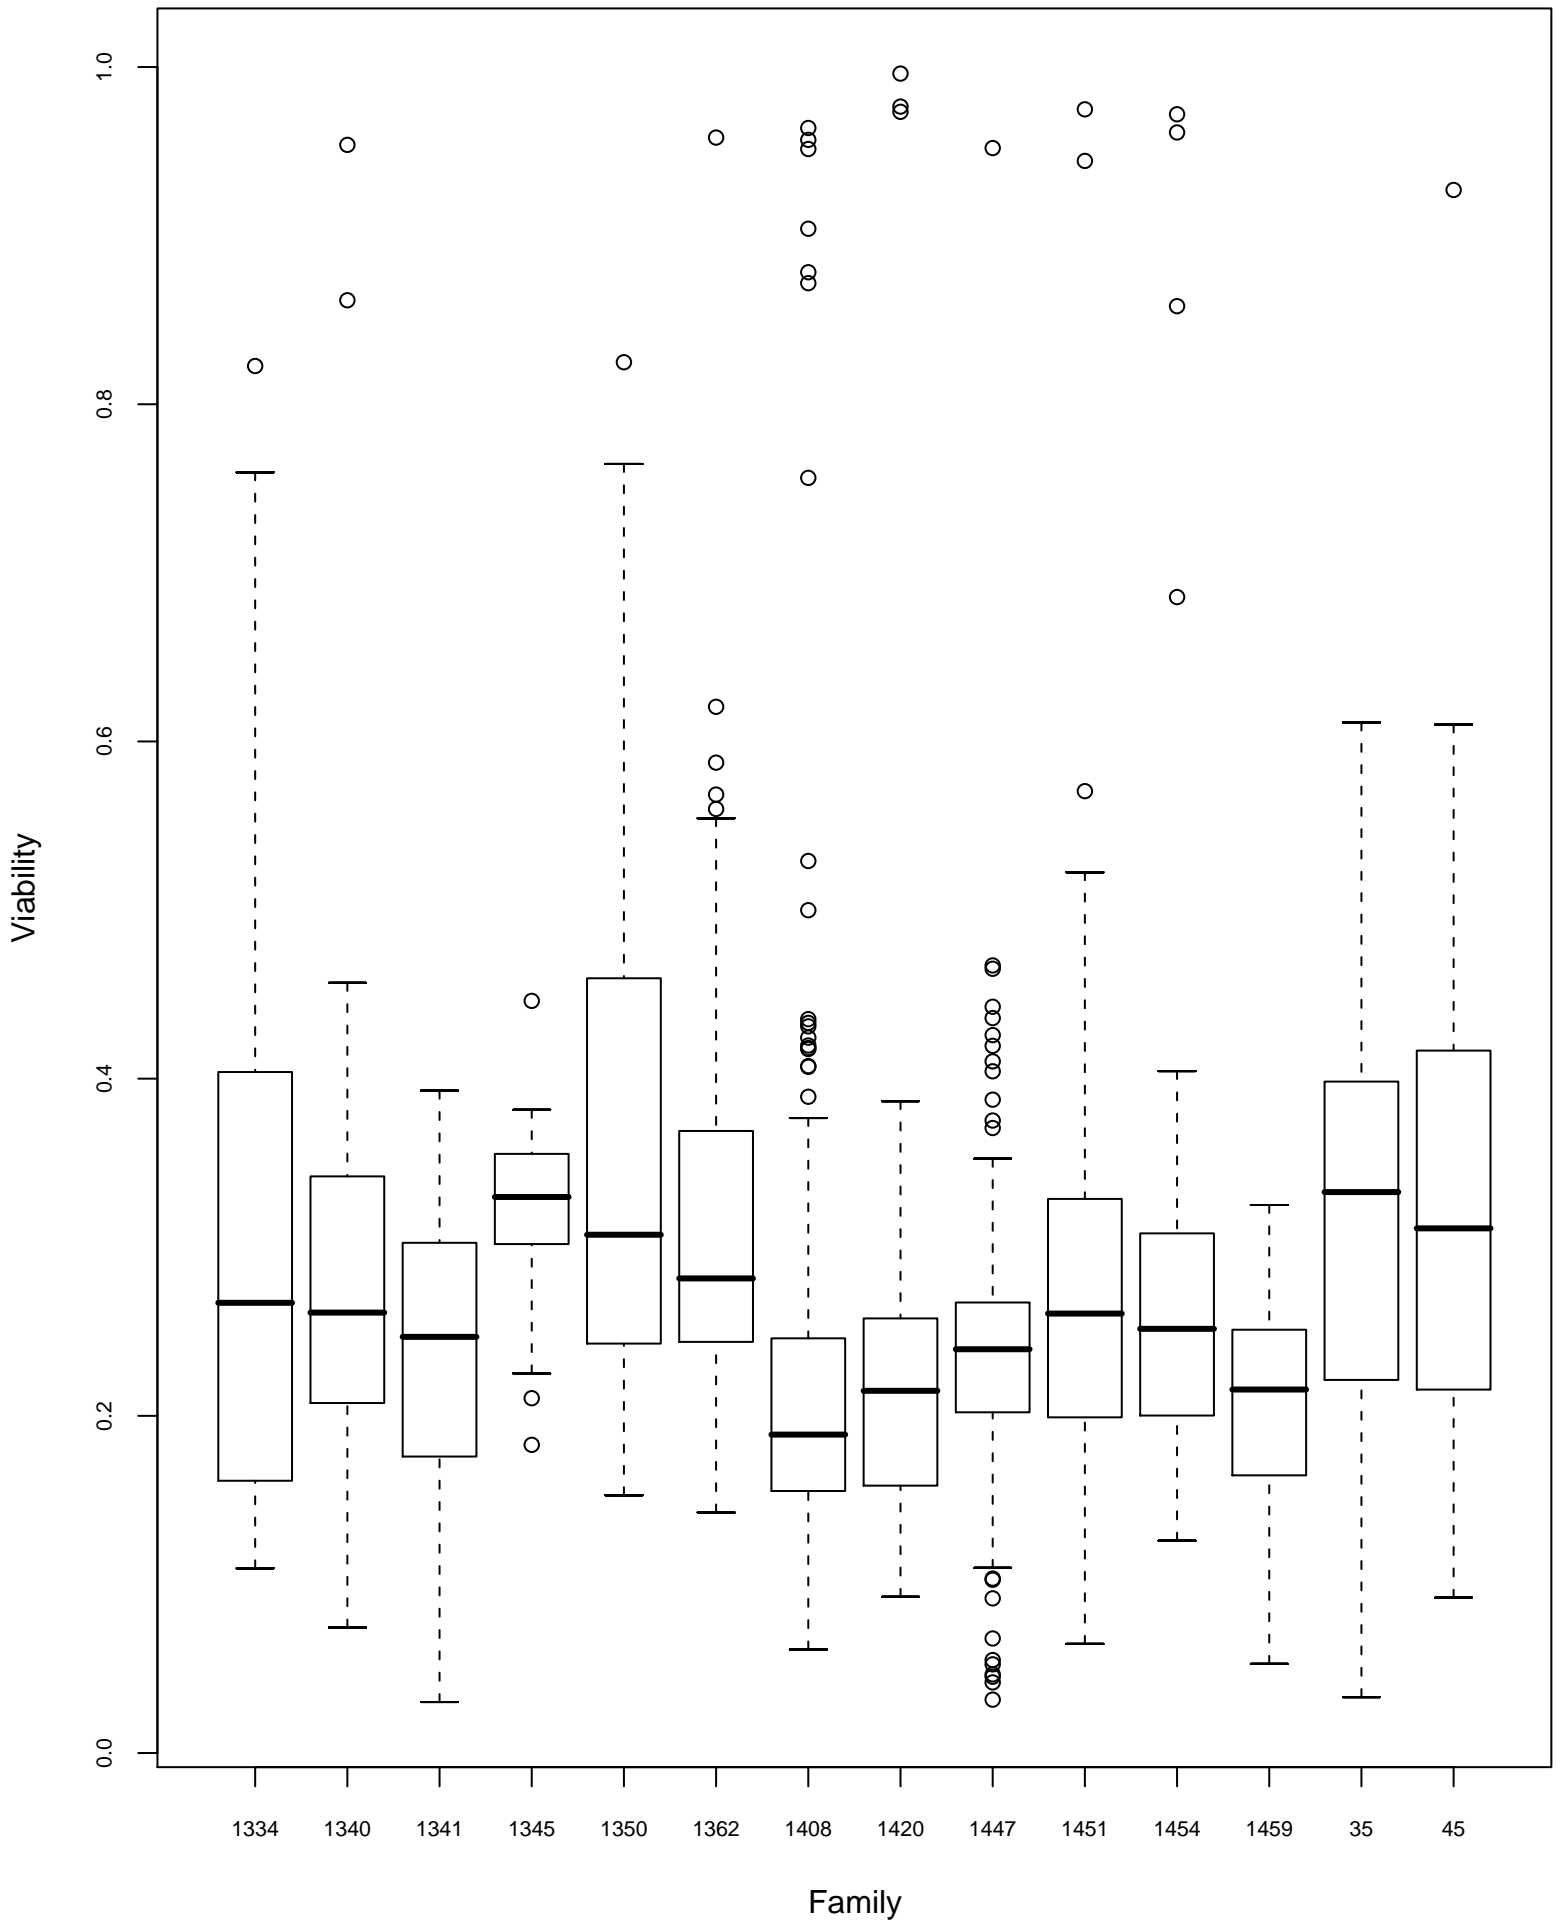



# Drug TPT, dose 2.5e-05 (mM)

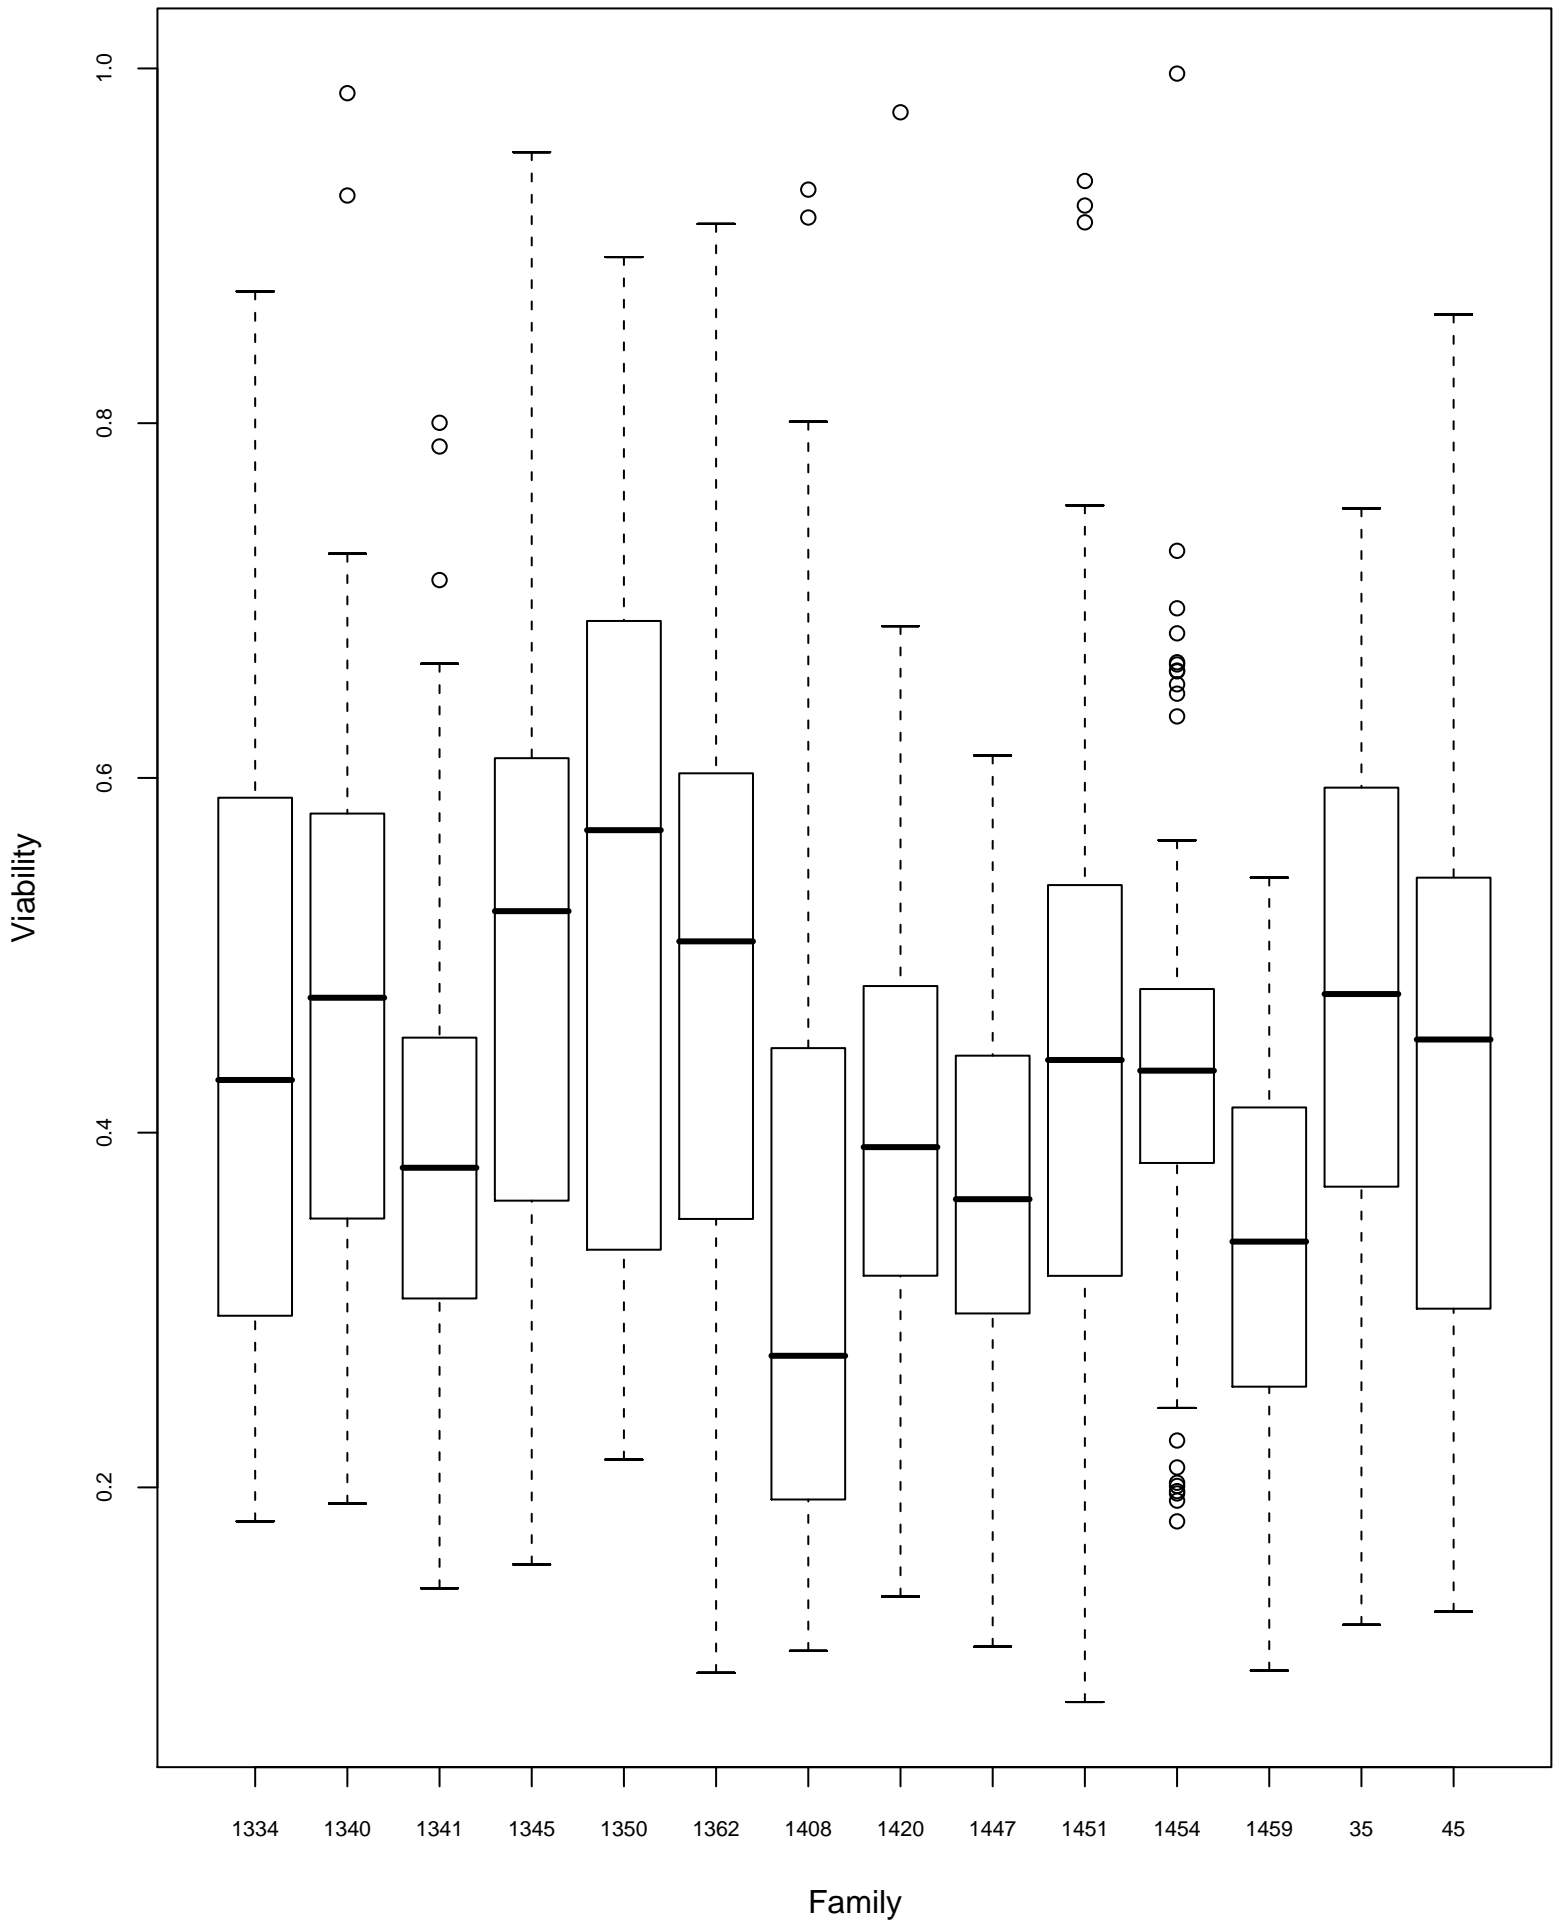

# Drug TPT, dose 1.5e-05 (mM)

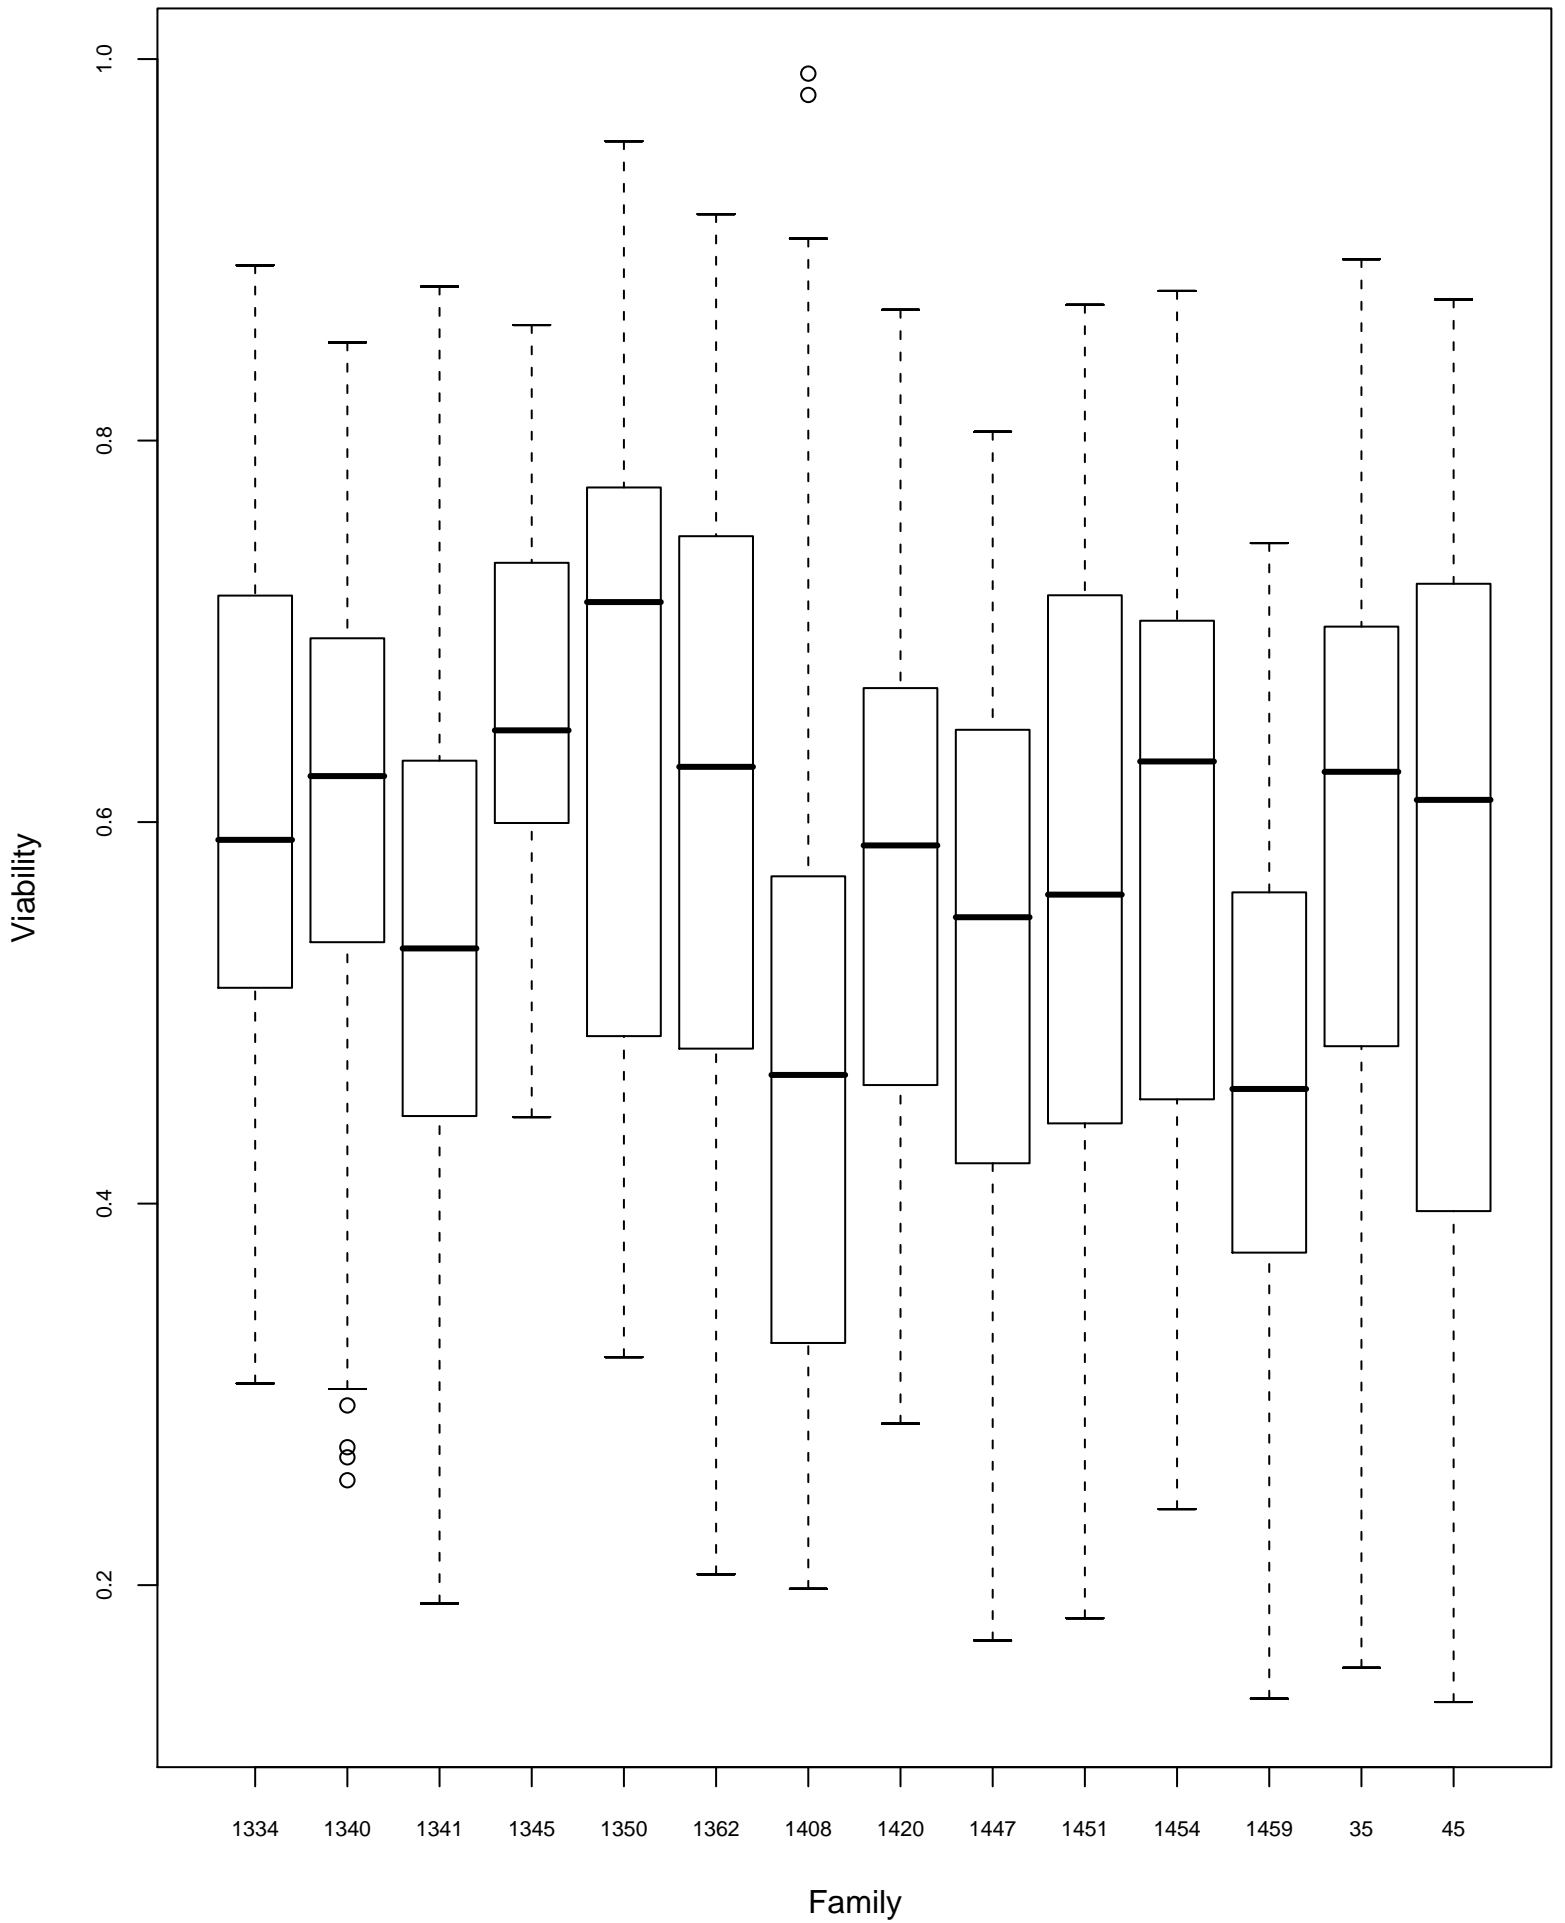

# Drug TPT, dose 8e-06 (mM)

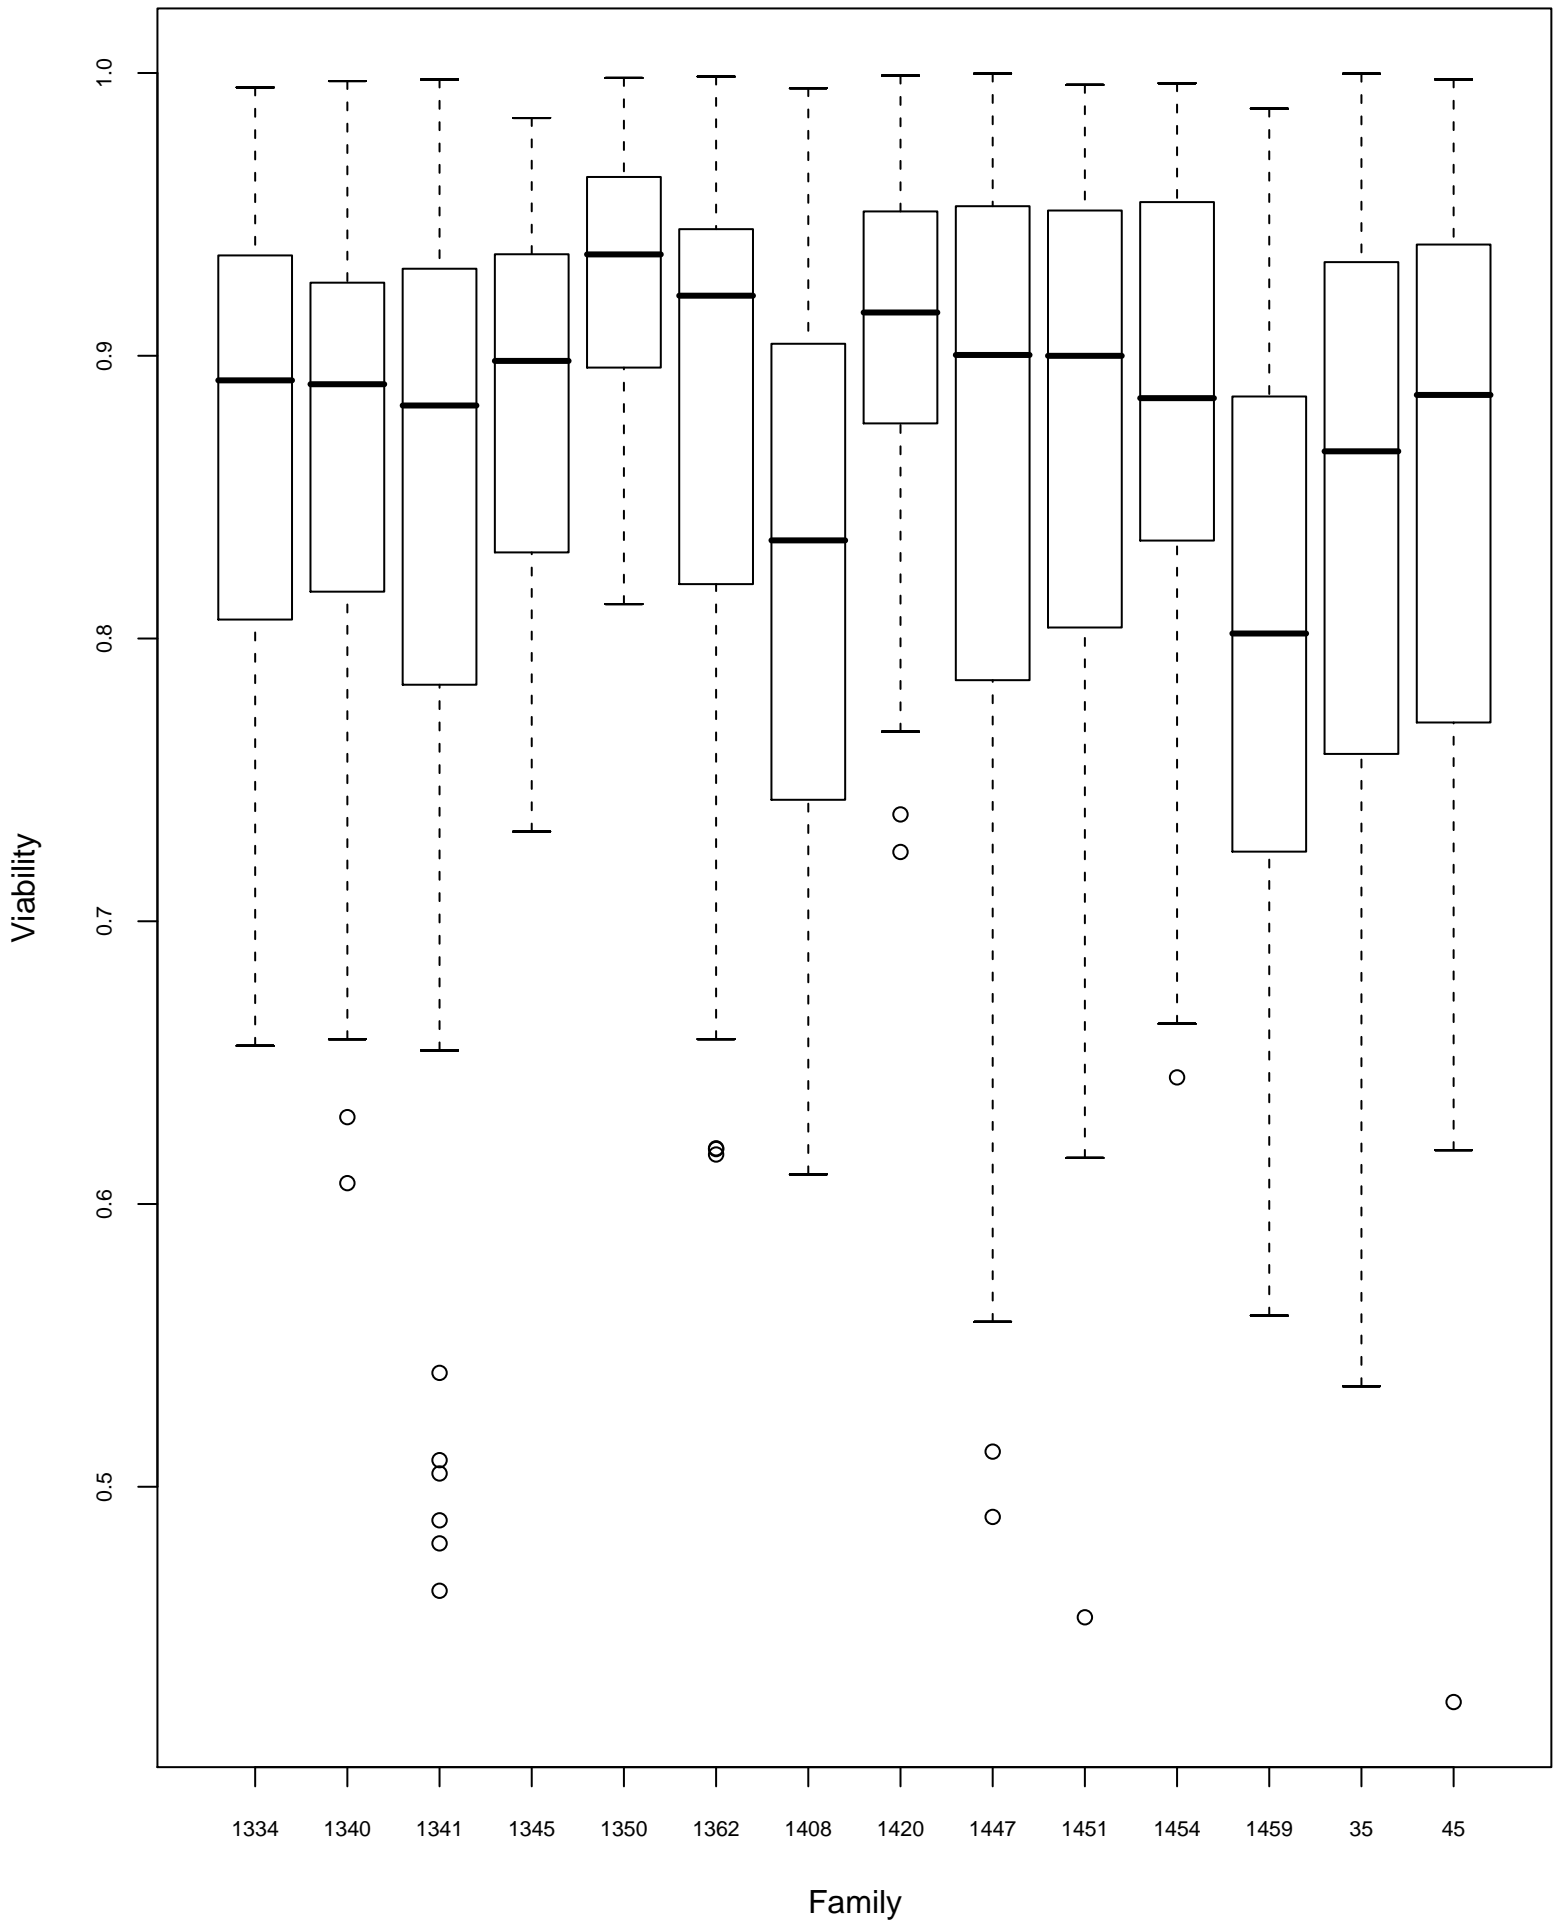

# Drug TPT, dose 3.01e-06 (mM)

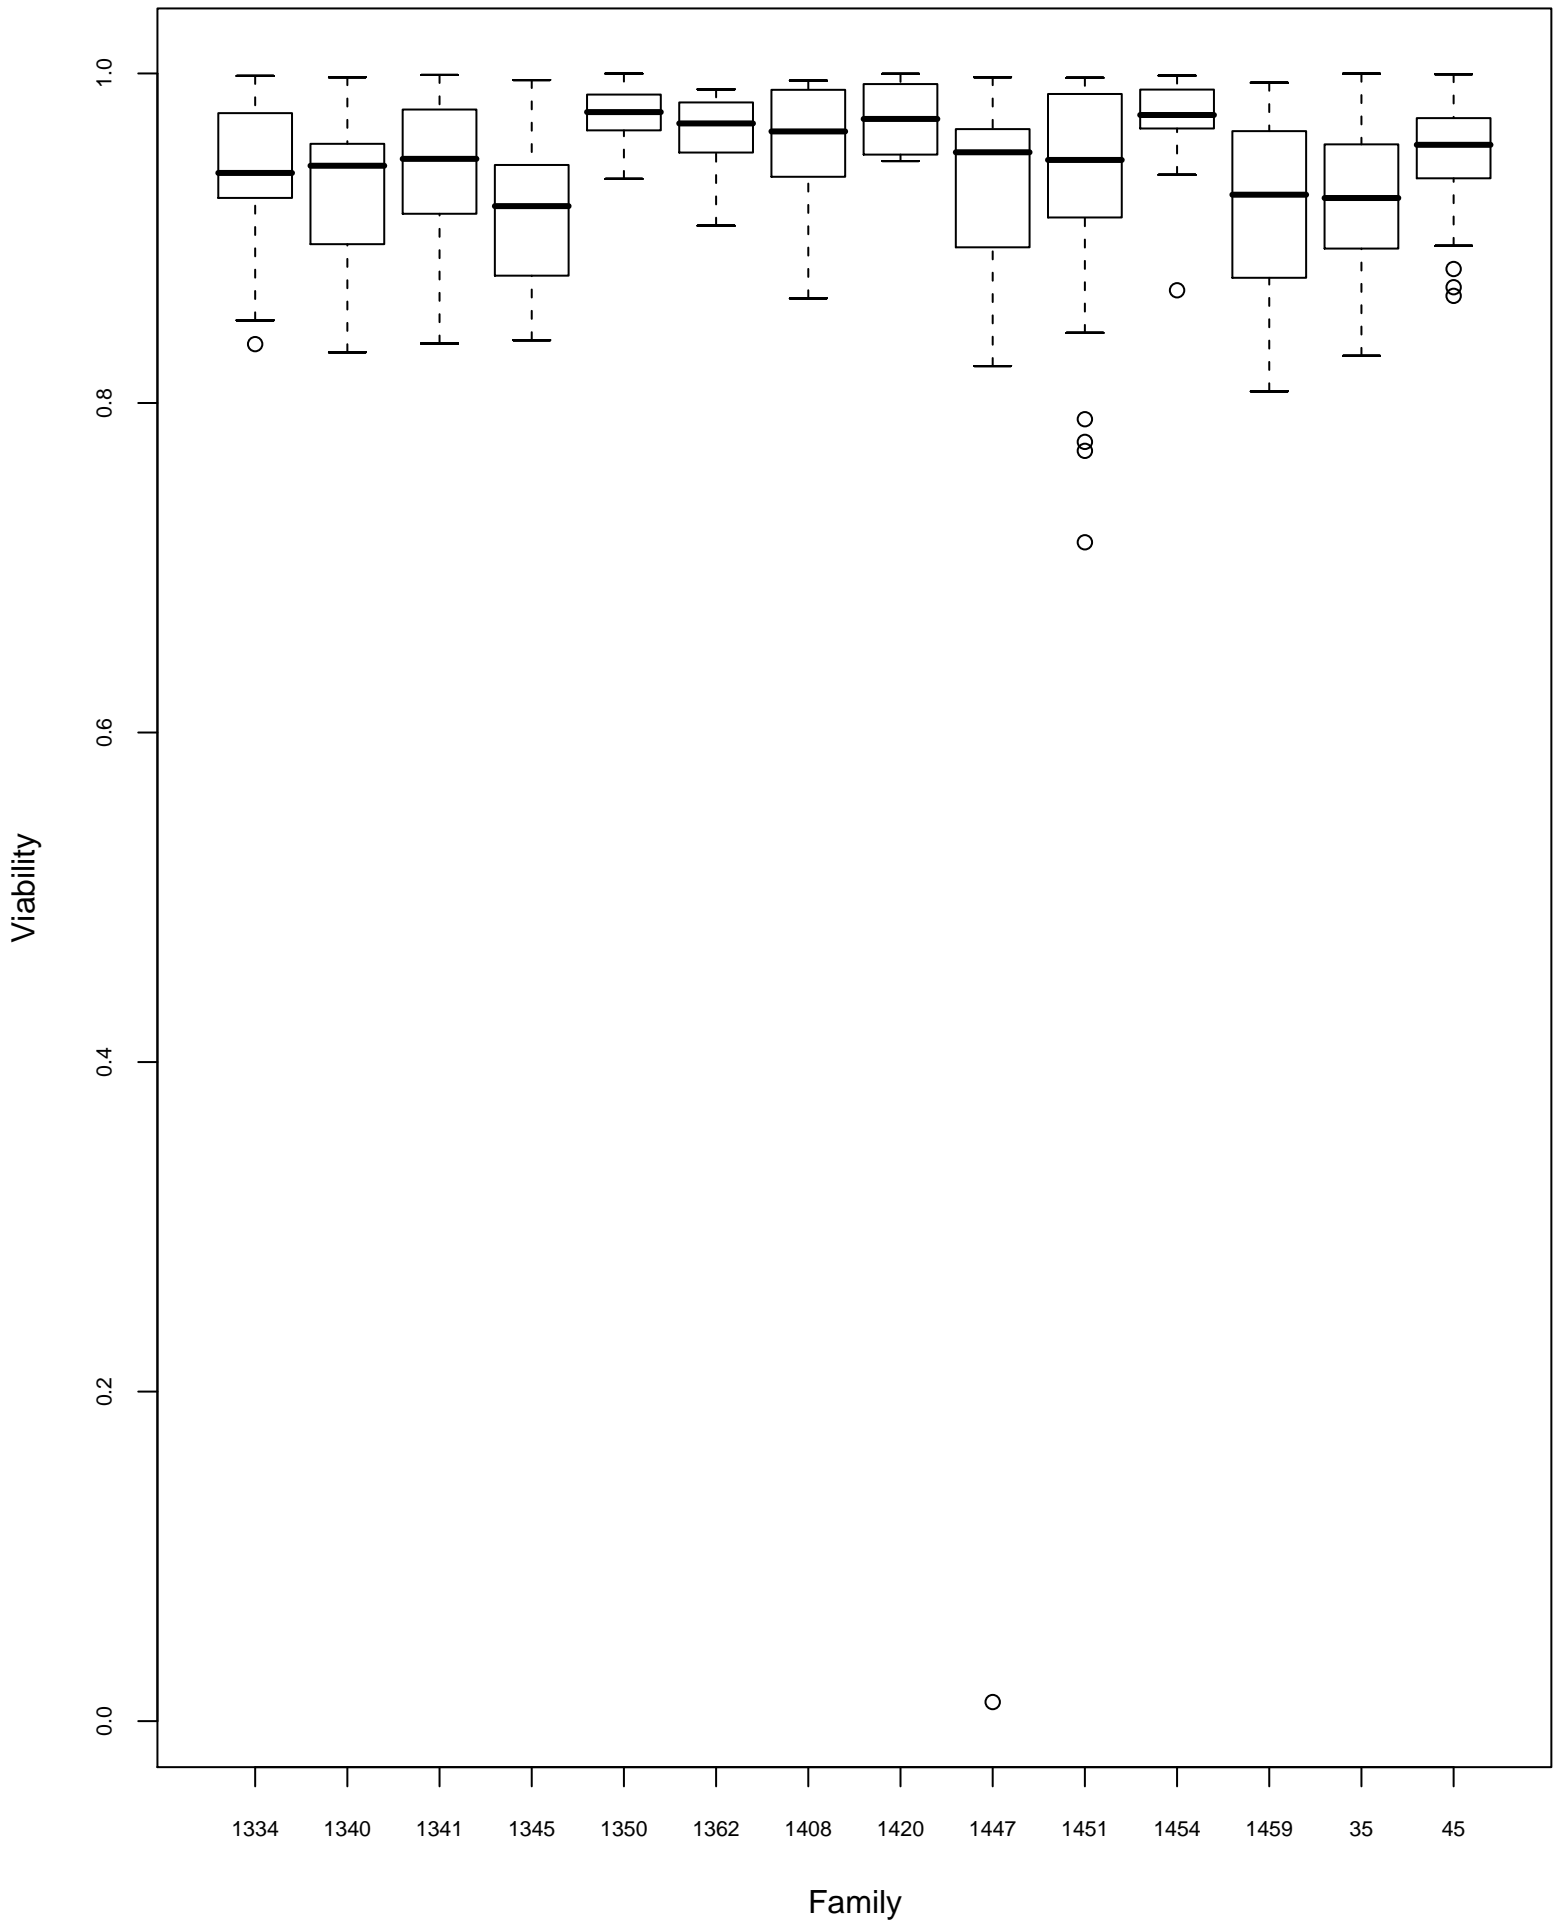

# Drug TPT, dose 1e-07 (mM)

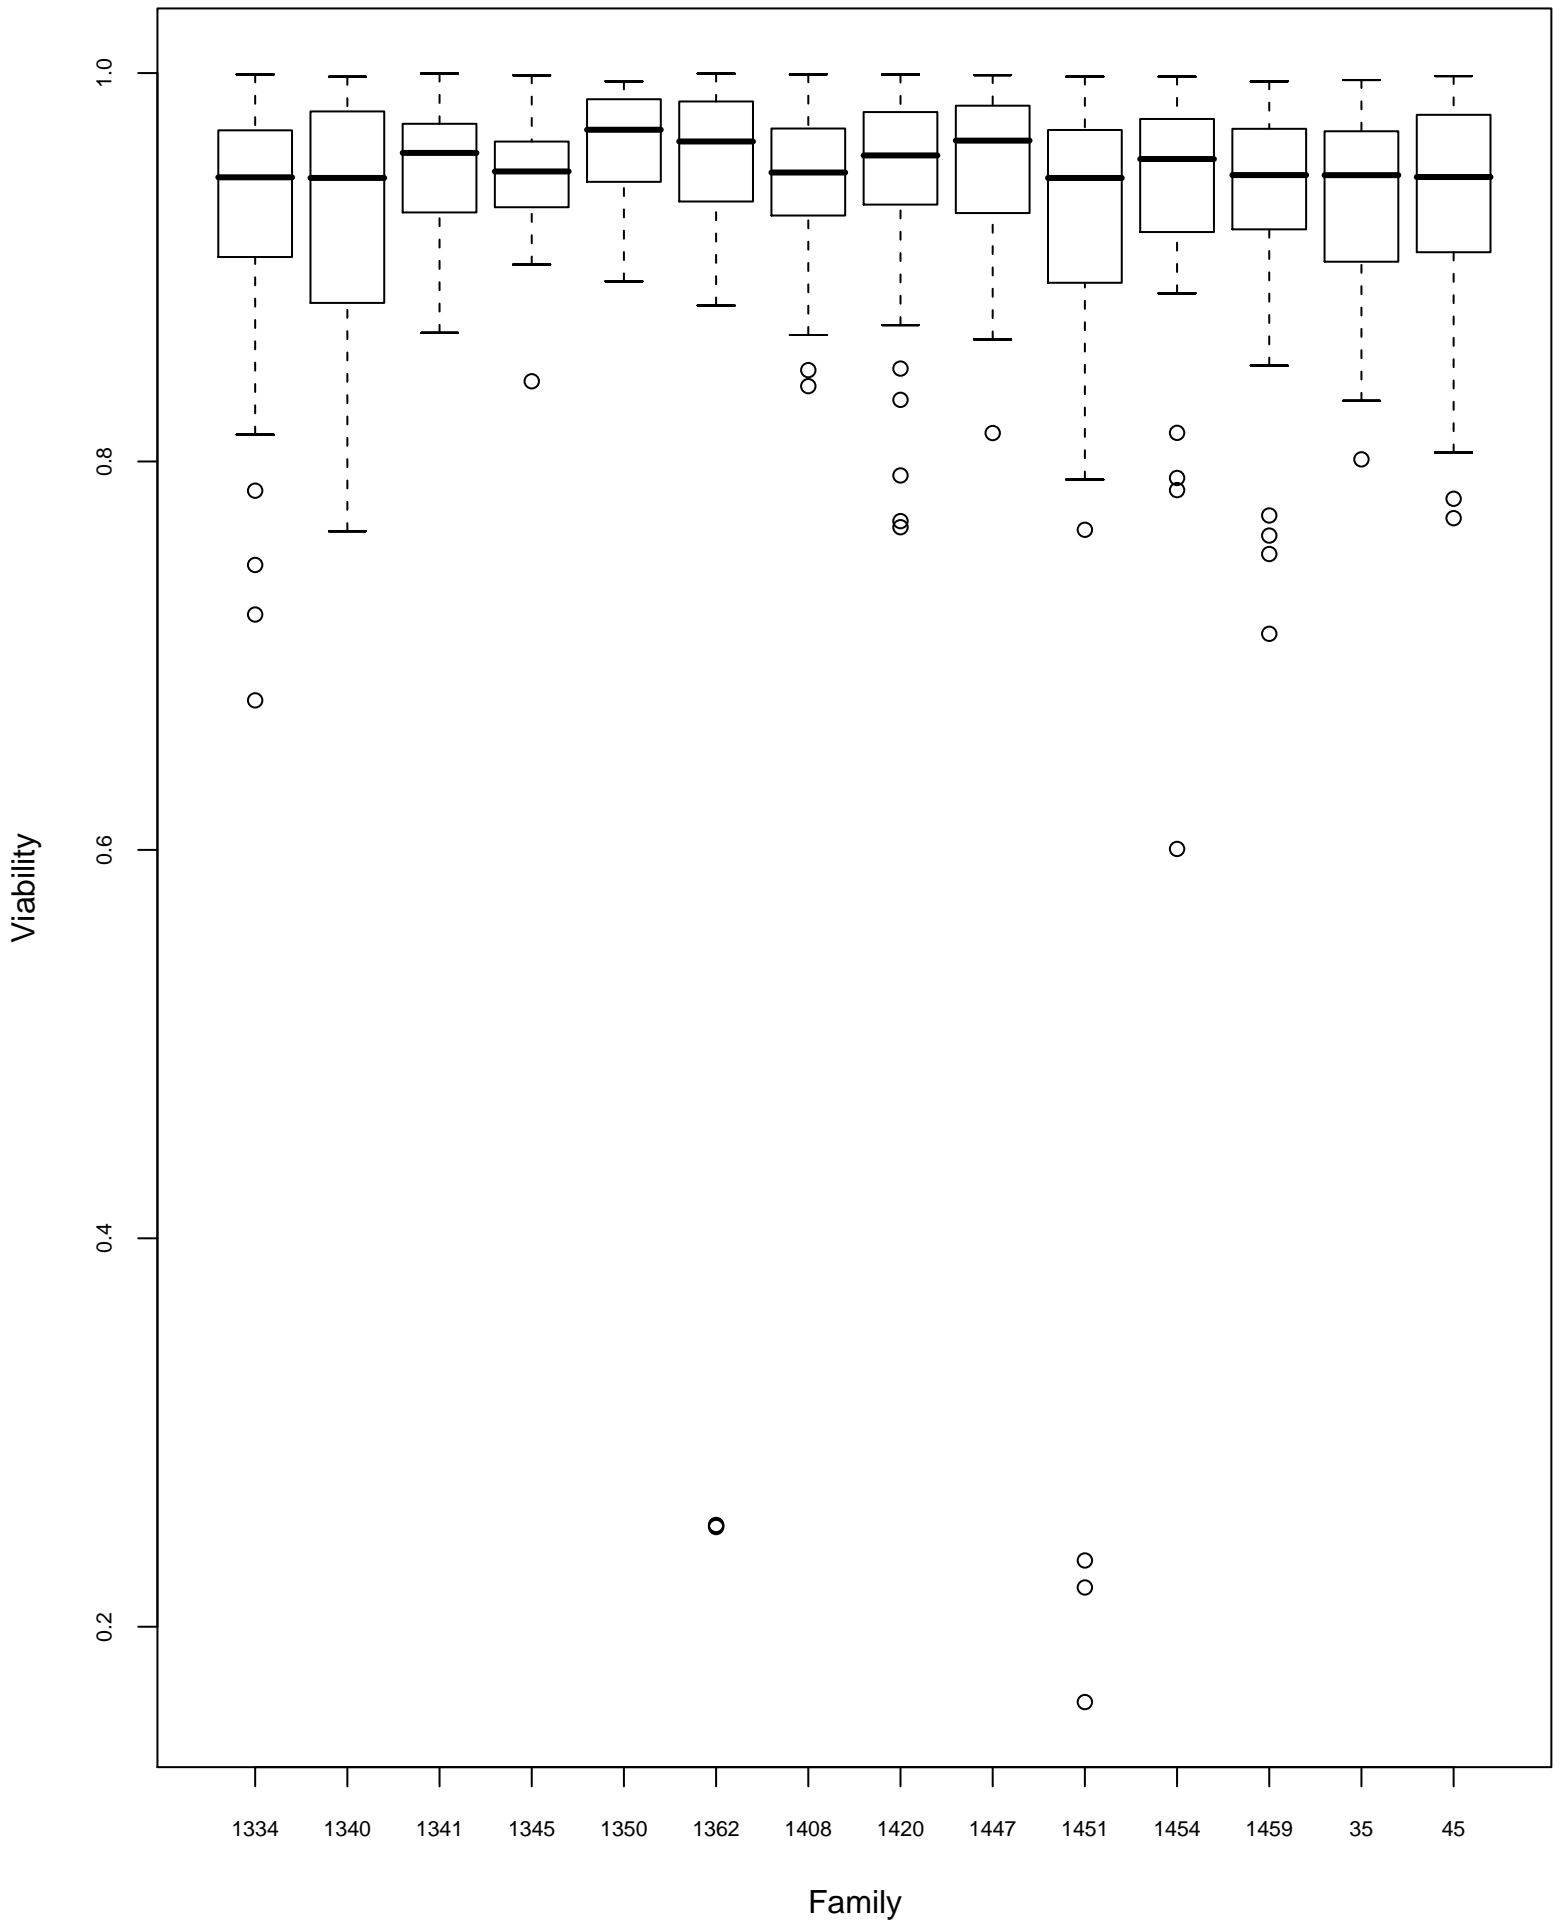

# Drug TPT, dose 1e-08 (mM)

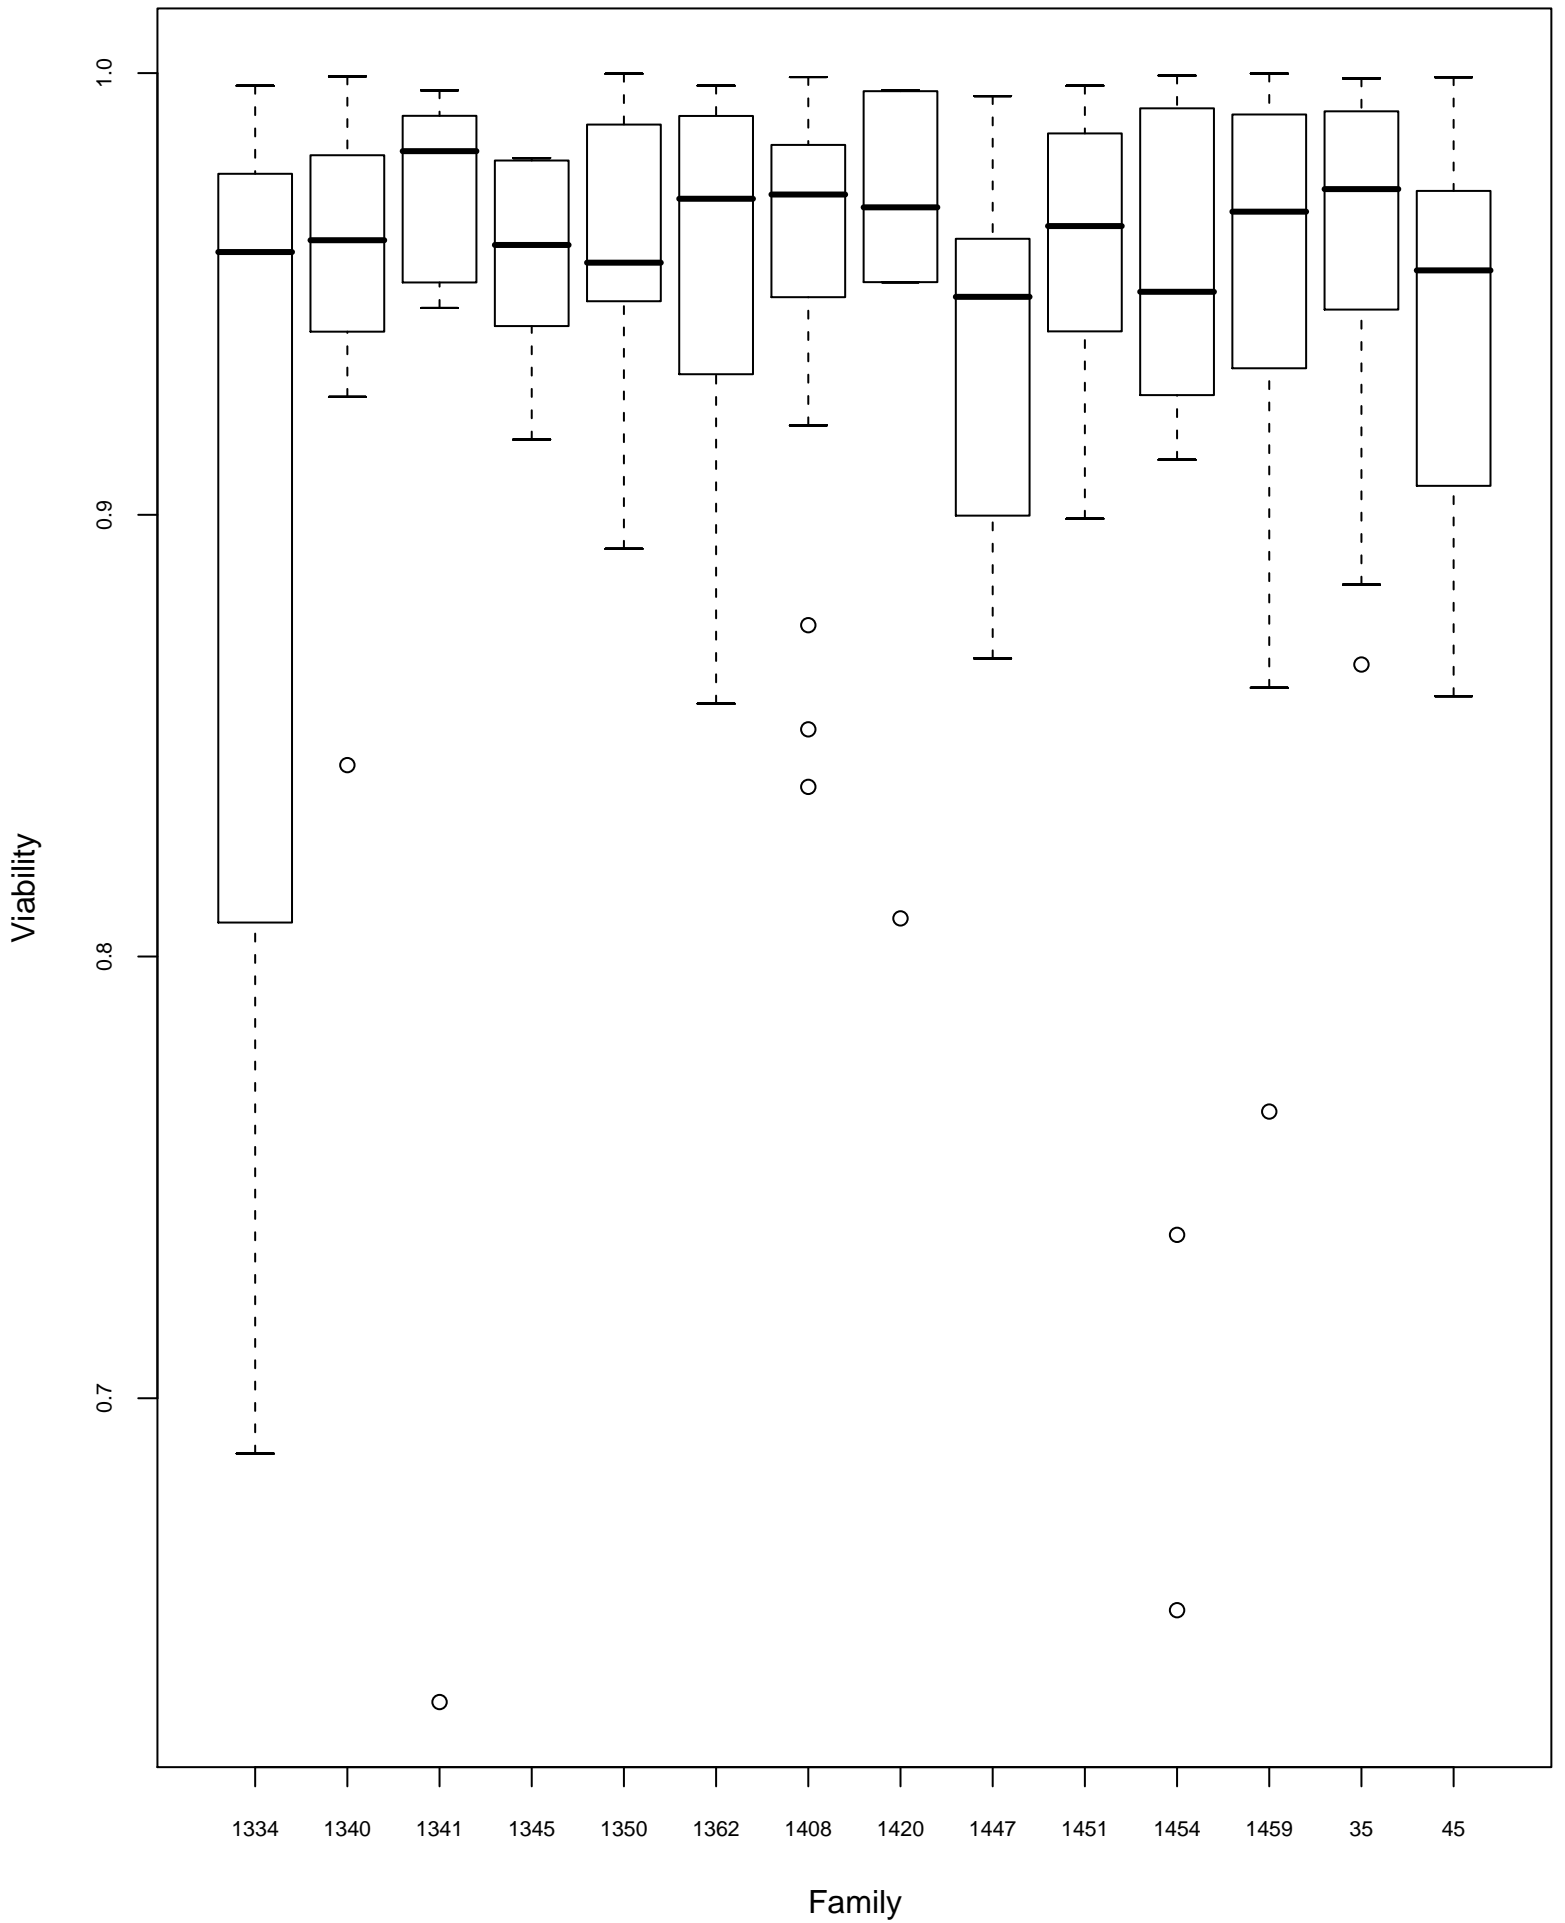

# Drug CICPT, dose 10 (mM)

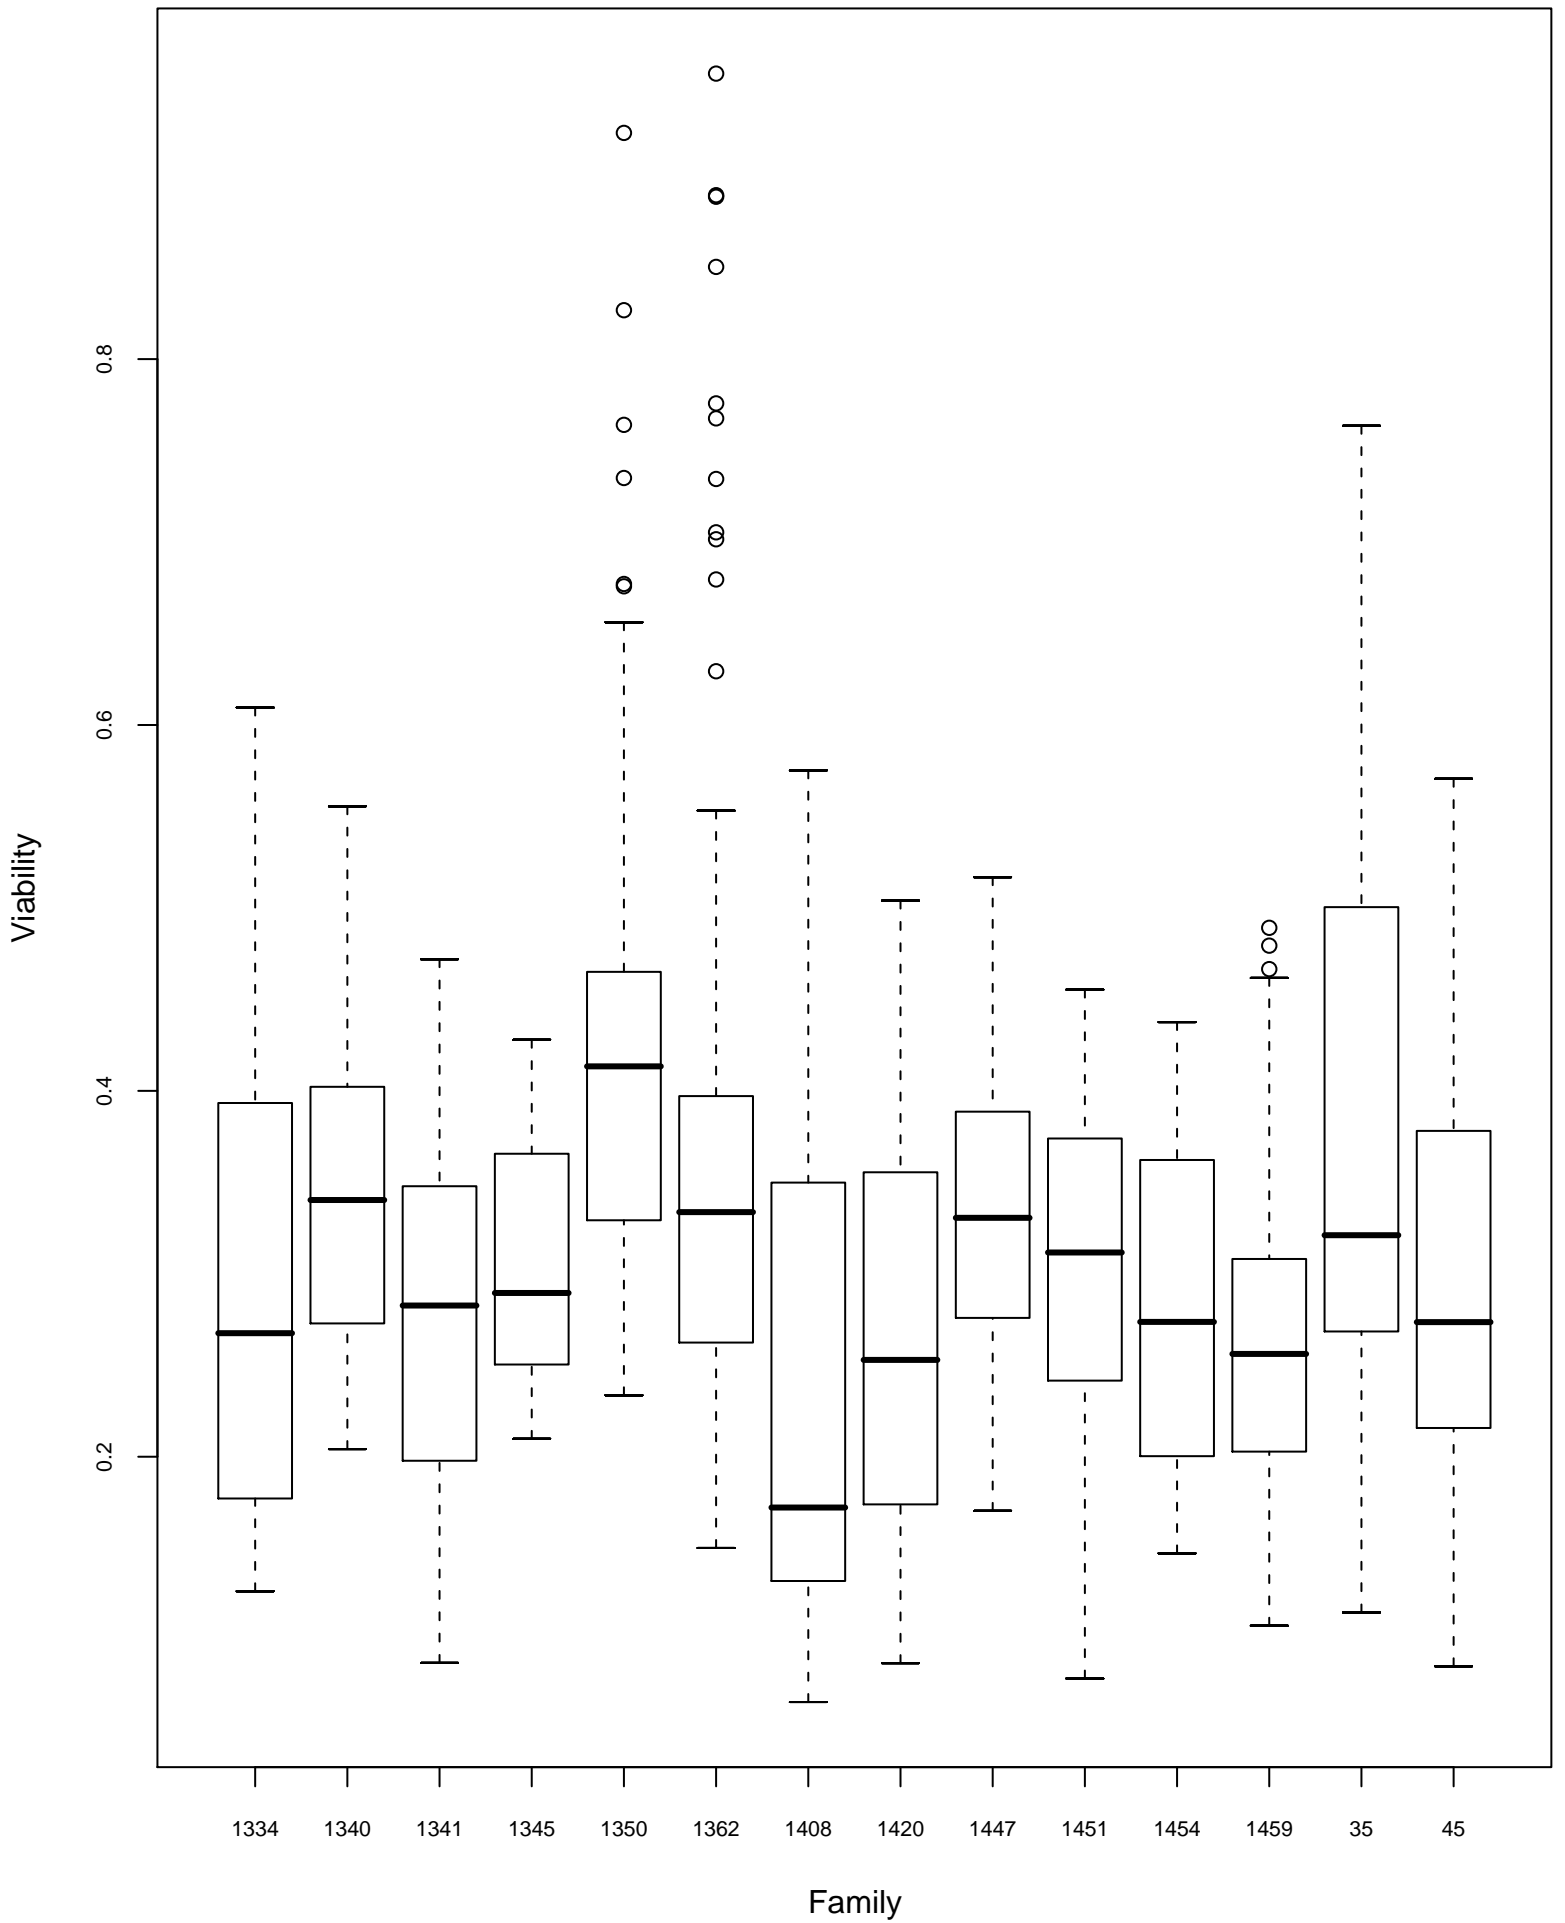

# Drug CICPT, dose 8 (mM)

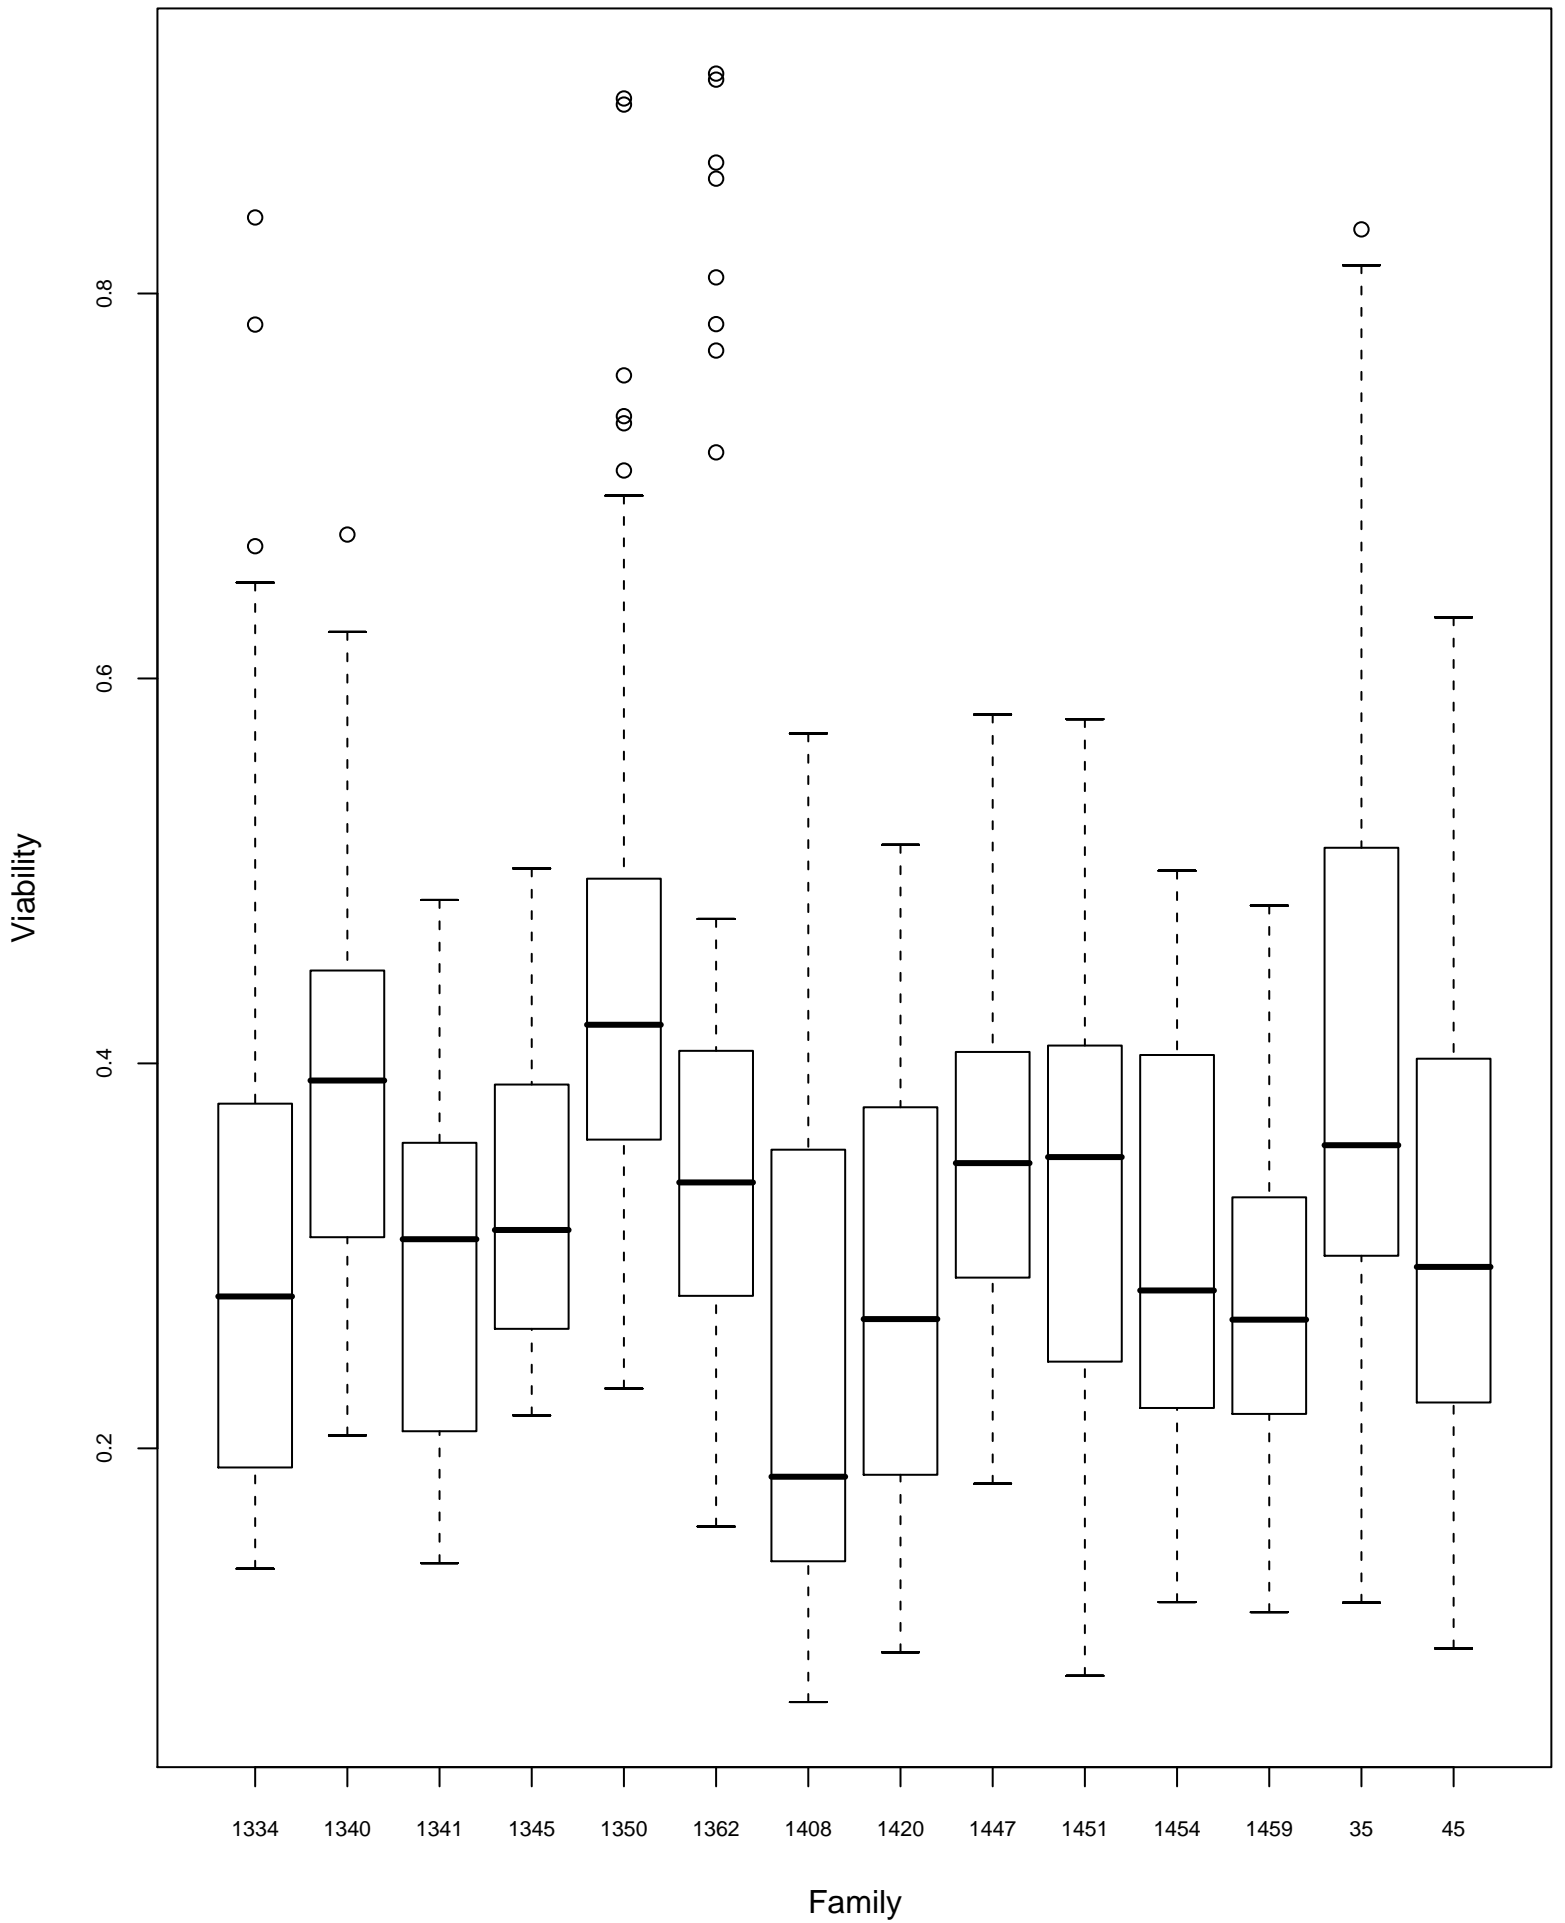



# Drug CICPT, dose 5 (mM)

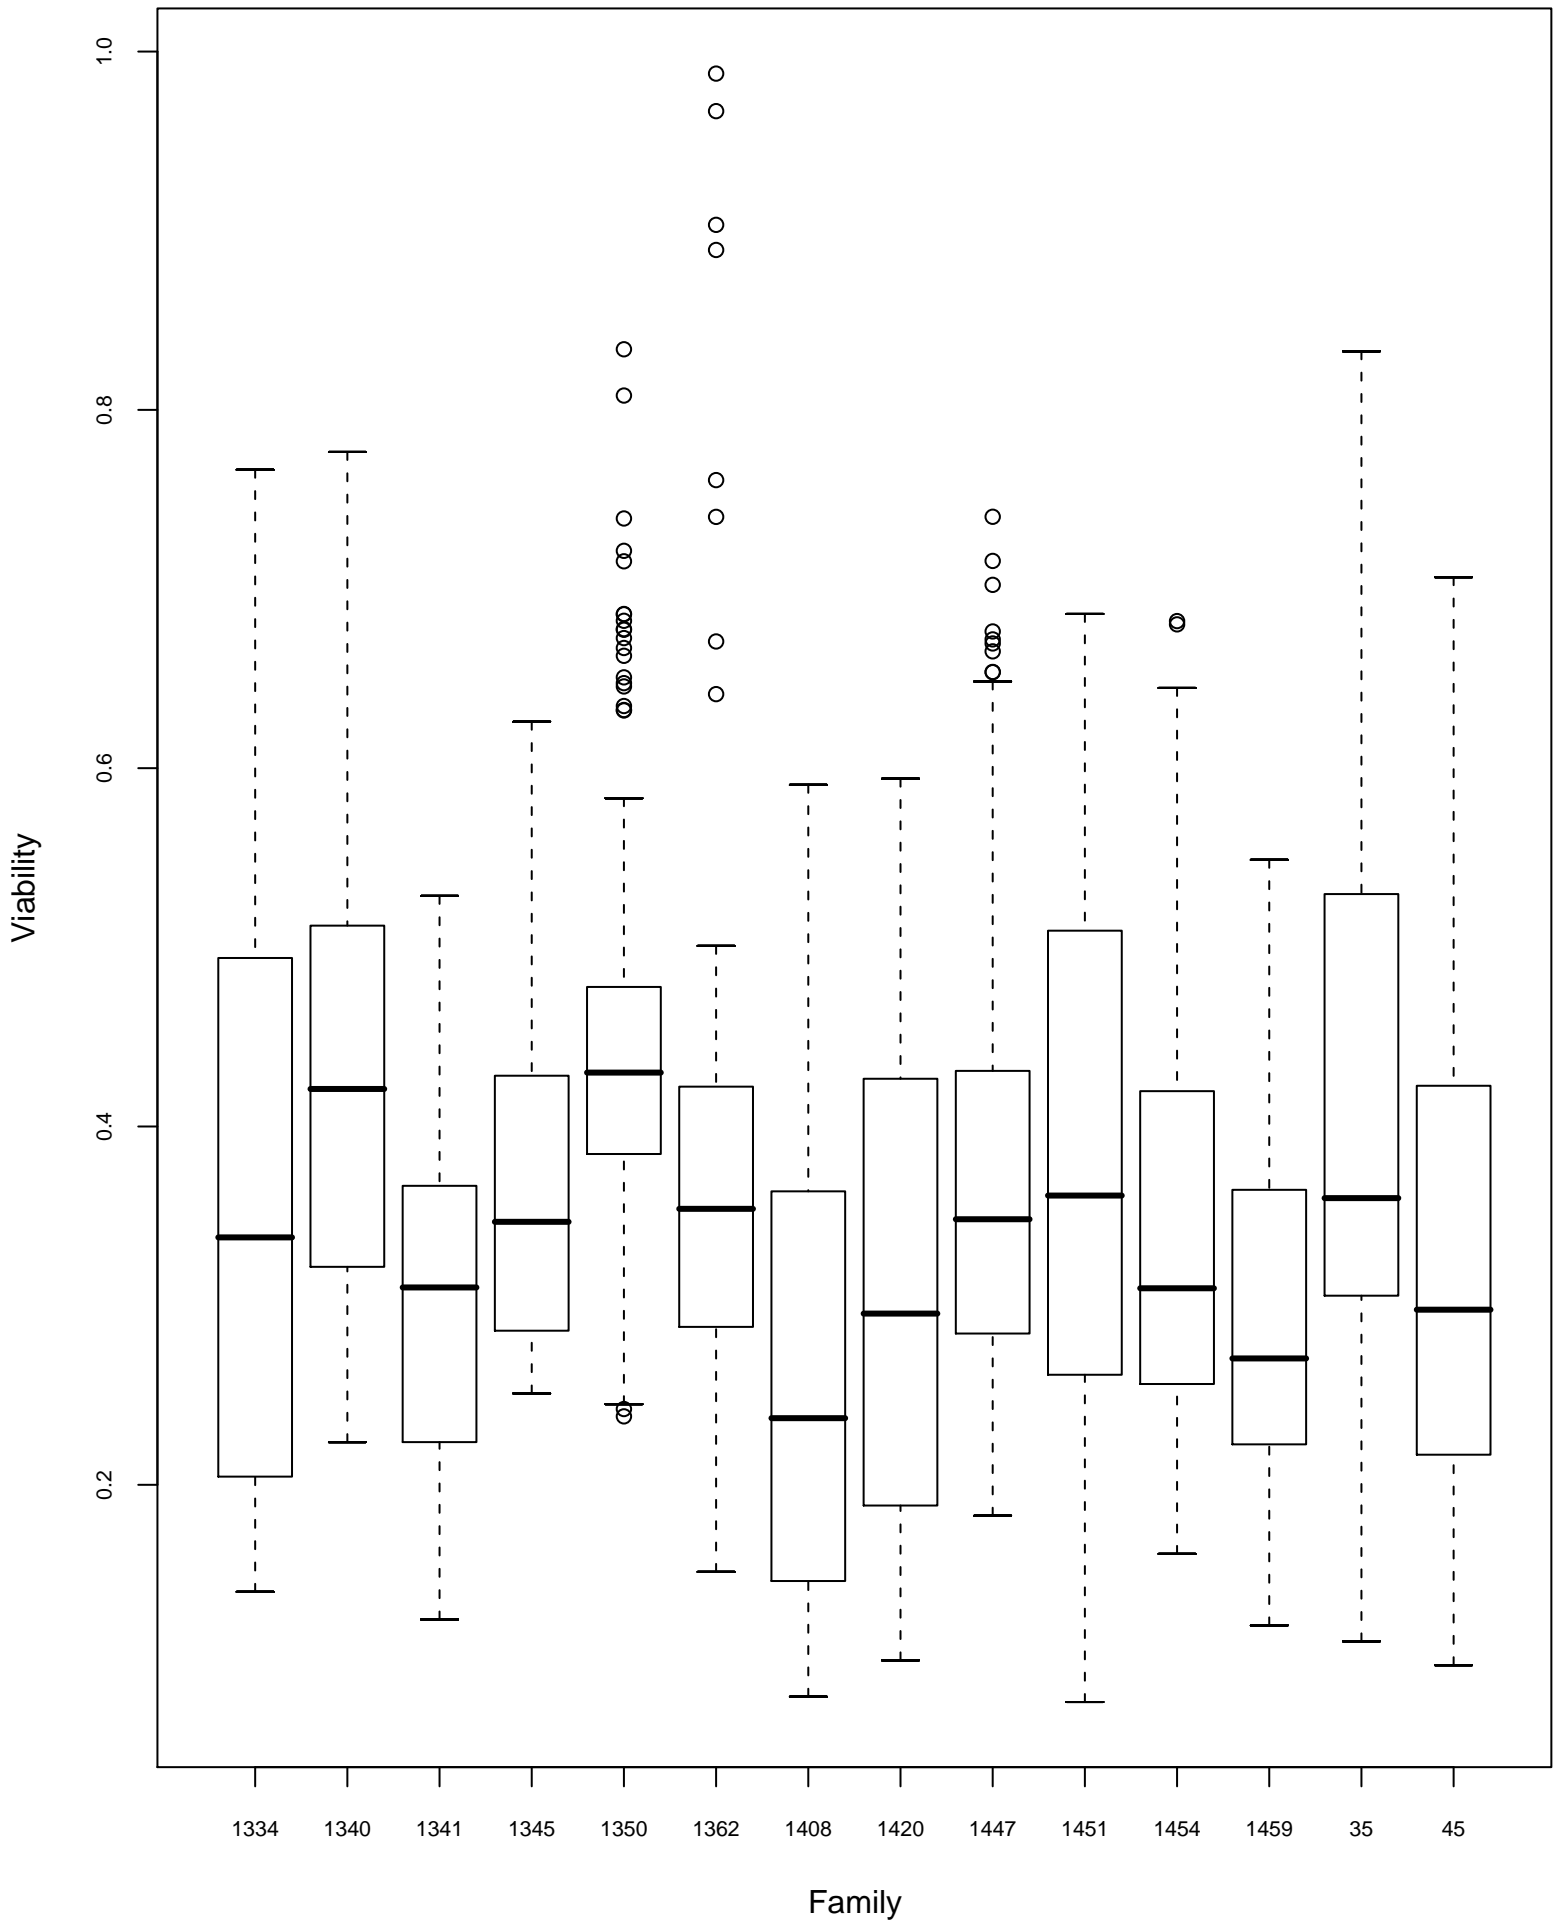

# Drug CICPT, dose 4 (mM)

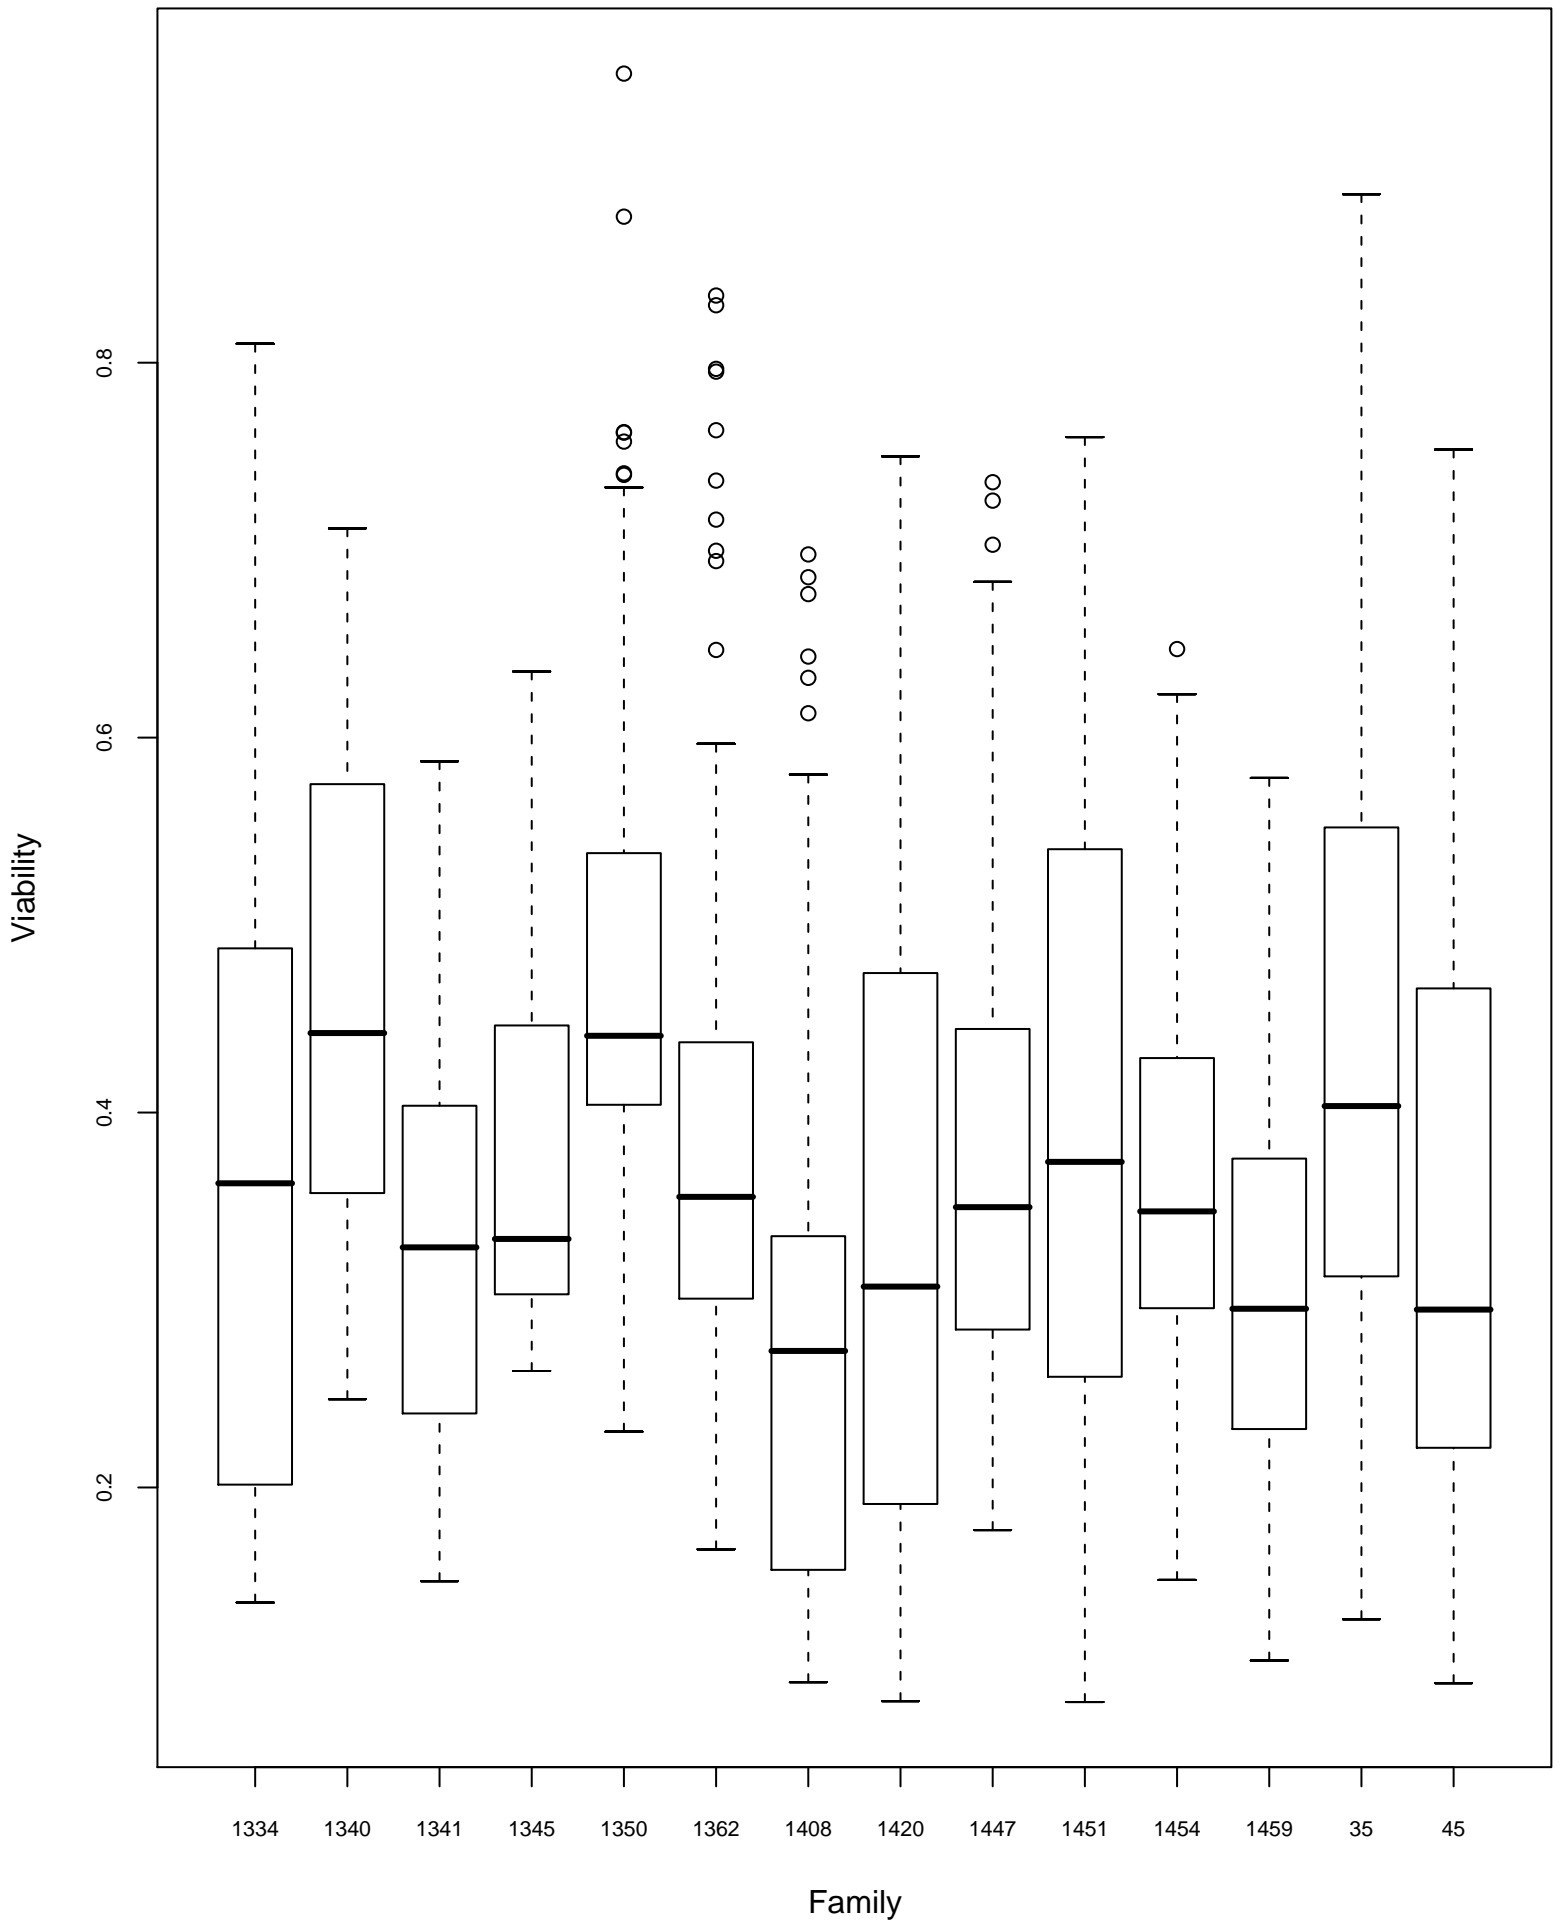

# Drug CICPT, dose 3 (mM)

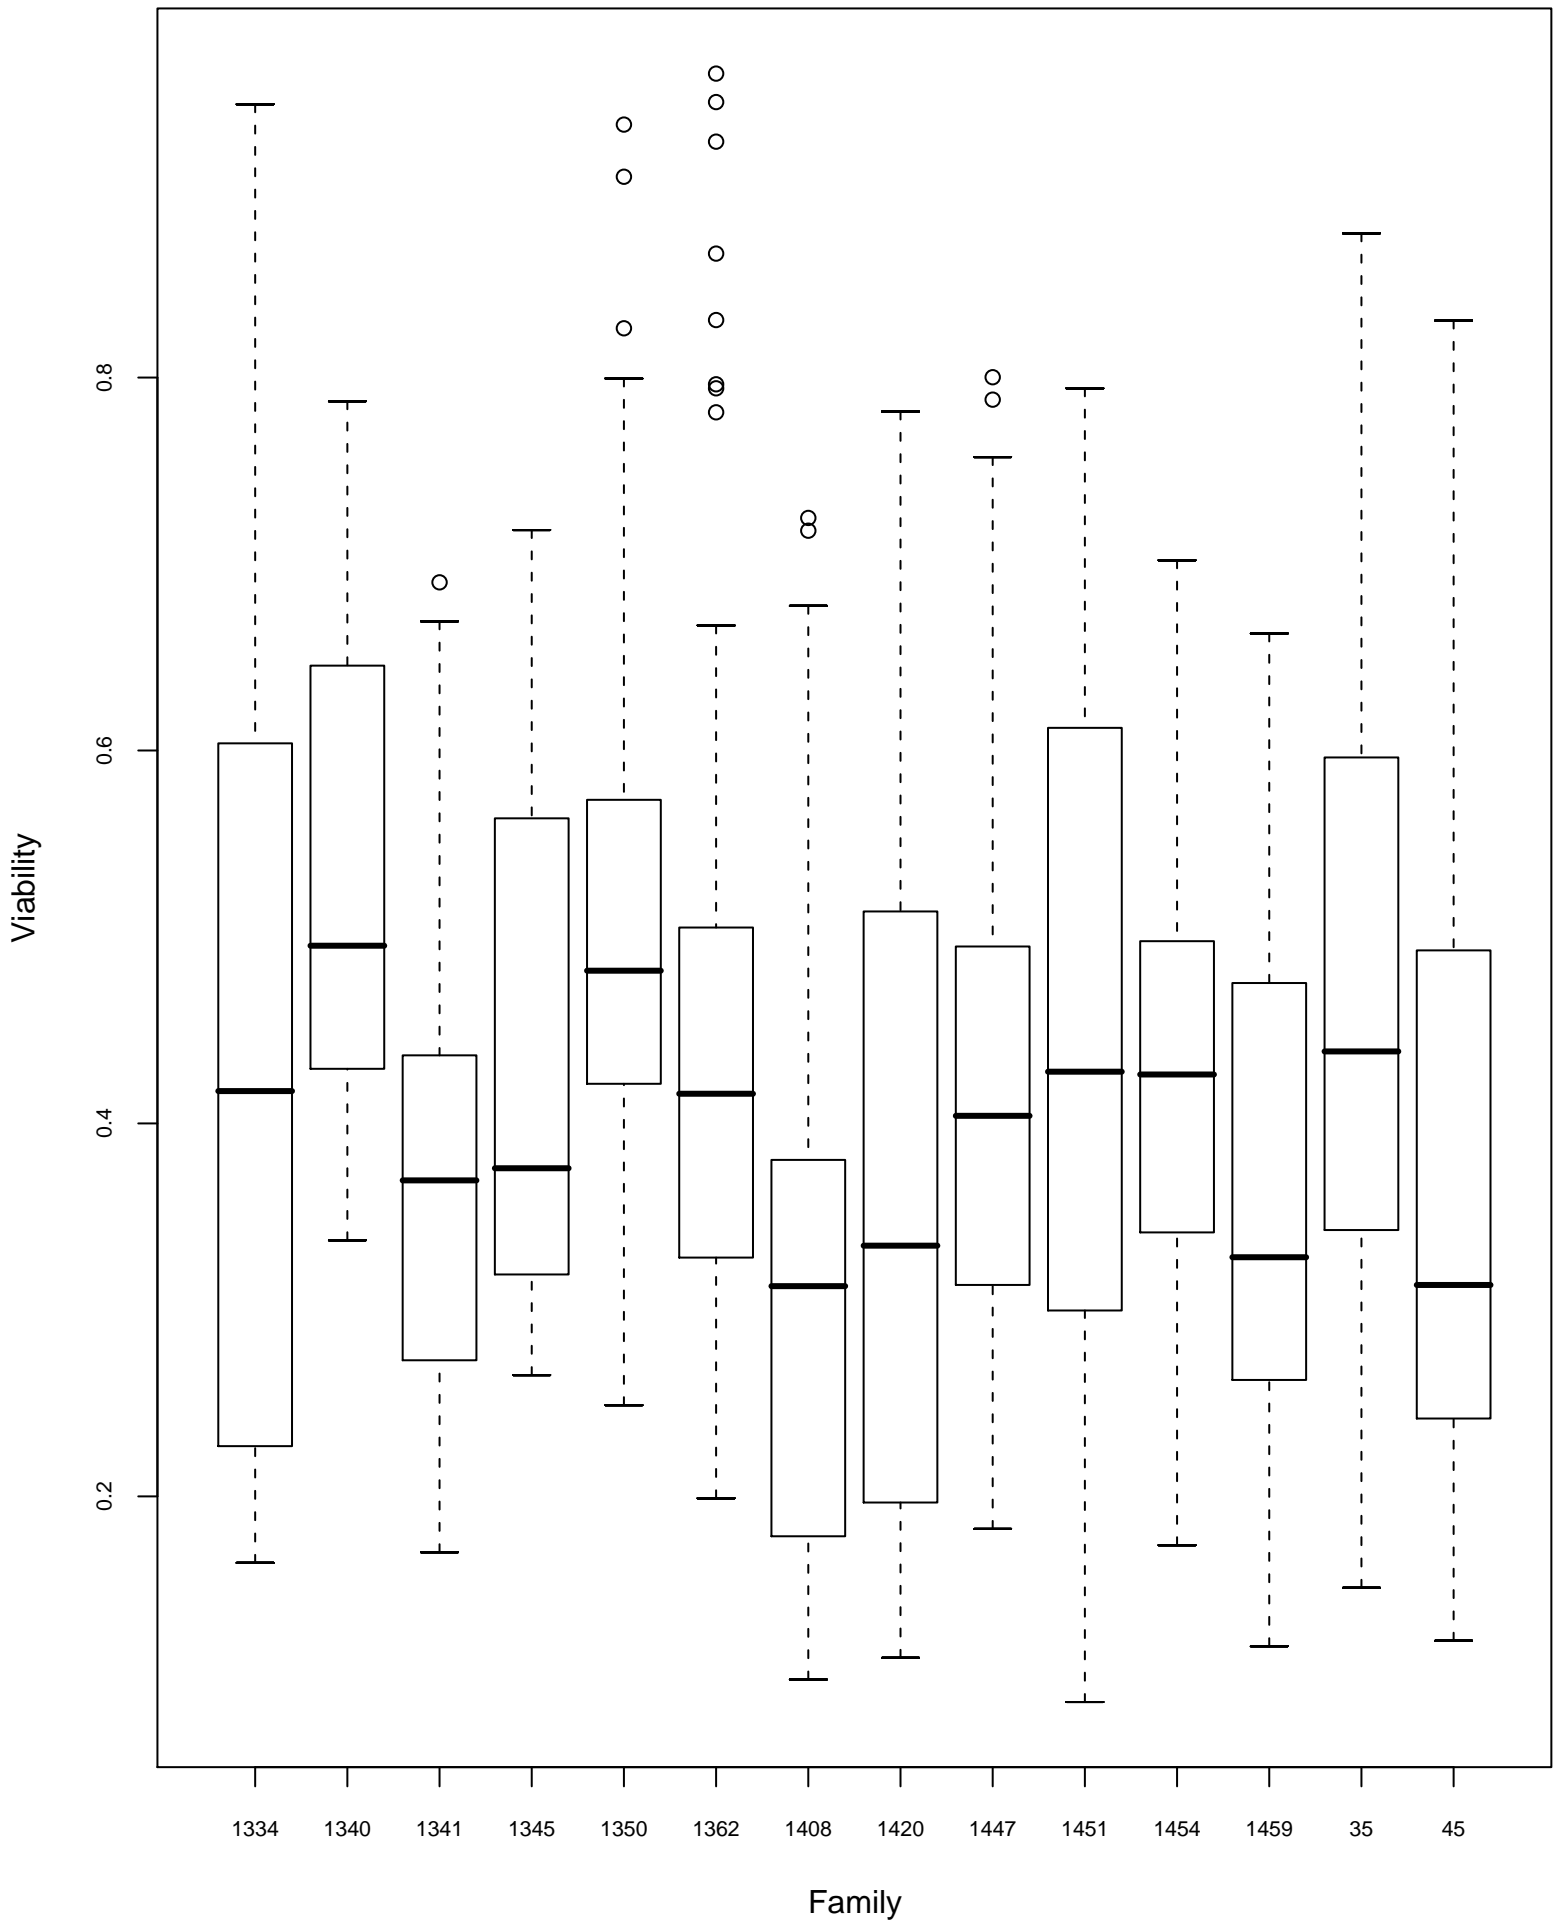

# Drug CICPT, dose 2 (mM)

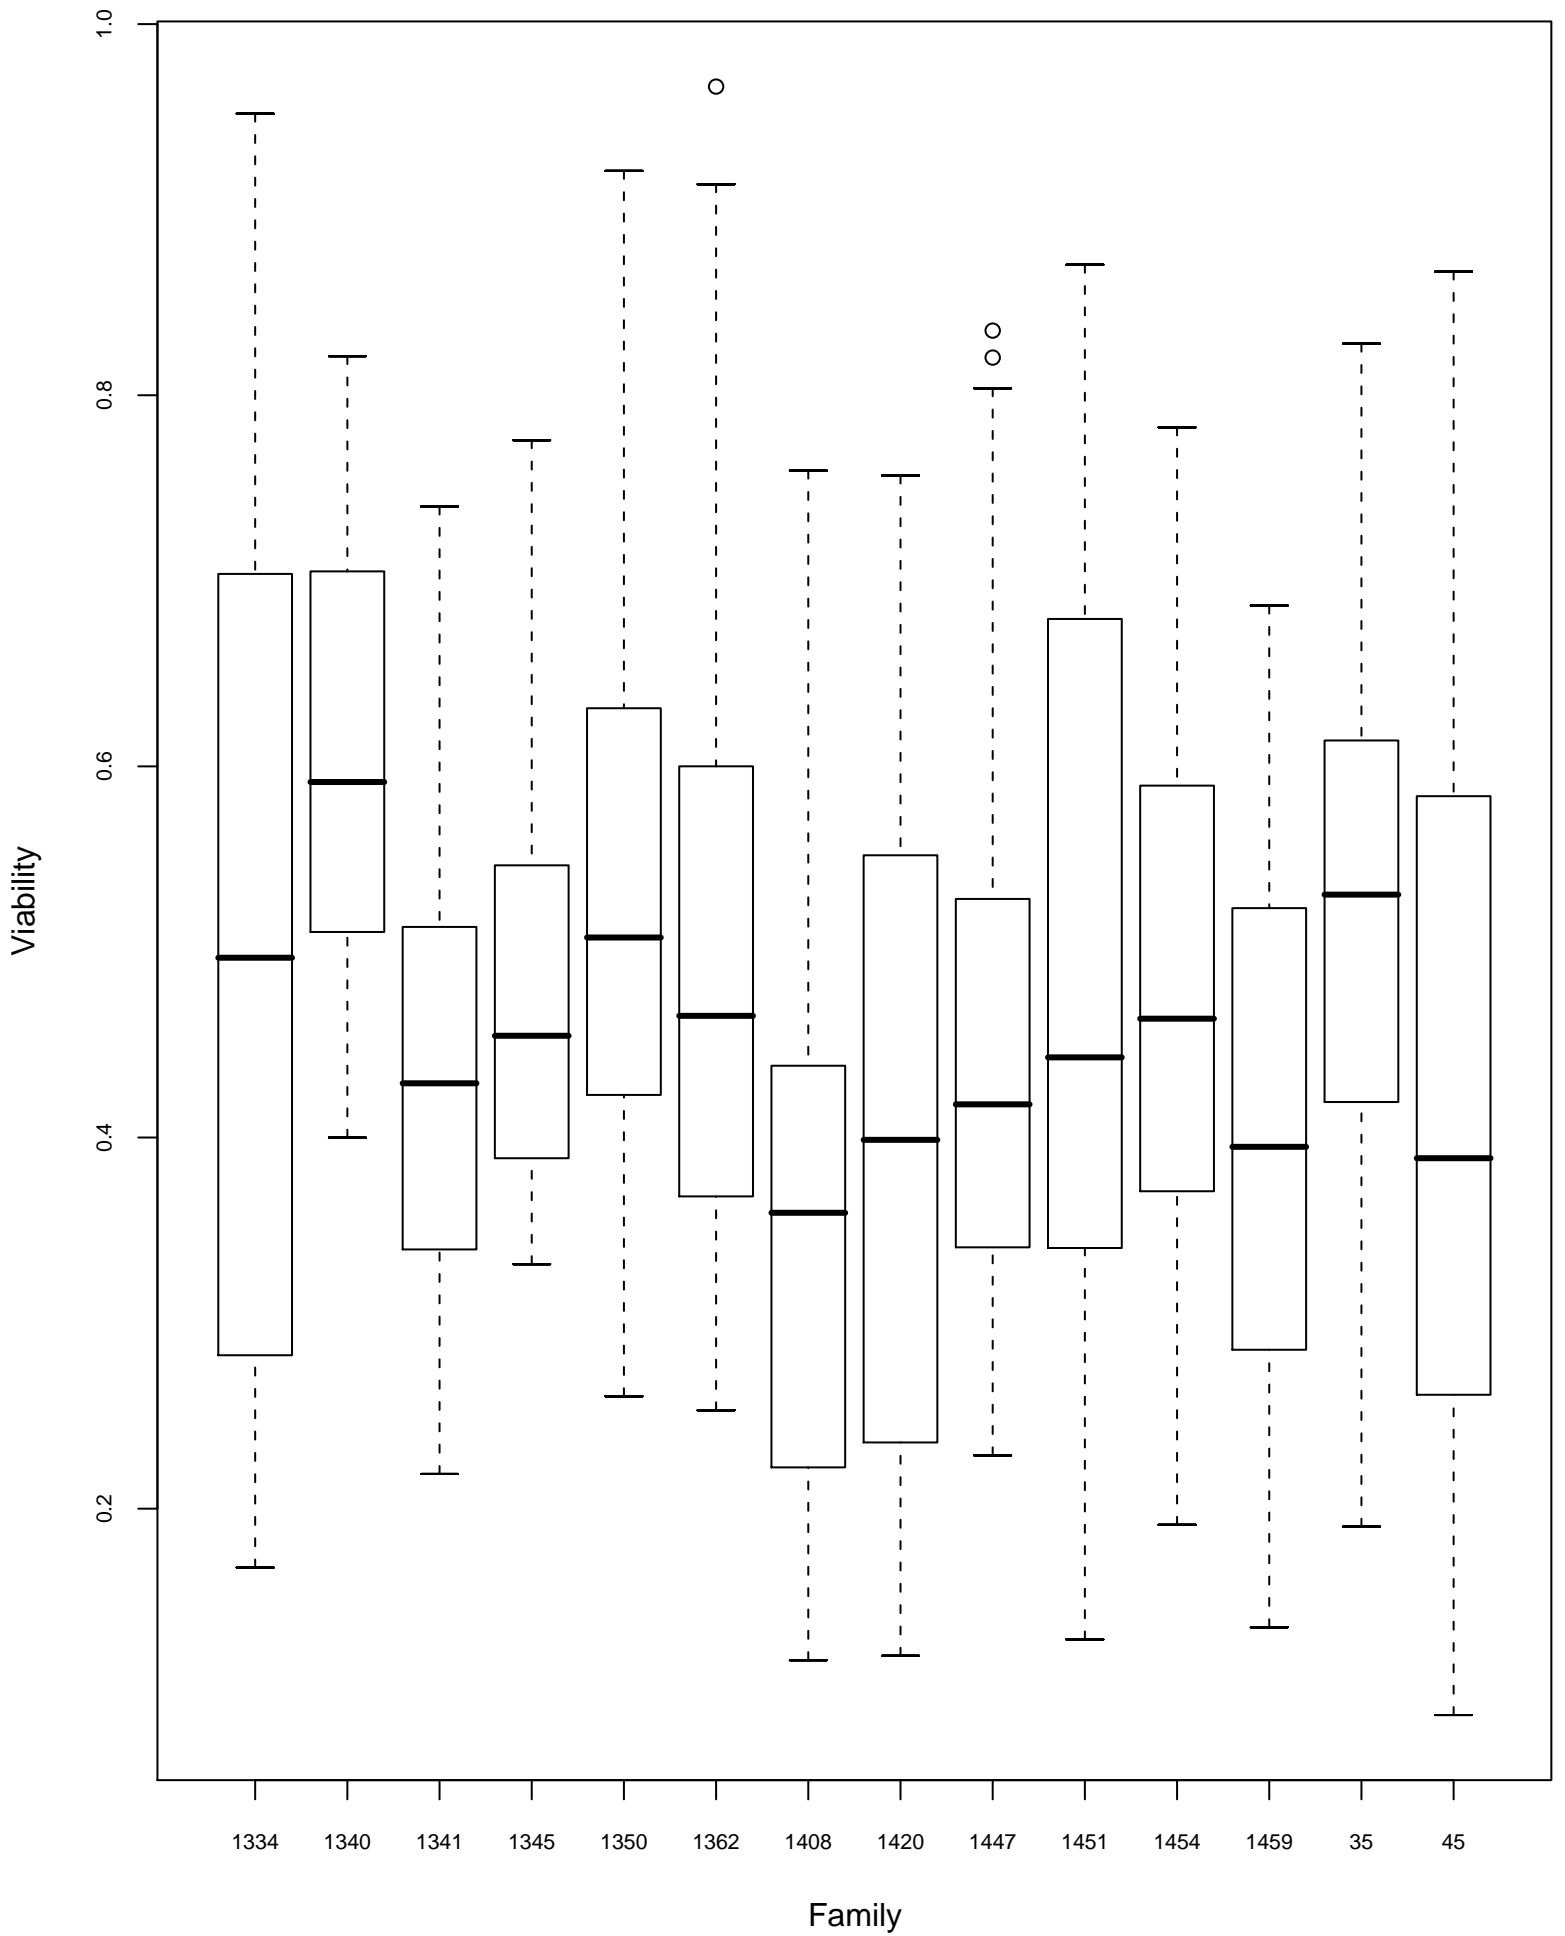

# Drug CICPT, dose 1 (mM)

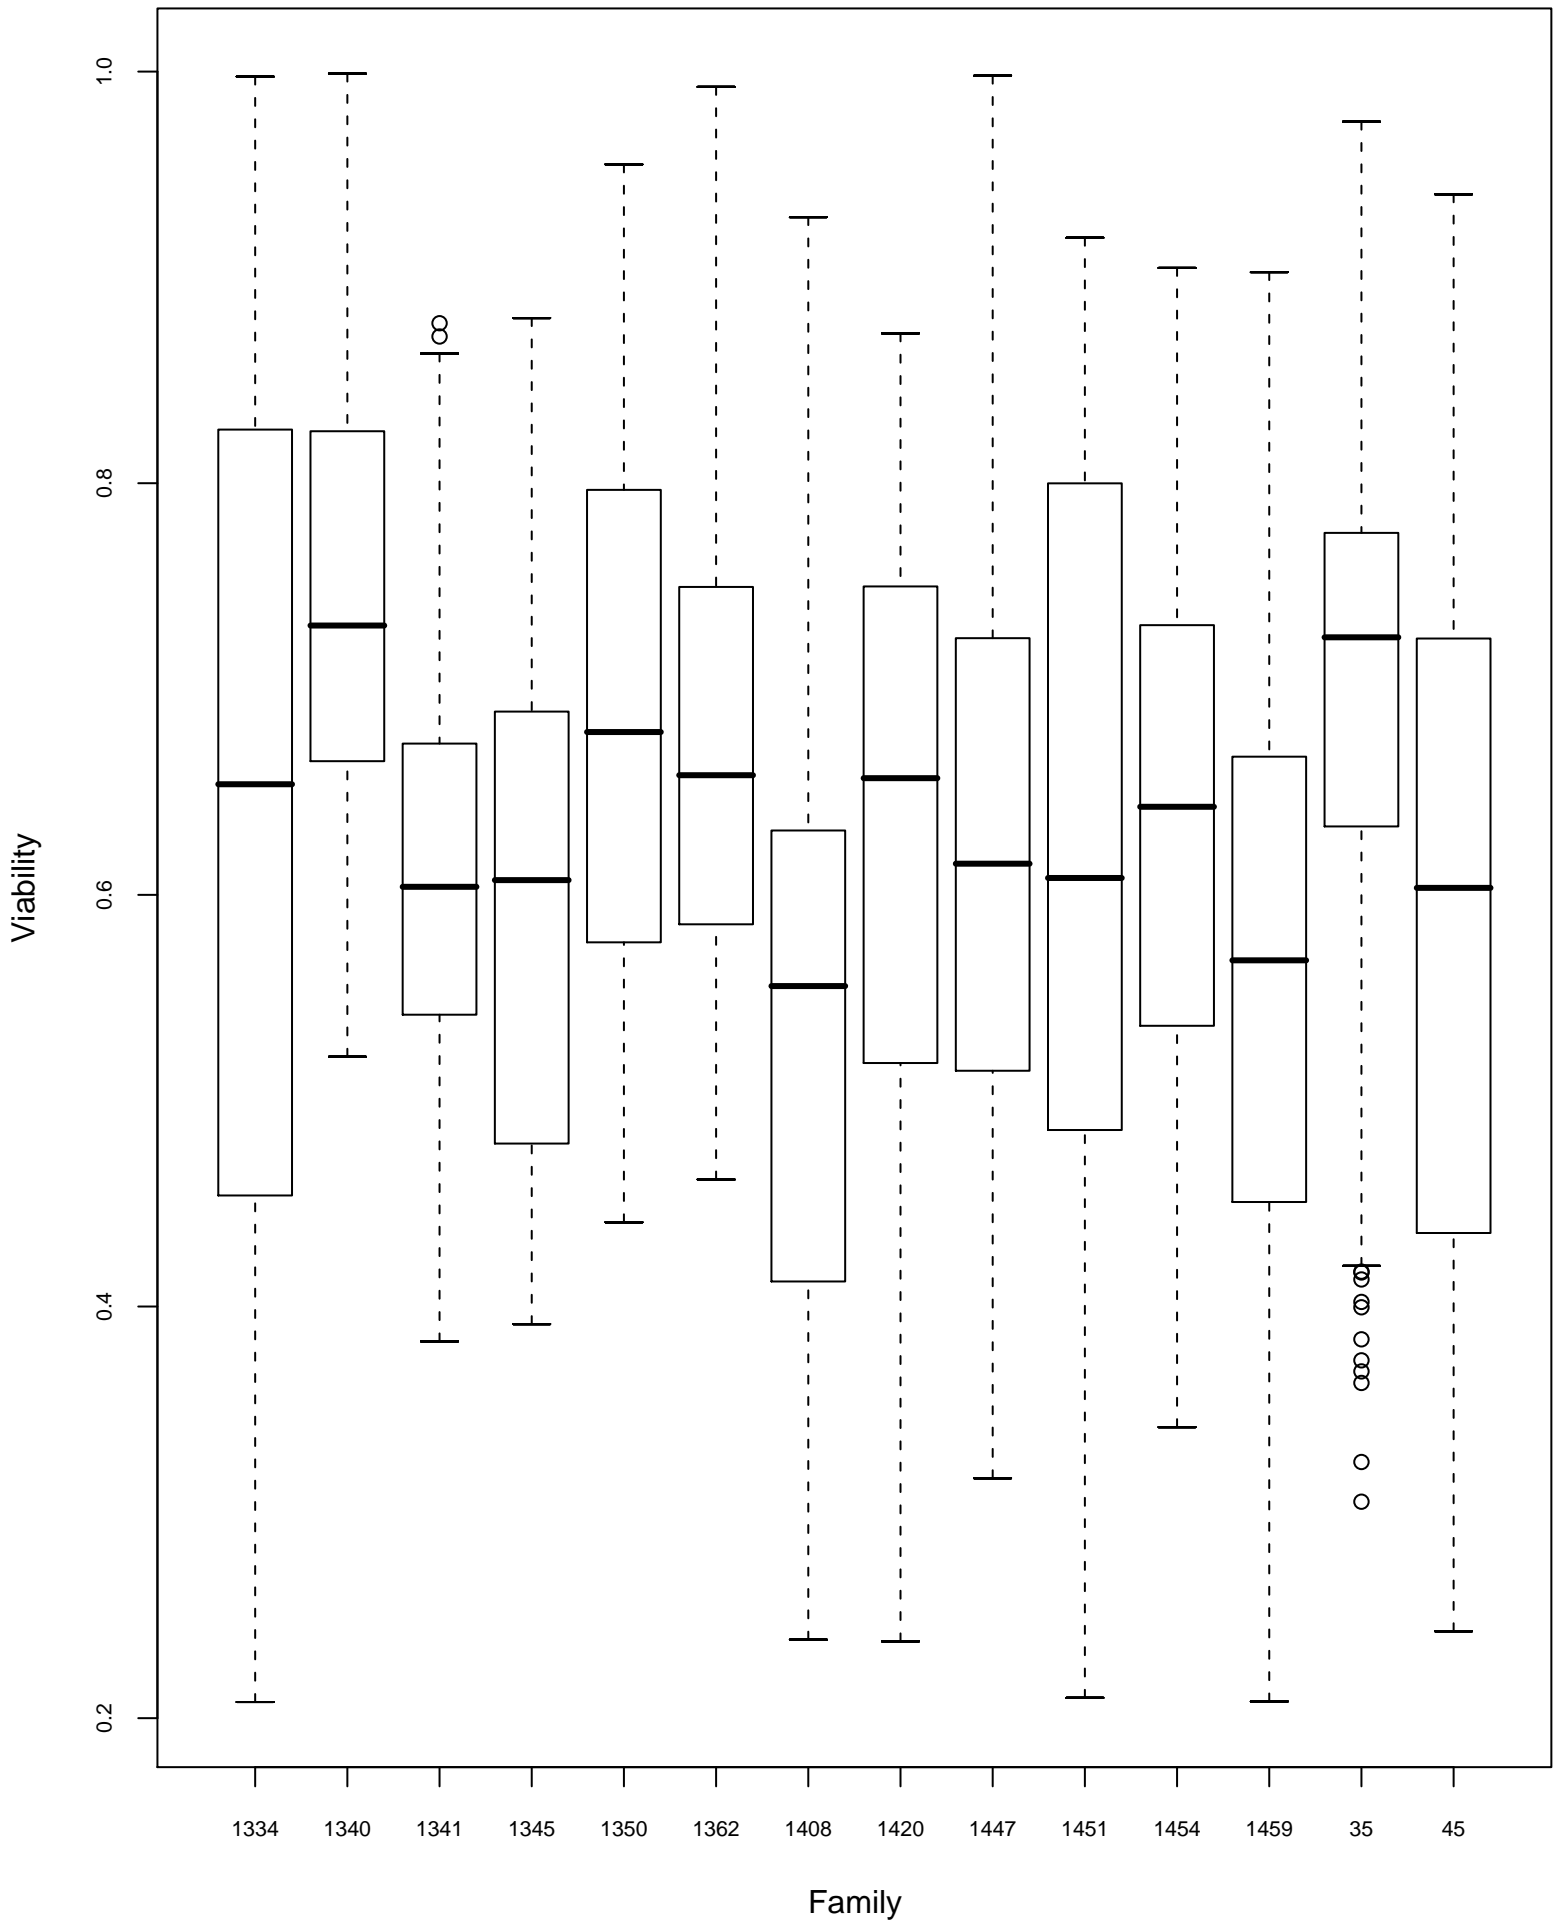

# Drug CICPT, dose 0.7 (mM)

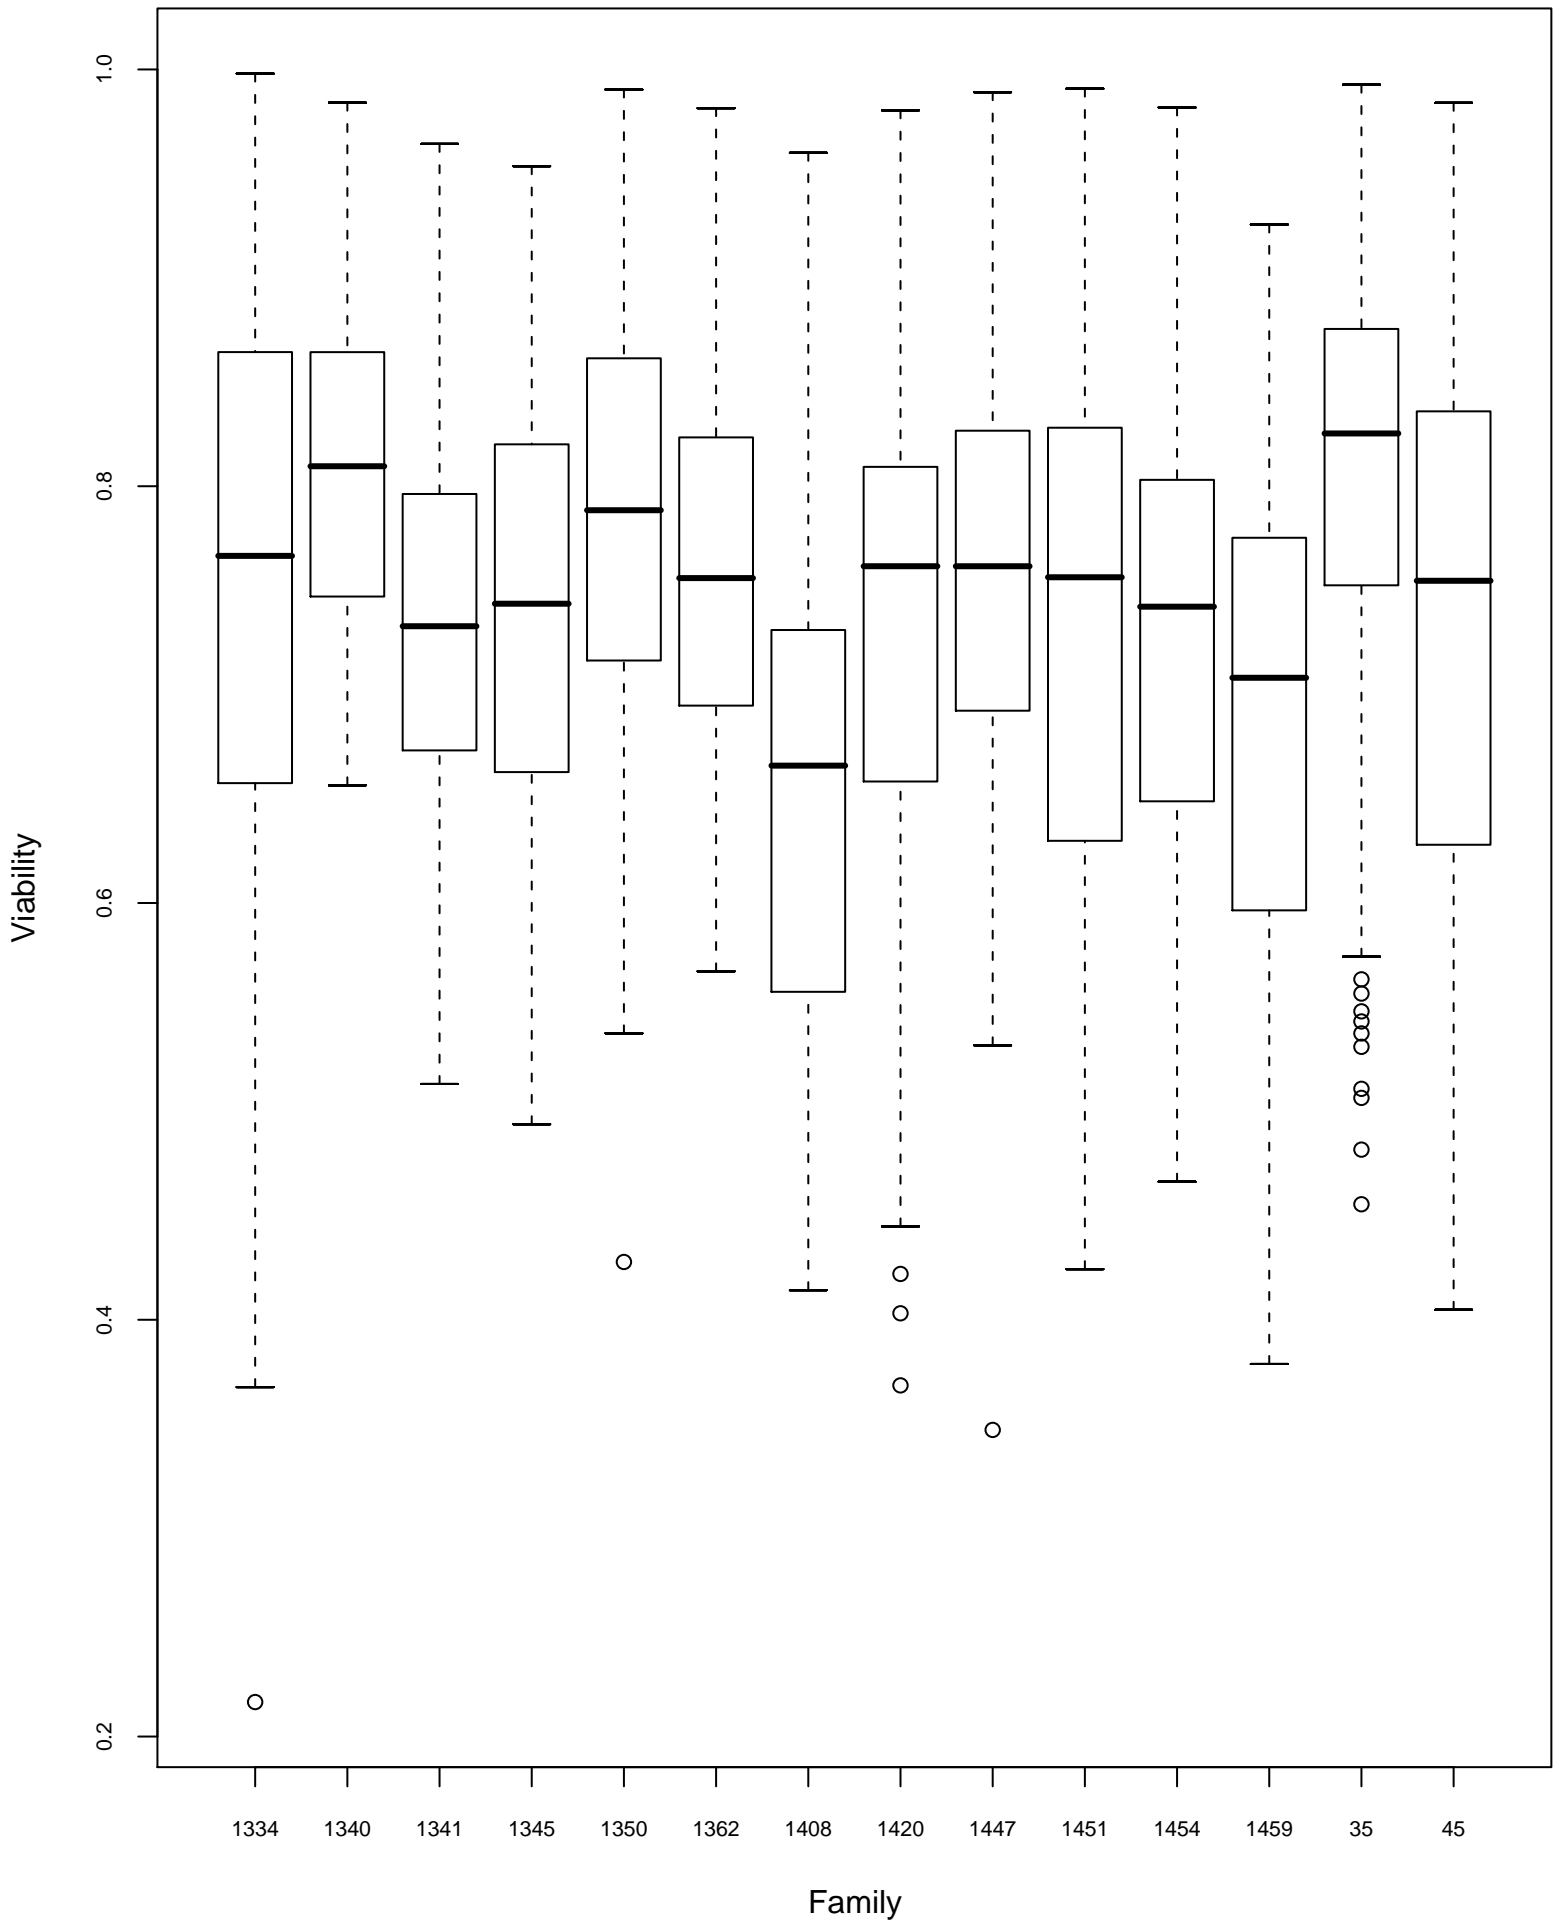

# Drug CICPT, dose 0.5 (mM)

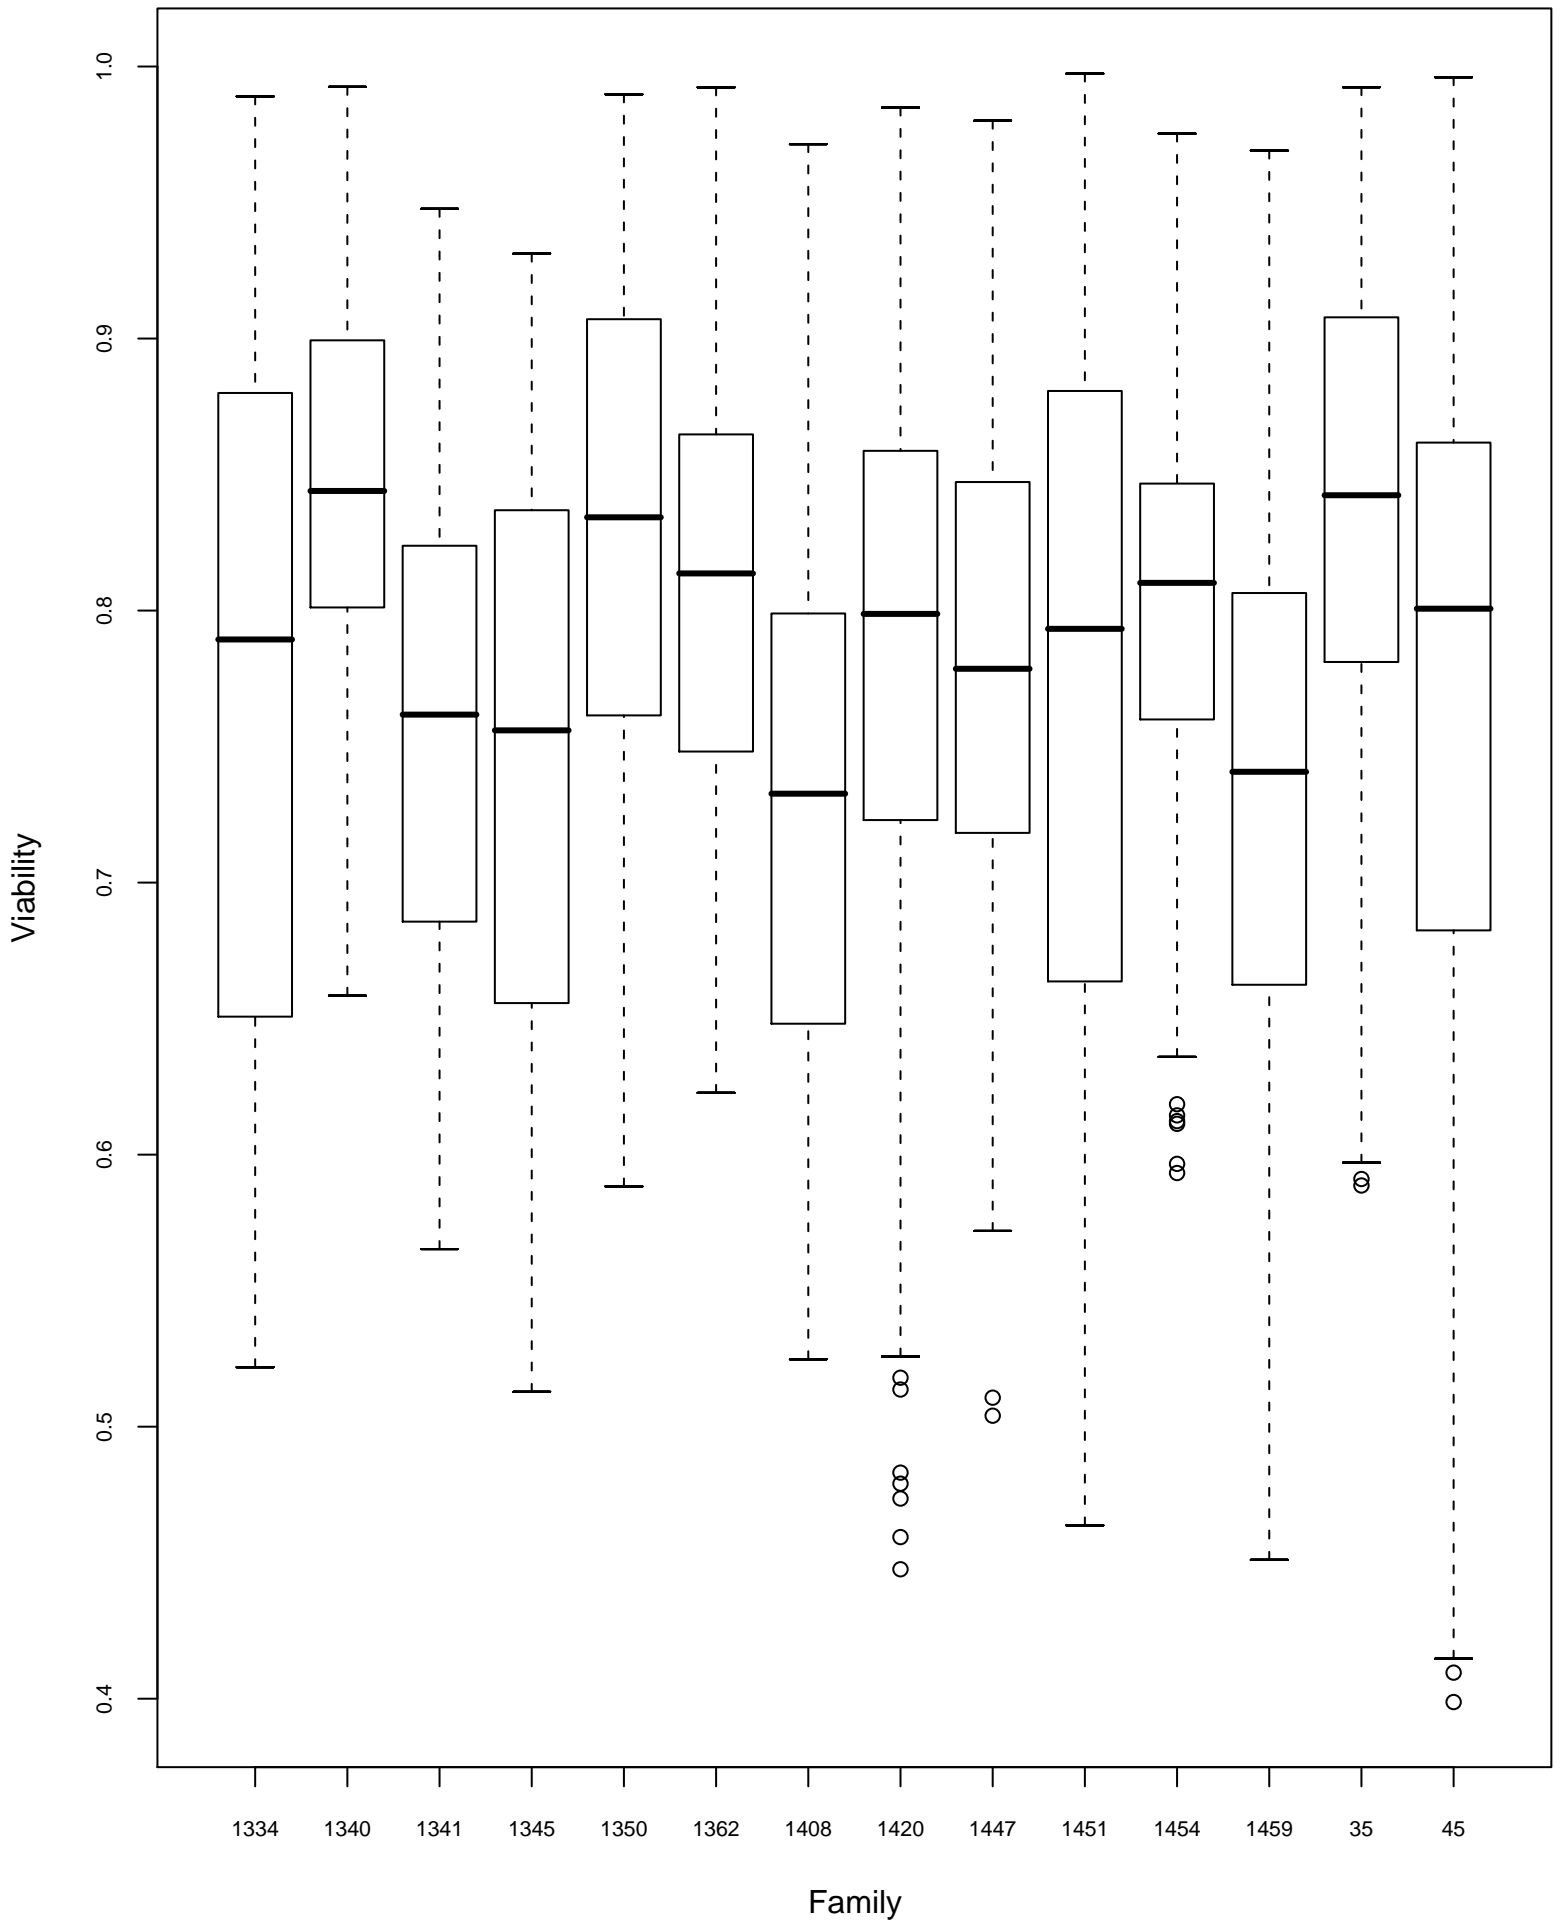

# Drug CICPT, dose 0.4 (mM)

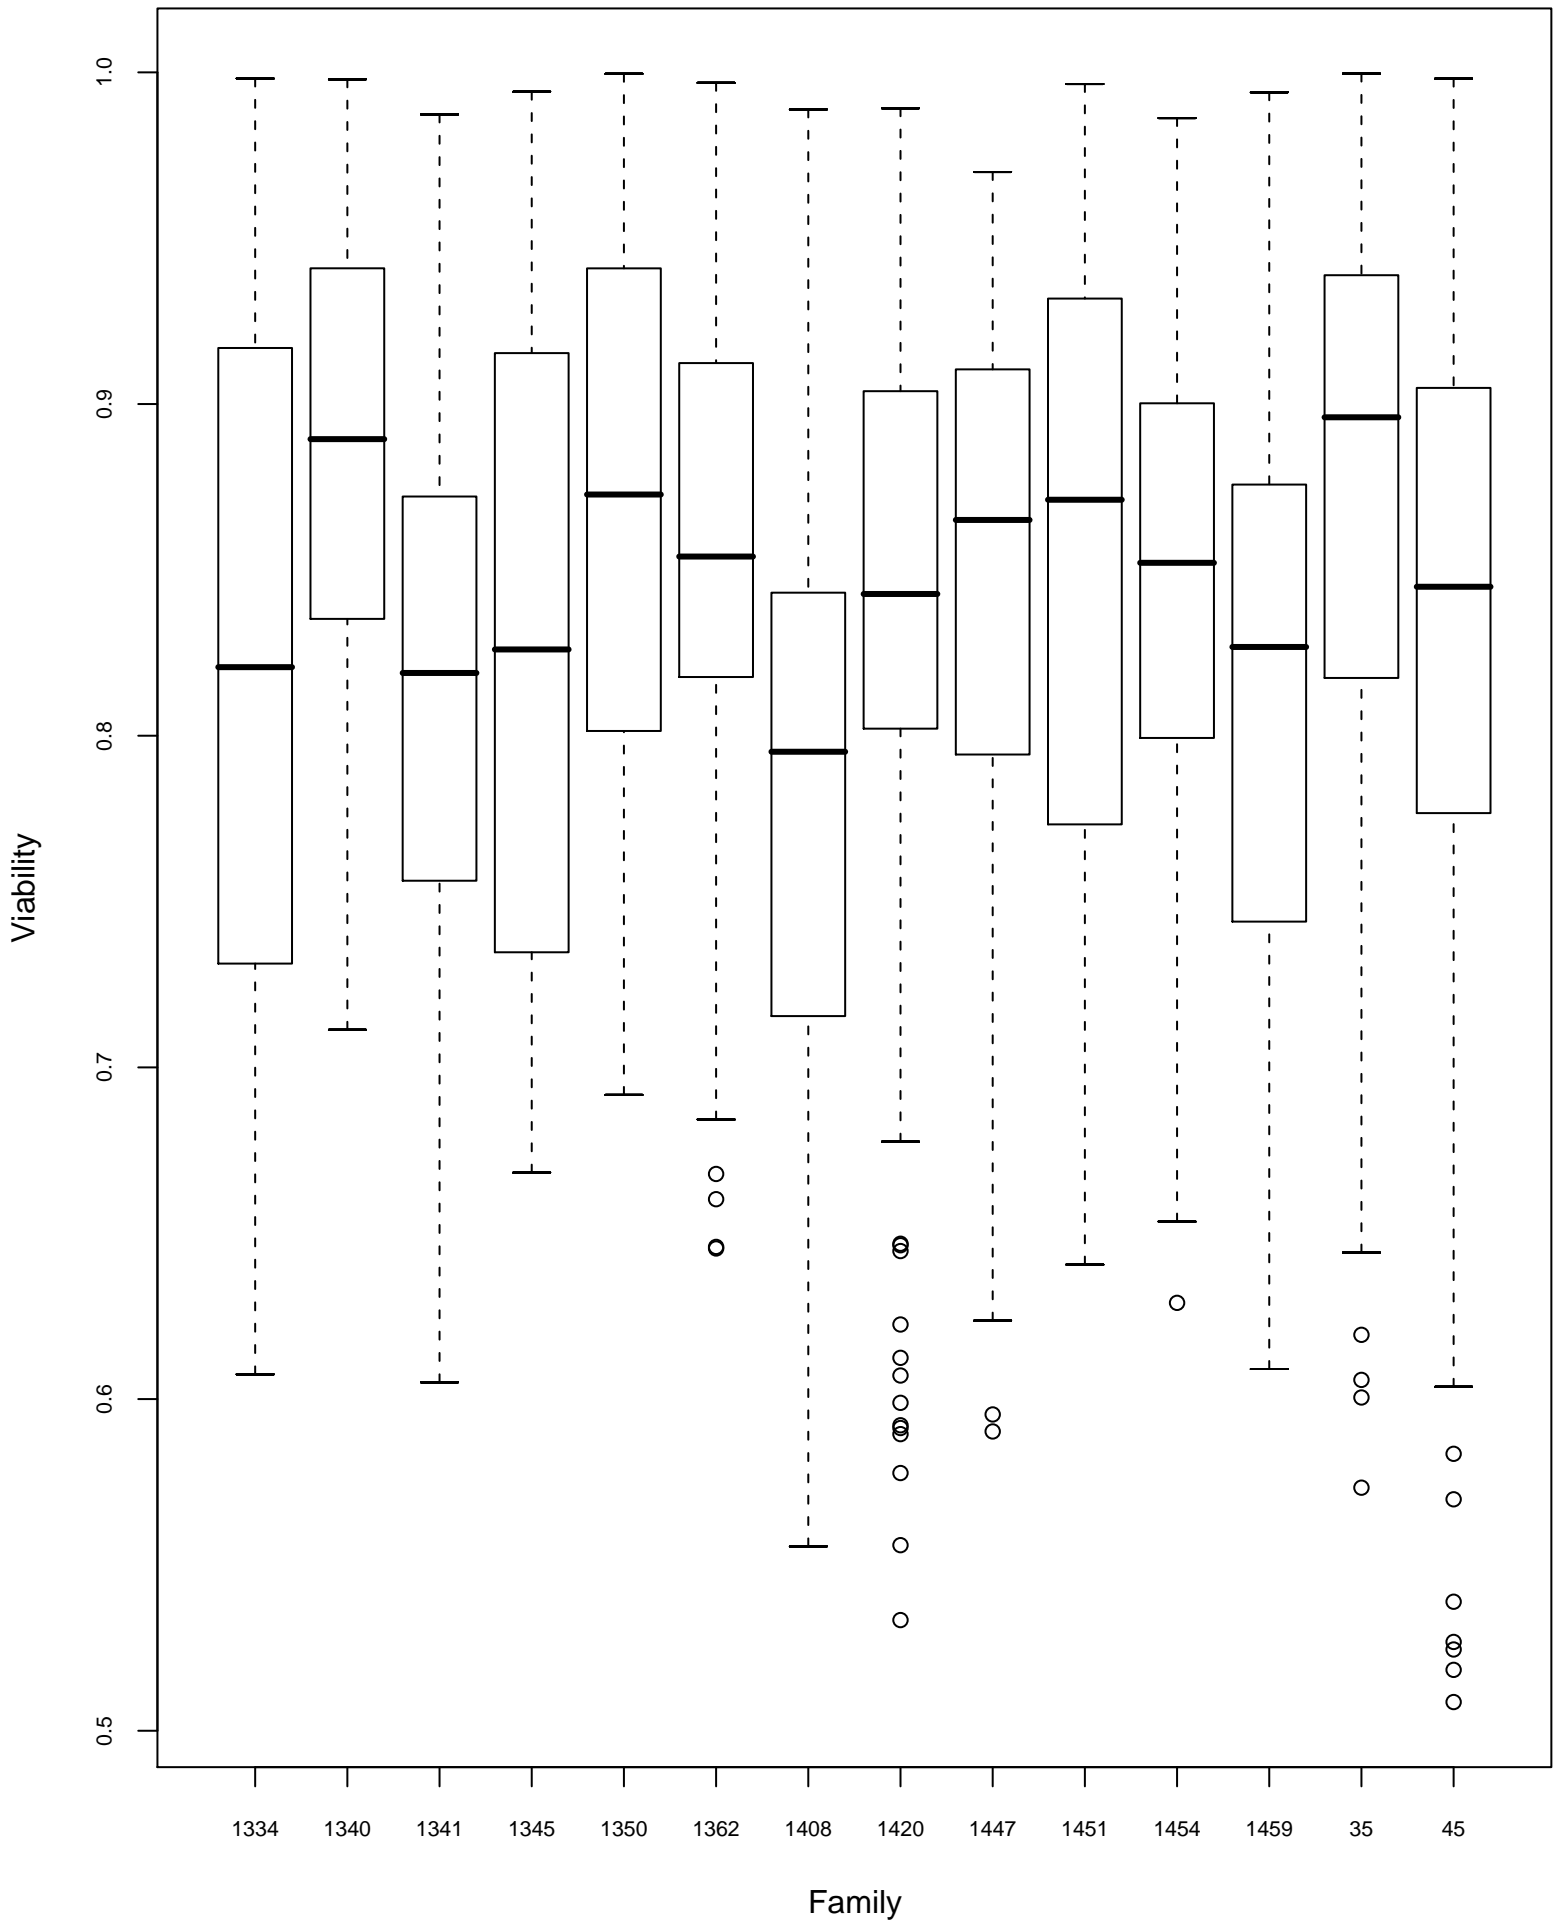



# Drug CICPT, dose 0.08 (mM)

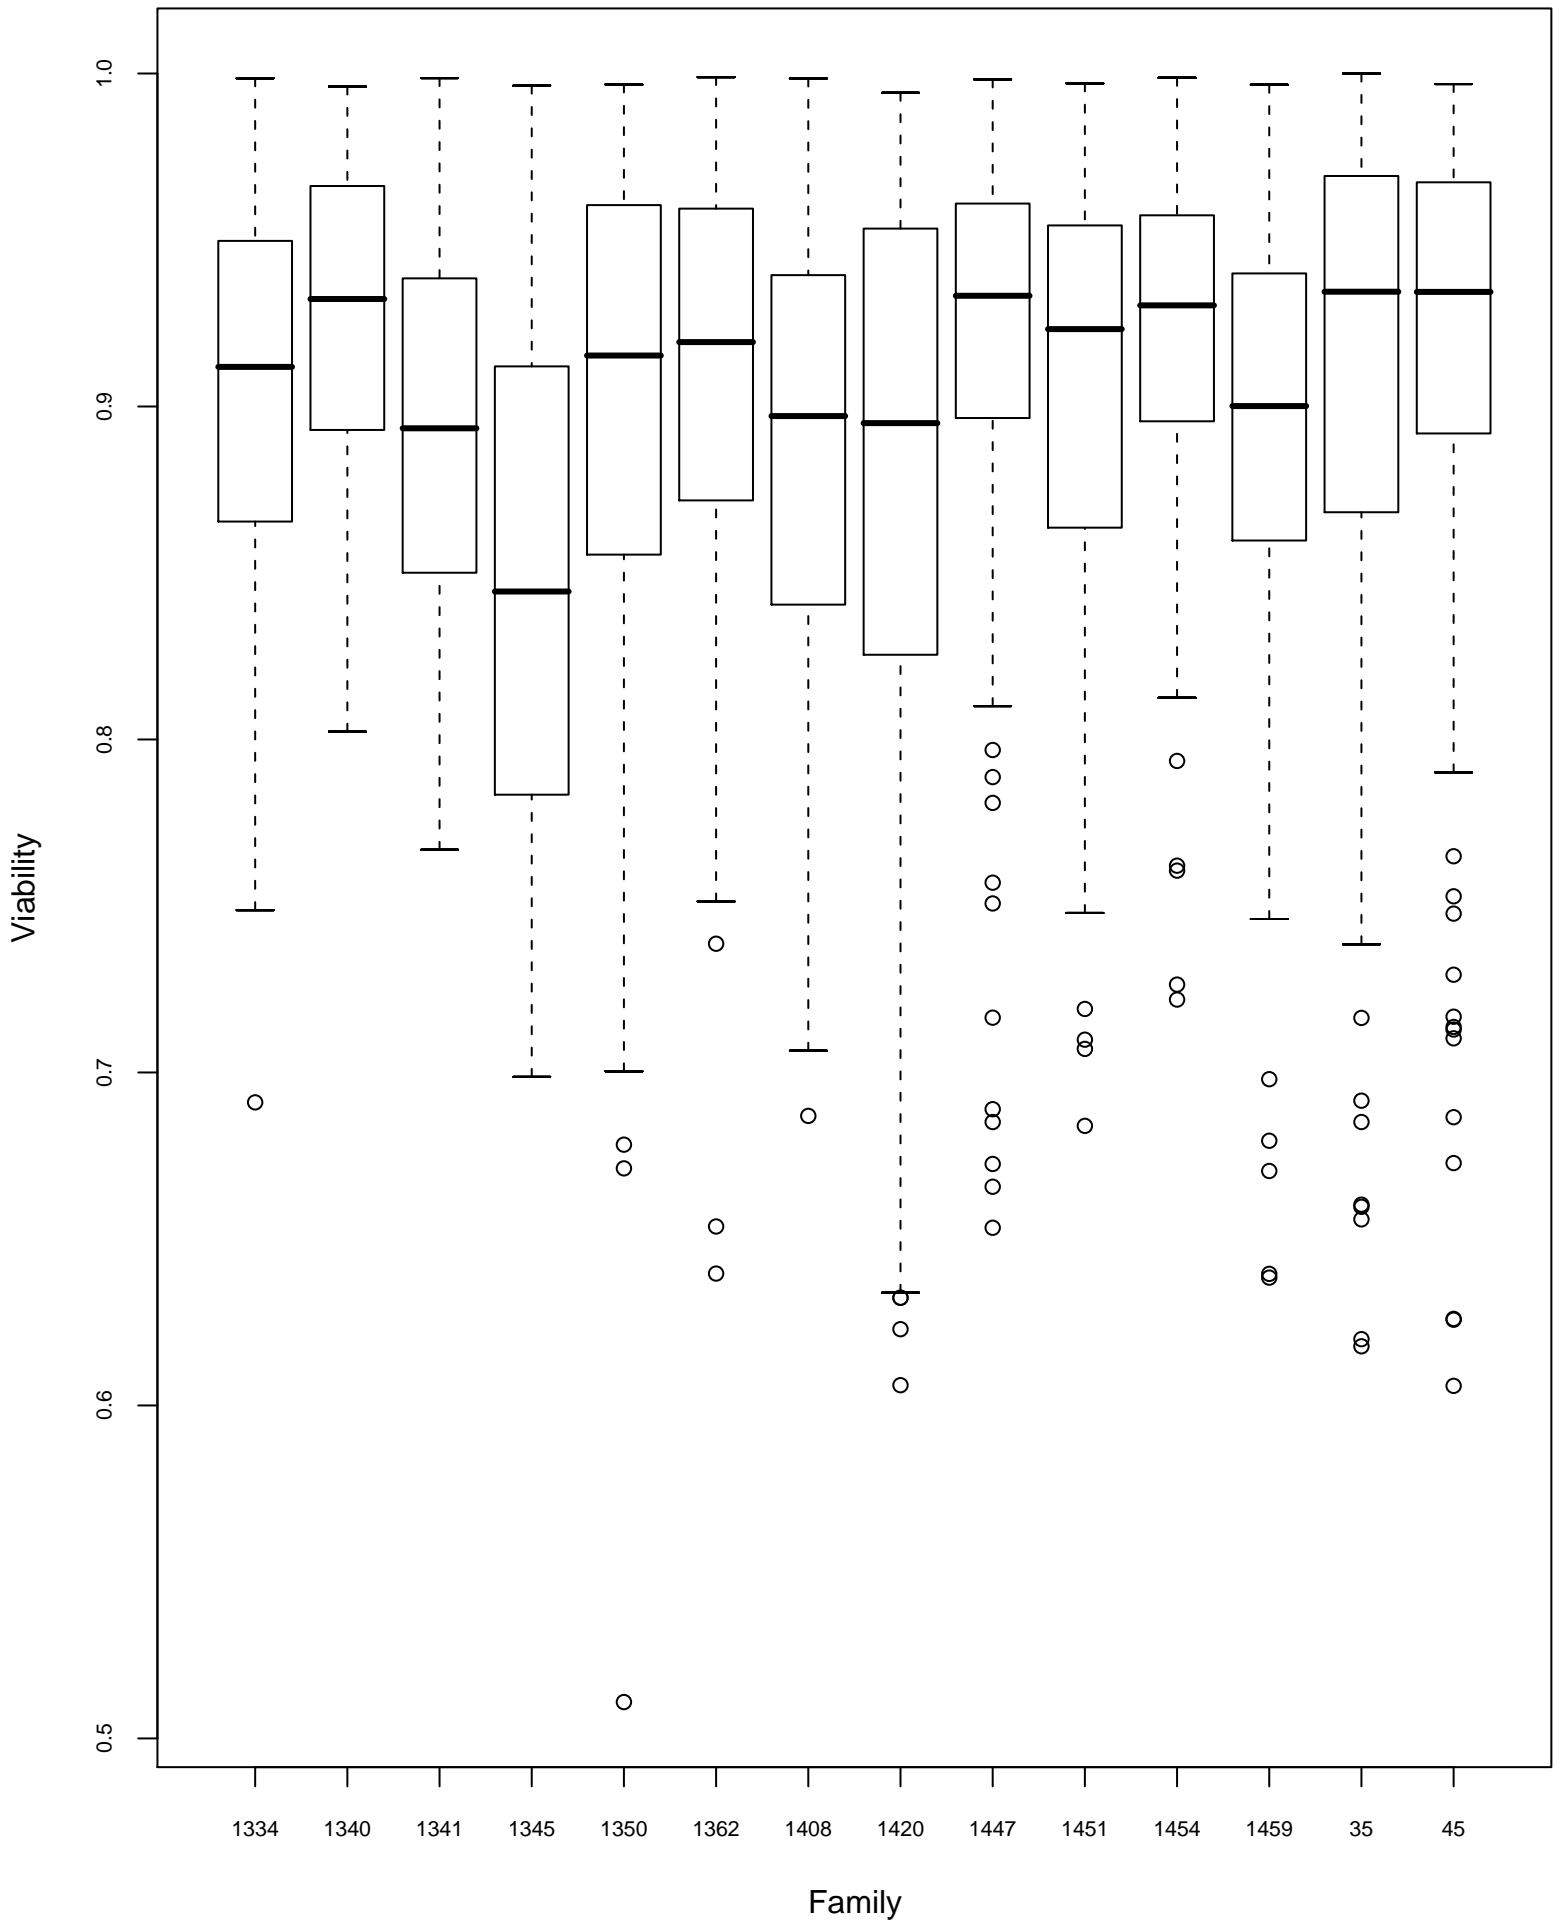

# Drug hCPT, dose 10 (mM)

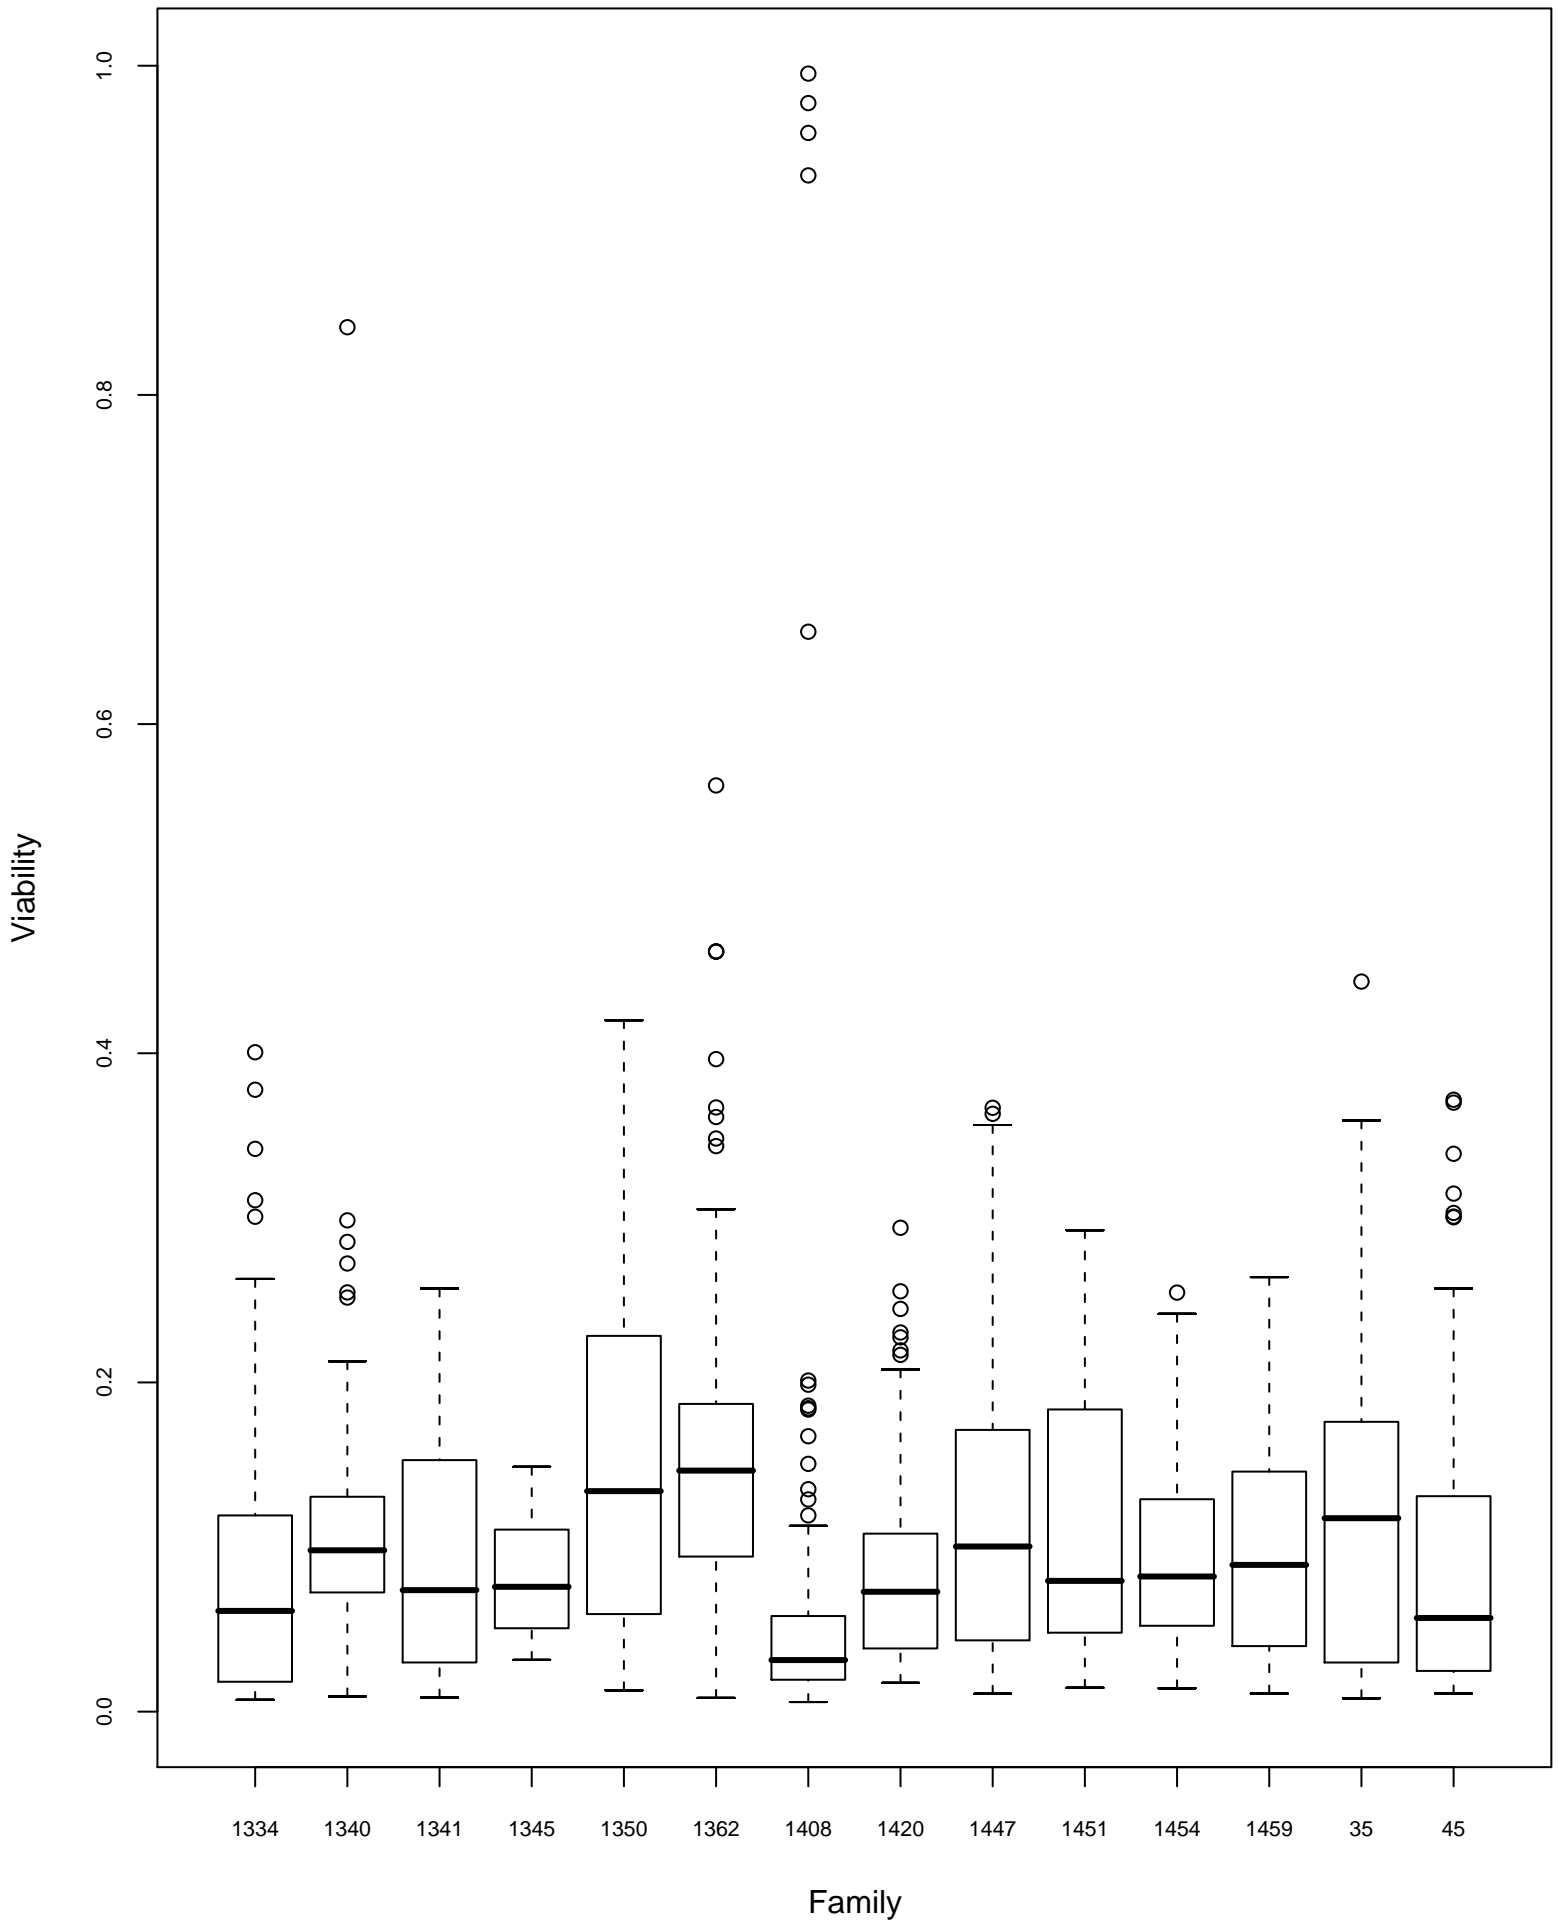

# Drug hCPT, dose 2 (mM)

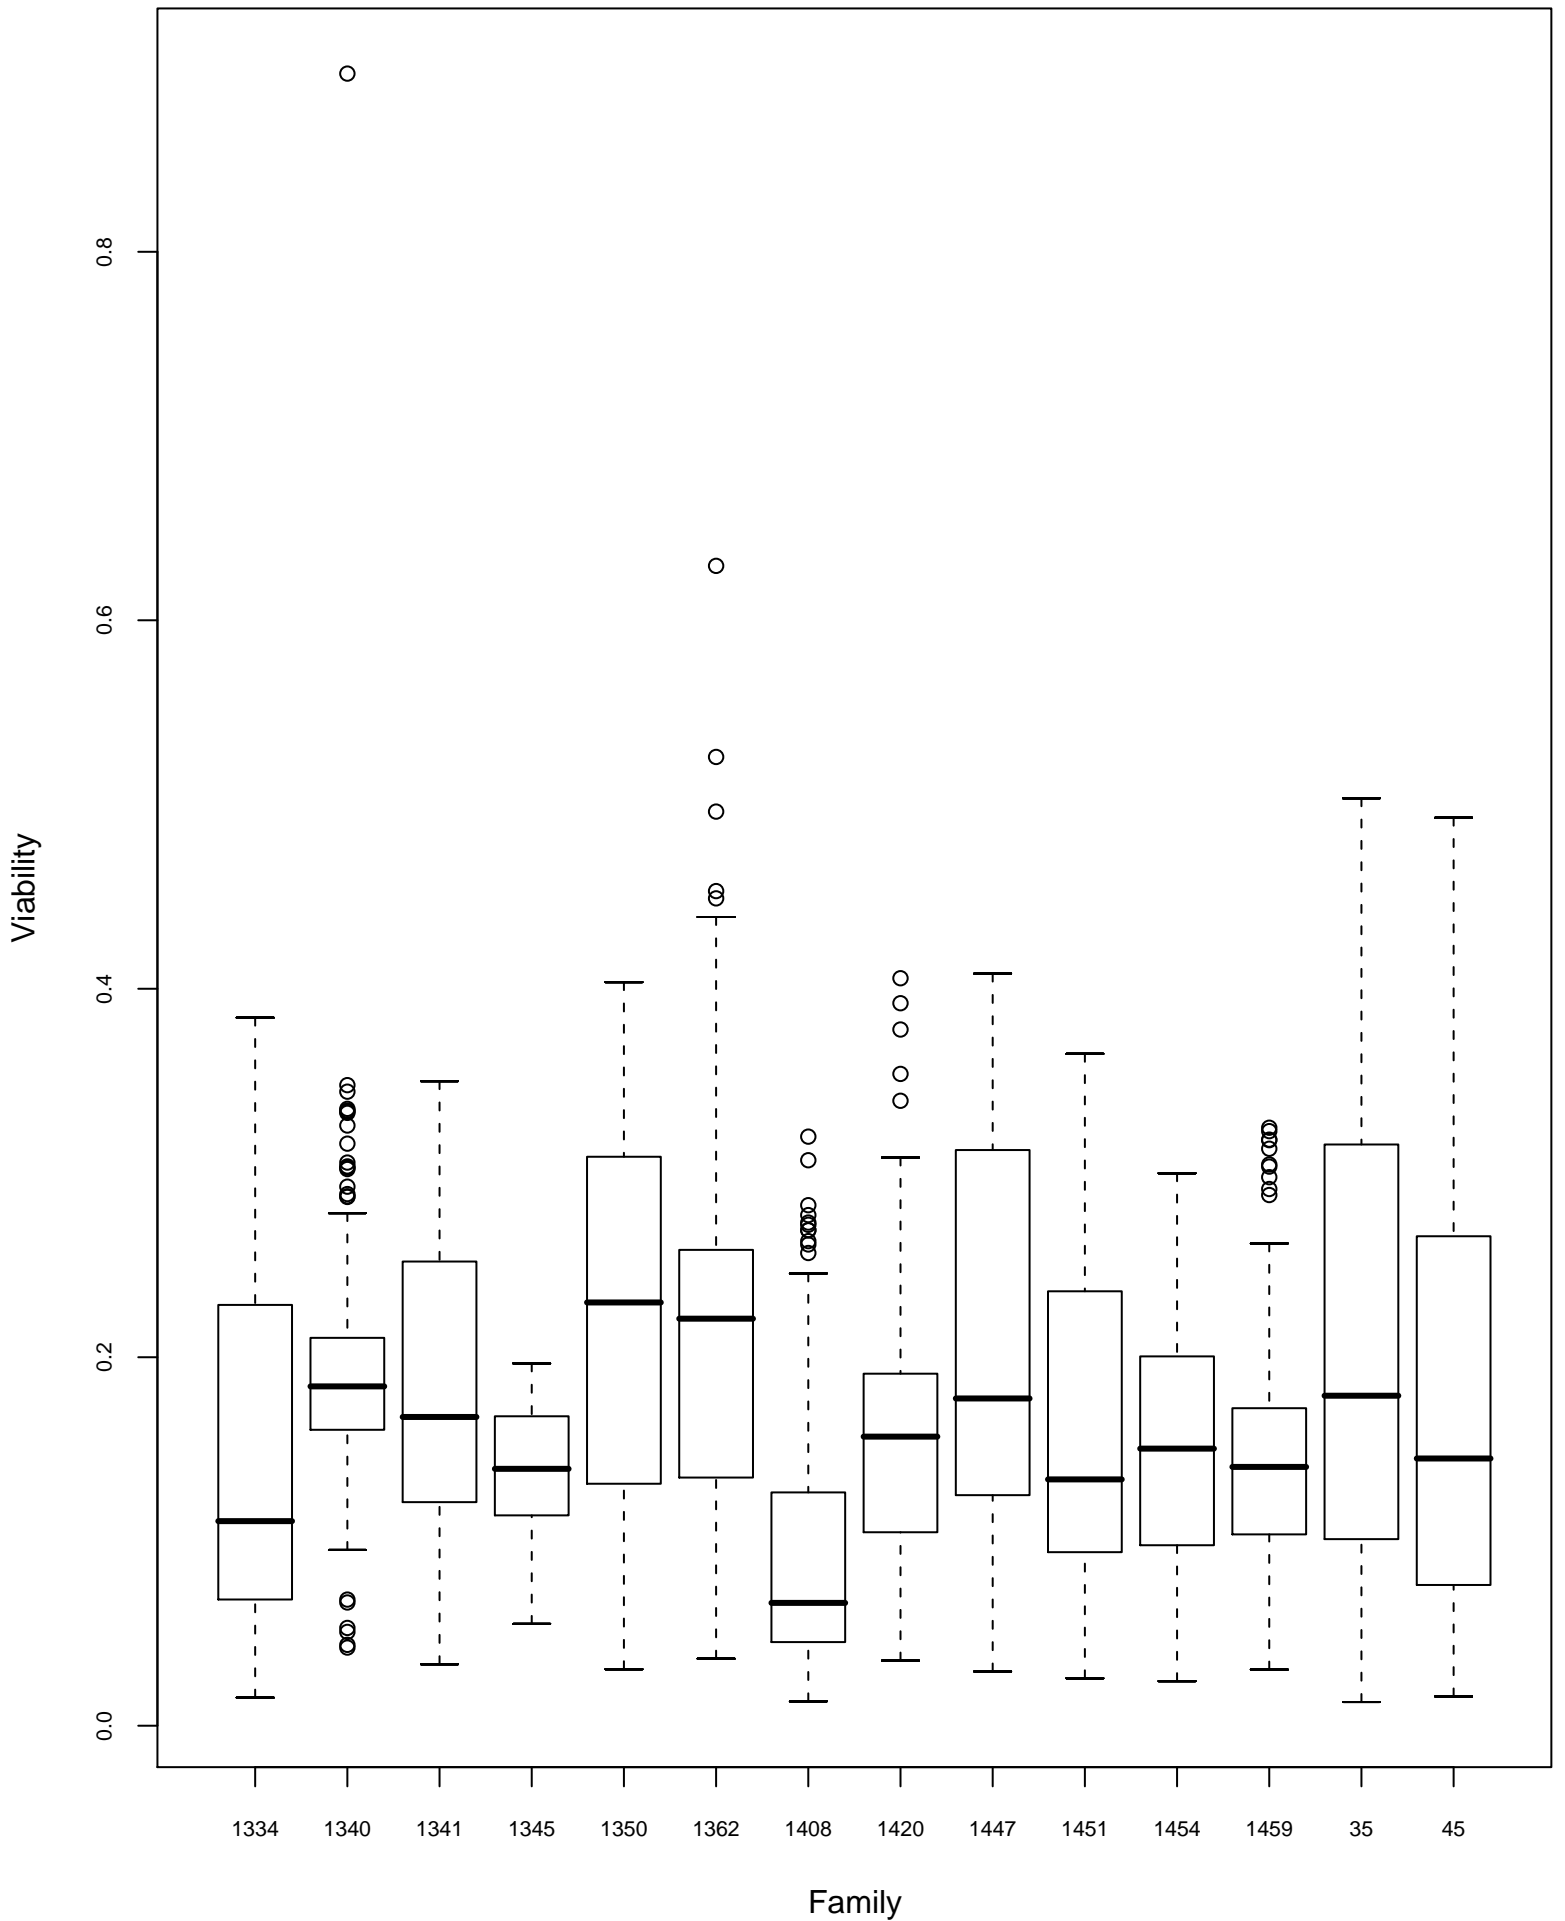

# Drug hCPT, dose 0.08 (mM)

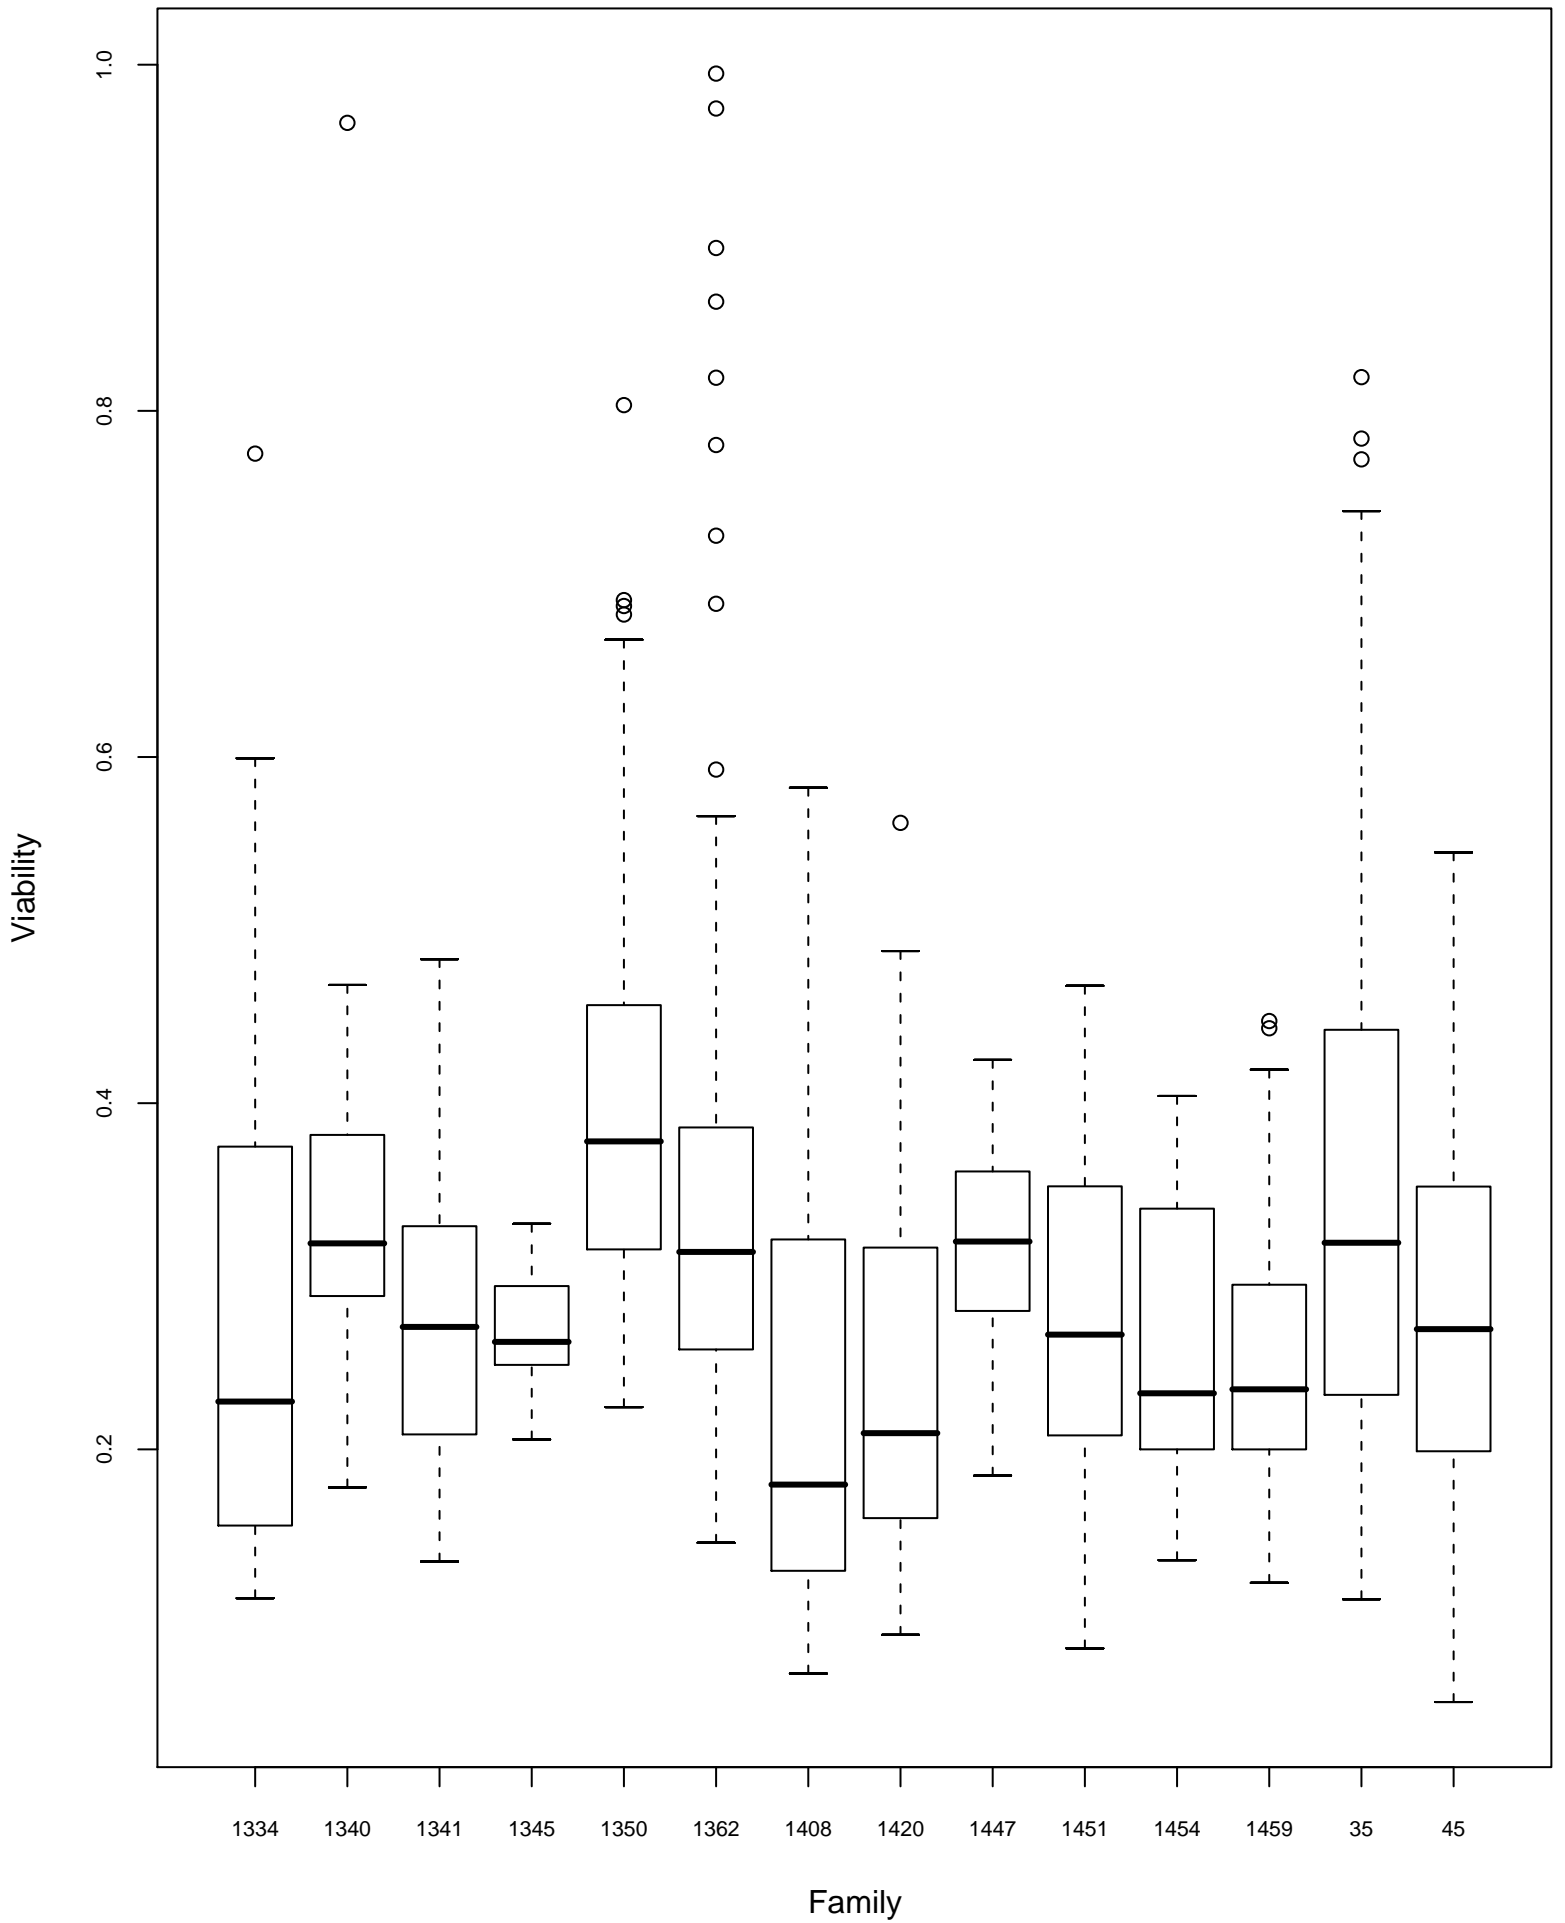

# Drug hCPT, dose 0.025 (mM)

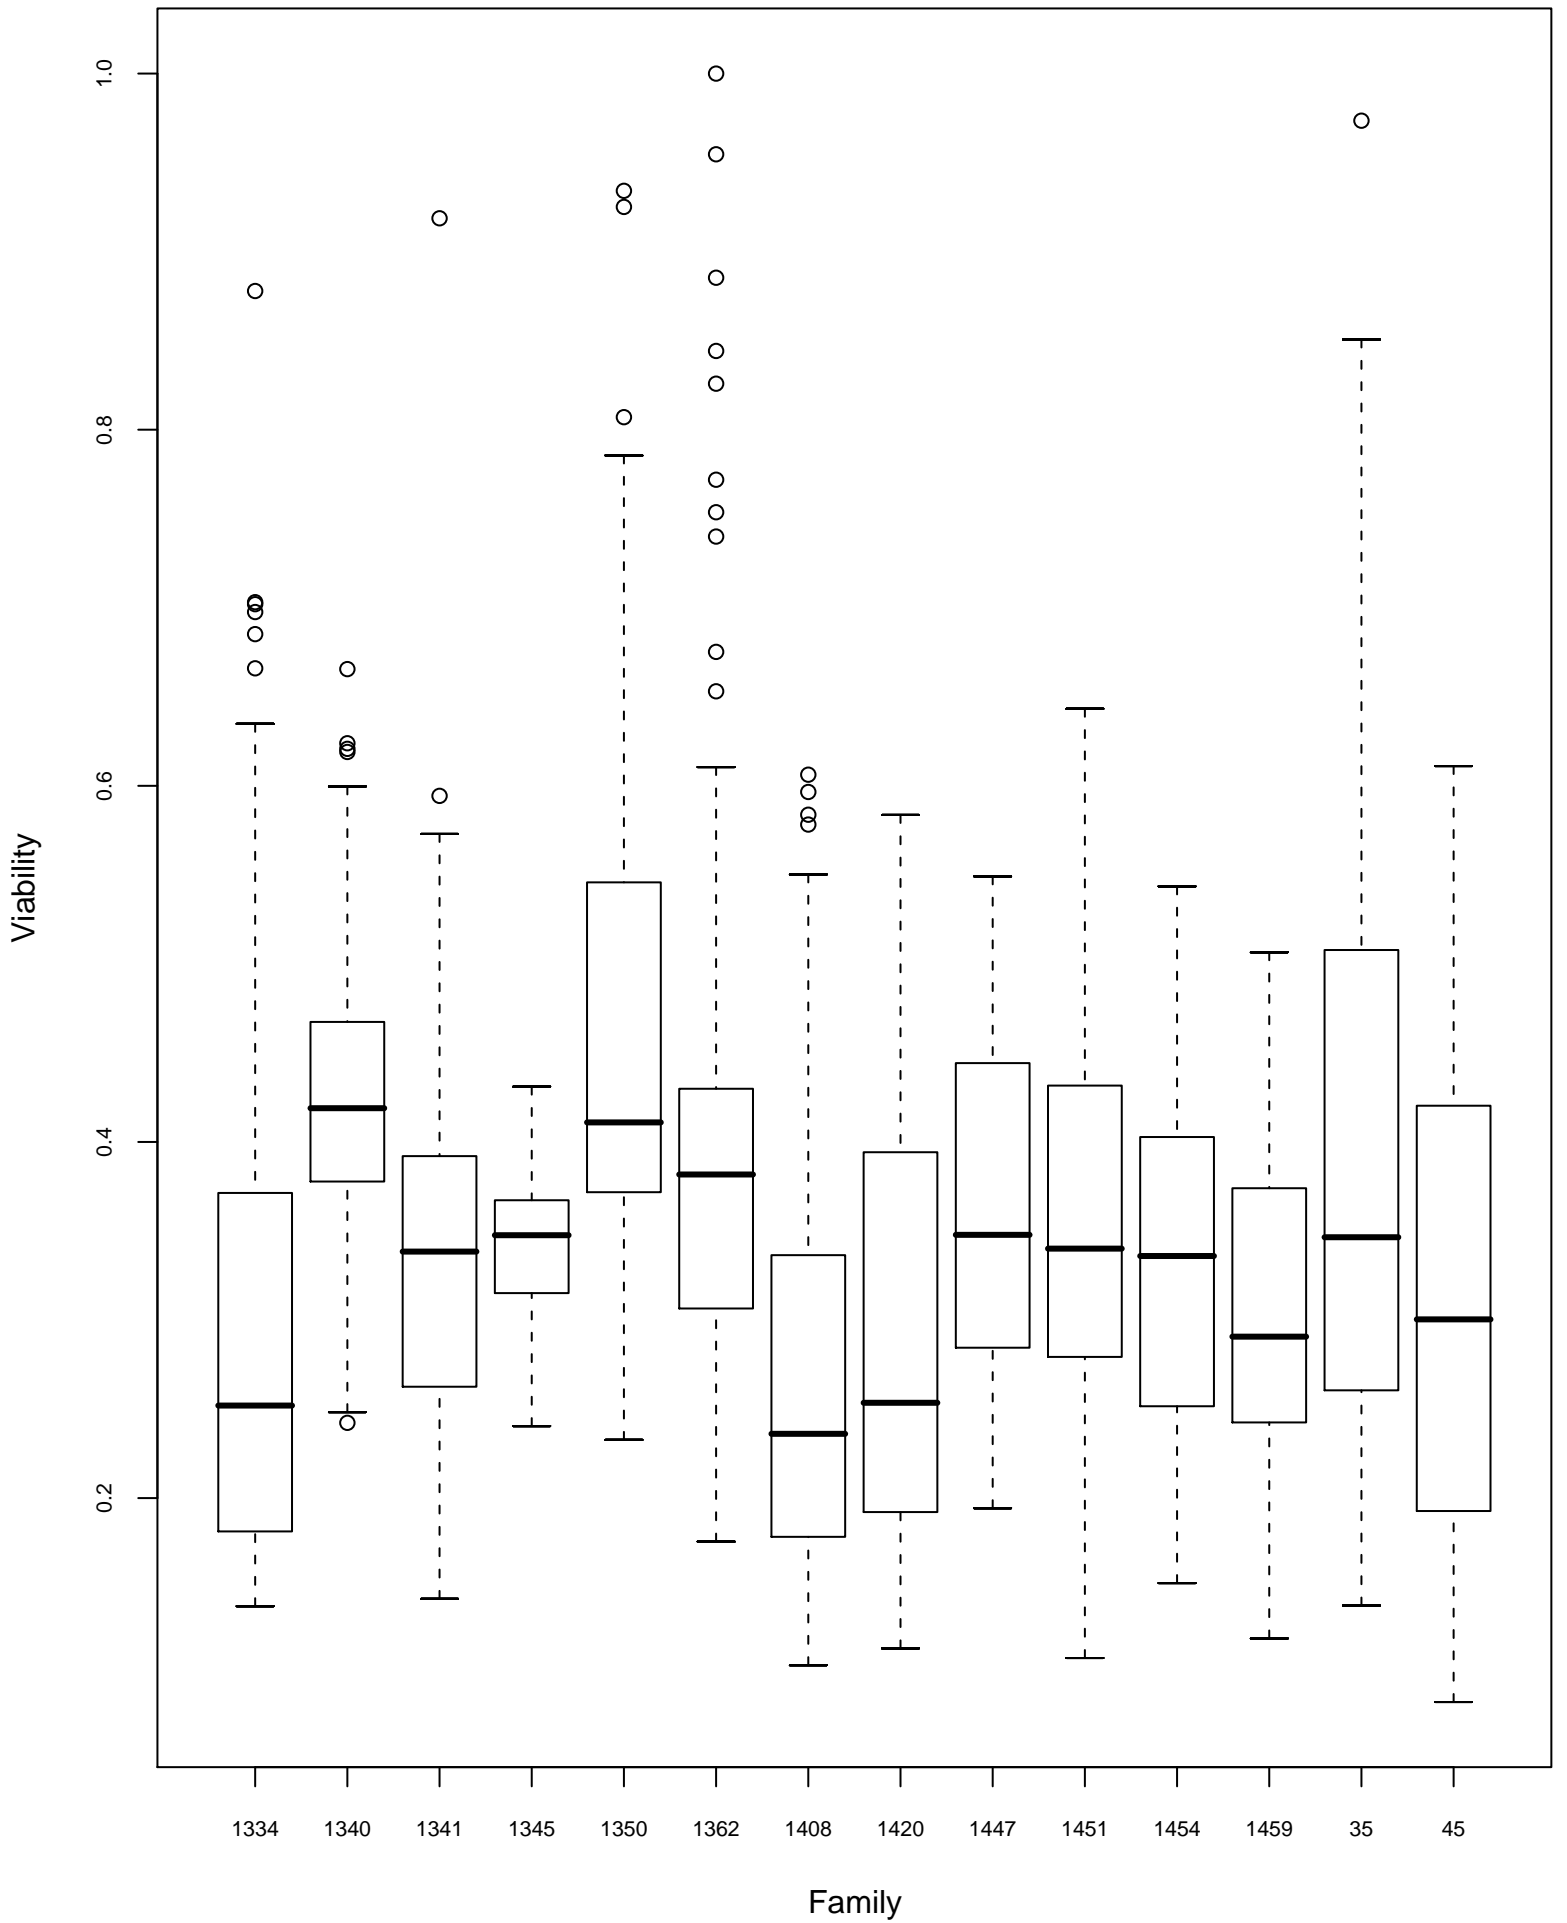

# Drug hCPT, dose 0.015 (mM)

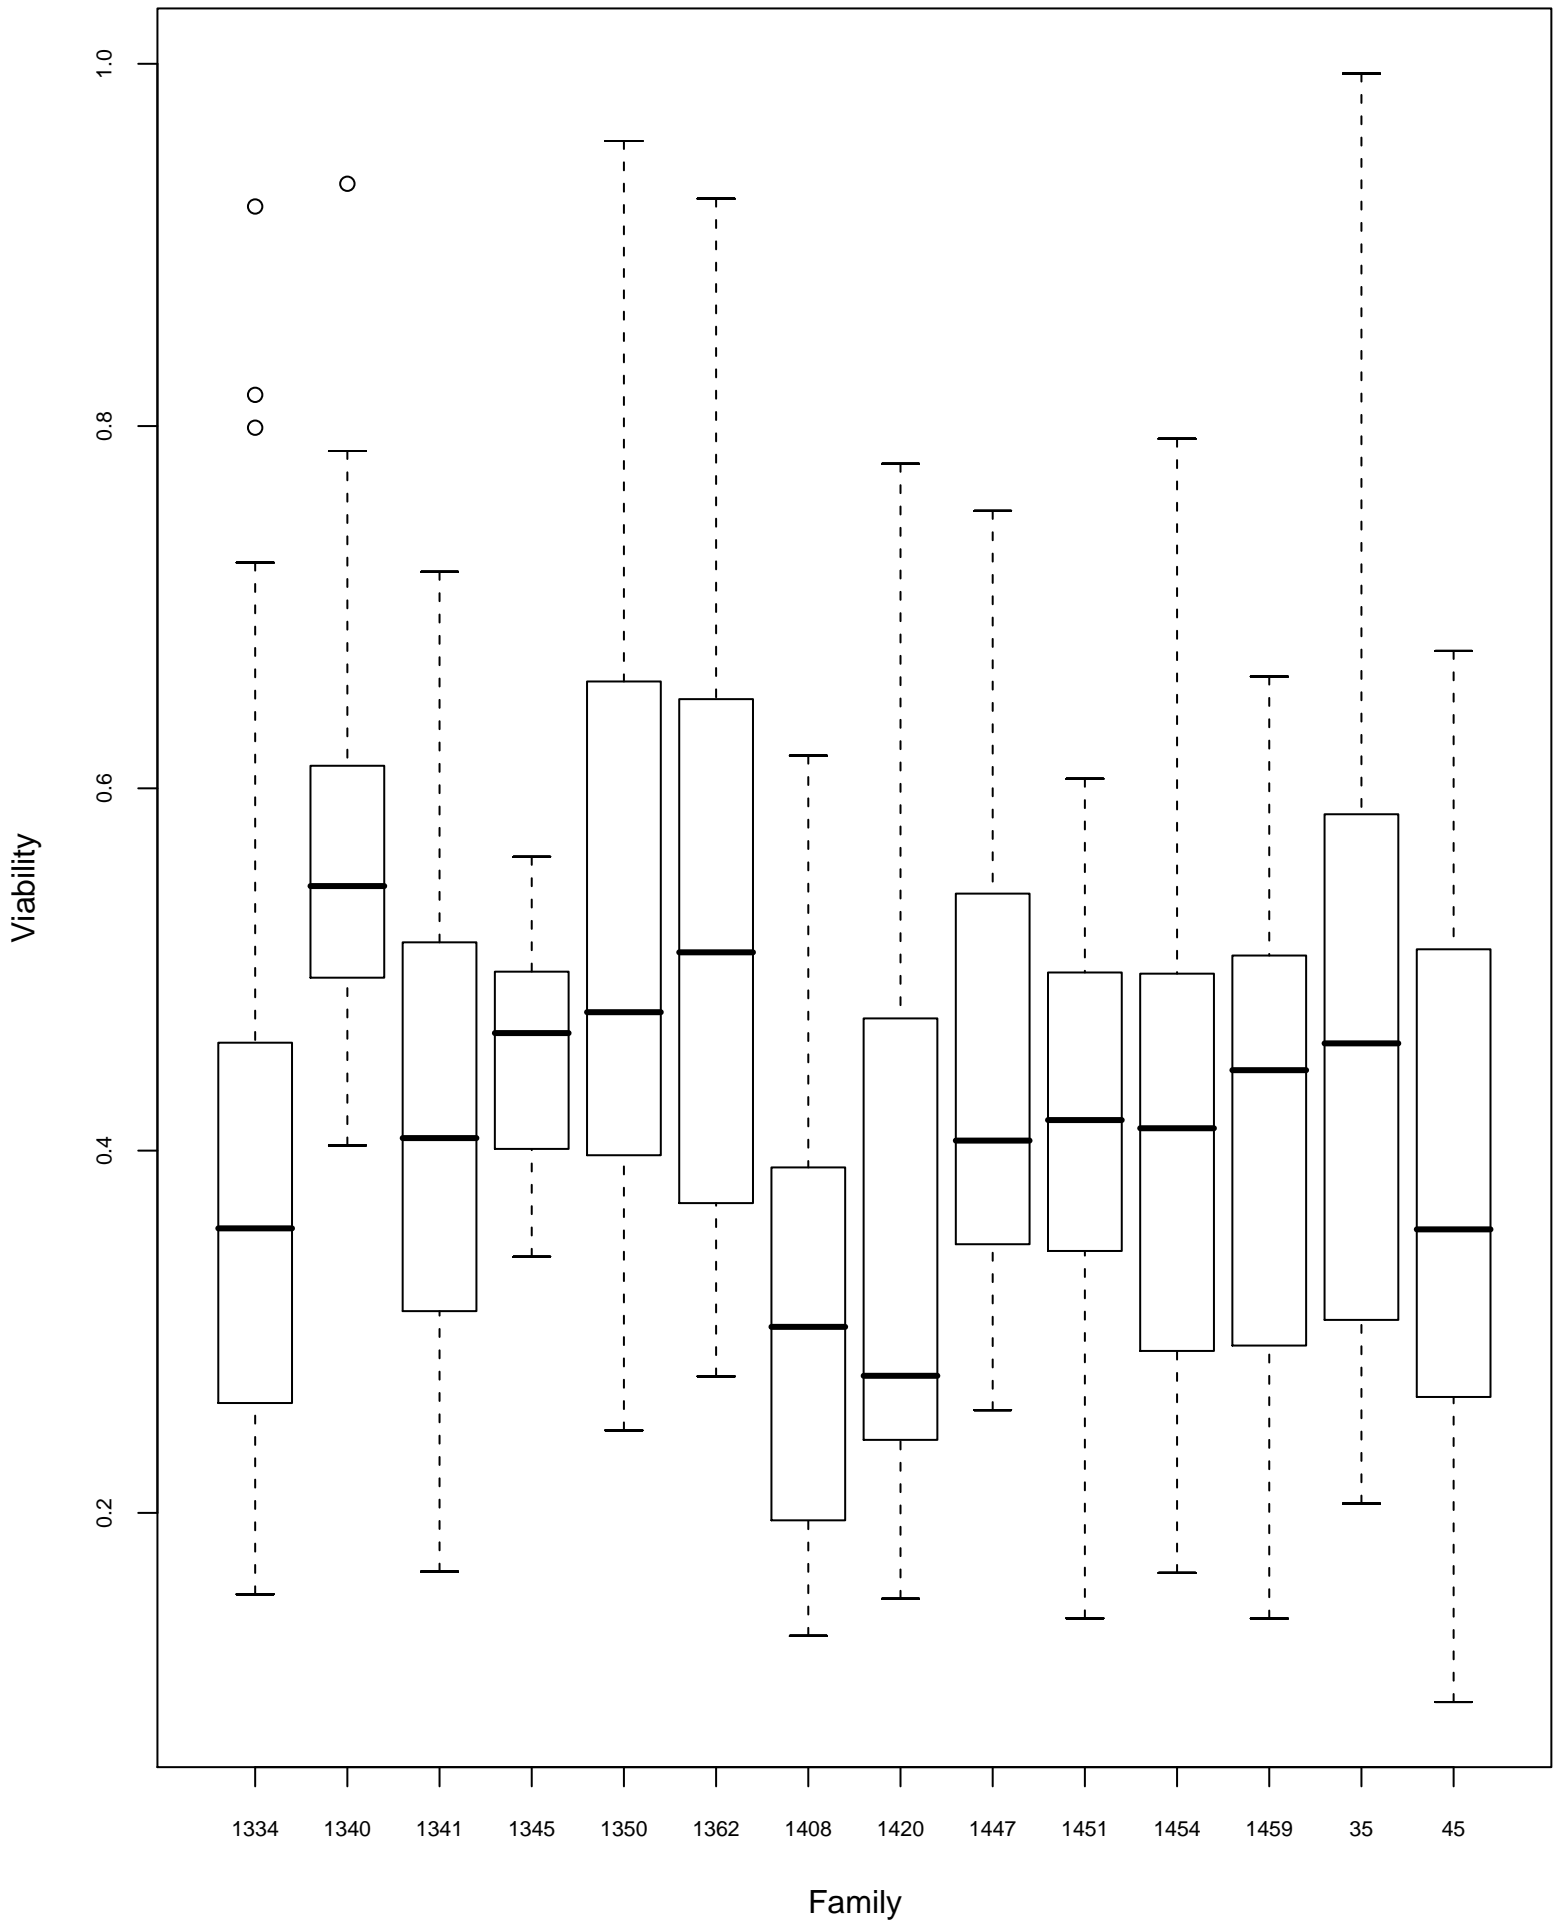

# Drug hCPT, dose 0.008 (mM)

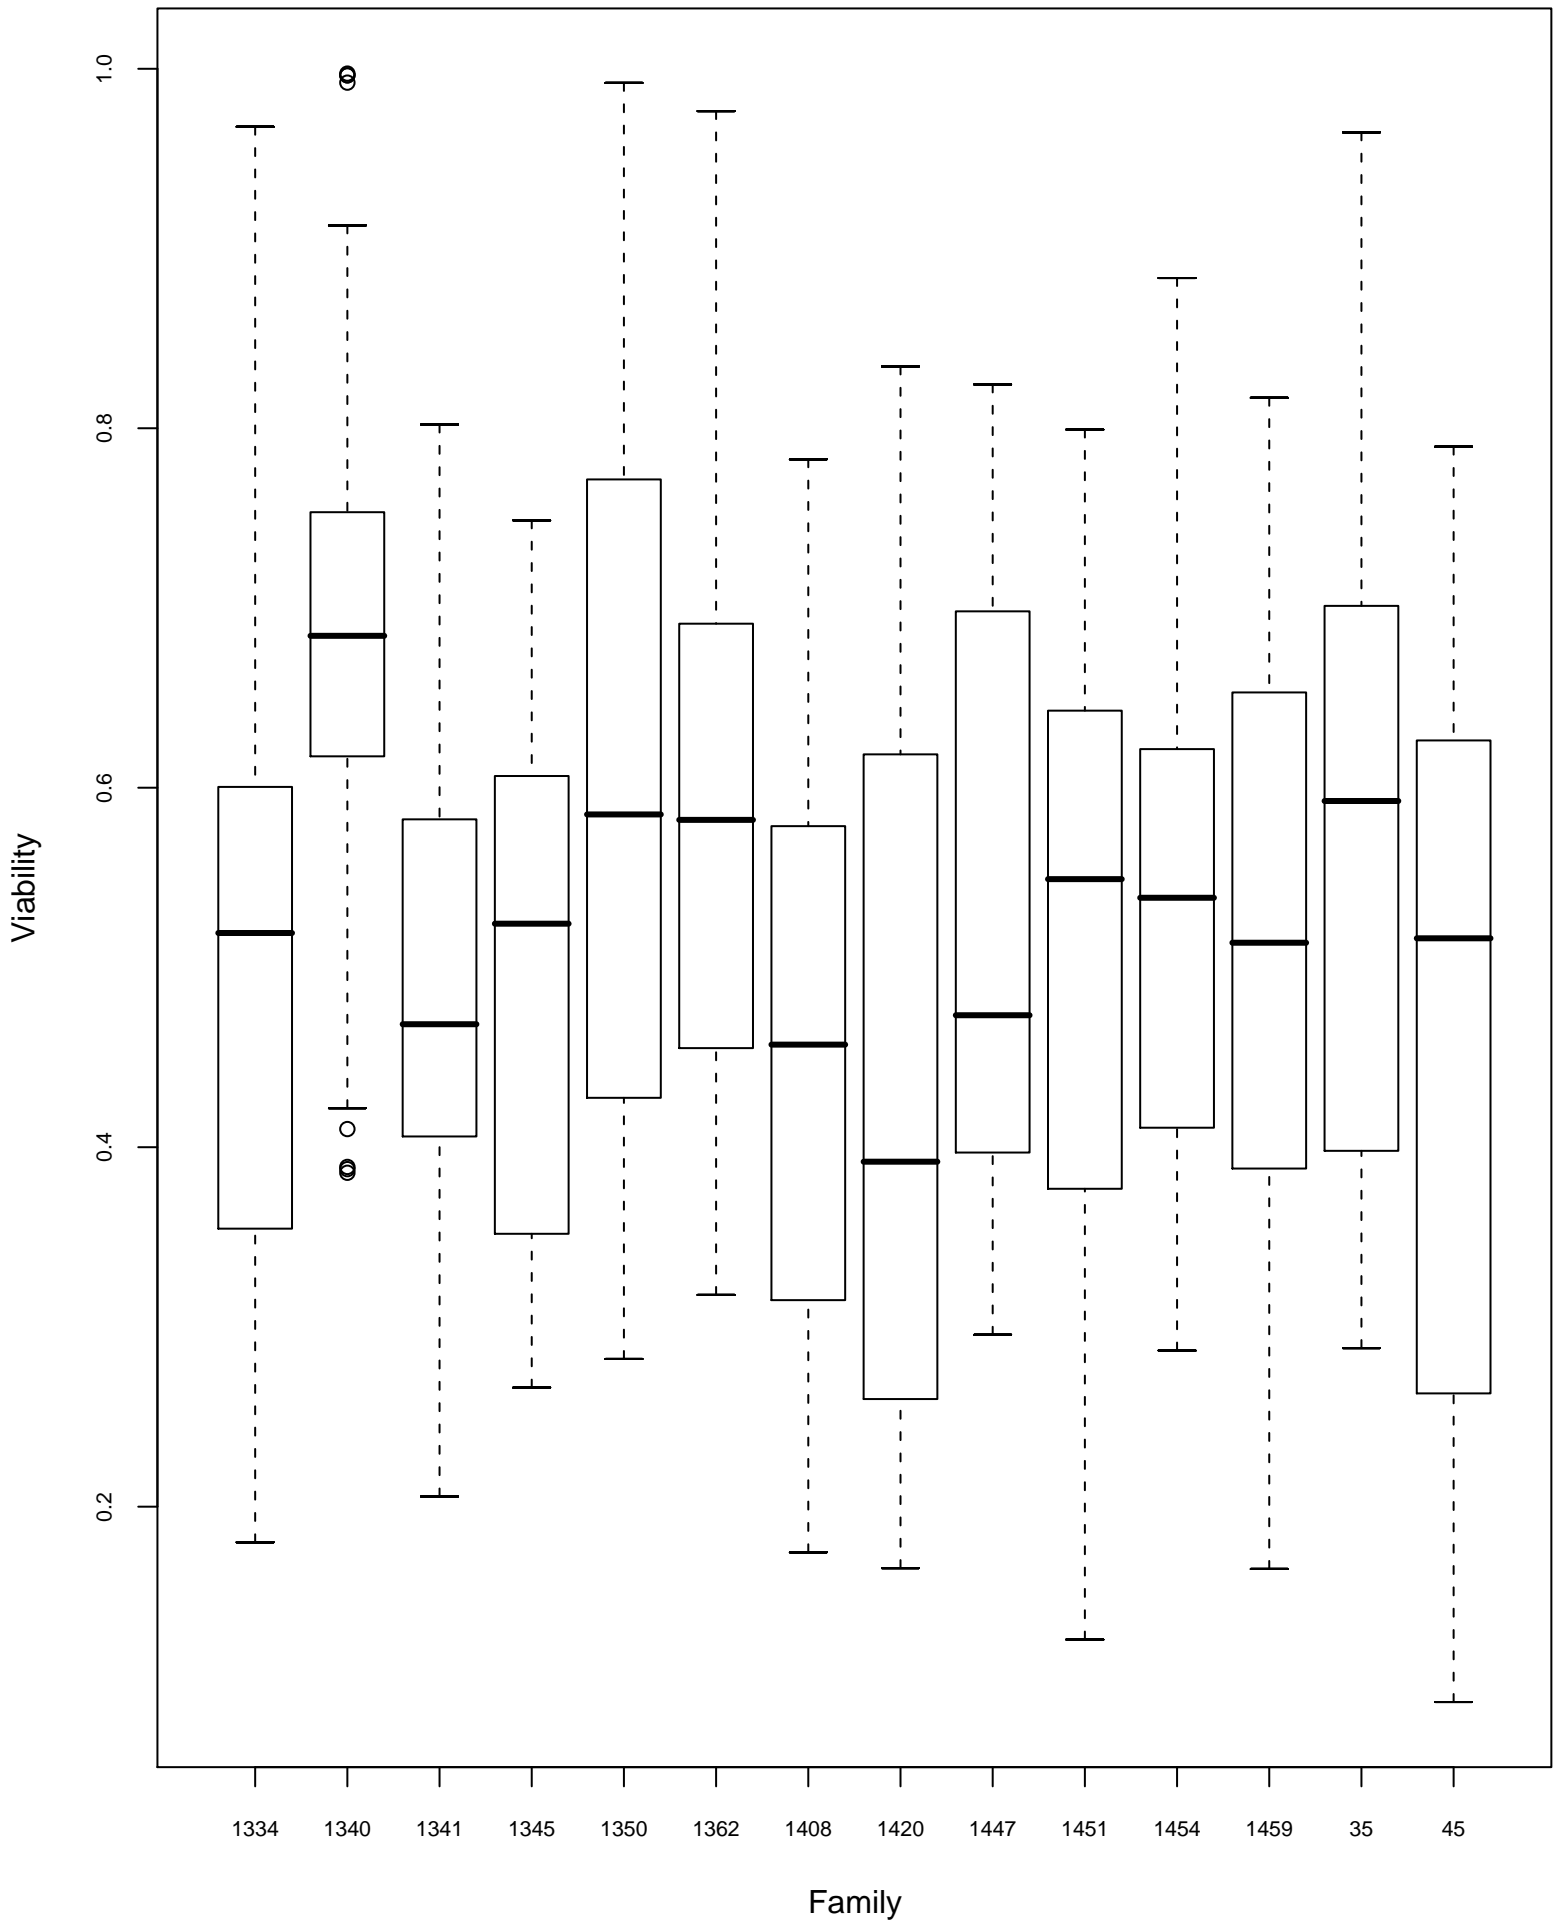

# Drug hCPT, dose 0.005 (mM)

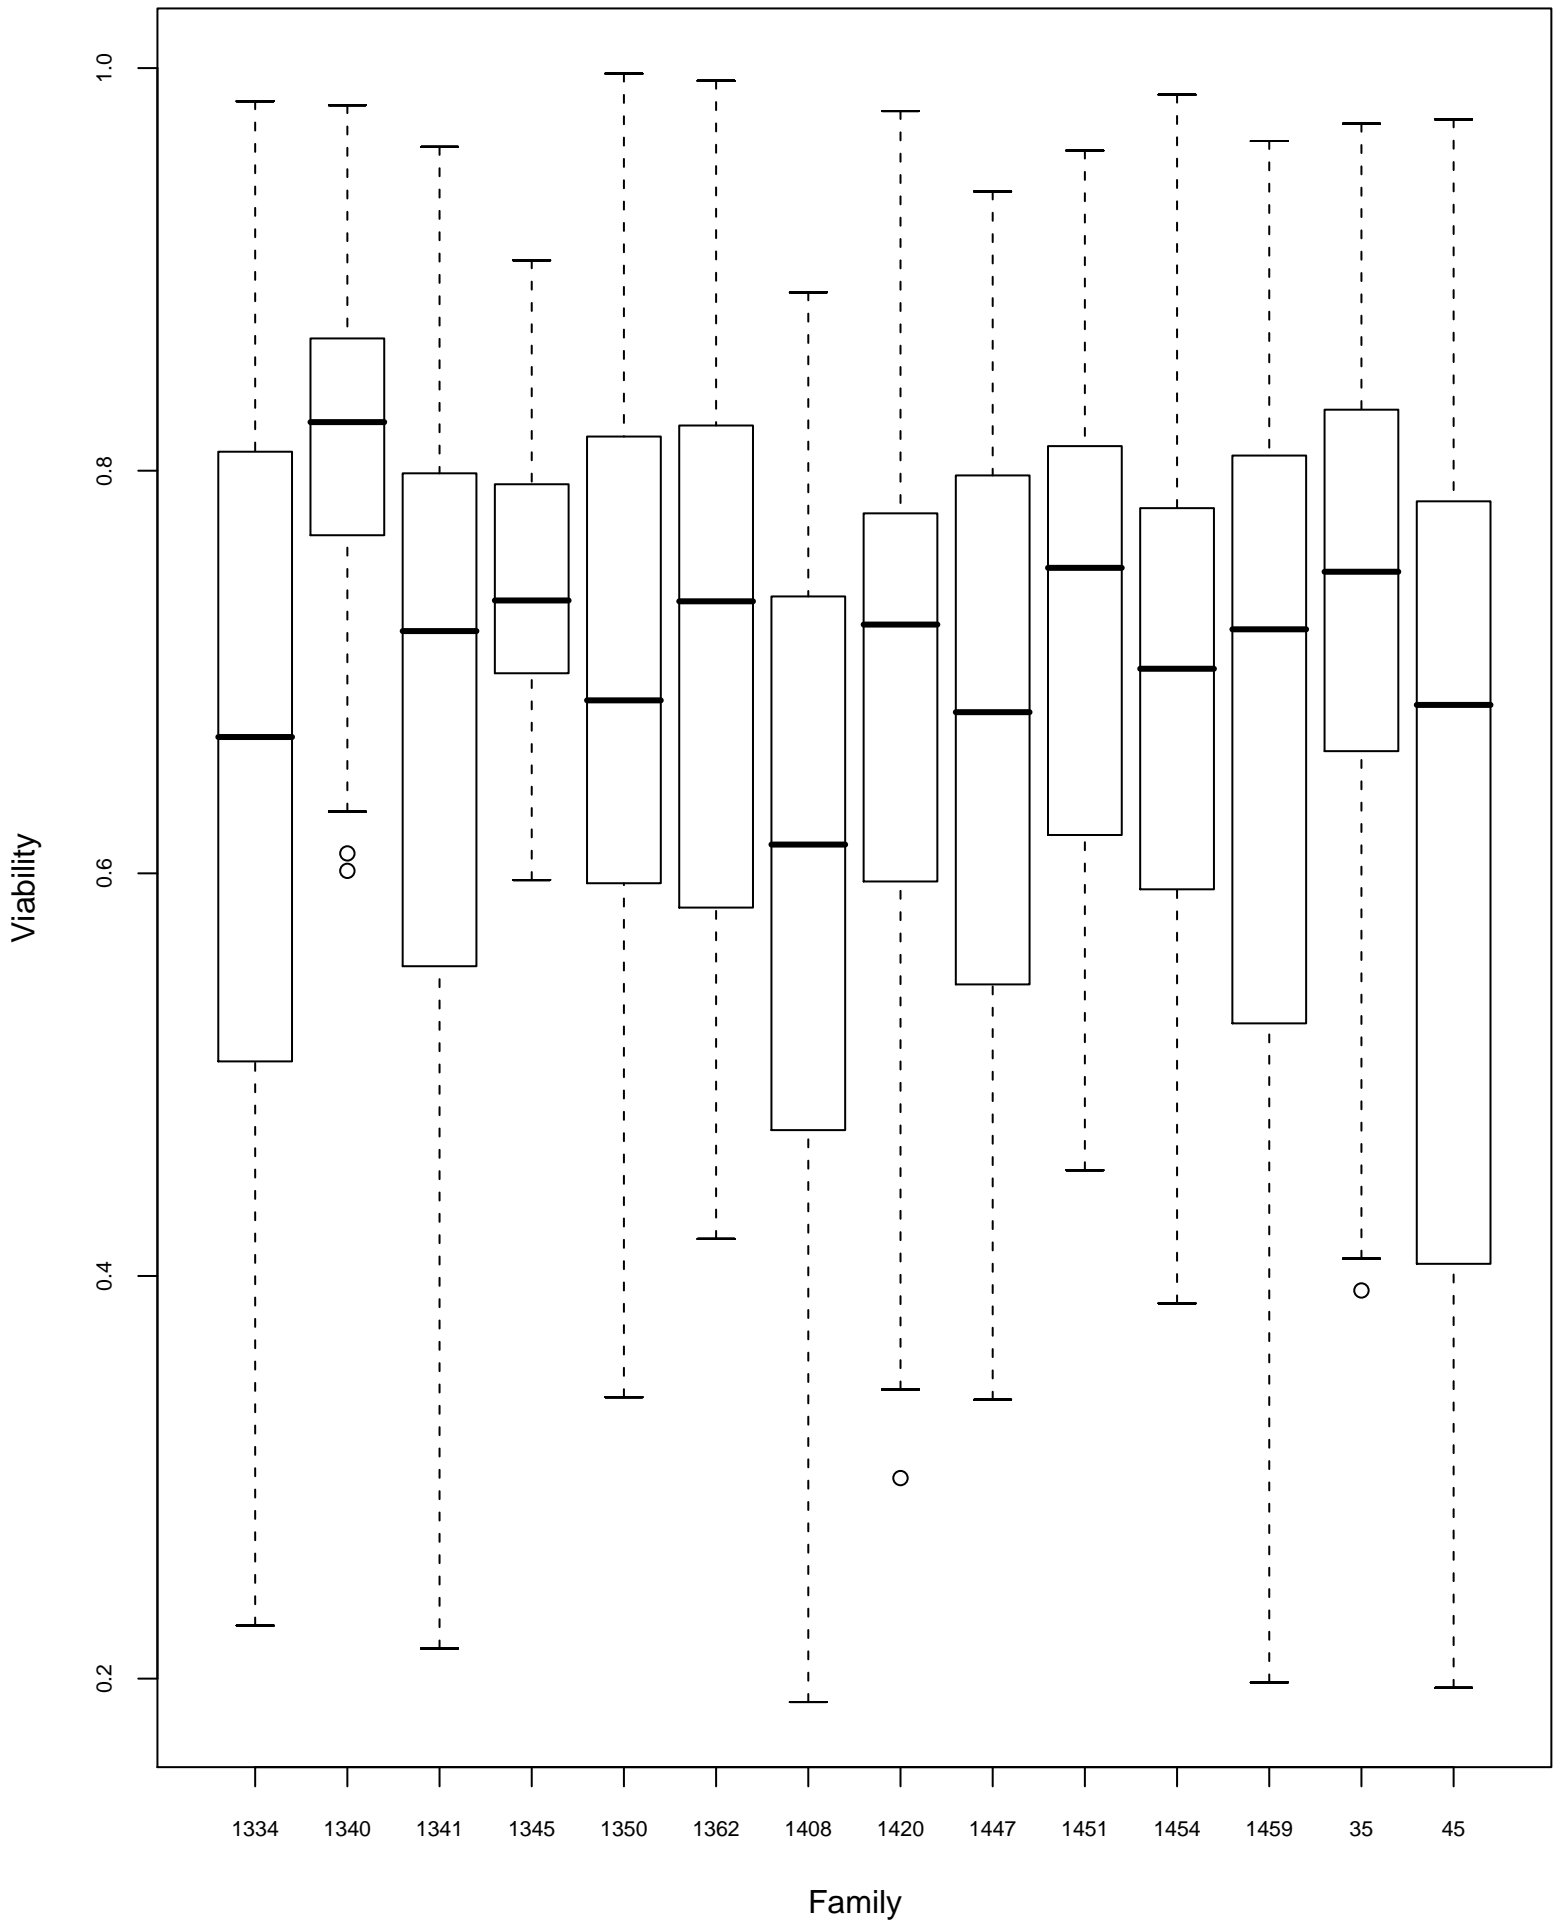



# Drug hCPT, dose 0.003 (mM)

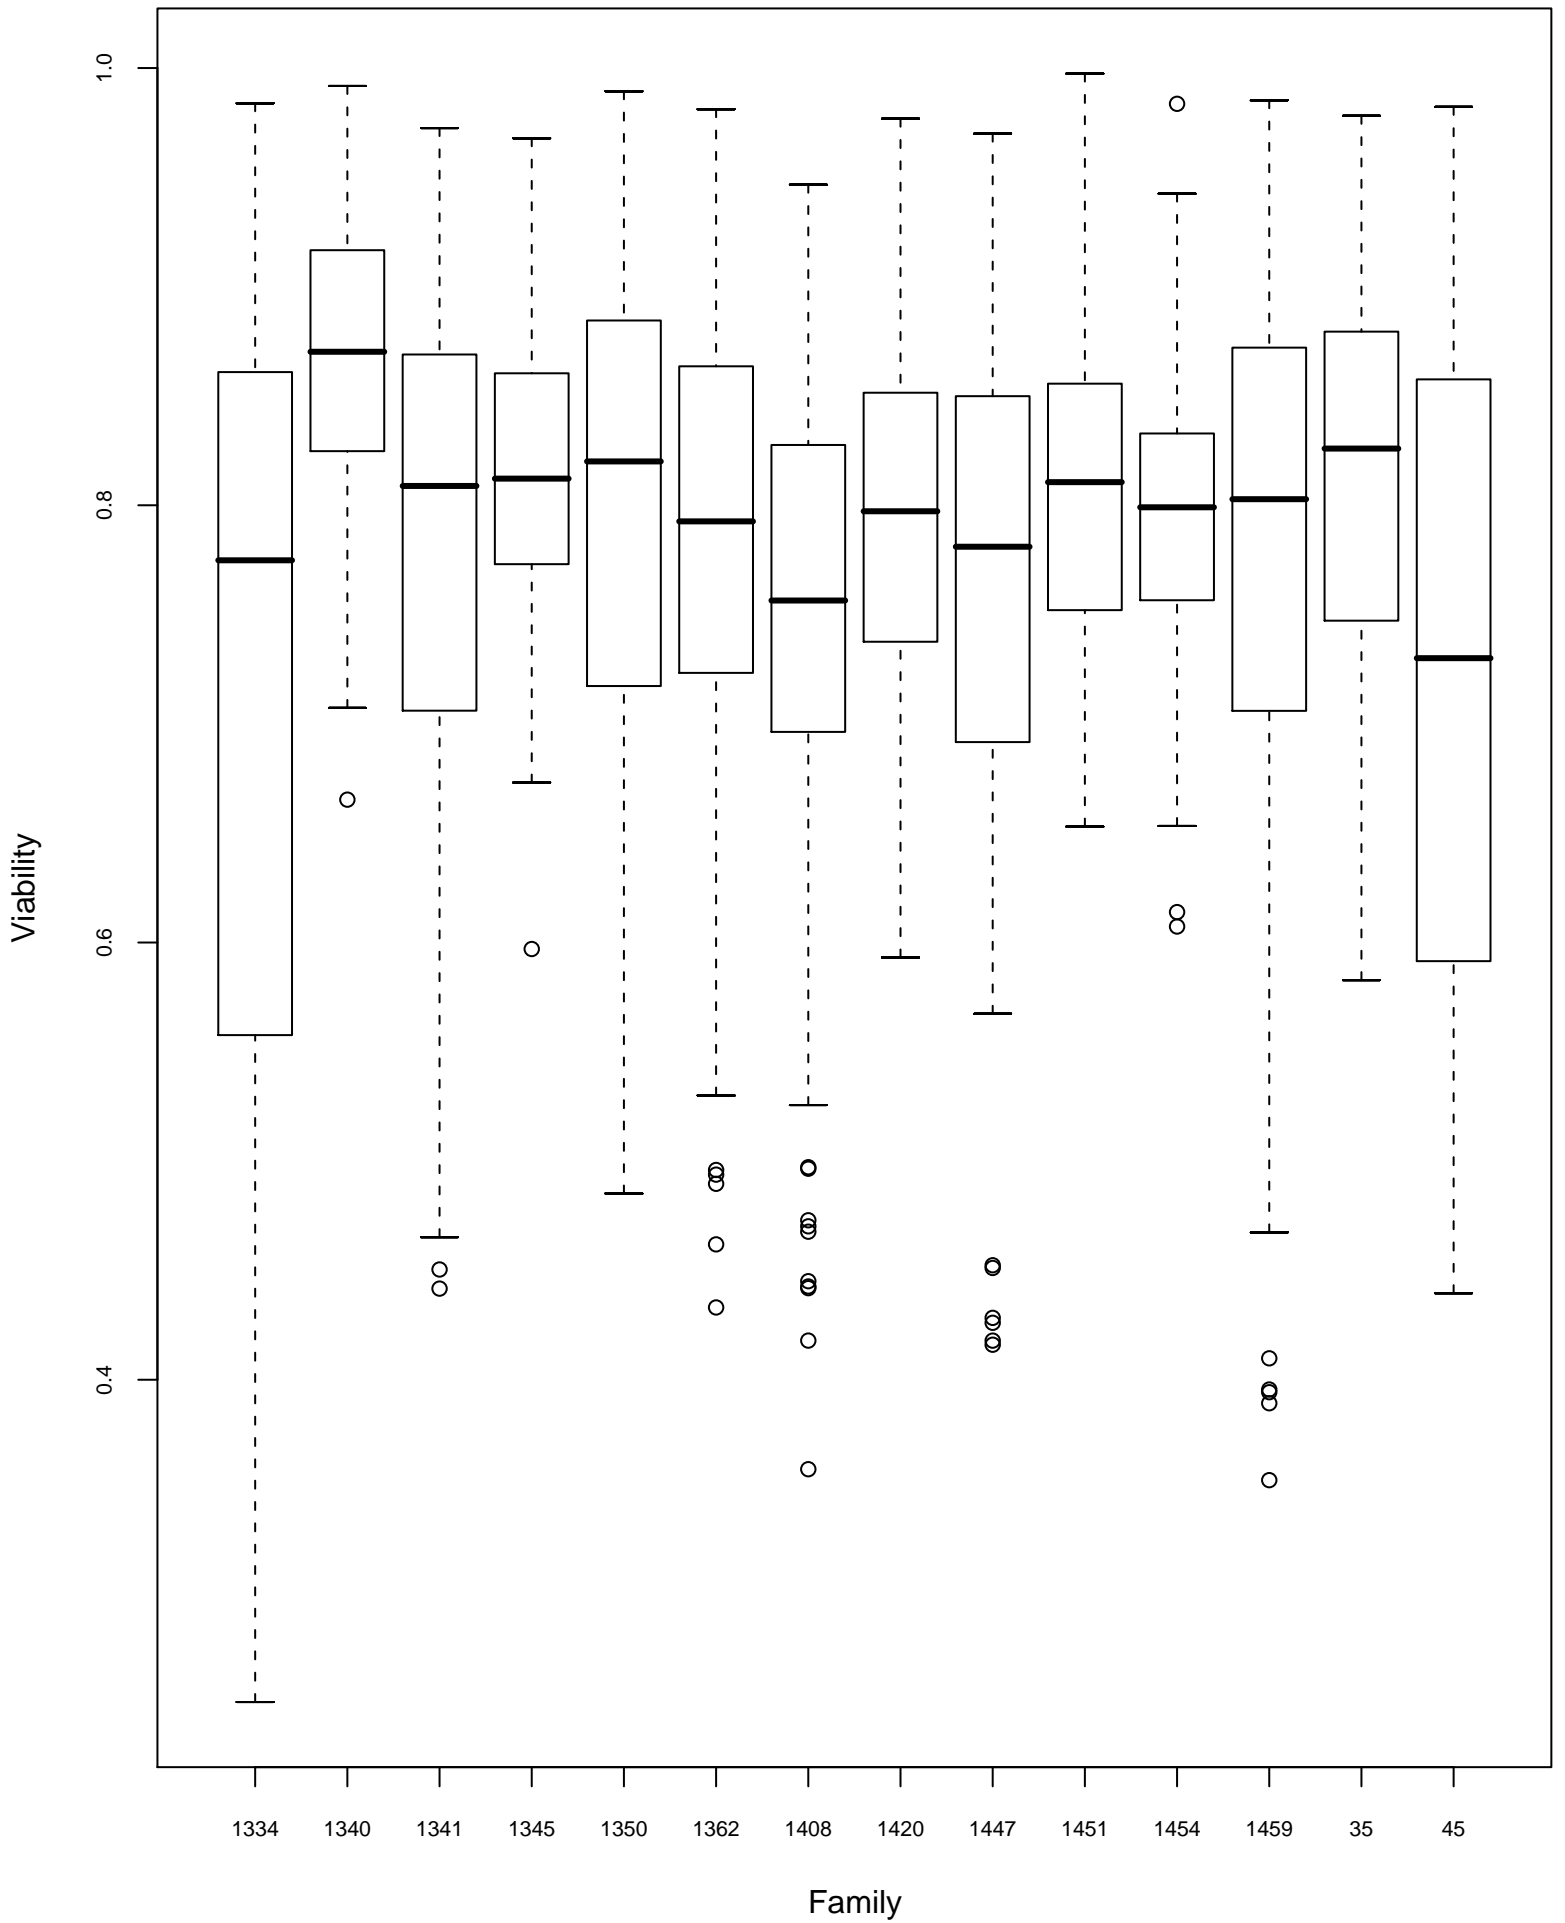

# Drug hCPT, dose 0.002 (mM)

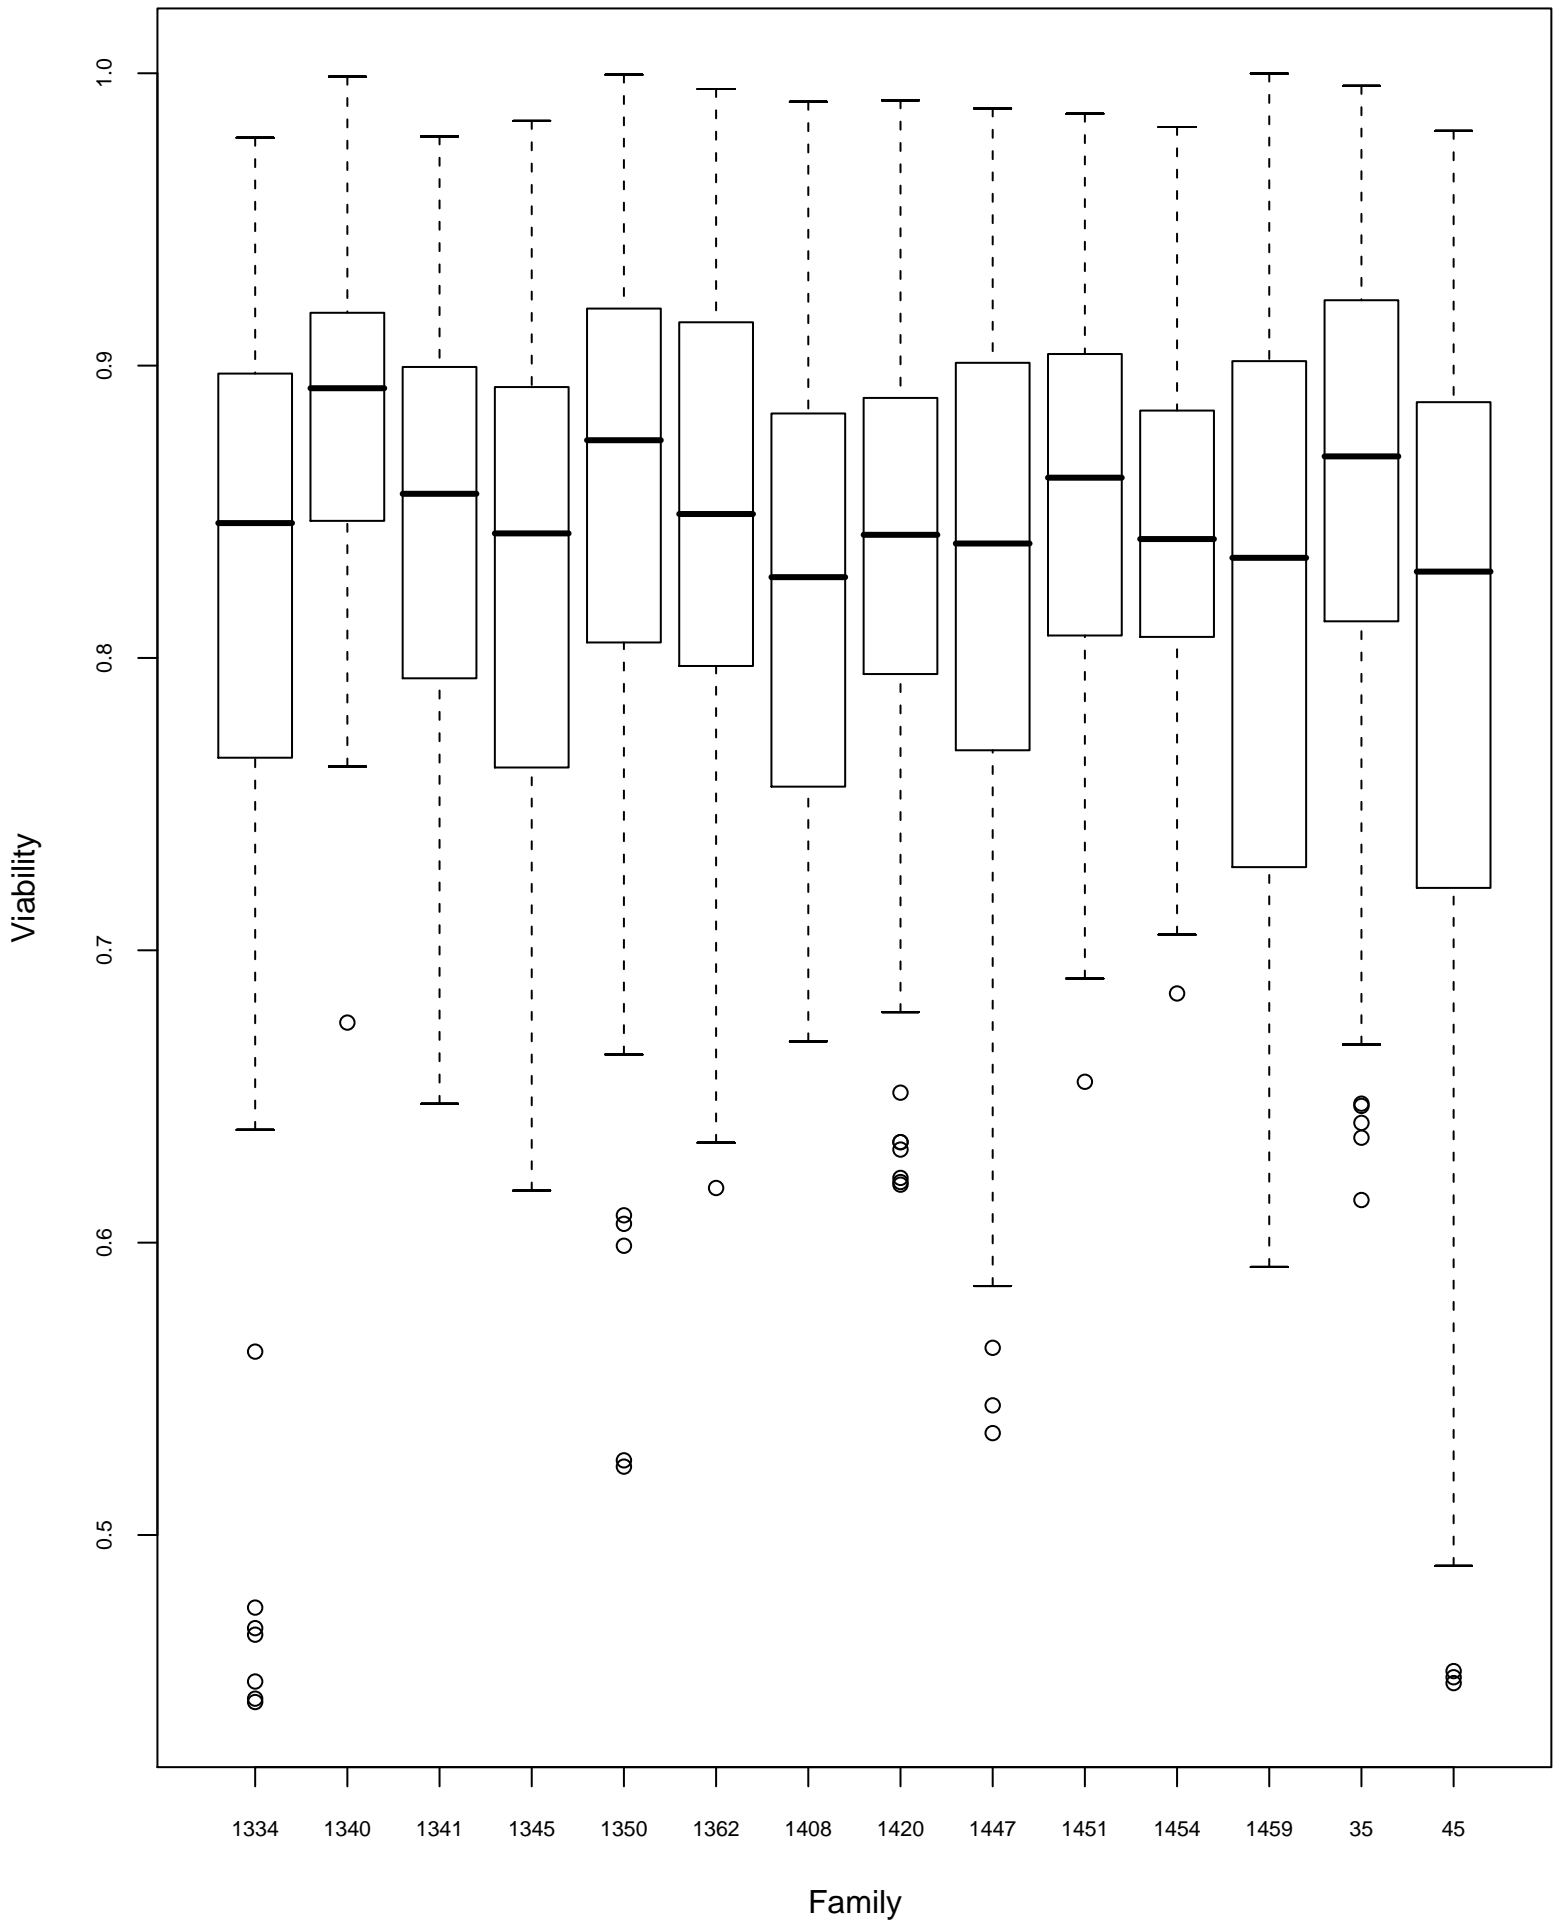

# Drug hCPT, dose 0.001 (mM)

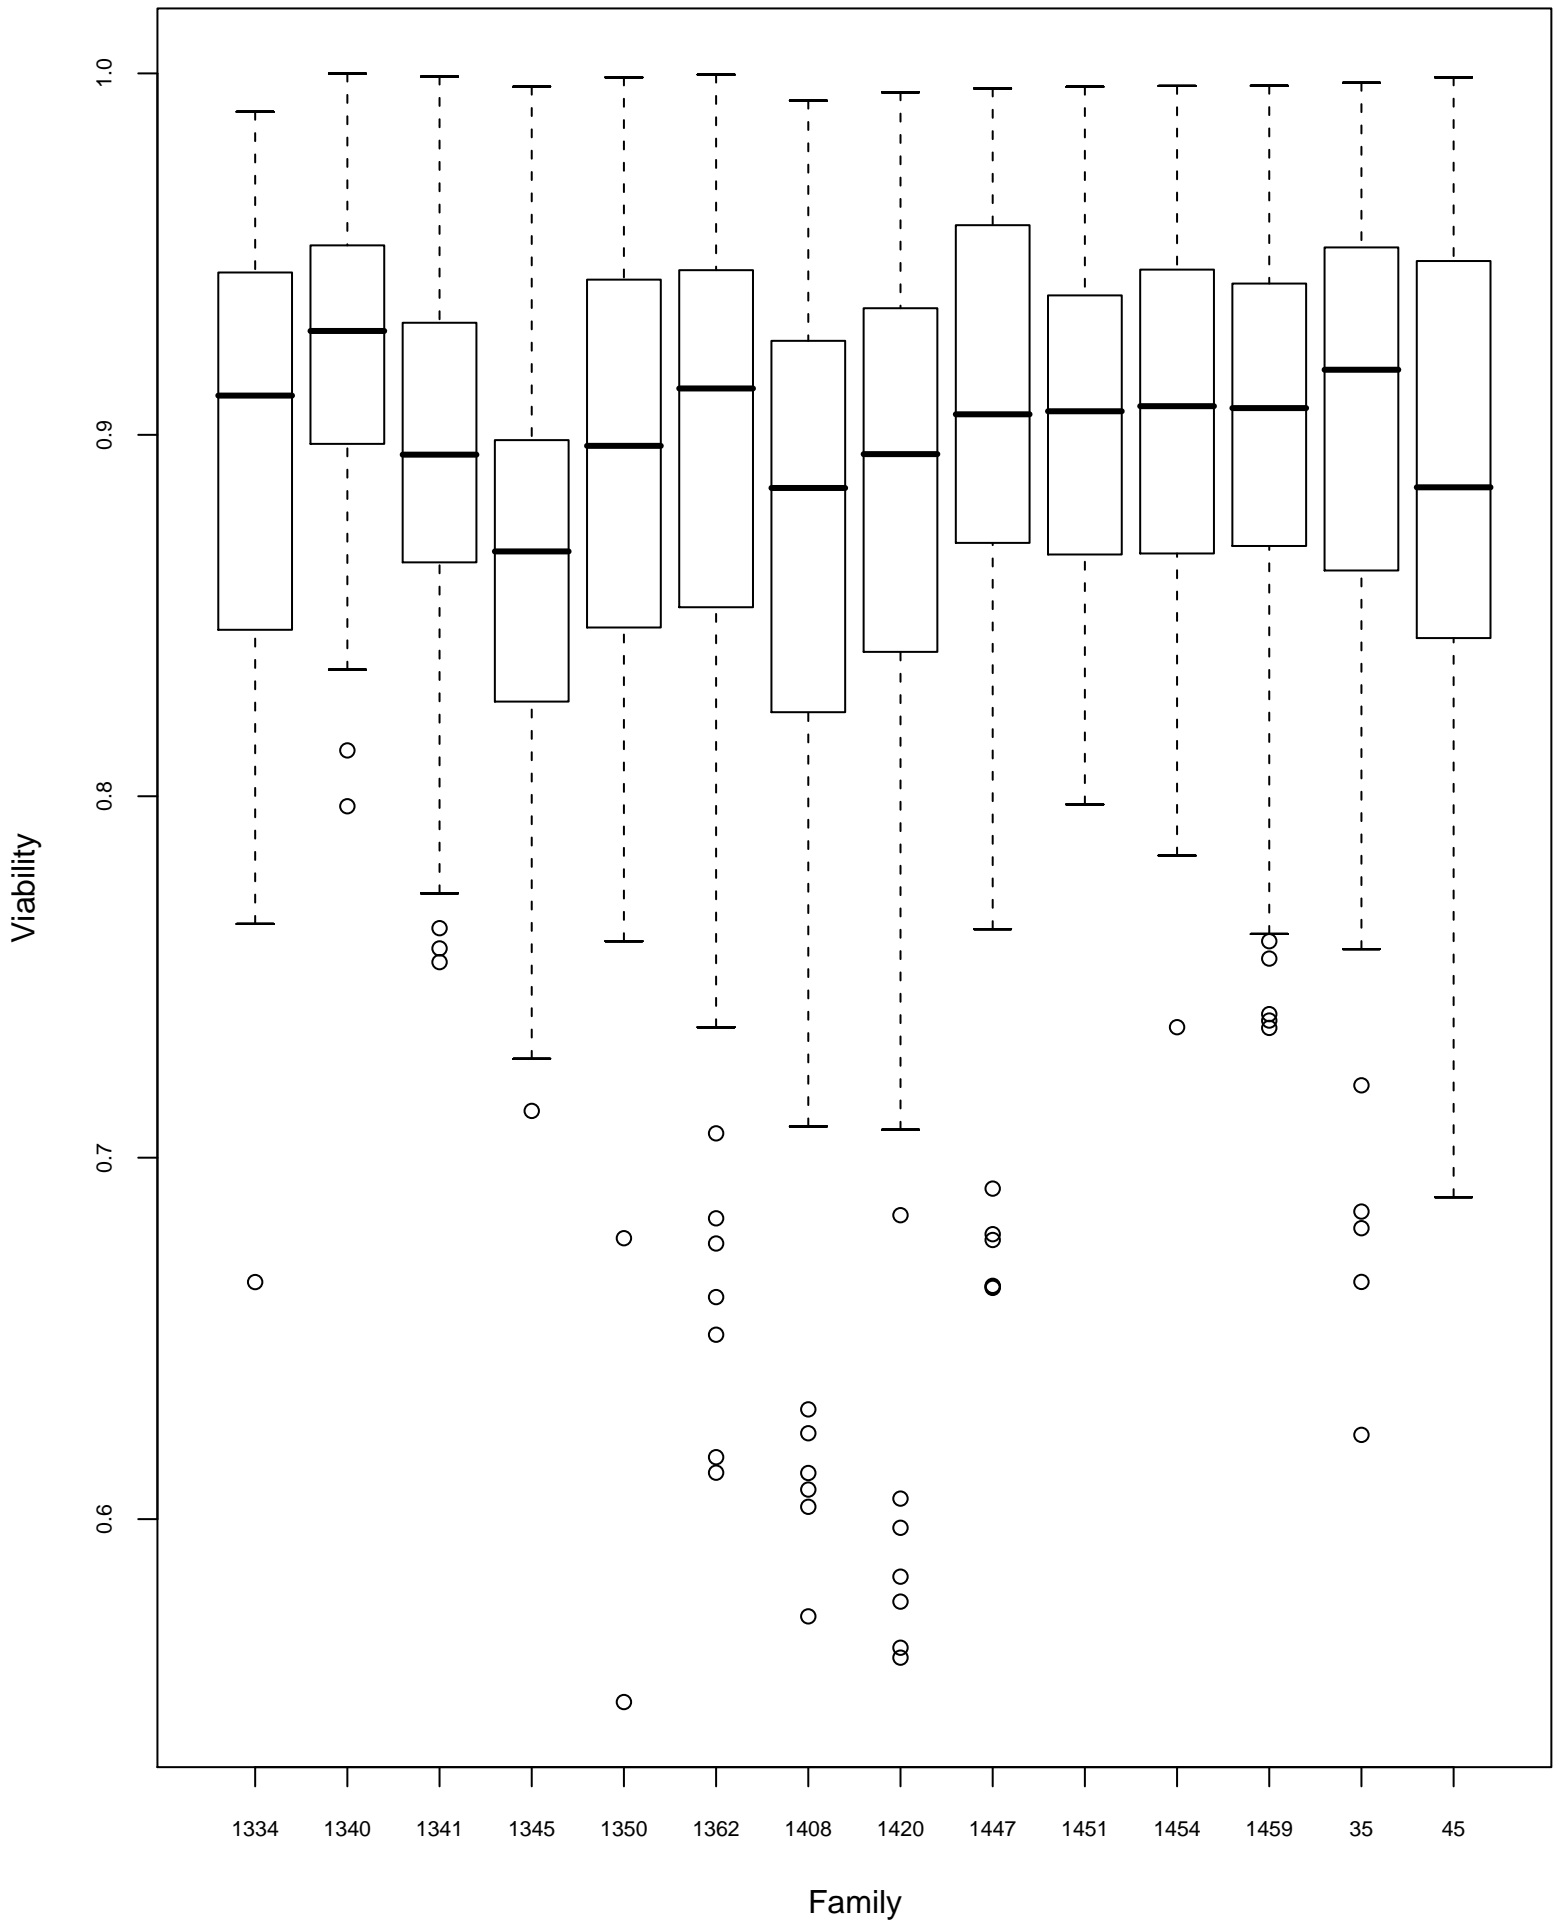

# Drug hCPT, dose 0.0001 (mM)

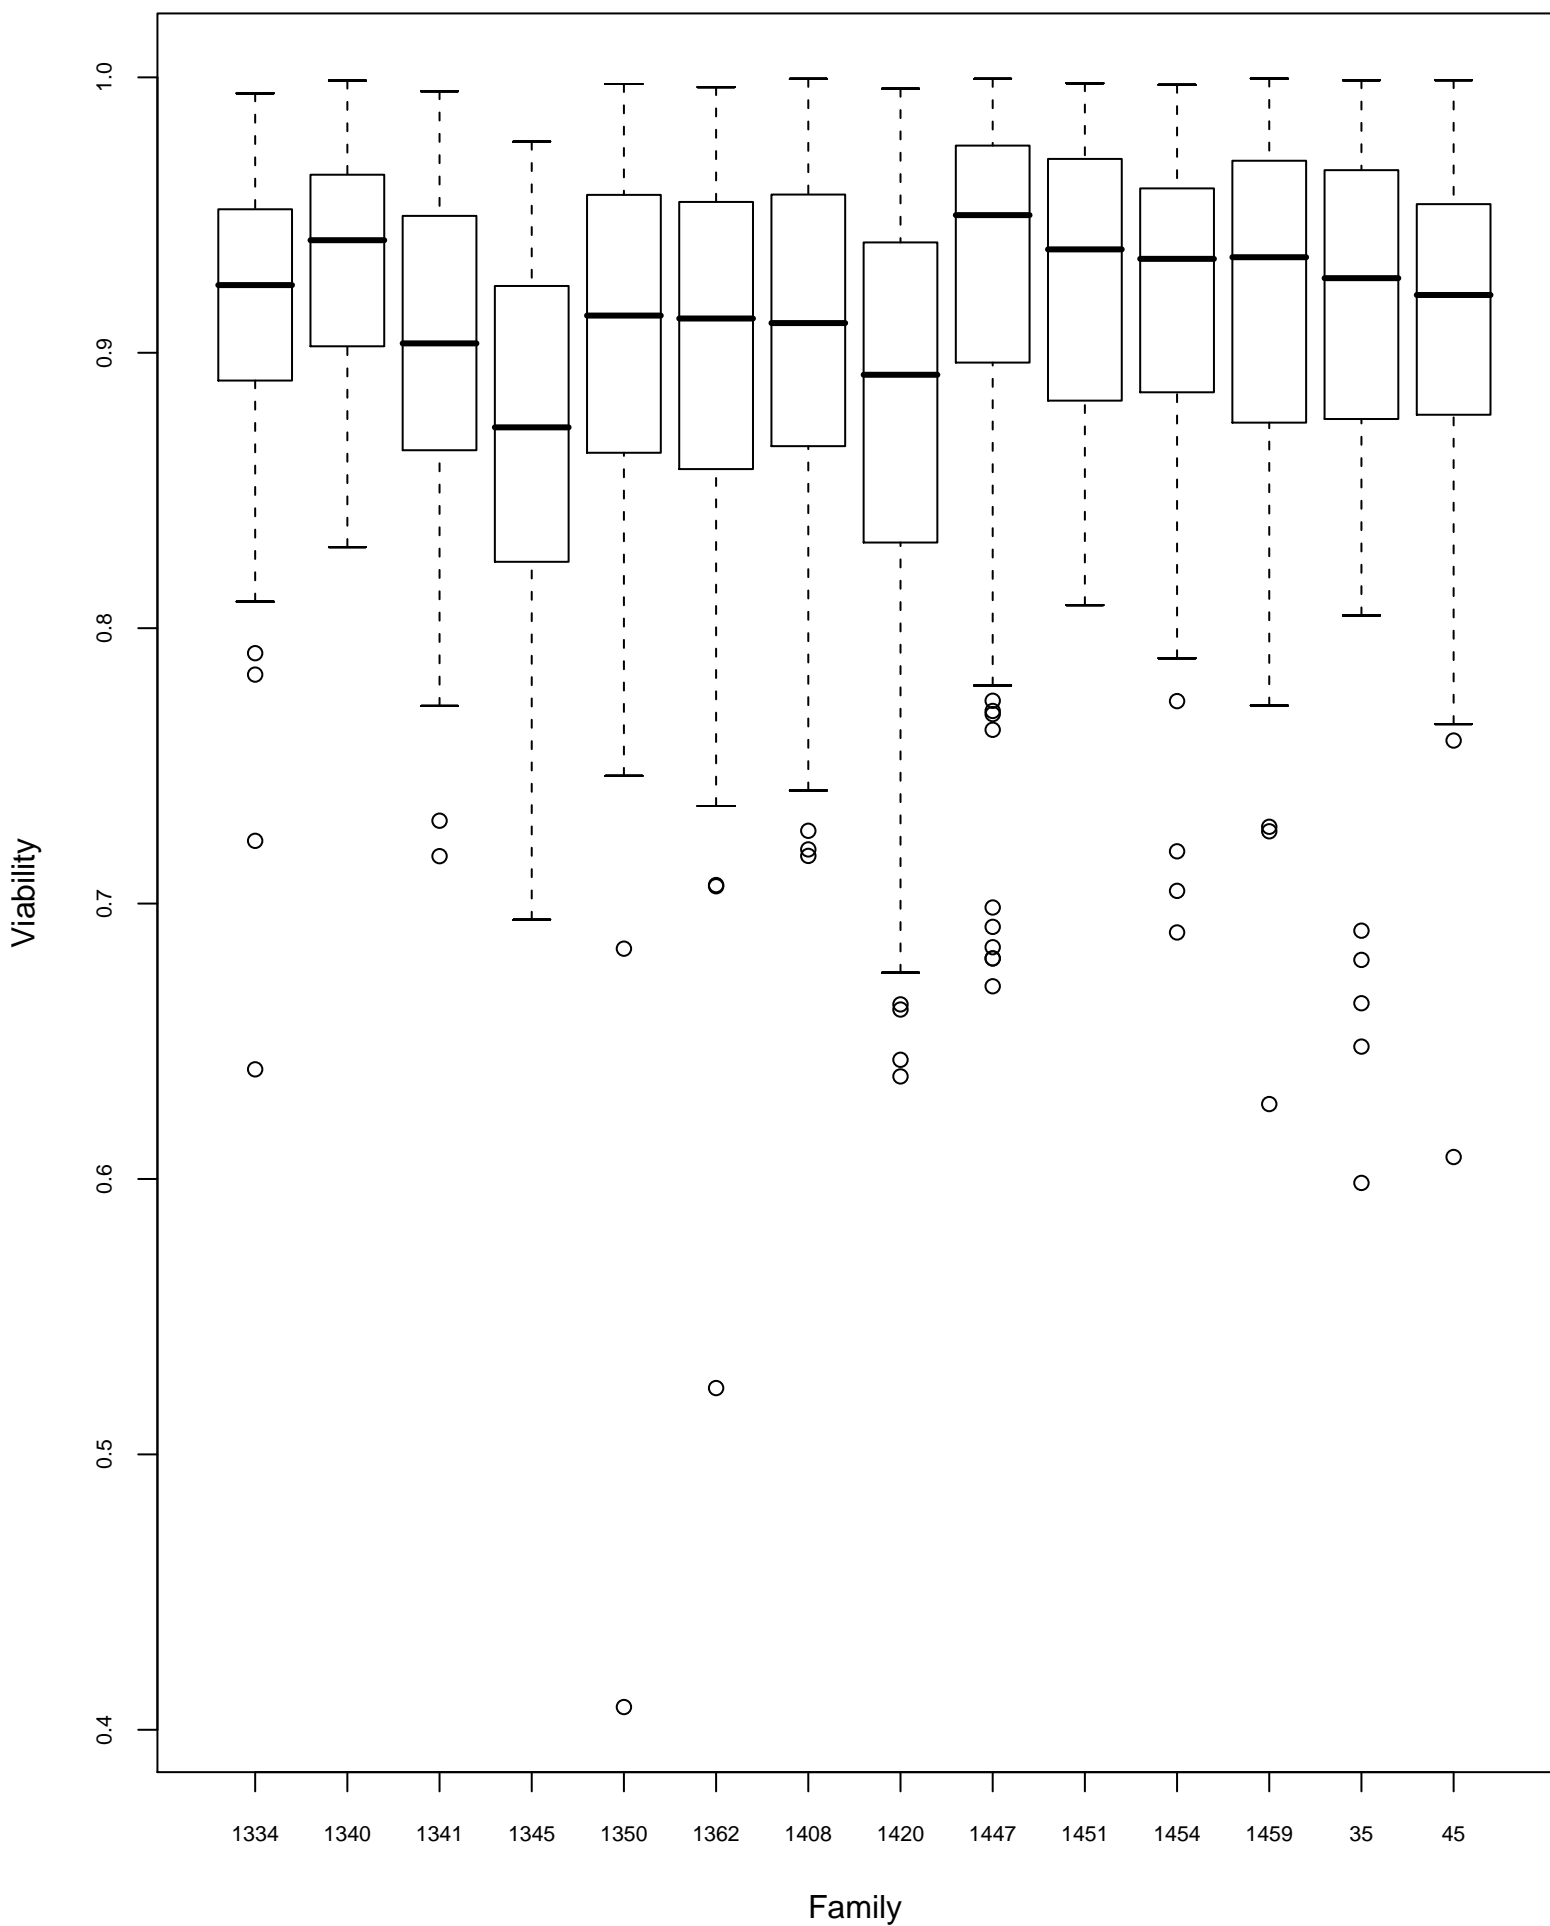



# Drug mCPT, dose 2 (mM)

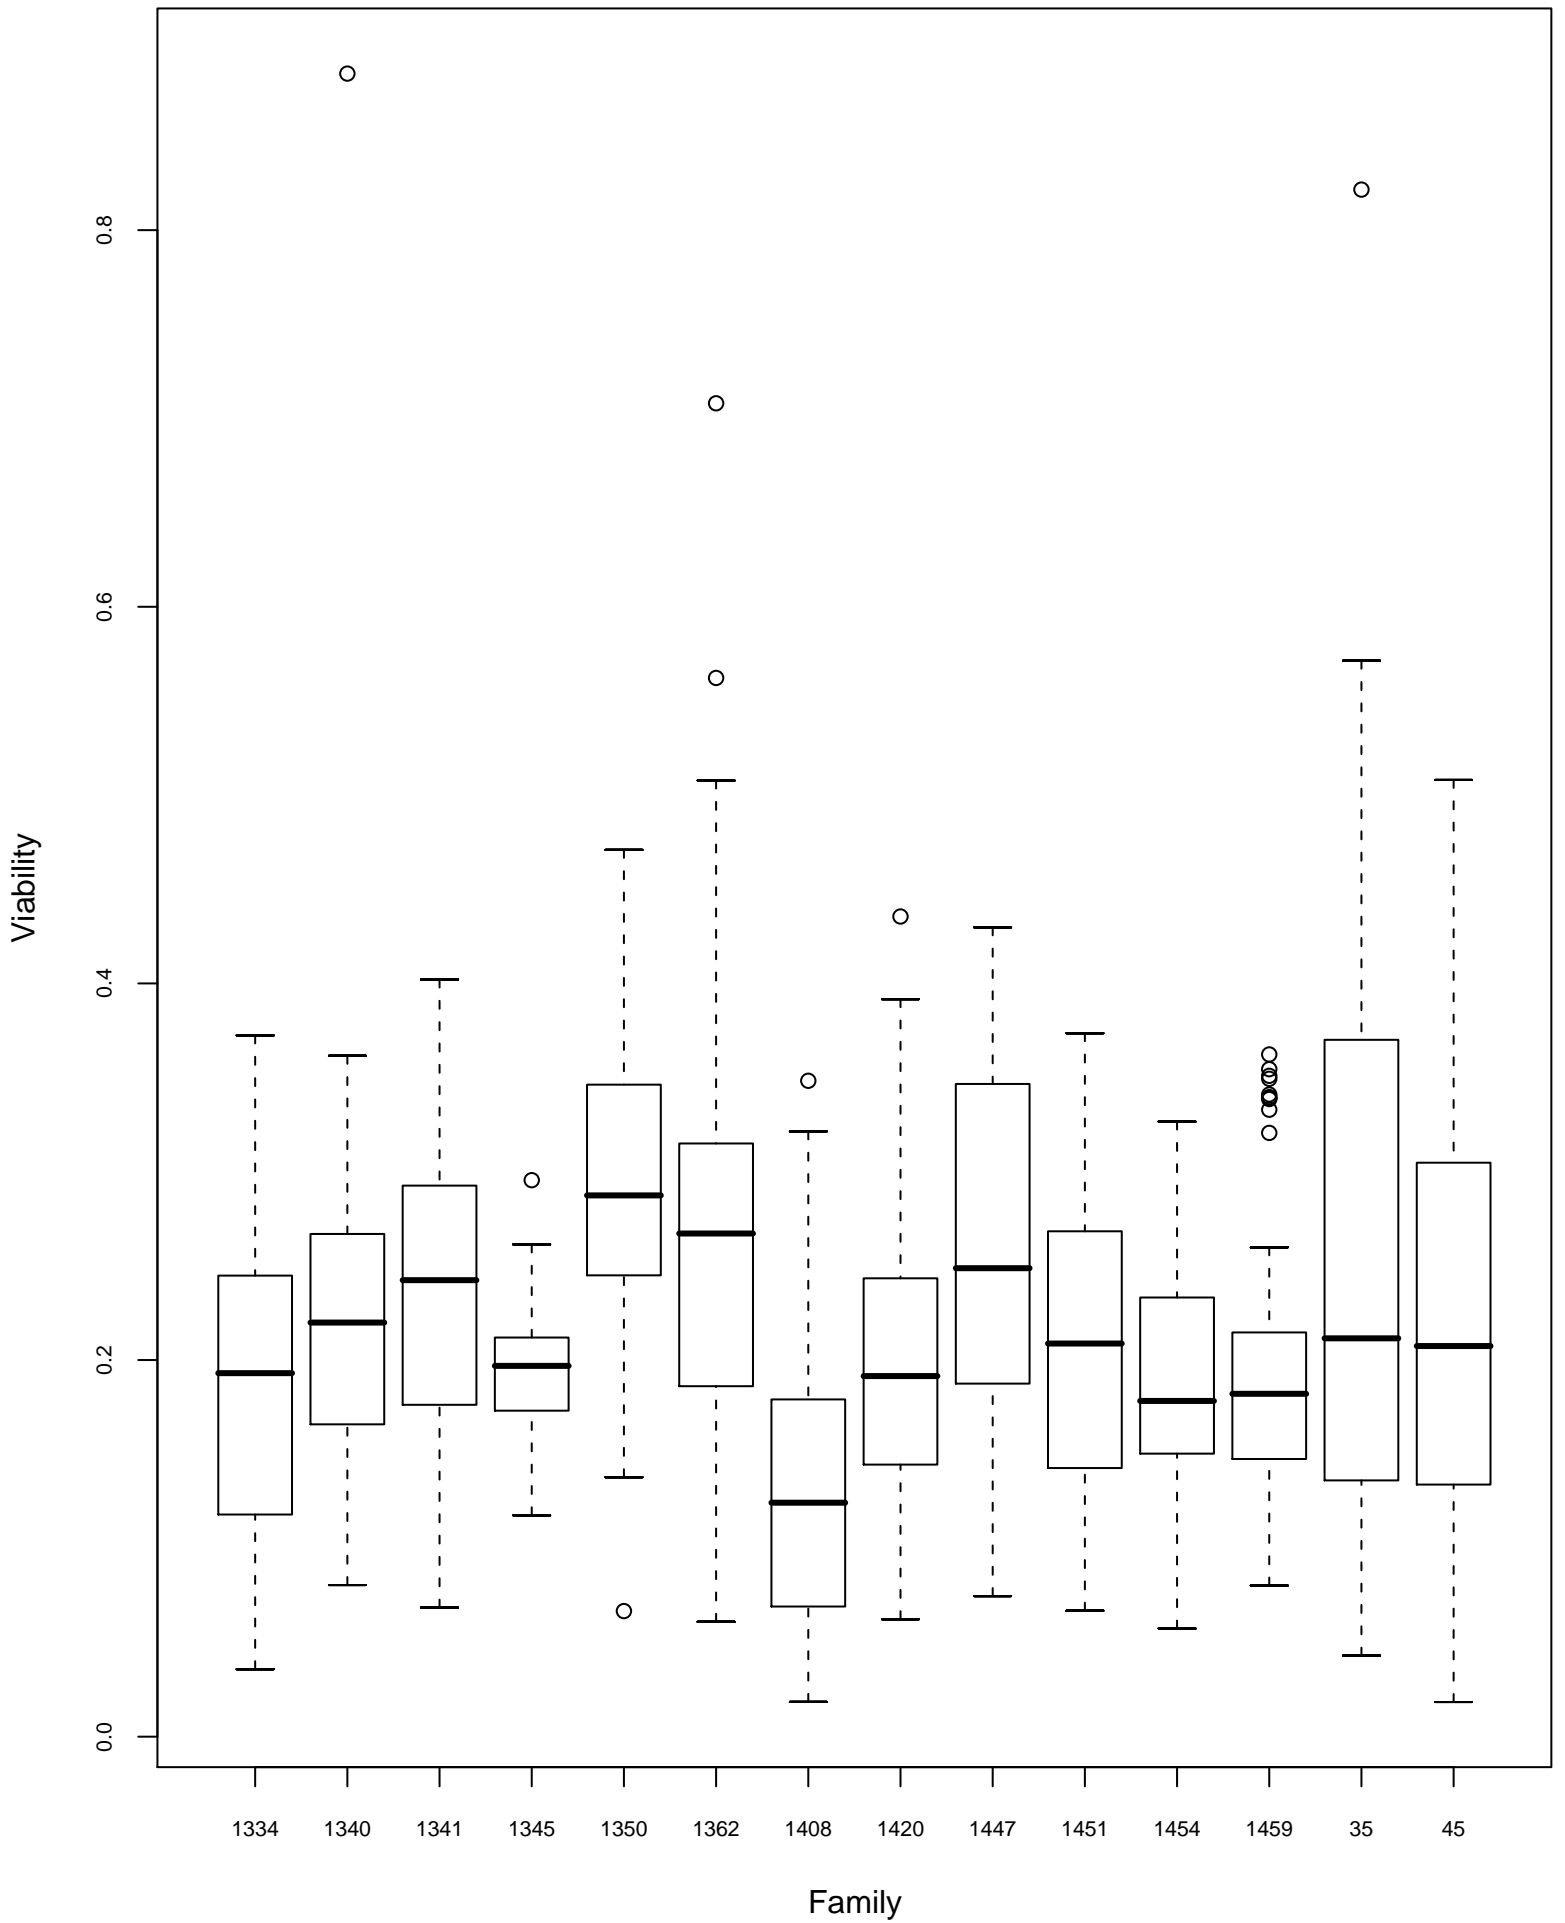

# Drug mCPT, dose 0.08 (mM)

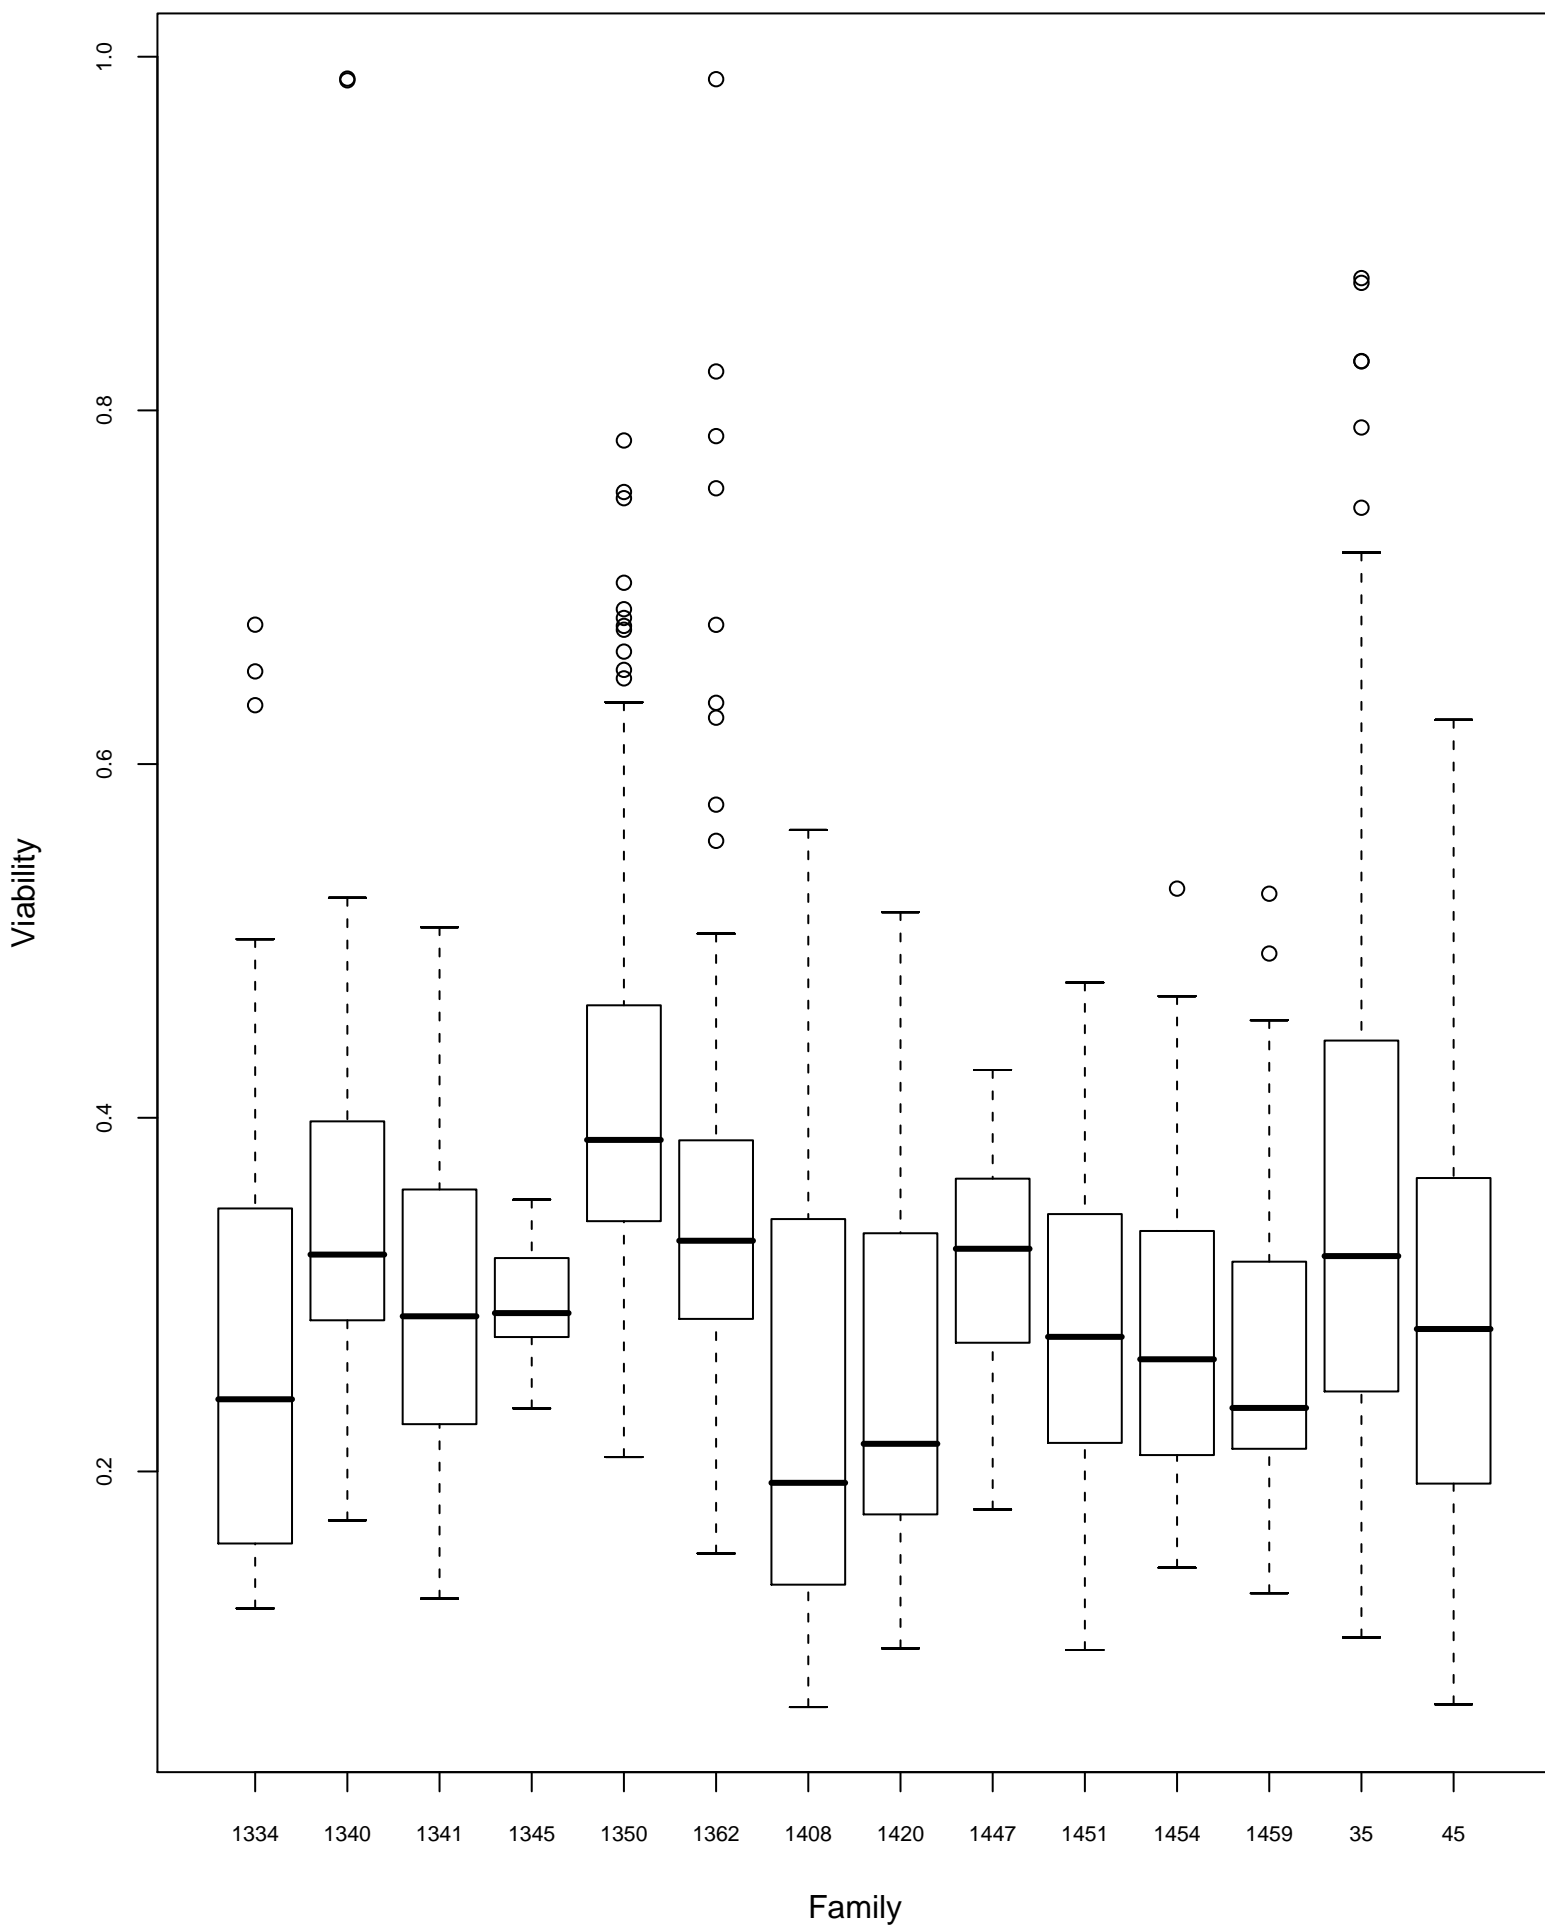

# Drug mCPT, dose 0.025 (mM)

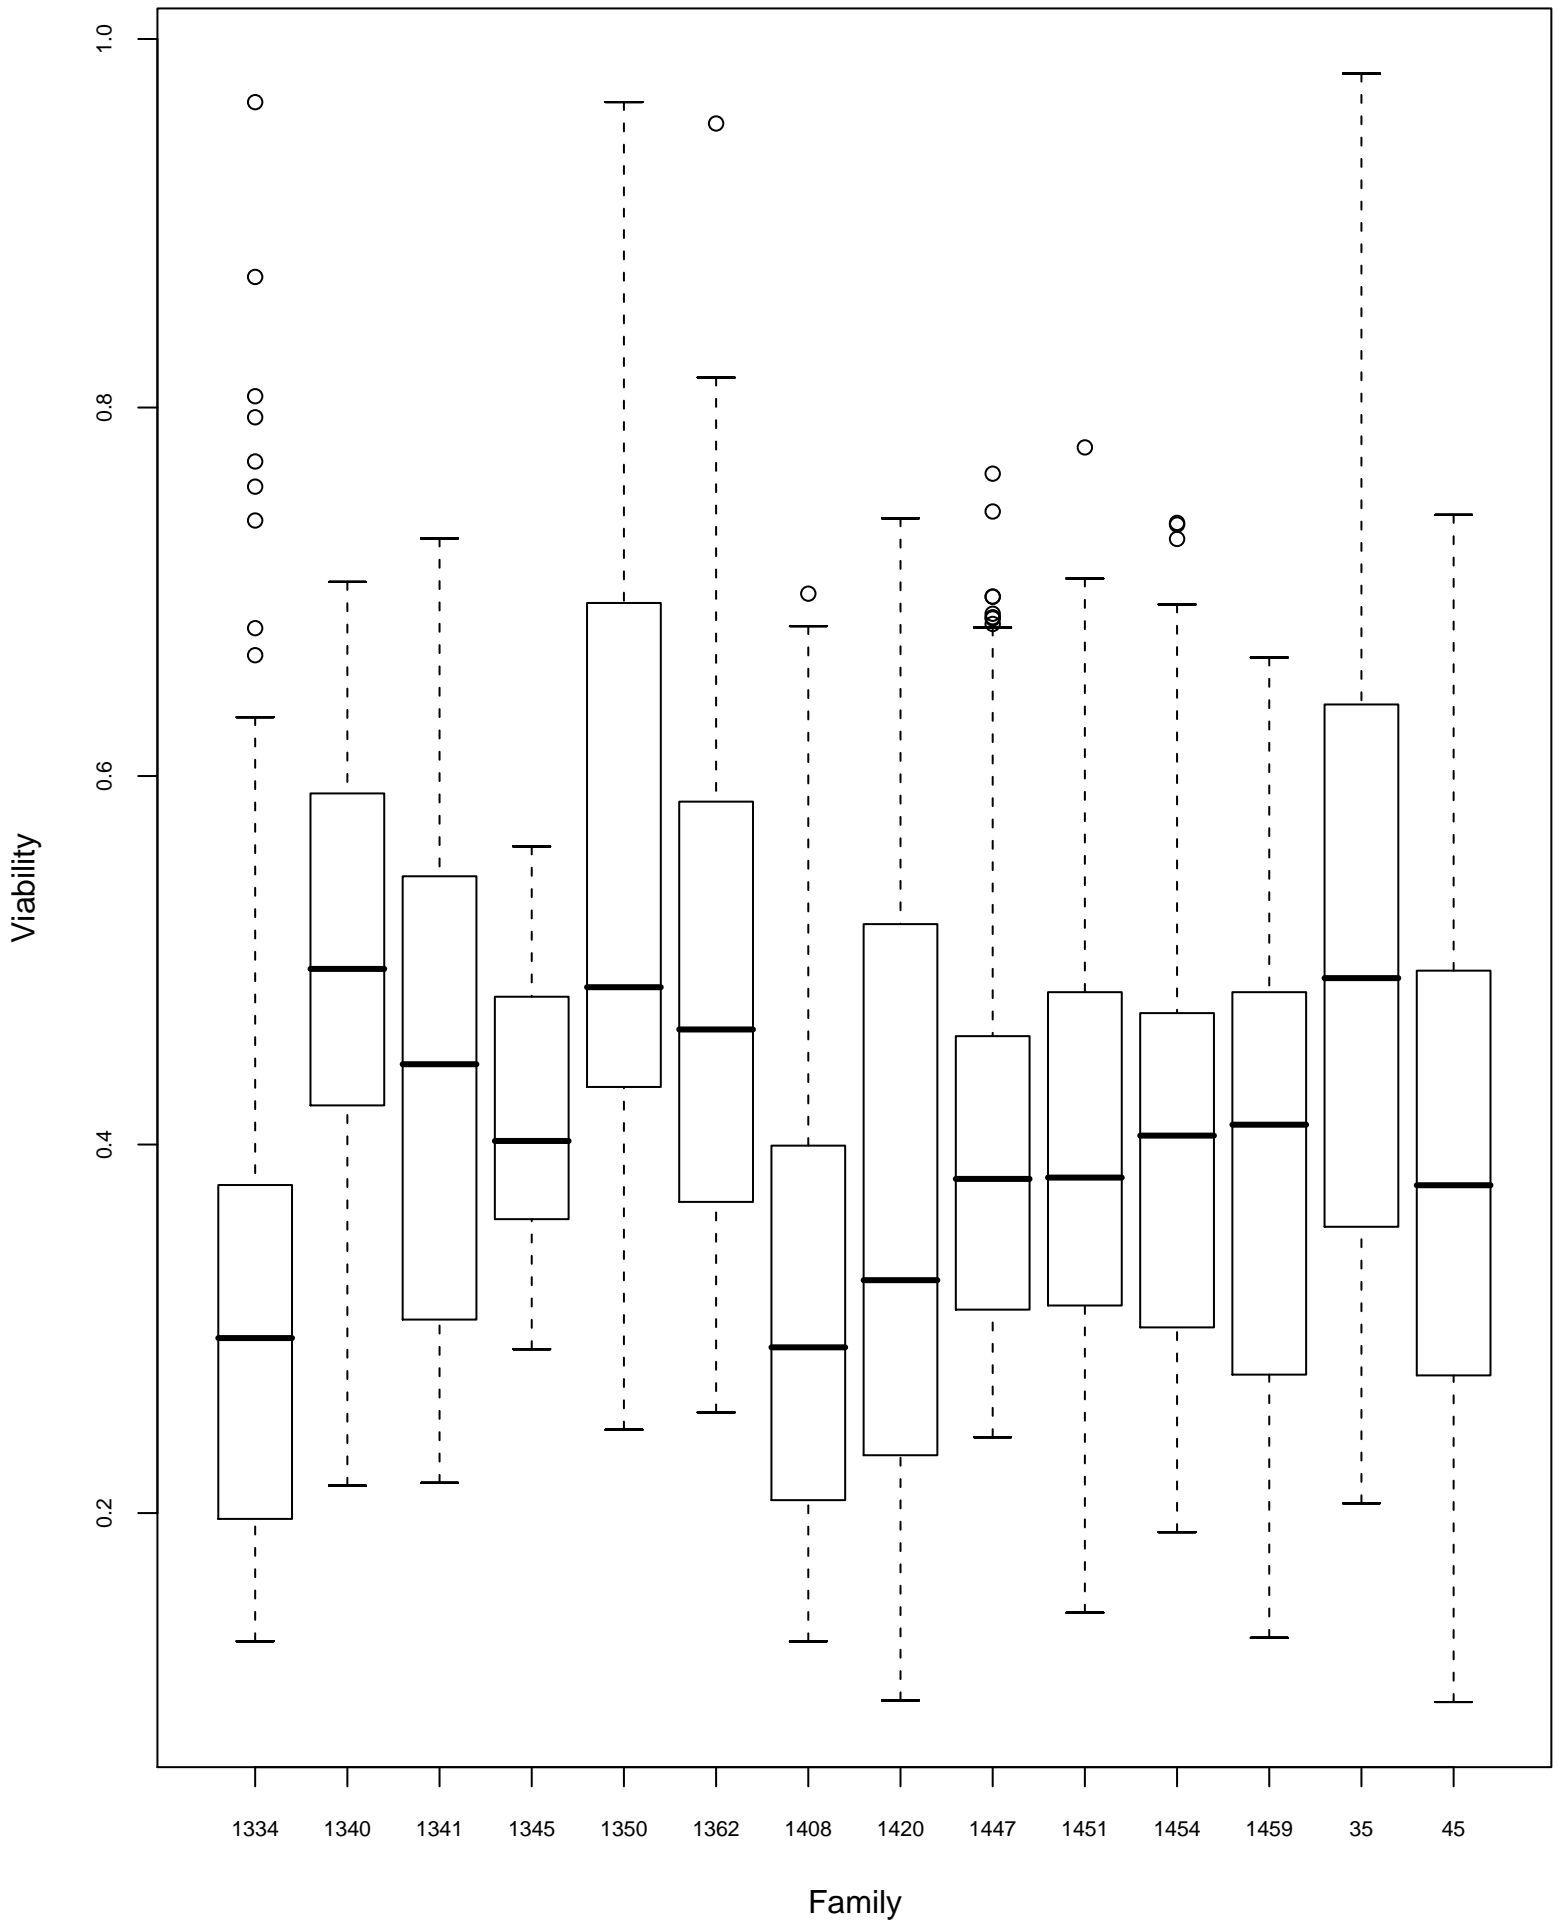



# Drug mCPT, dose 0.015 (mM)

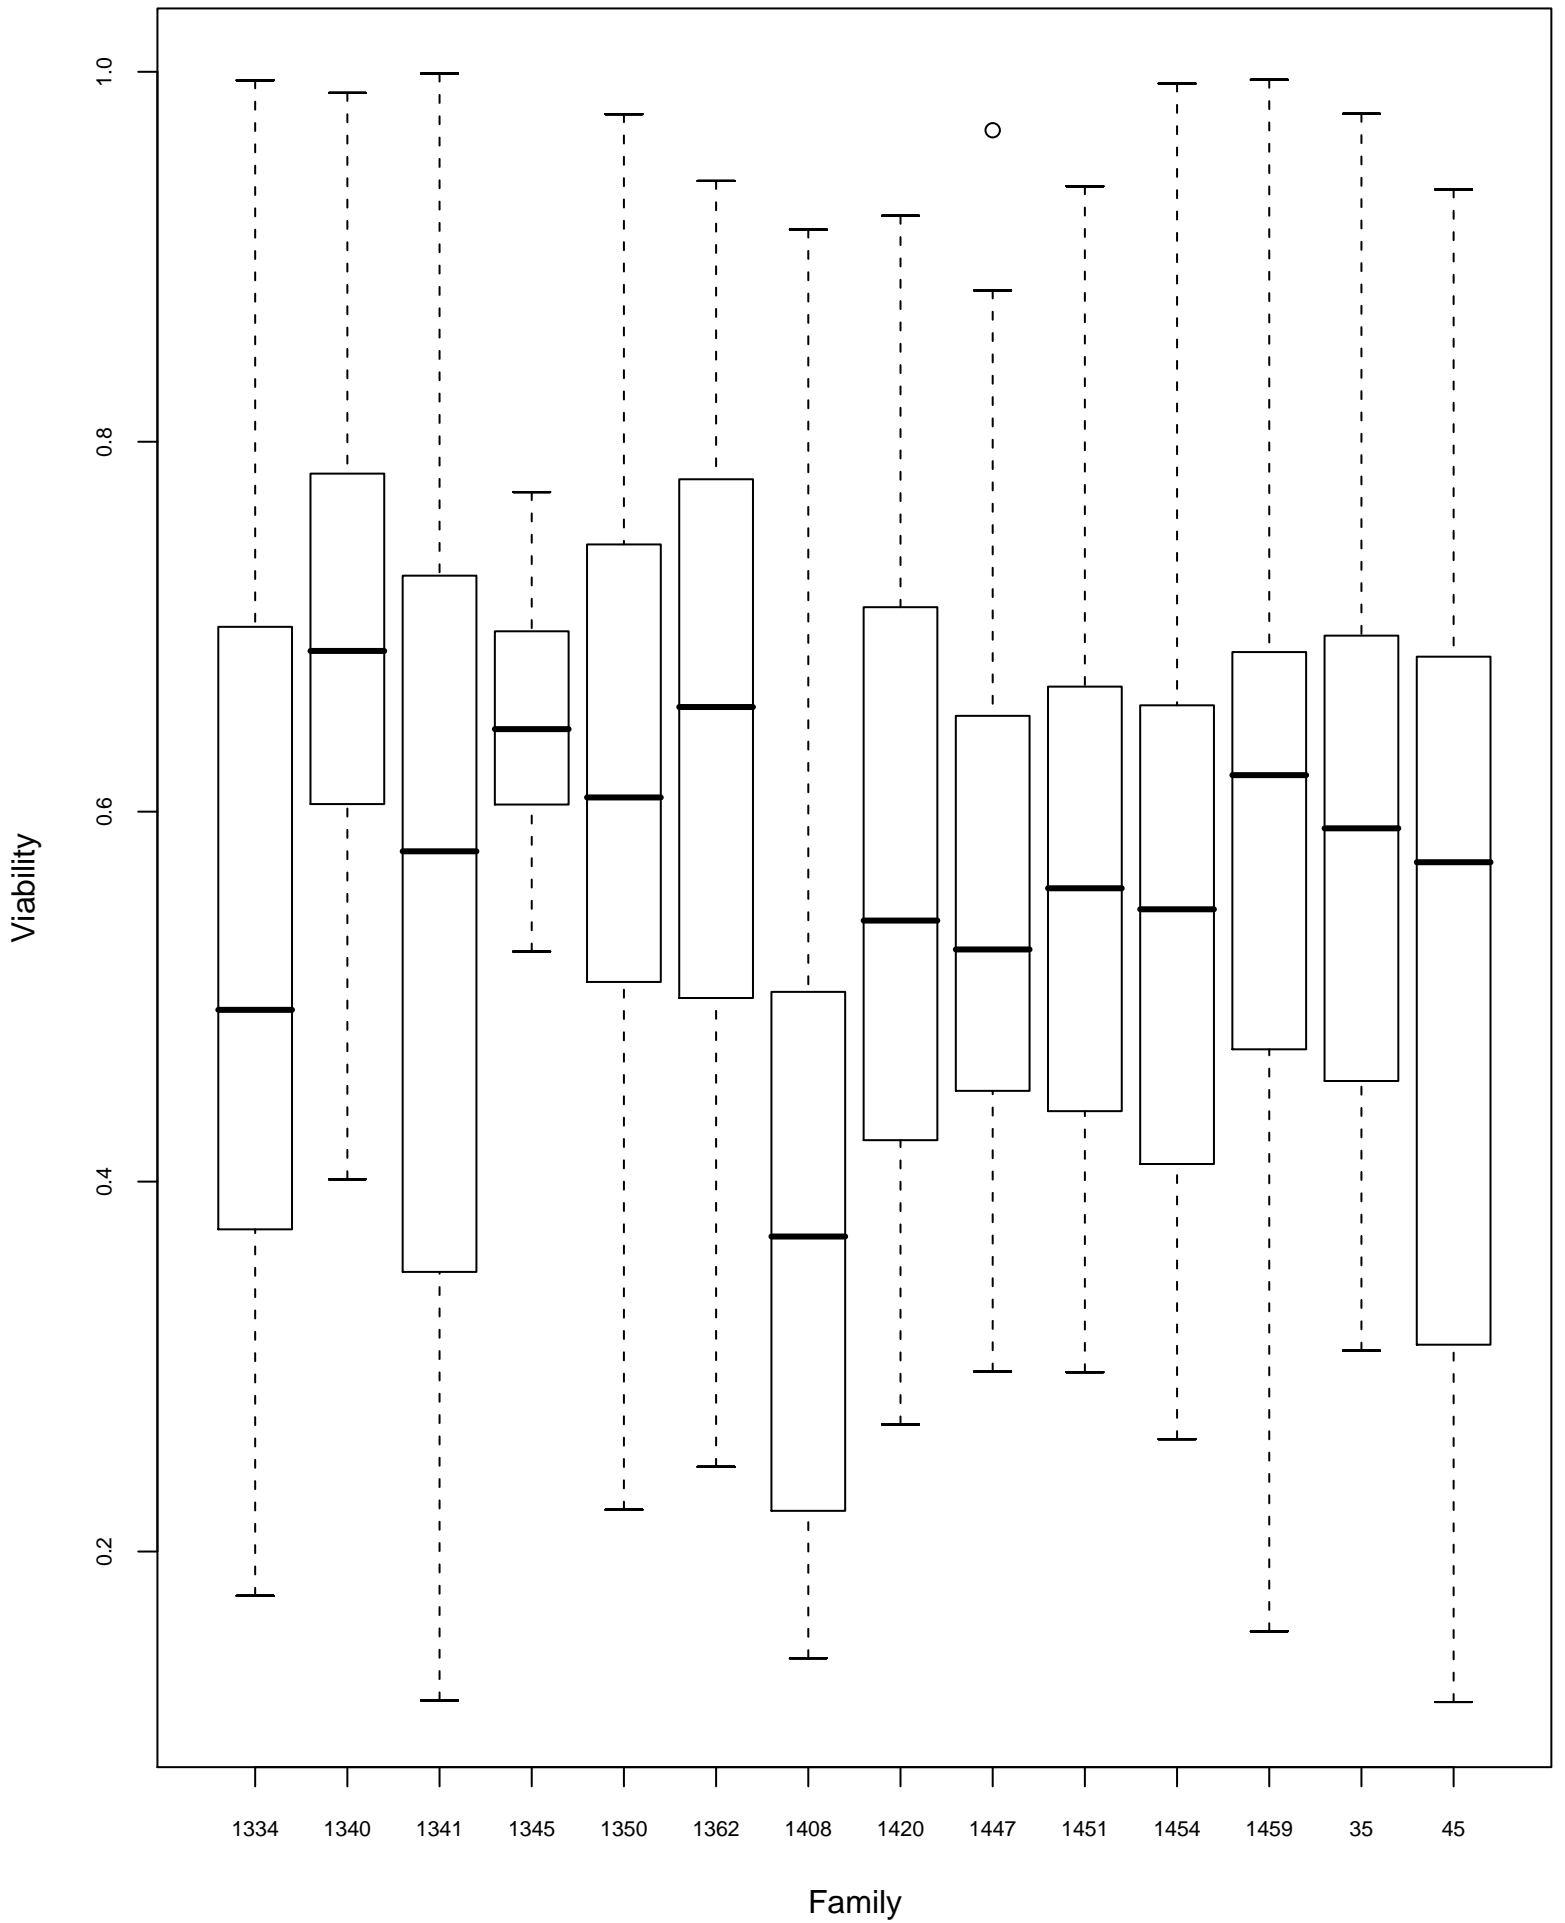

# Drug mCPT, dose 0.008 (mM)

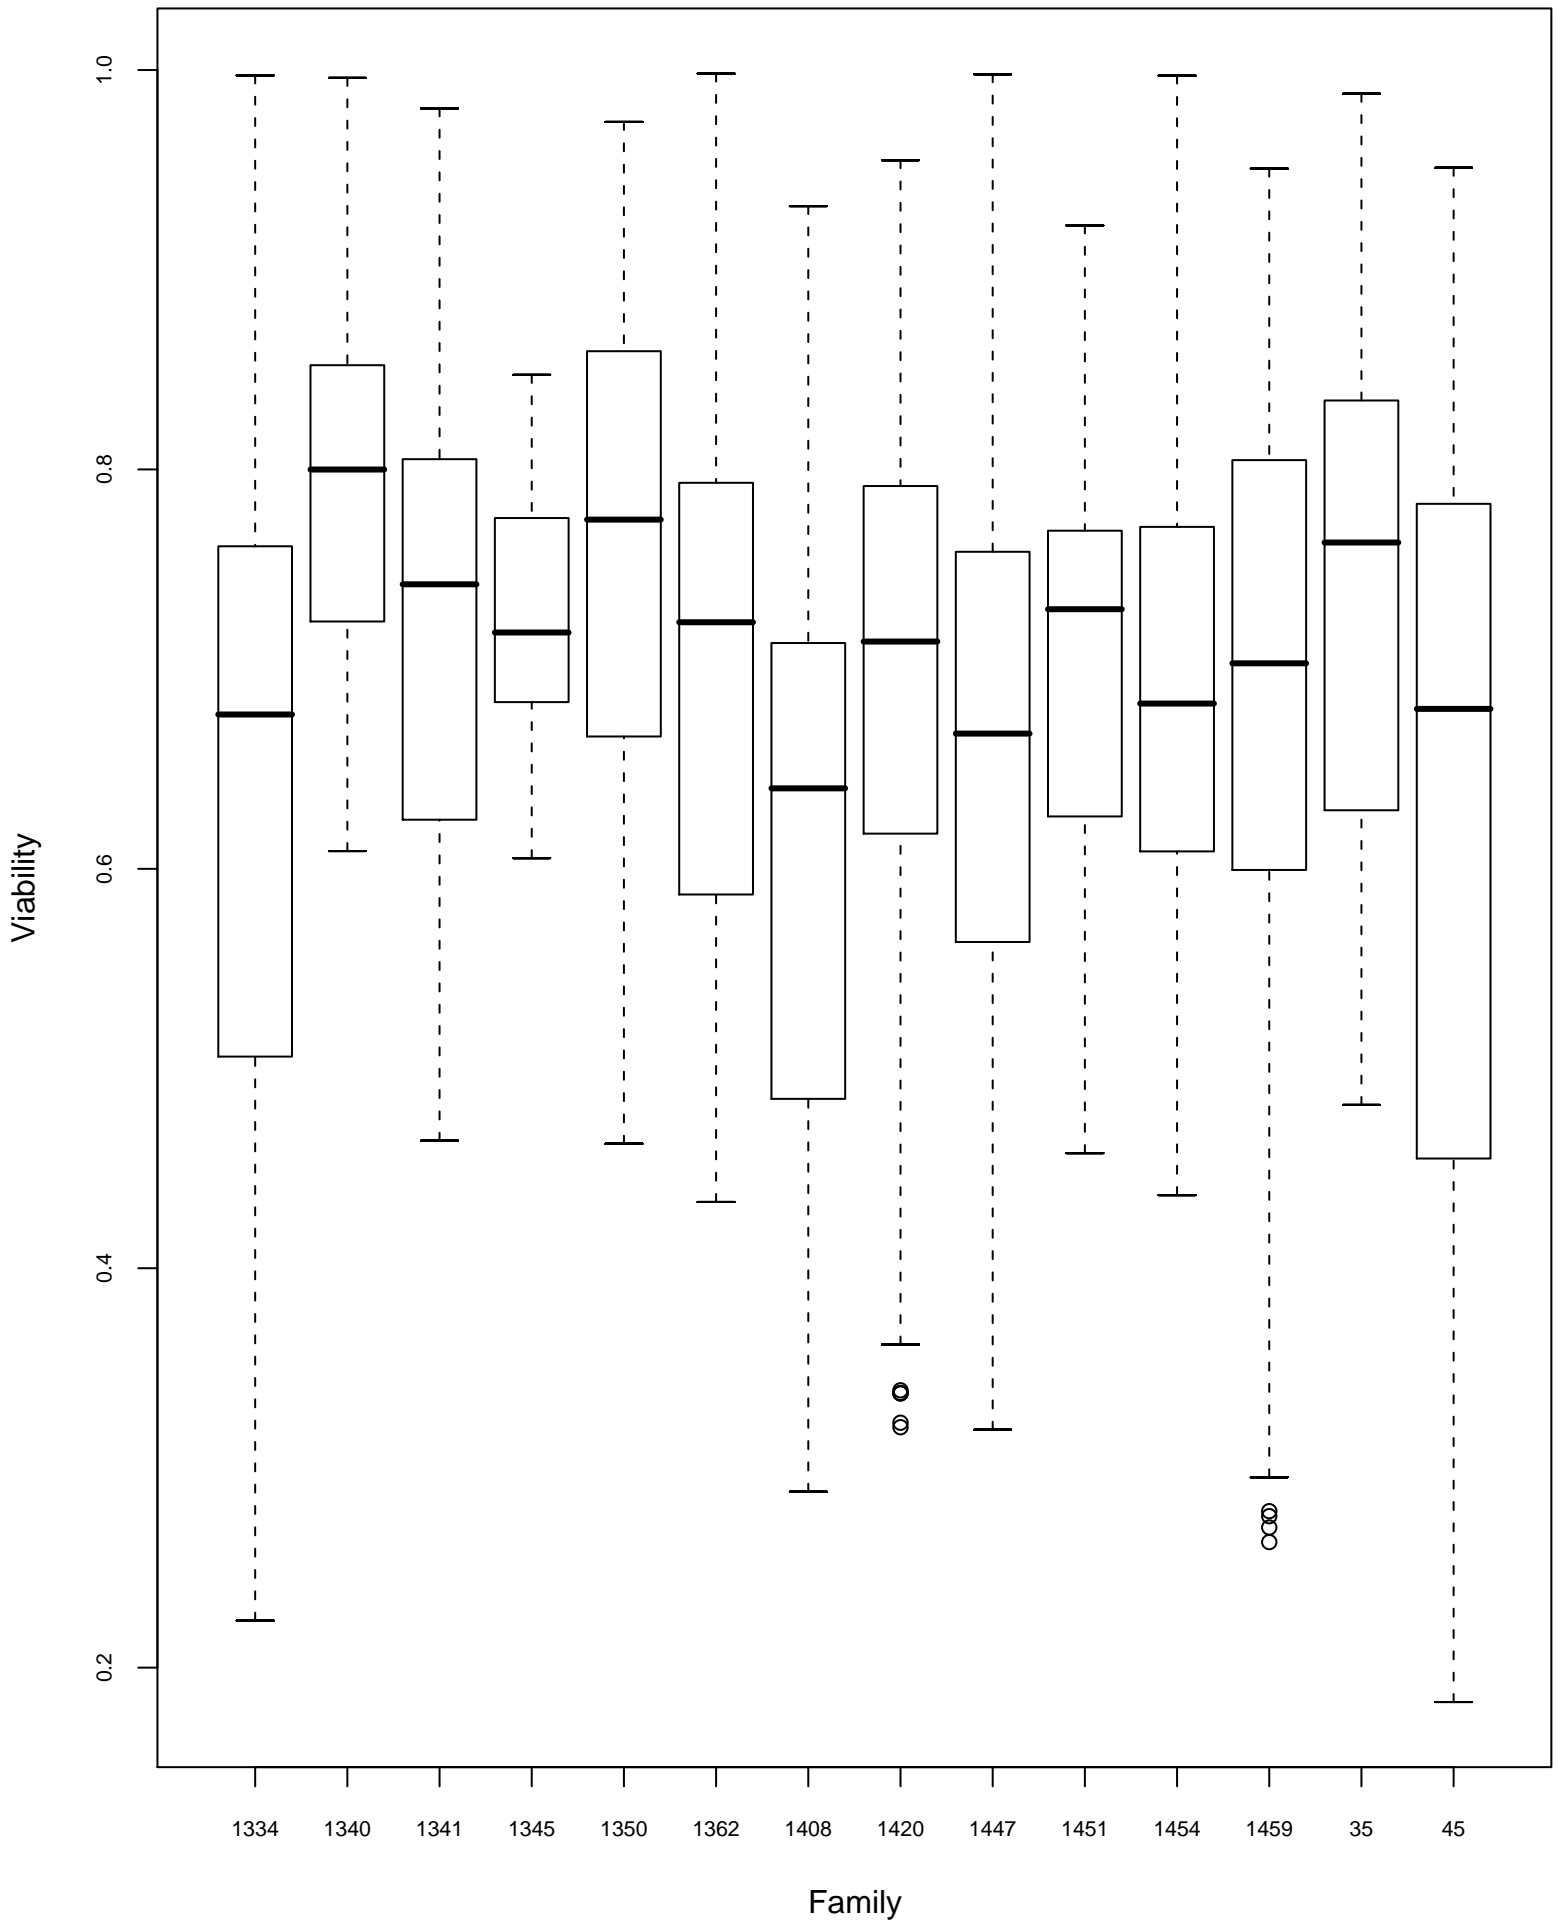

# Drug mCPT, dose 0.005 (mM)

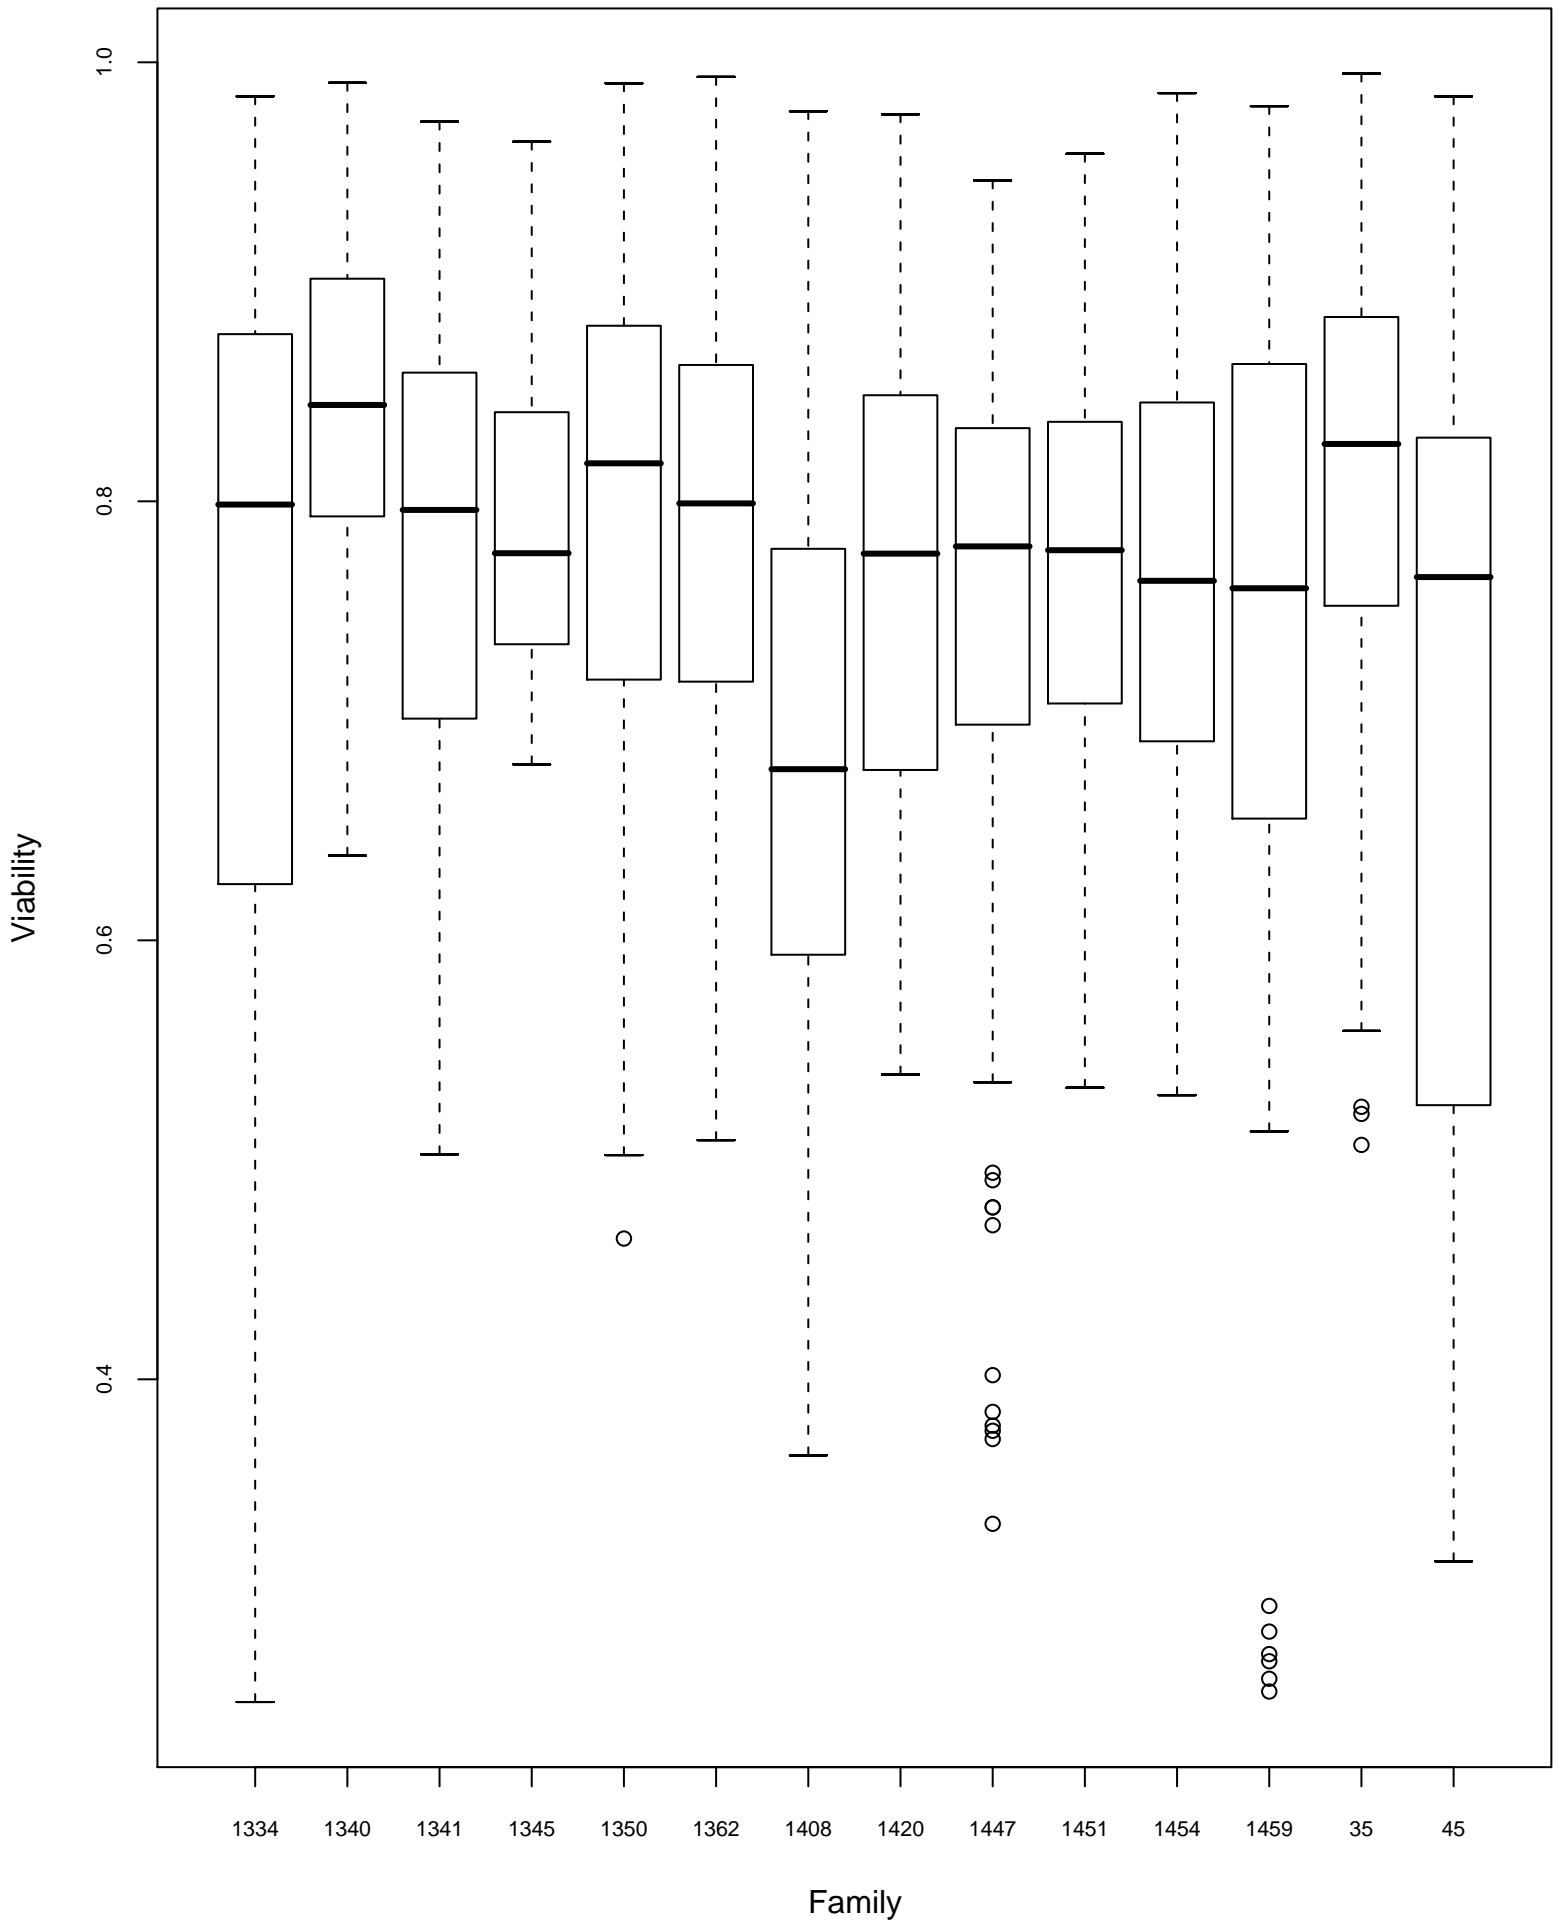

# Drug mCPT, dose 0.003 (mM)

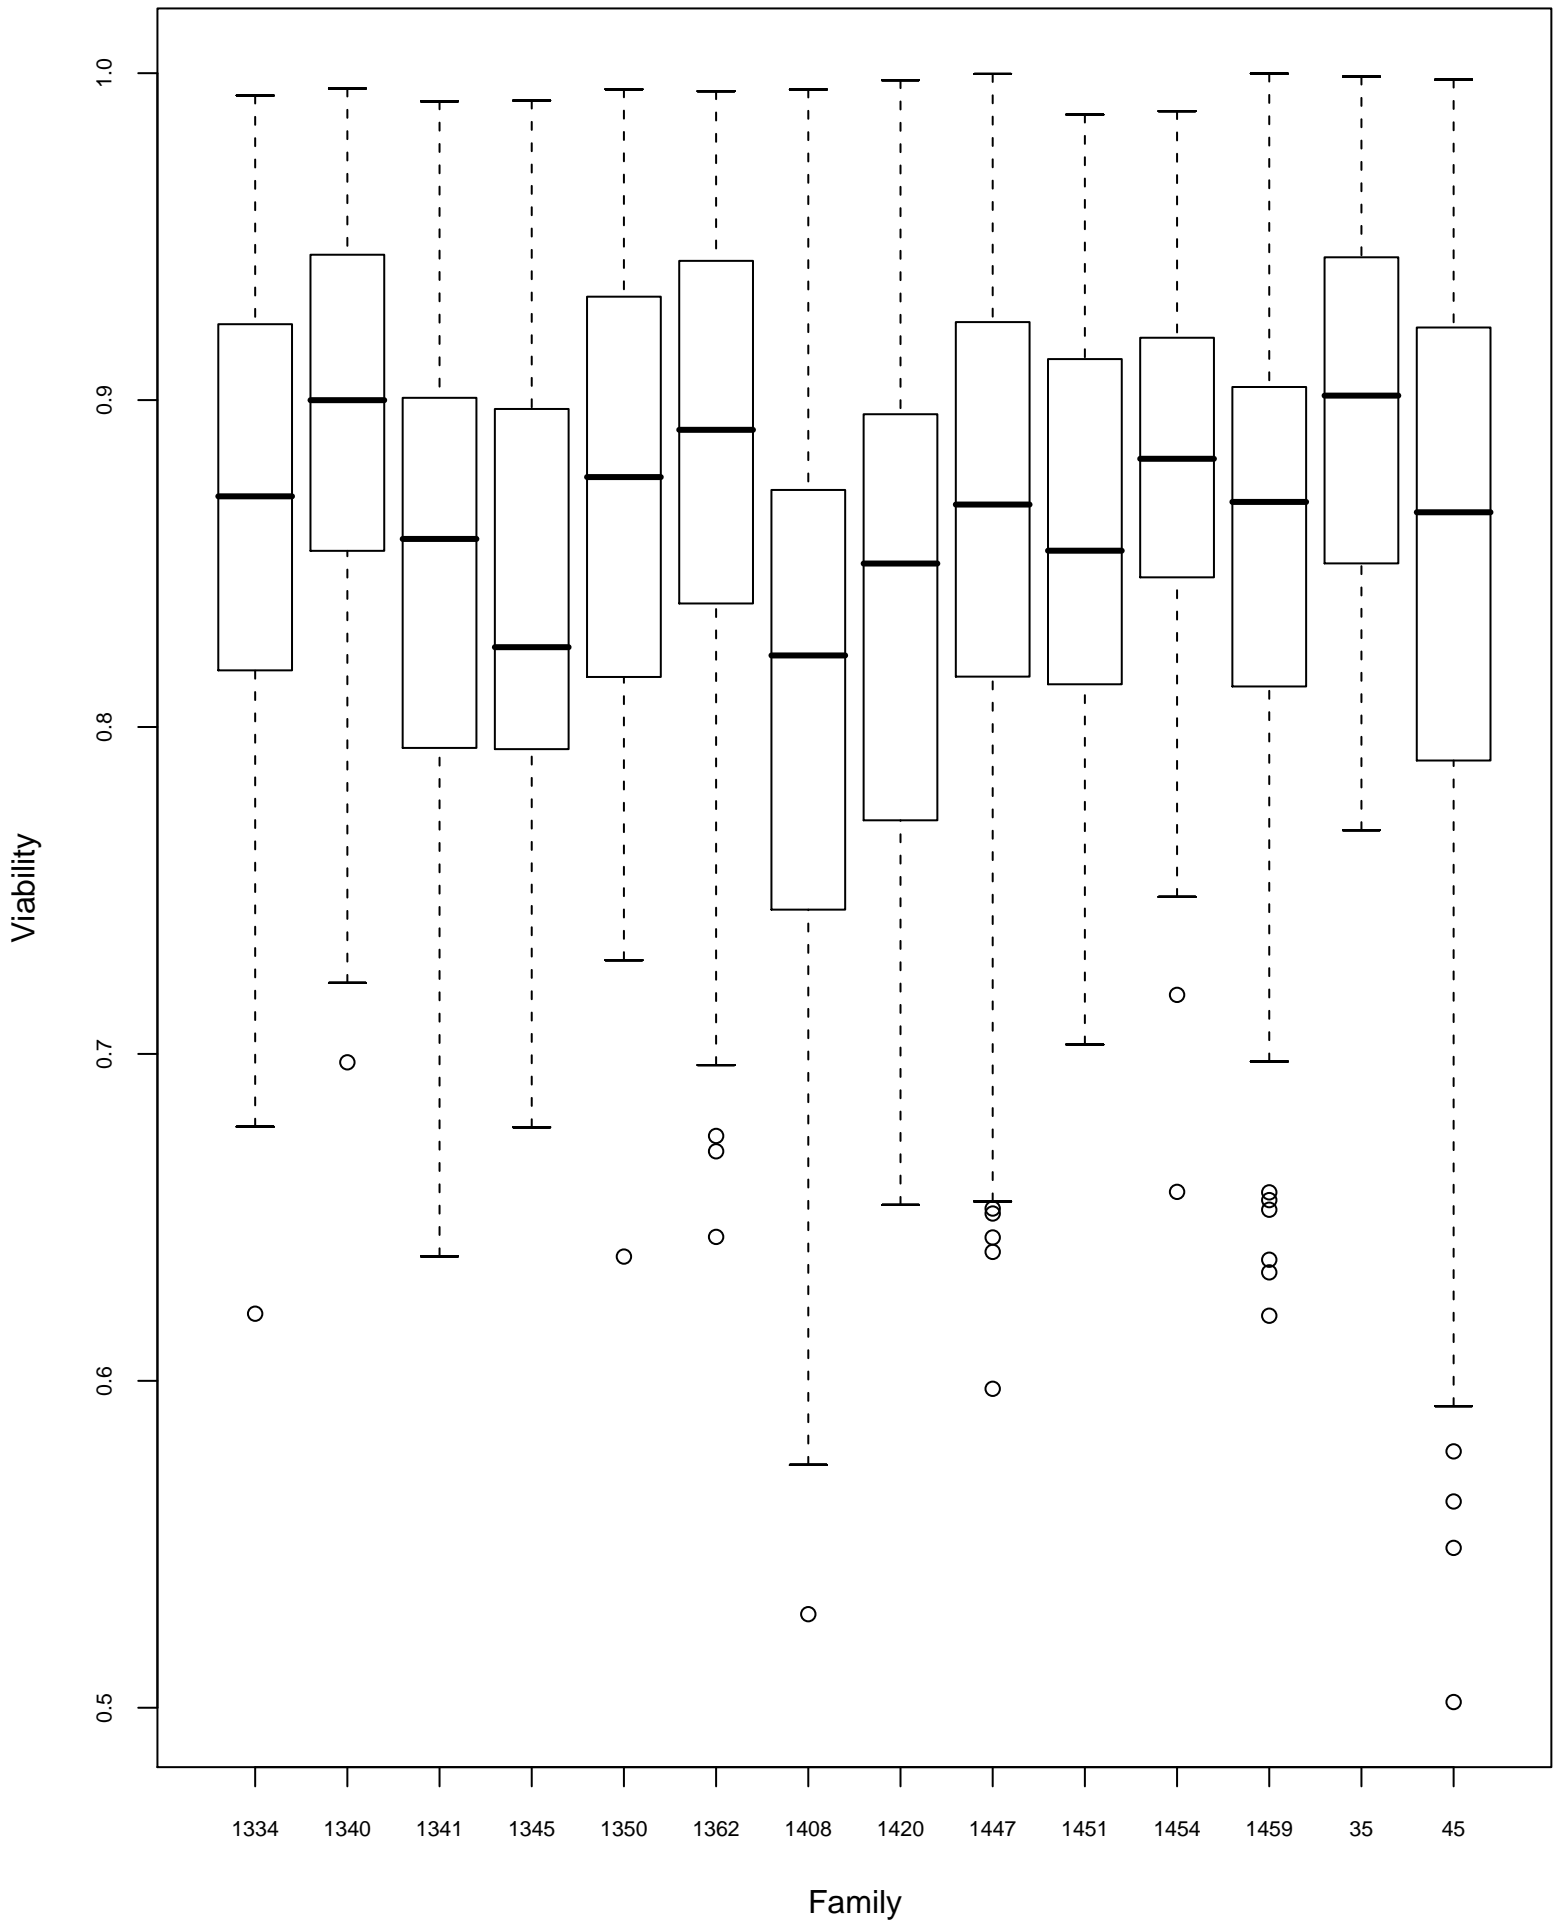

# Drug mCPT, dose 0.002 (mM)

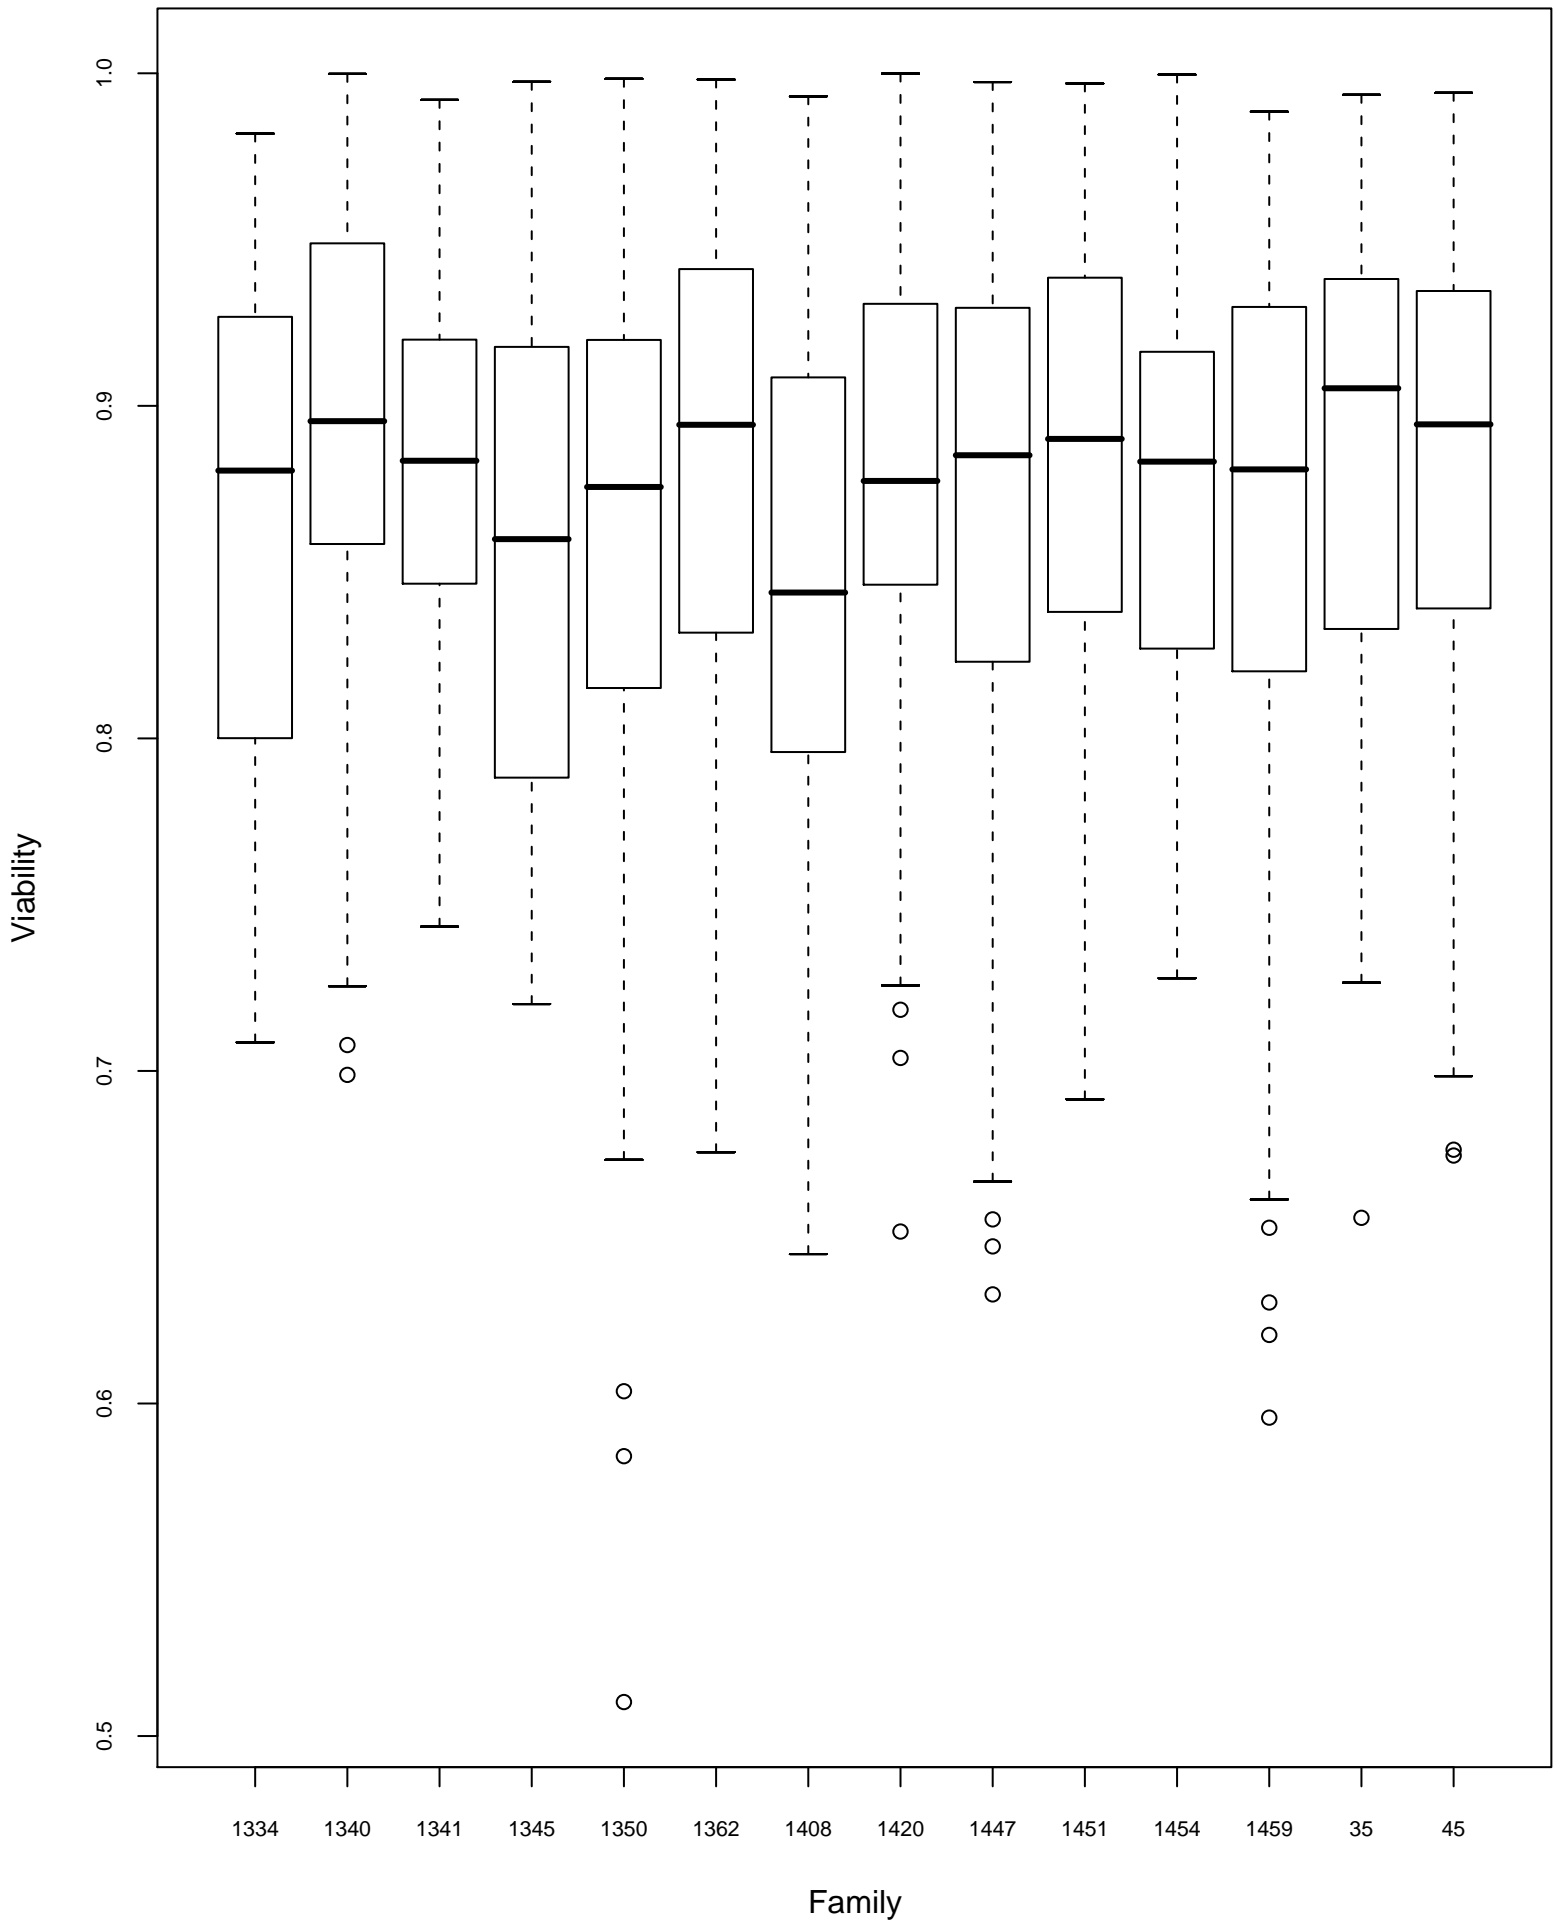

# Drug mCPT, dose 0.001 (mM)

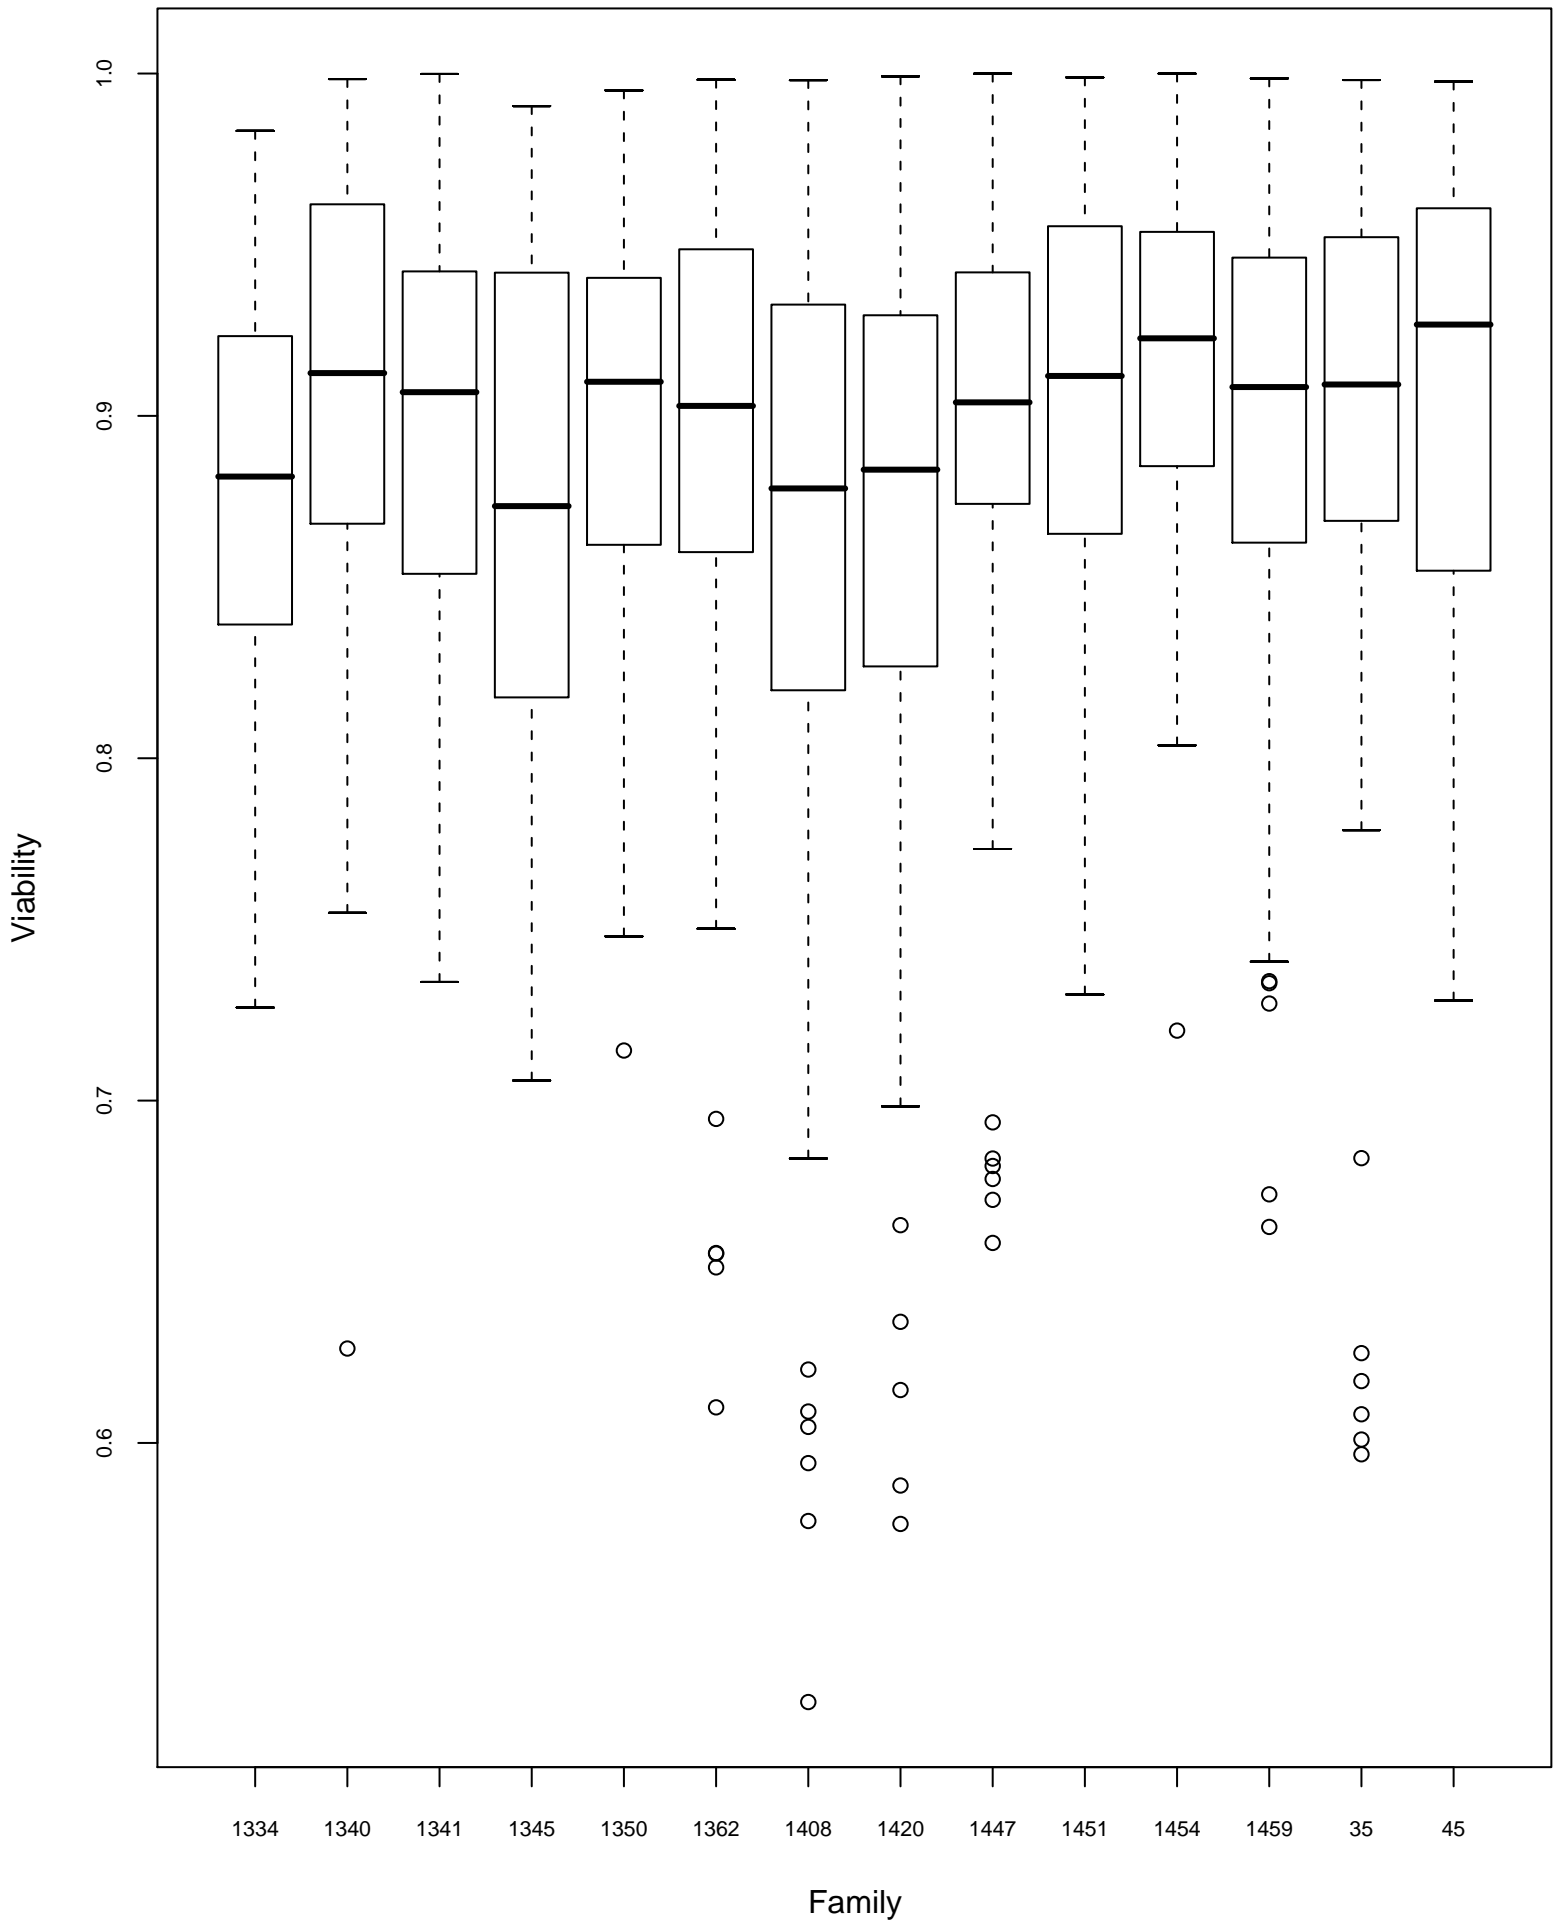

# Drug mCPT, dose 0.0001 (mM)

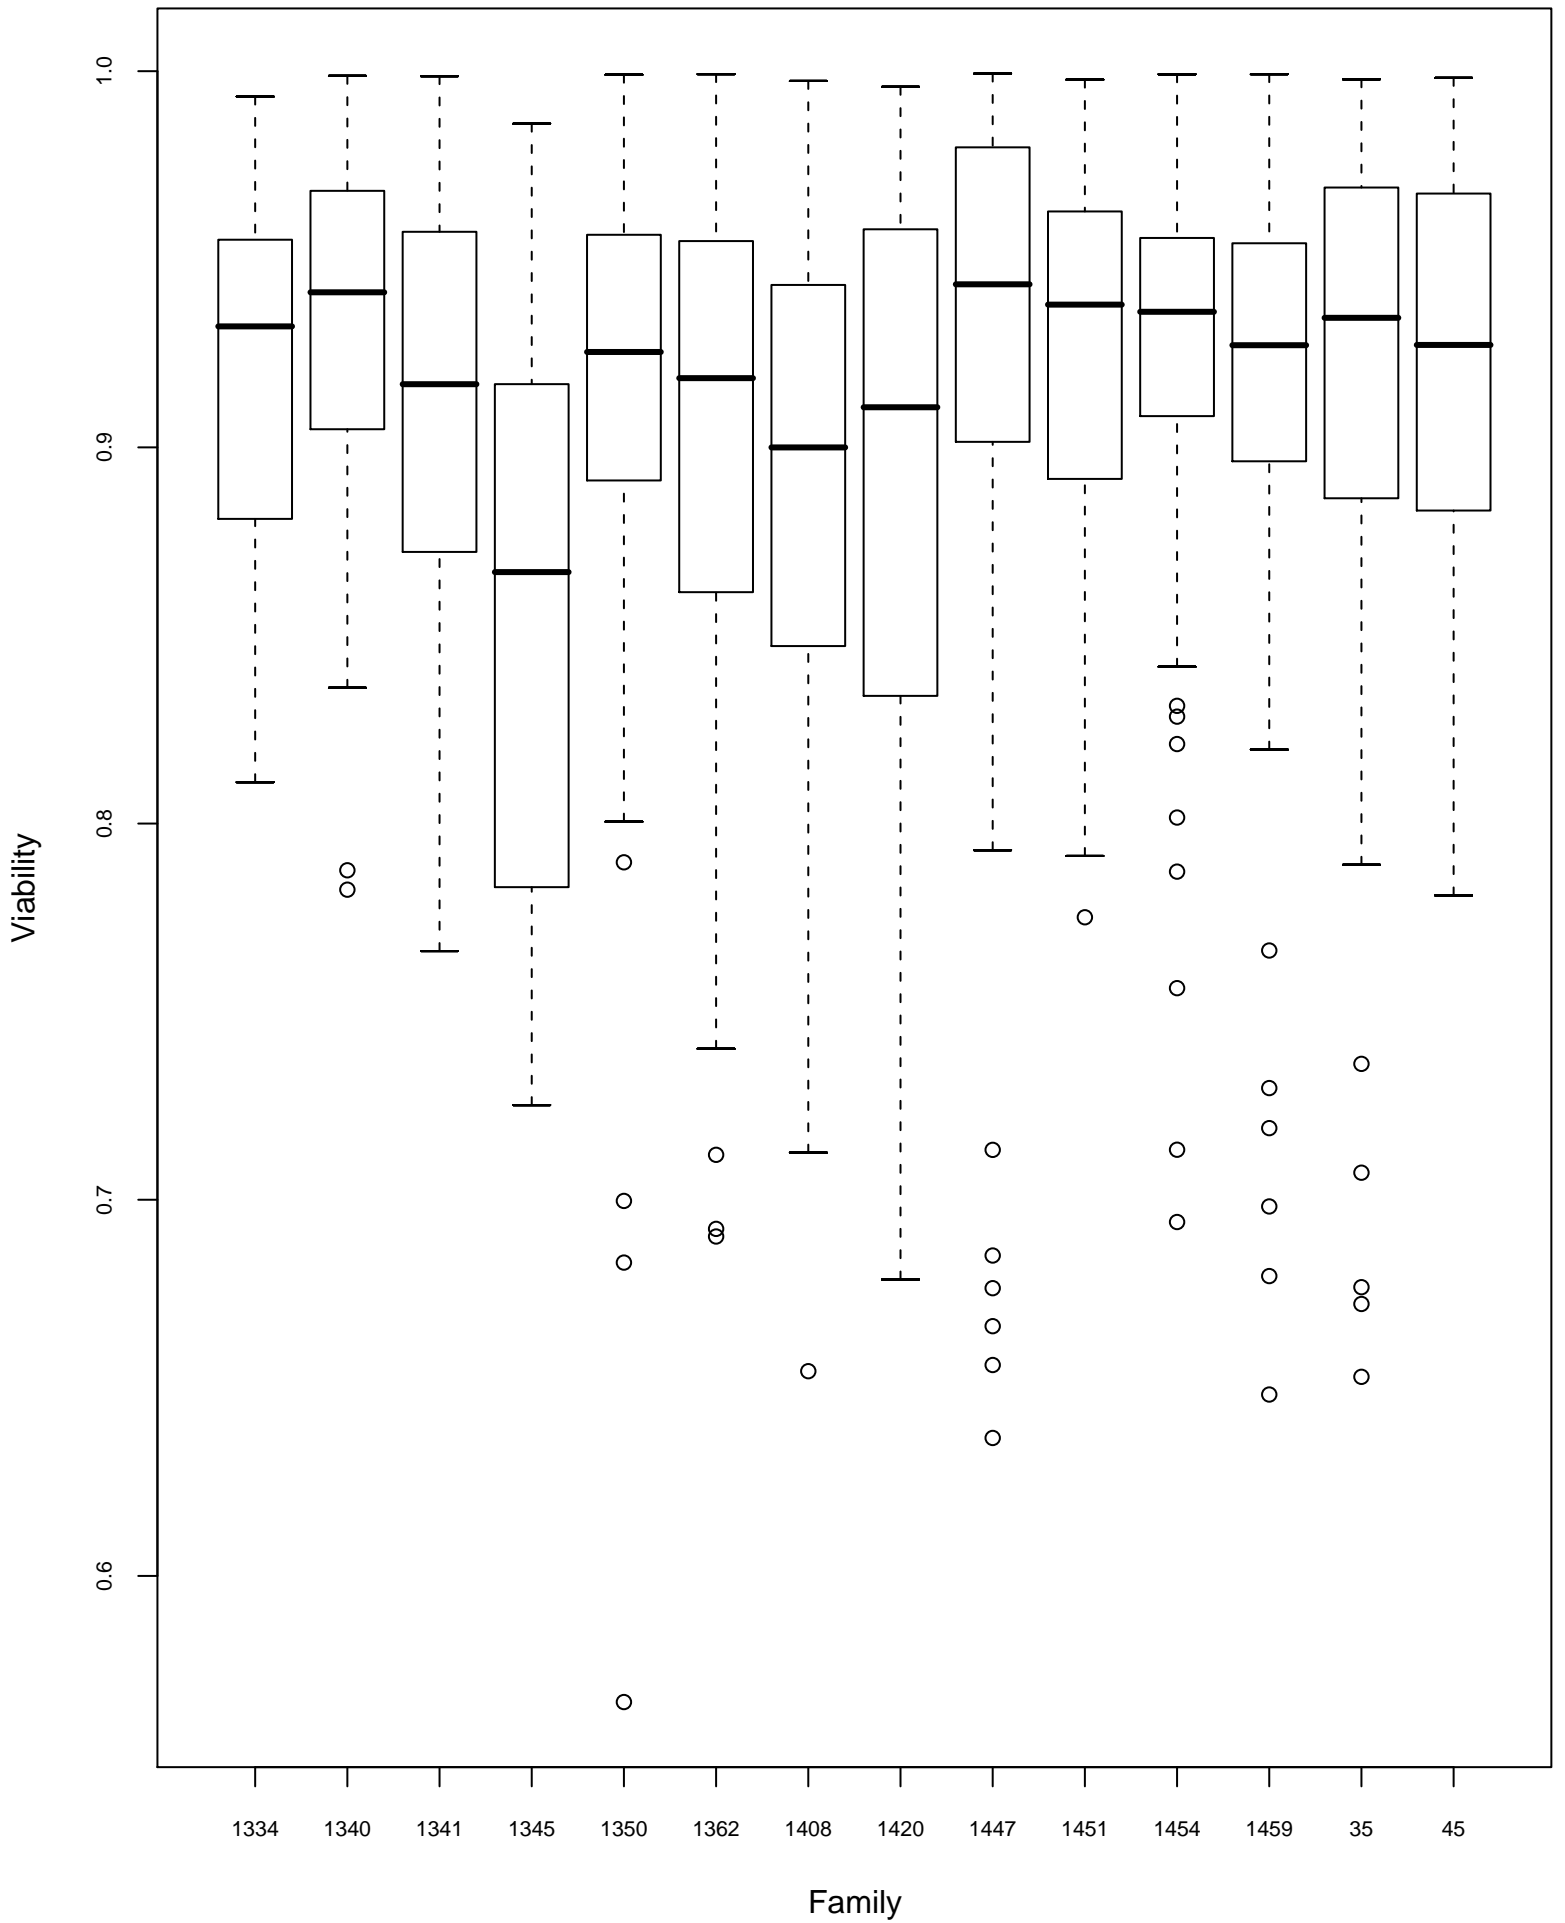

Supplement: pone.0017561.s010.pdf [file pone.0017561.s010.pdf]
