# Supplementary material for: Identification and Replication of Loci Involved in Camptothecin-Induced Cytotoxicity Using CEPH Pedigrees
Source: PubMed Central journal article supplement (PMC3088663; doi:10.1371/journal.pone.0017561), 2011-05-05

# 7-ethyl-10-hydroxy-camptothecin (SN38)

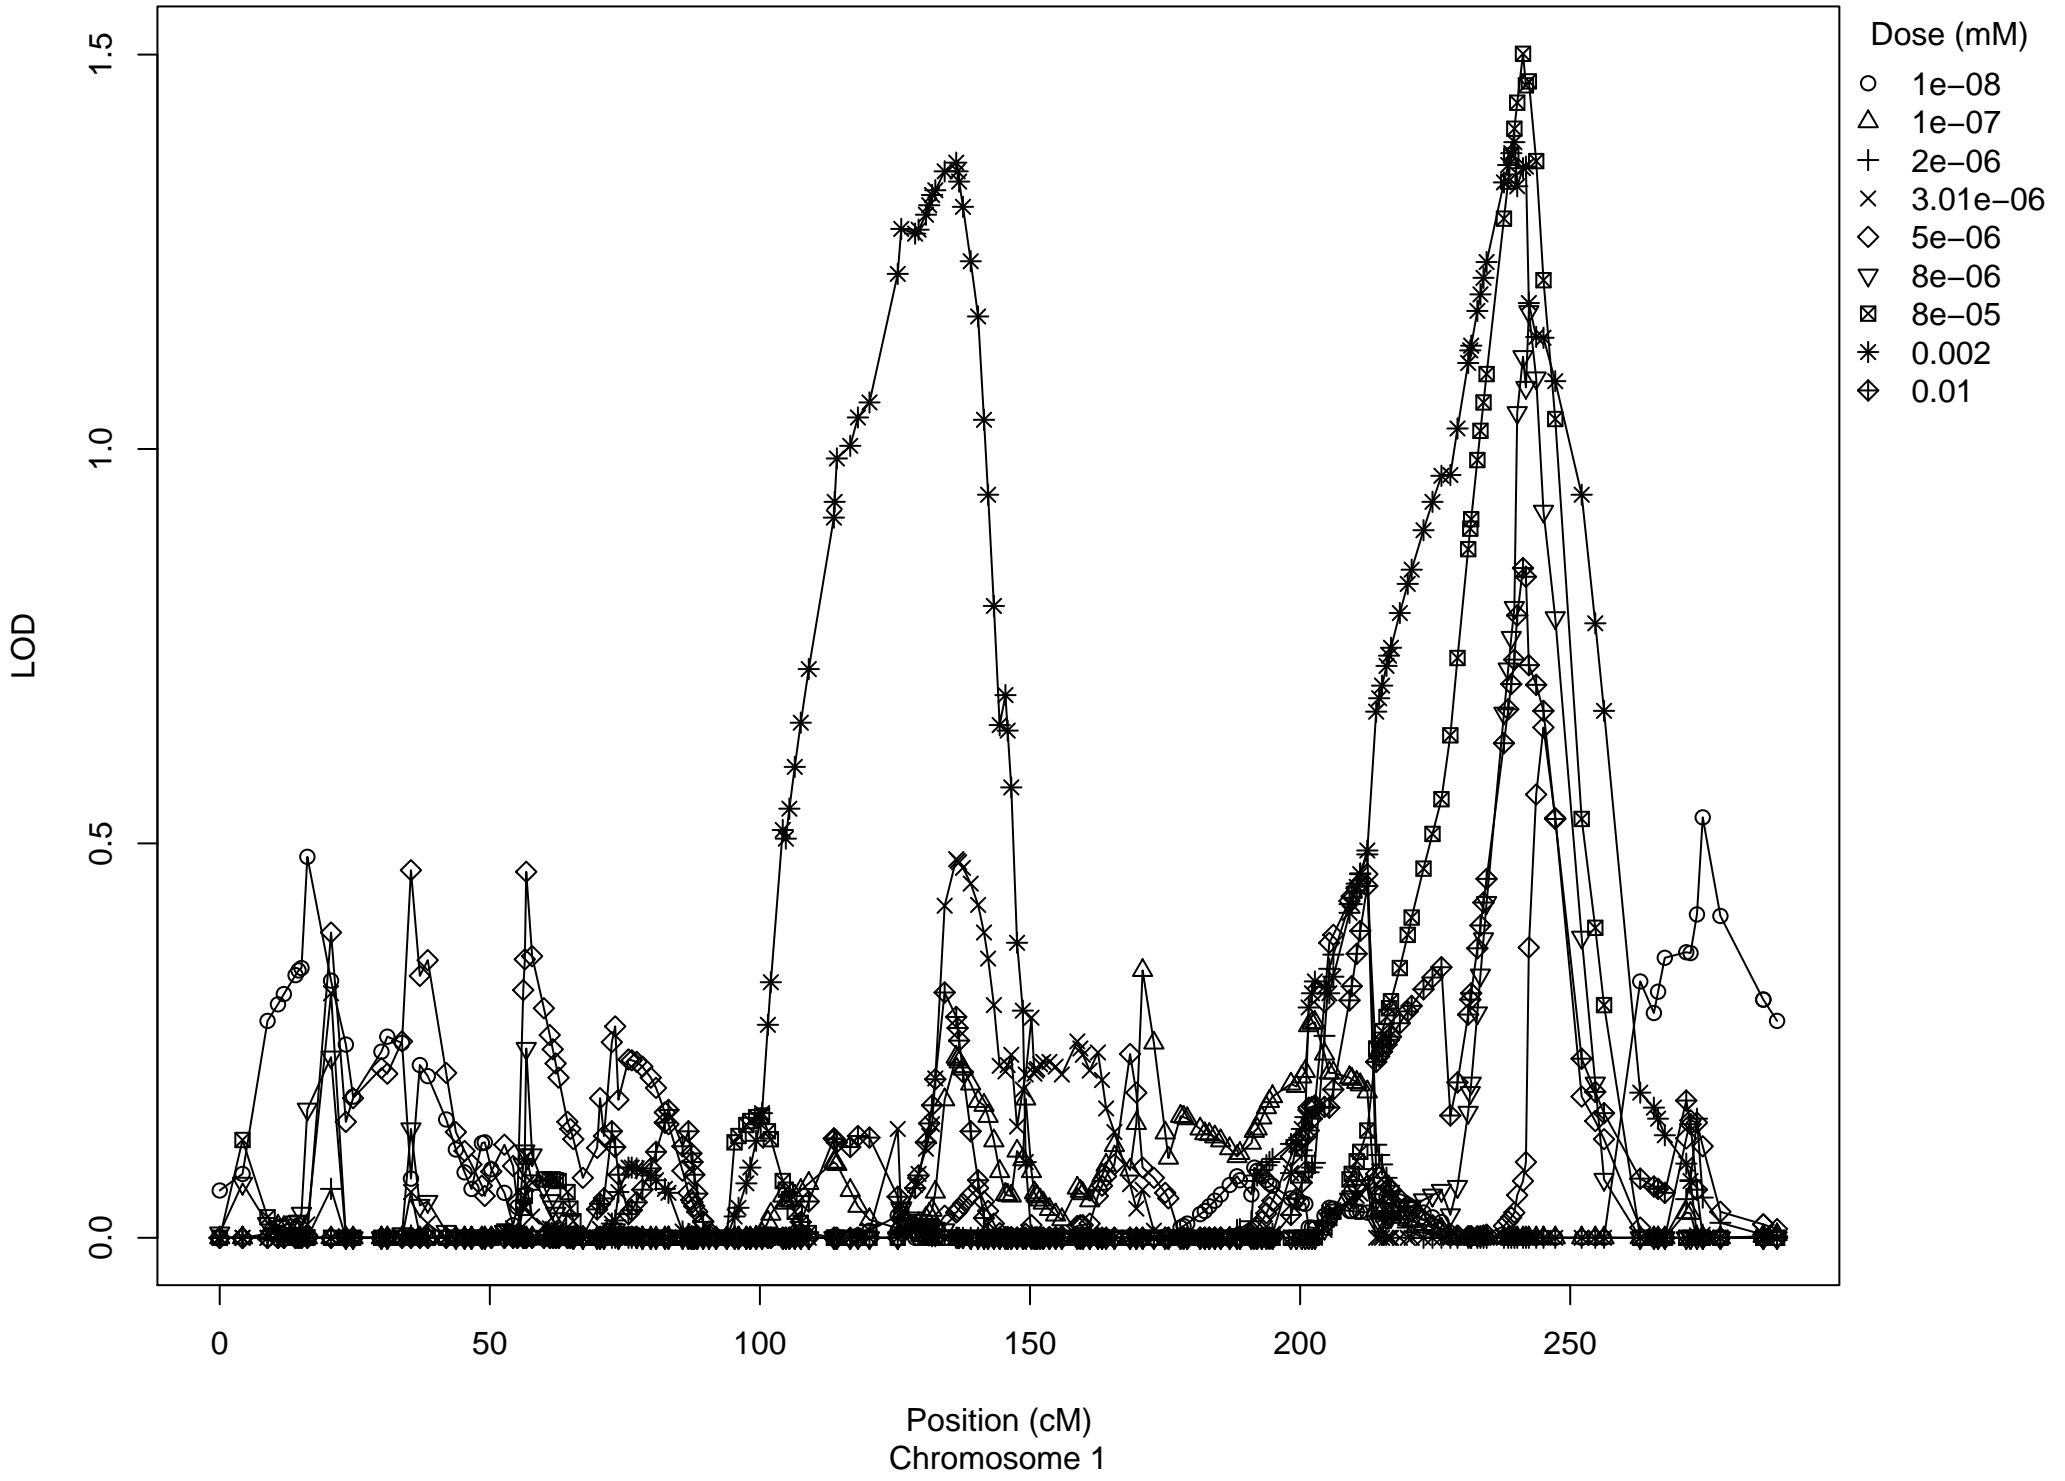

# 7-ethyl-10-hydroxy-camptothecin (SN38)

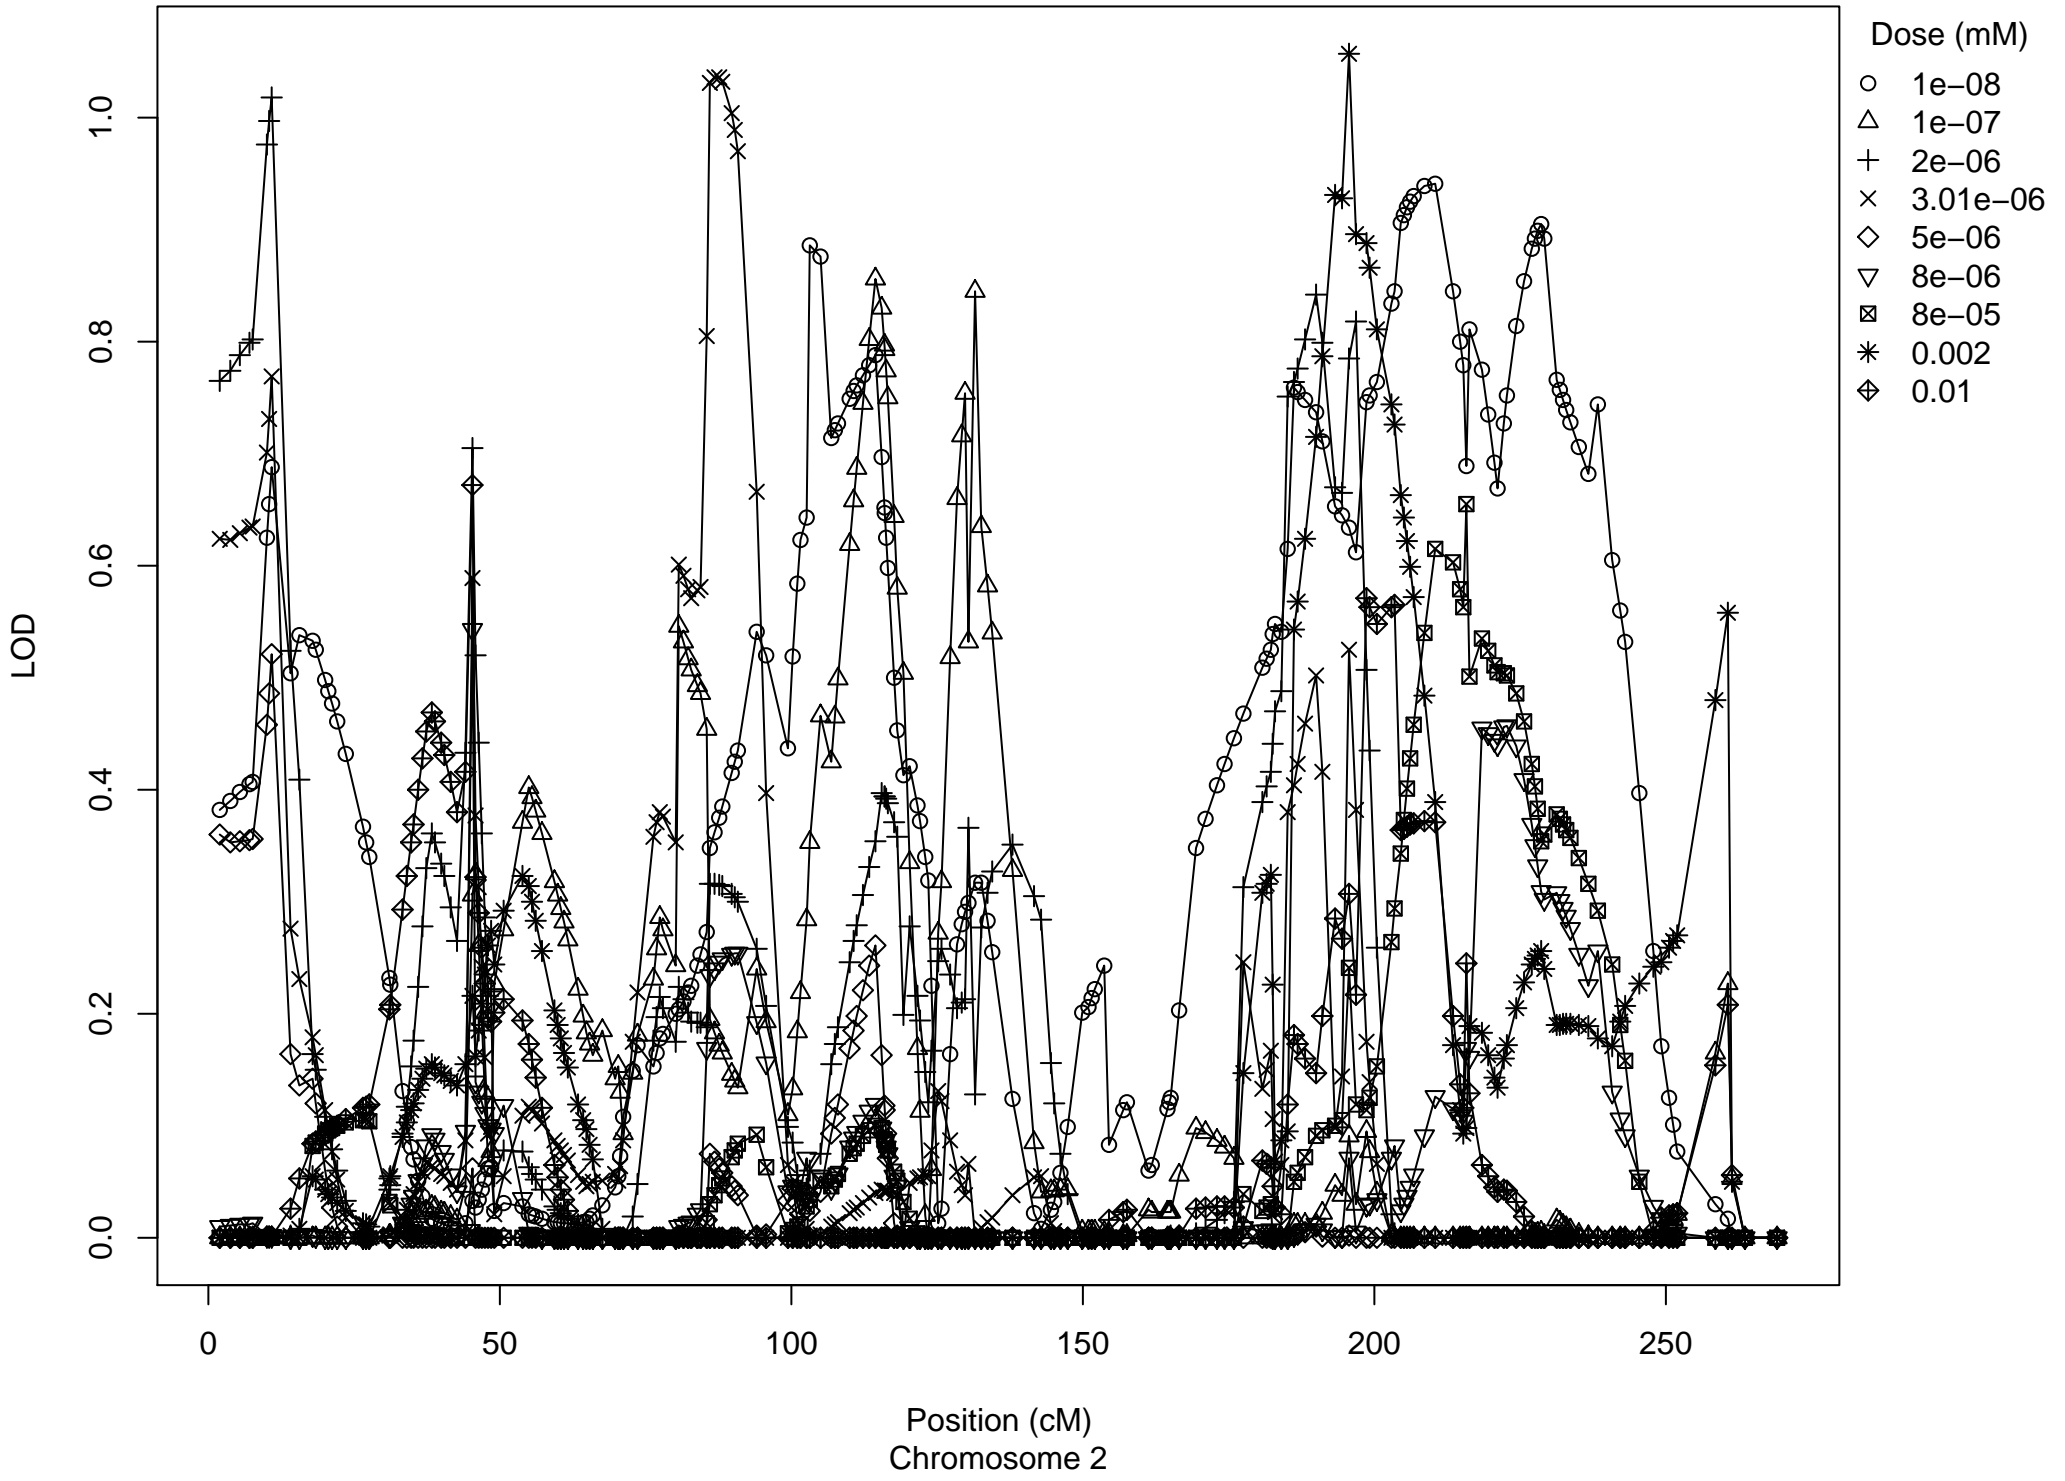

# 7-ethyl-10-hydroxy-camptothecin (SN38)

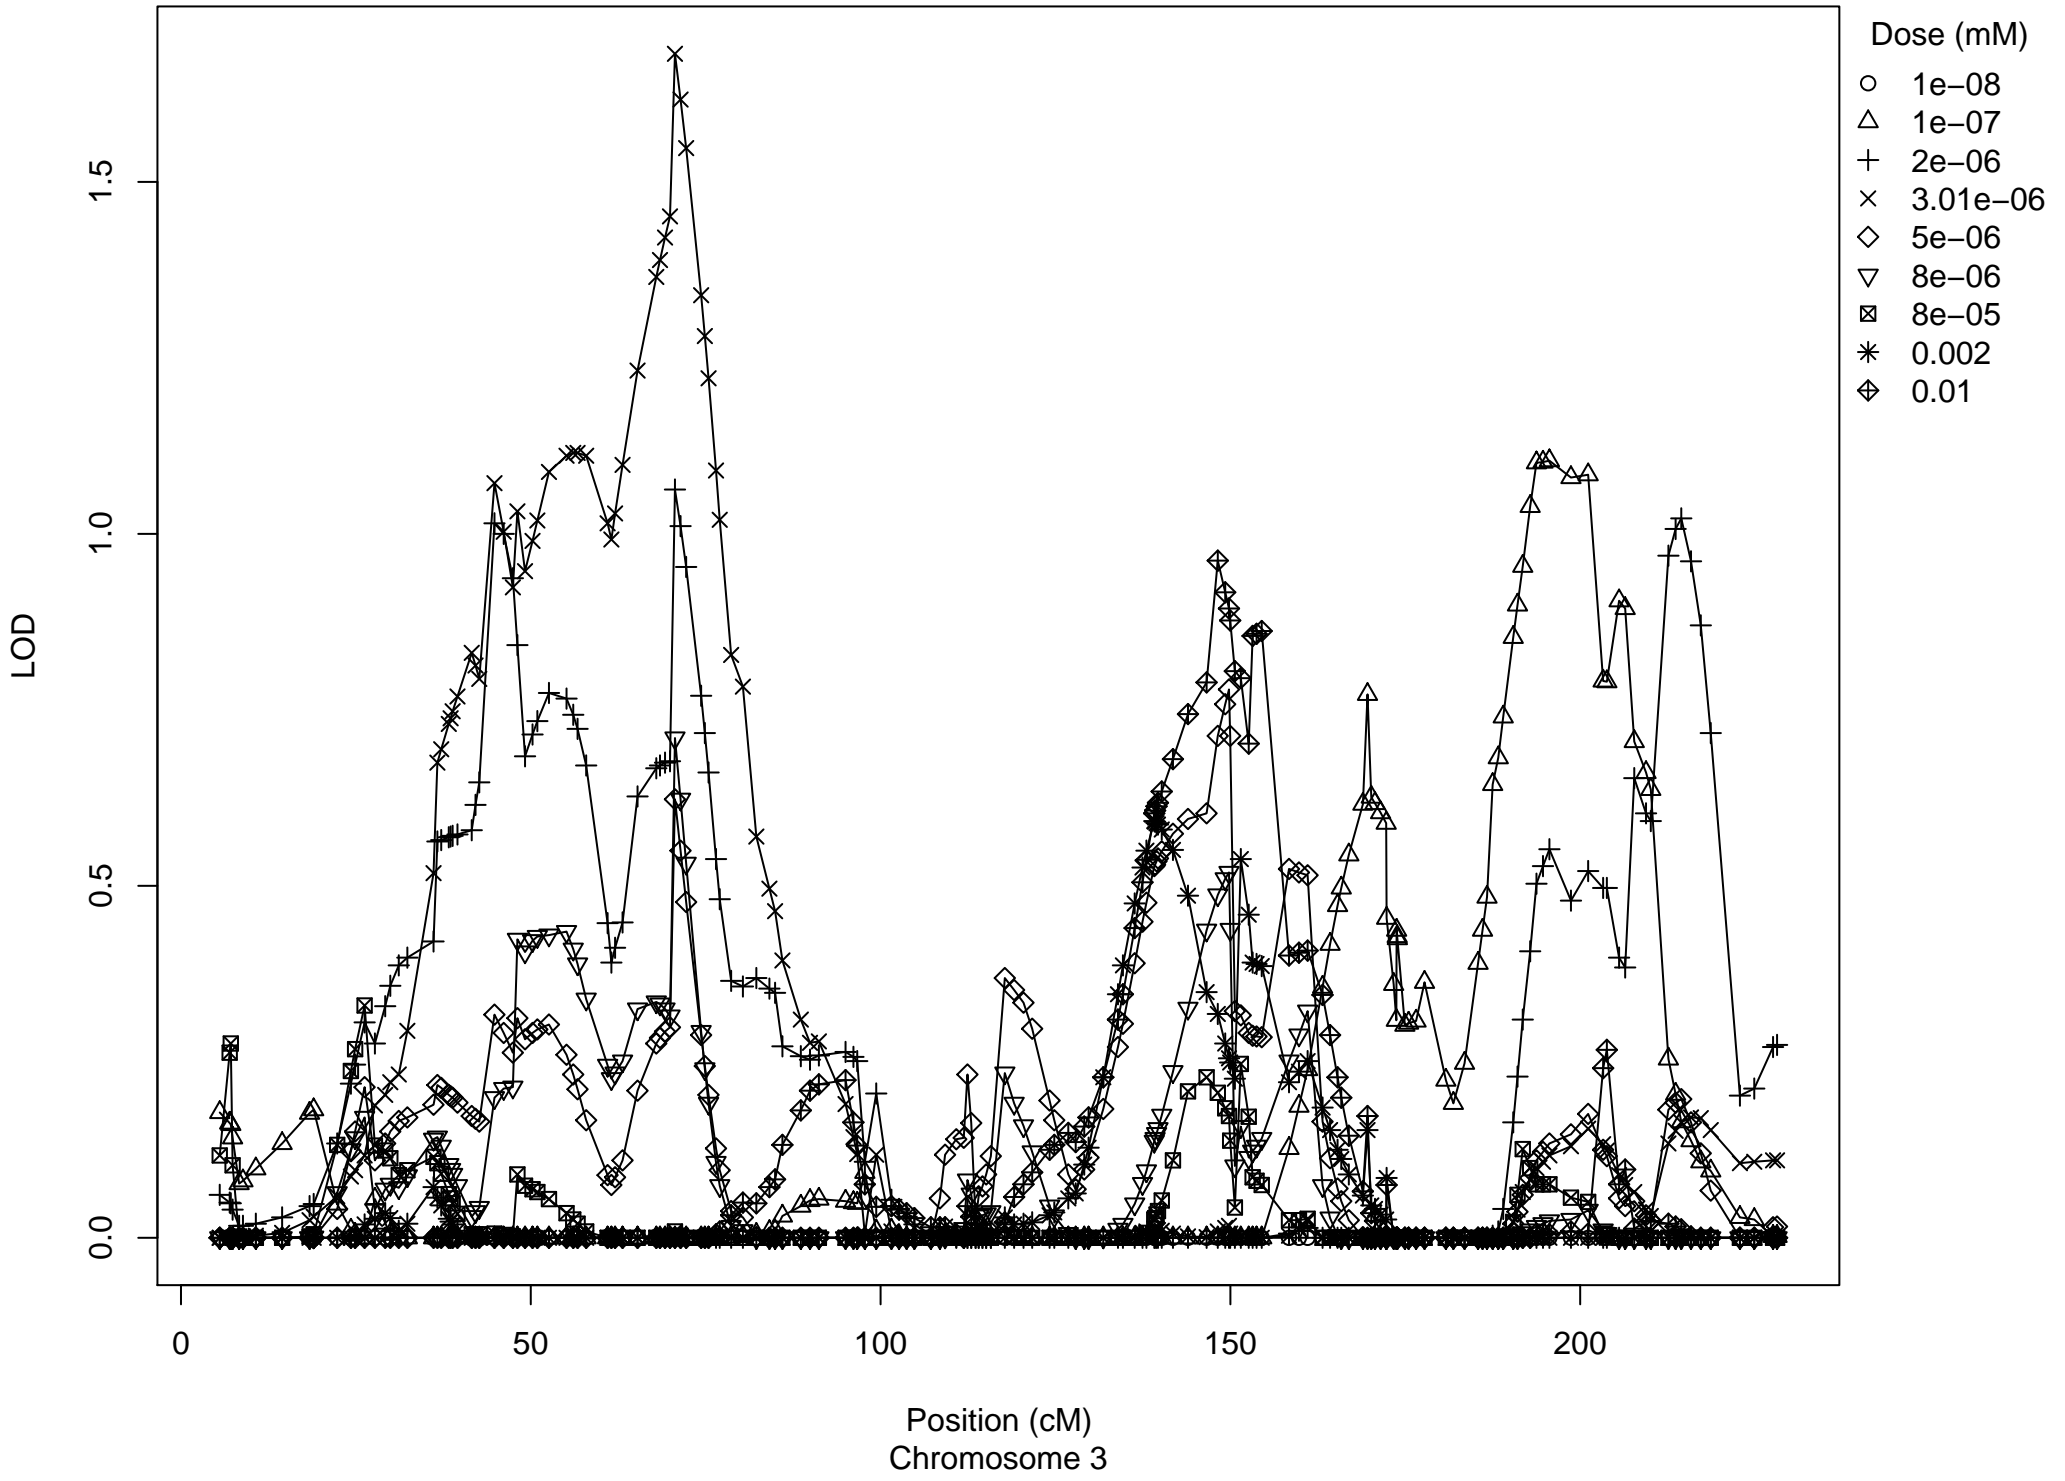



# 7-ethyl-10-hydroxy-camptothecin (SN38)

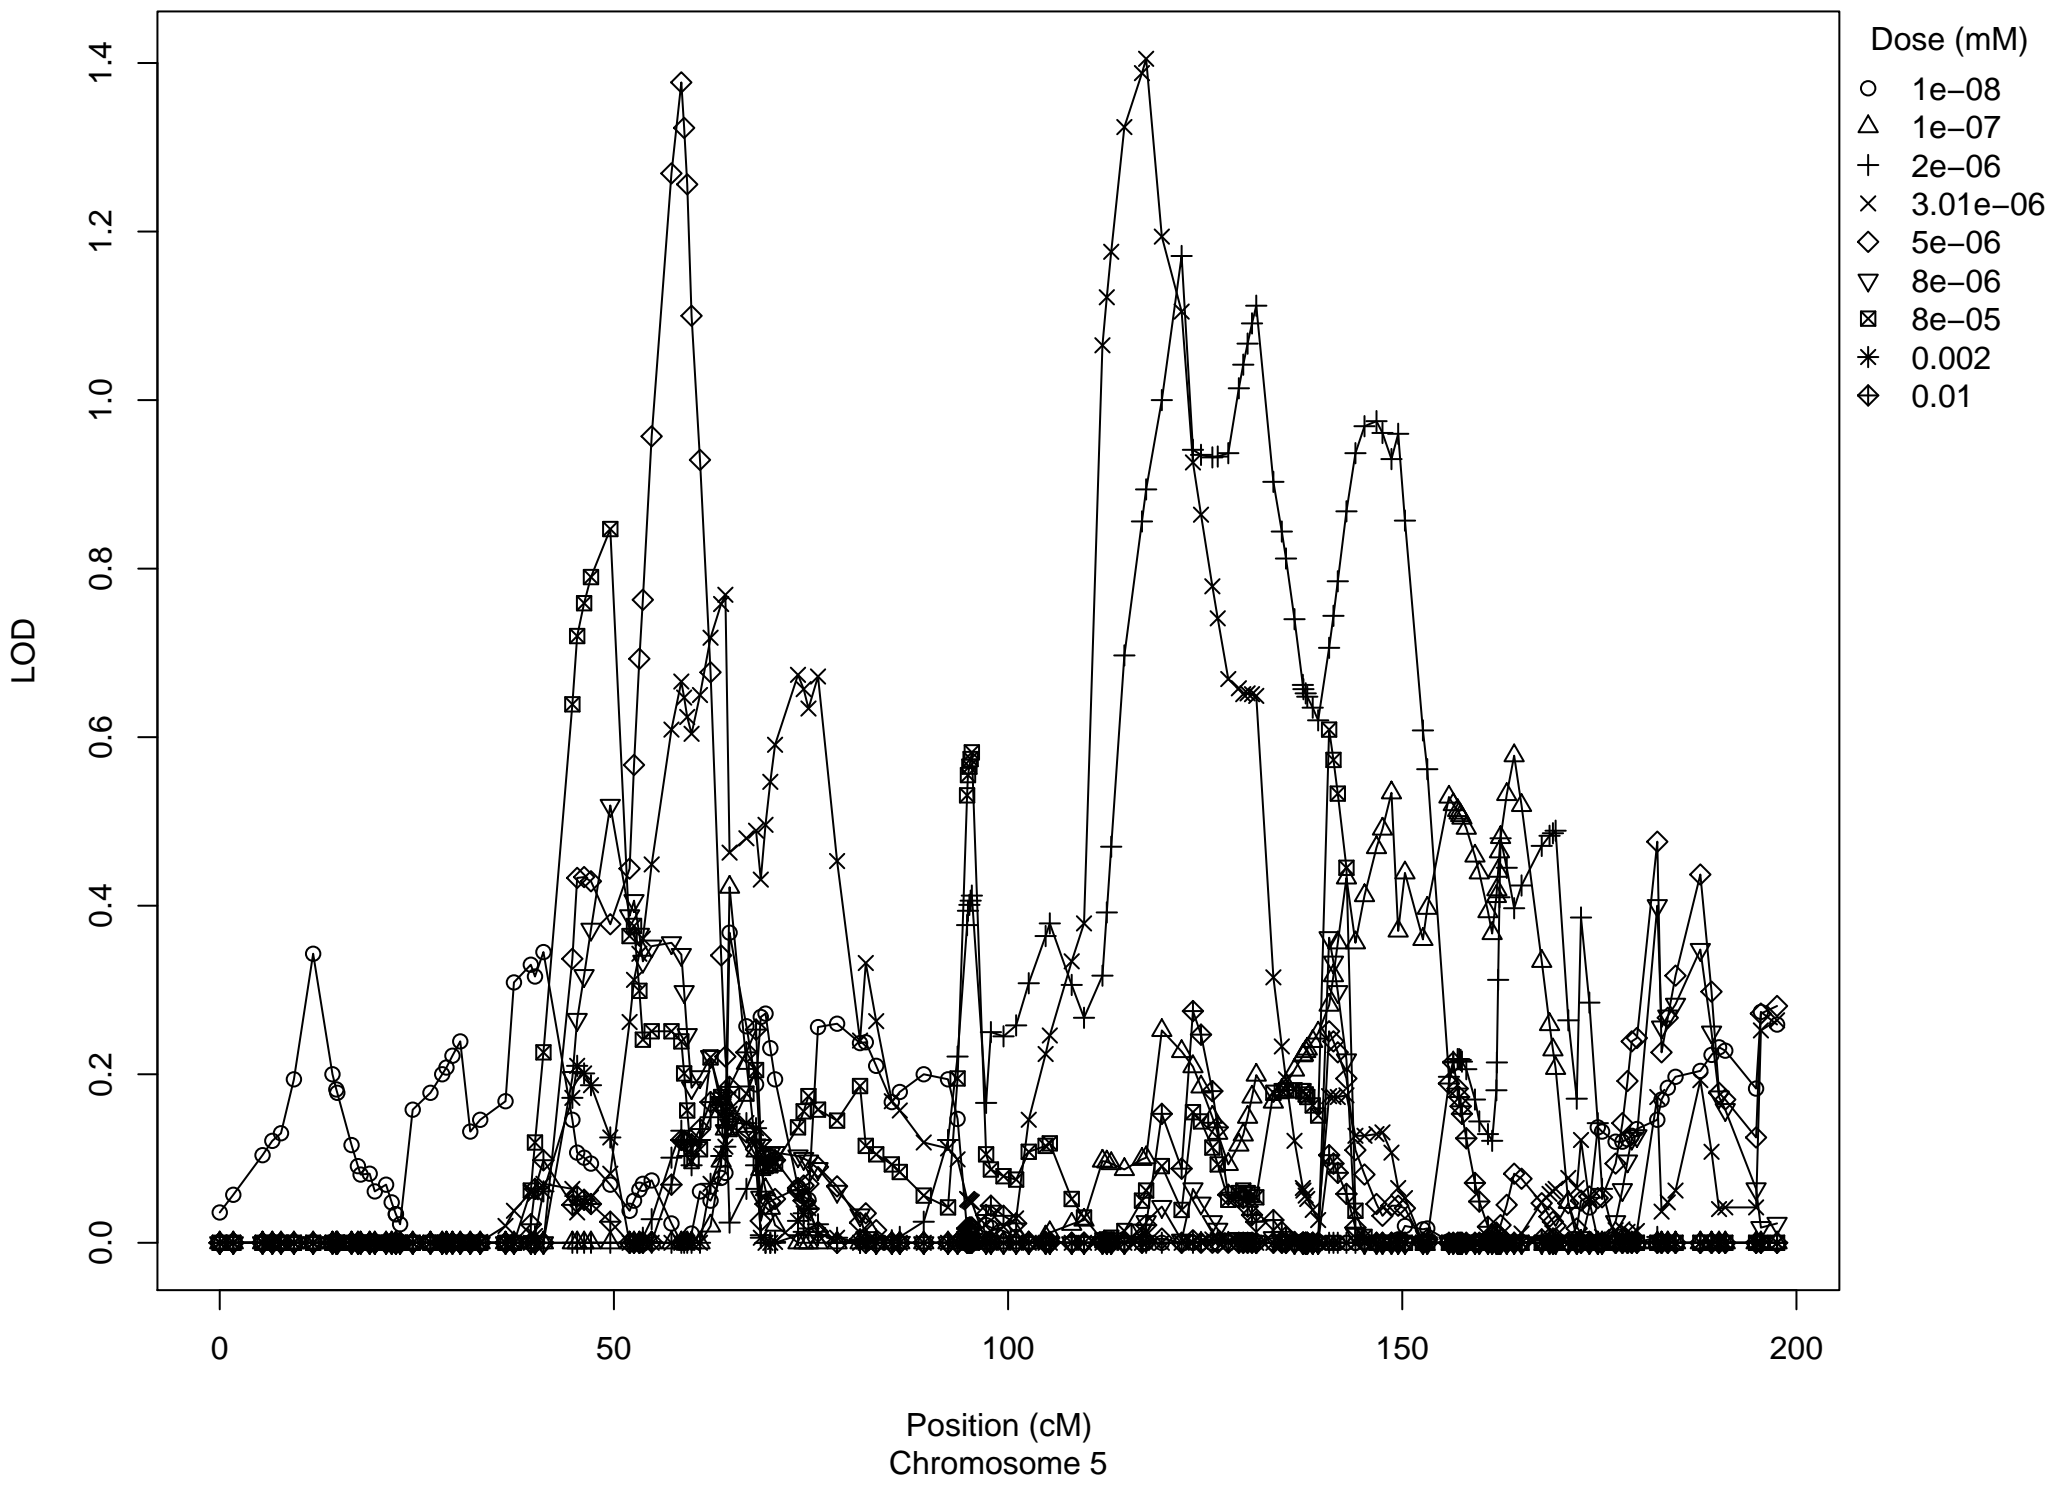

# 7-ethyl-10-hydroxy-camptothecin (SN38)

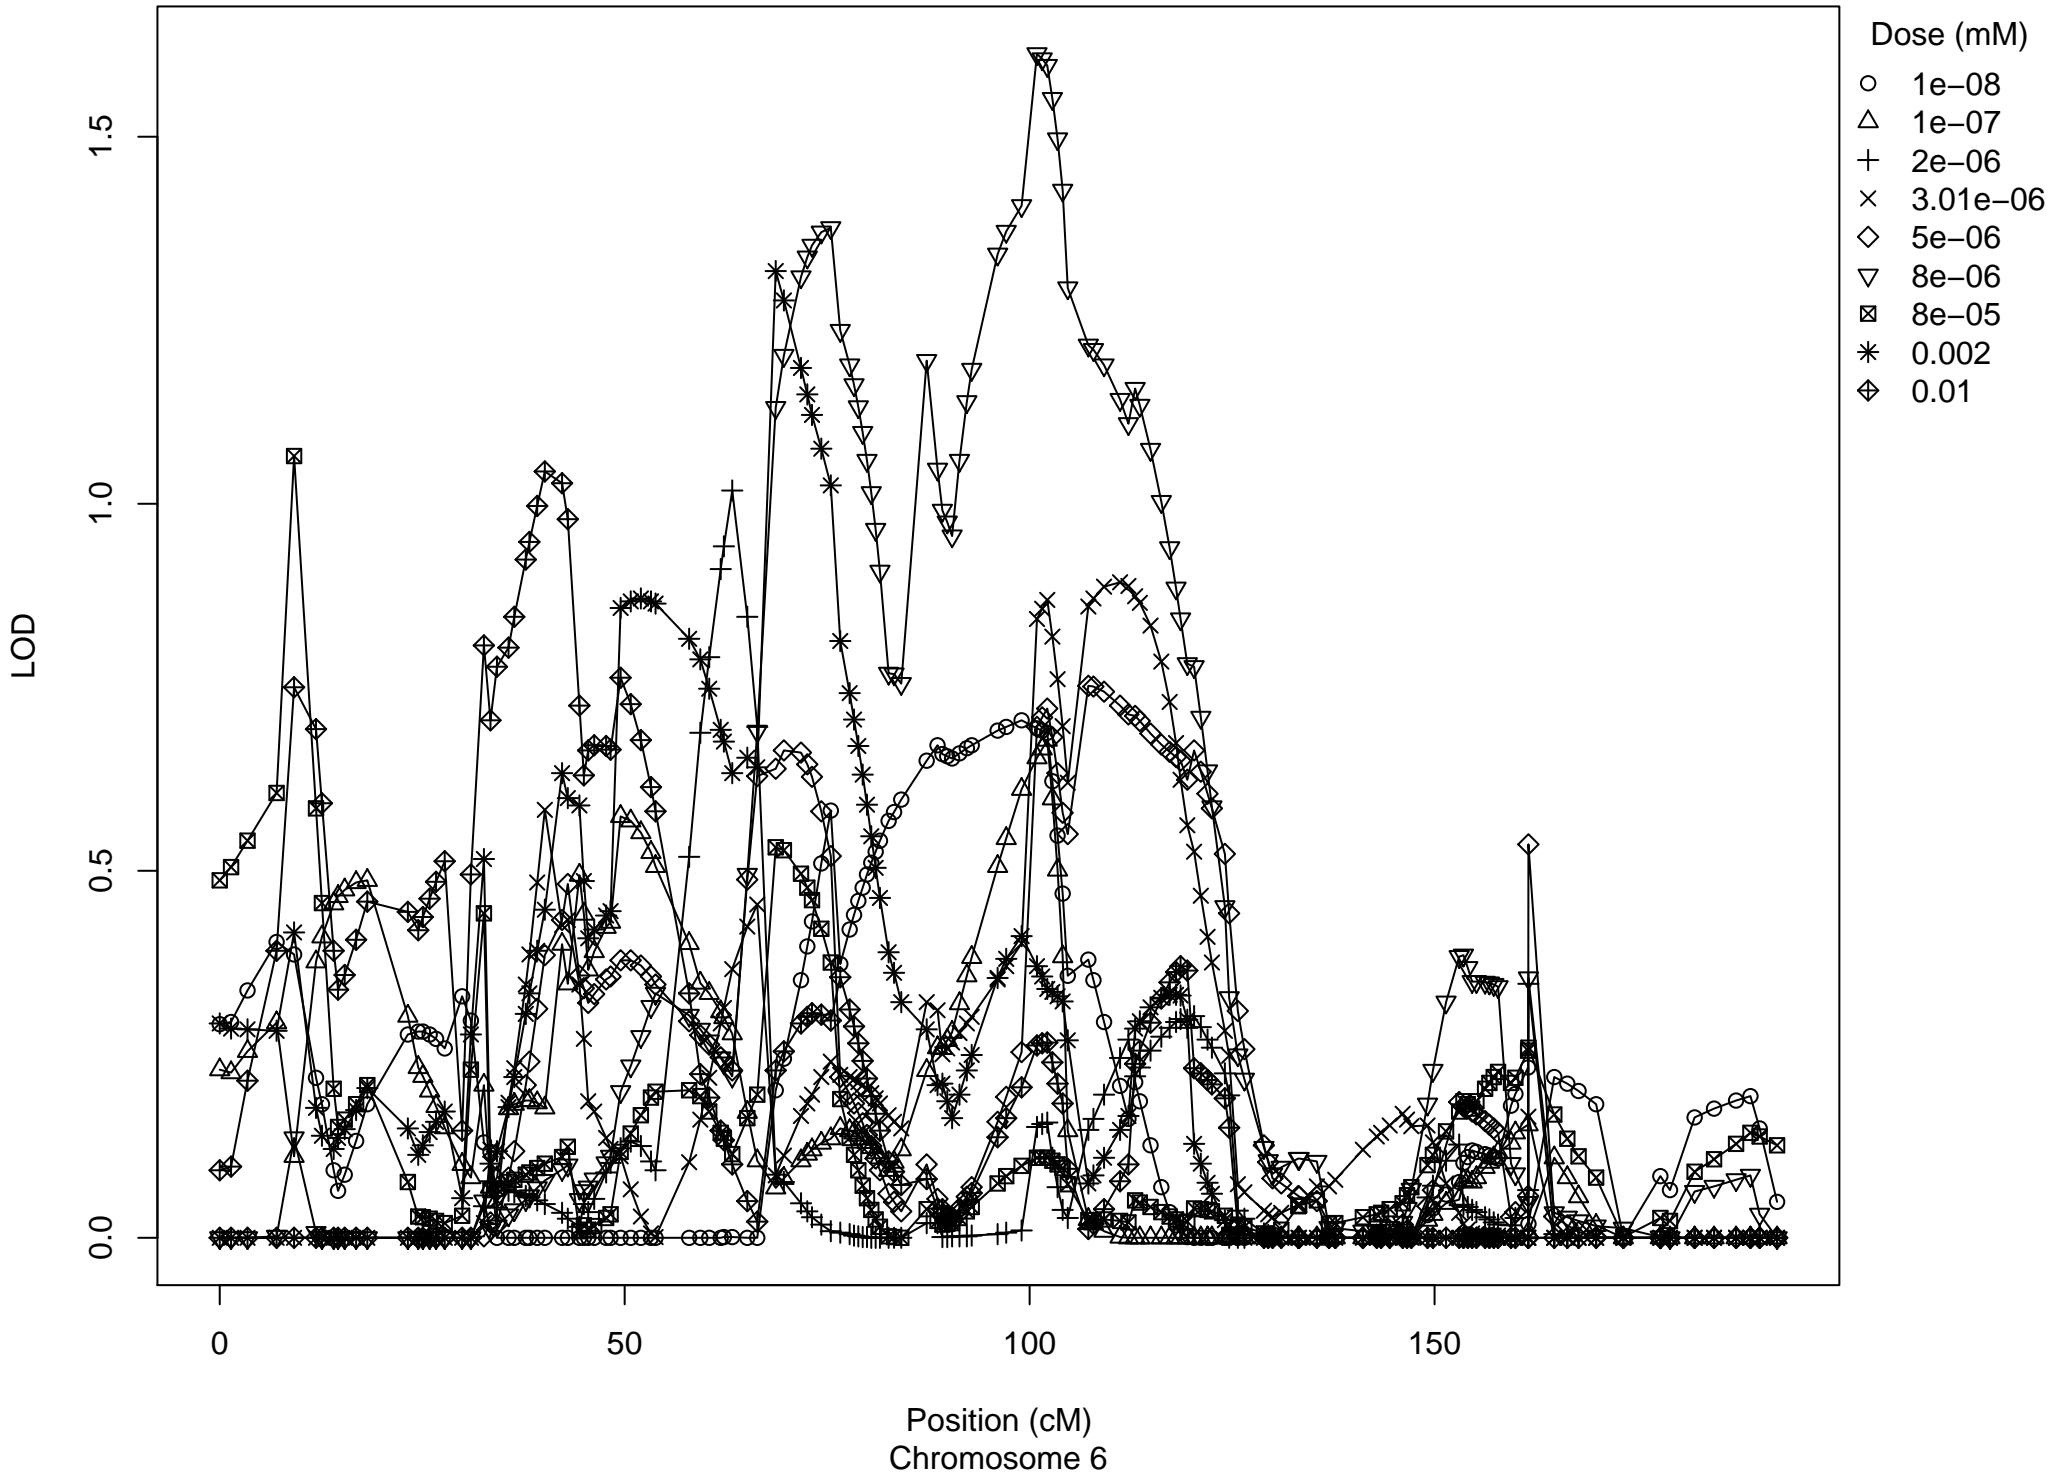

# 7-ethyl-10-hydroxy-camptothecin (SN38)

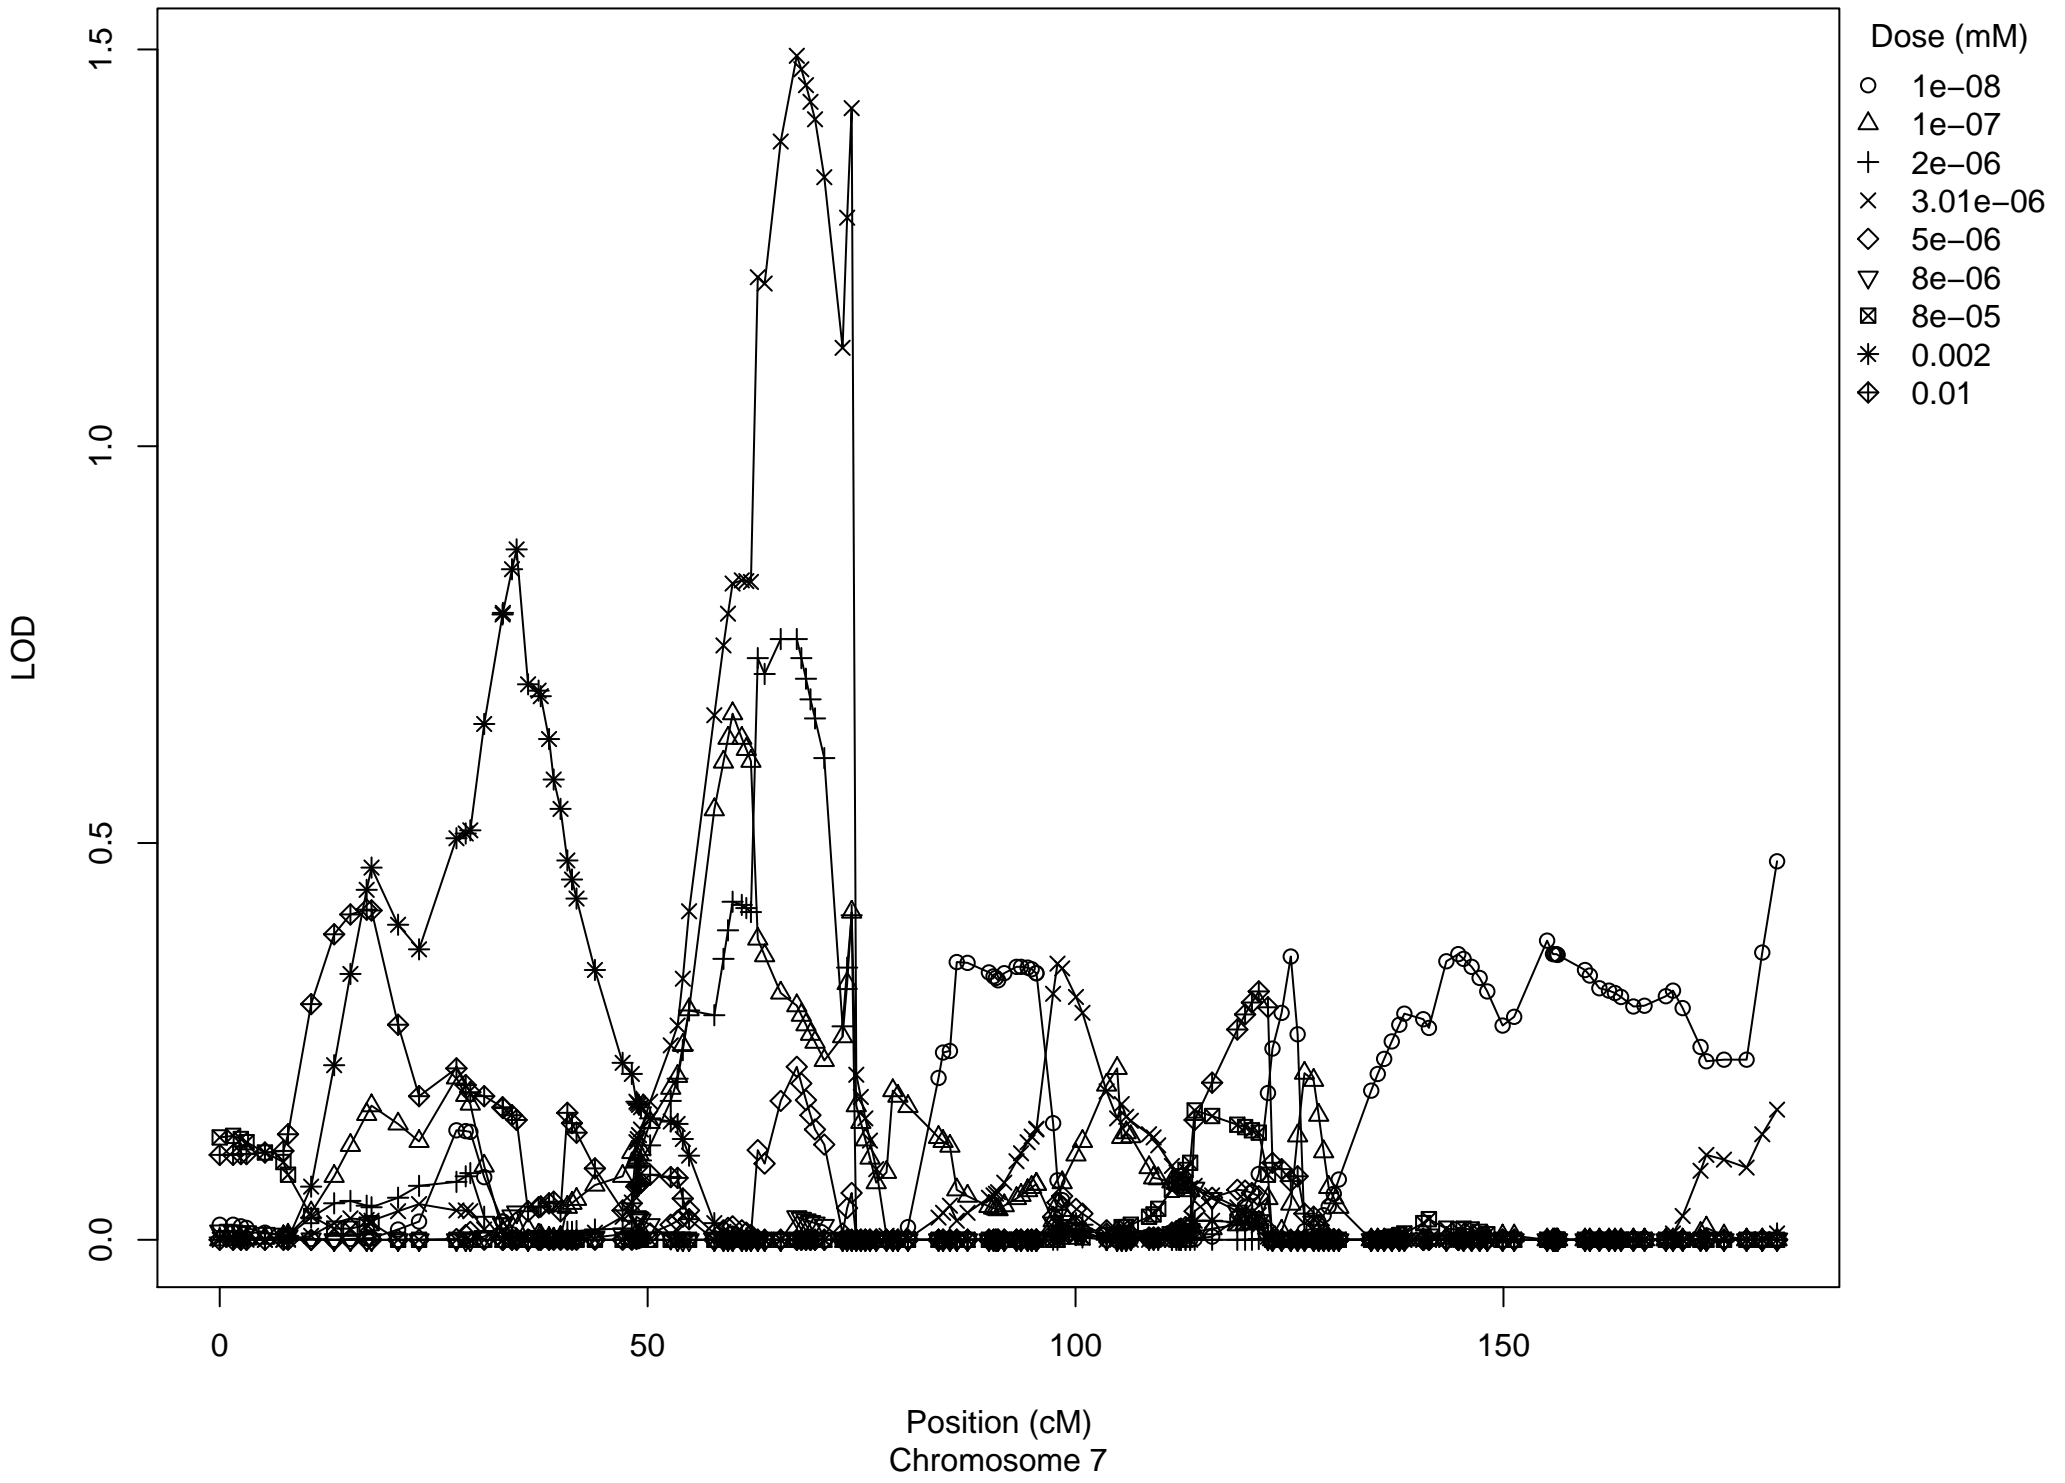





# 7-ethyl-10-hydroxy-camptothecin (SN38)

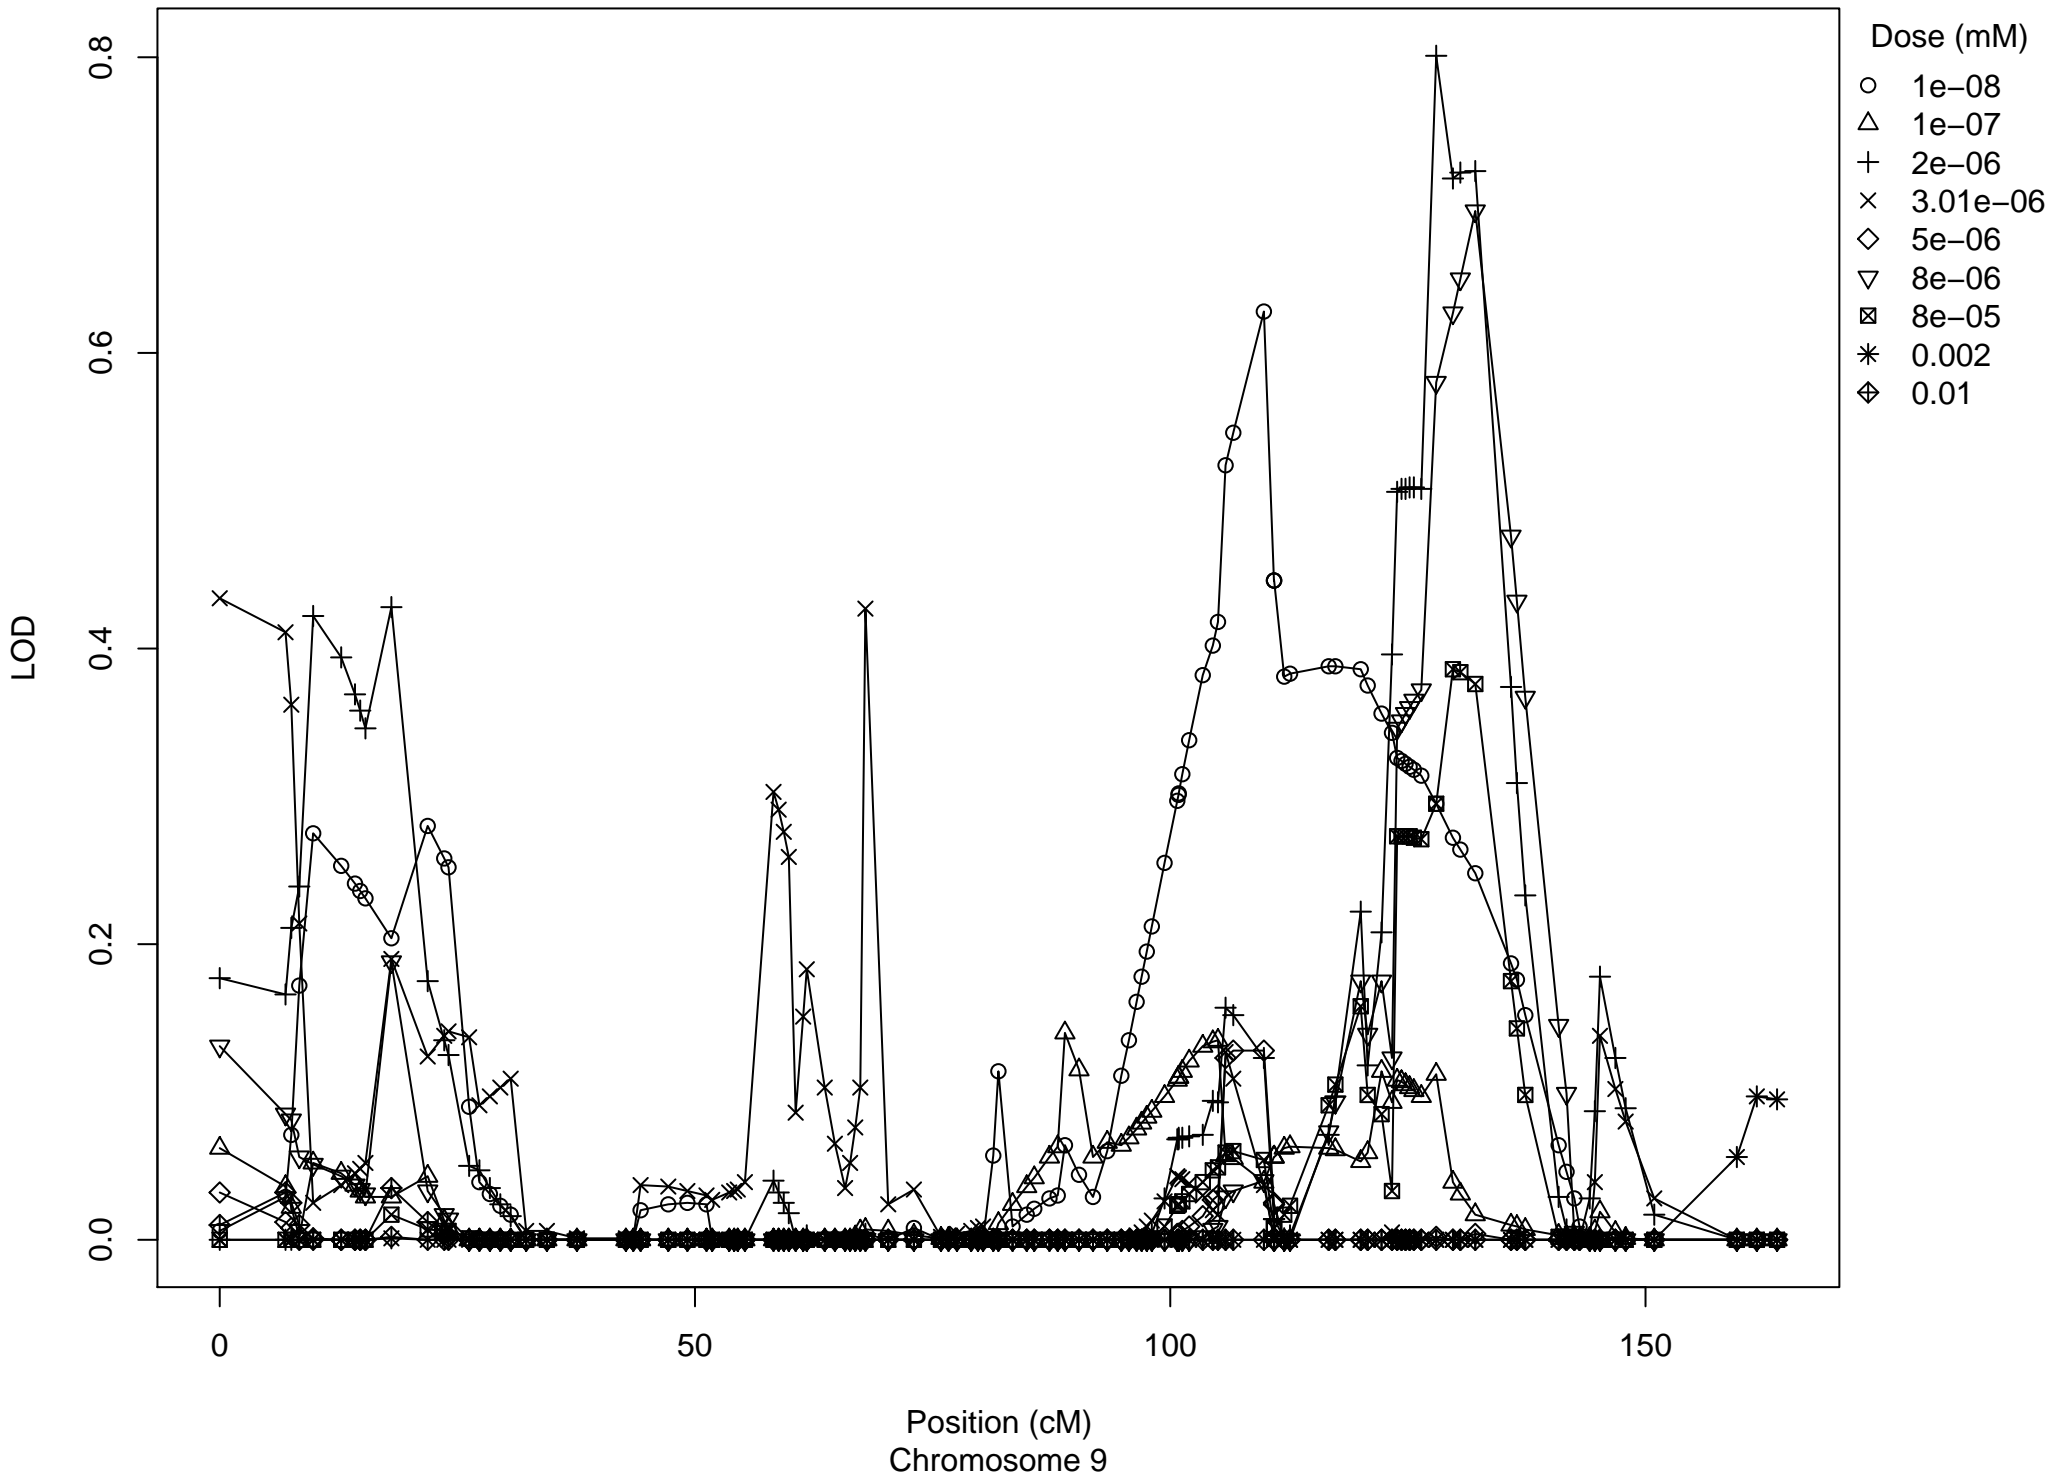

# 7-ethyl-10-hydroxy-camptothecin (SN38)

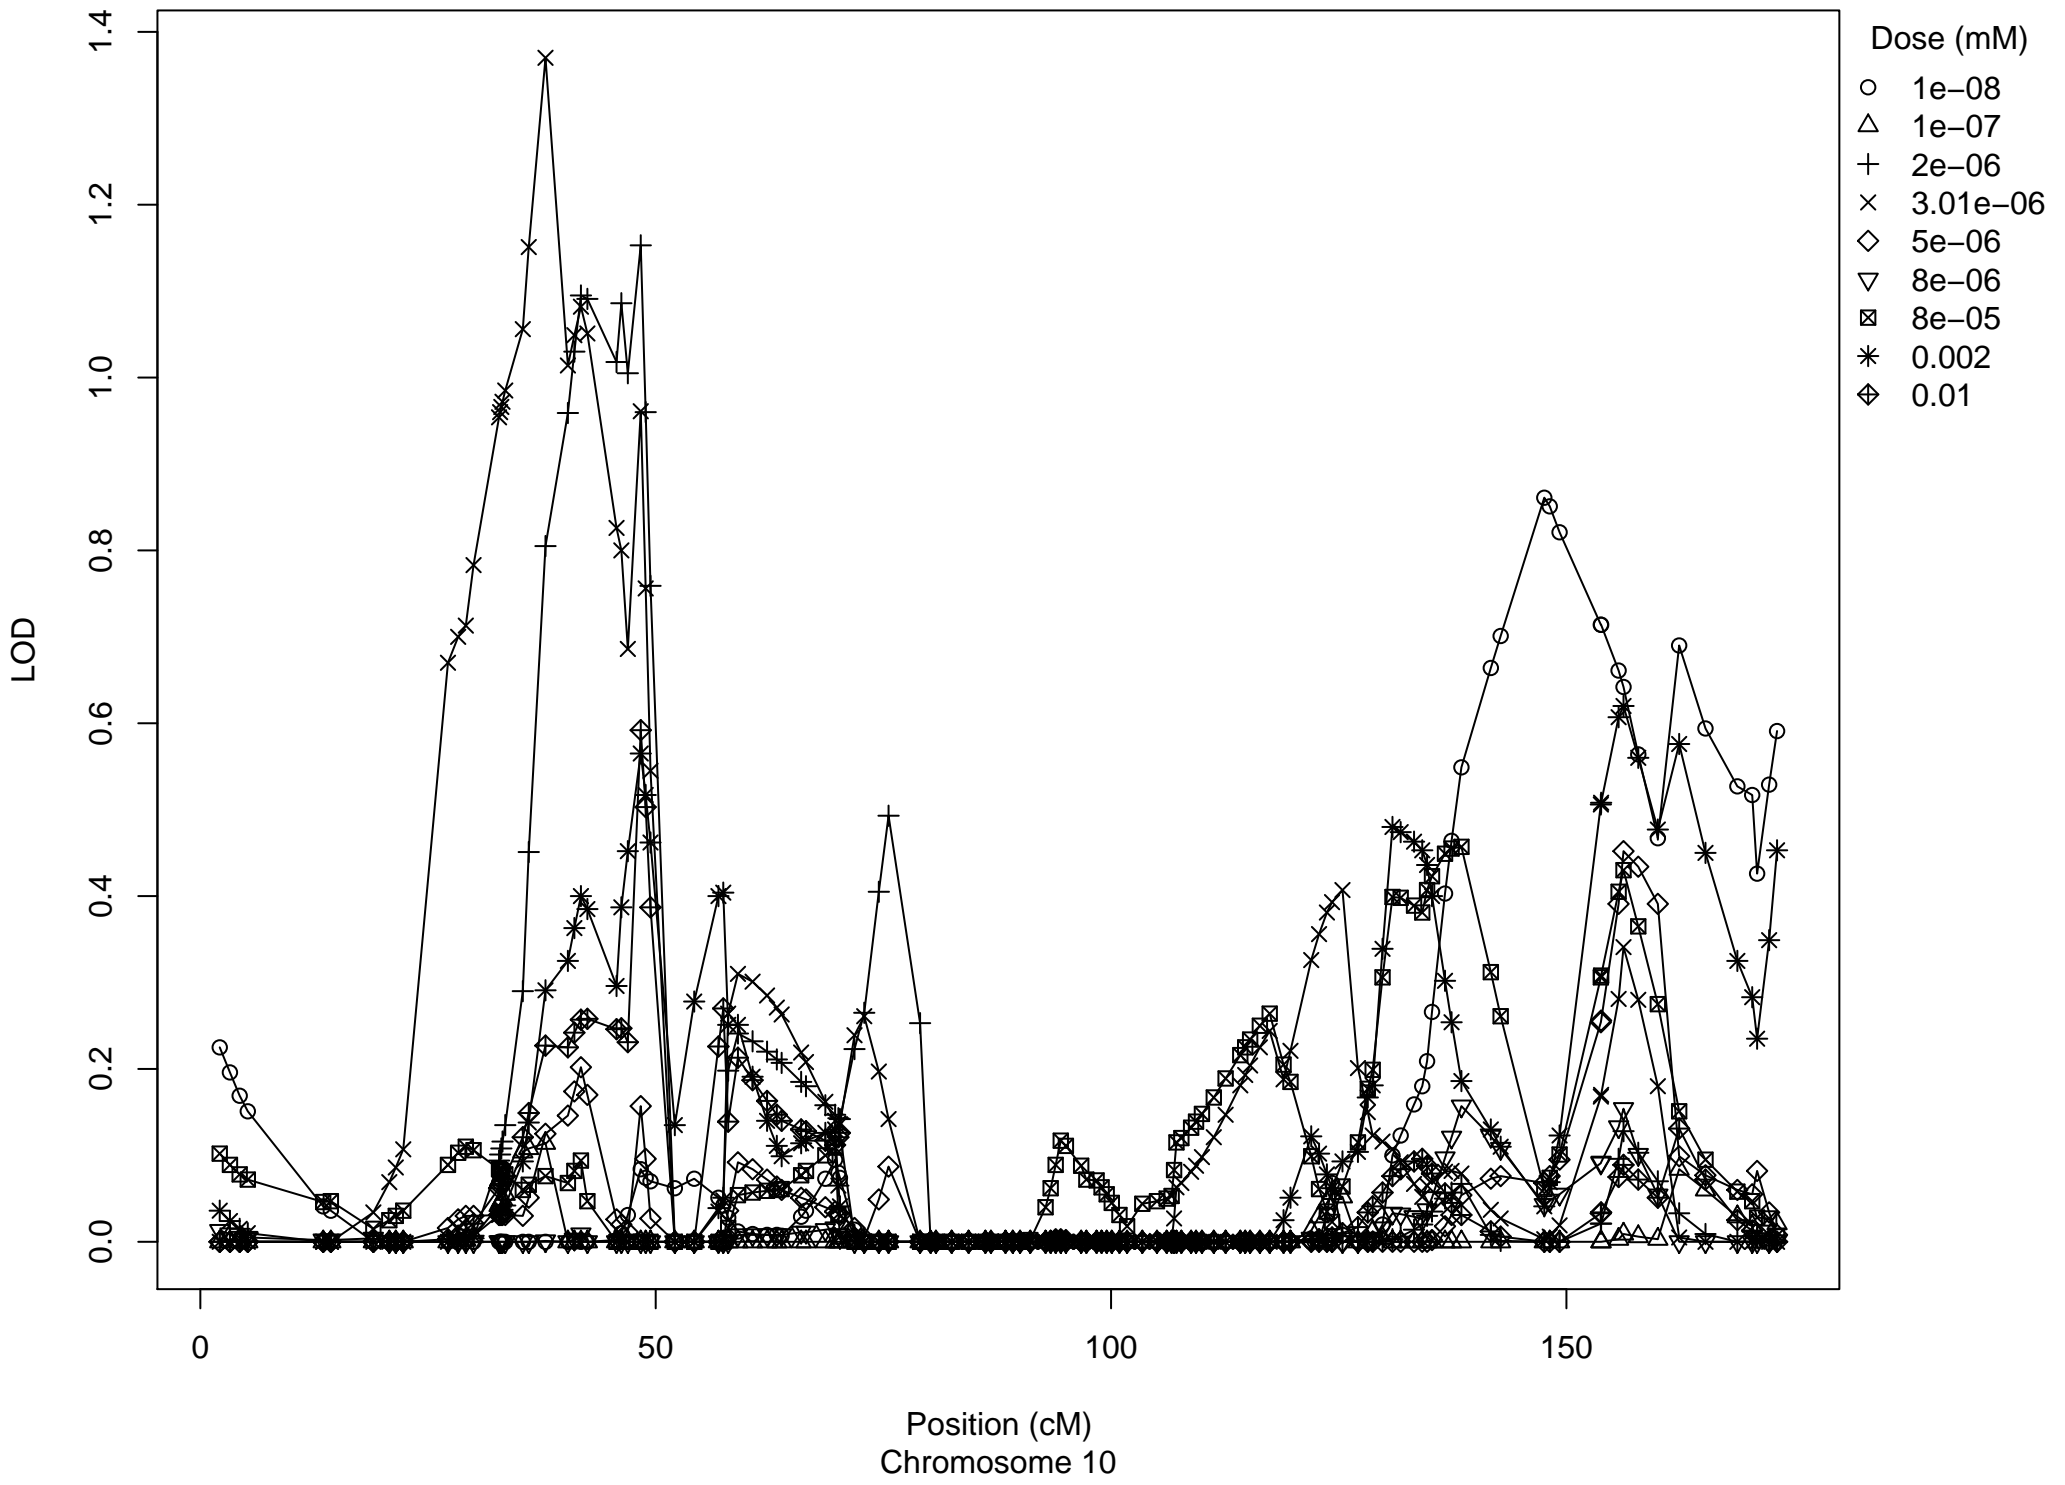

# 7-ethyl-10-hydroxy-camptothecin (SN38)

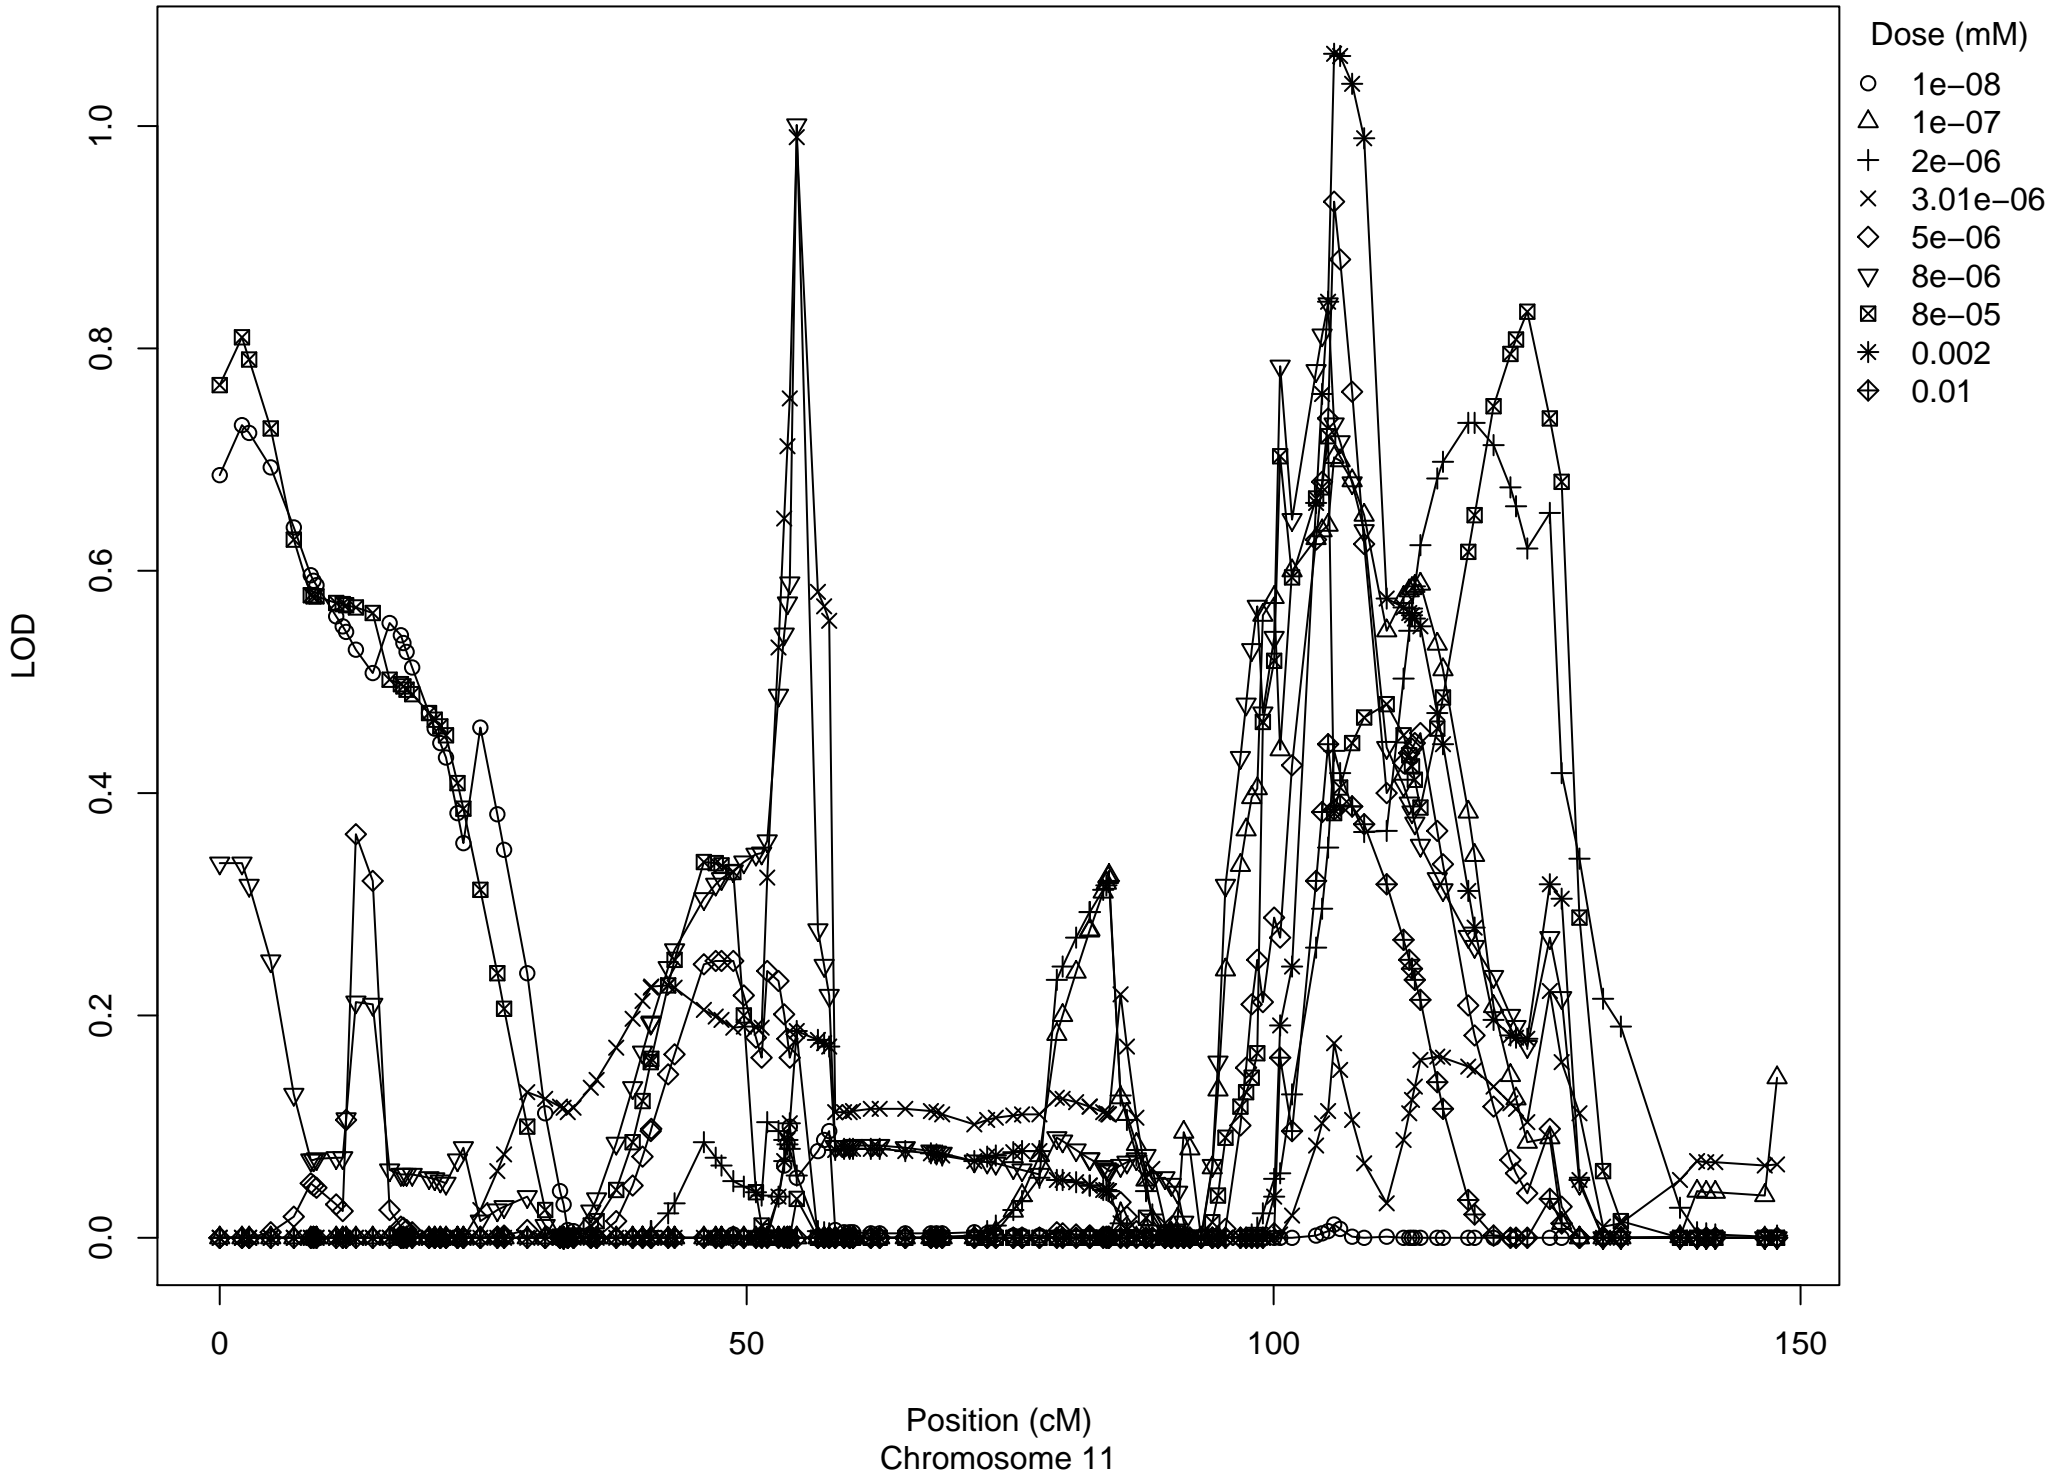

# 7-ethyl-10-hydroxy-camptothecin (SN38)

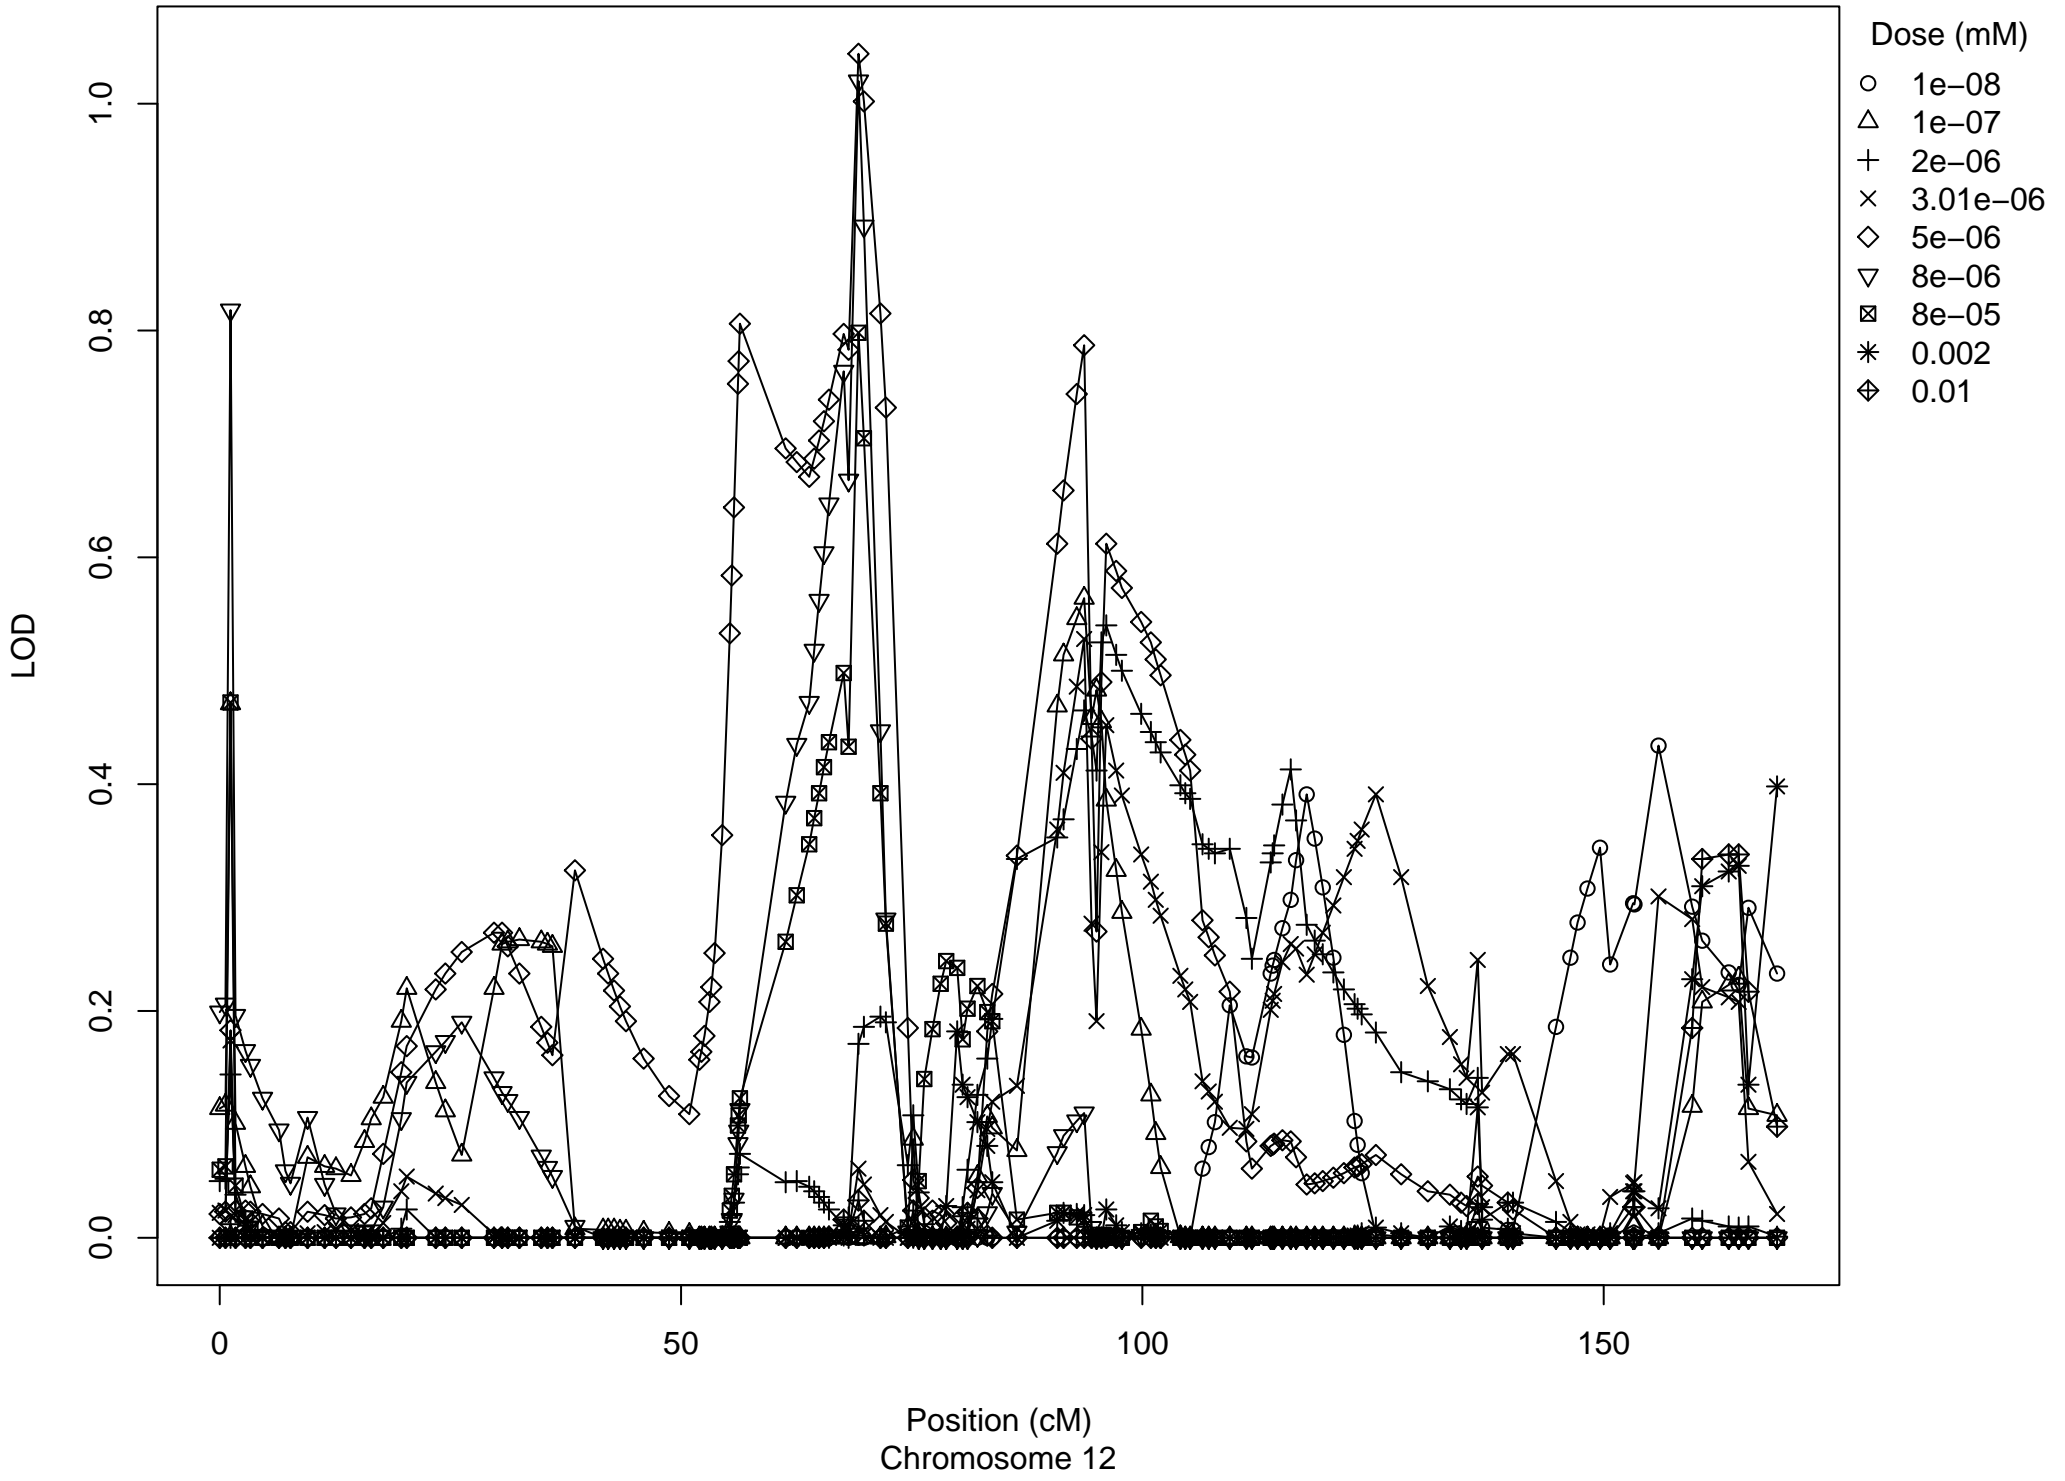

# 7-ethyl-10-hydroxy-camptothecin (SN38)

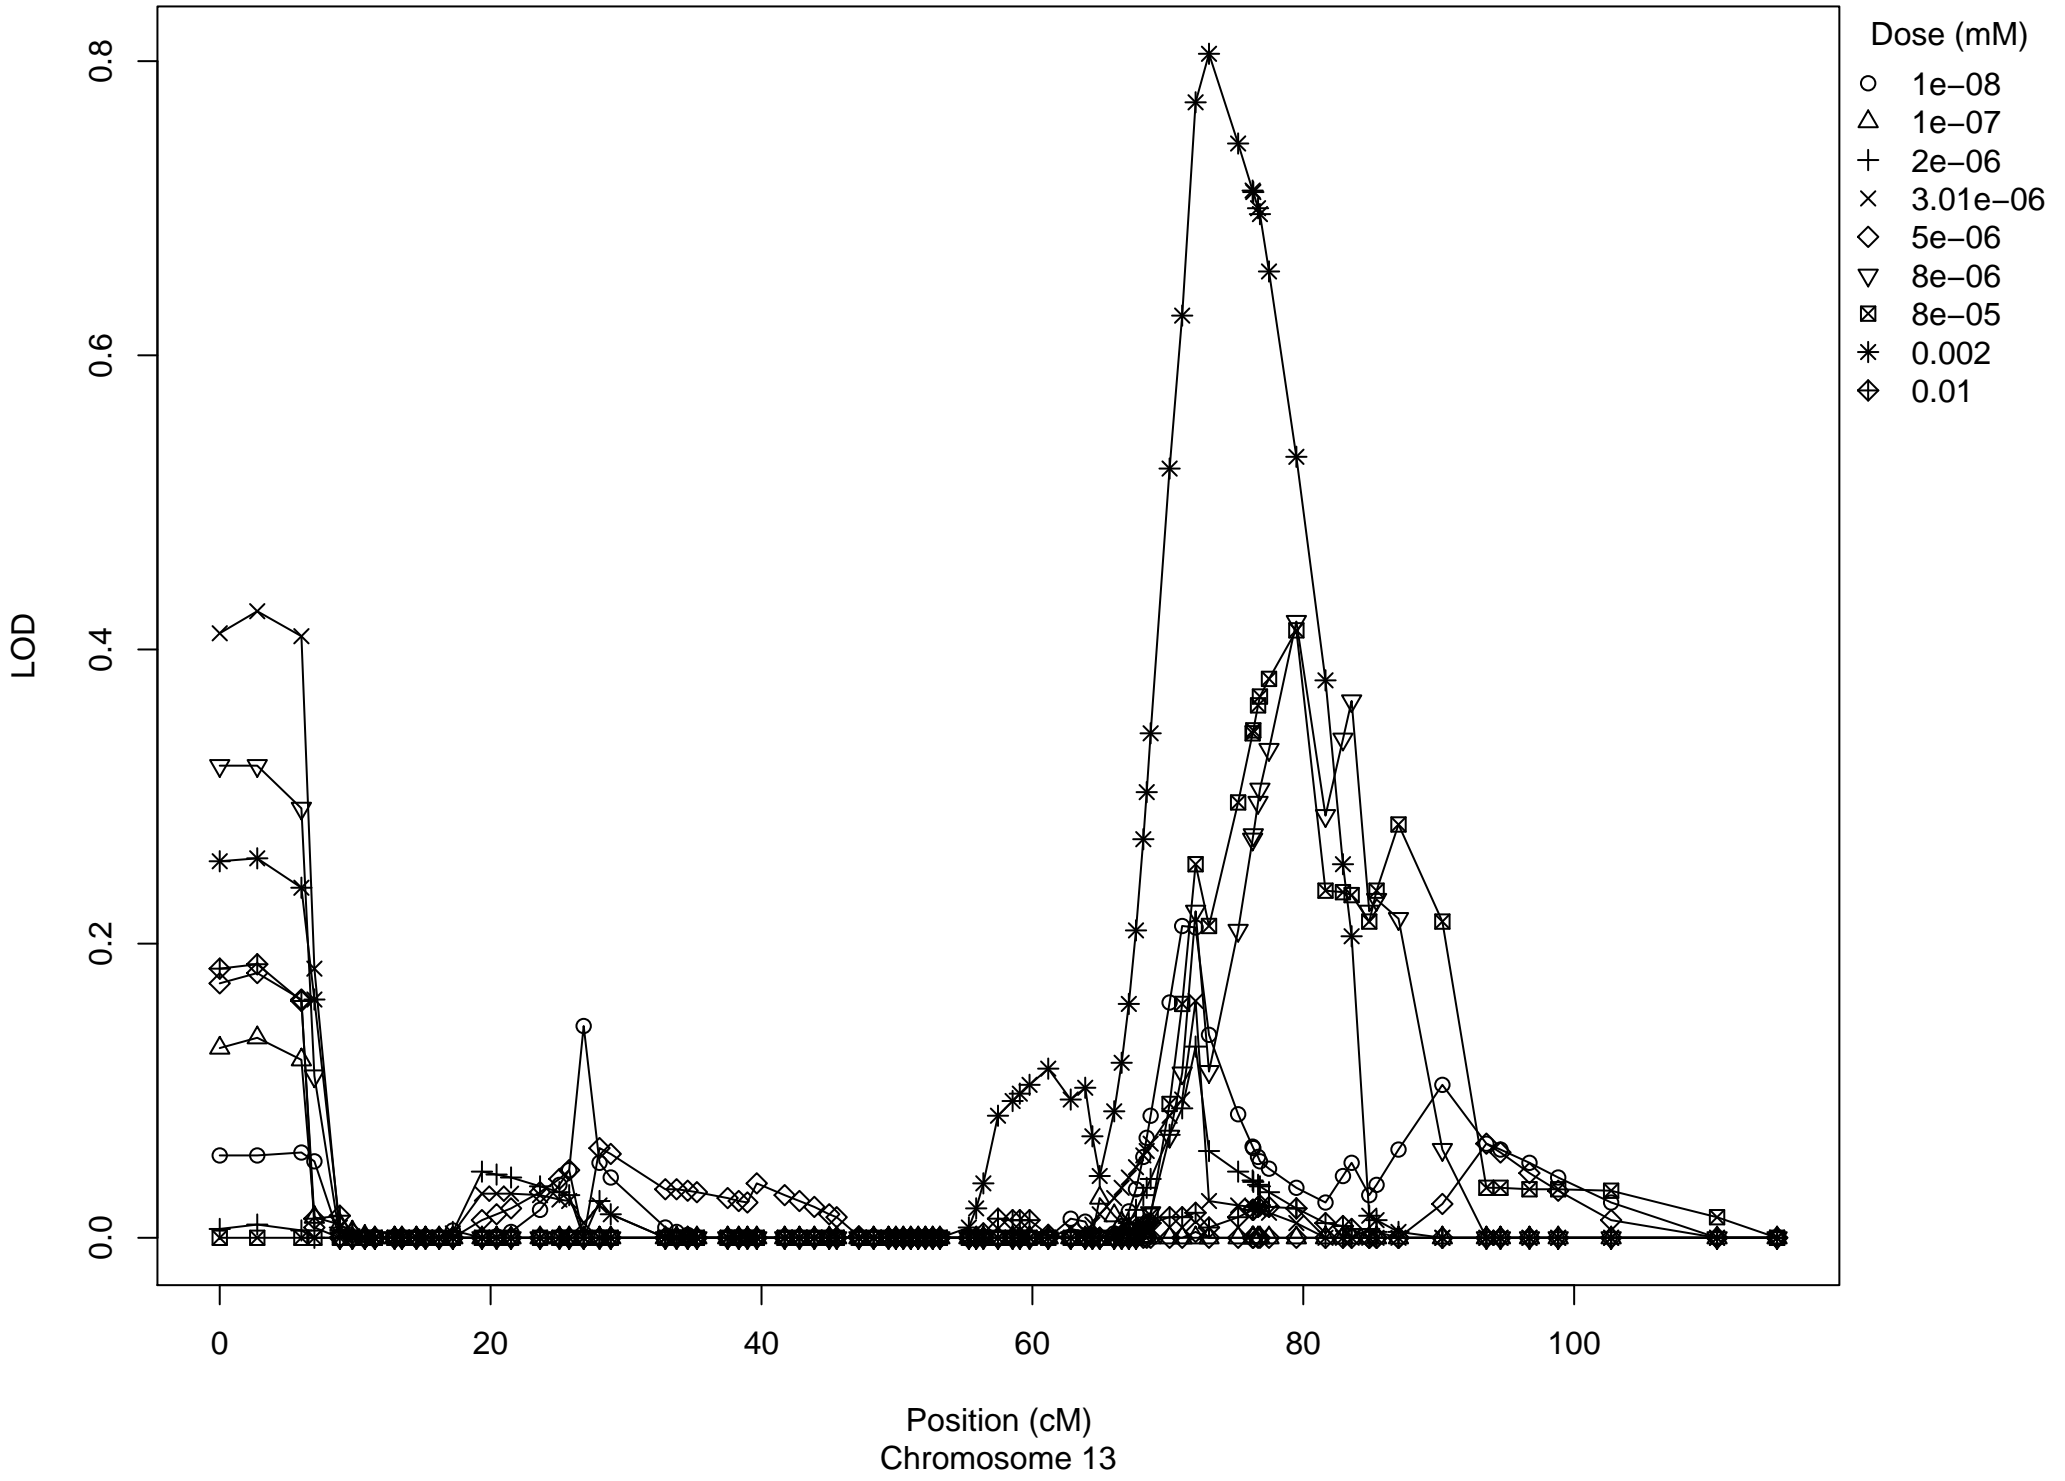

# 7-ethyl-10-hydroxy-camptothecin (SN38)

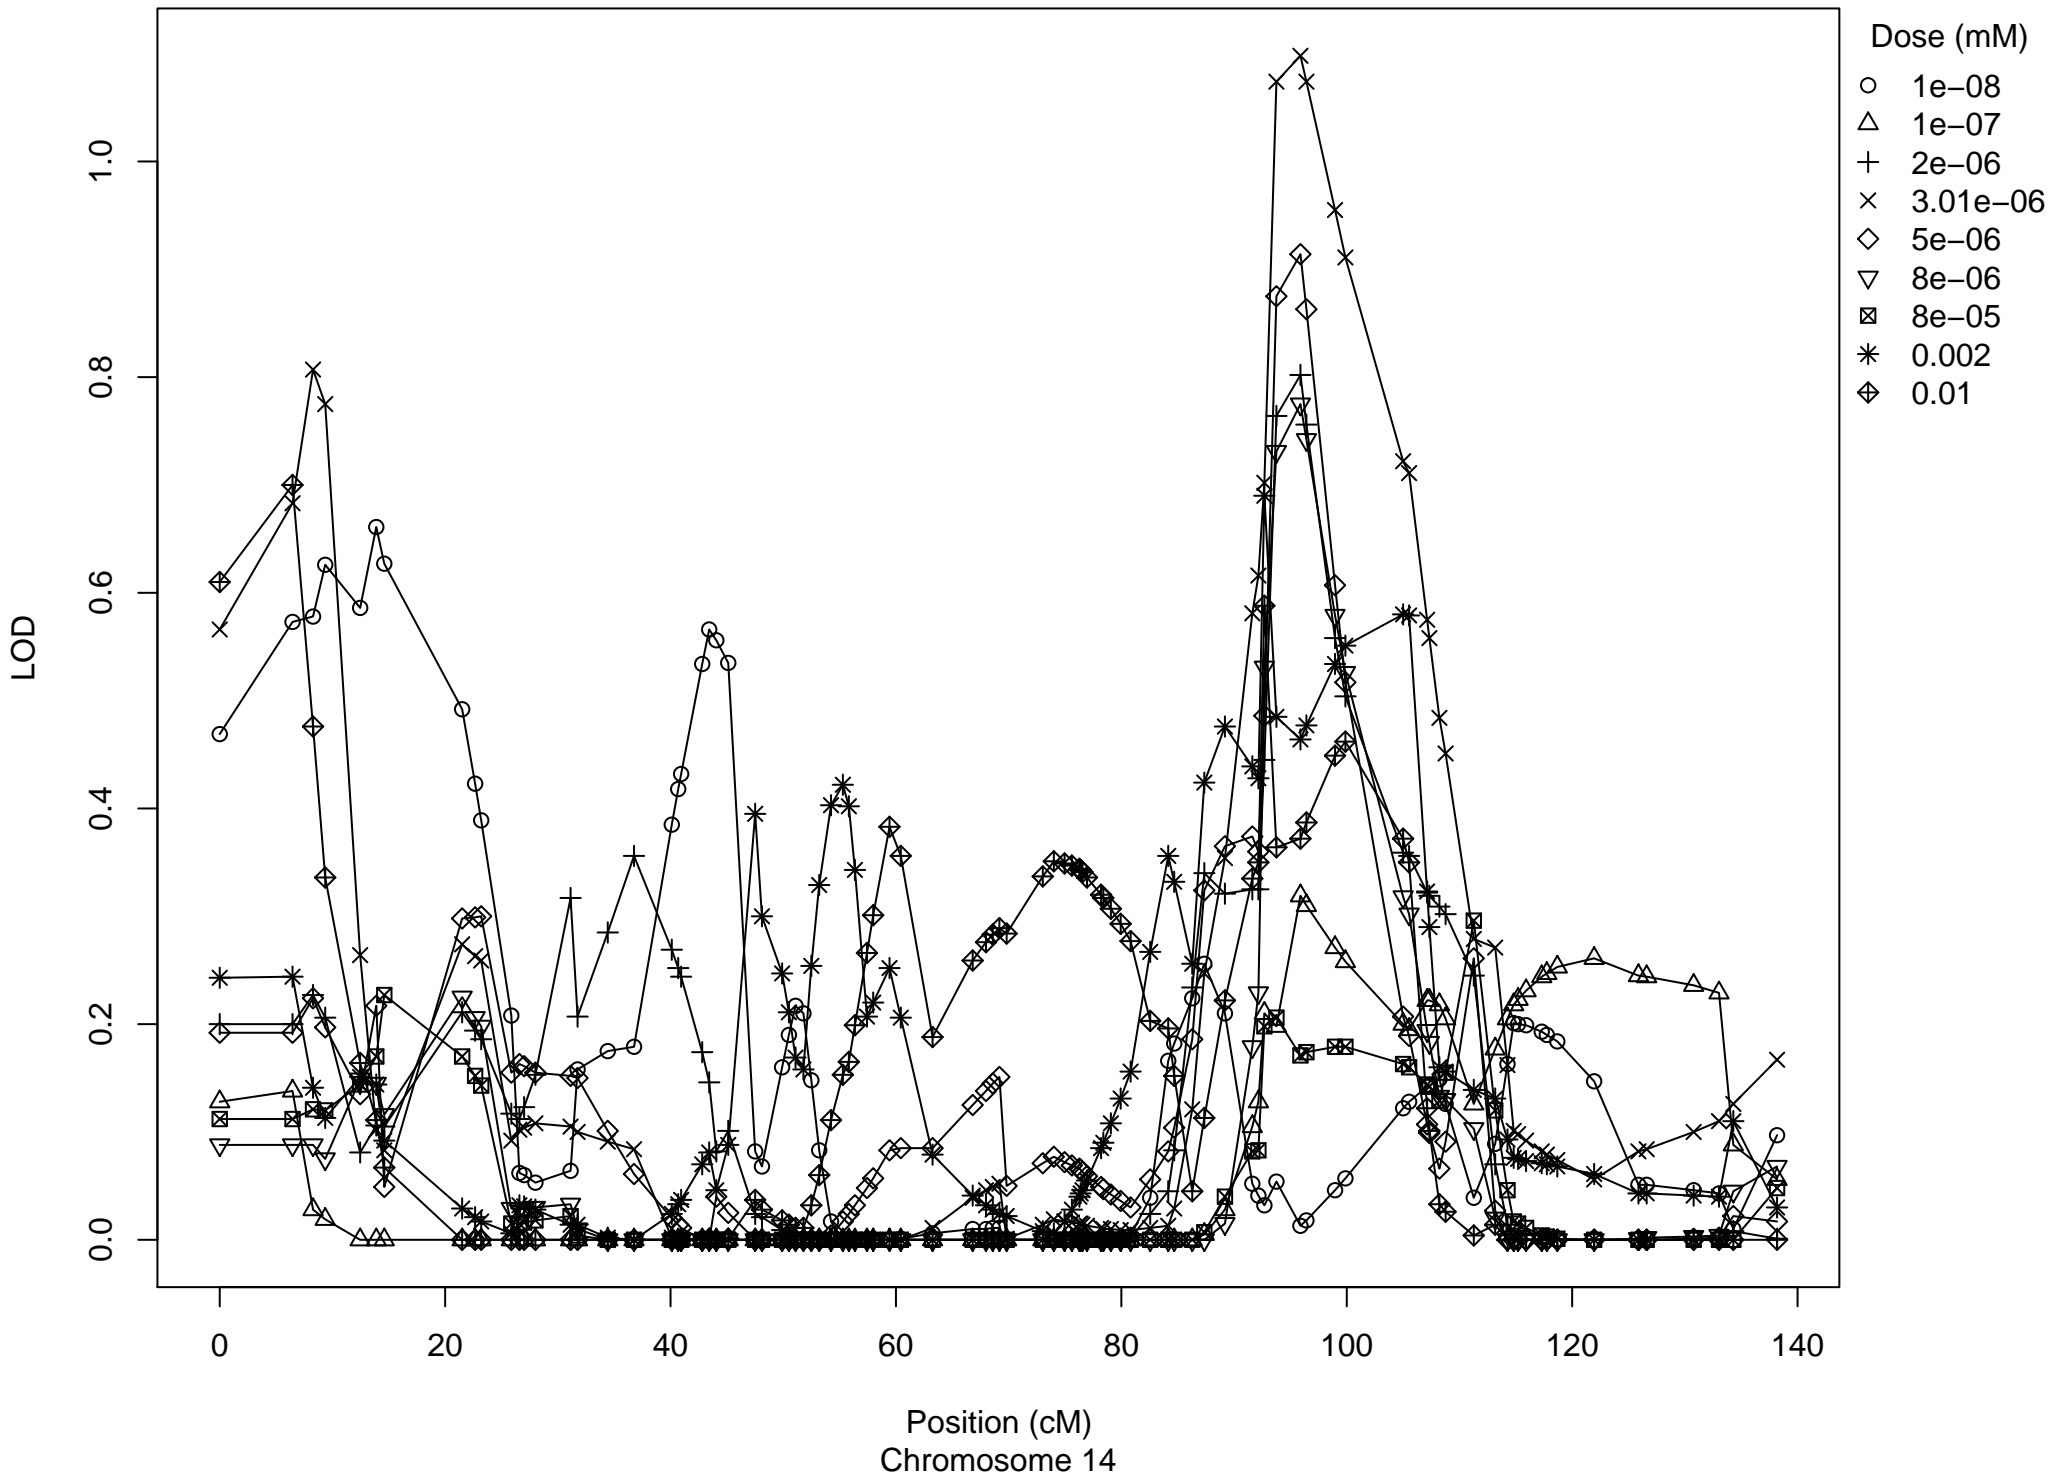







# 7-ethyl-10-hydroxy-camptothecin (SN38)

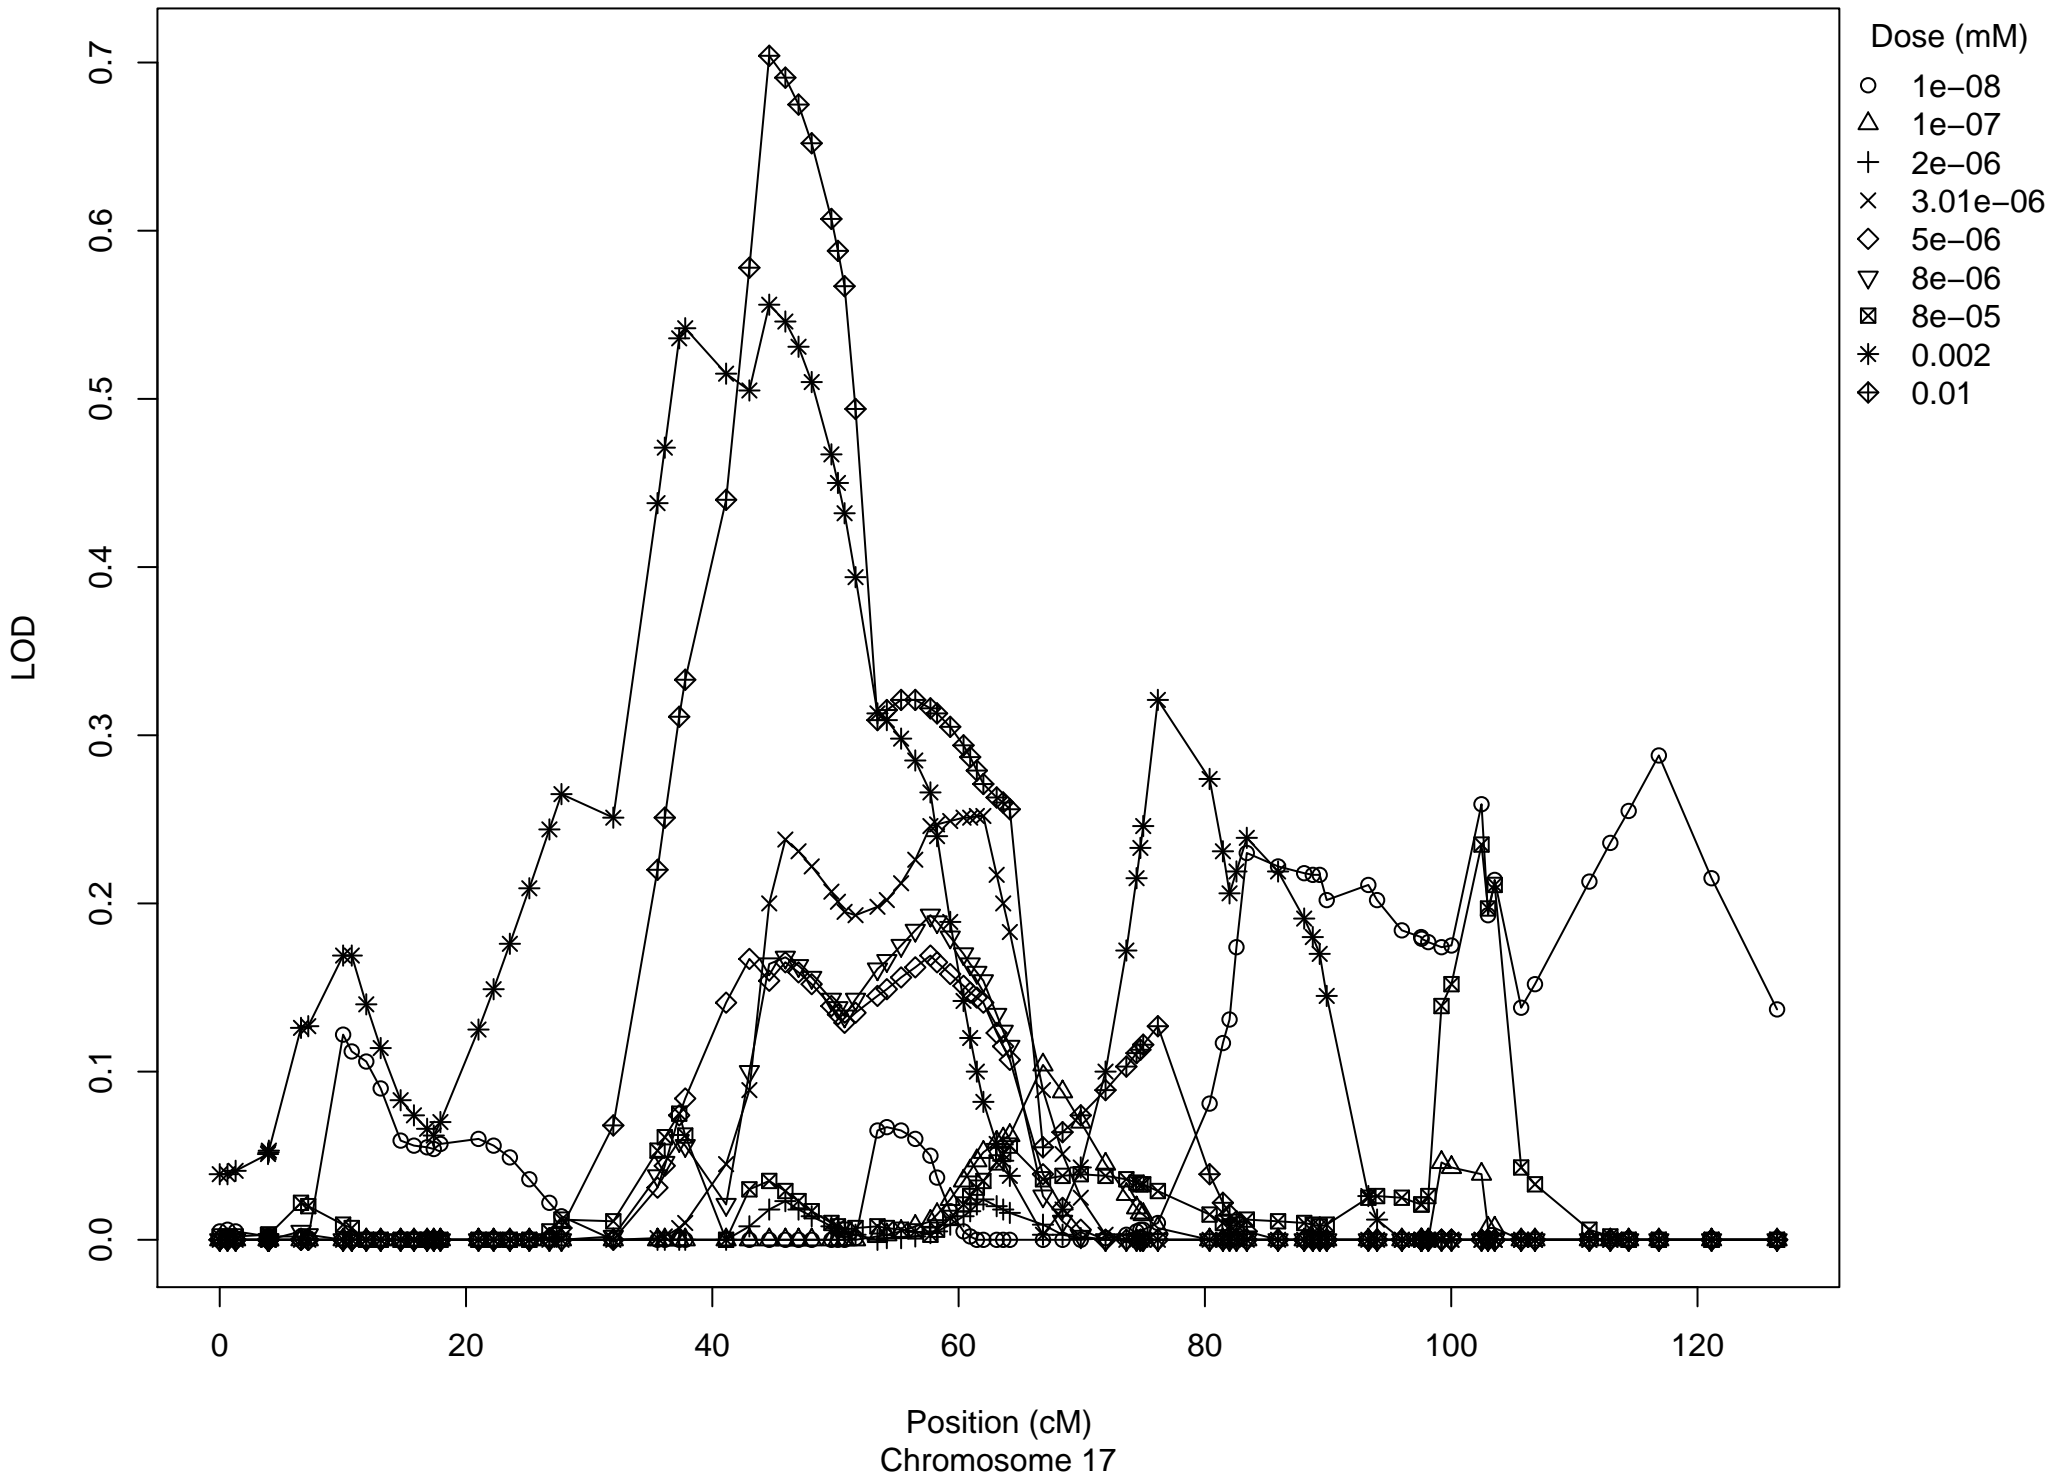

# 7-ethyl-10-hydroxy-camptothecin (SN38)

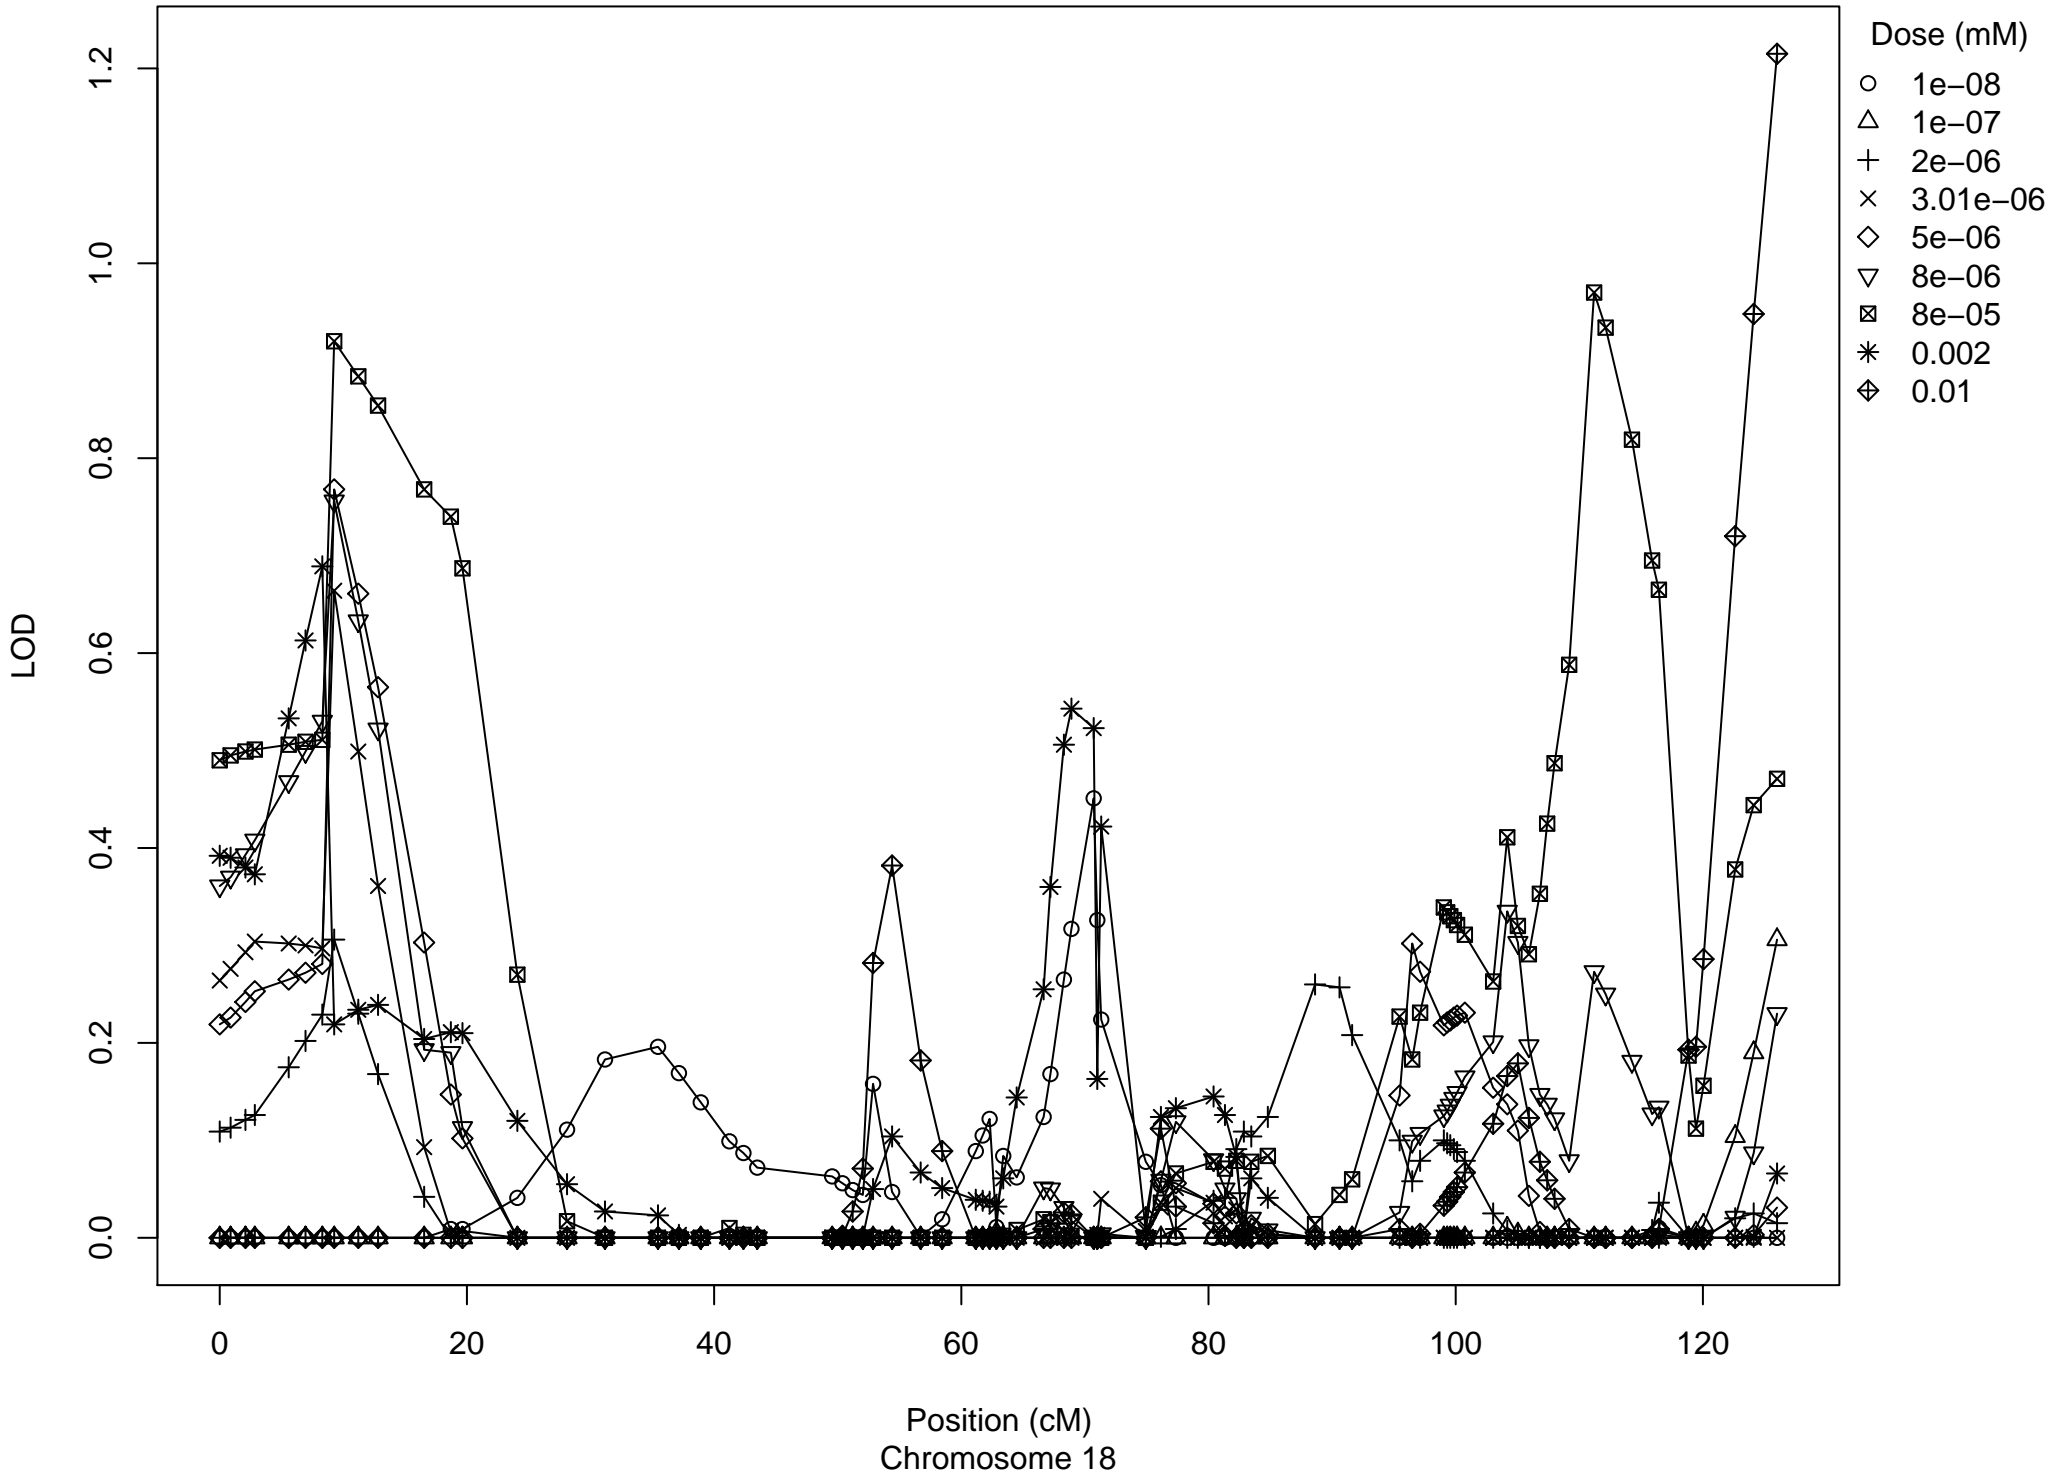



# 7-ethyl-10-hydroxy-camptothecin (SN38)

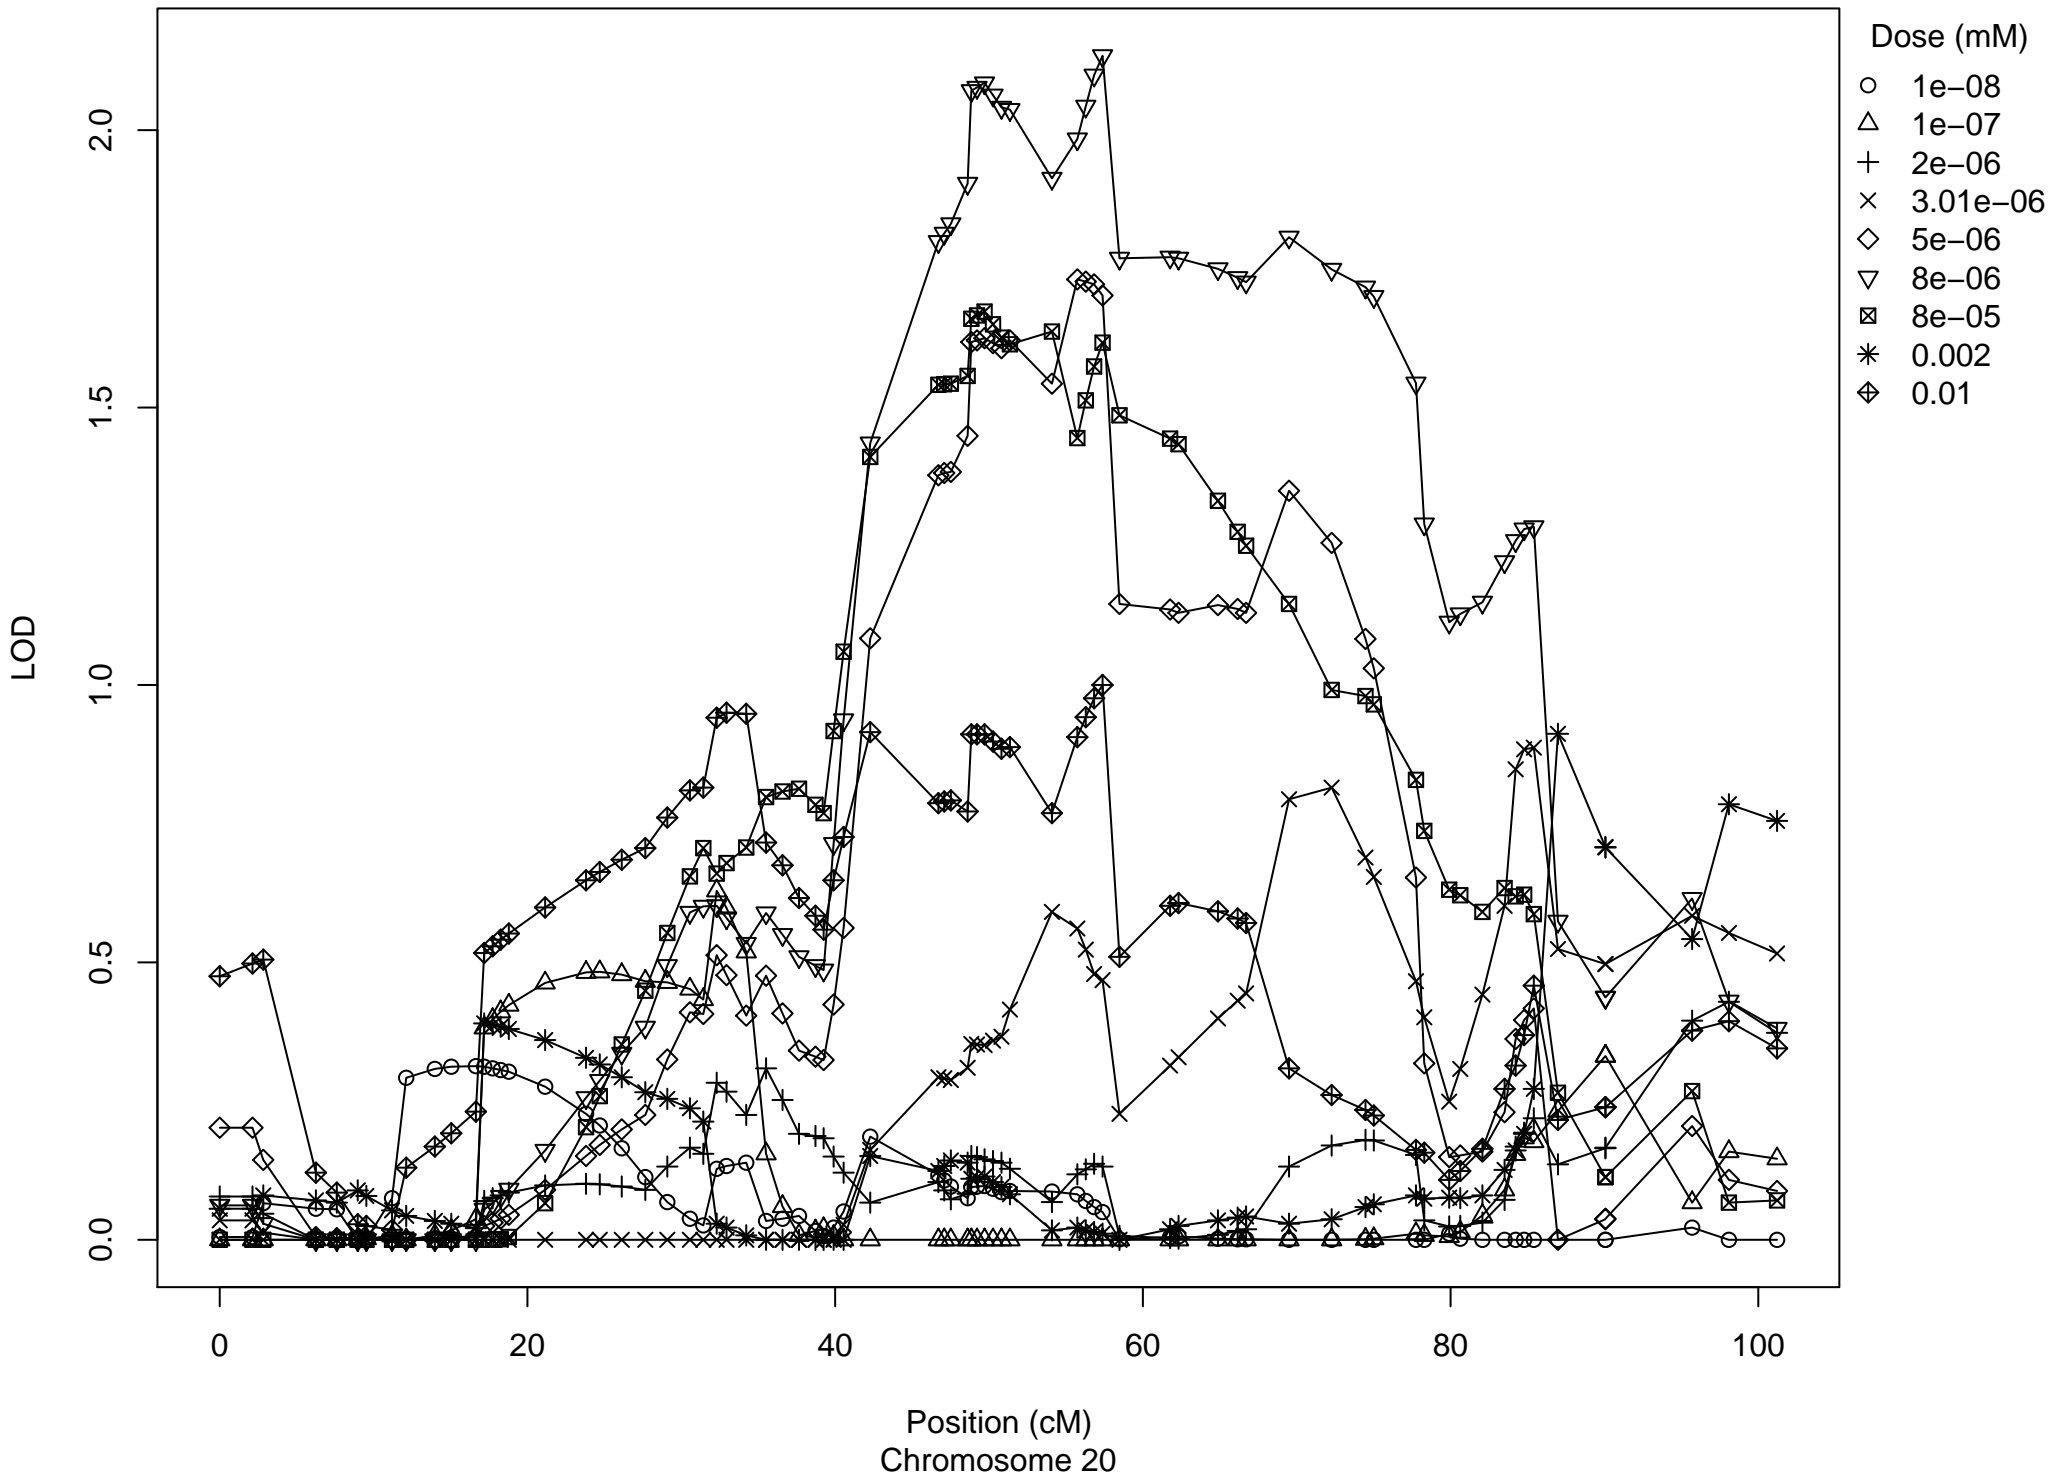

# 7-ethyl-10-hydroxy-camptothecin (SN38)

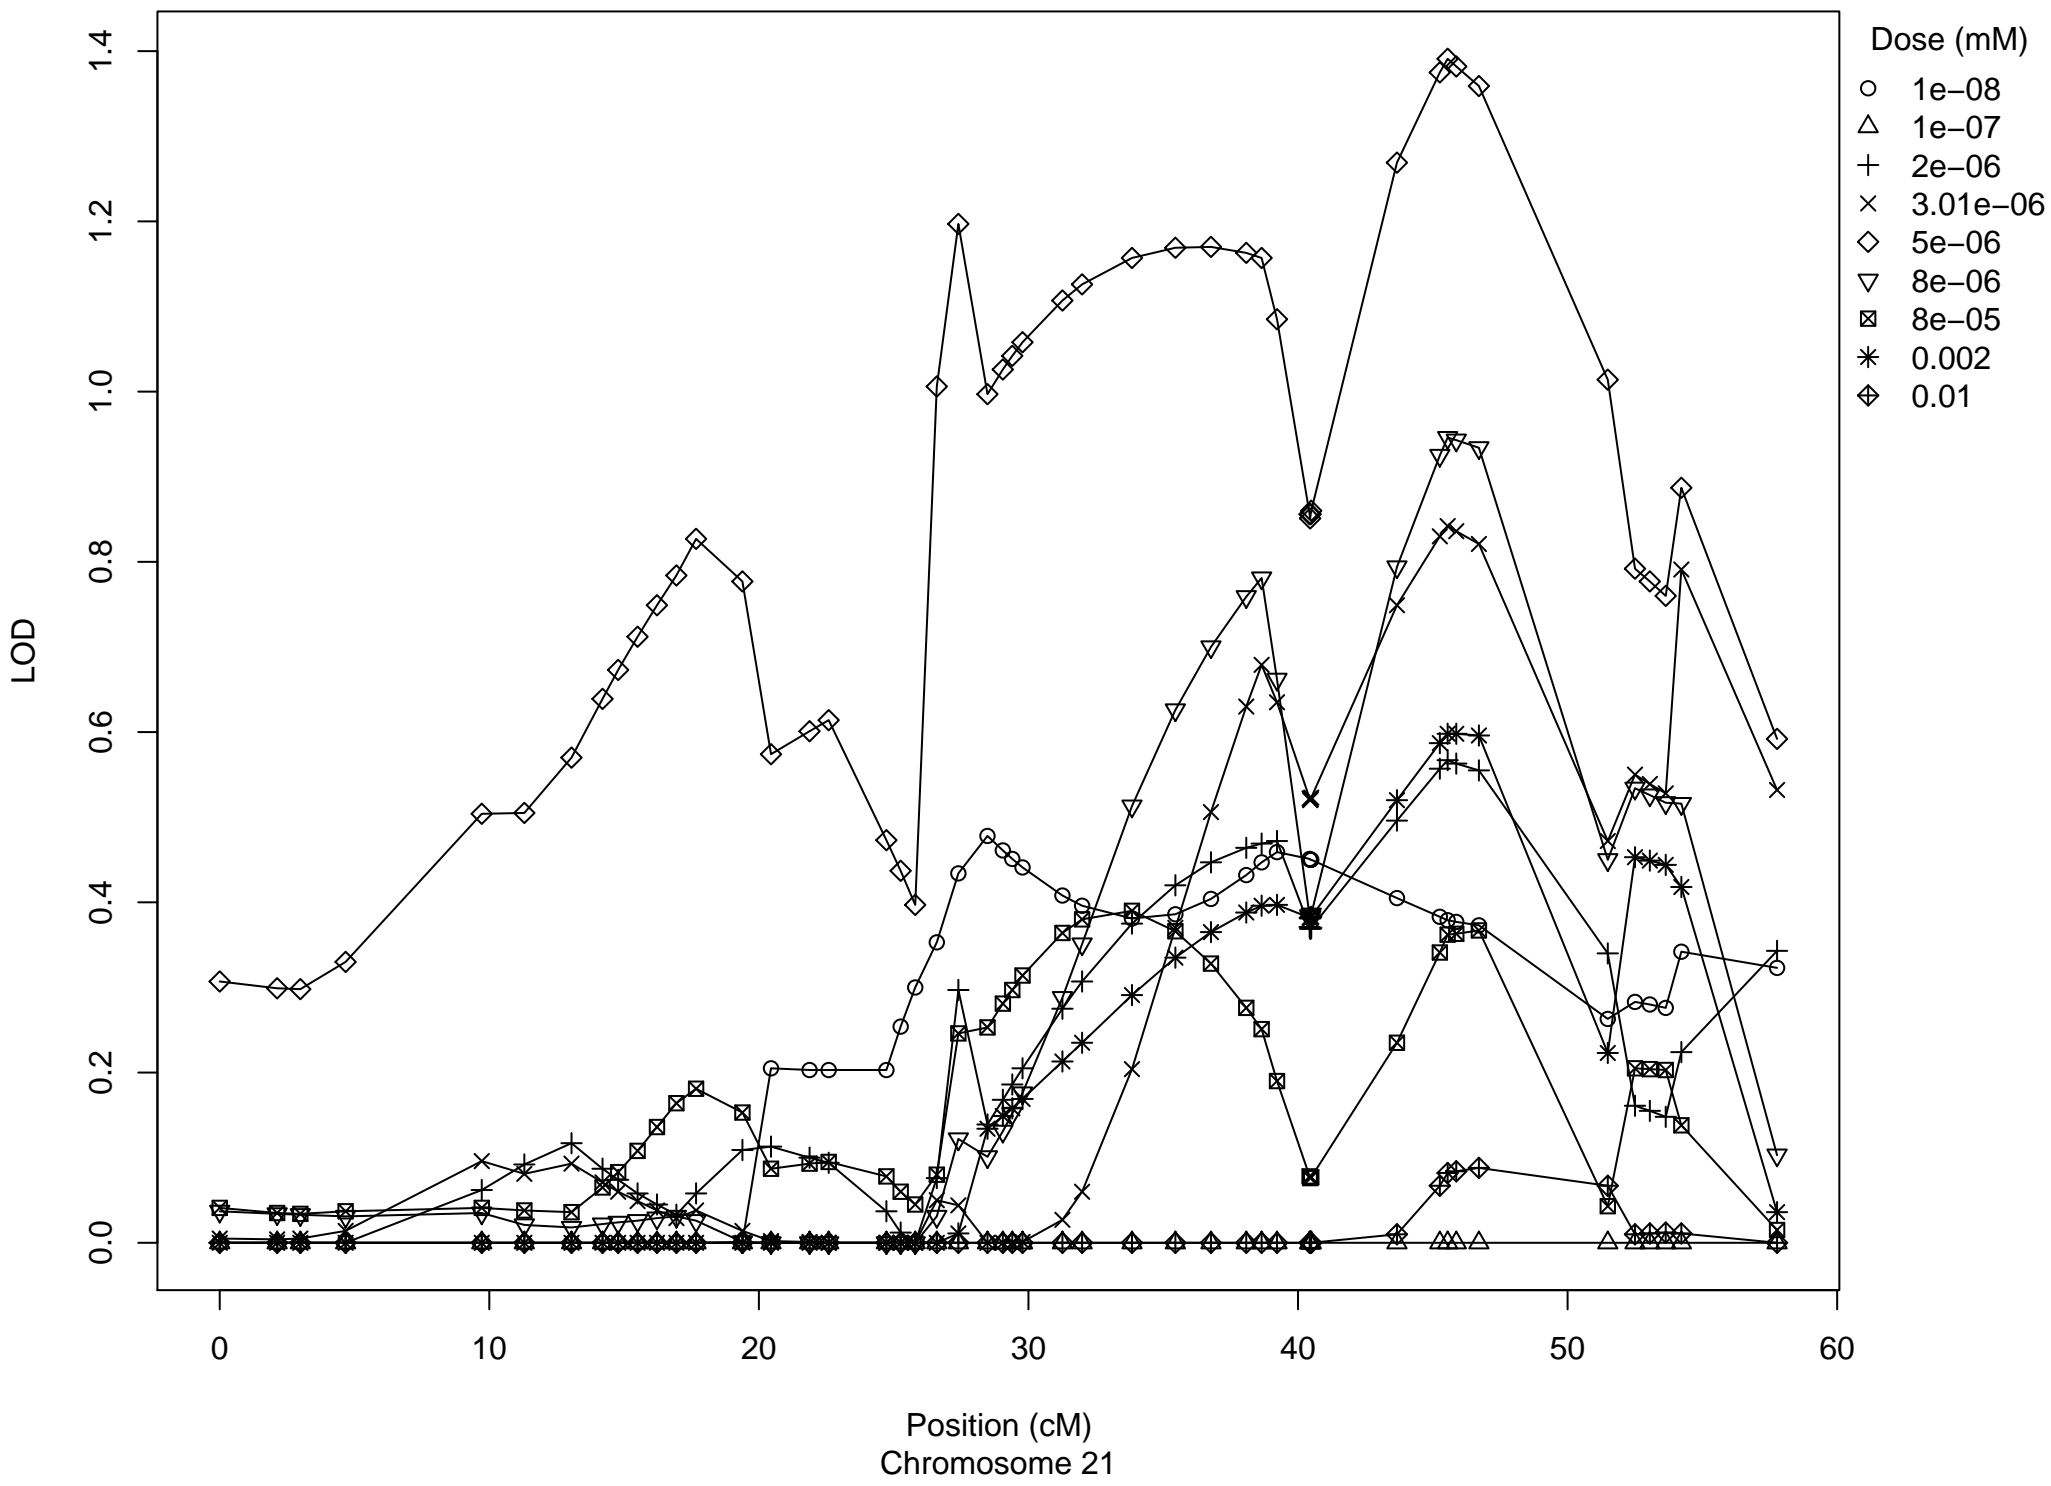



# 9-aminocamptothecin (9AC)

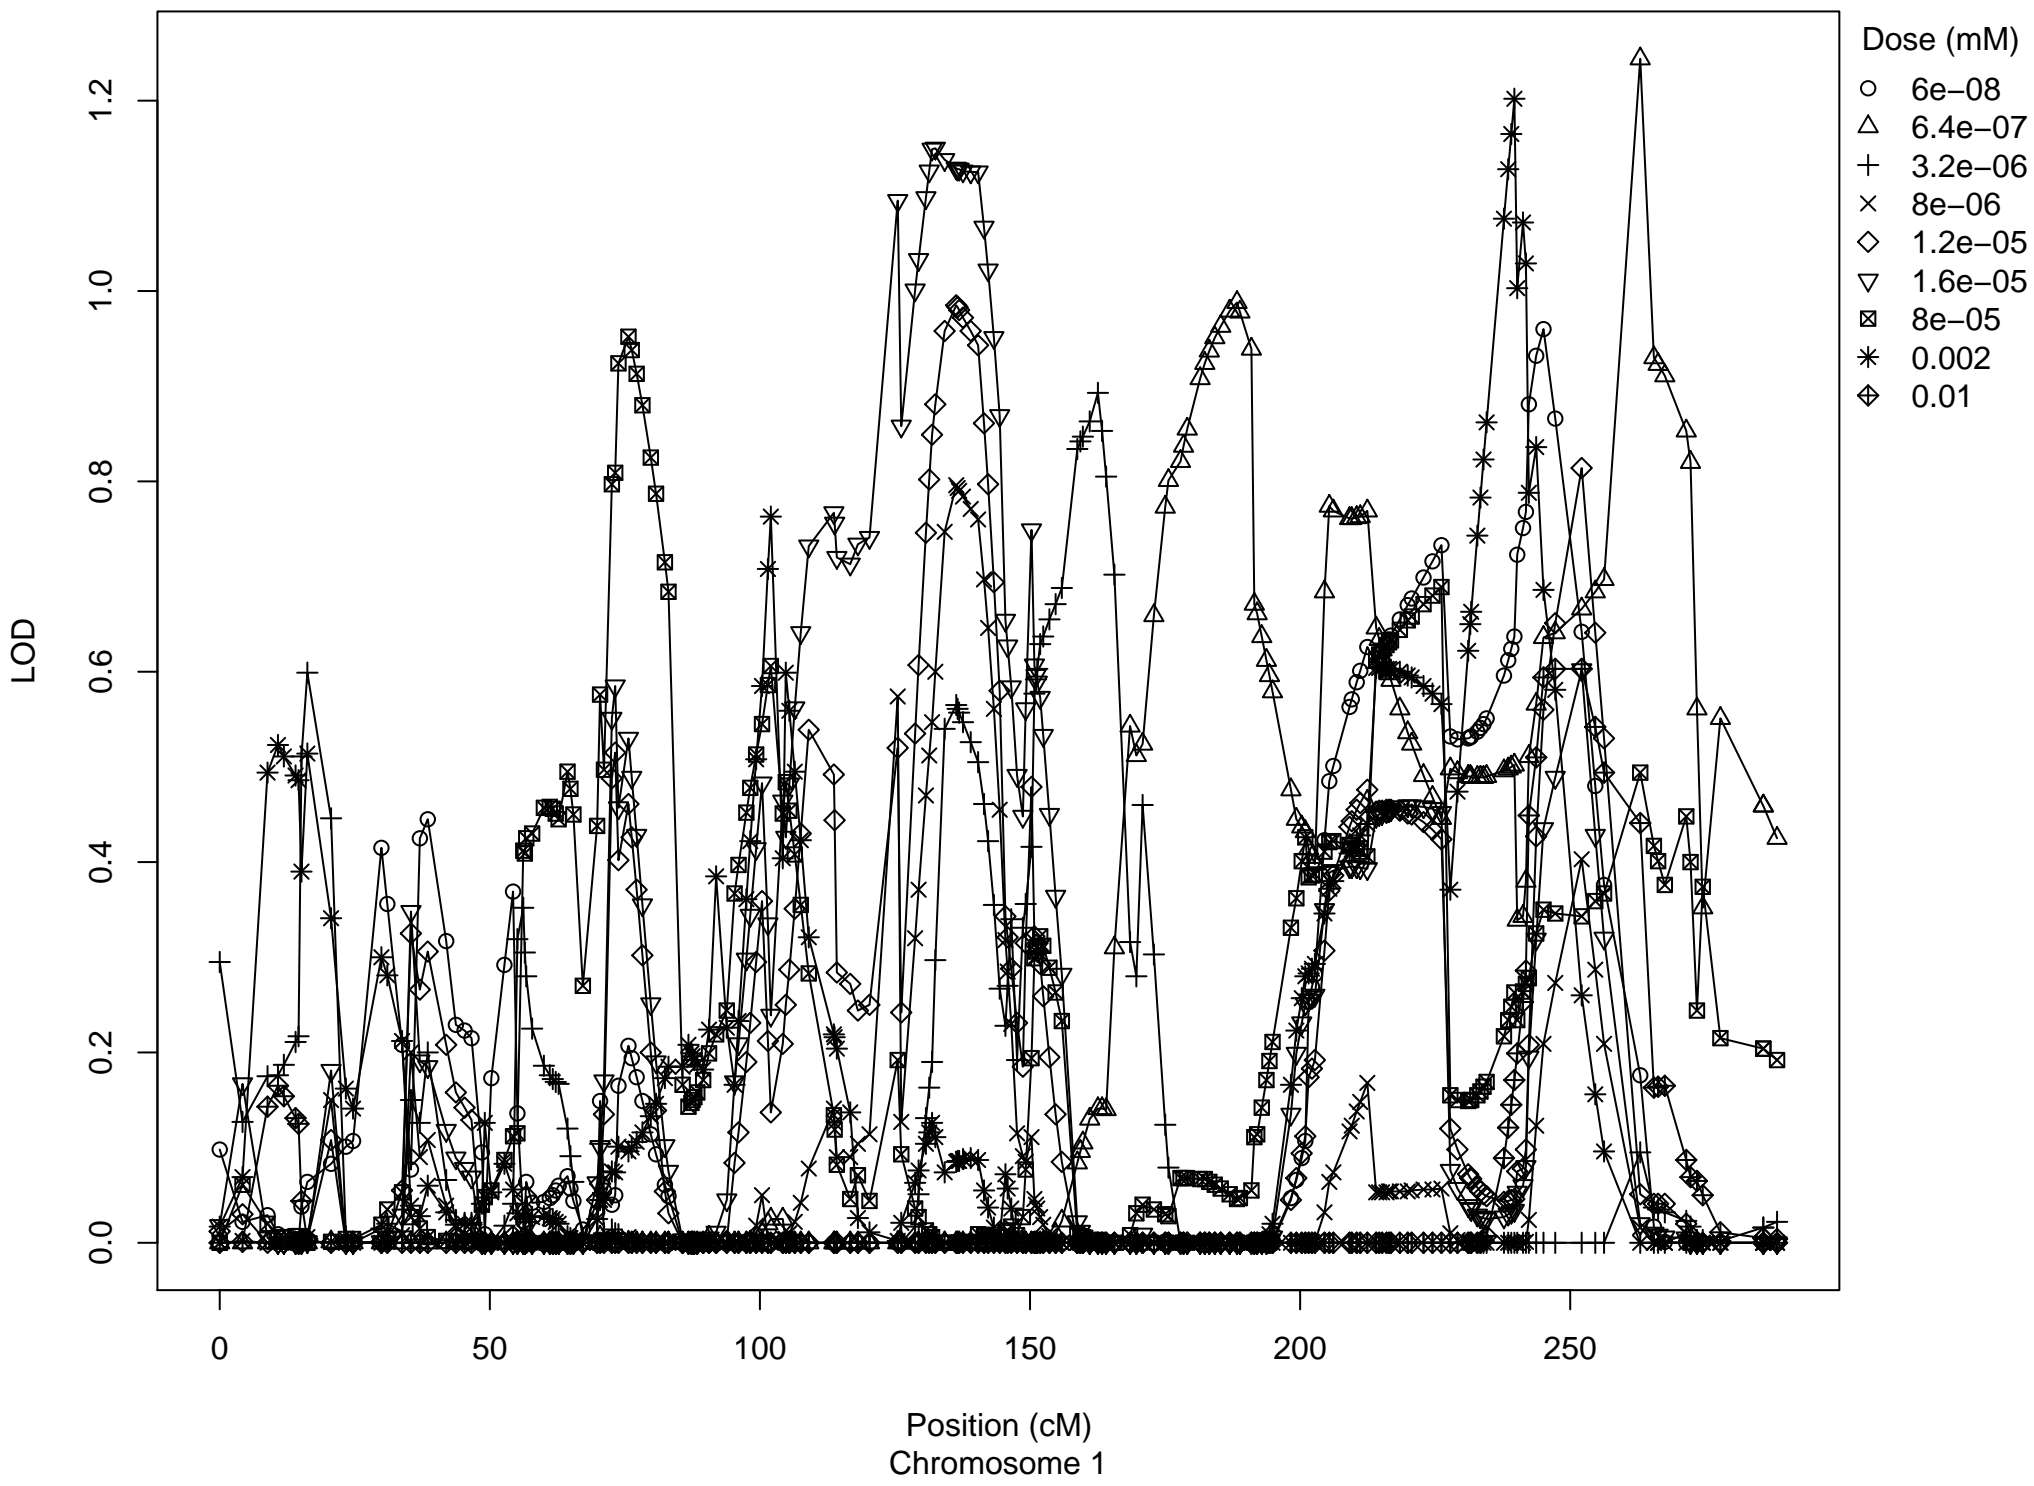

# 9-aminocamptothecin (9AC)

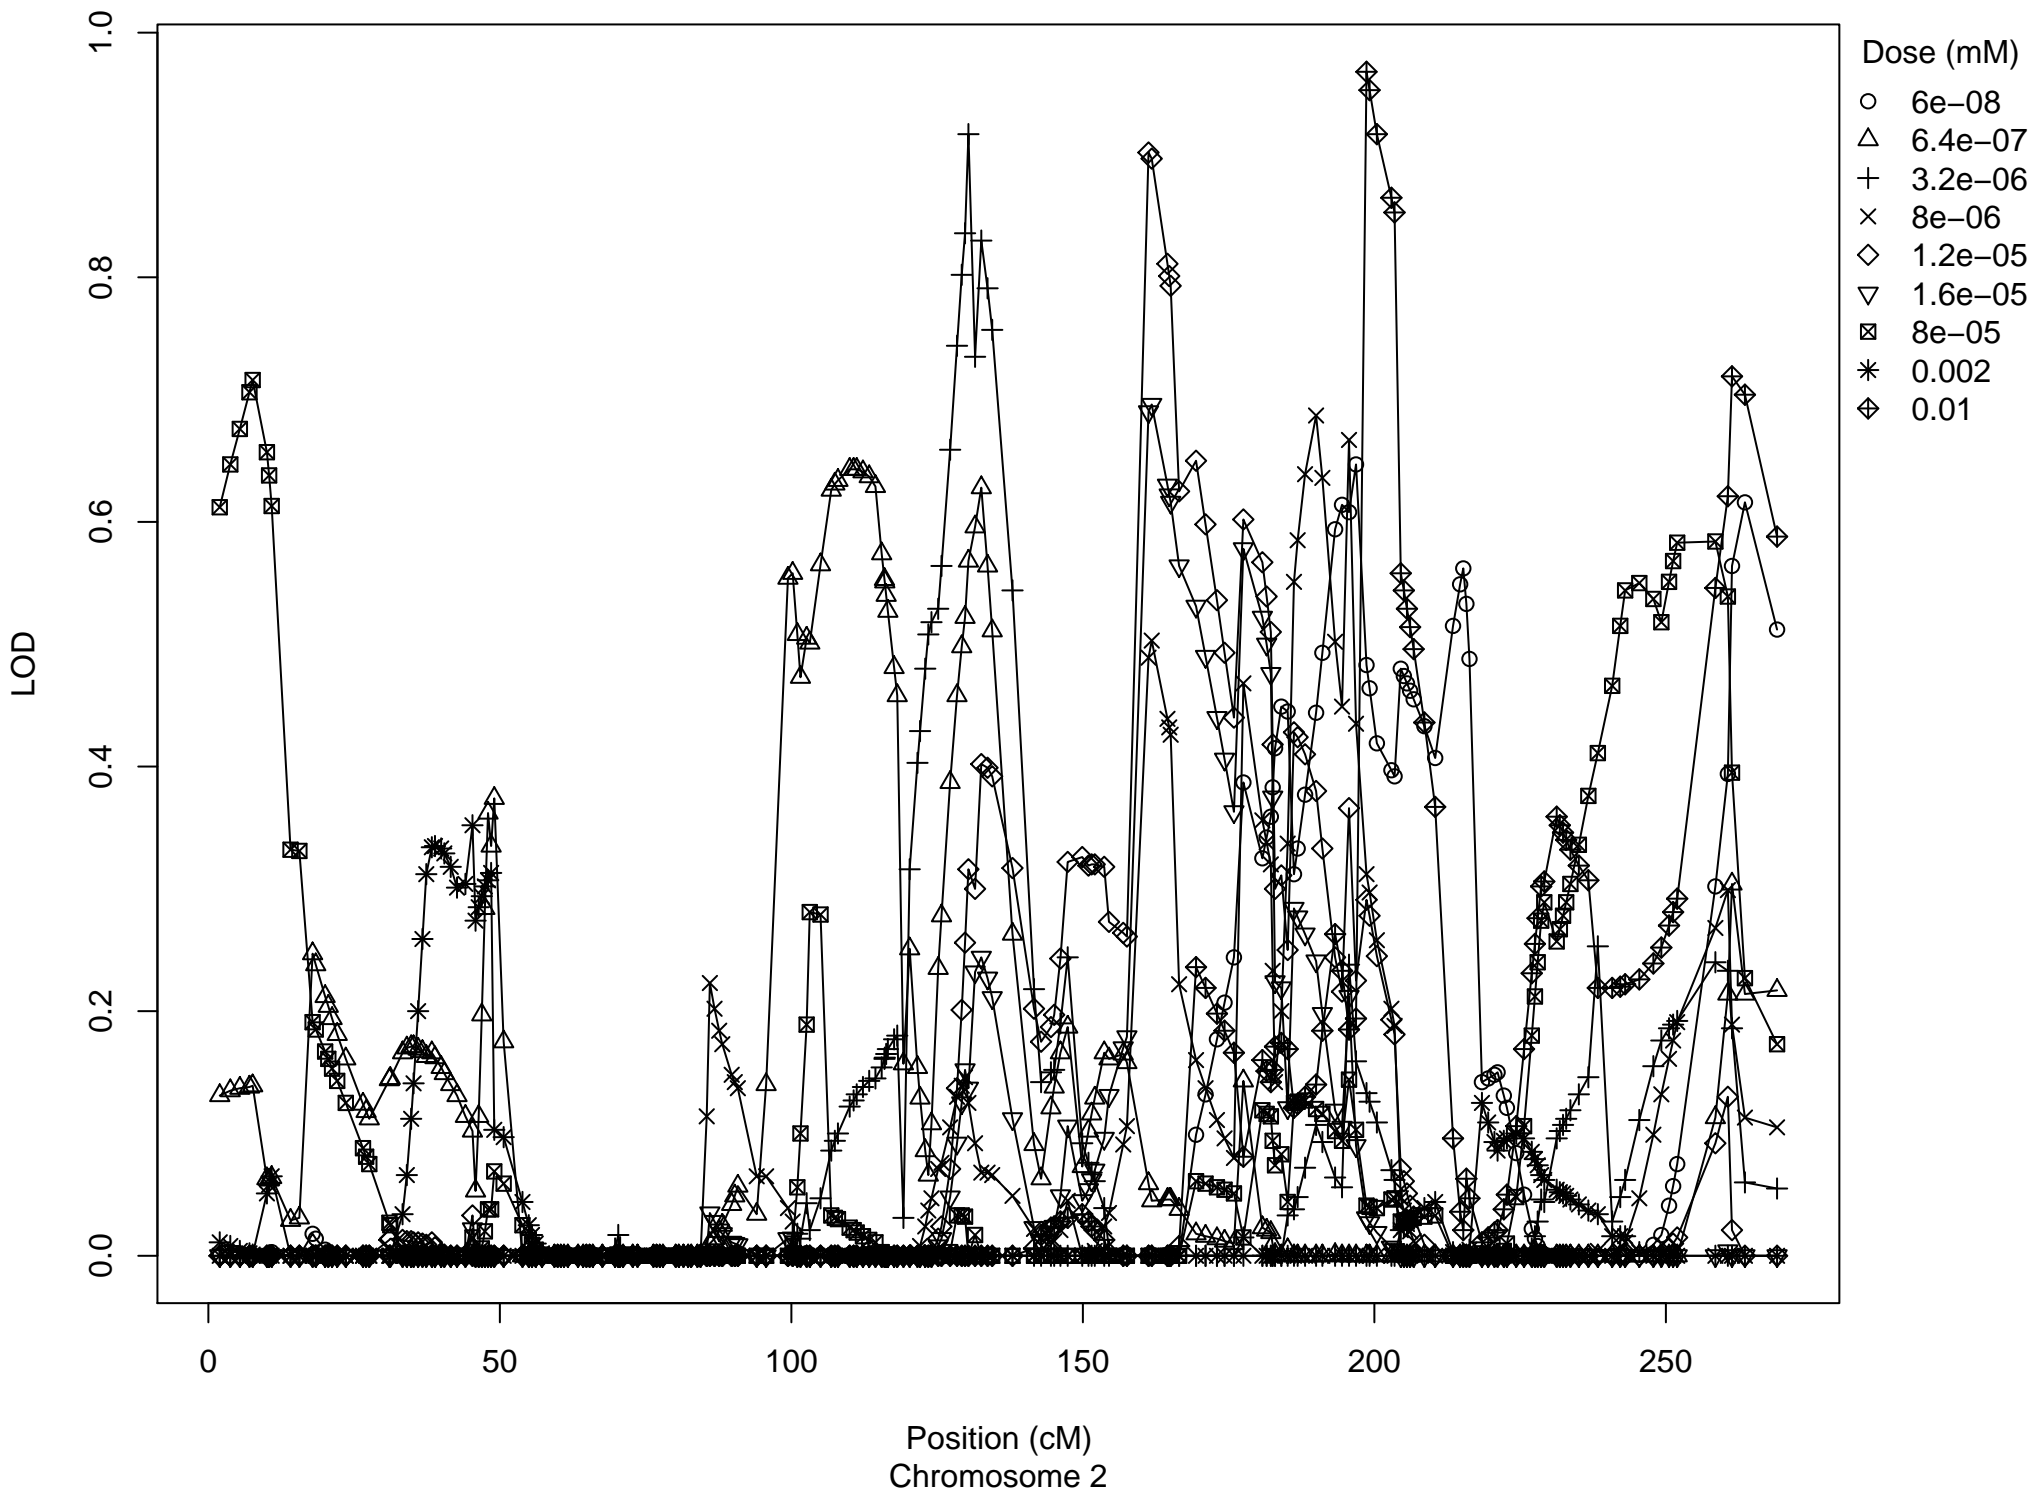



# 9-aminocamptothecin (9AC)

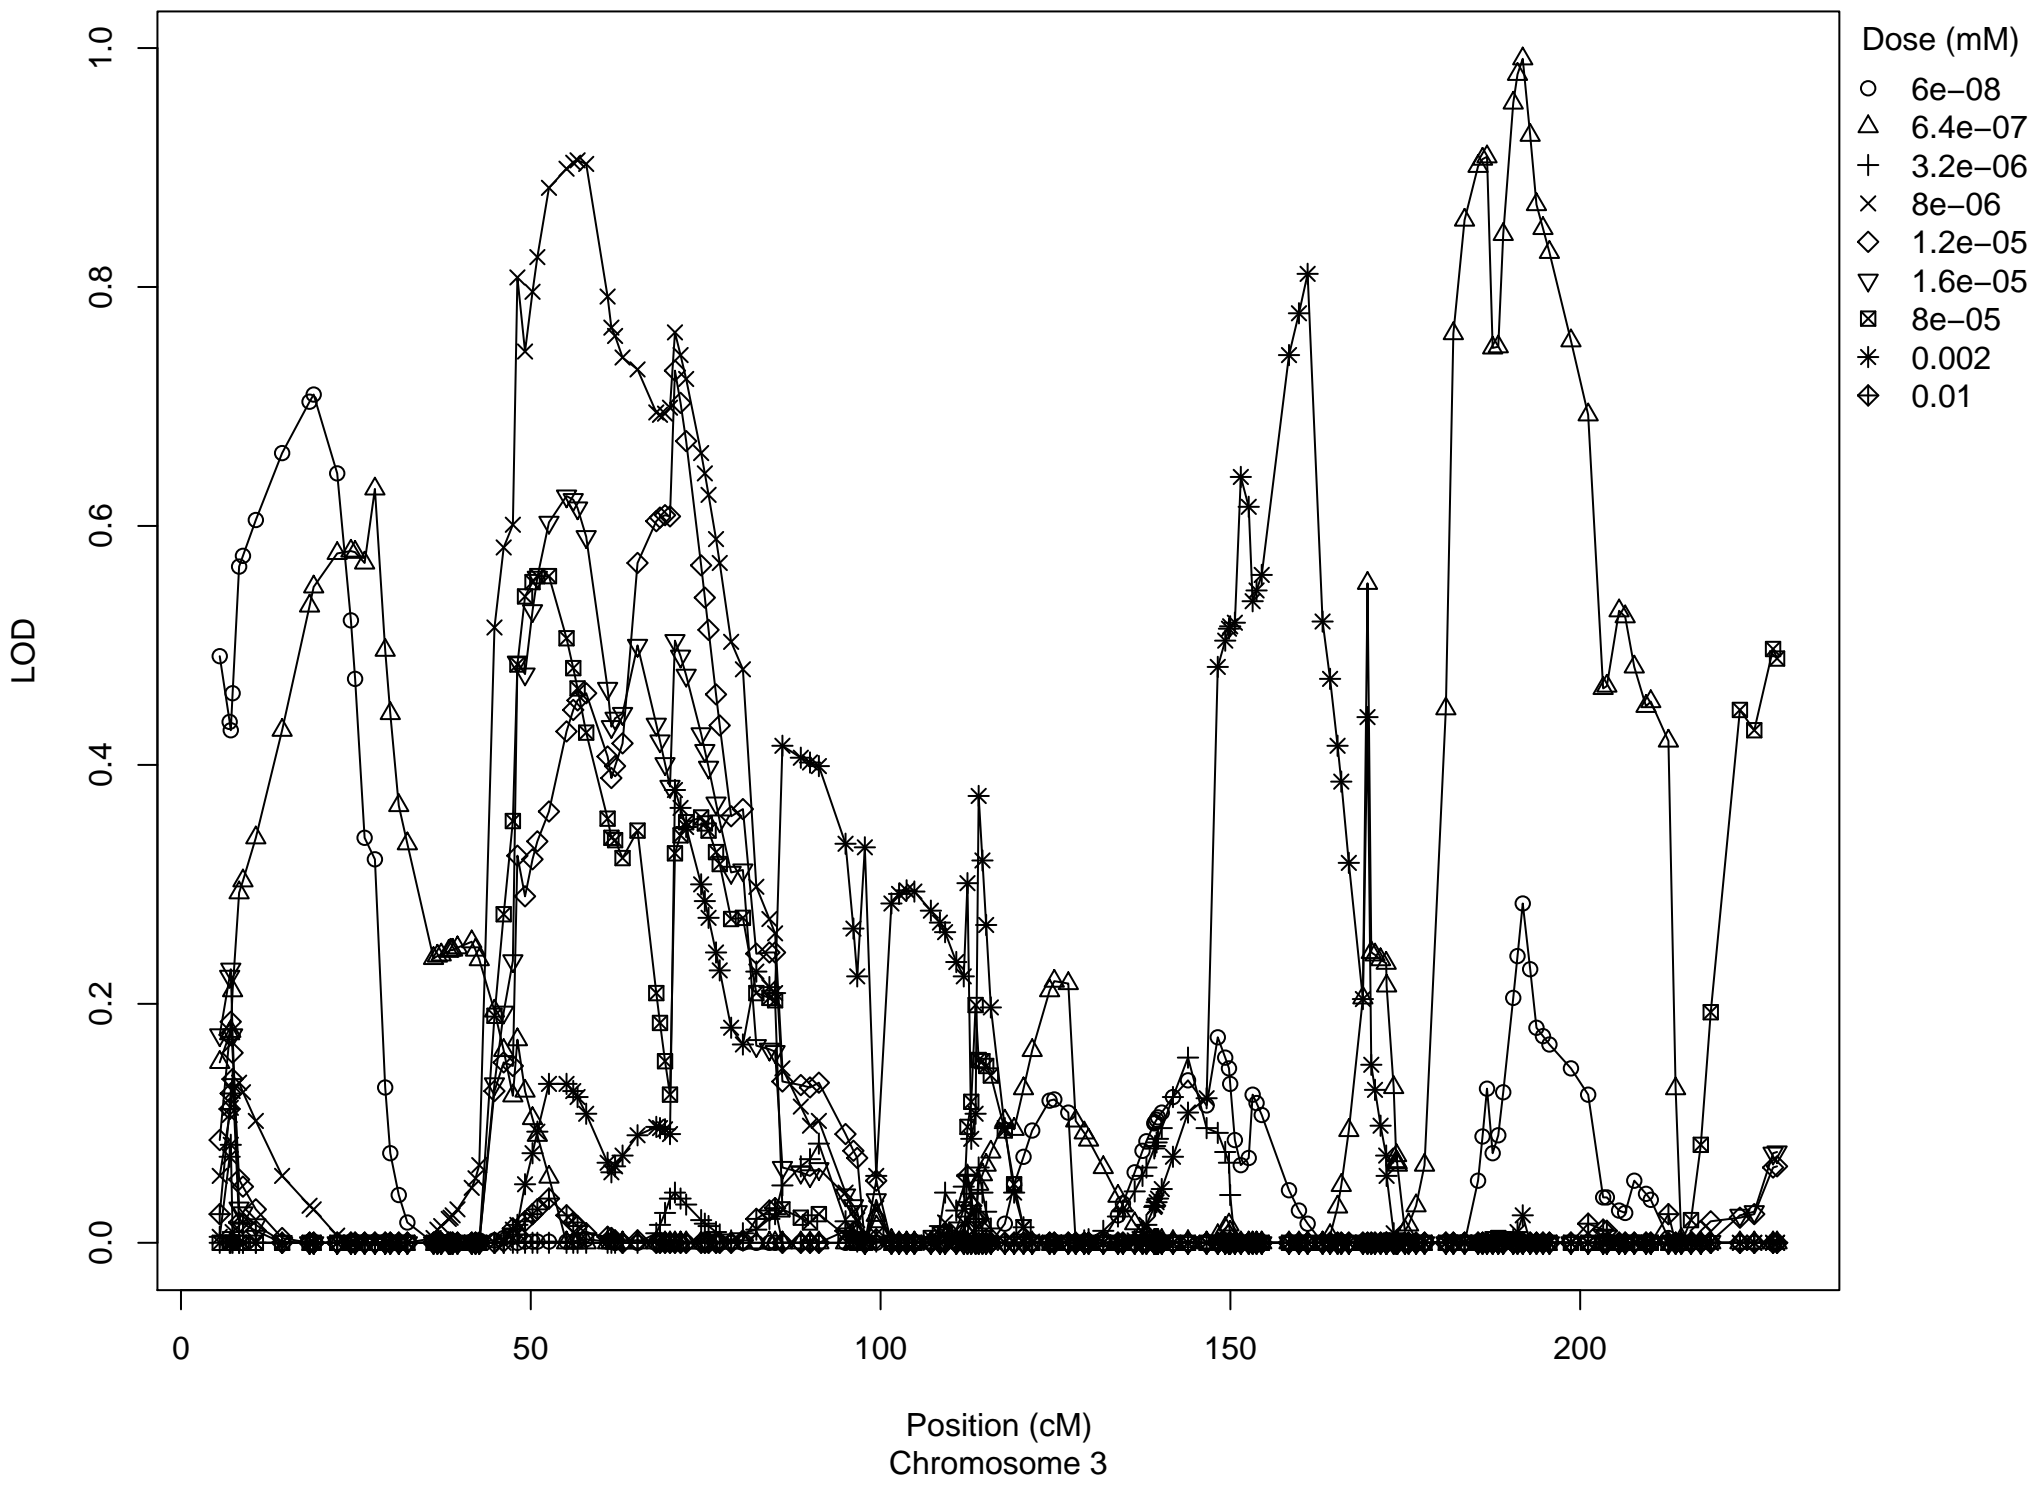

# 9-aminocamptothecin (9AC)

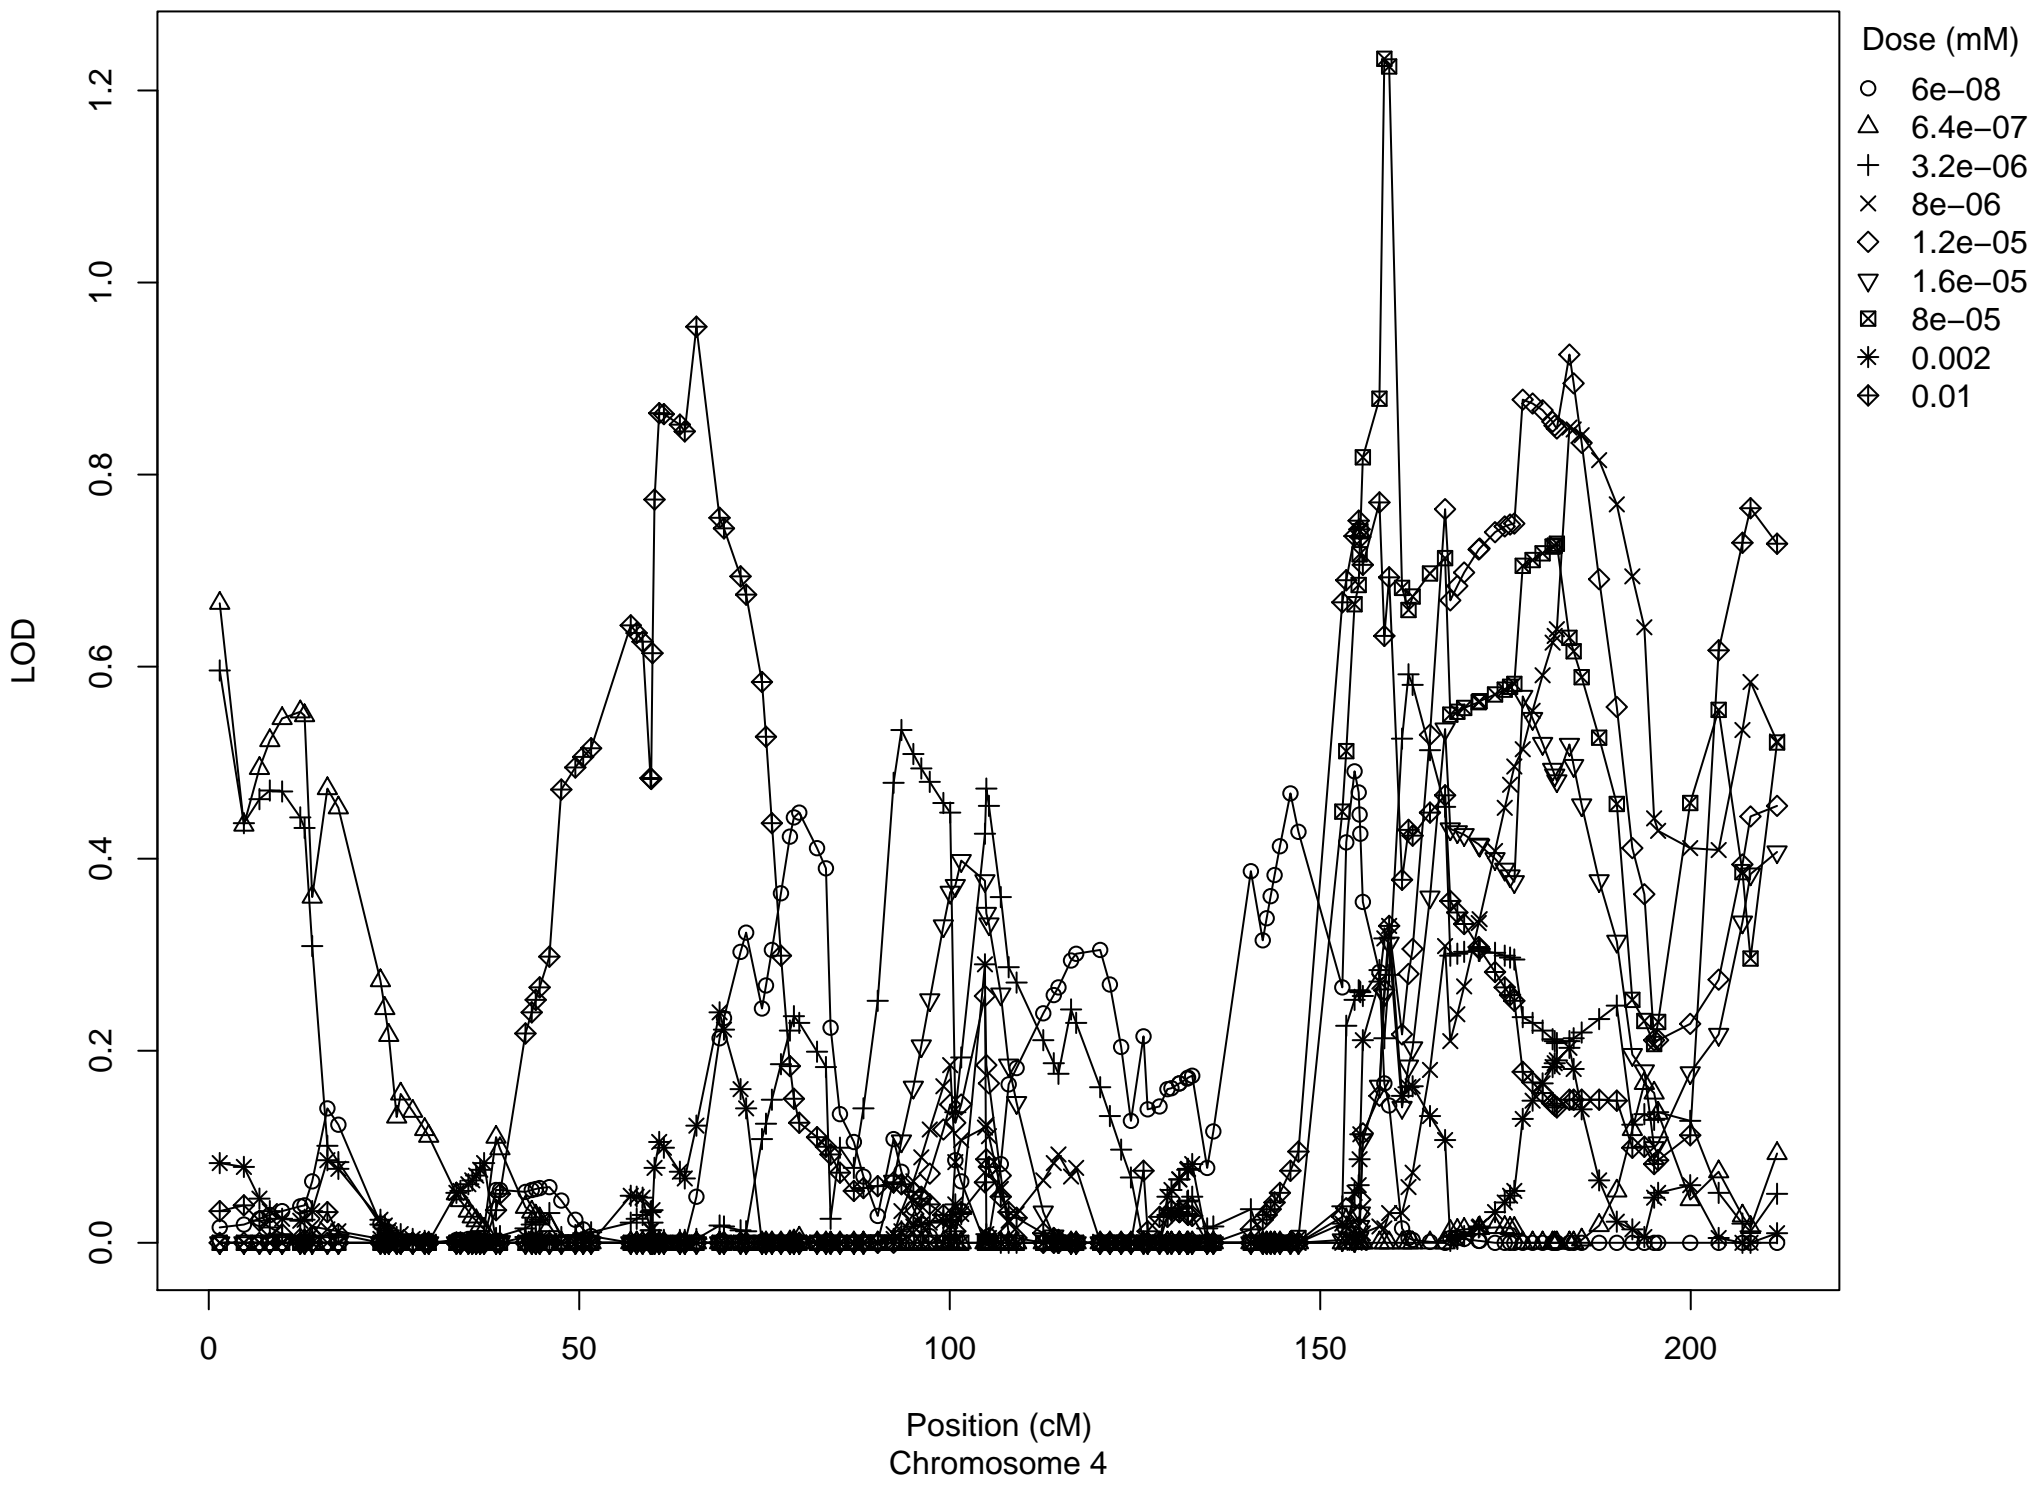

# 9-aminocamptothecin (9AC)

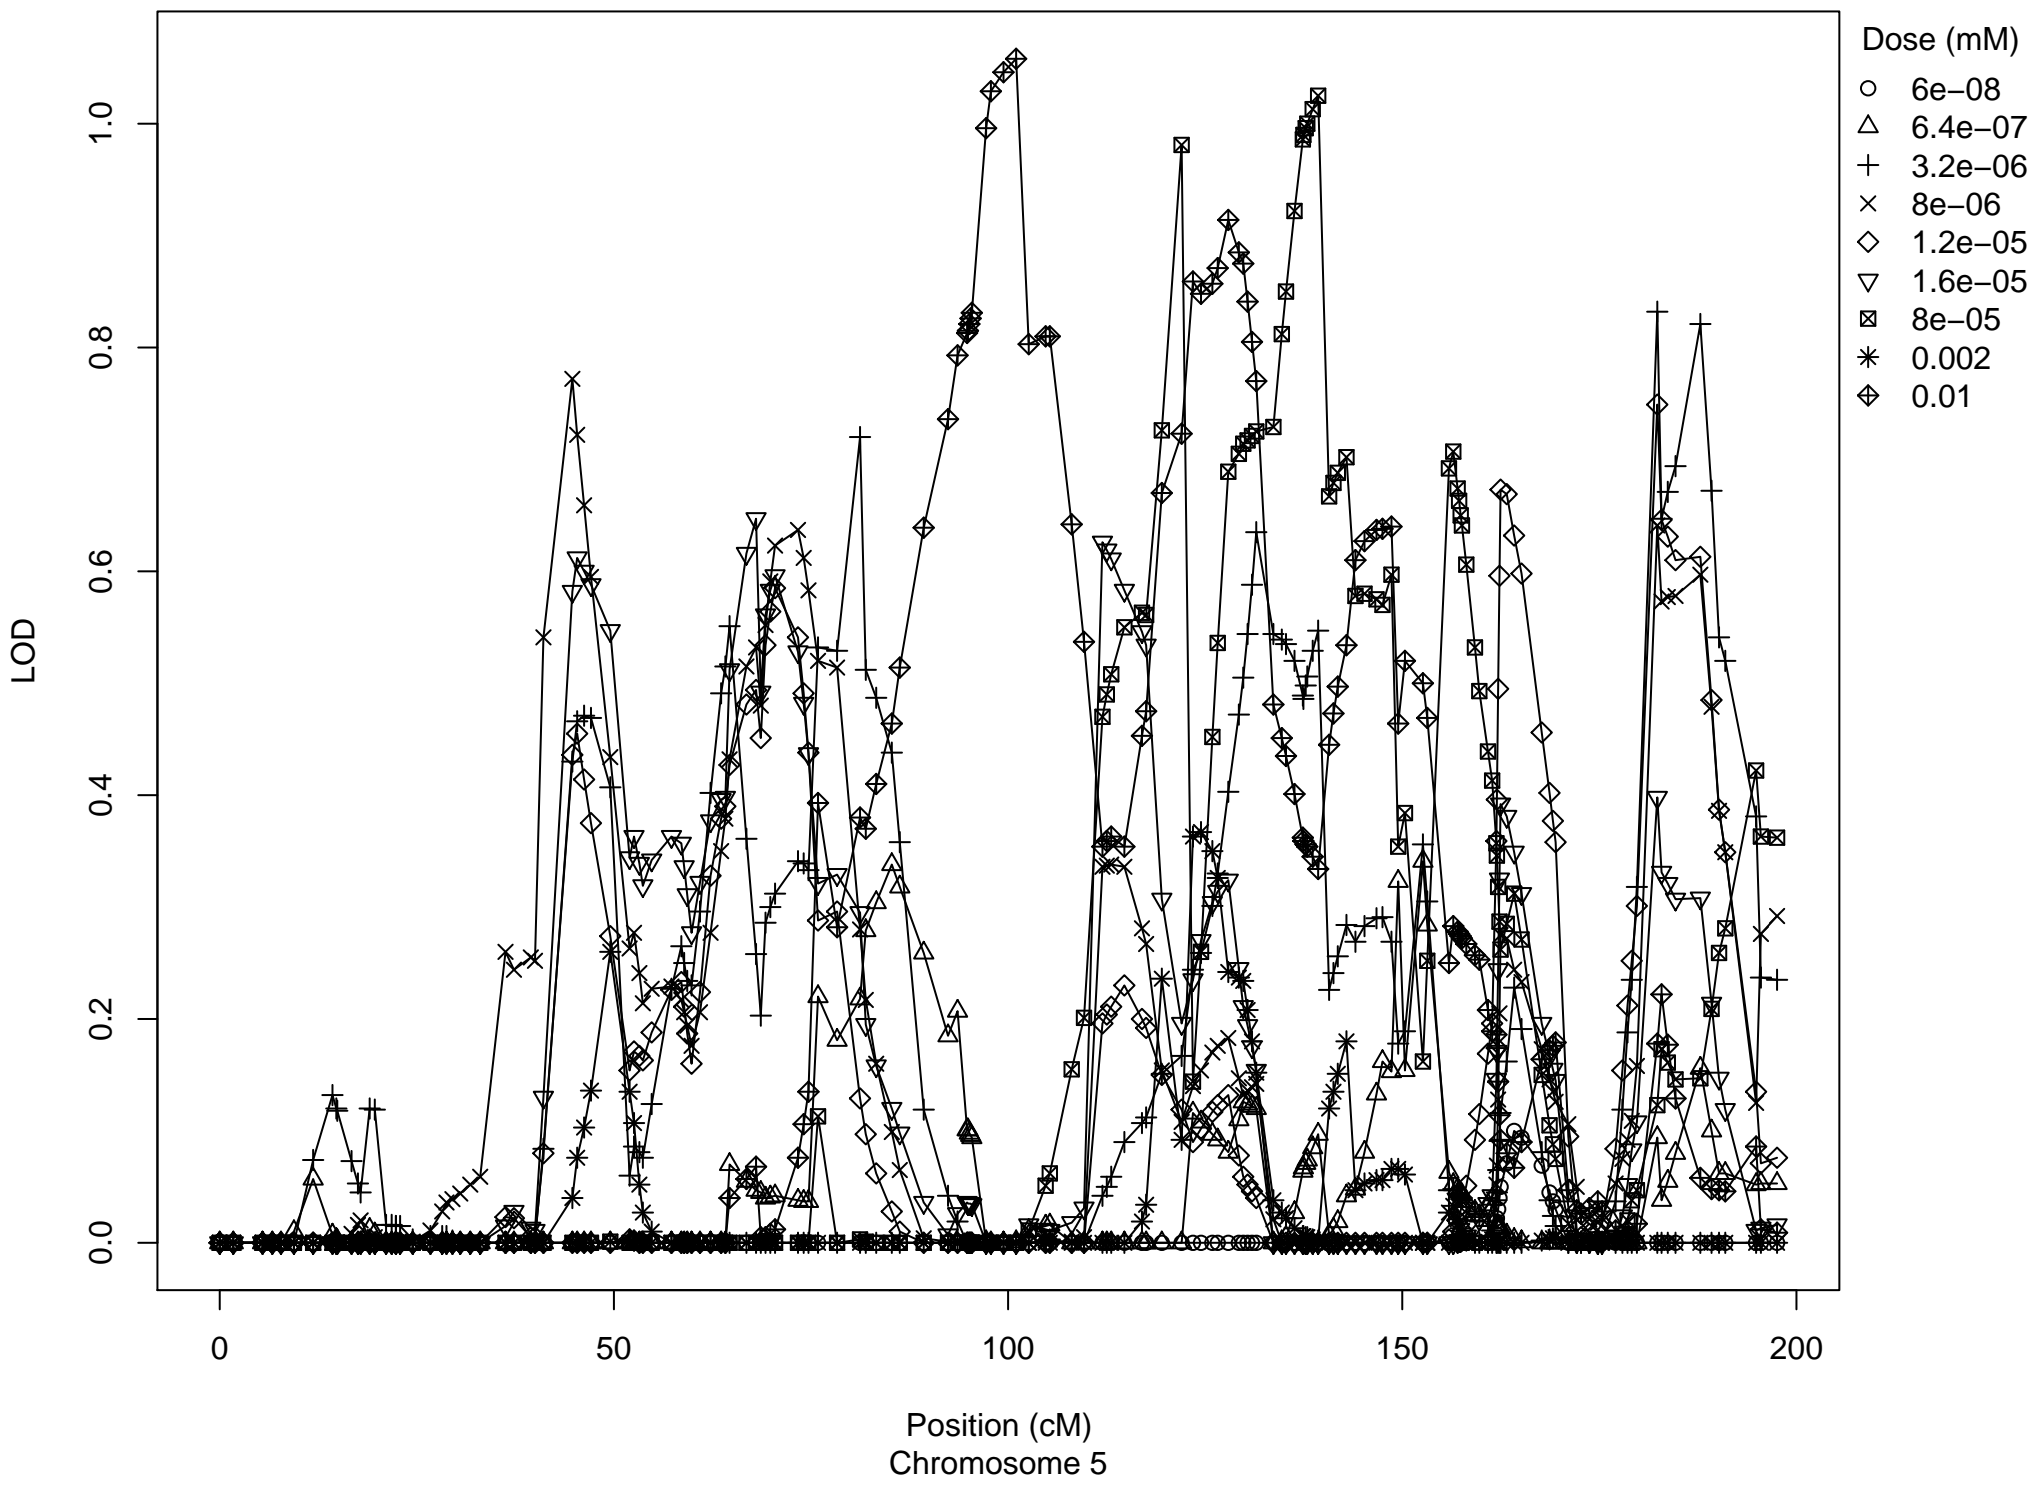

# 9-aminocamptothecin (9AC)

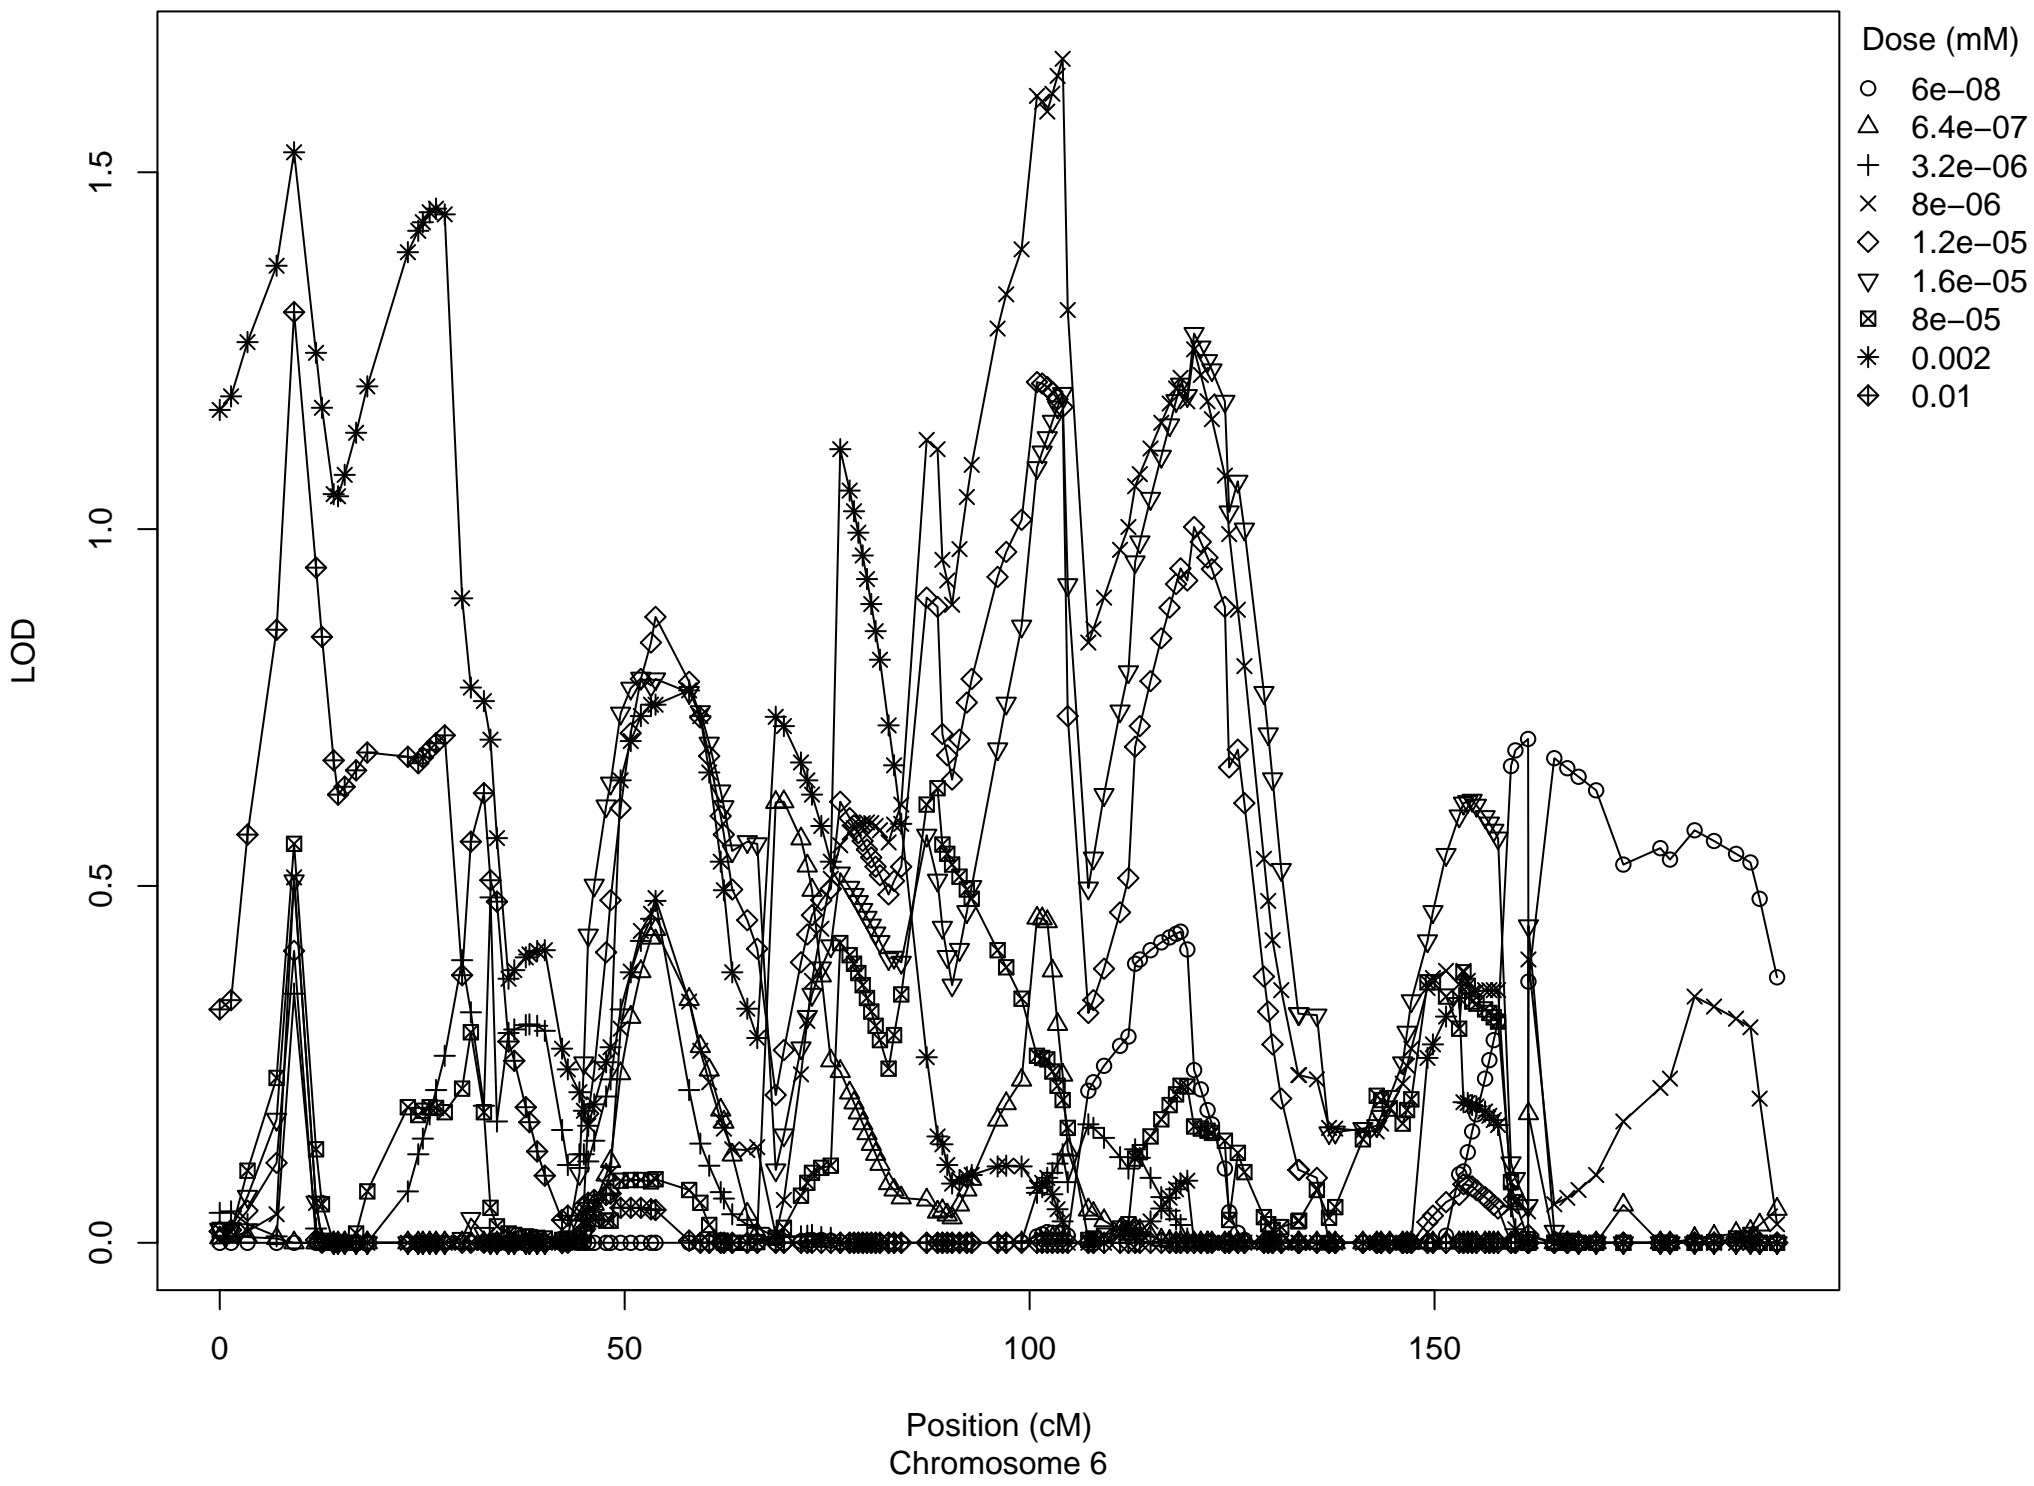

# 9-aminocamptothecin (9AC)

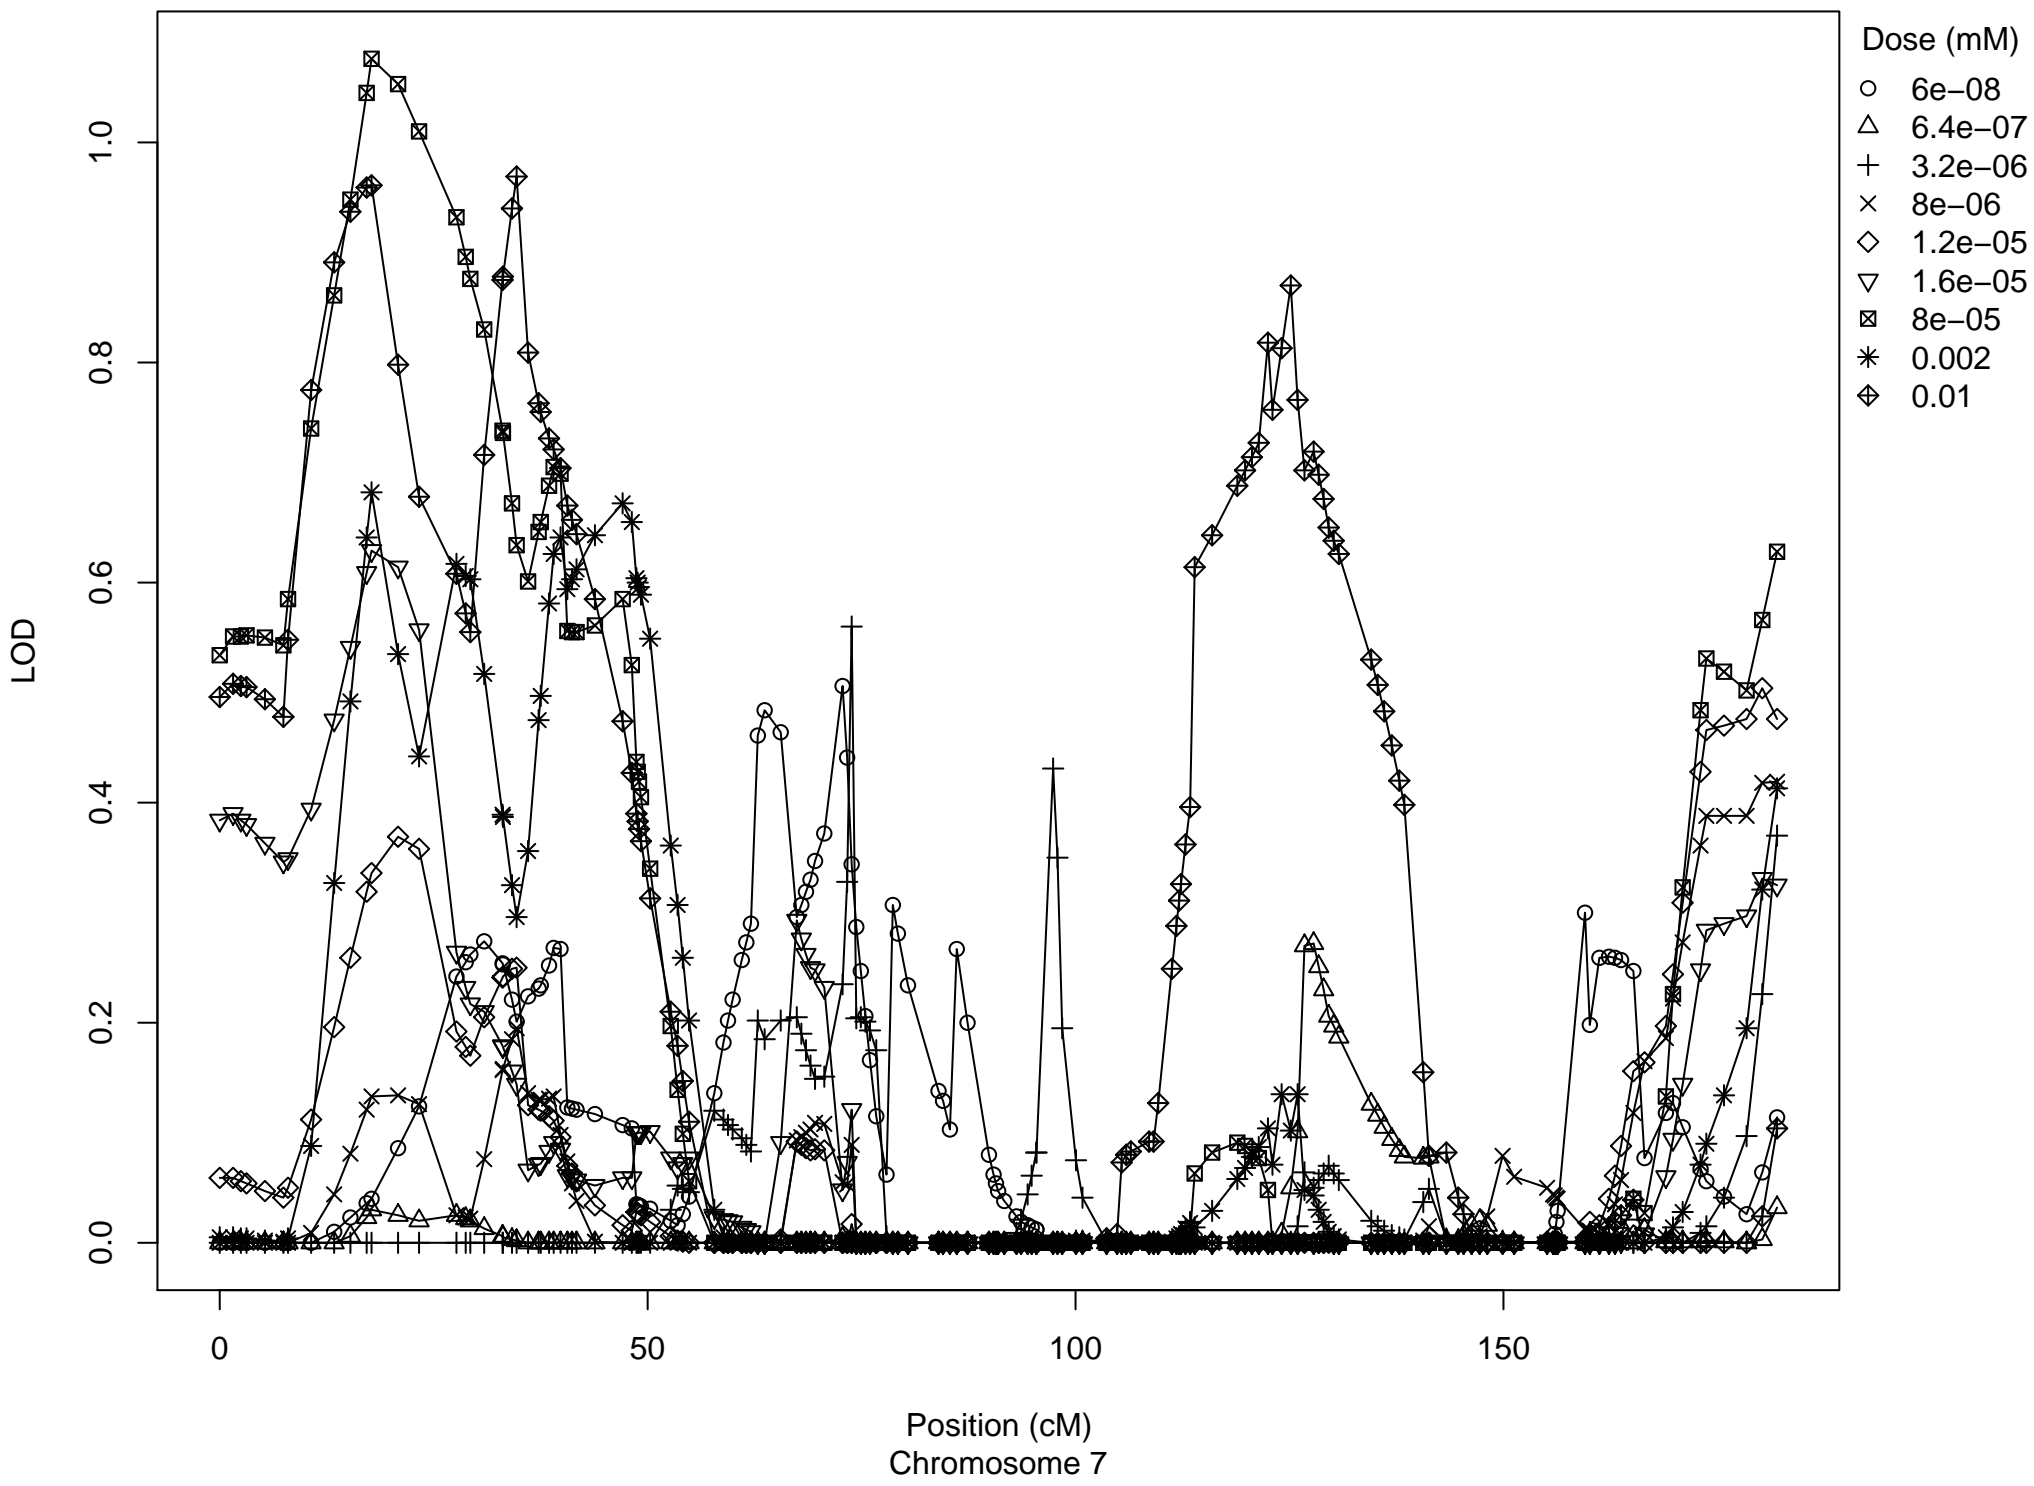

# 9-aminocamptothecin (9AC)

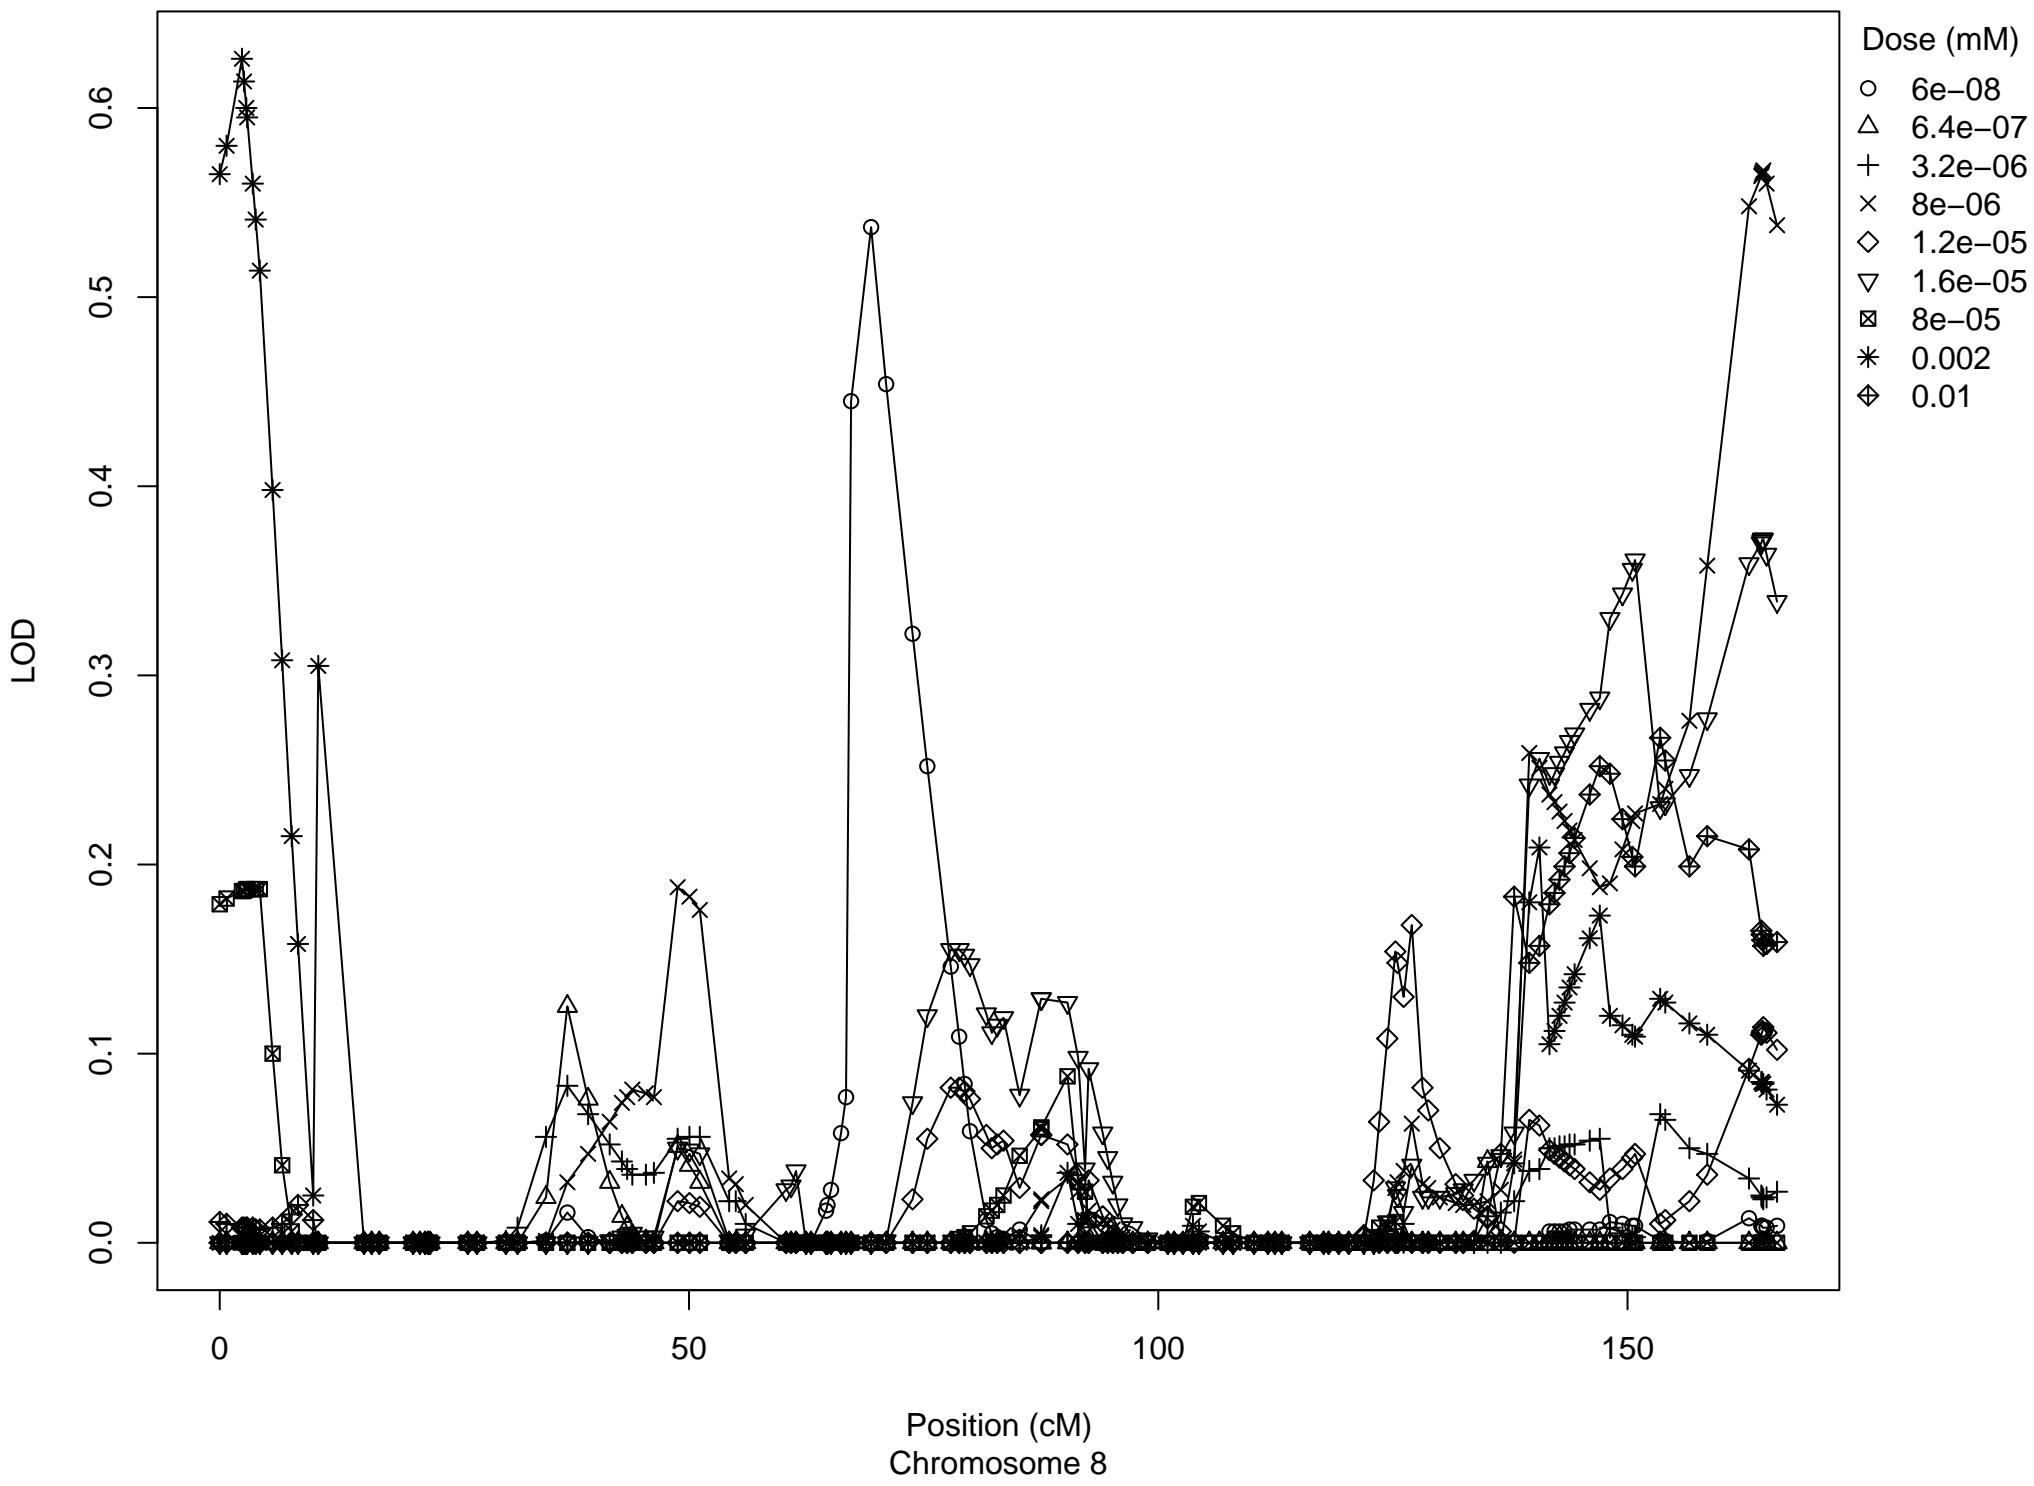

# 9-aminocamptothecin (9AC)

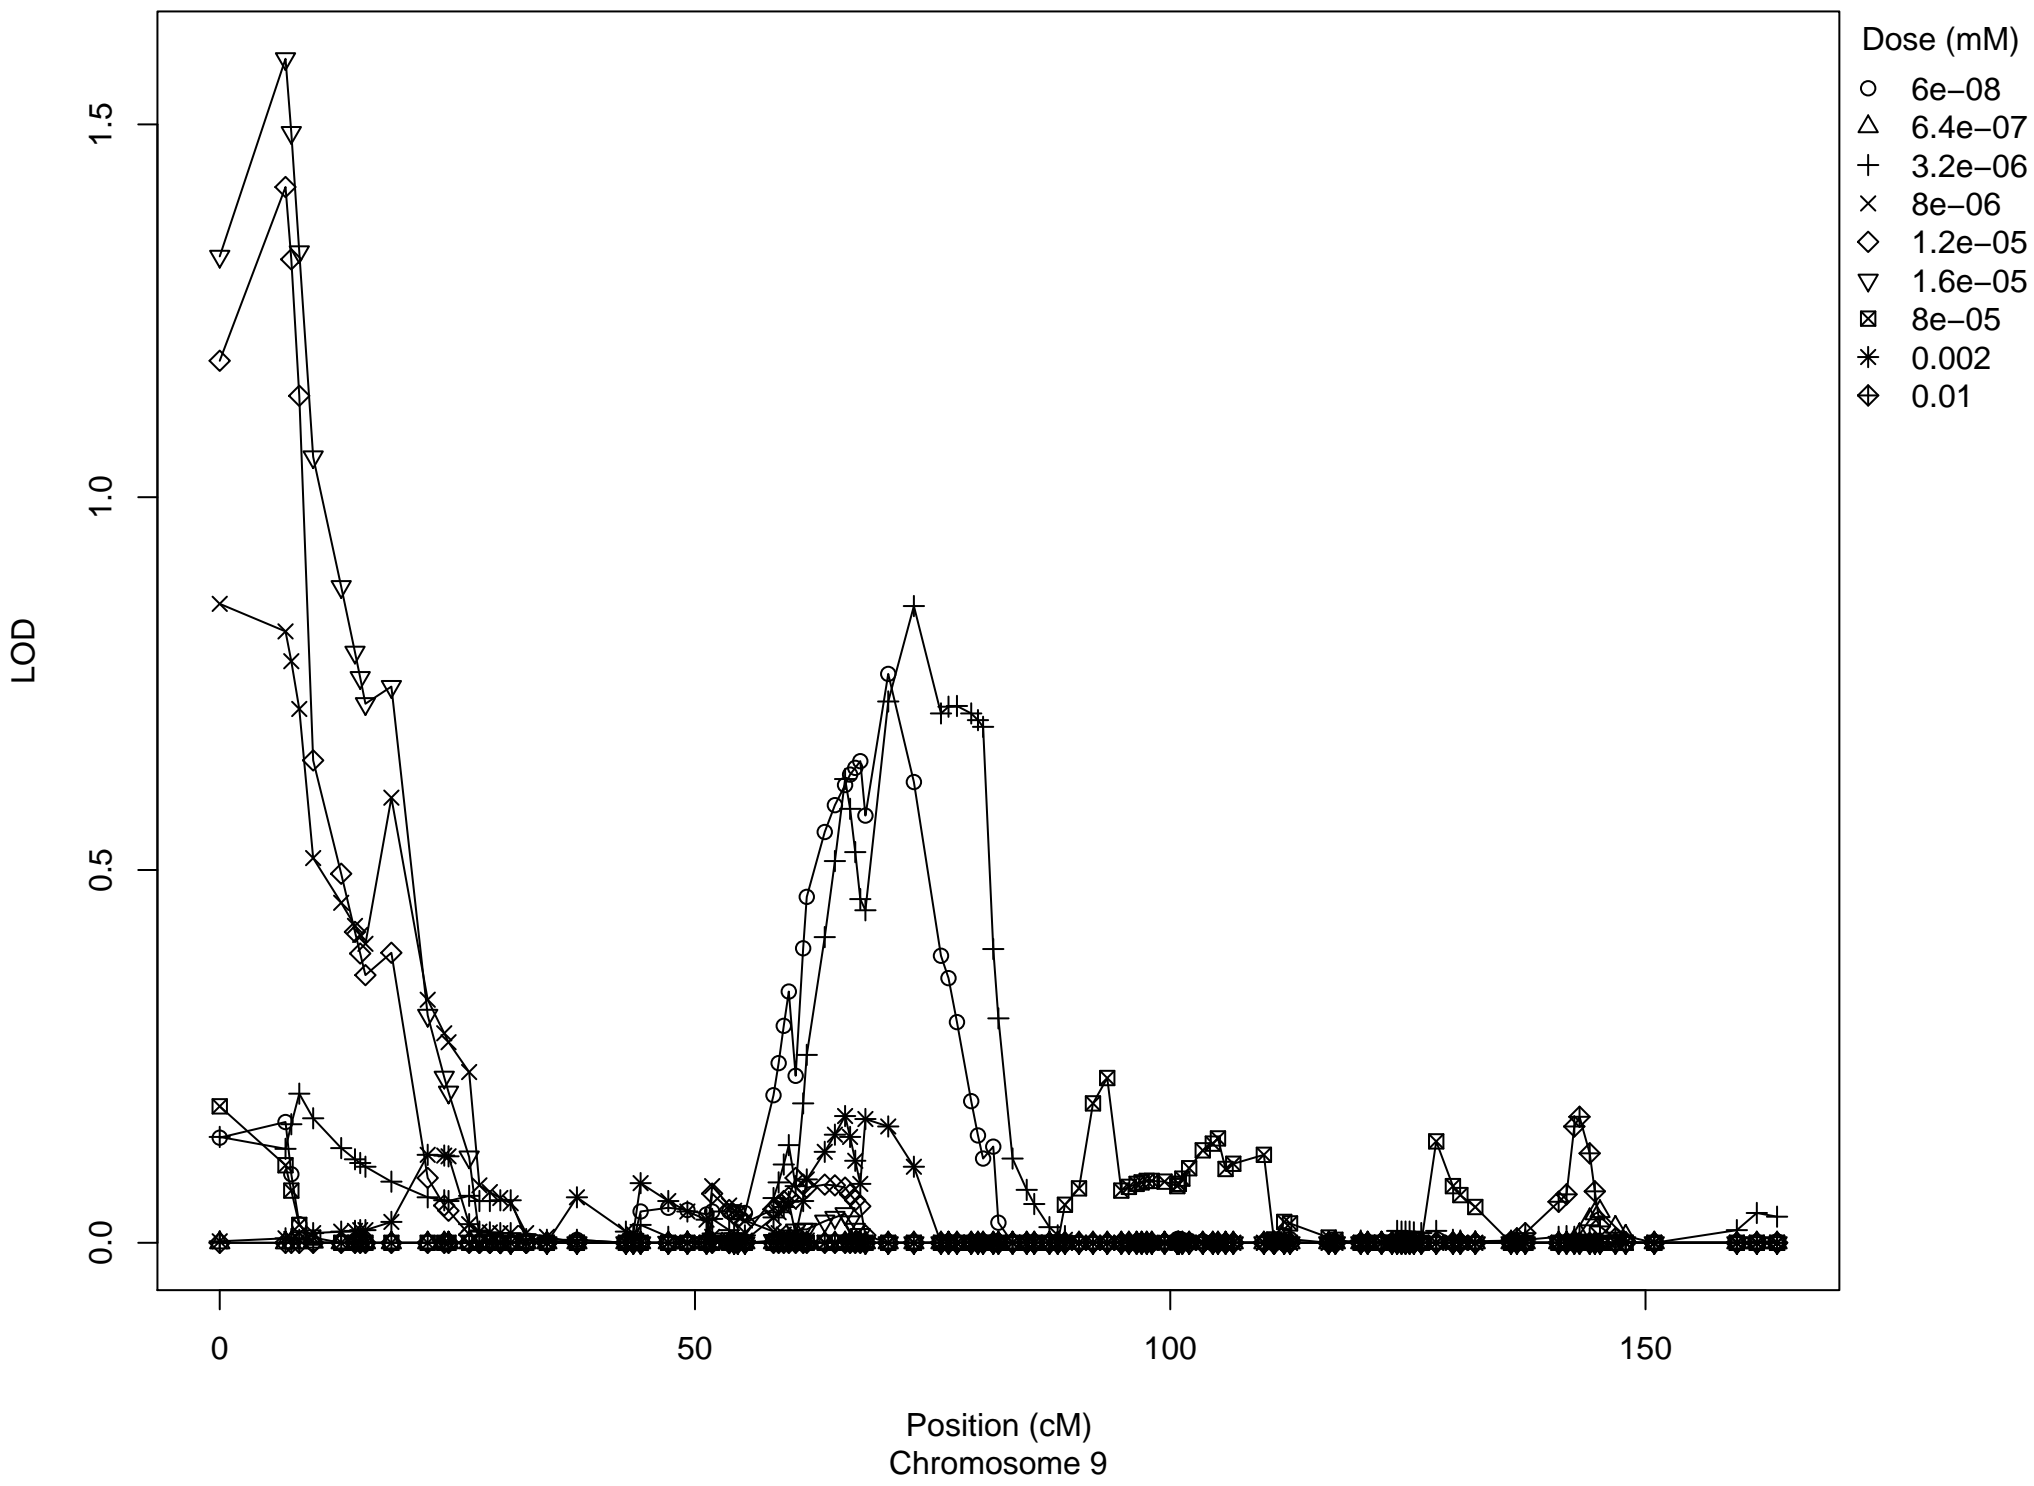

# 9-aminocamptothecin (9AC)

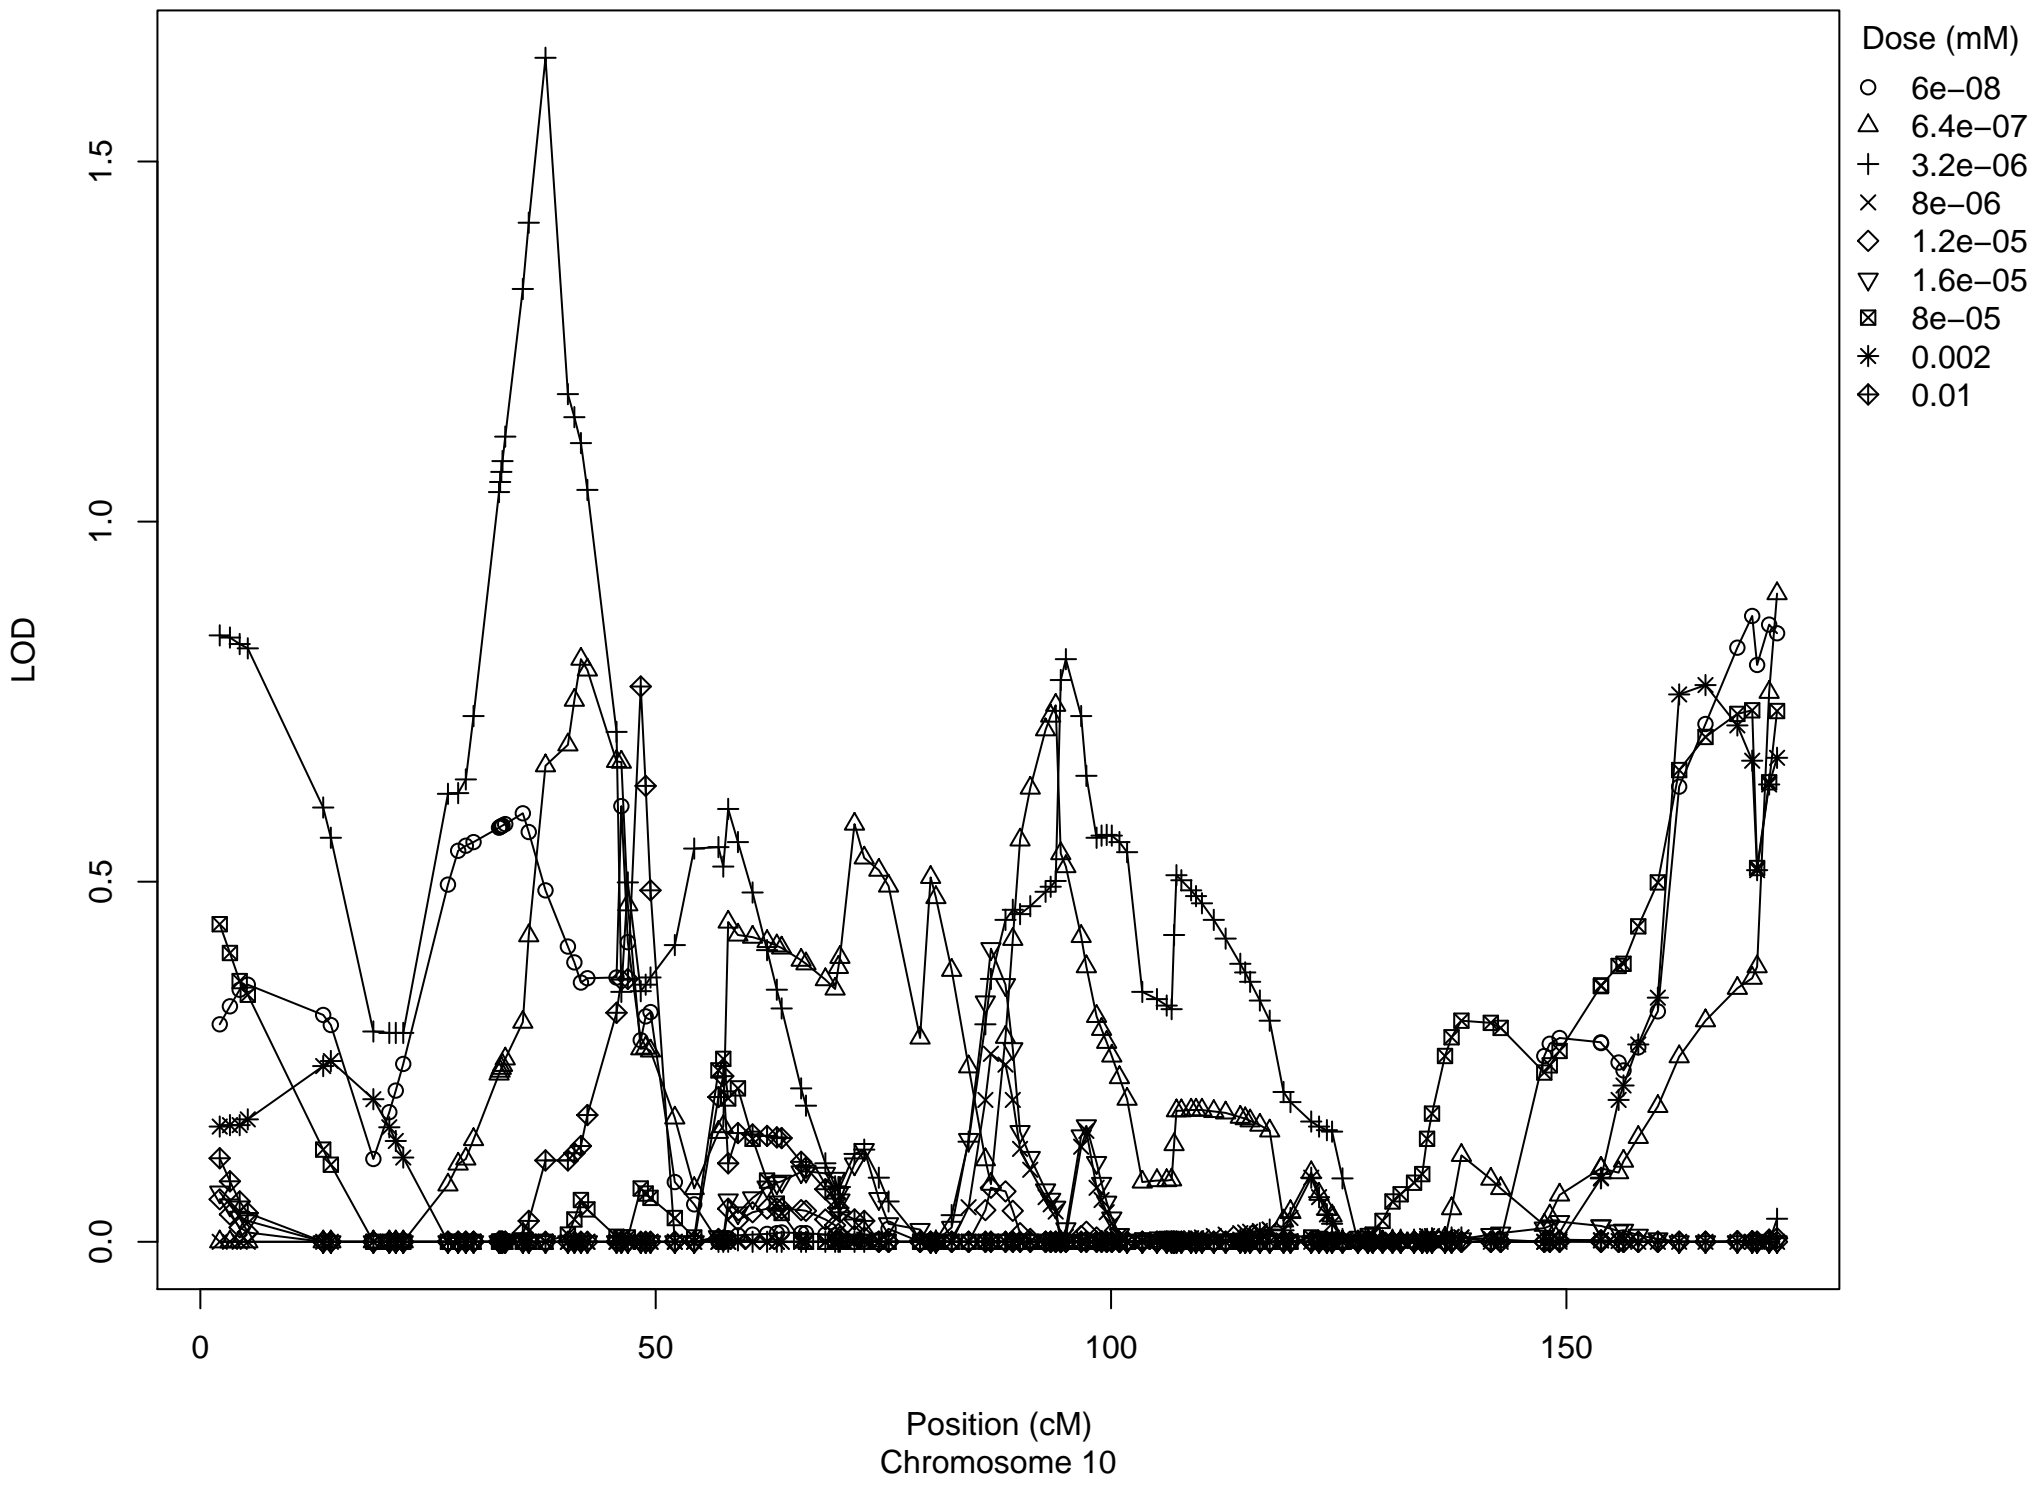



# 9-aminocamptothecin (9AC)

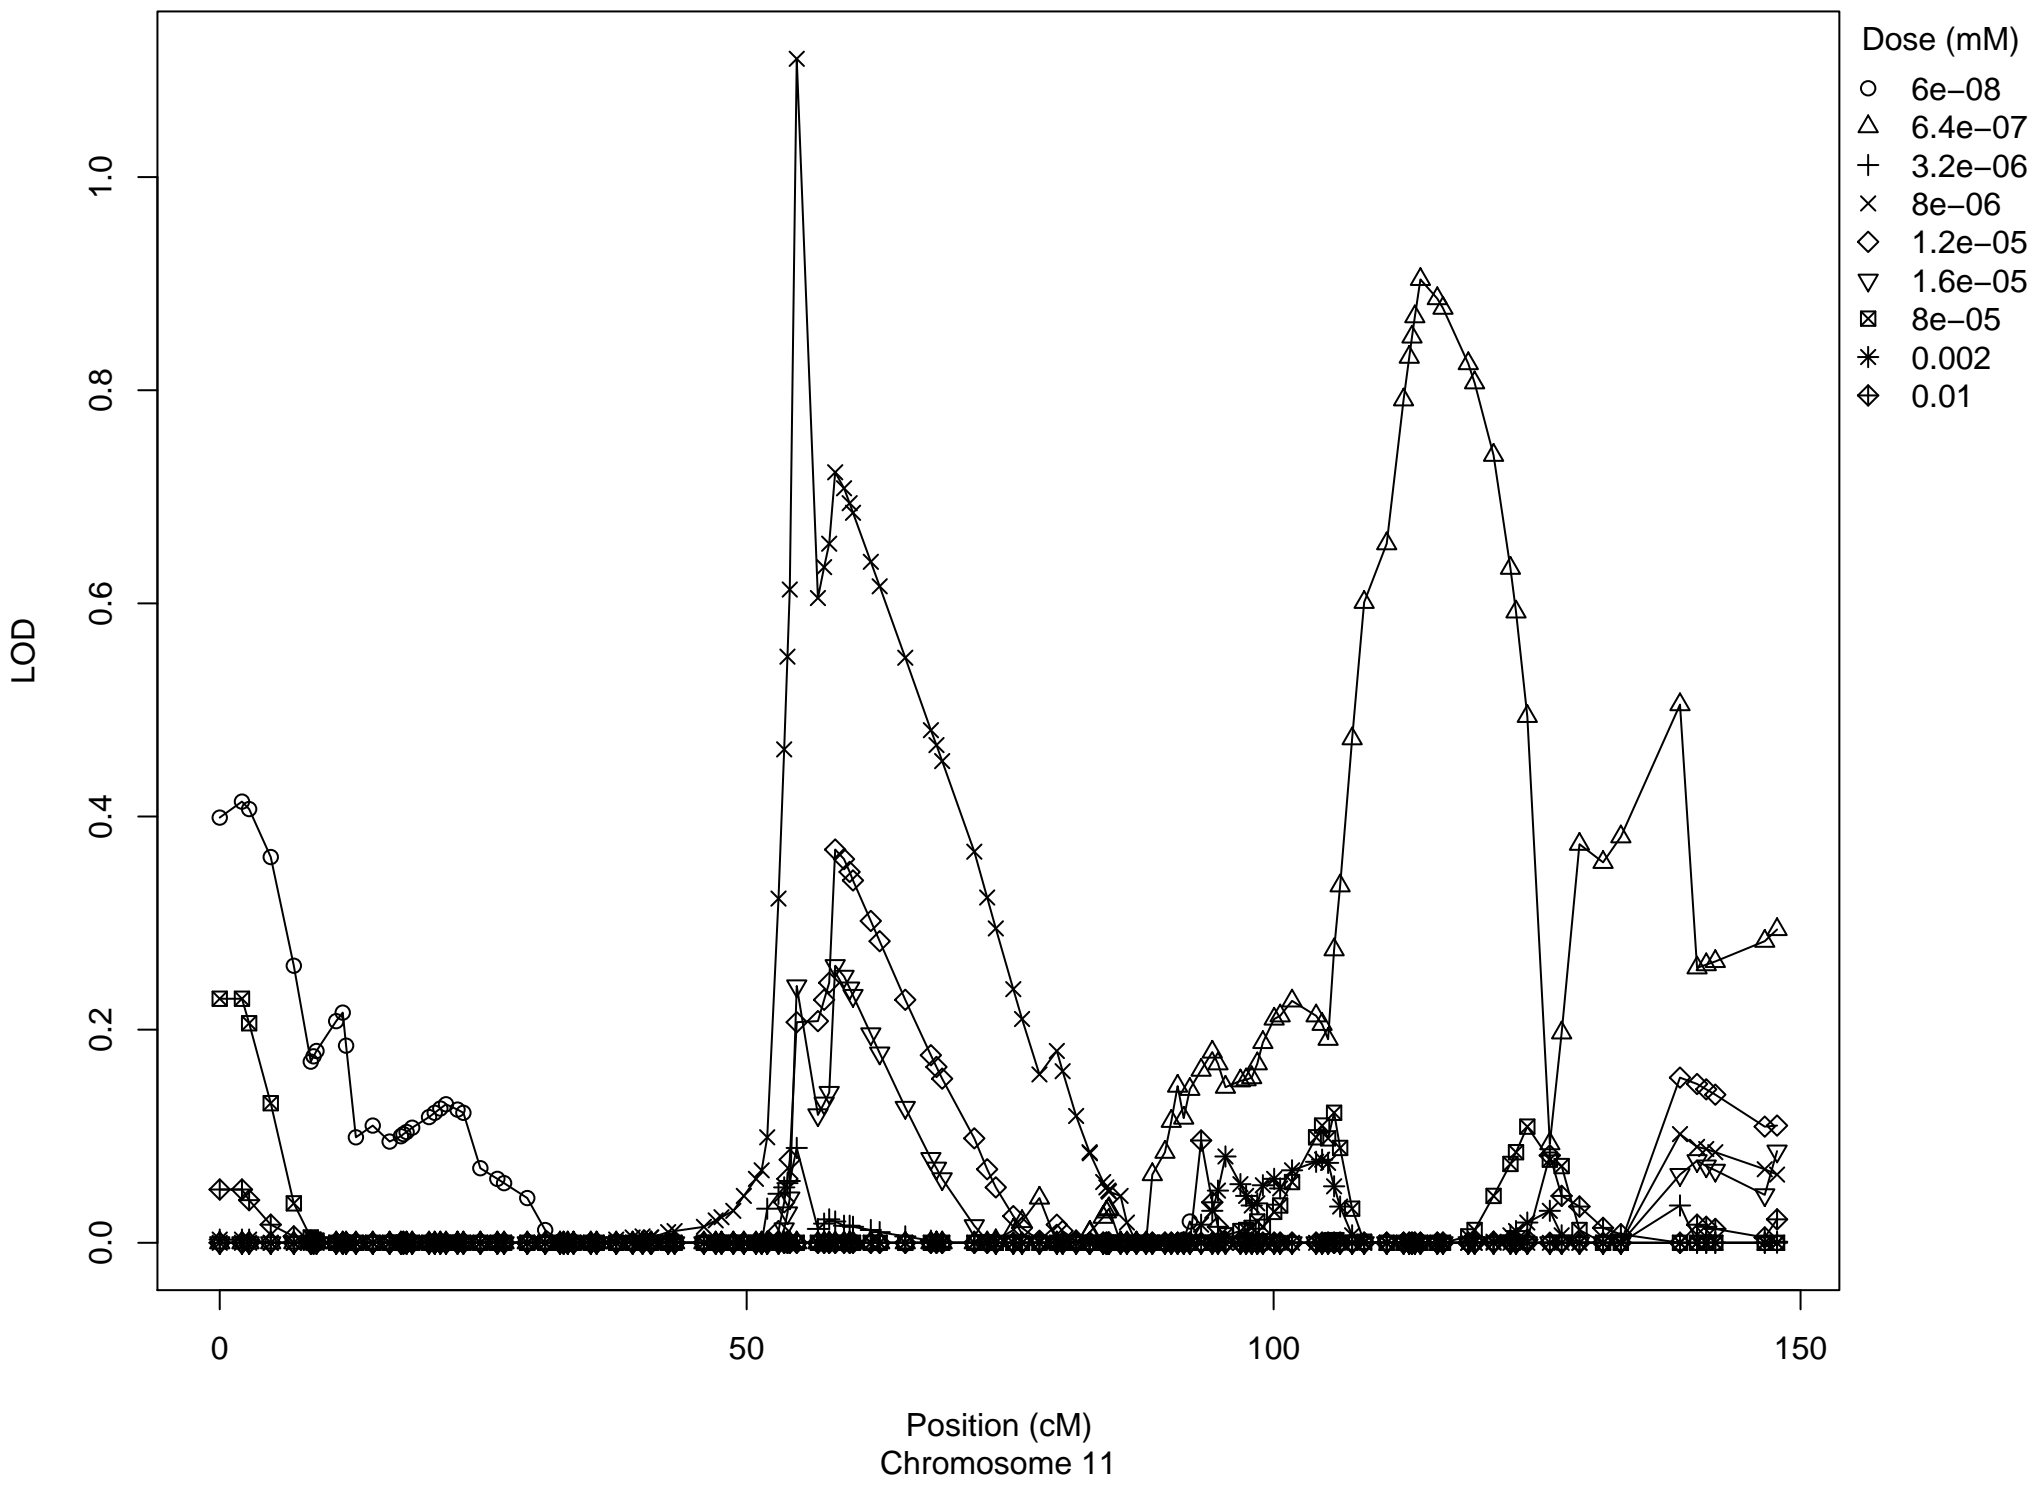

# 9-aminocamptothecin (9AC)

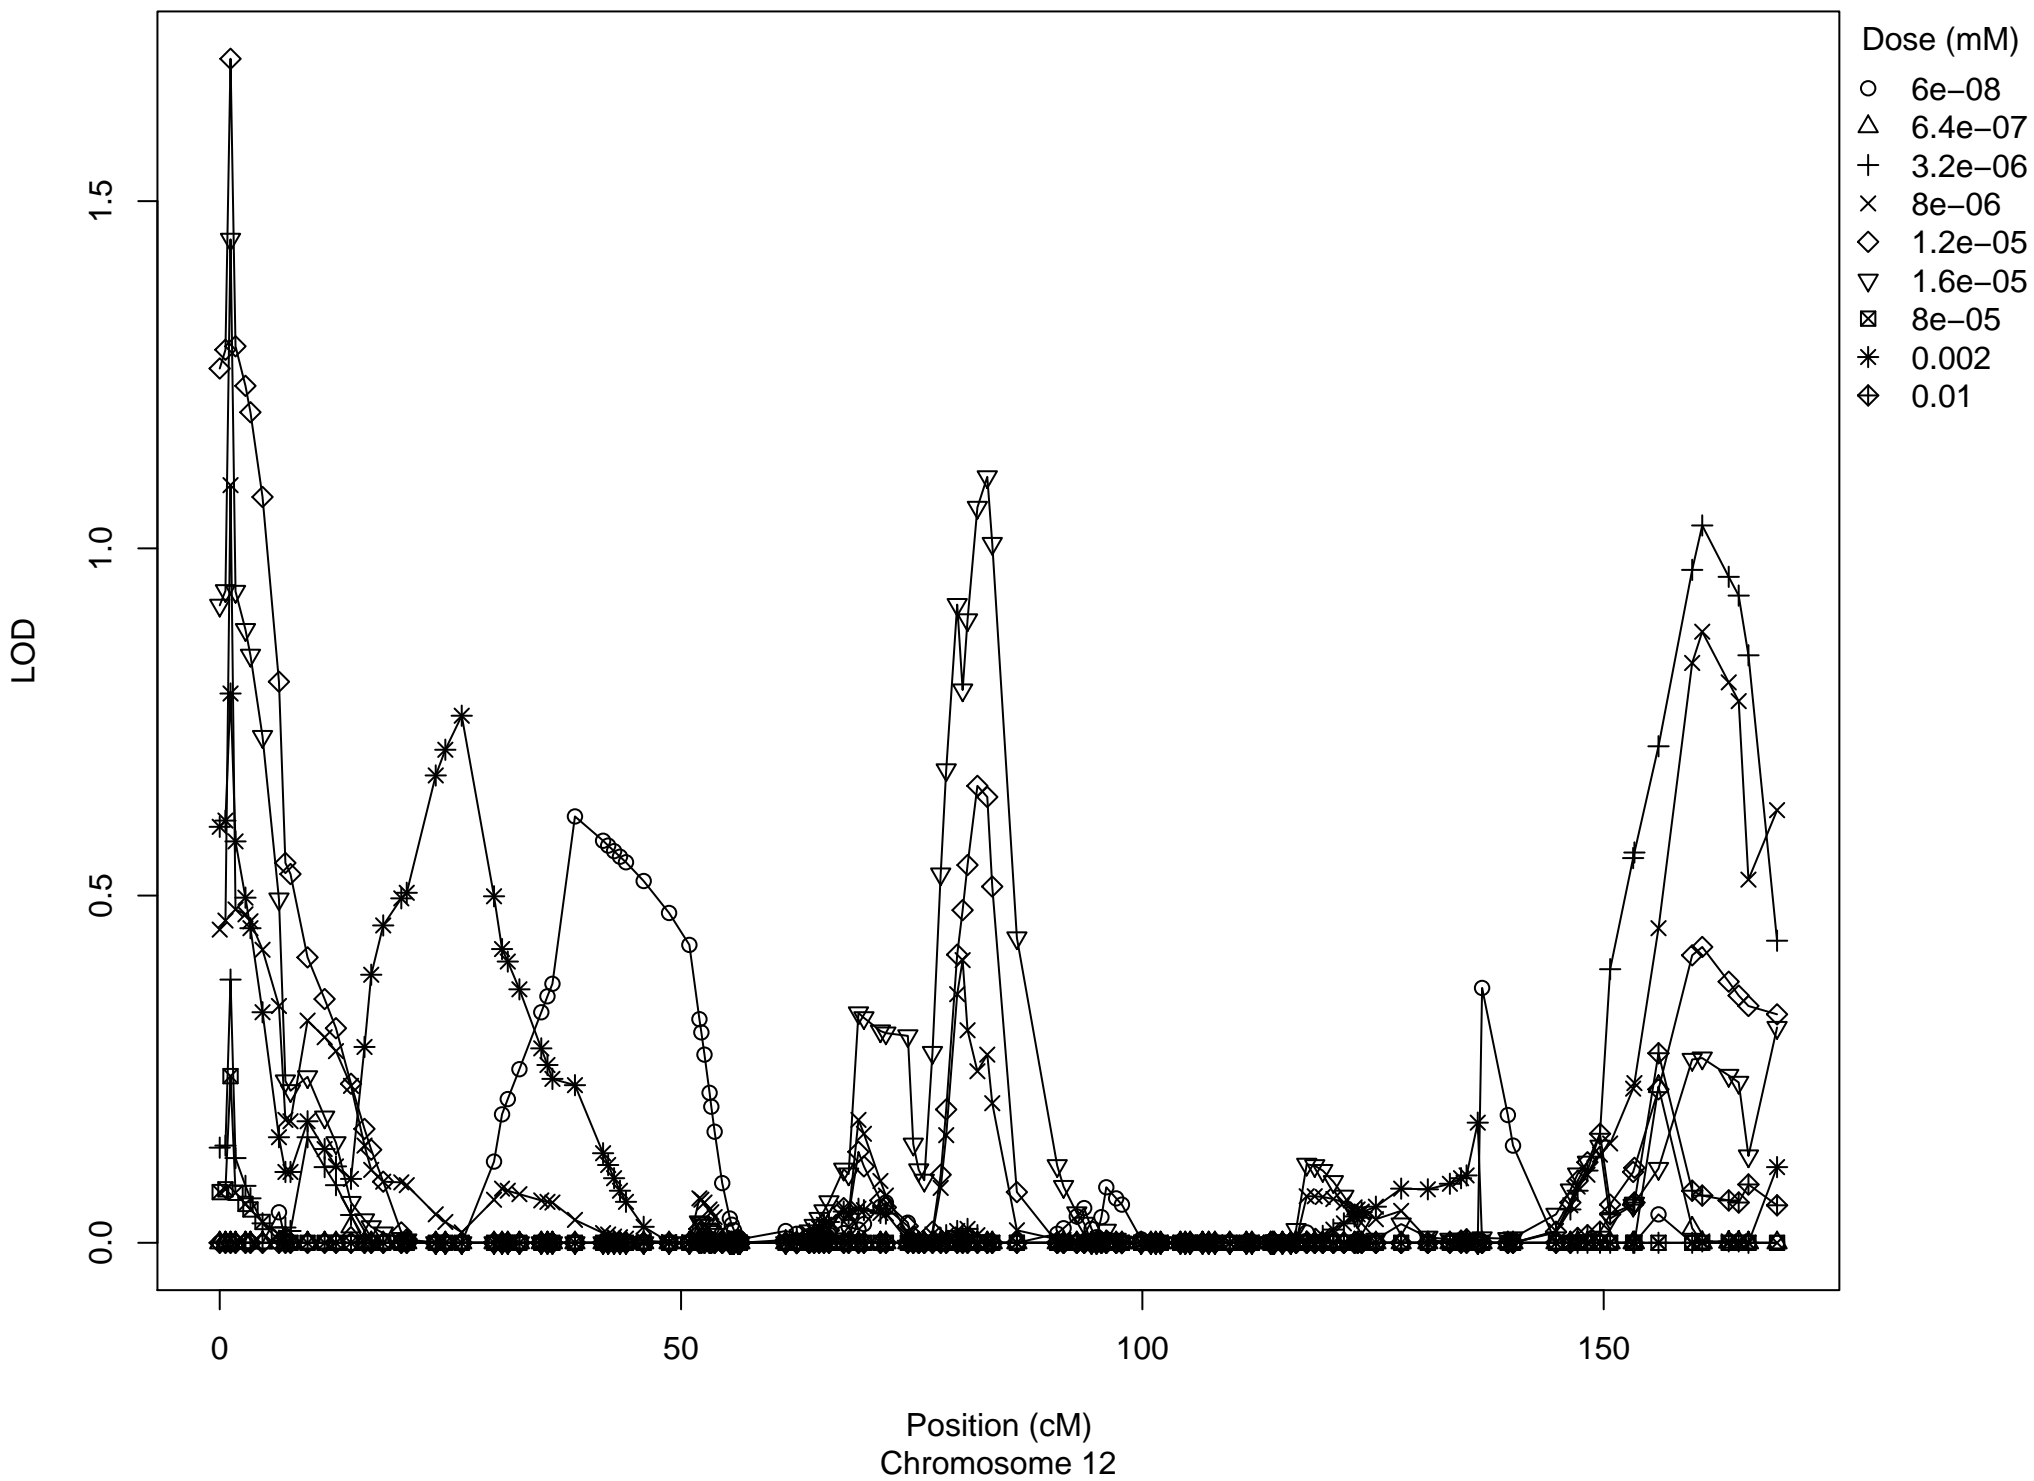



# 9-aminocamptothecin (9AC)

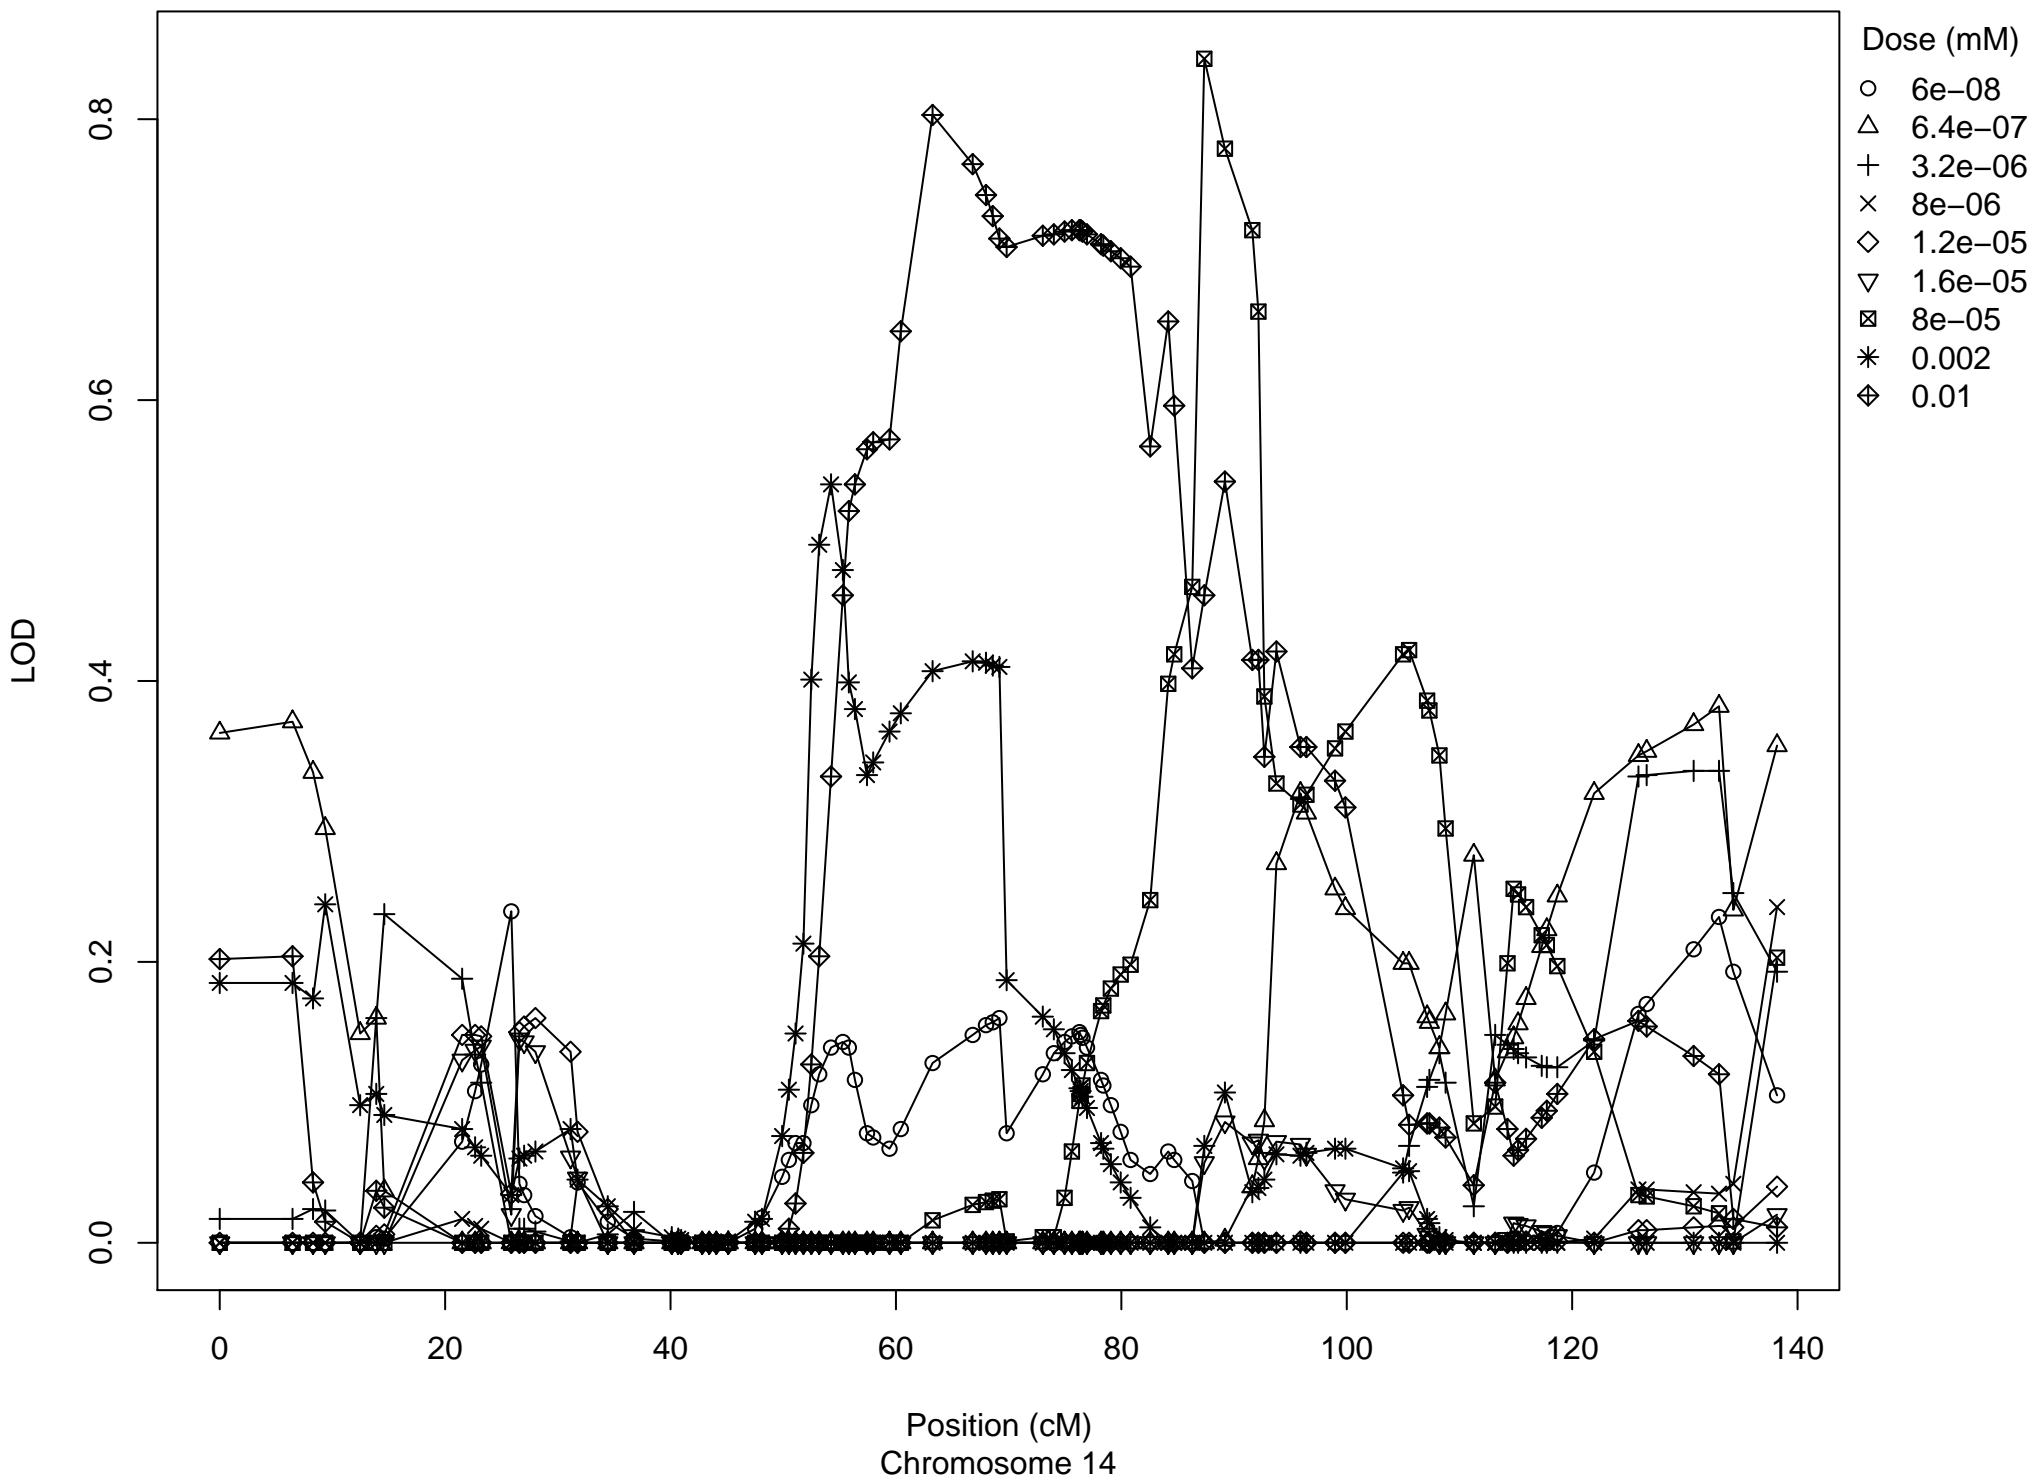



# 9-aminocamptothecin (9AC)

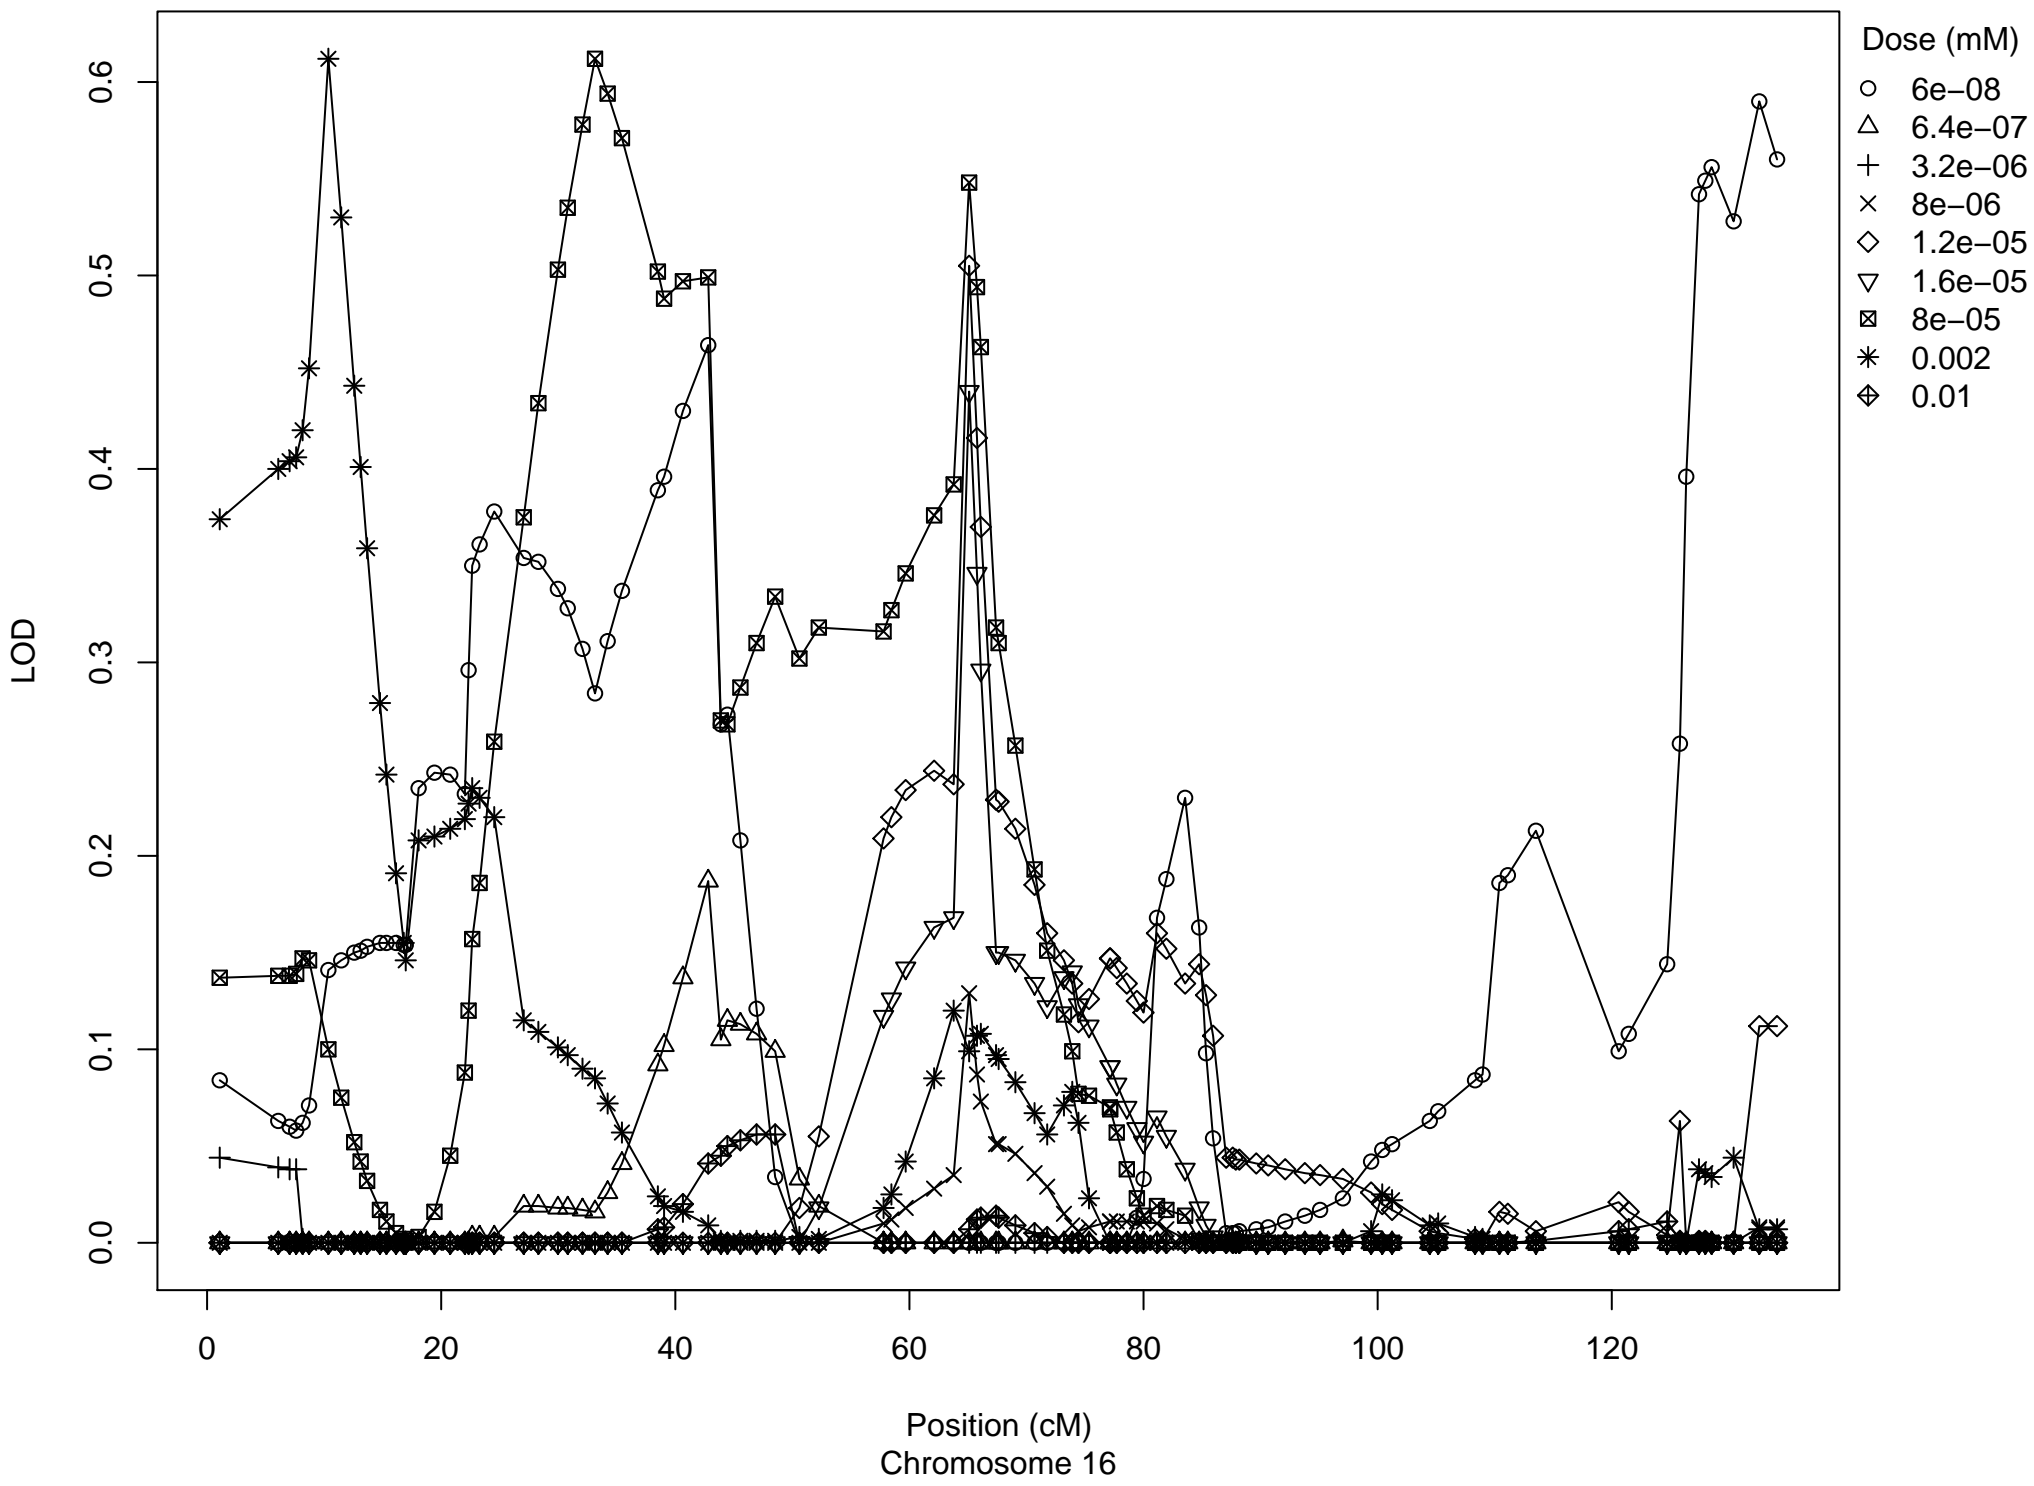







# 9-aminocamptothecin (9AC)

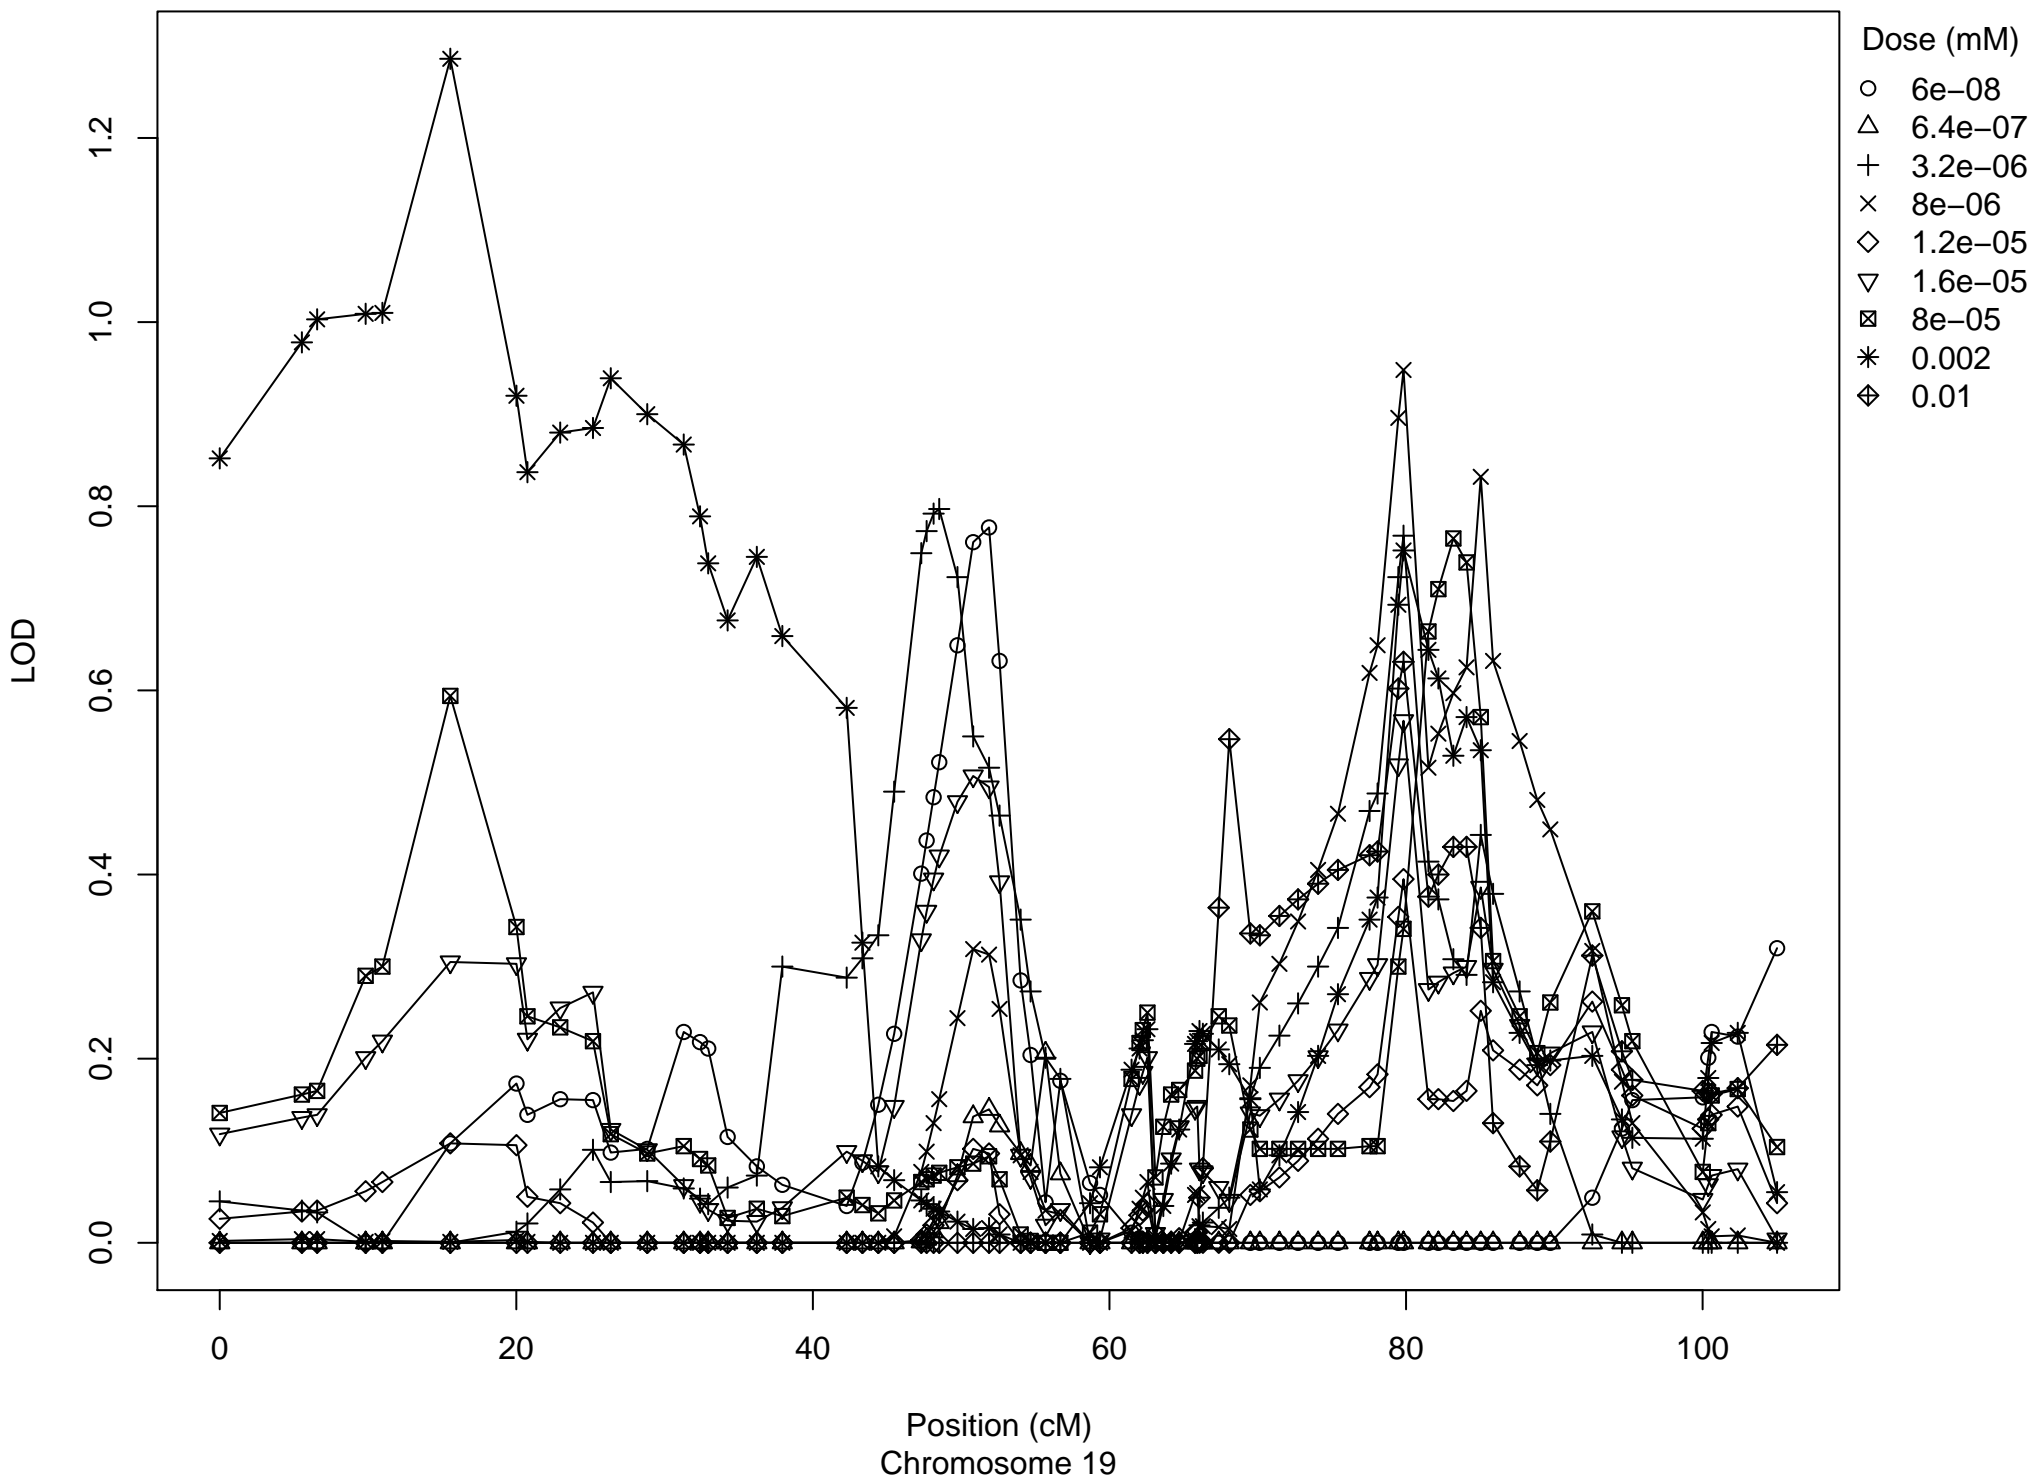





# 9-aminocamptothecin (9AC)

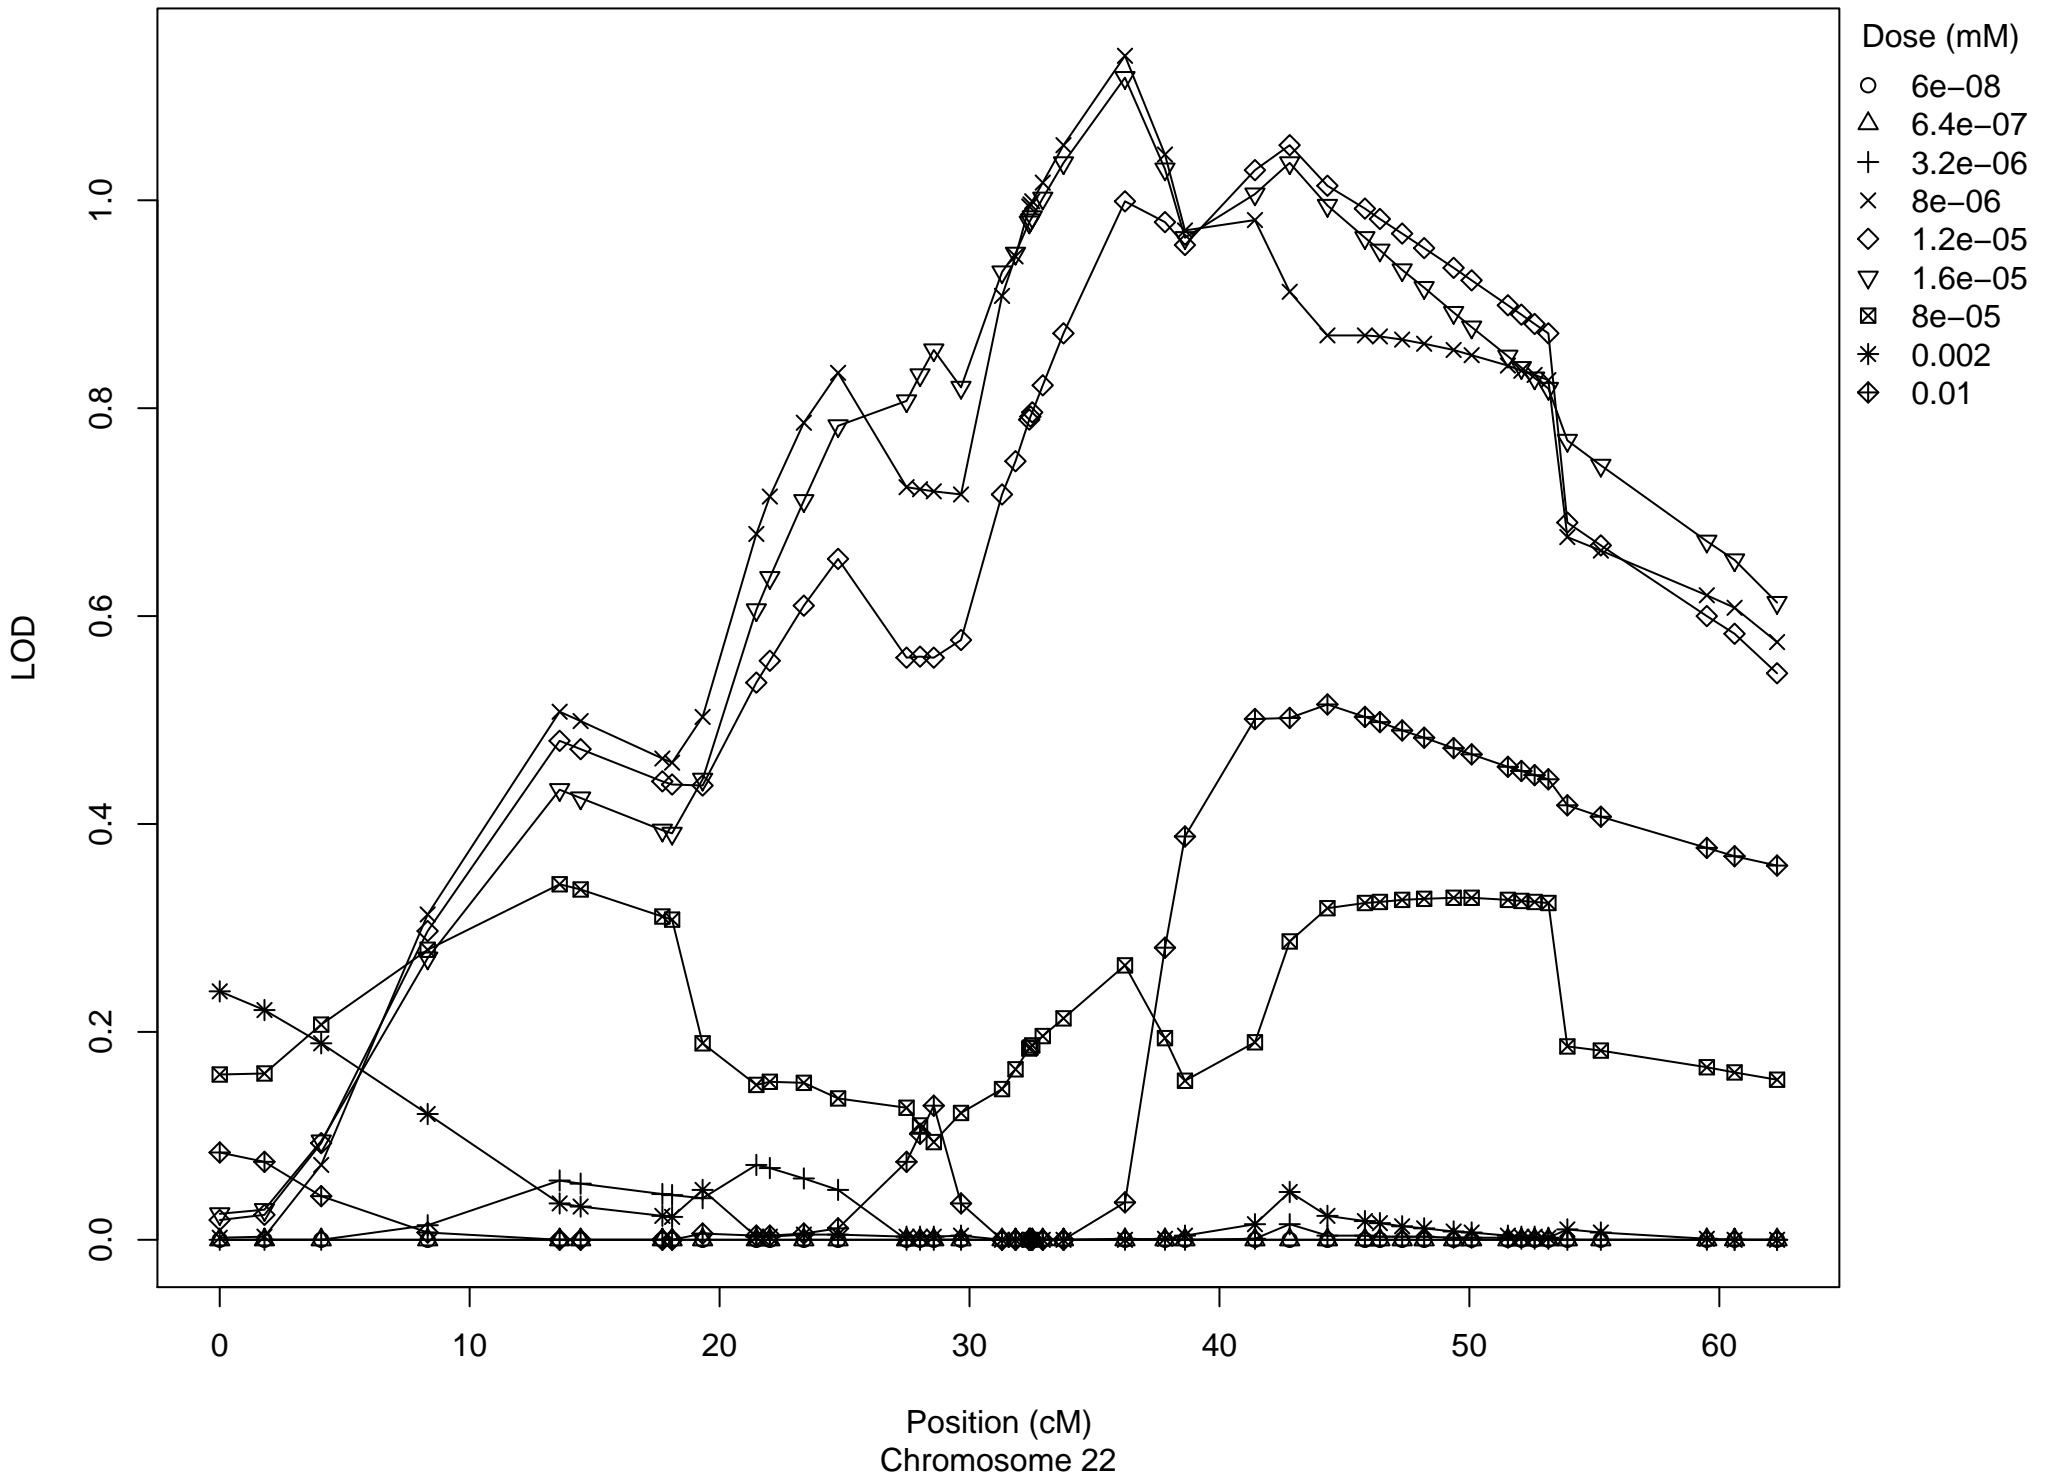

# 9-nitrocamptothecin (9NC)

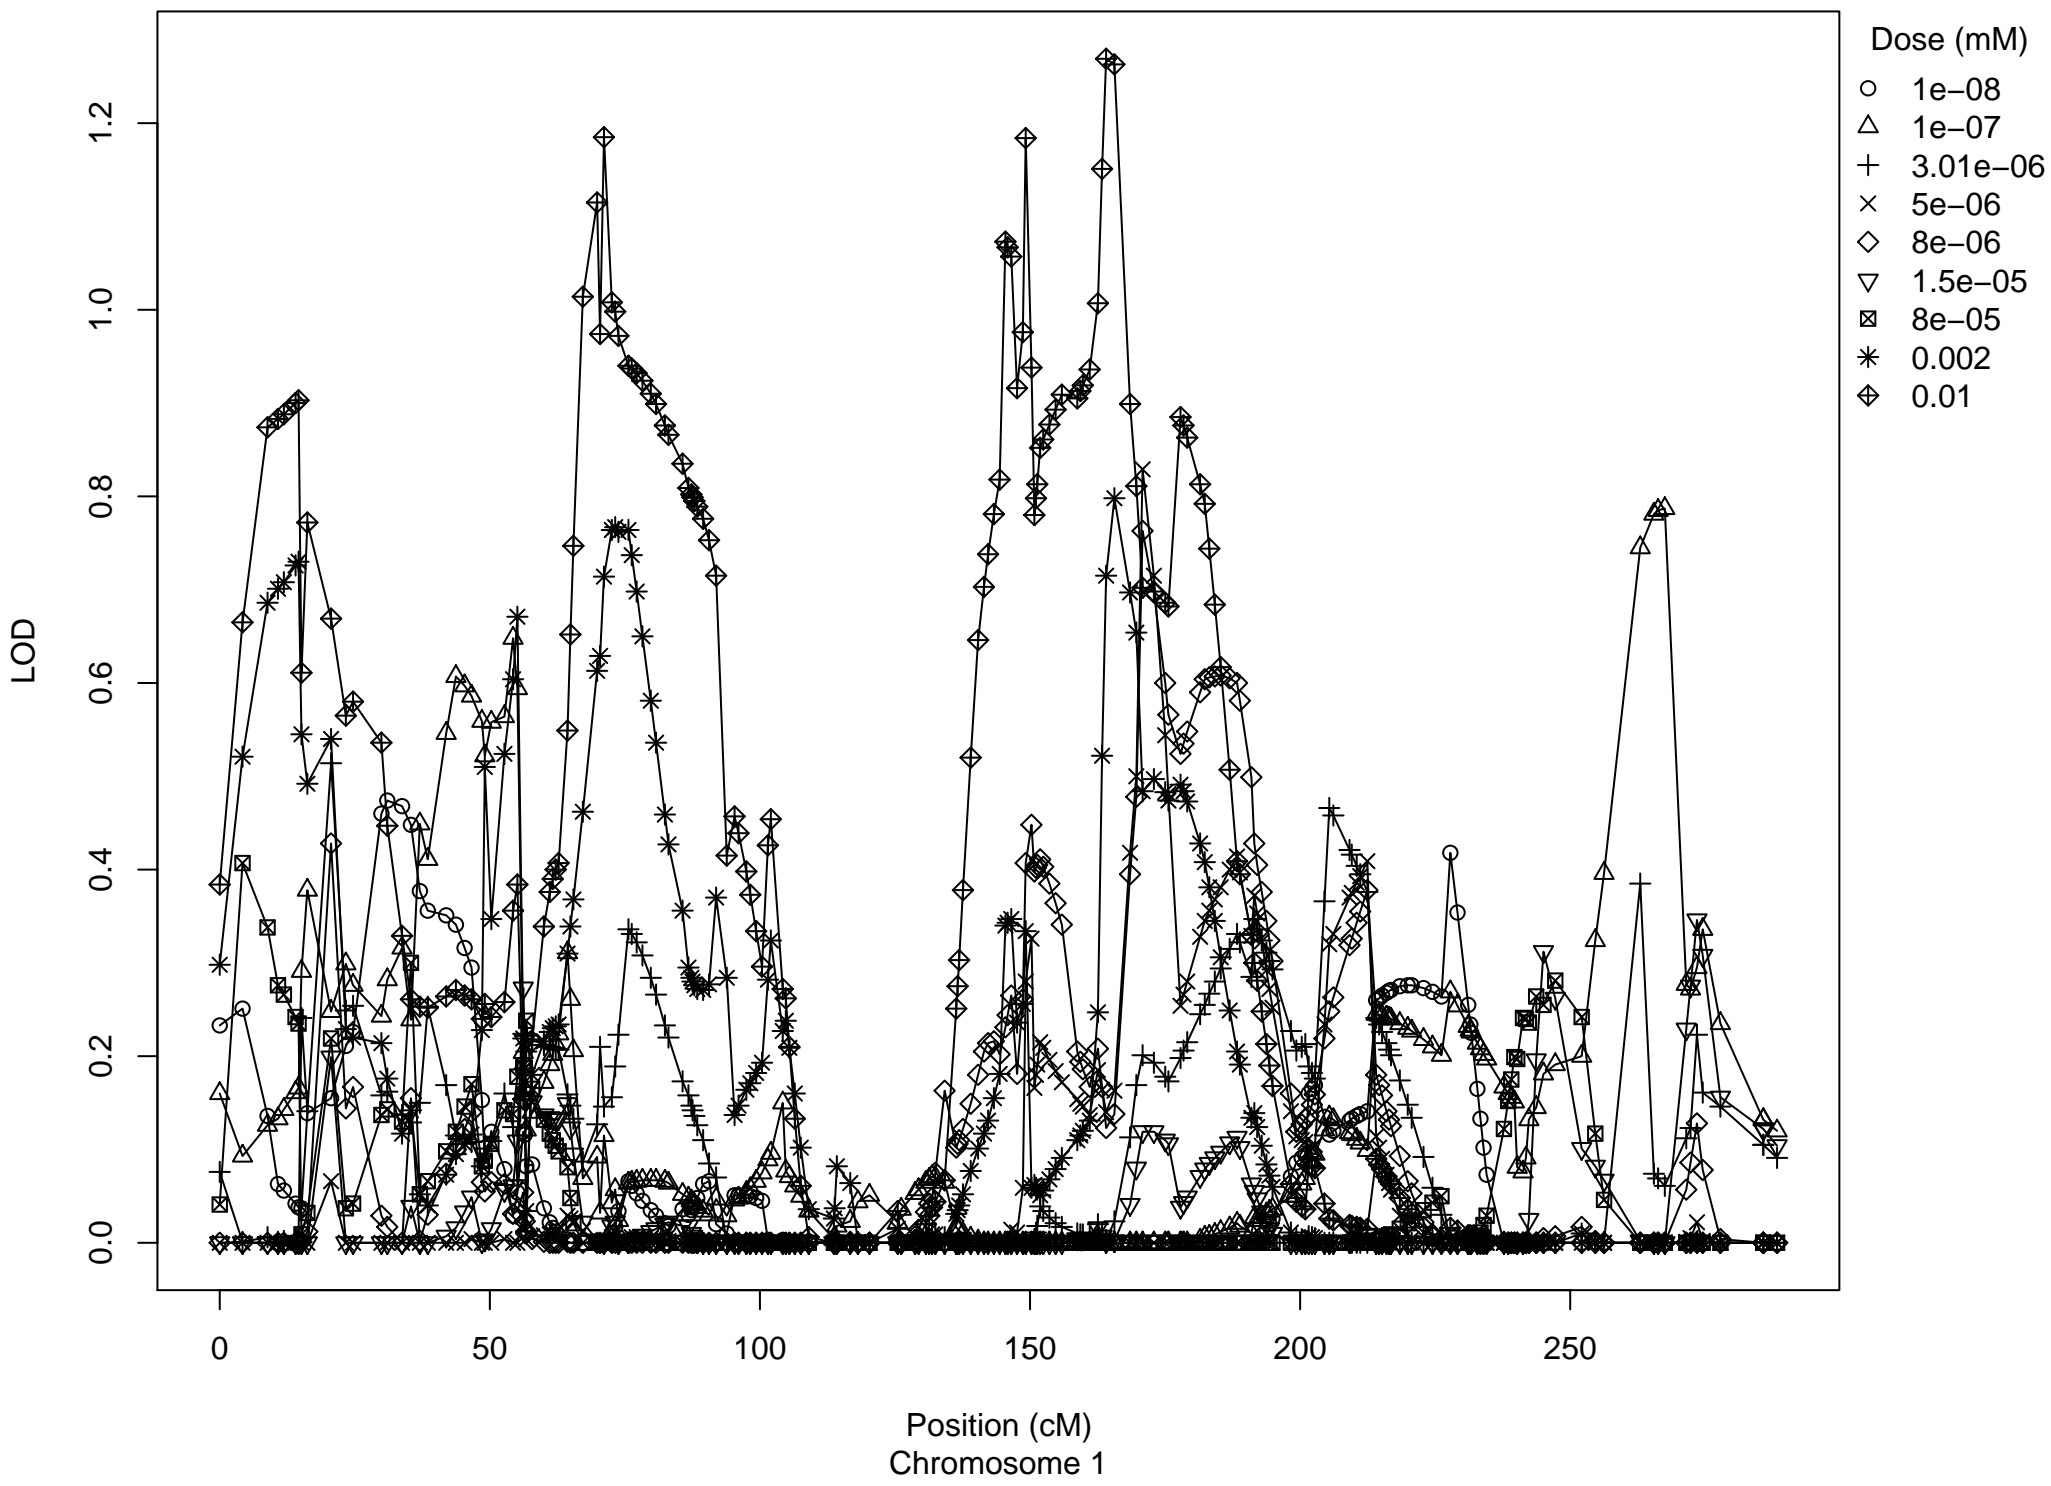

# 9-nitrocamptothecin (9NC)

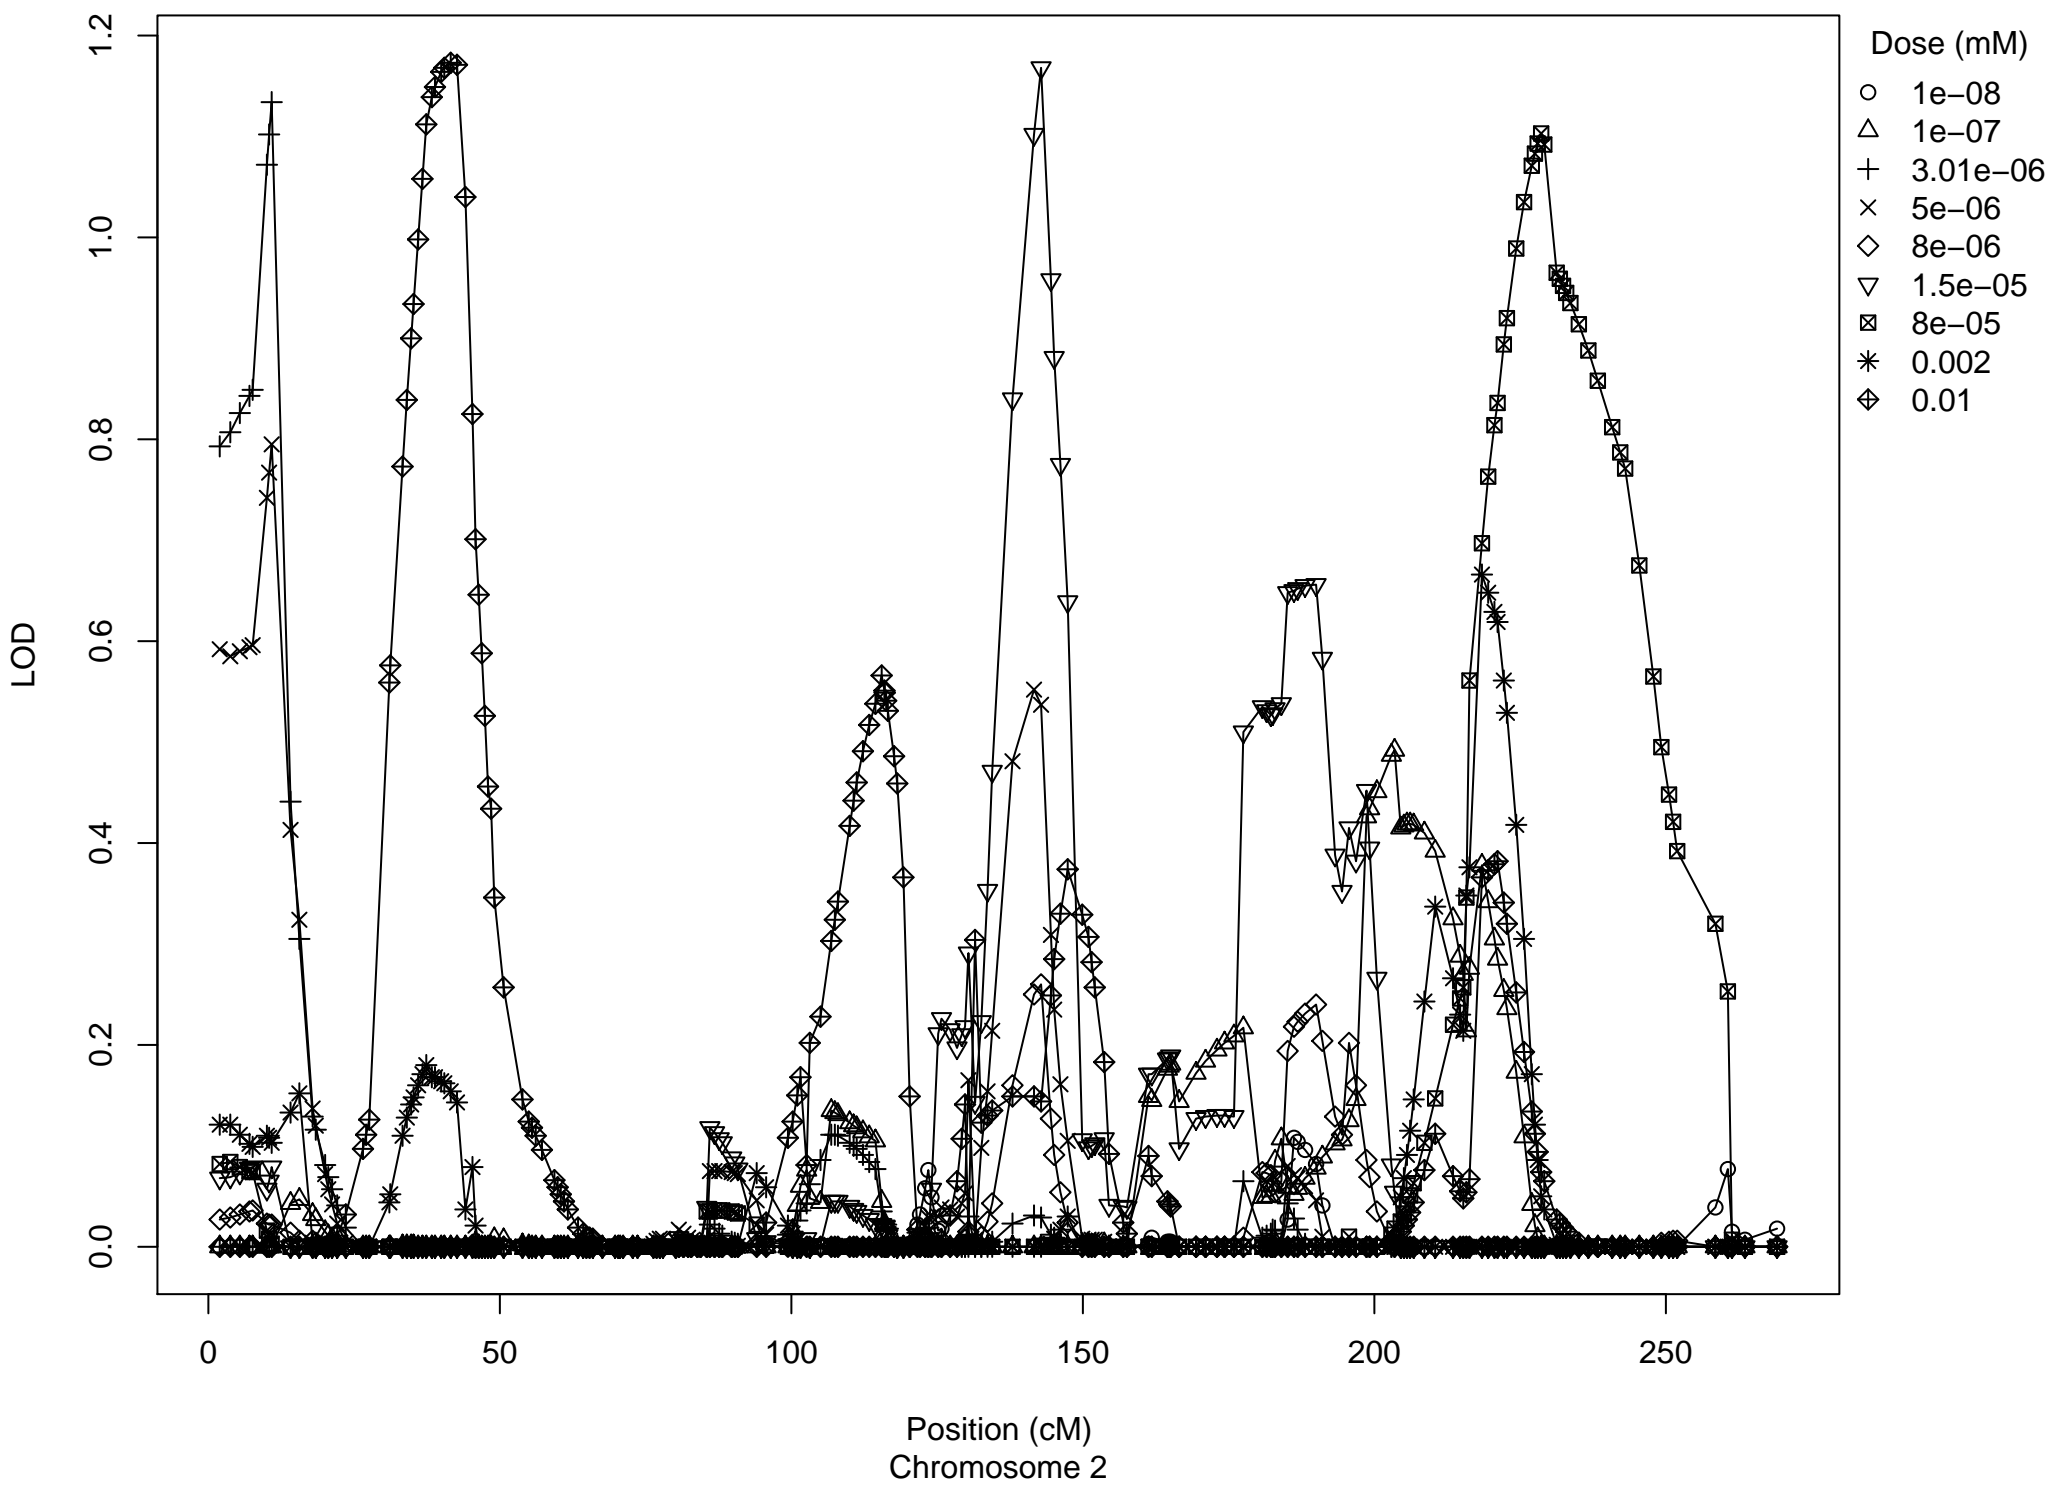

# 9-nitrocamptothecin (9NC)

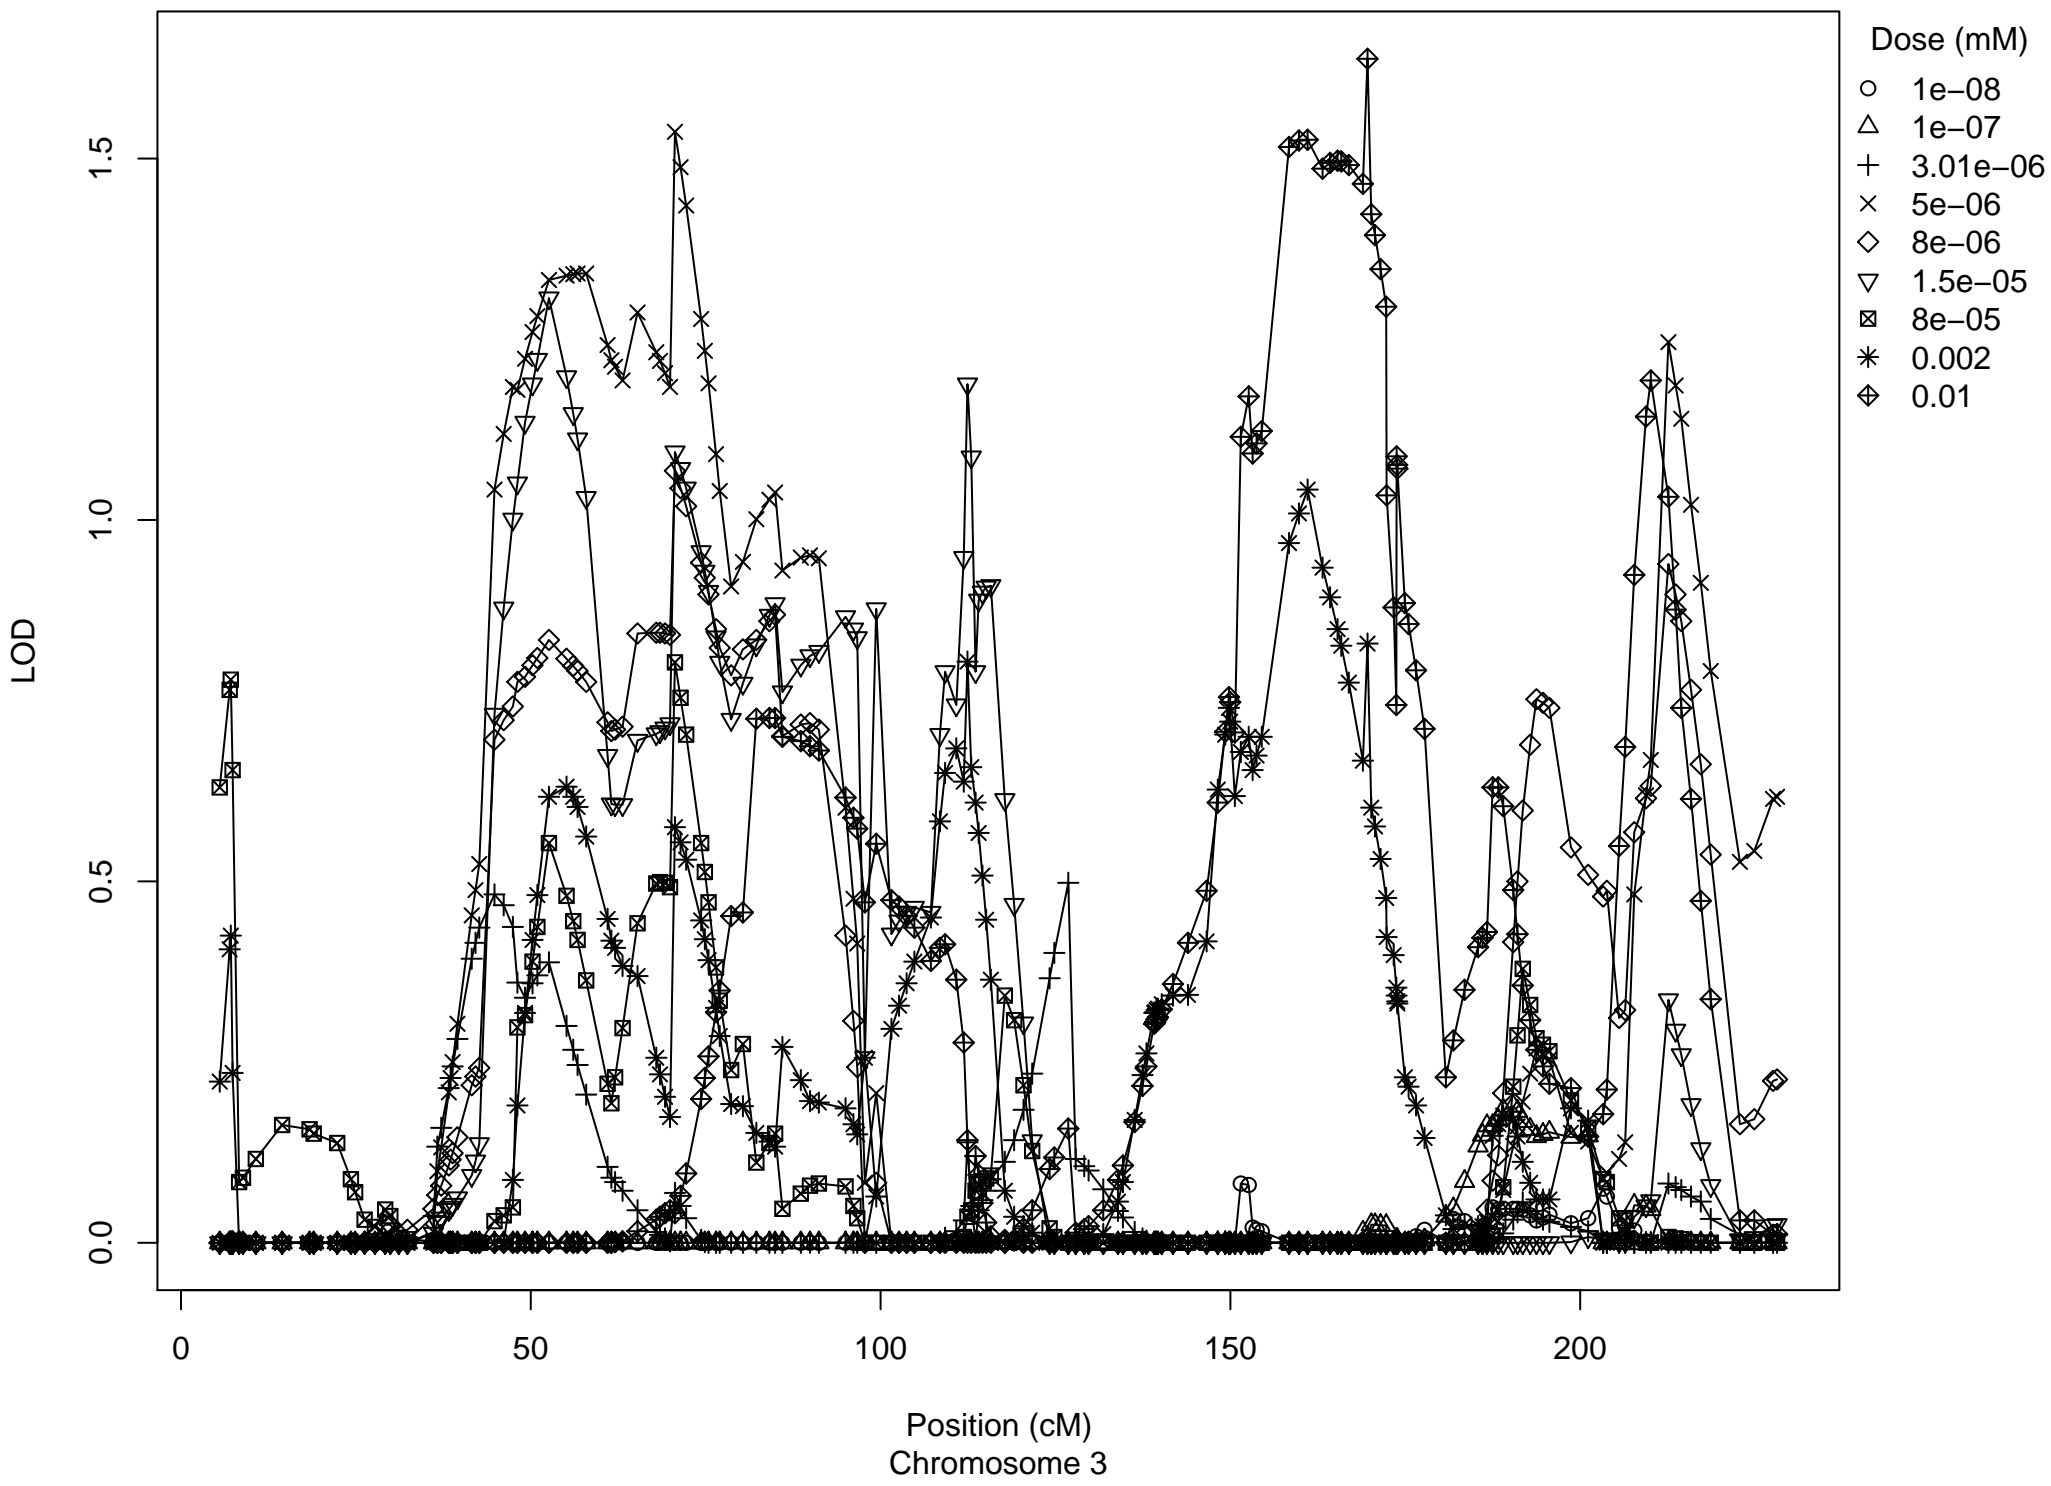

# 9-nitrocamptothecin (9NC)

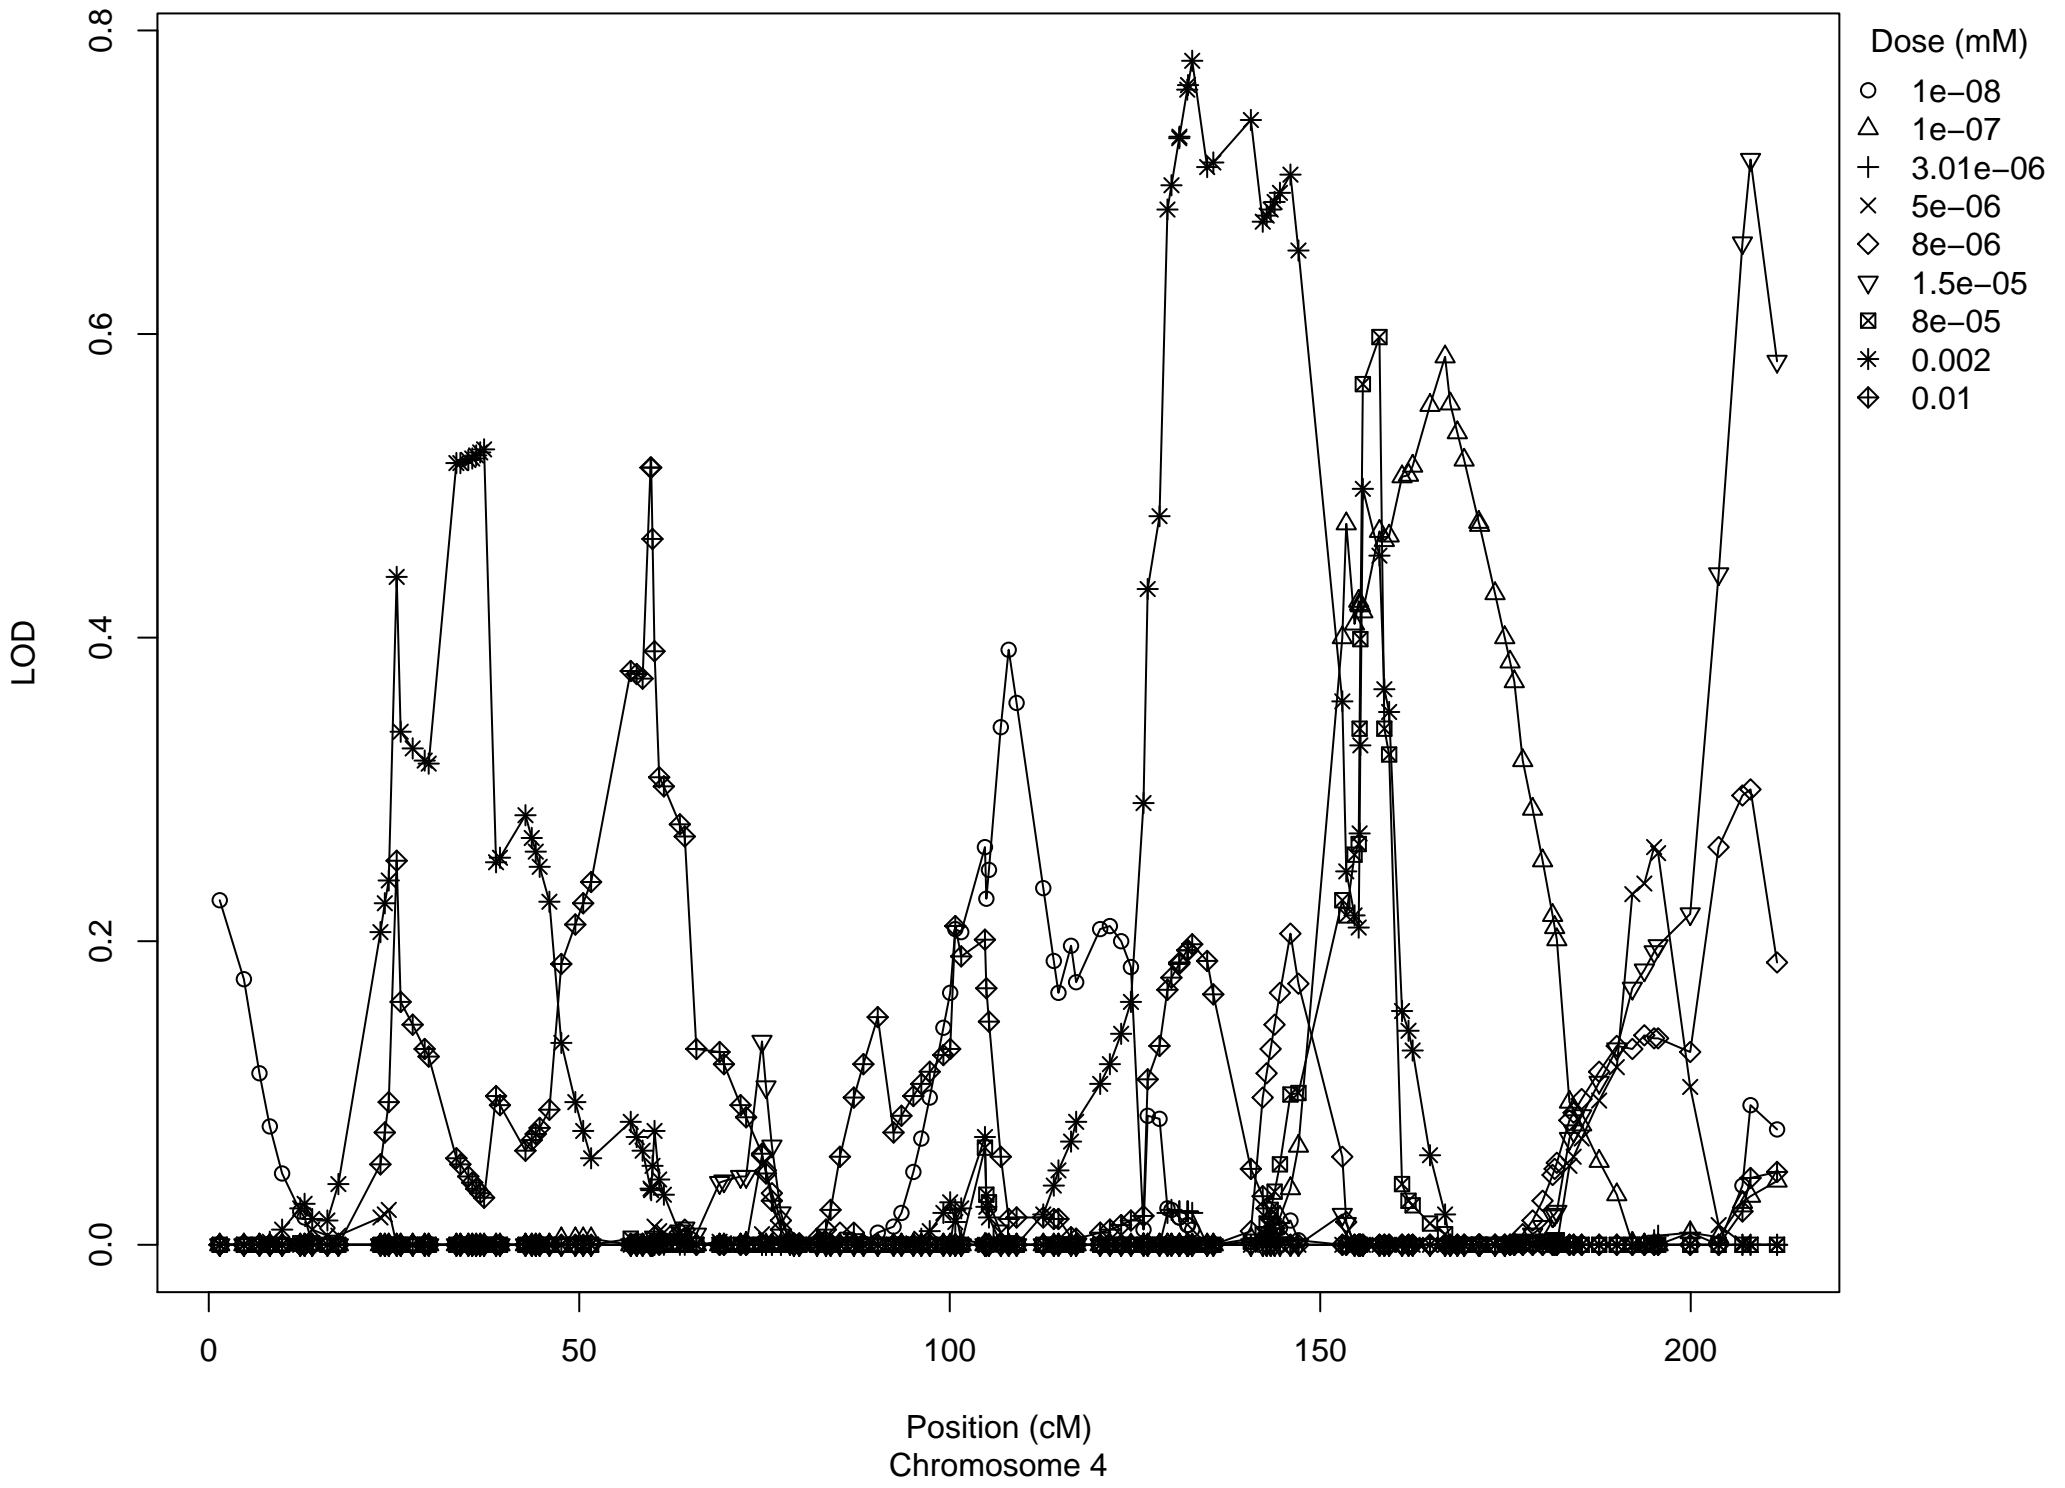



# 9-nitrocamptothecin (9NC)

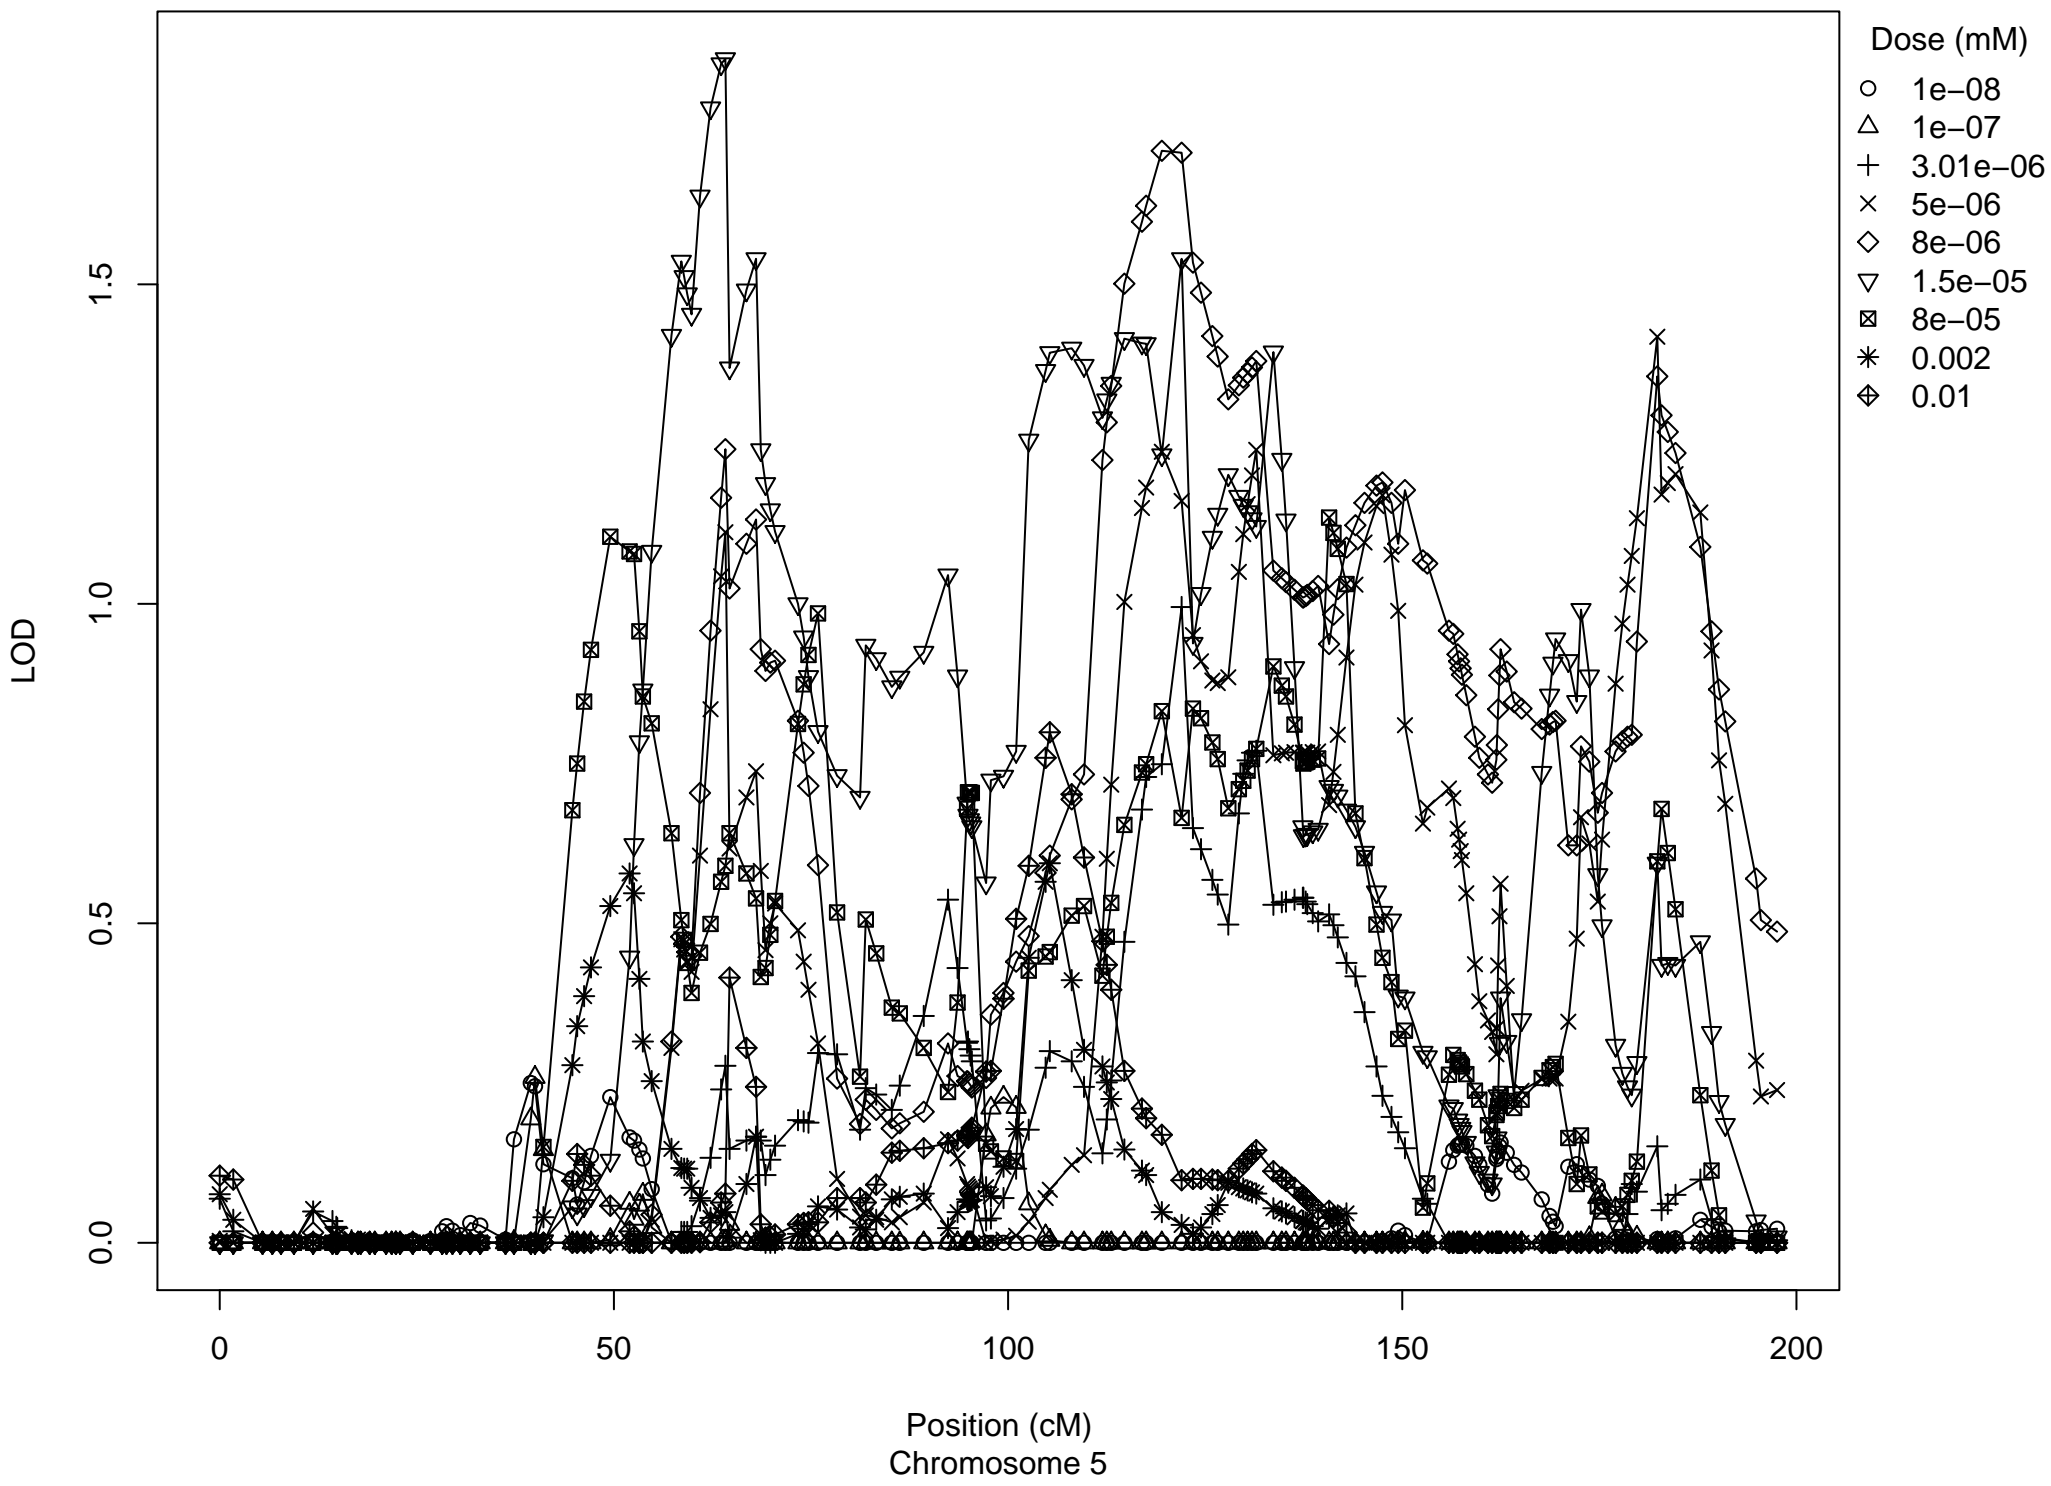

# 9-nitrocamptothecin (9NC)

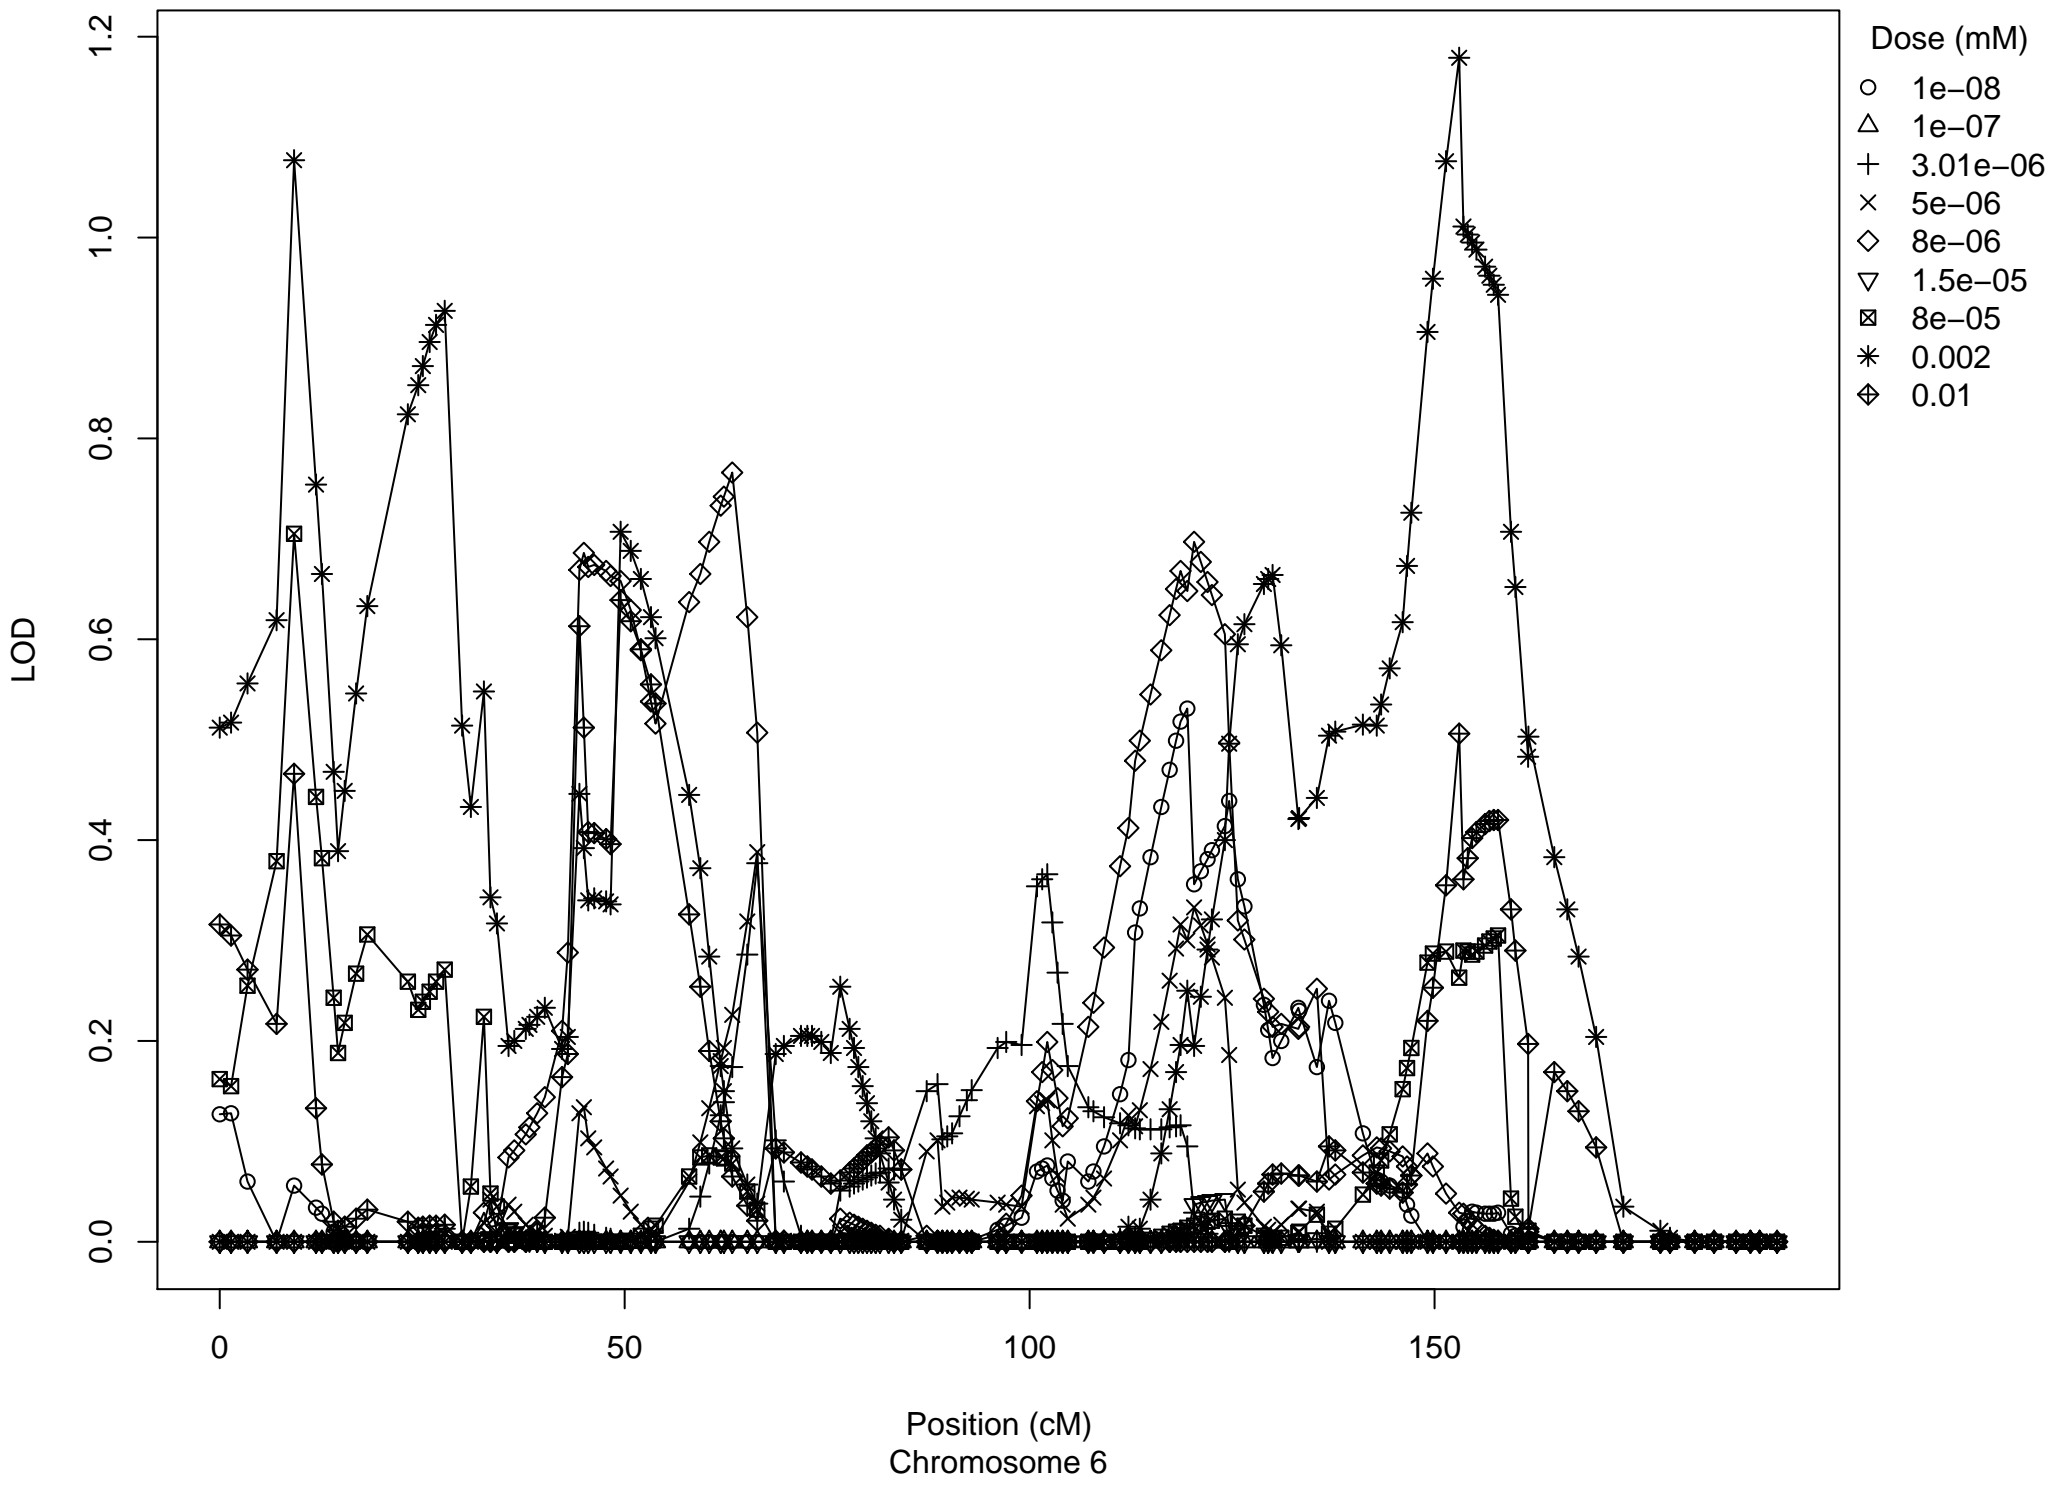

# 9-nitrocamptothecin (9NC)

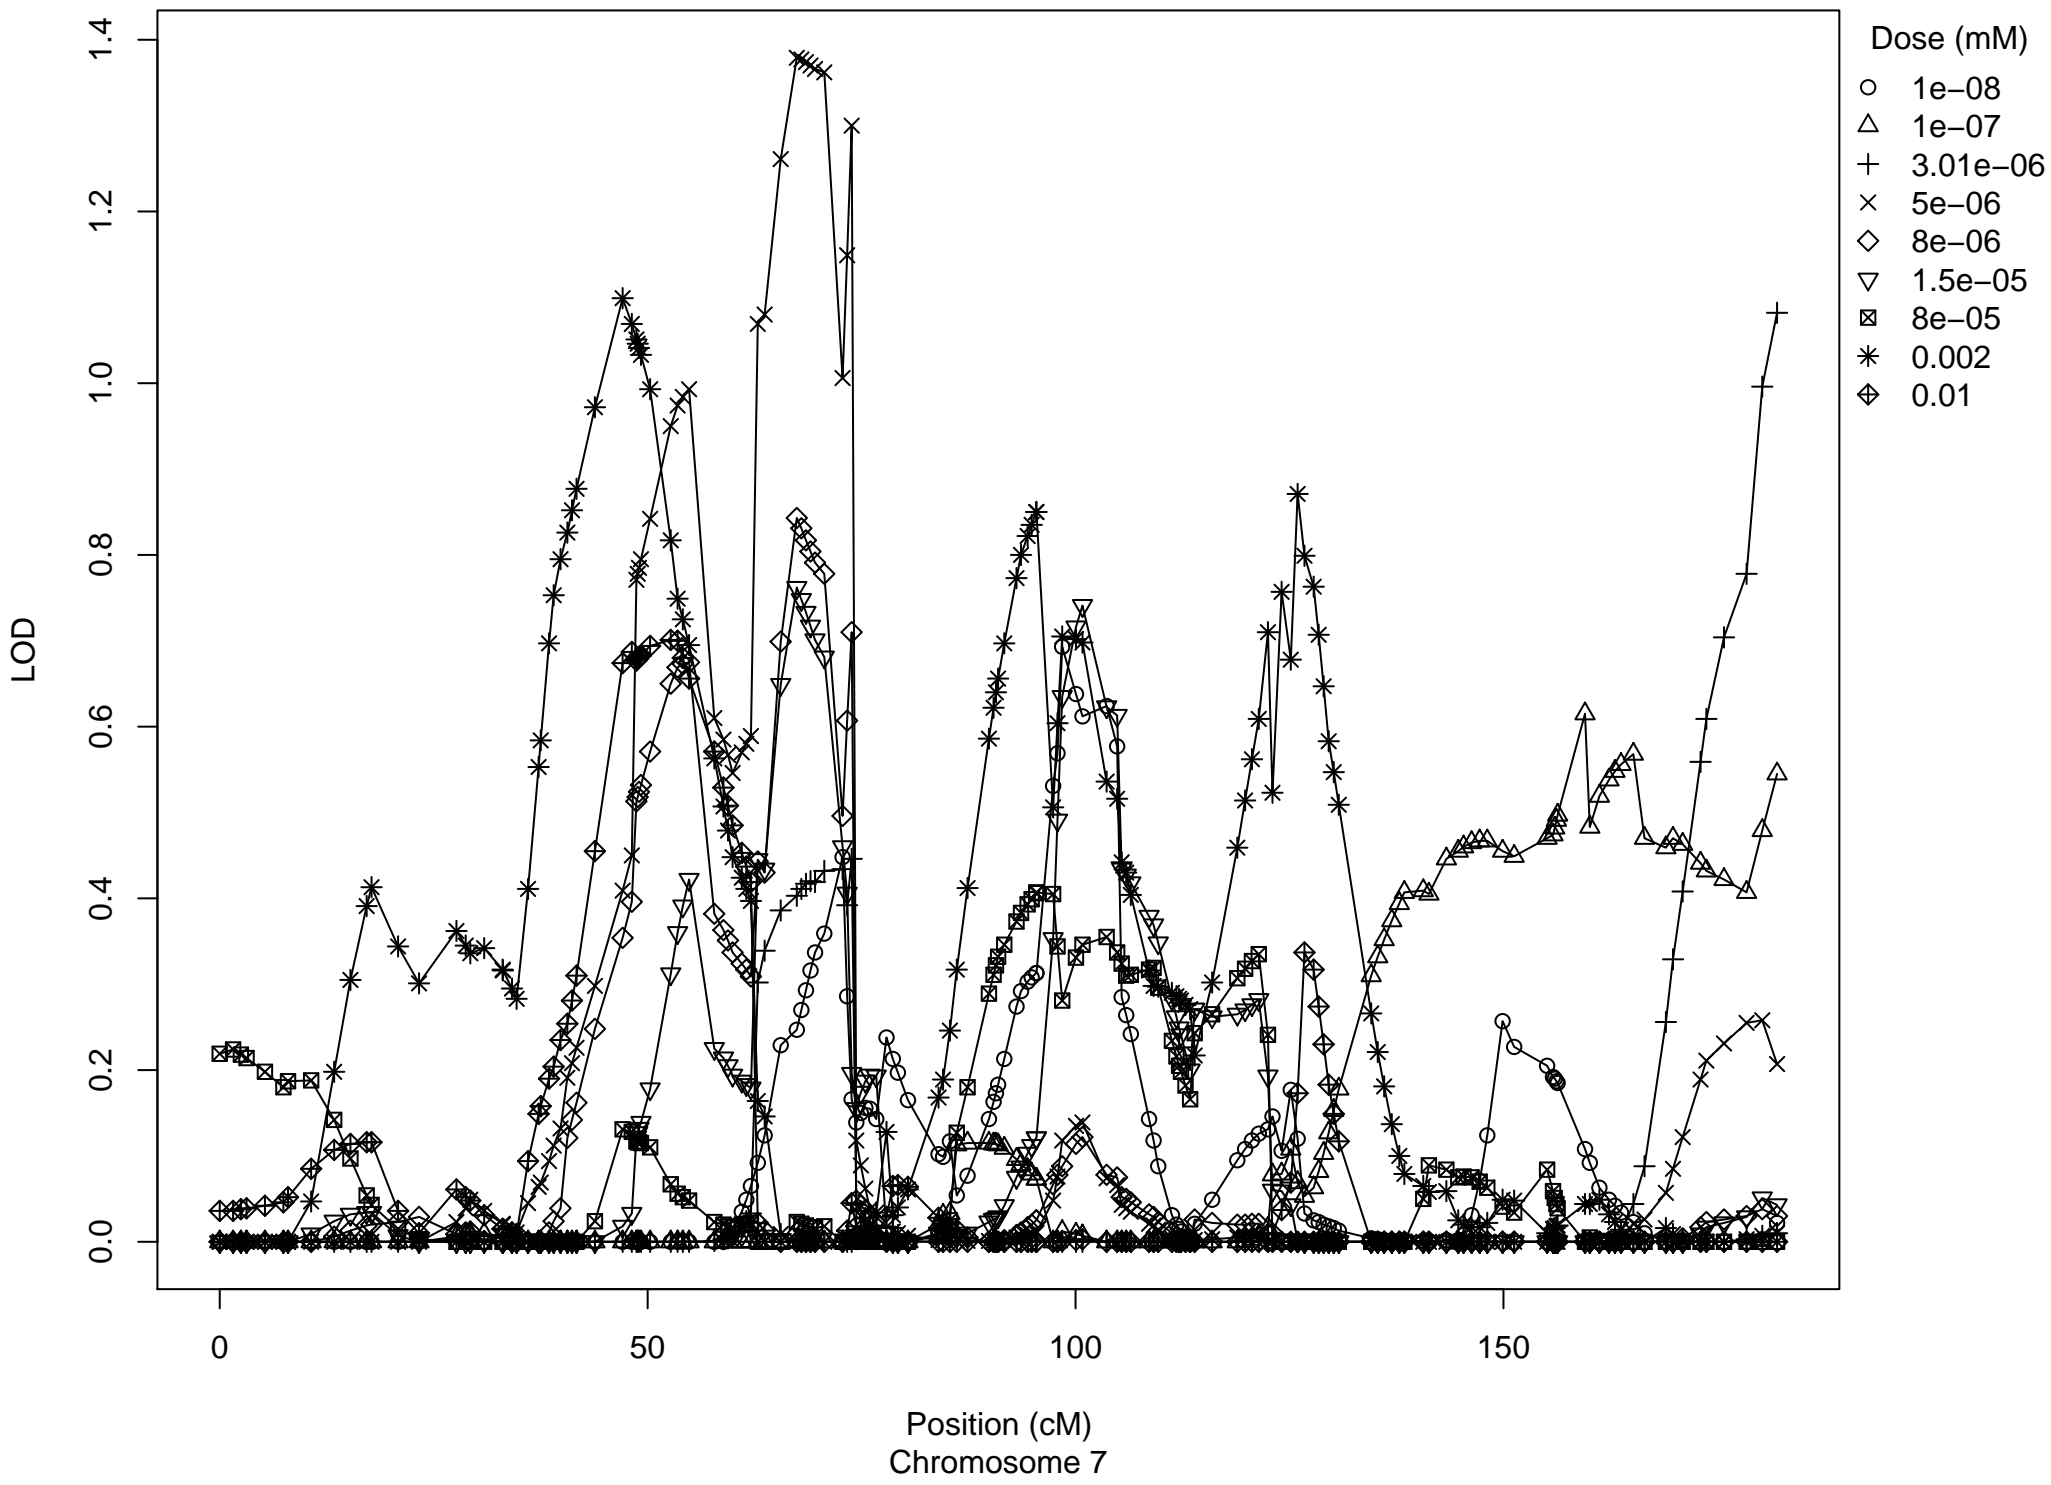

# 9-nitrocamptothecin (9NC)

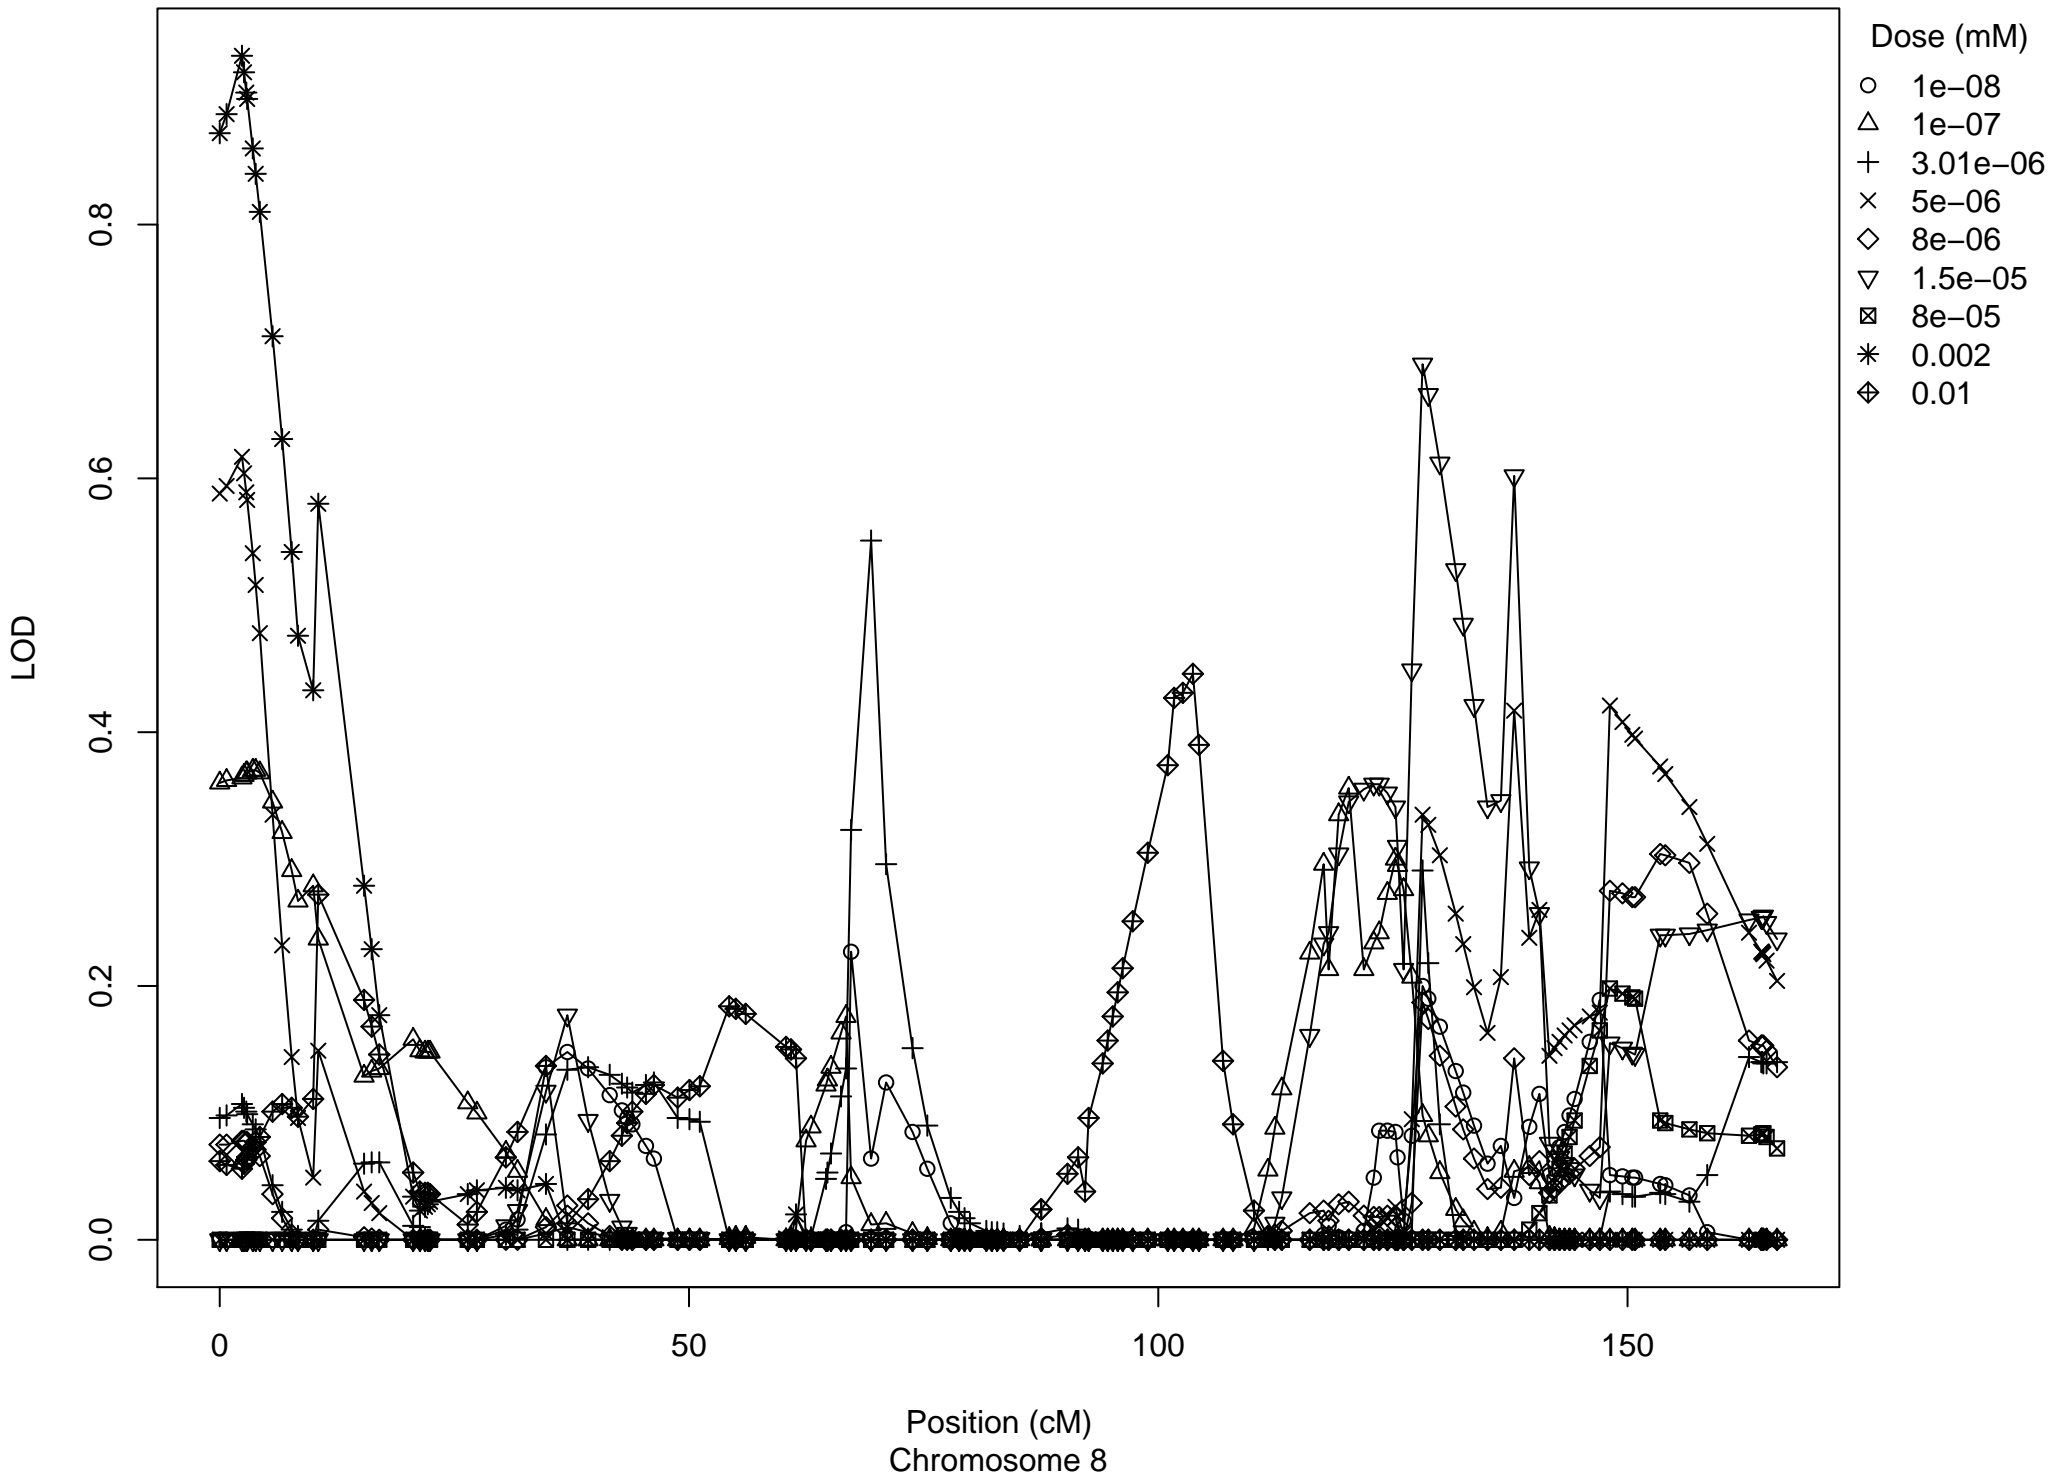

# 9-nitrocamptothecin (9NC)

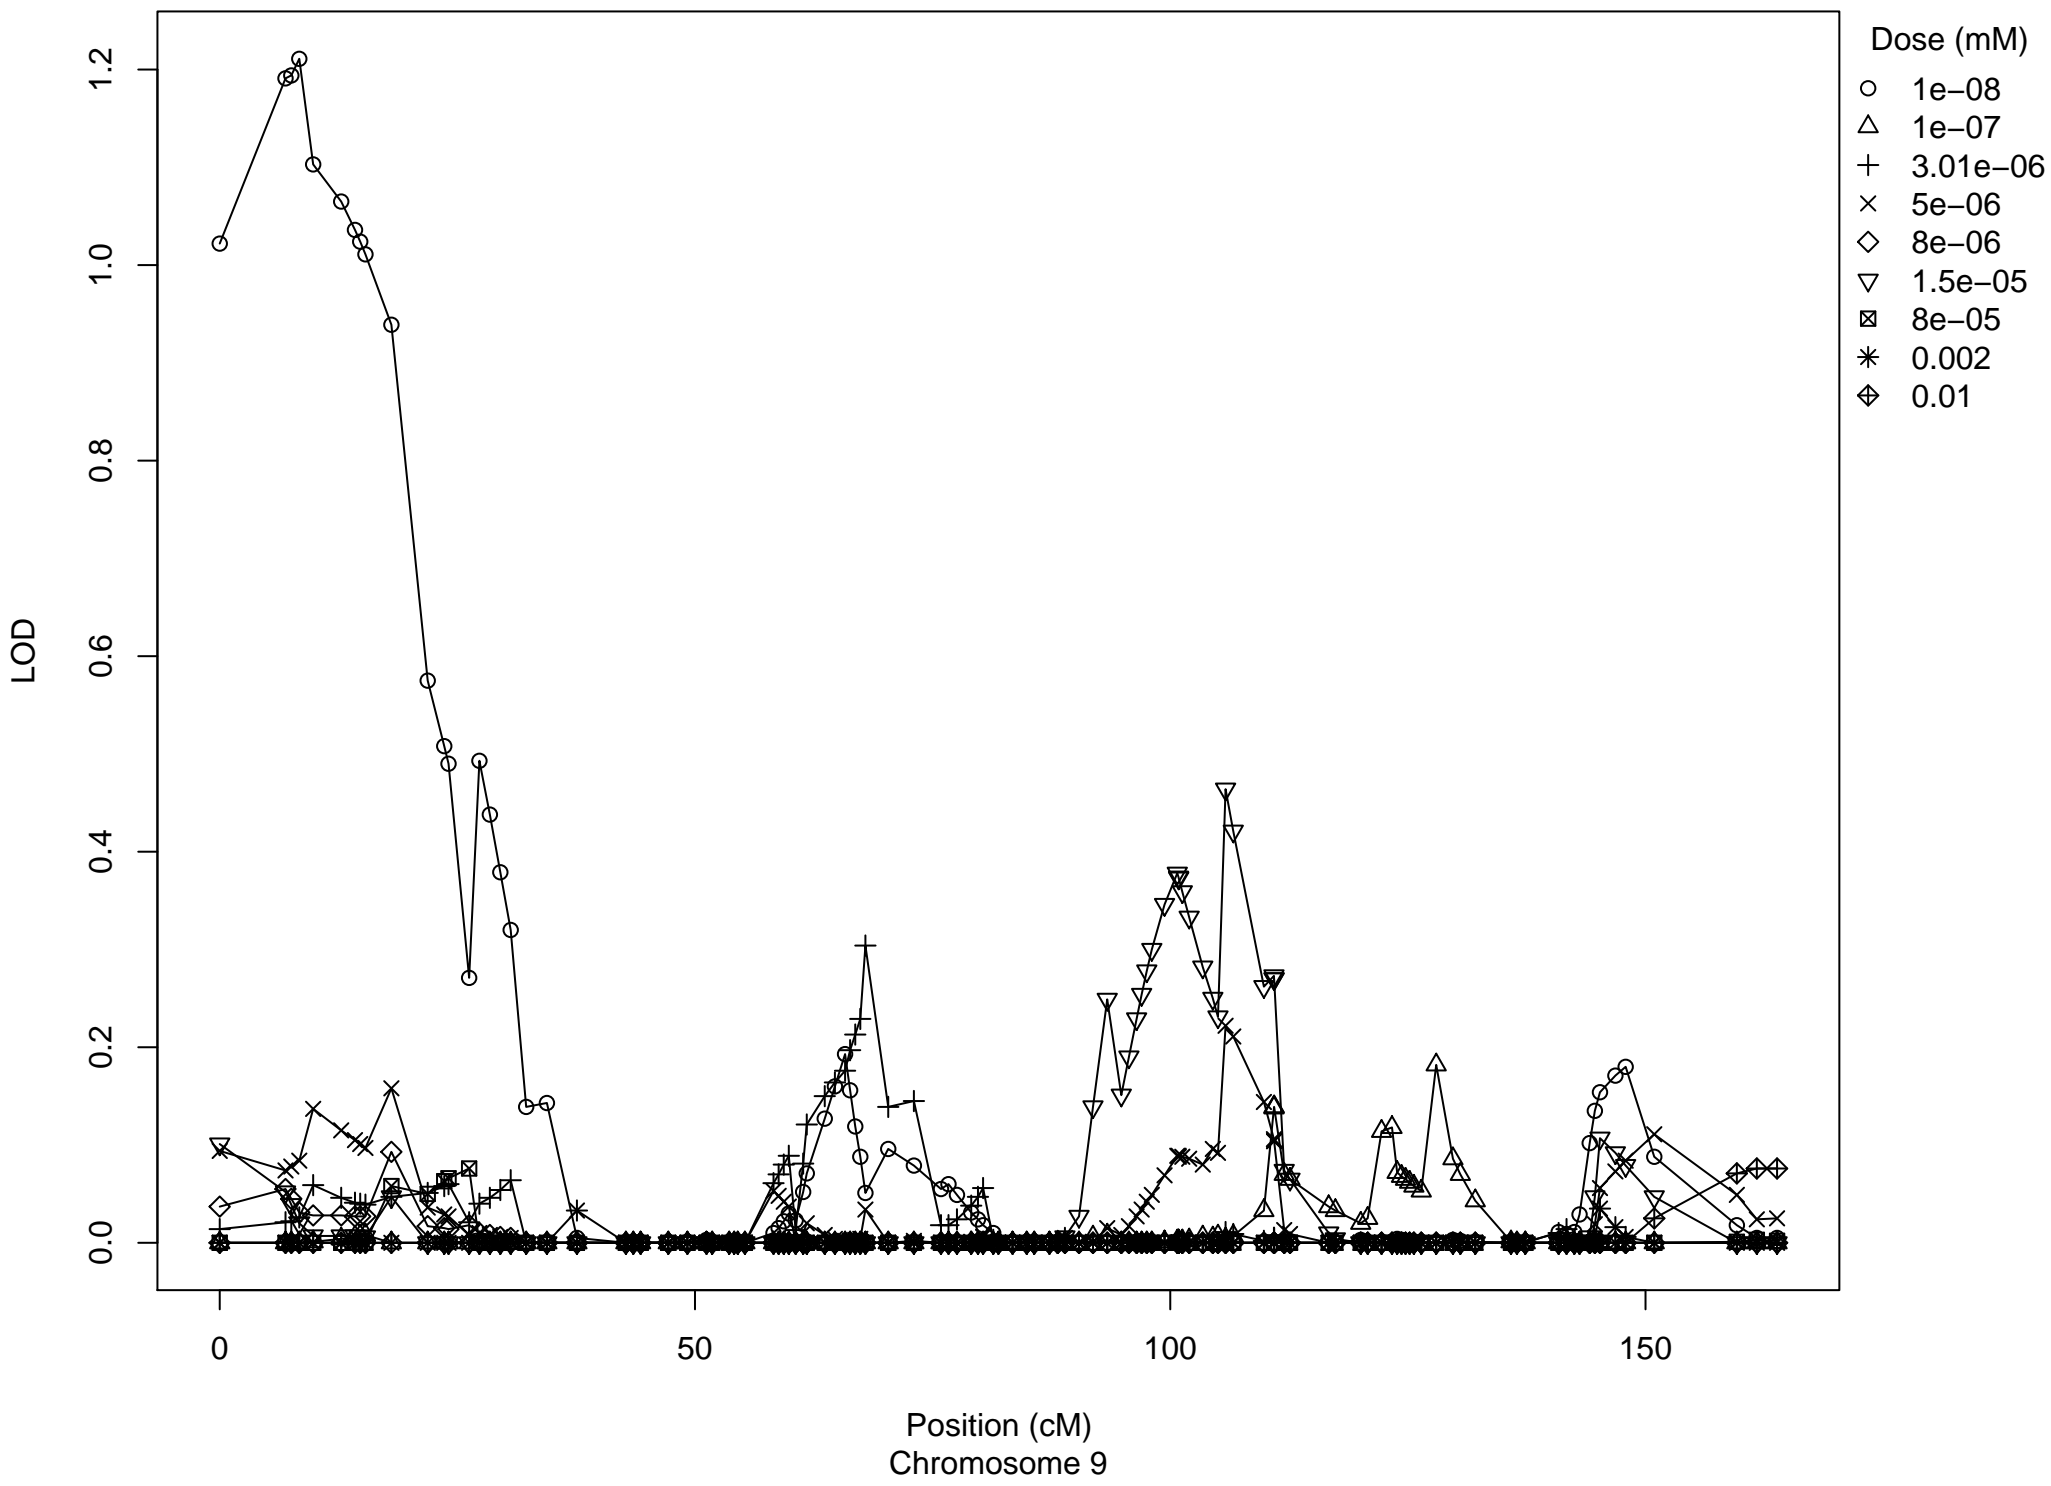



# 9-nitrocamptothecin (9NC)

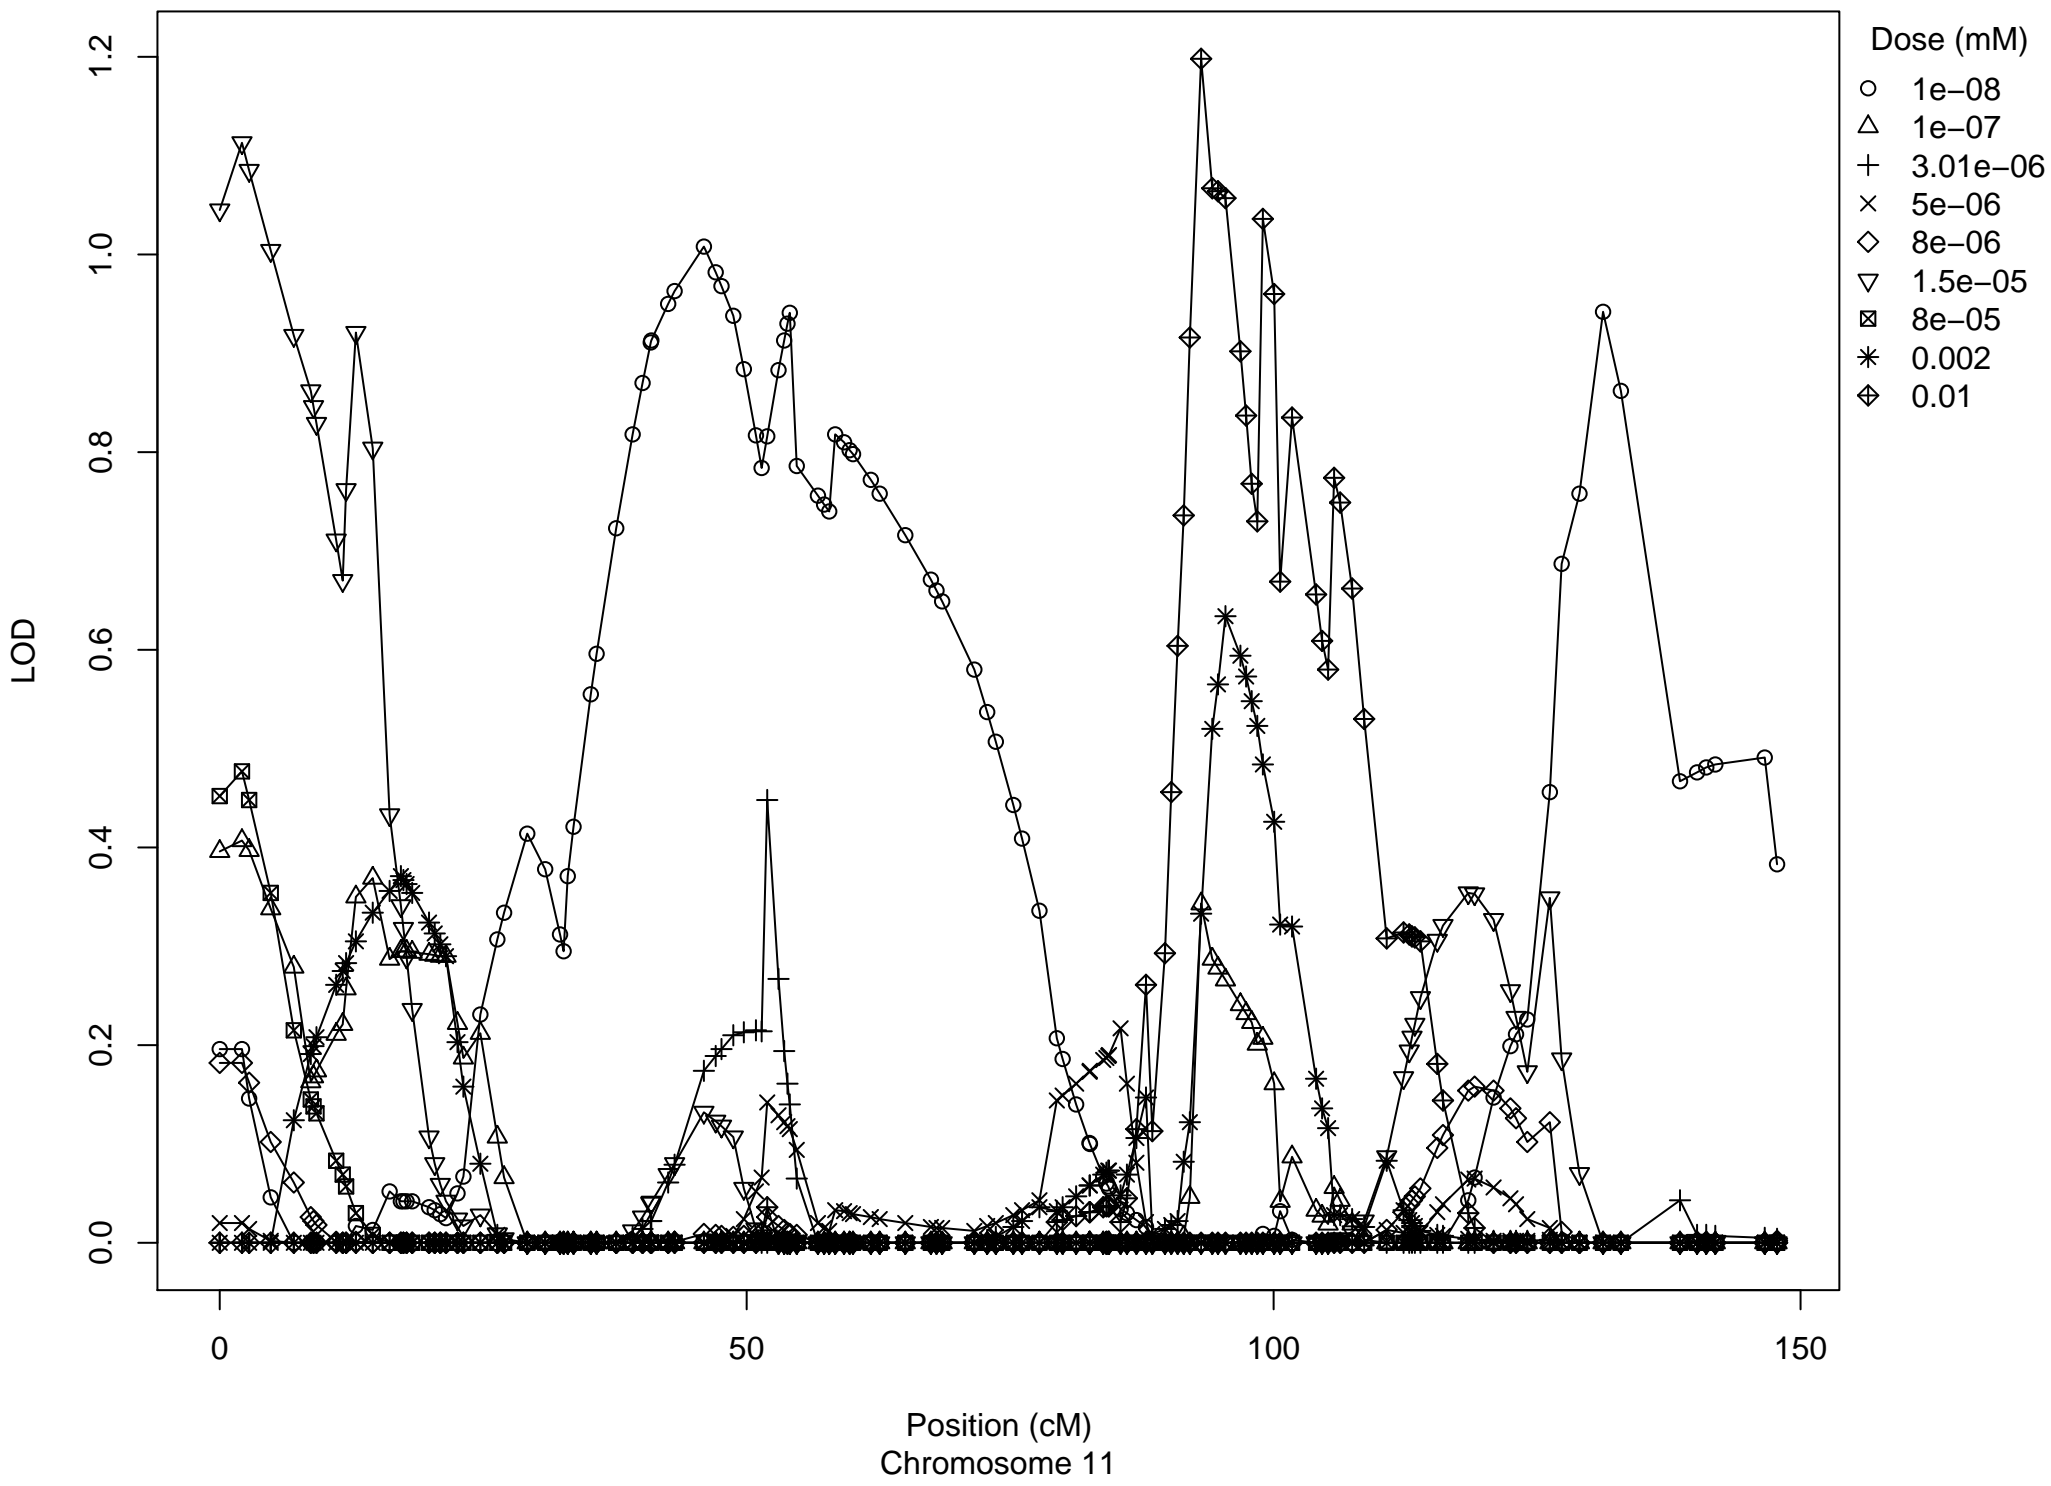

# 9-nitrocamptothecin (9NC)

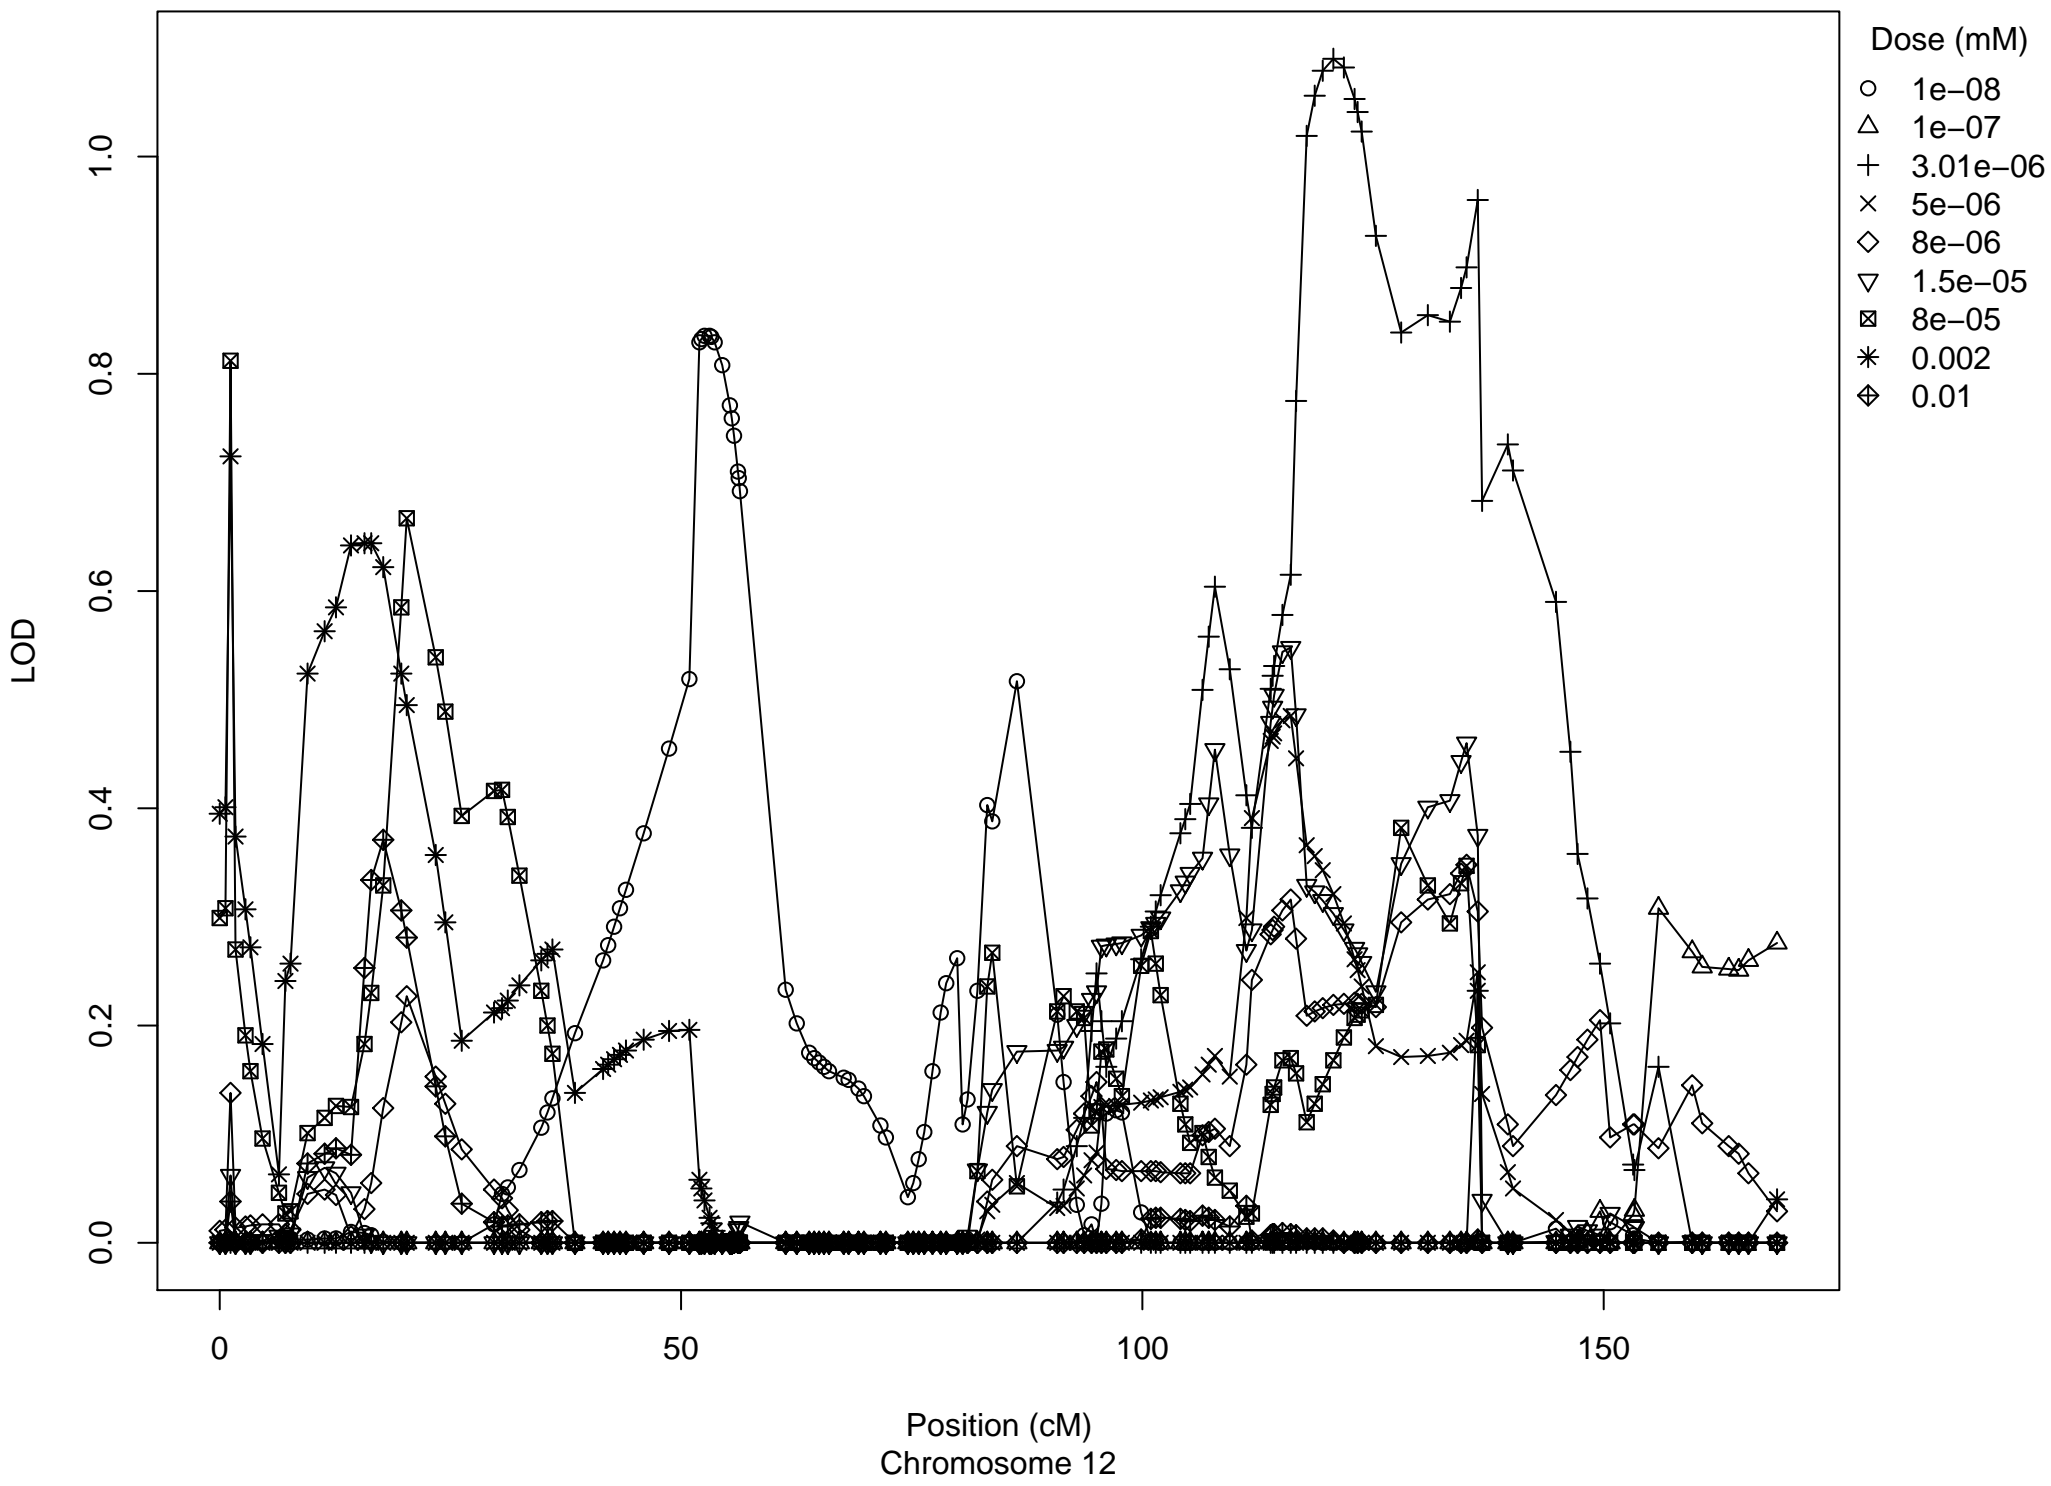





# 9-nitrocamptothecin (9NC)

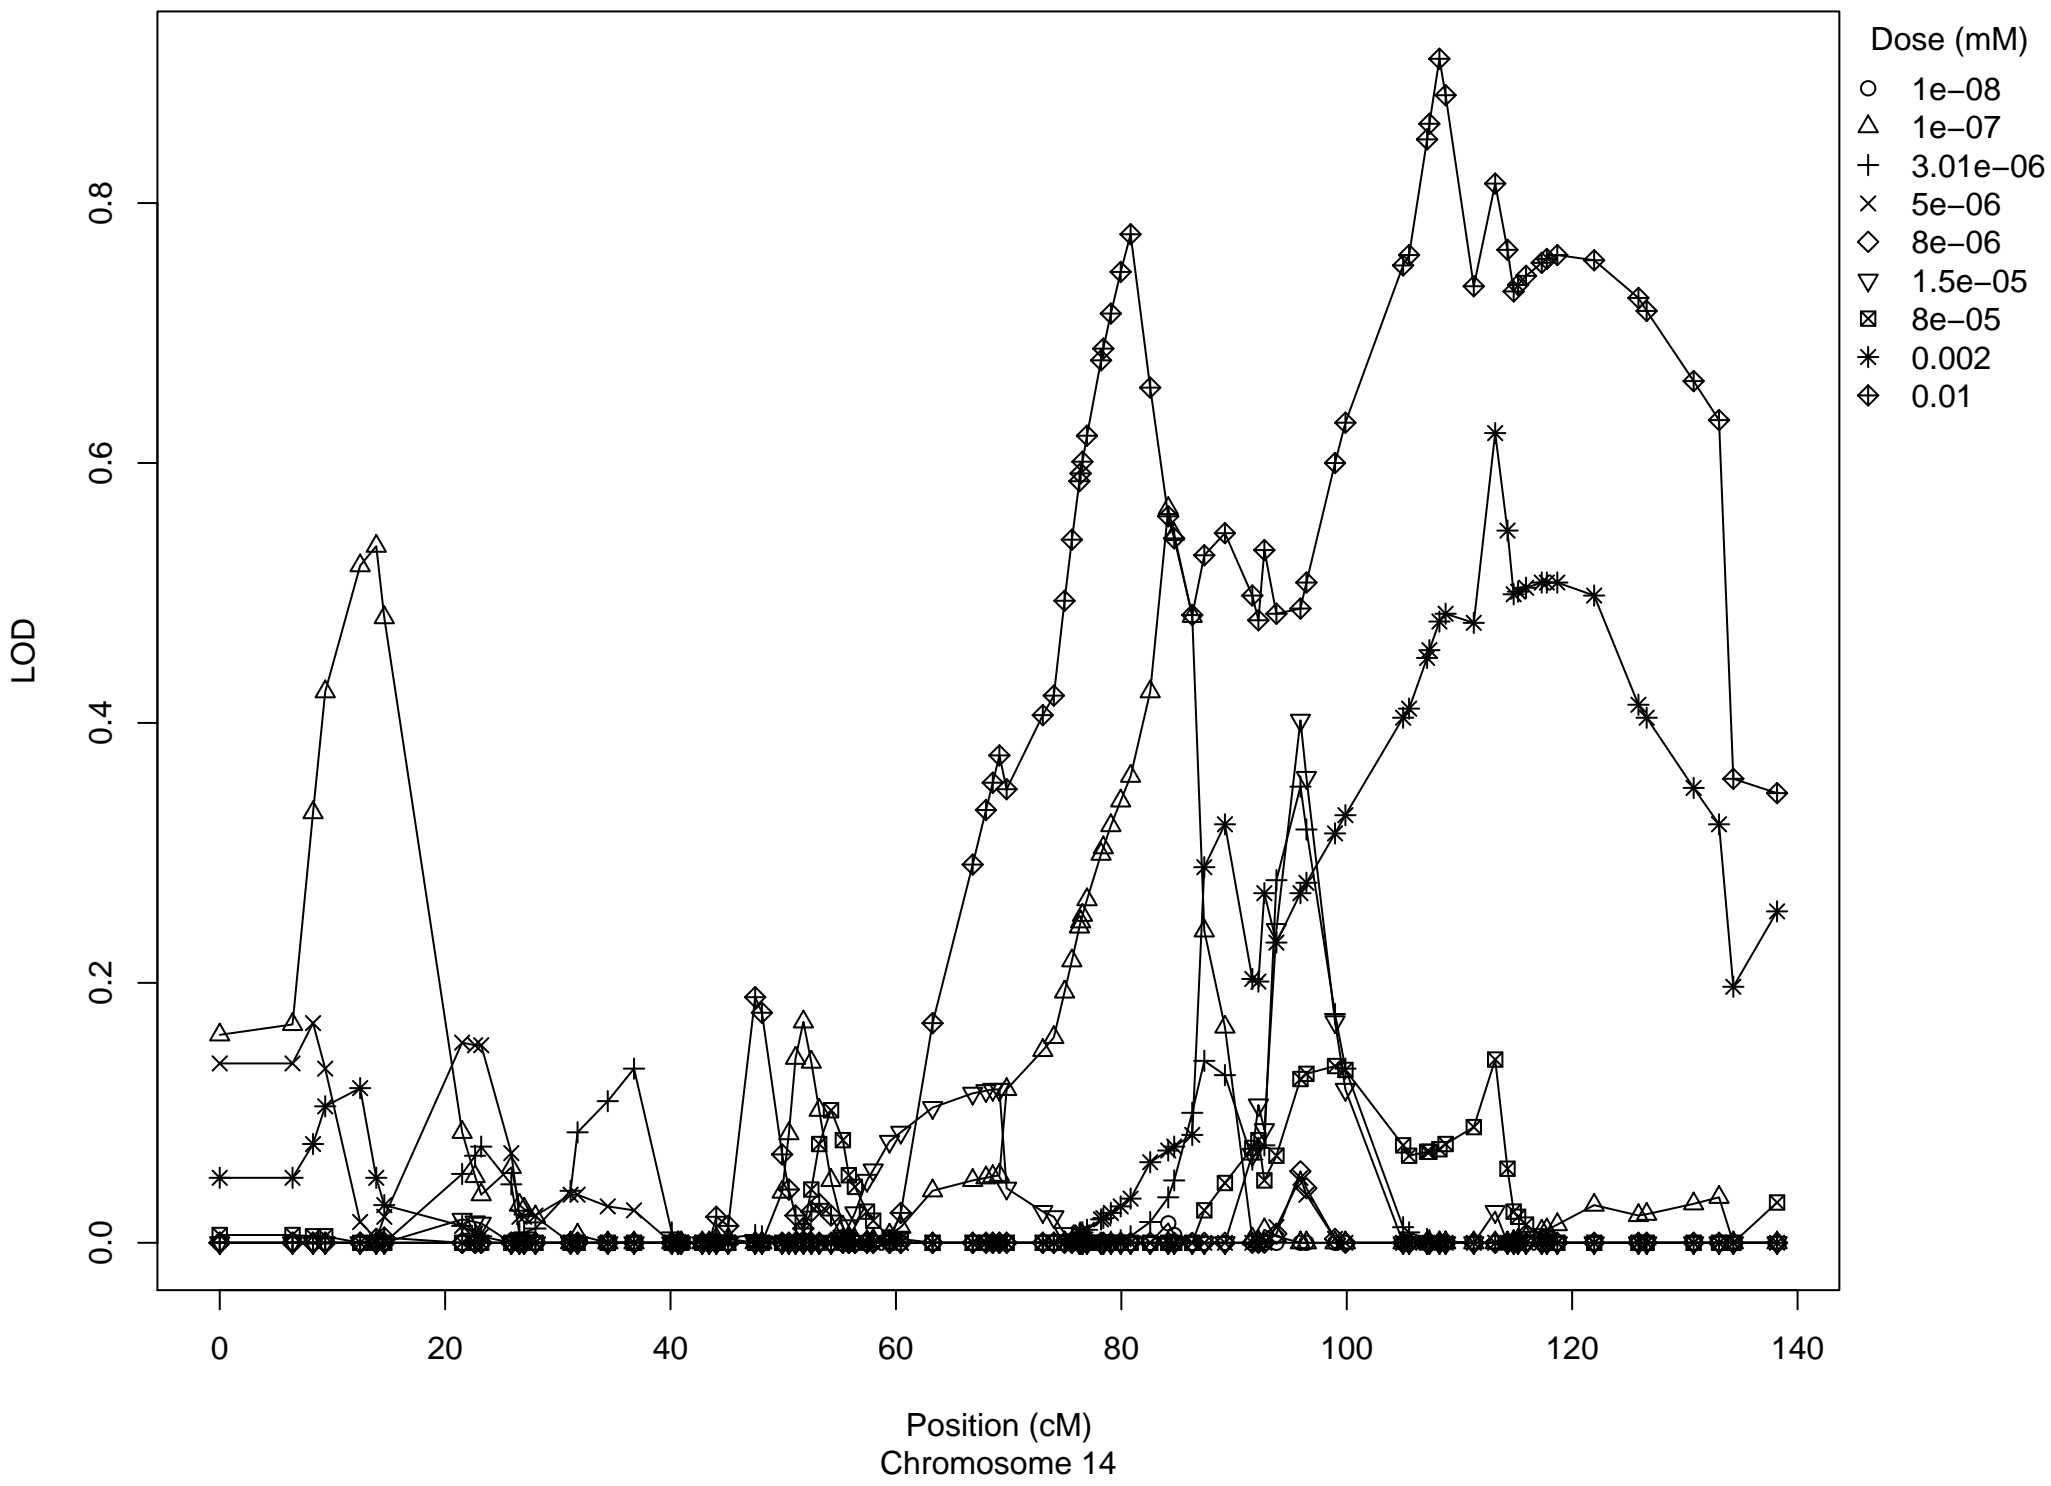

# 9-nitrocamptothecin (9NC)

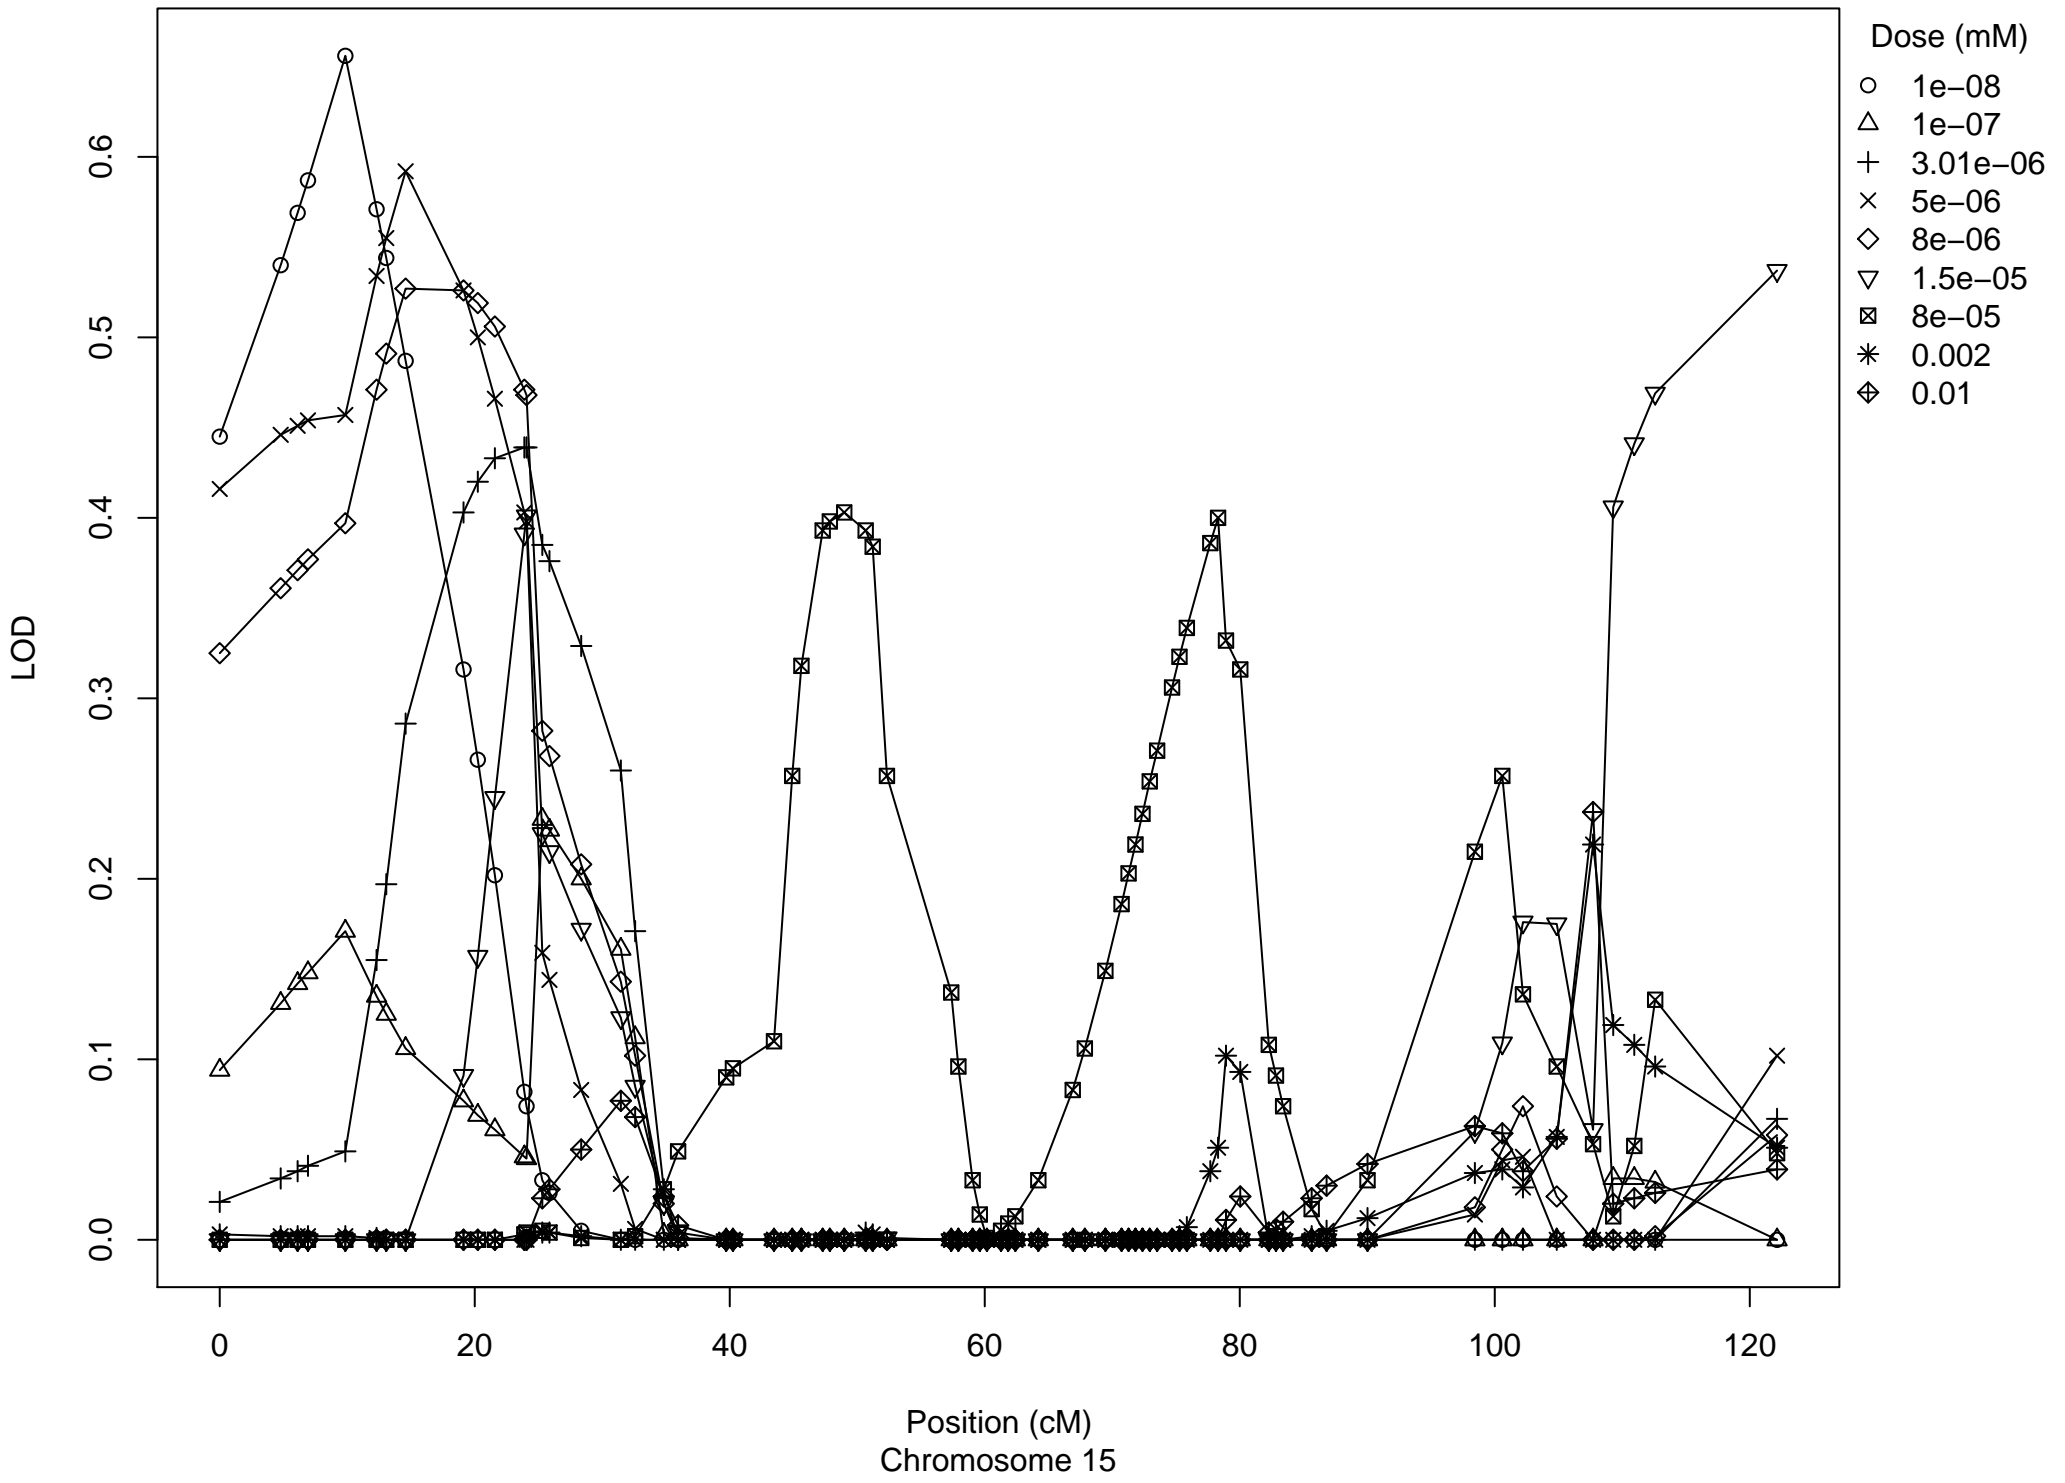

# 9-nitrocamptothecin (9NC)

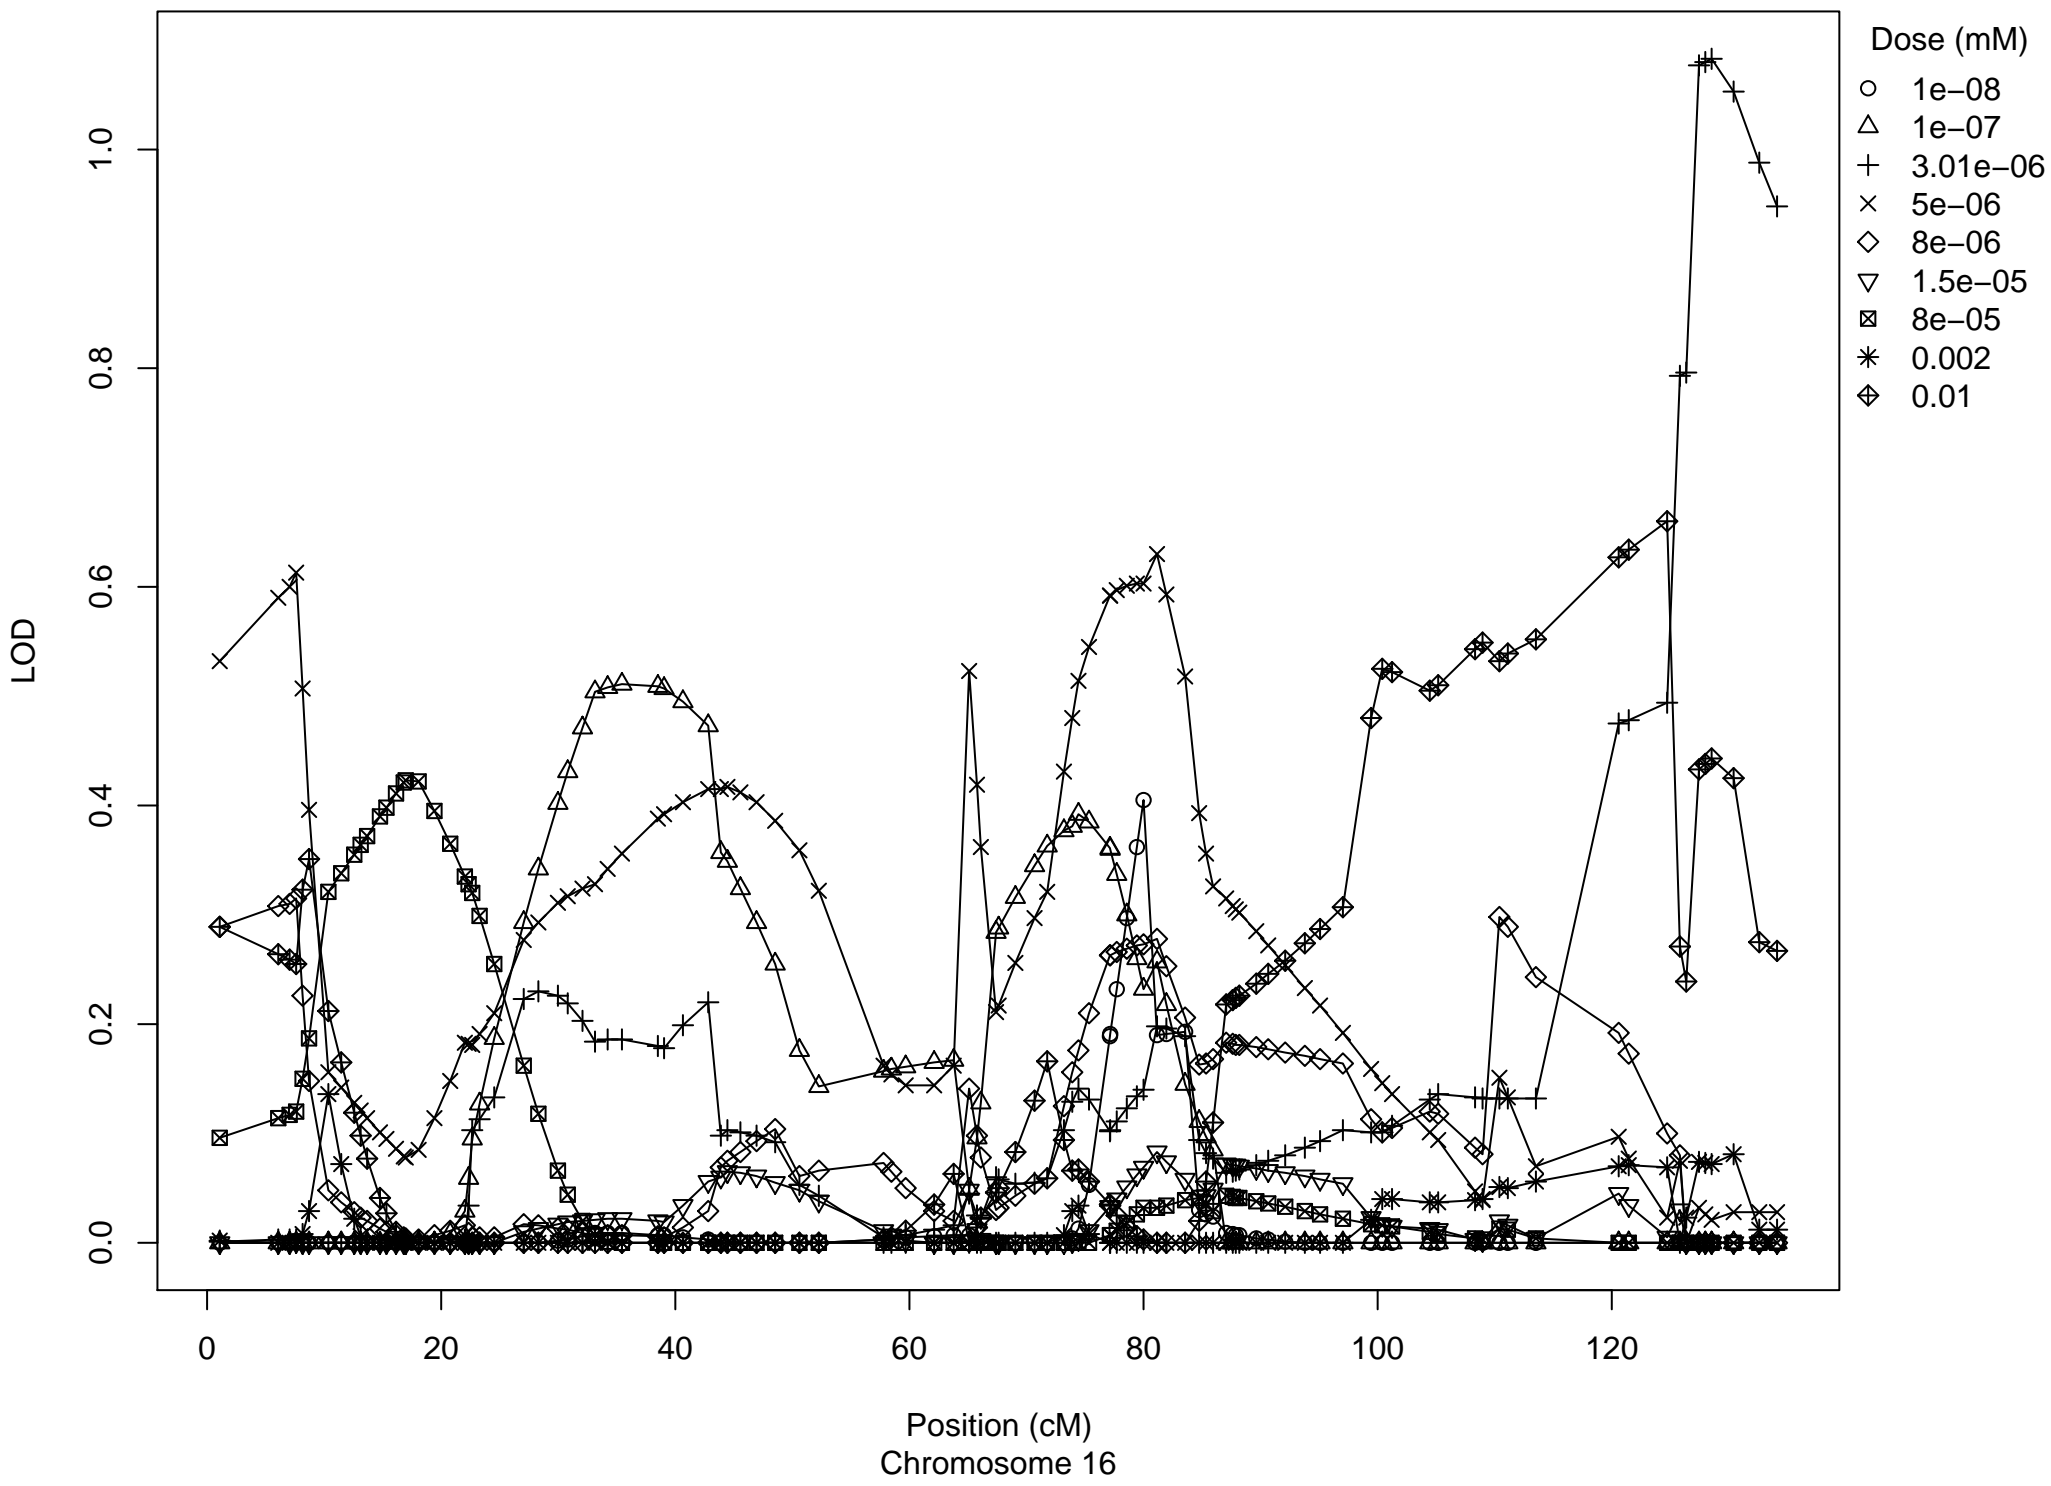



# 9-nitrocamptothecin (9NC)

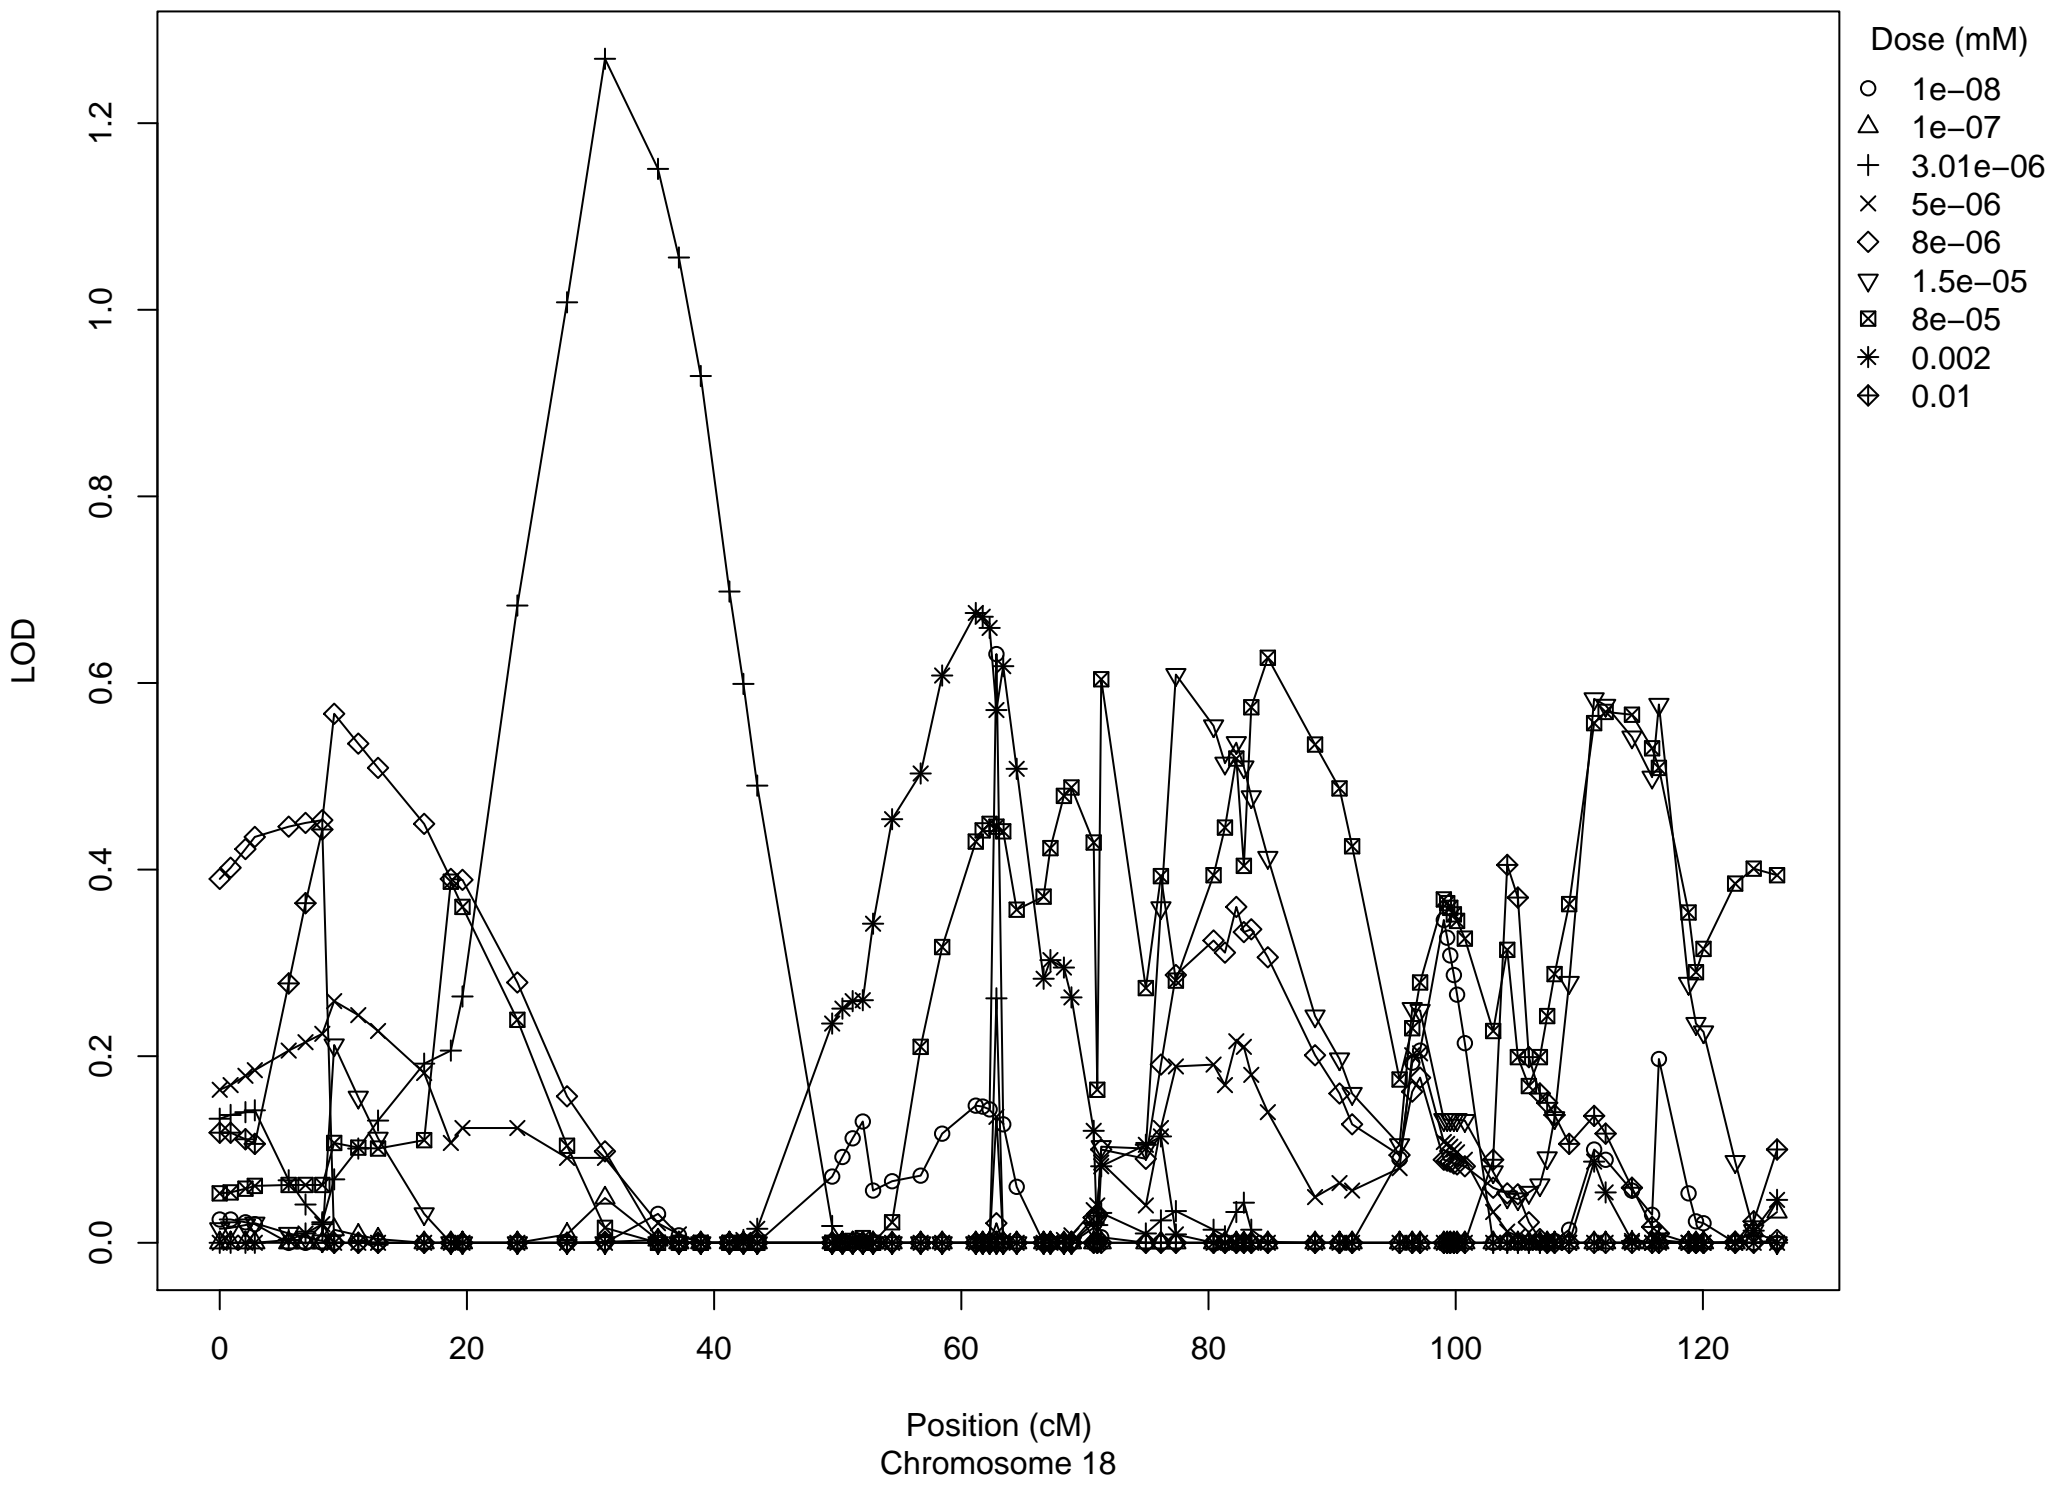

# 9-nitrocamptothecin (9NC)

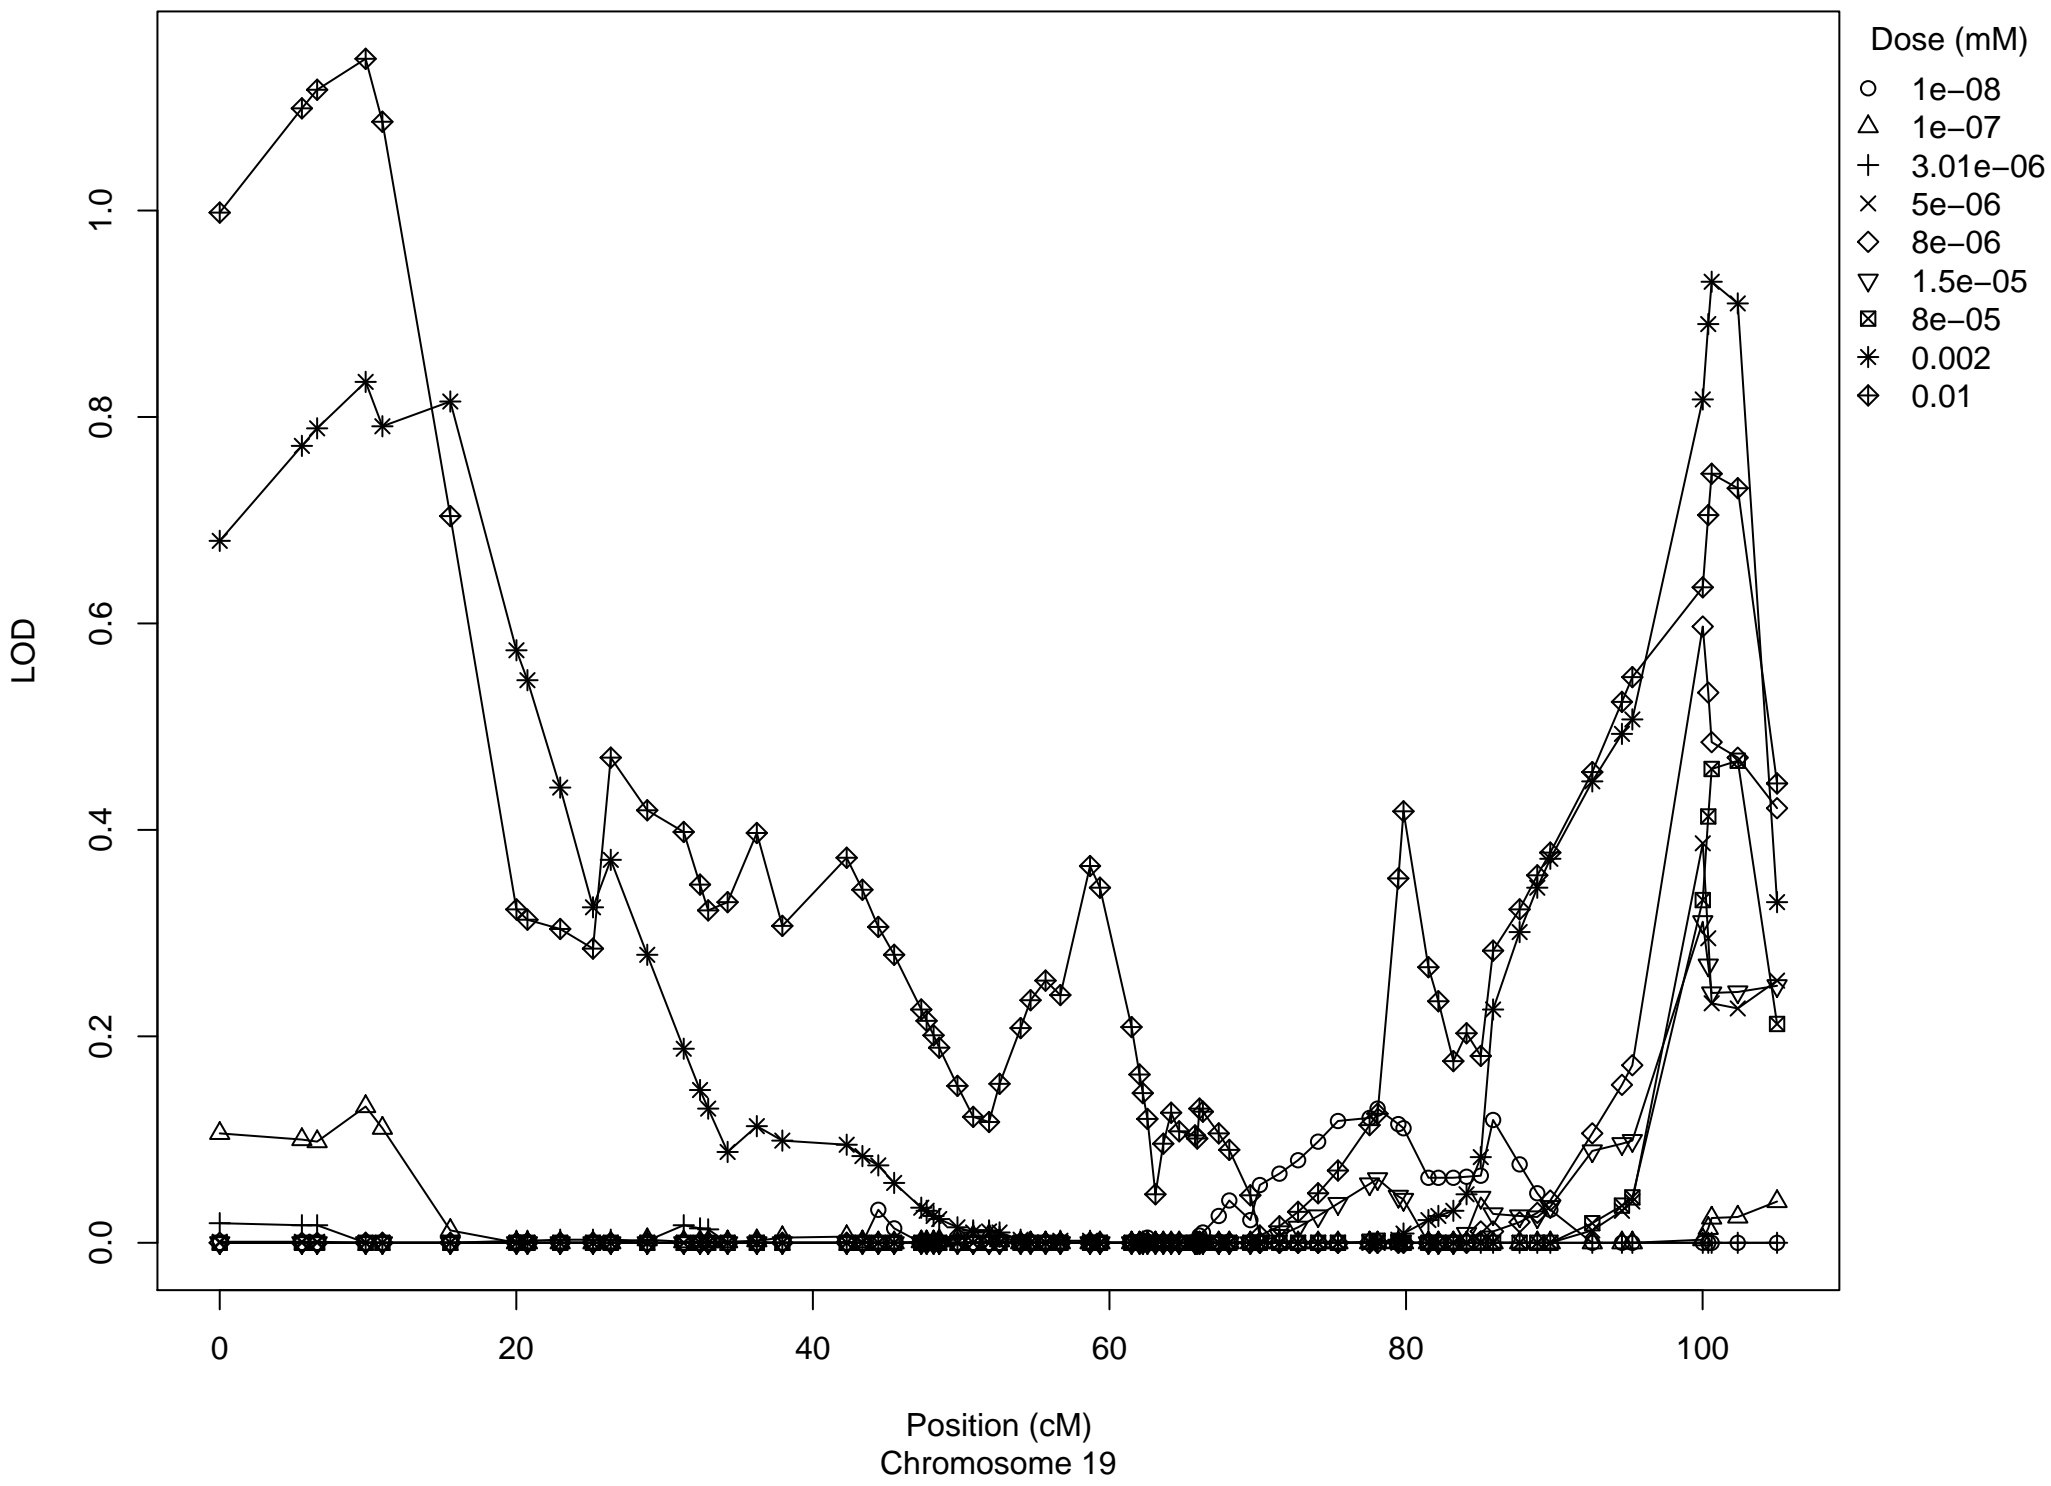

# 9-nitrocamptothecin (9NC)

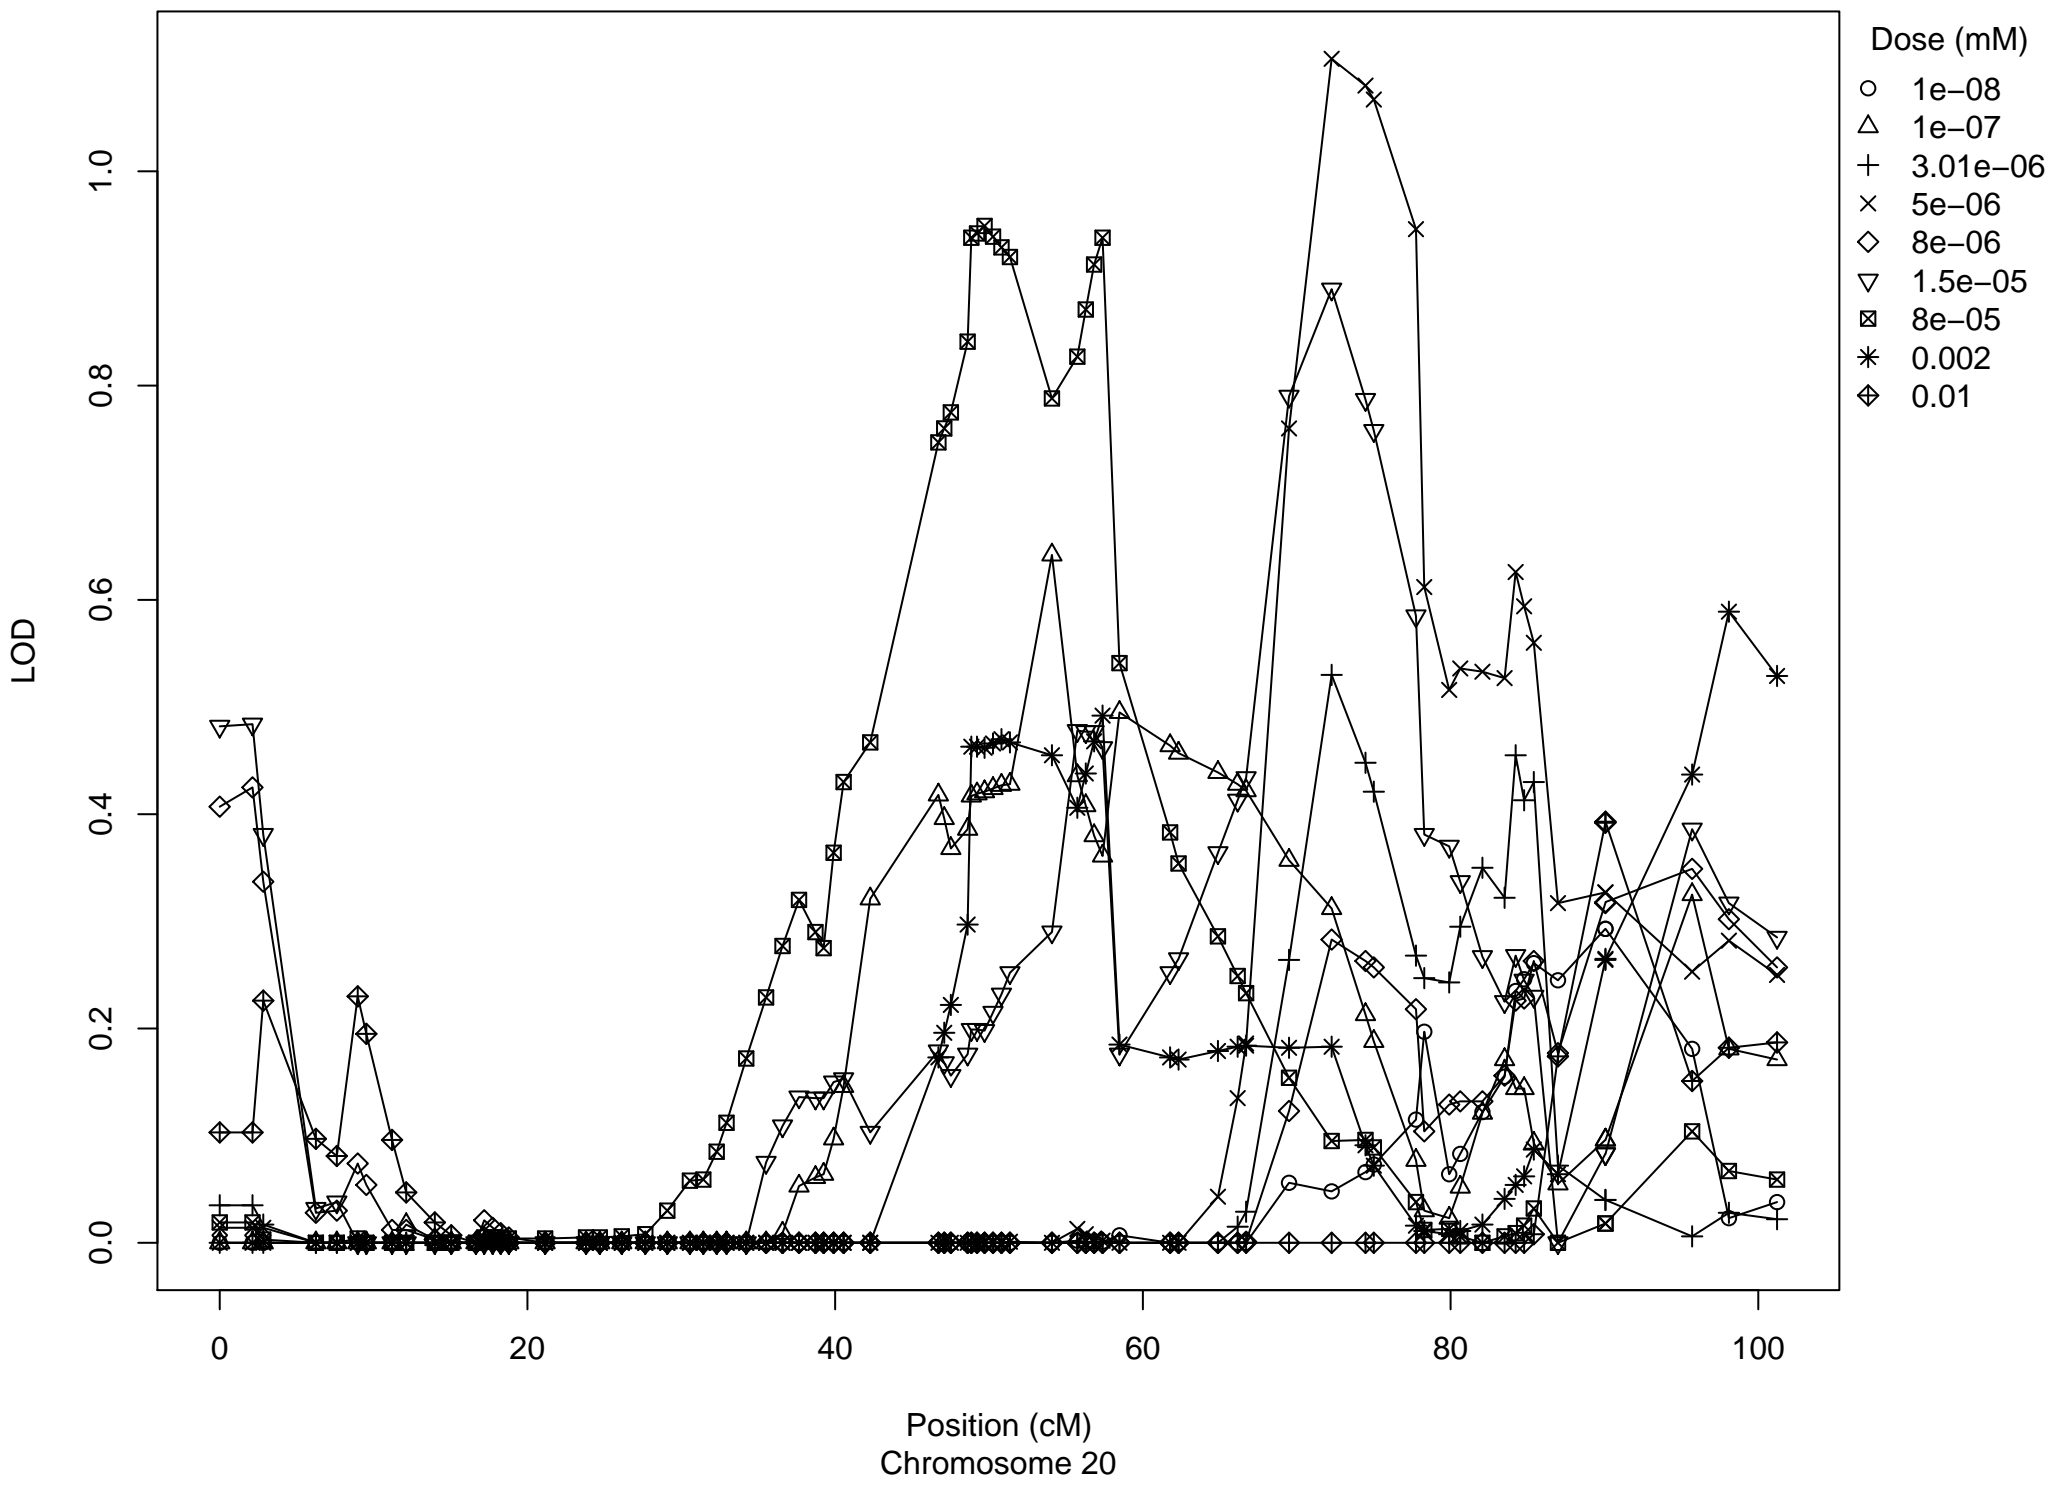



# 9-nitrocamptothecin (9NC)

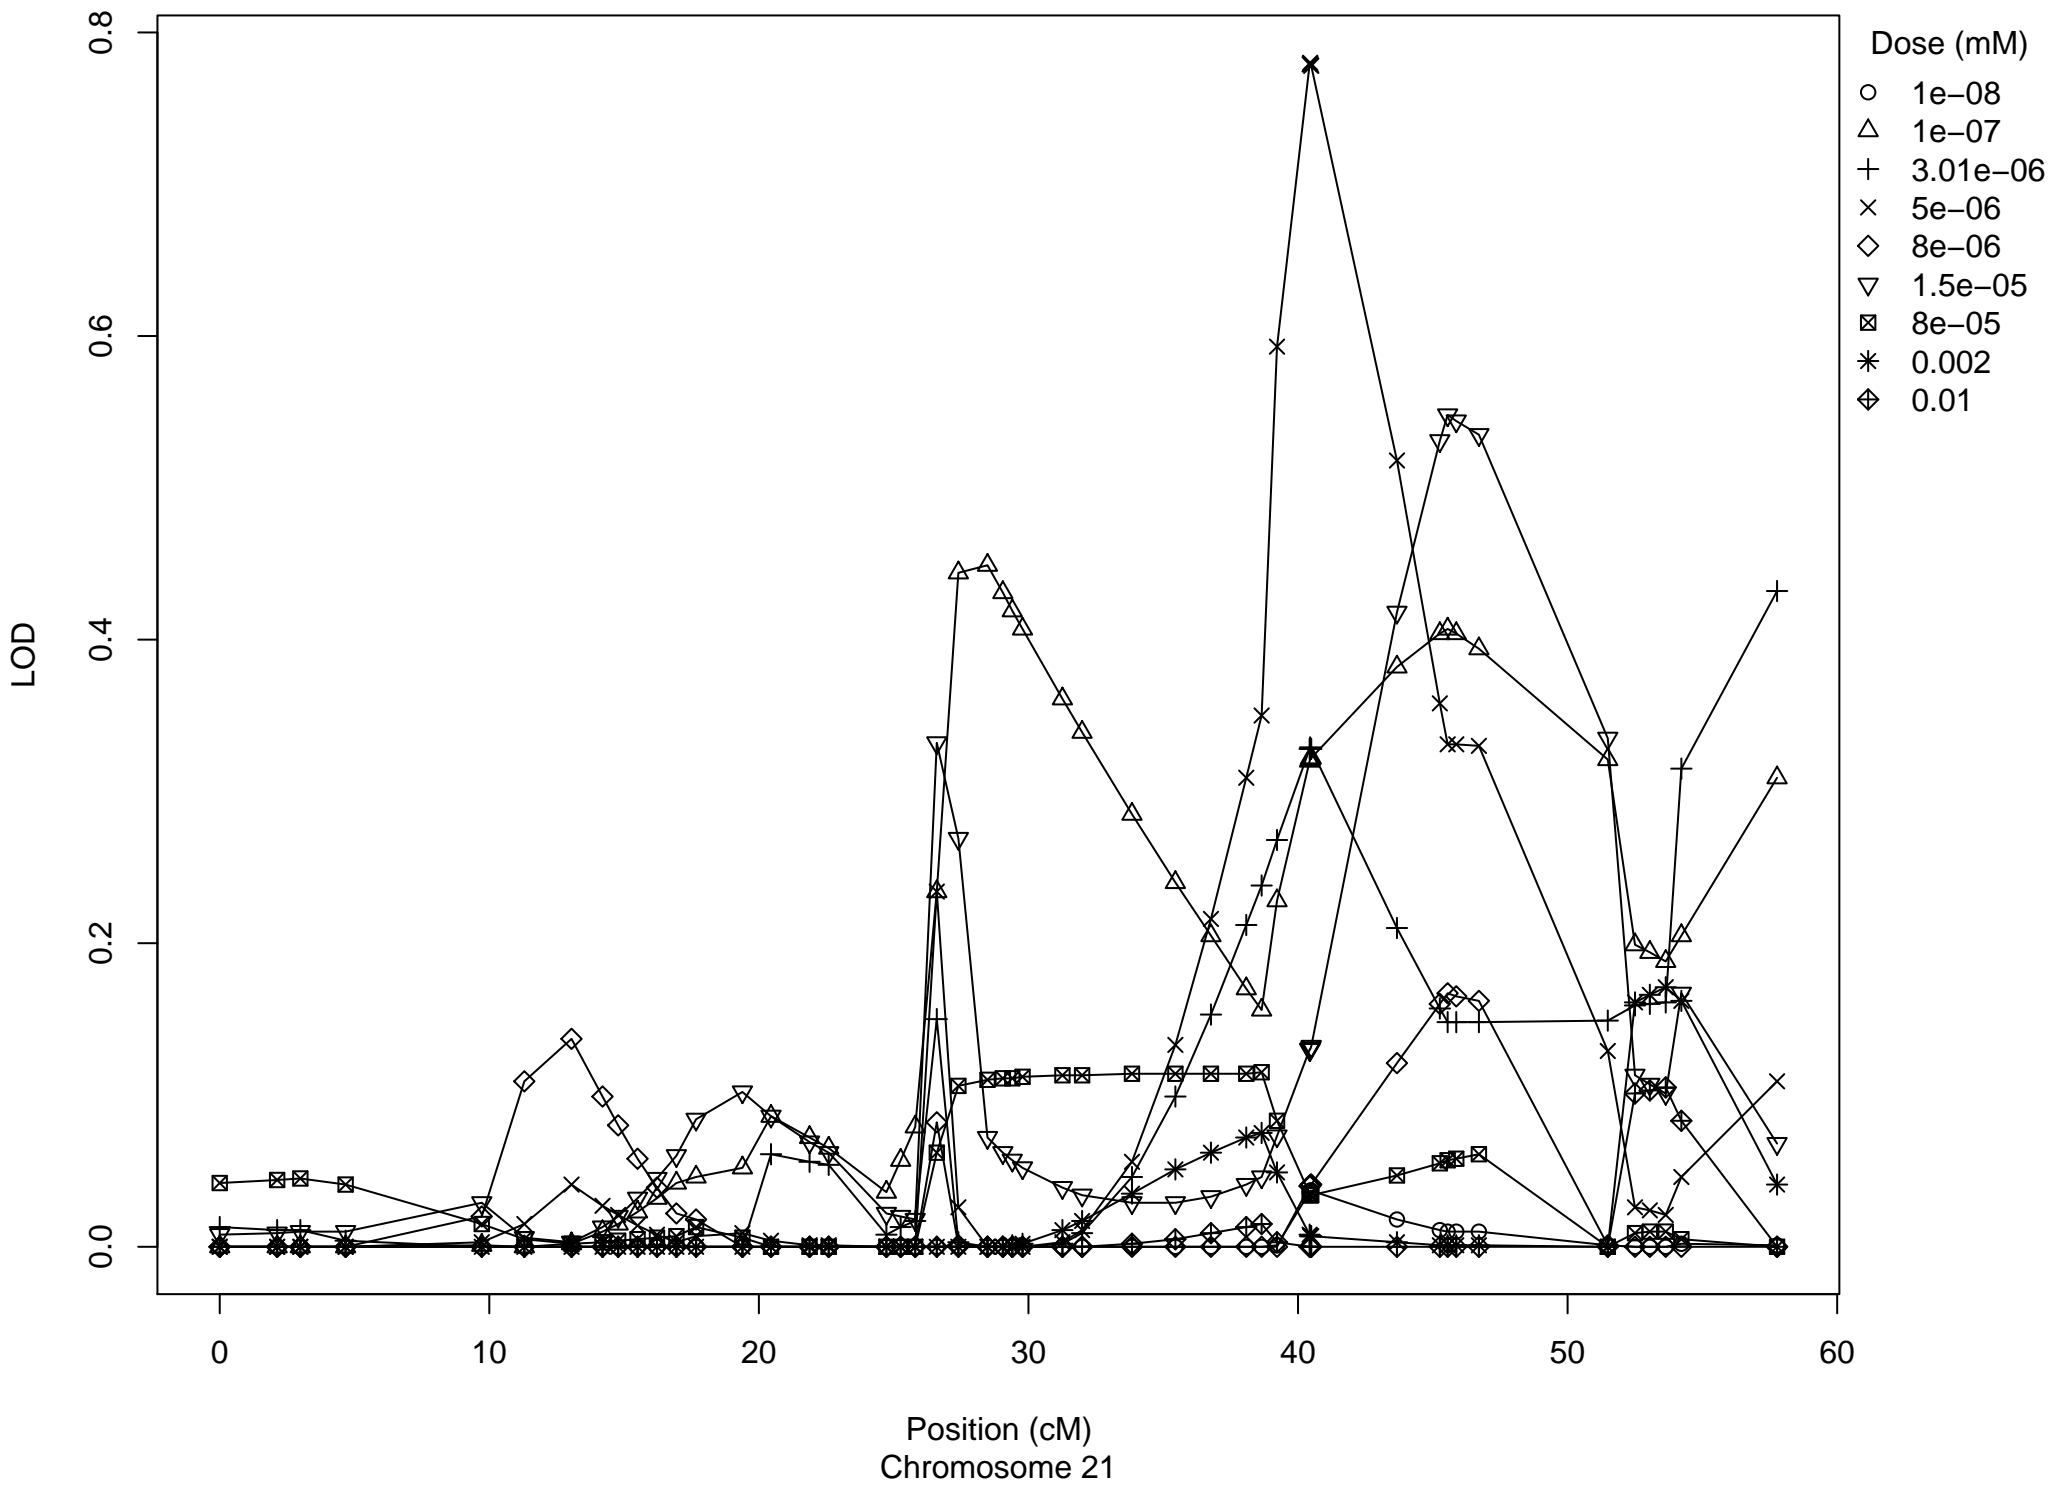

# 9-nitrocamptothecin (9NC)

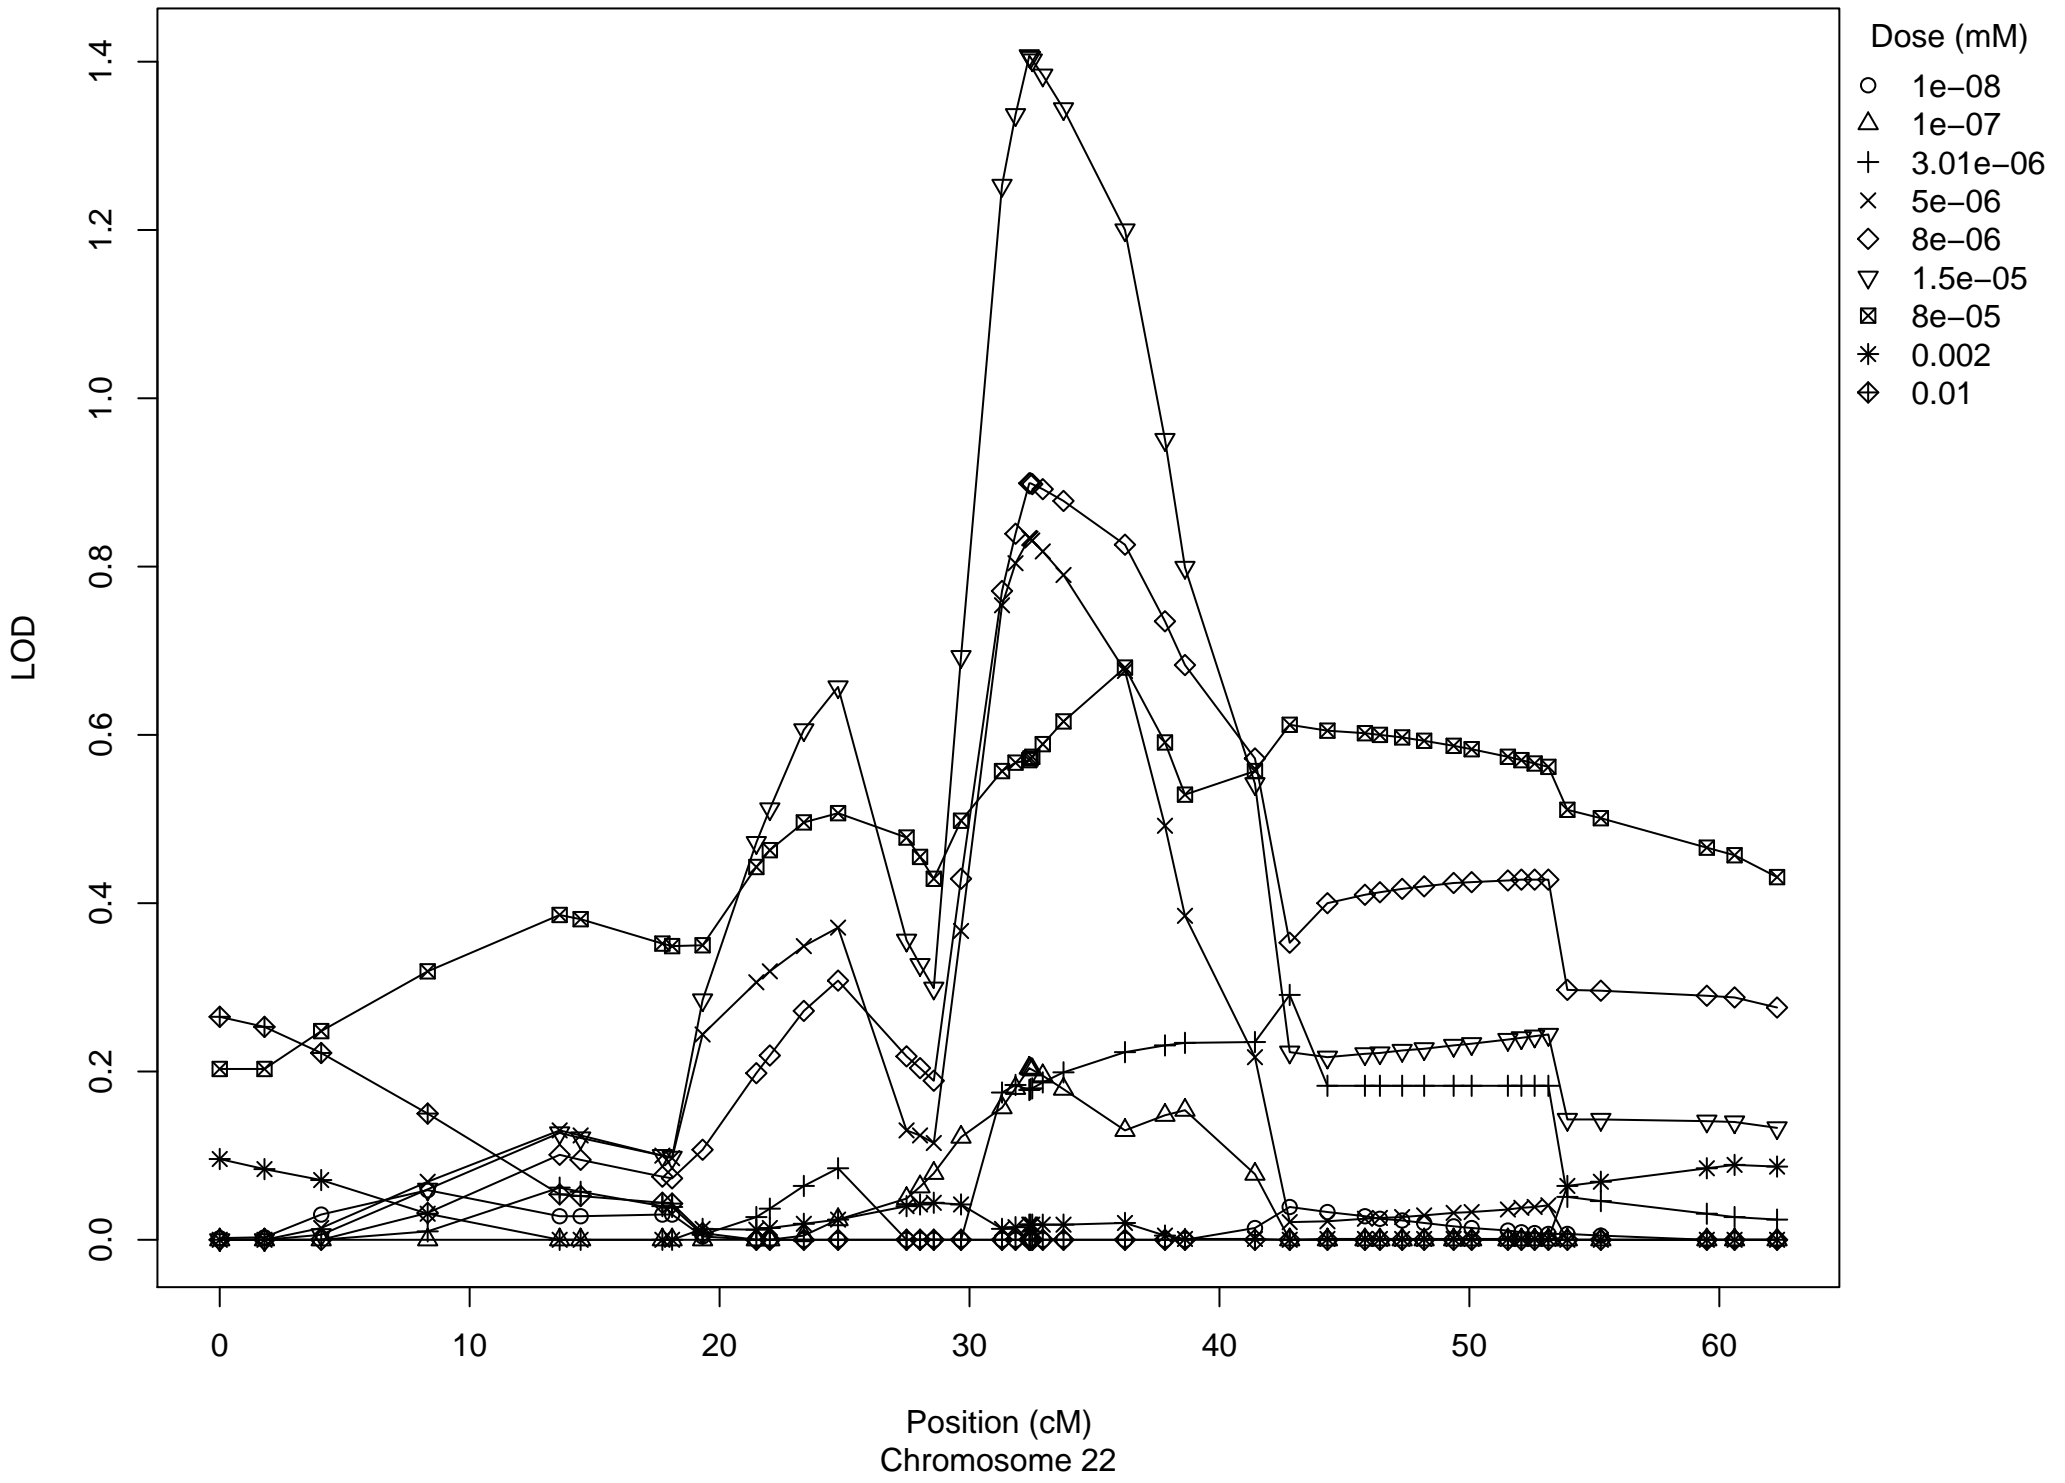

# Camptothecin (CPT)

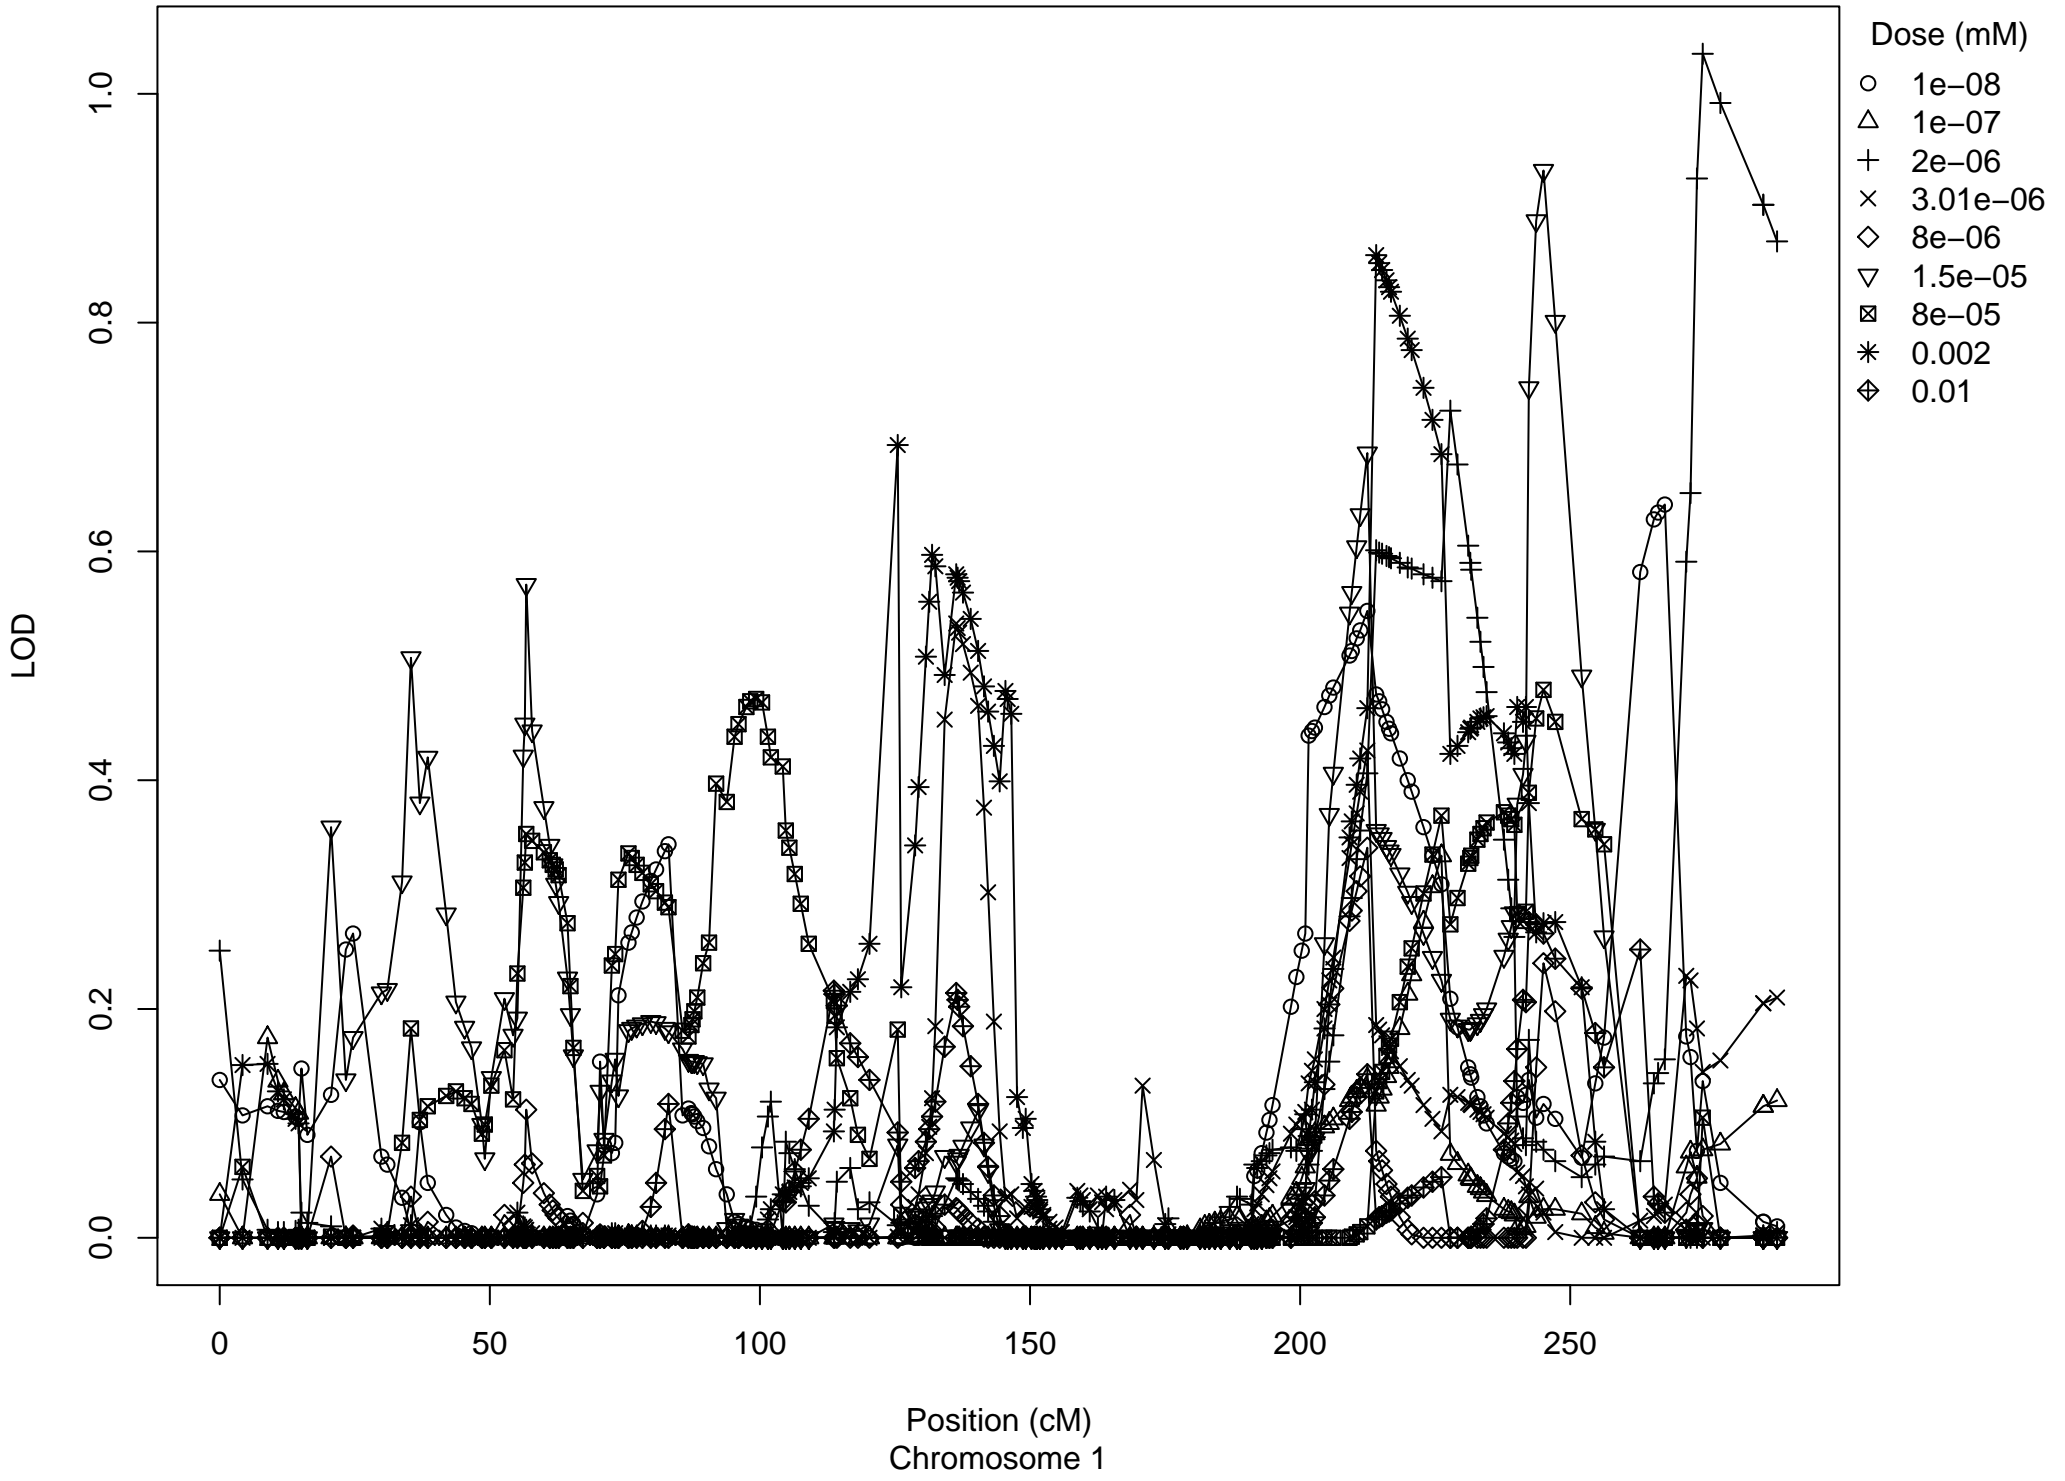

# Camptothecin (CPT)

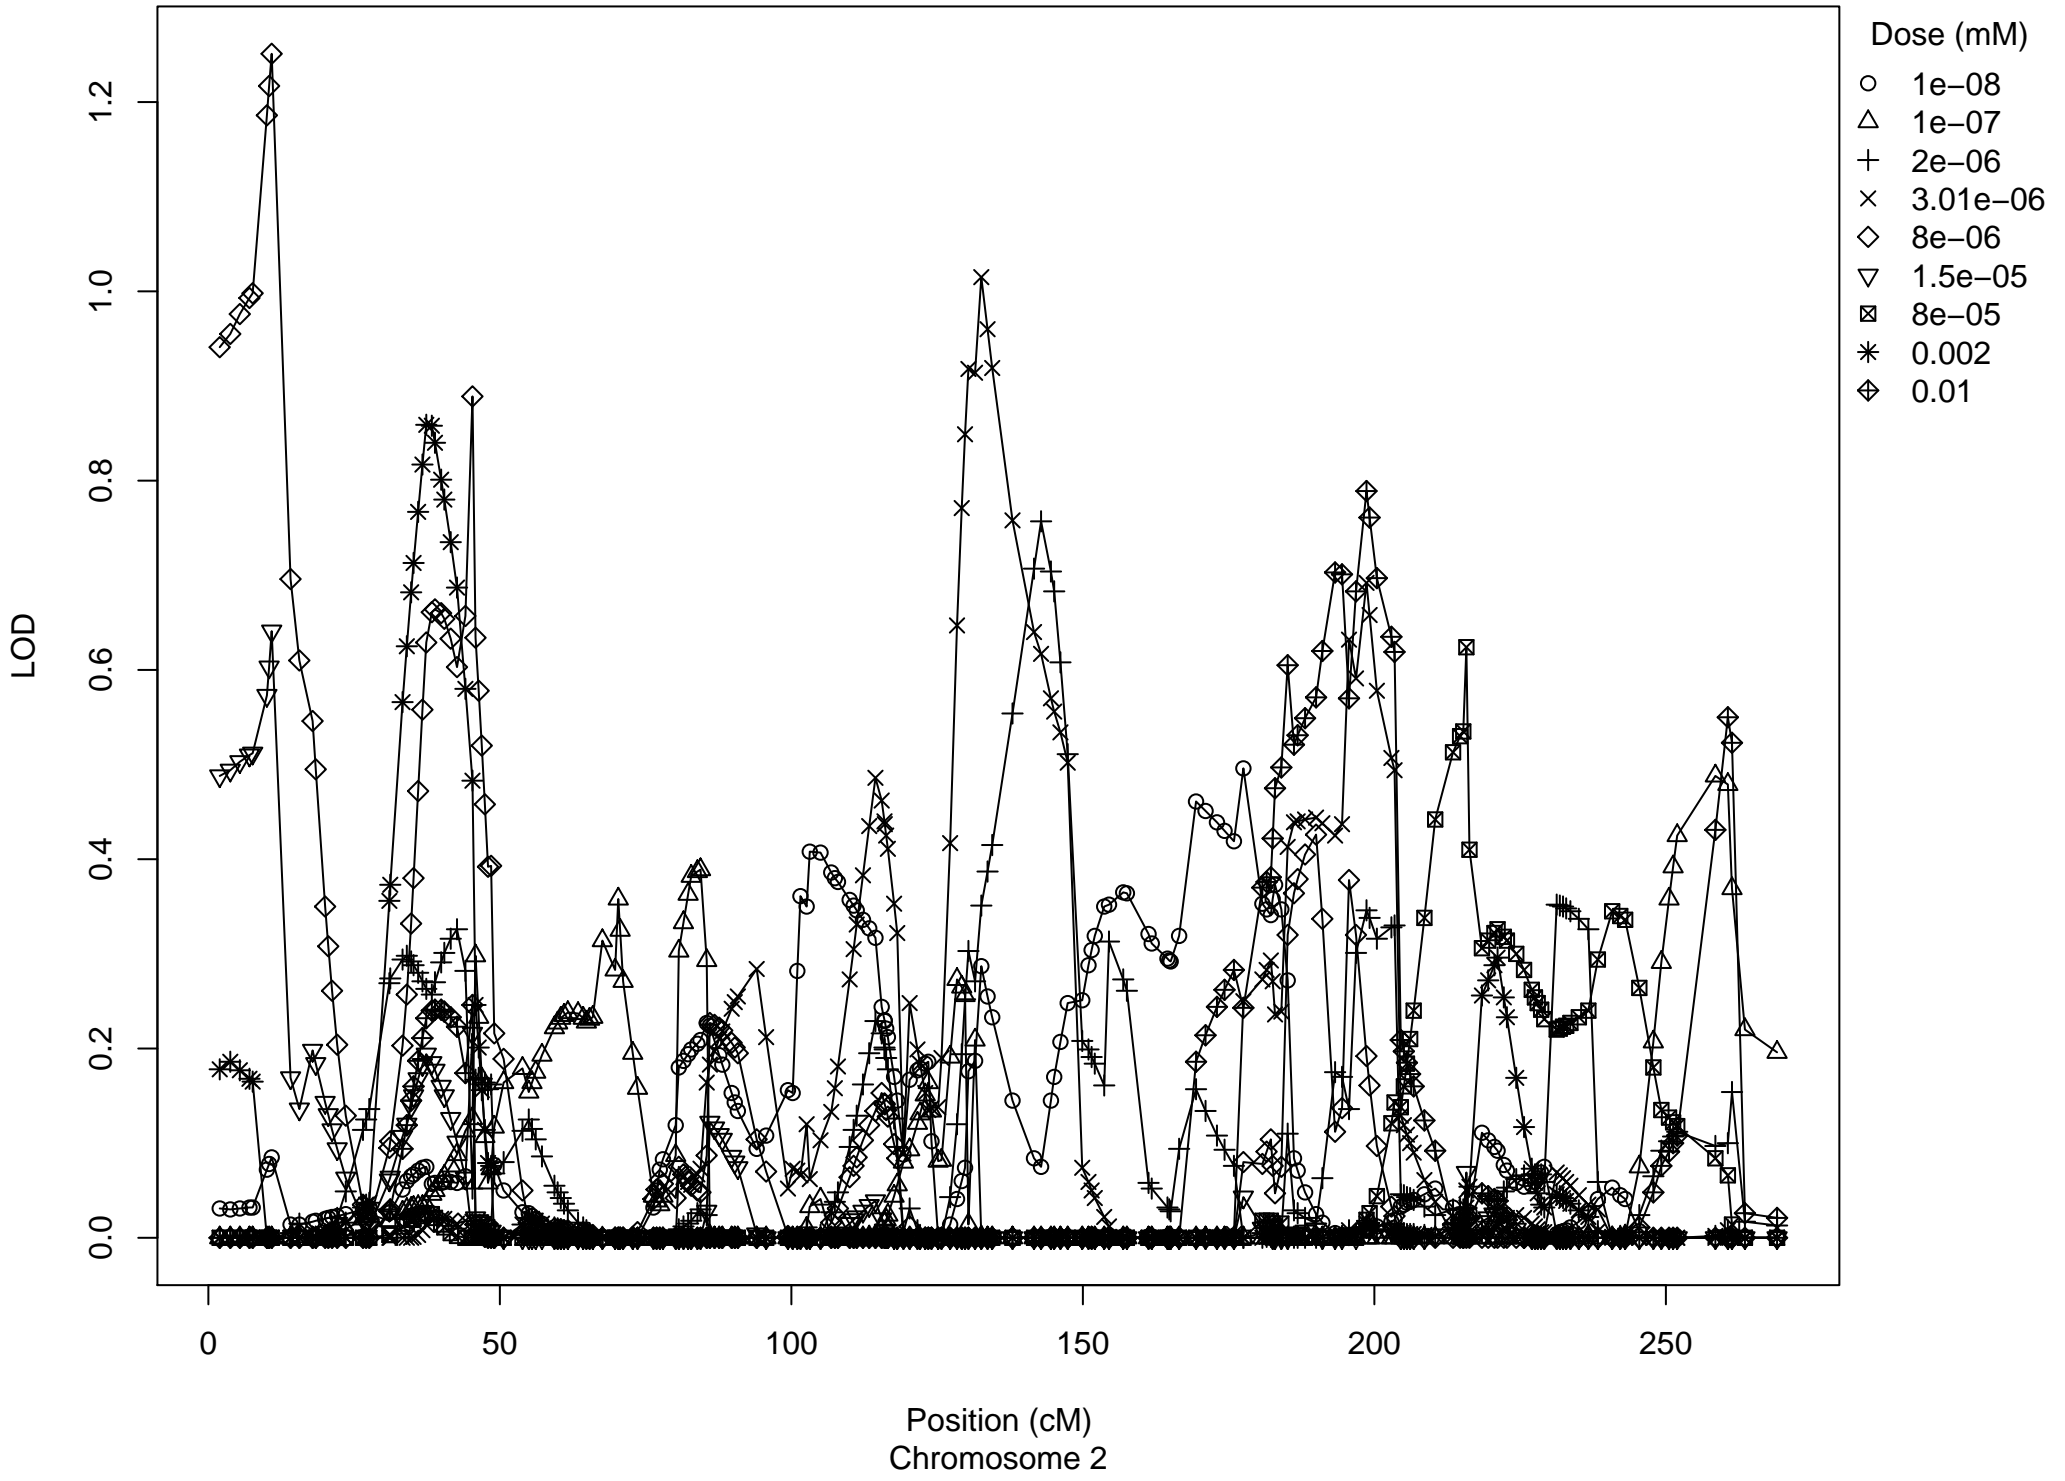

# Camptothecin (CPT)

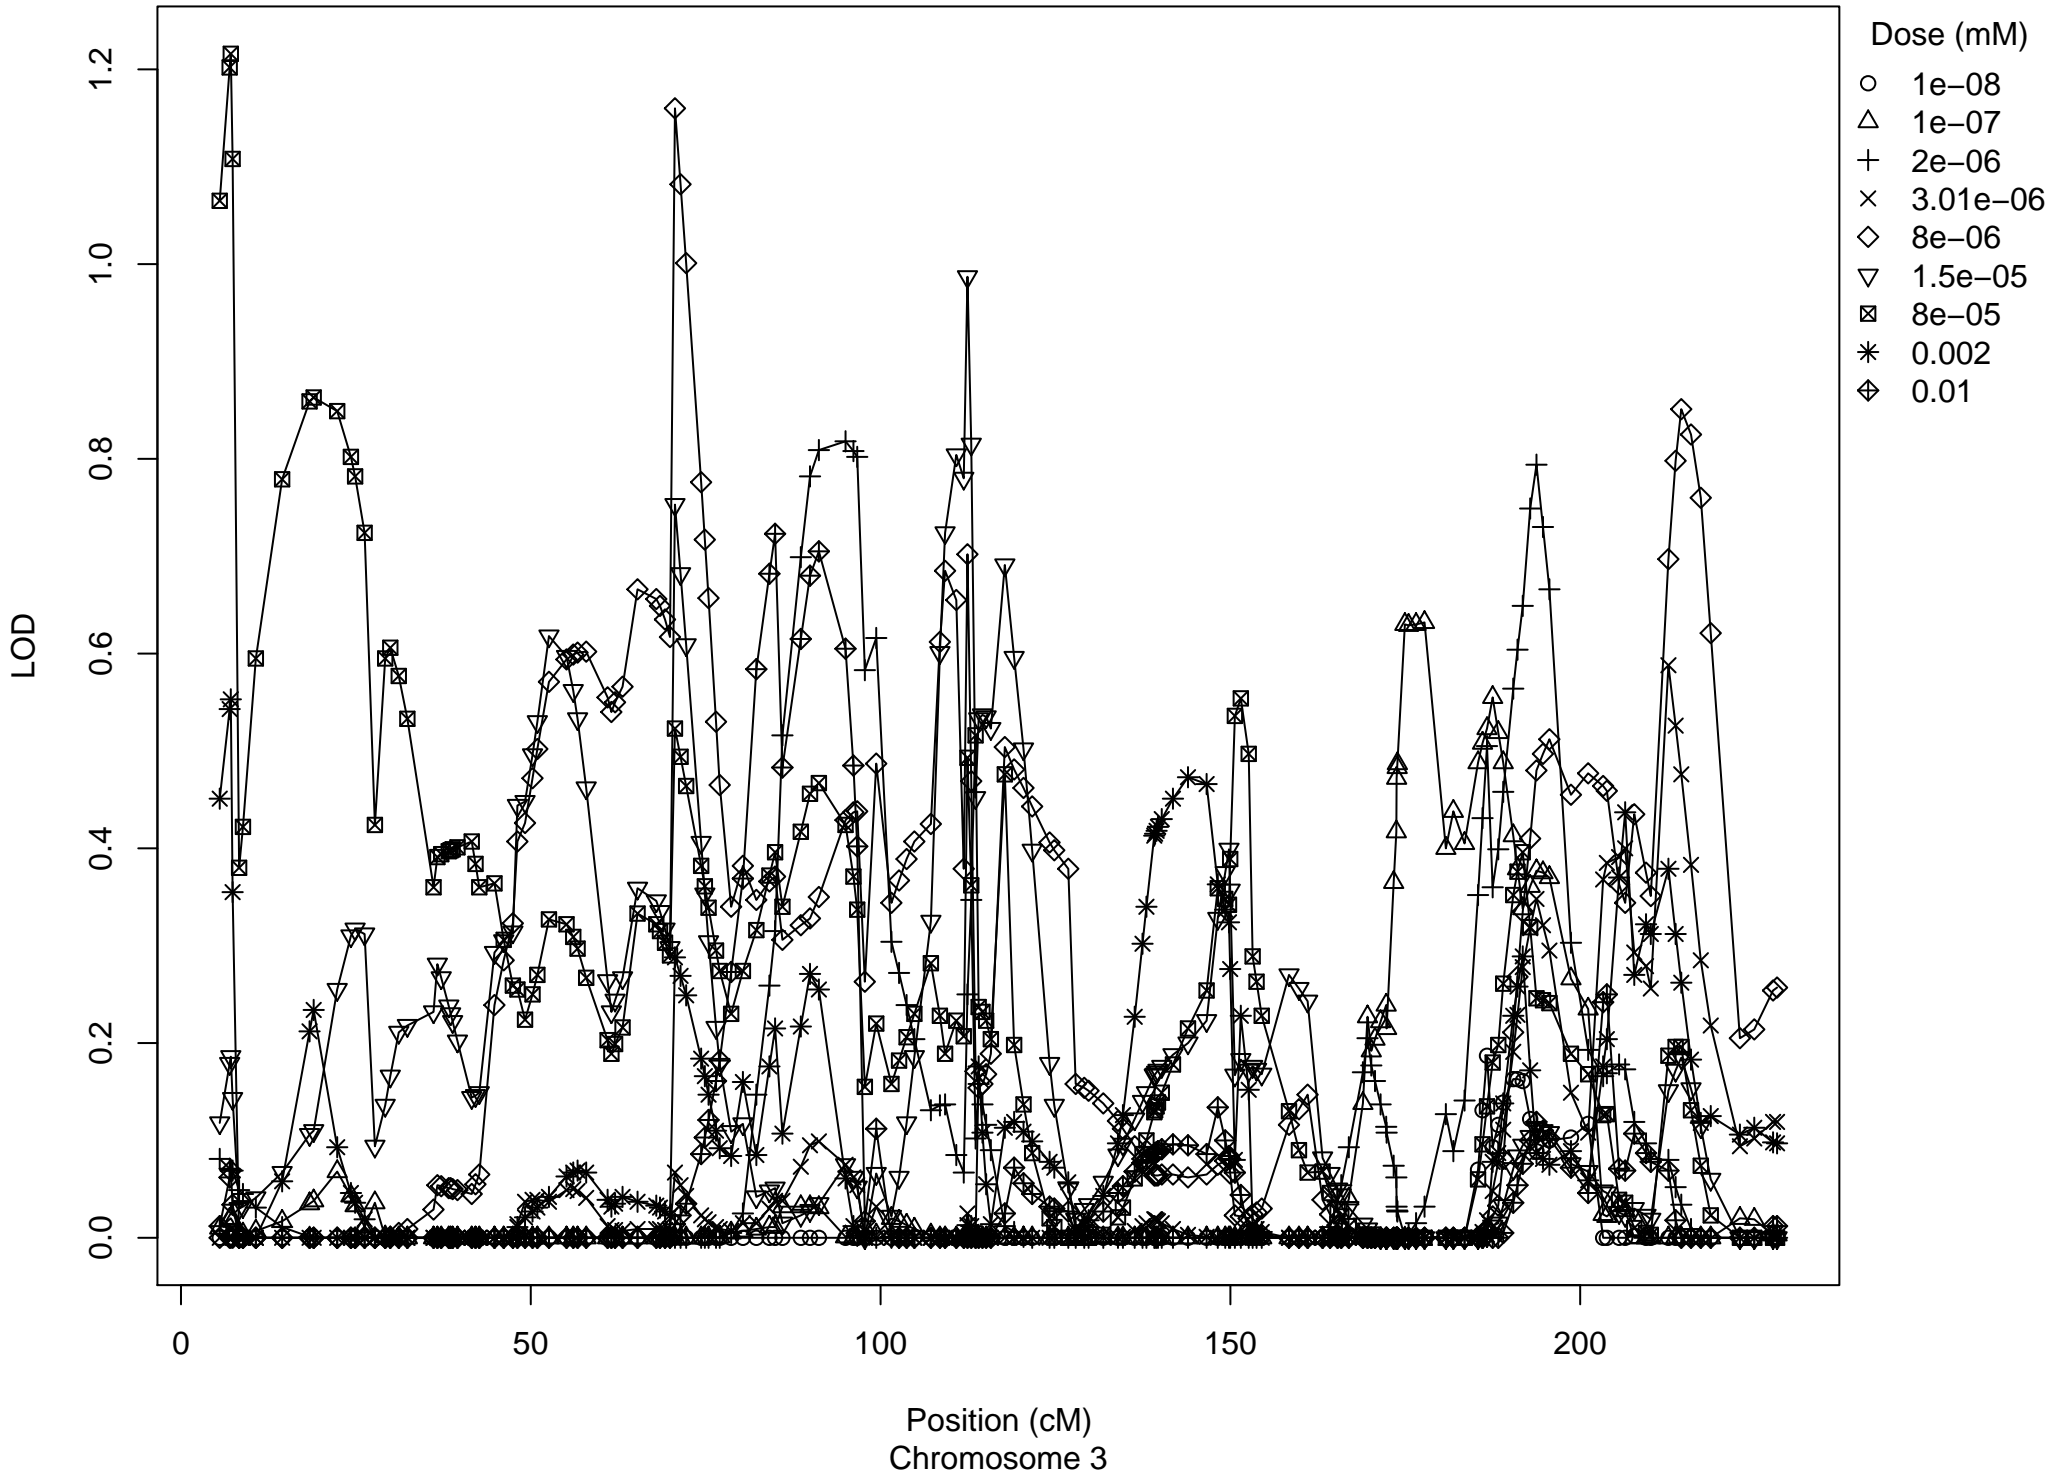

# Camptothecin (CPT)

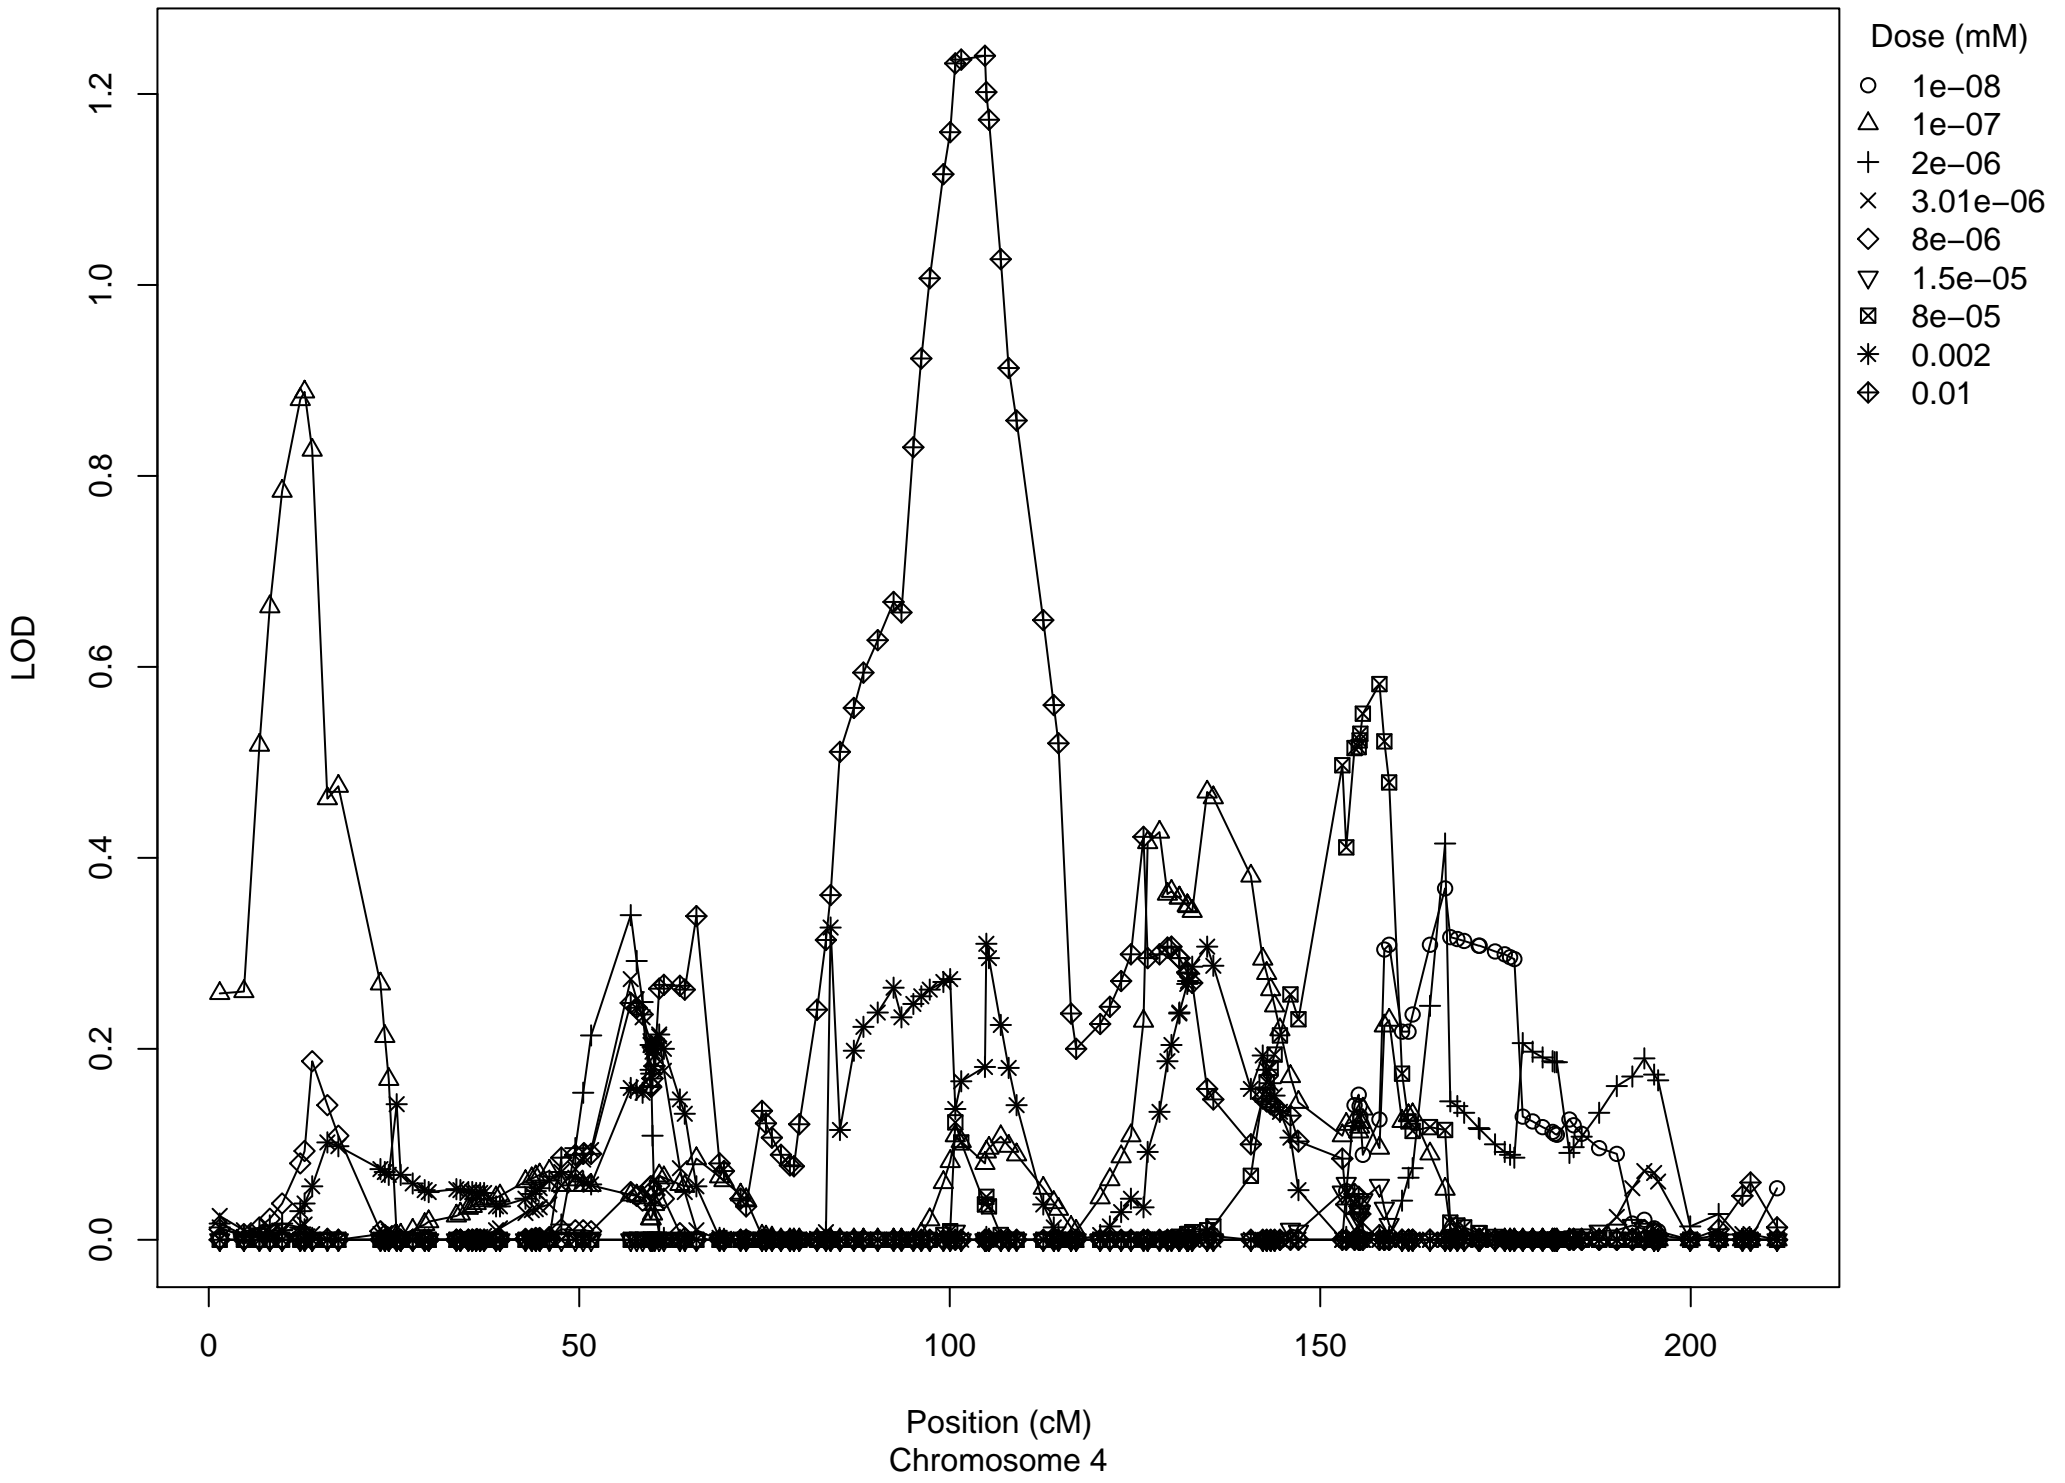

# Camptothecin (CPT)

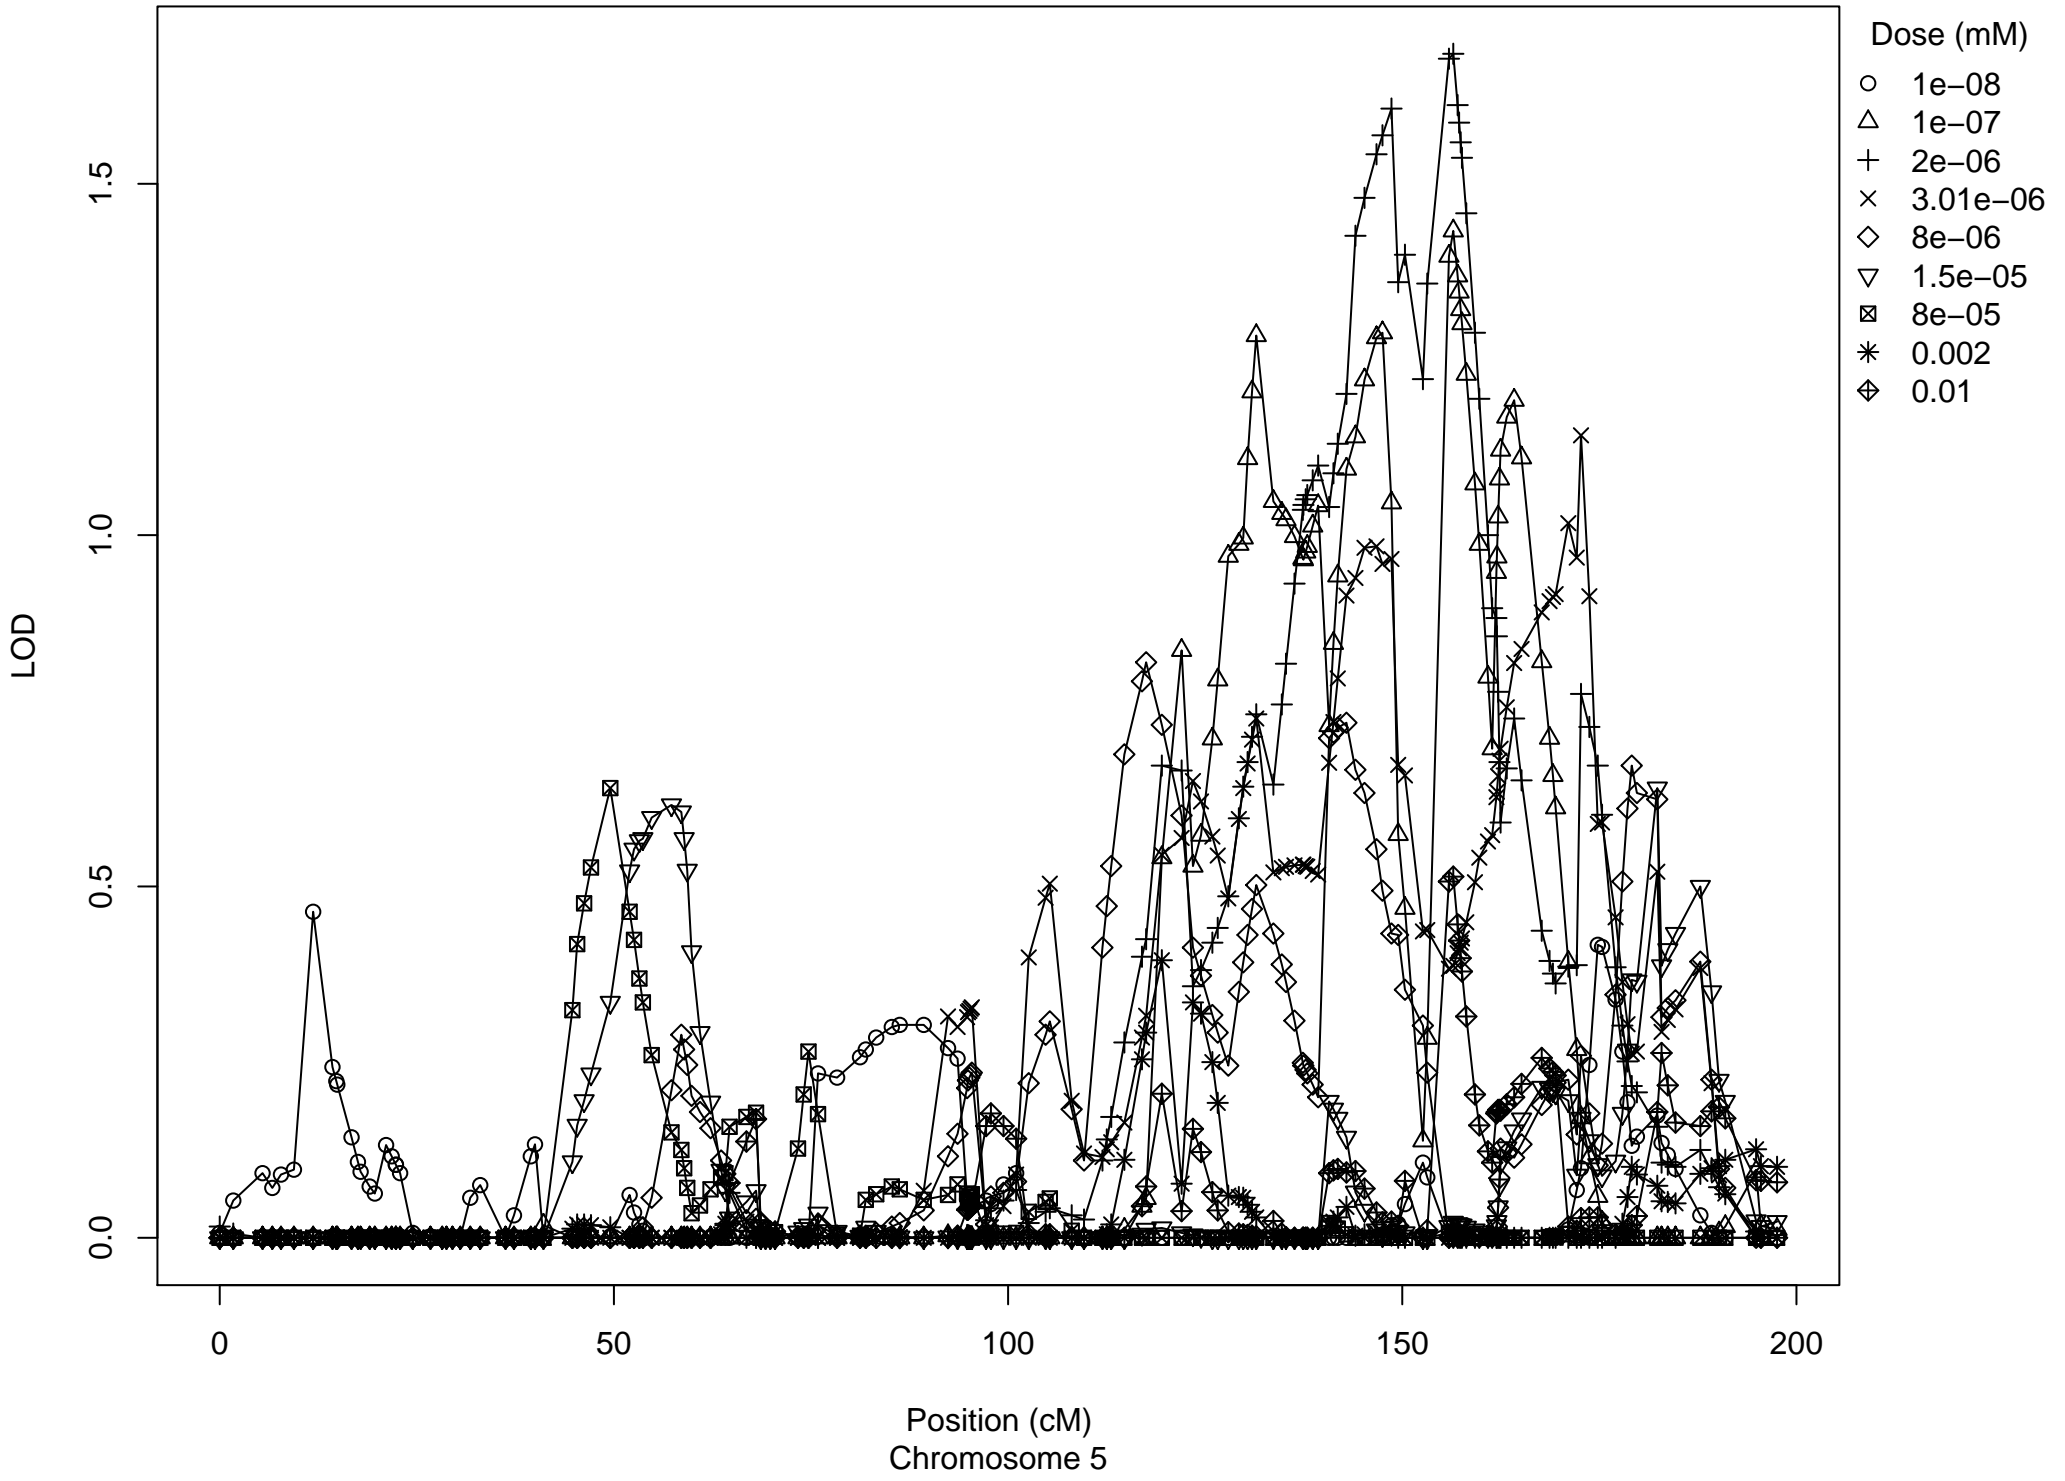

# Camptothecin (CPT)

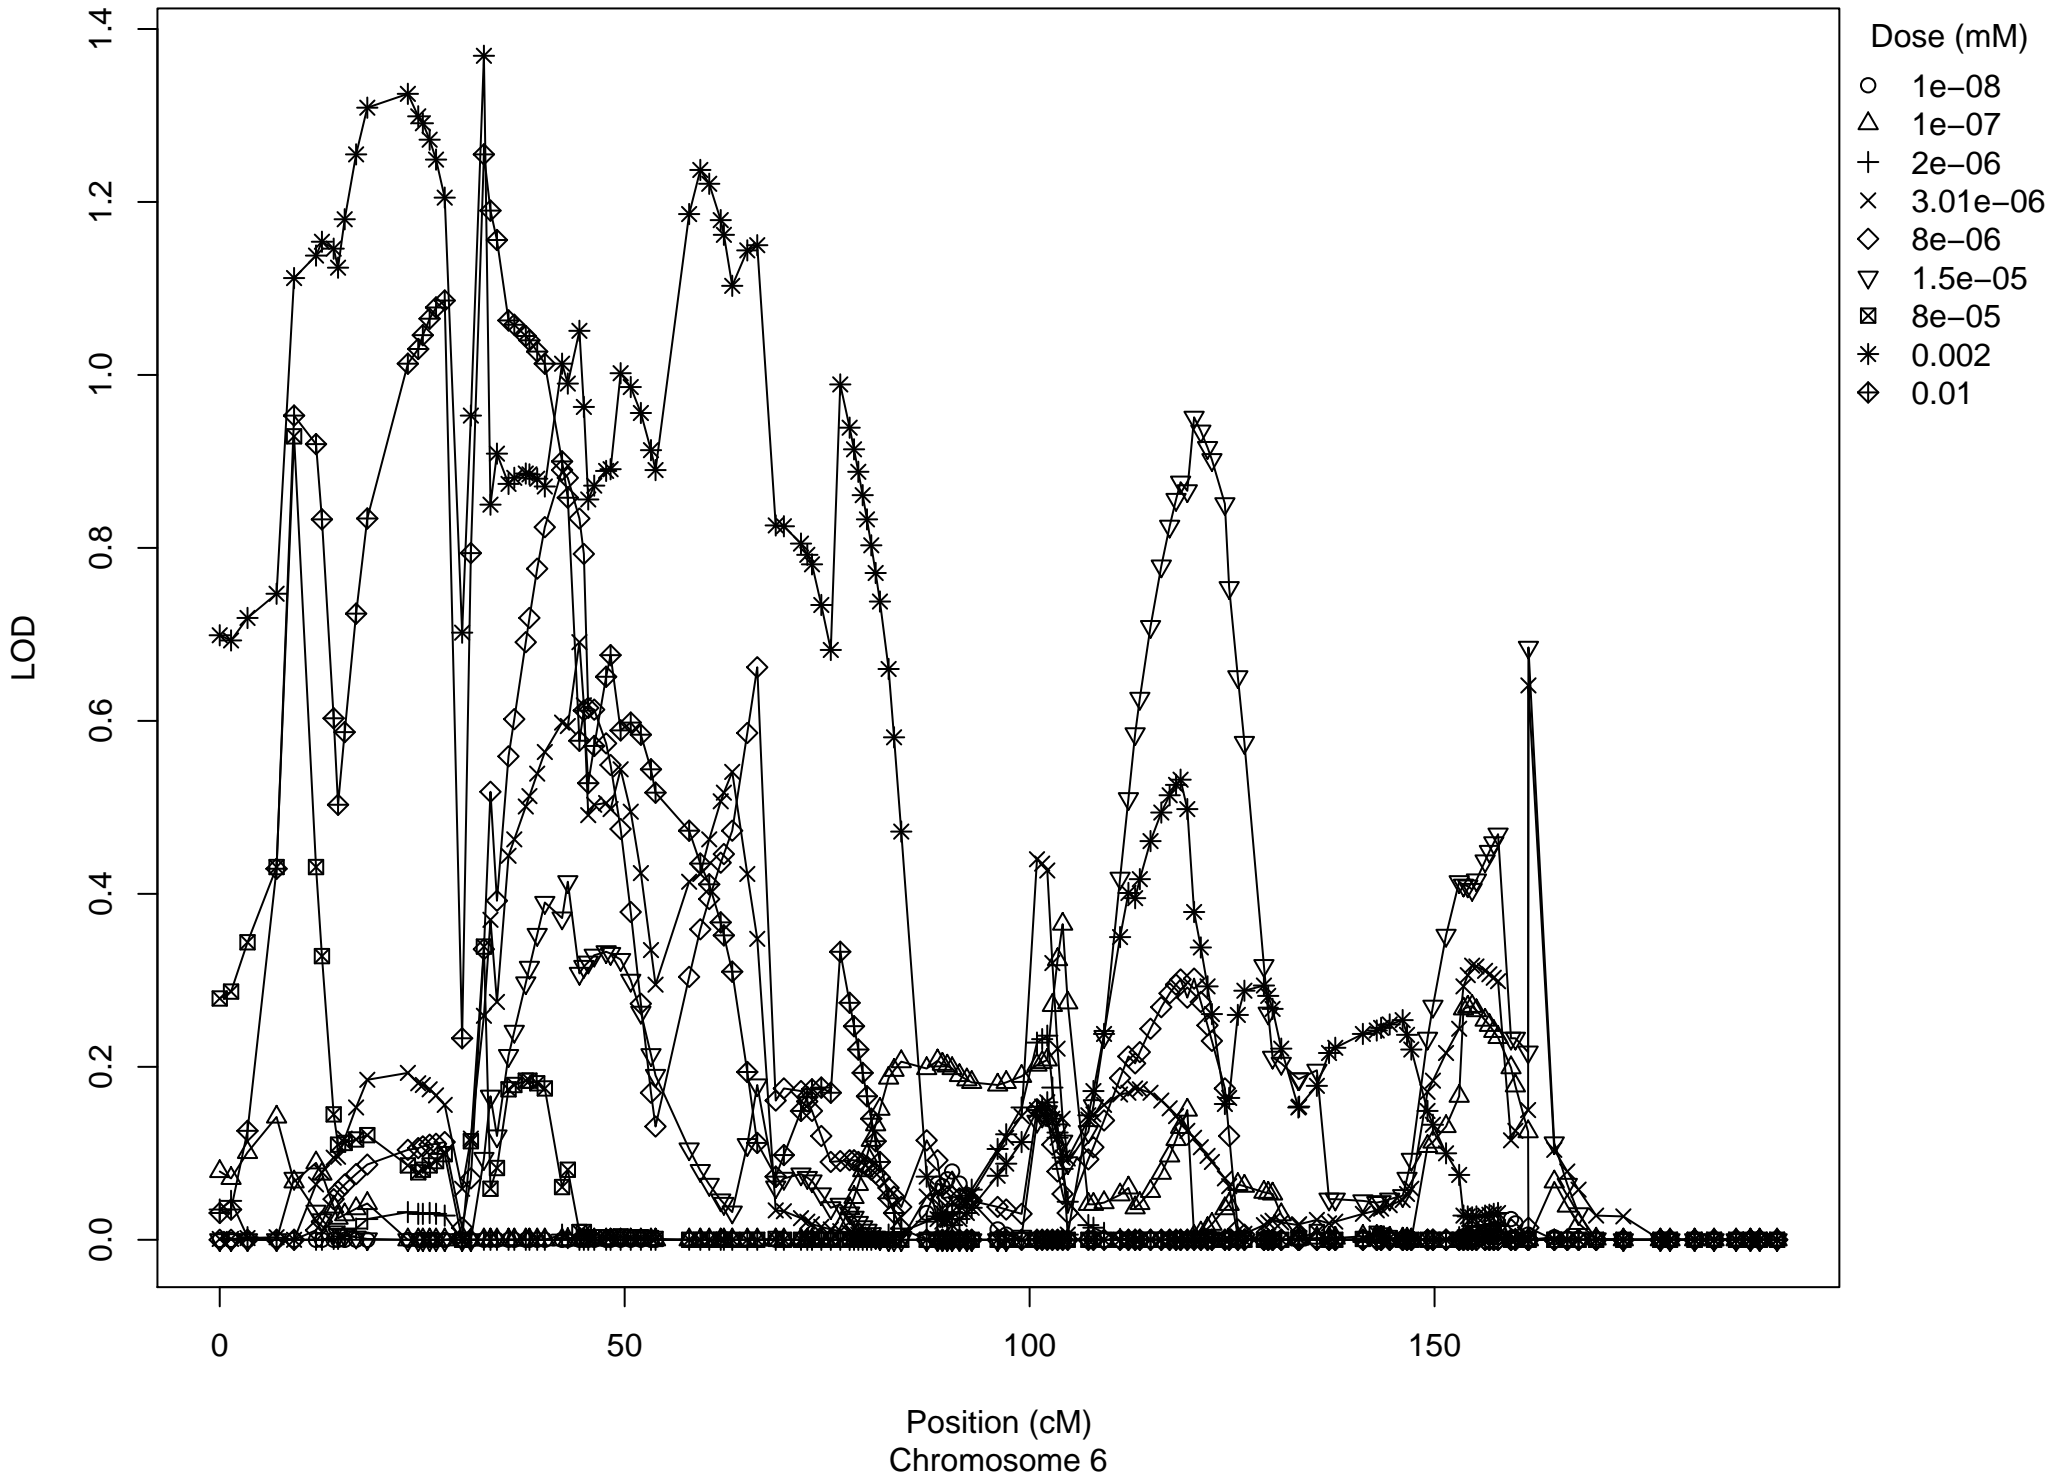





# Camptothecin (CPT)

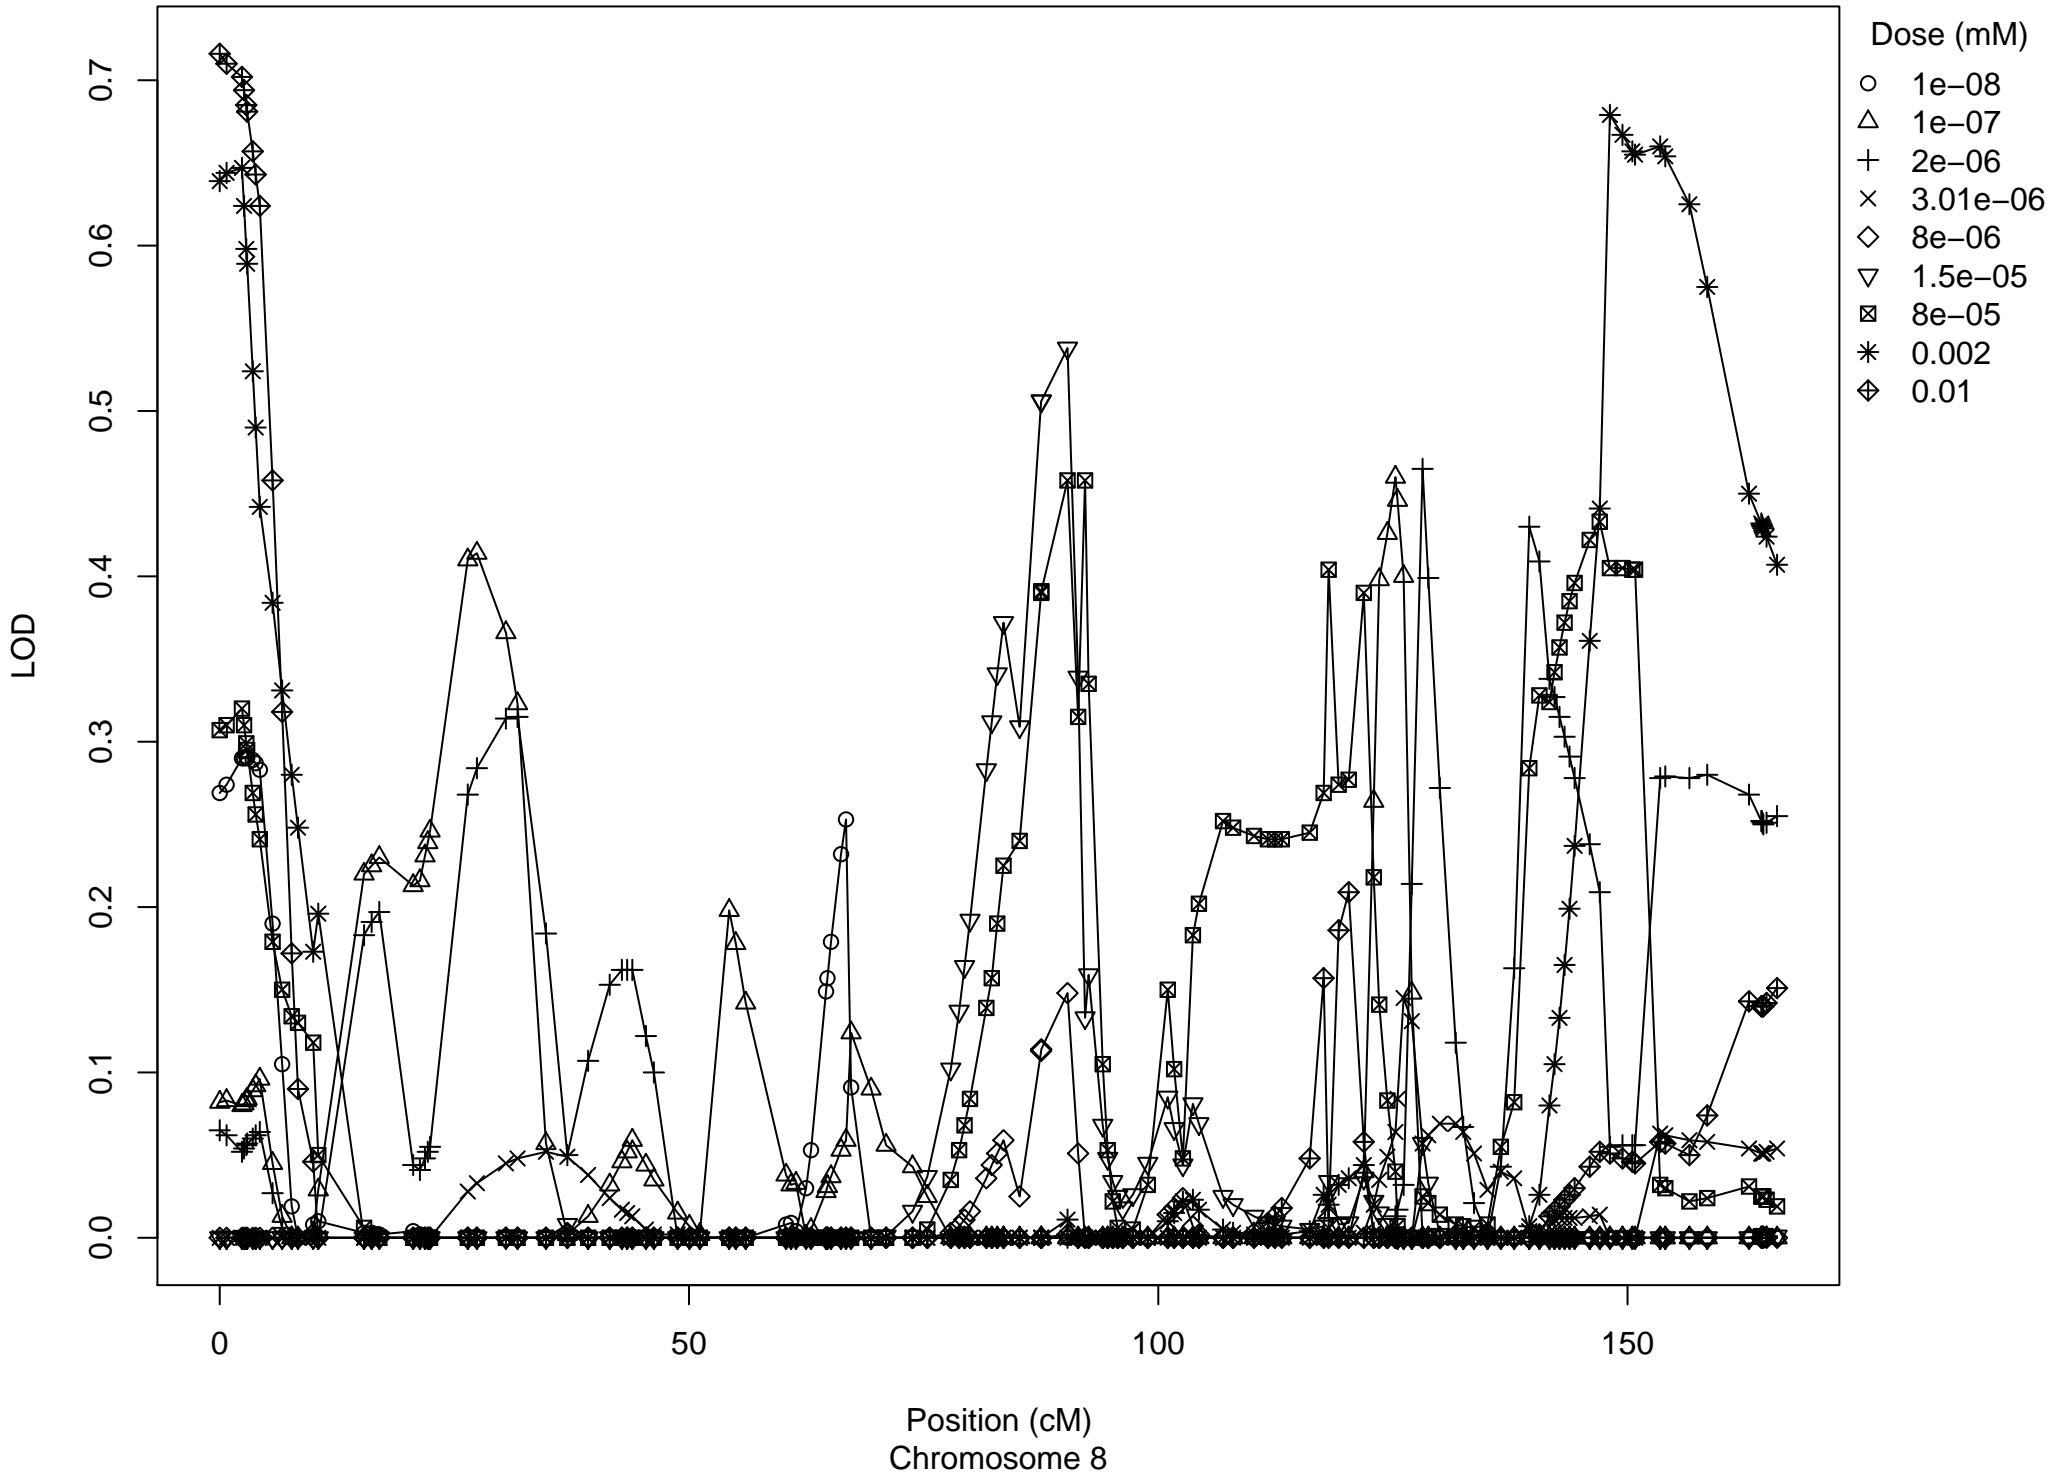



# Camptothecin (CPT)

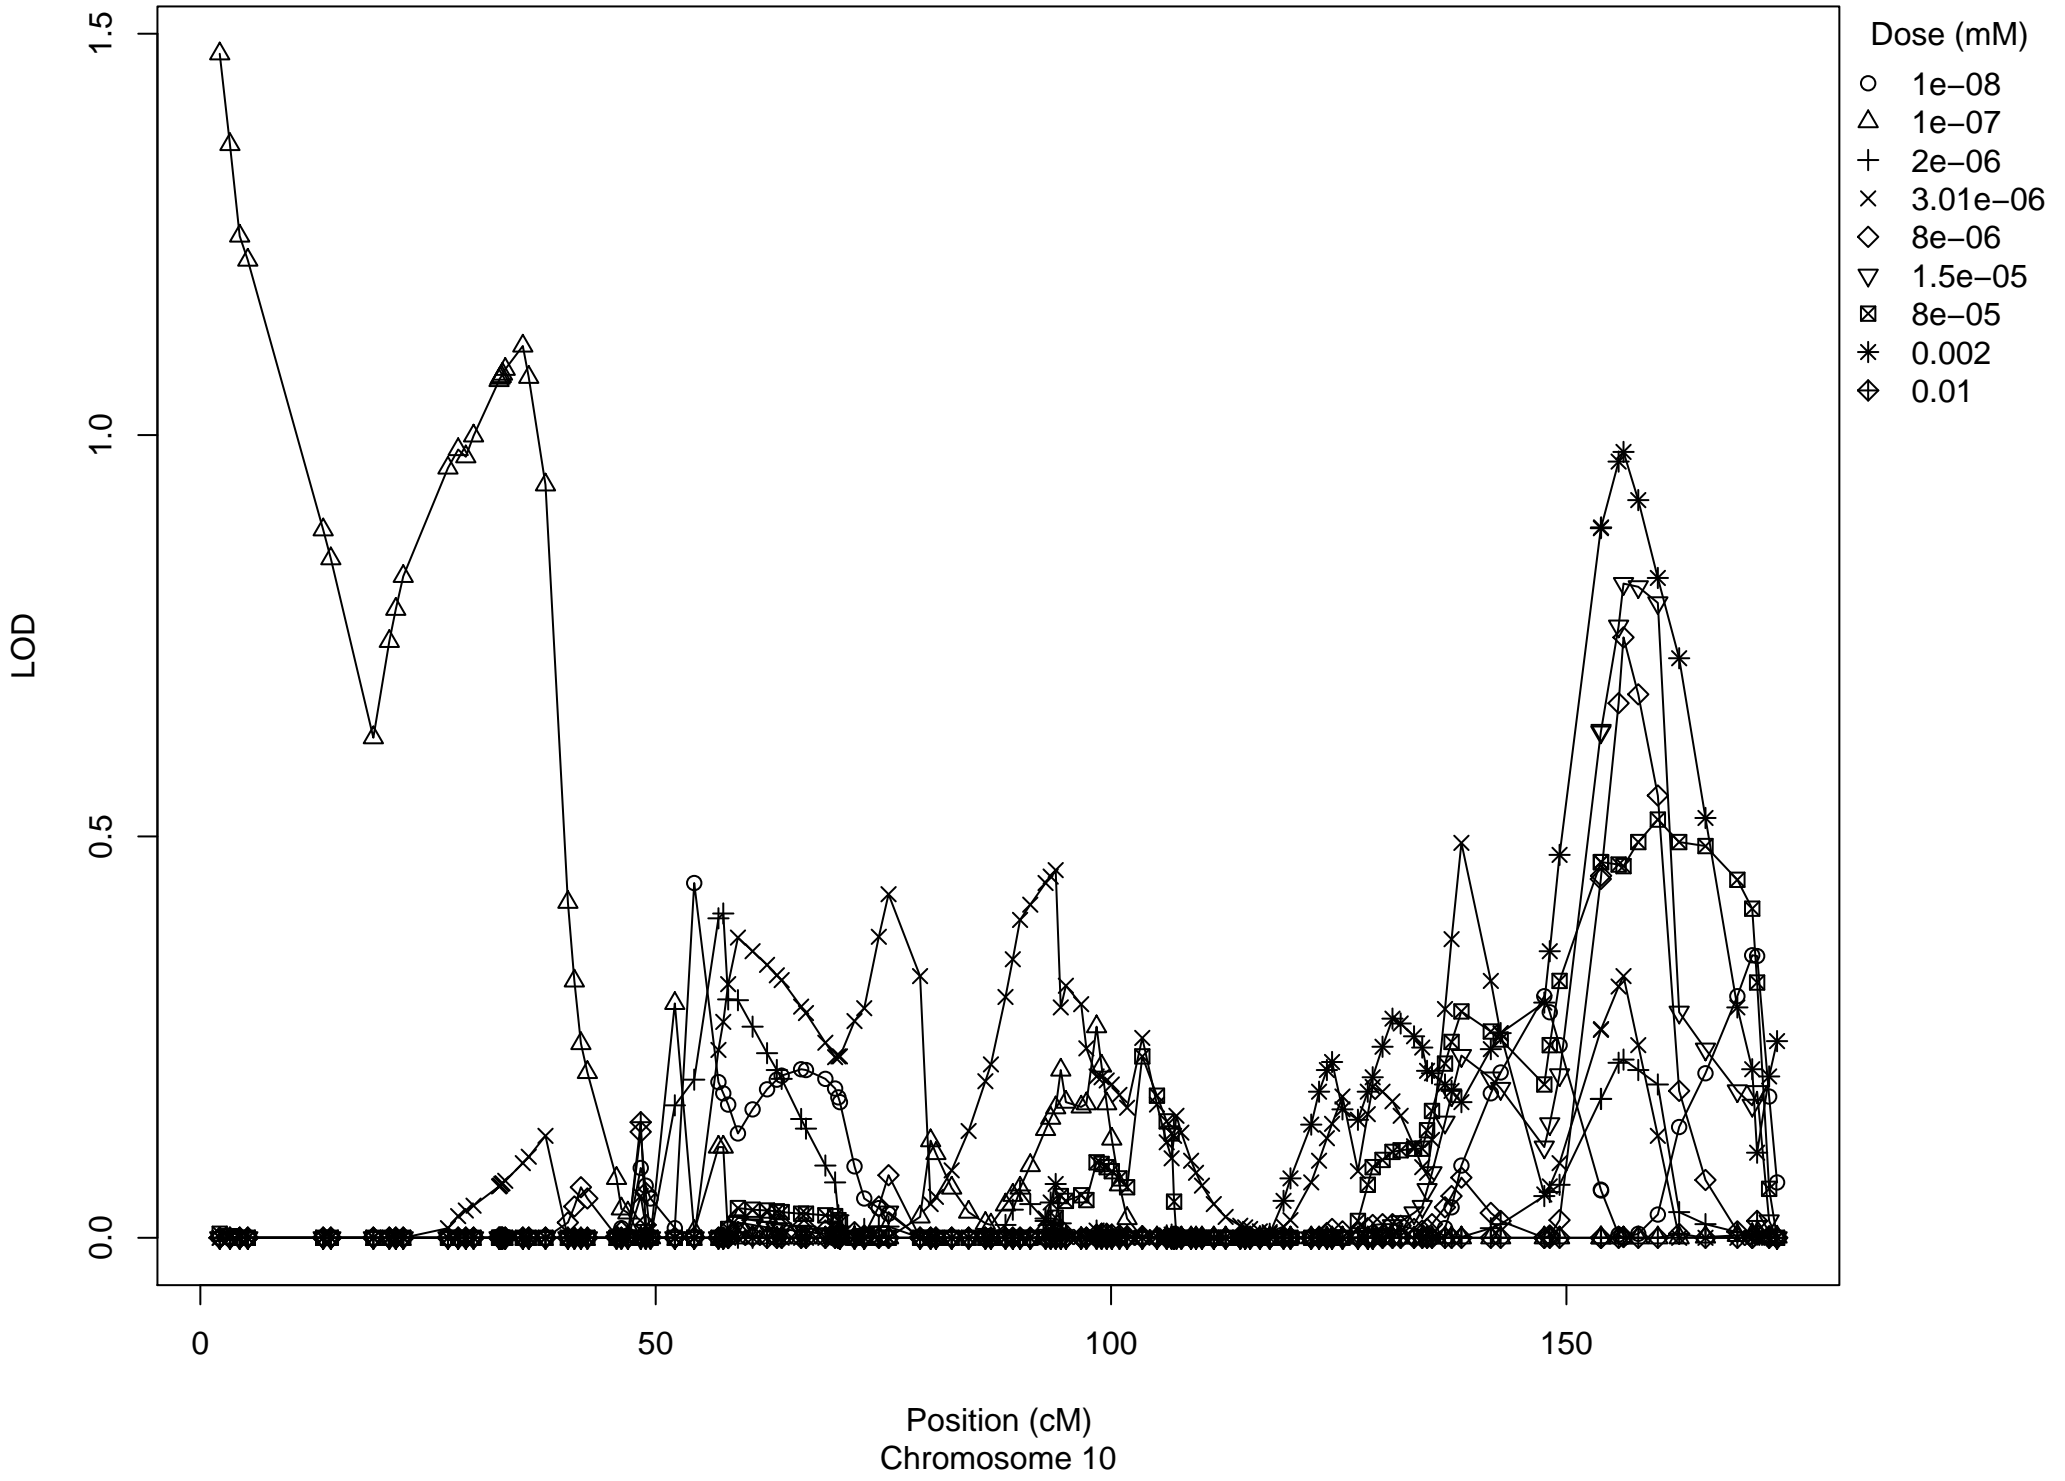

# Camptothecin (CPT)

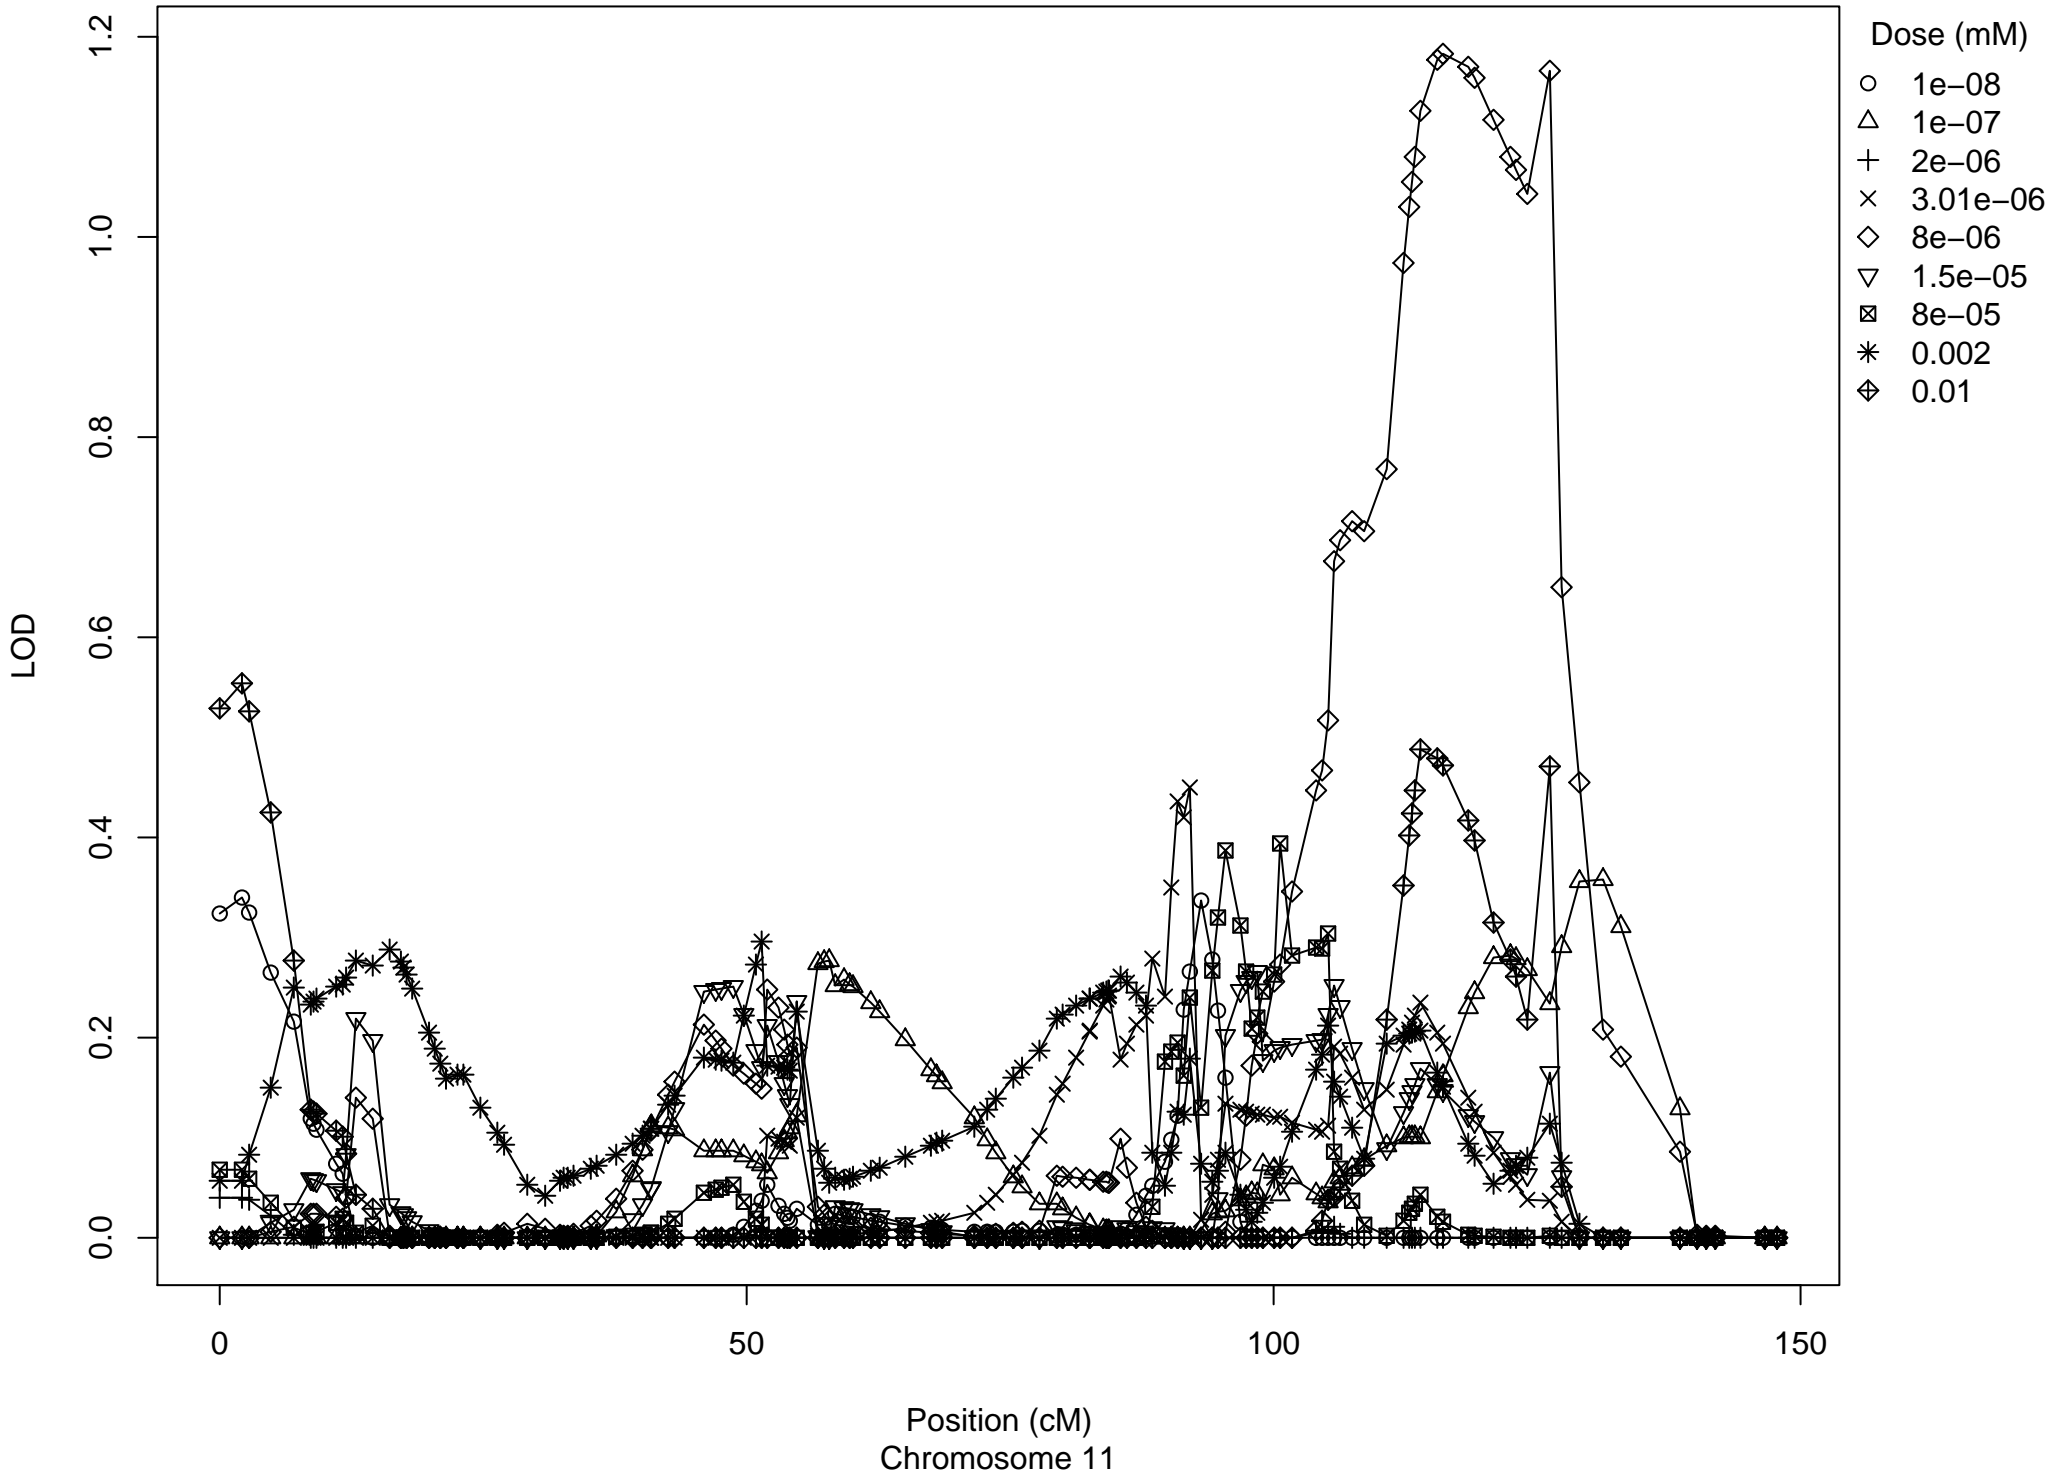

# Camptothecin (CPT)

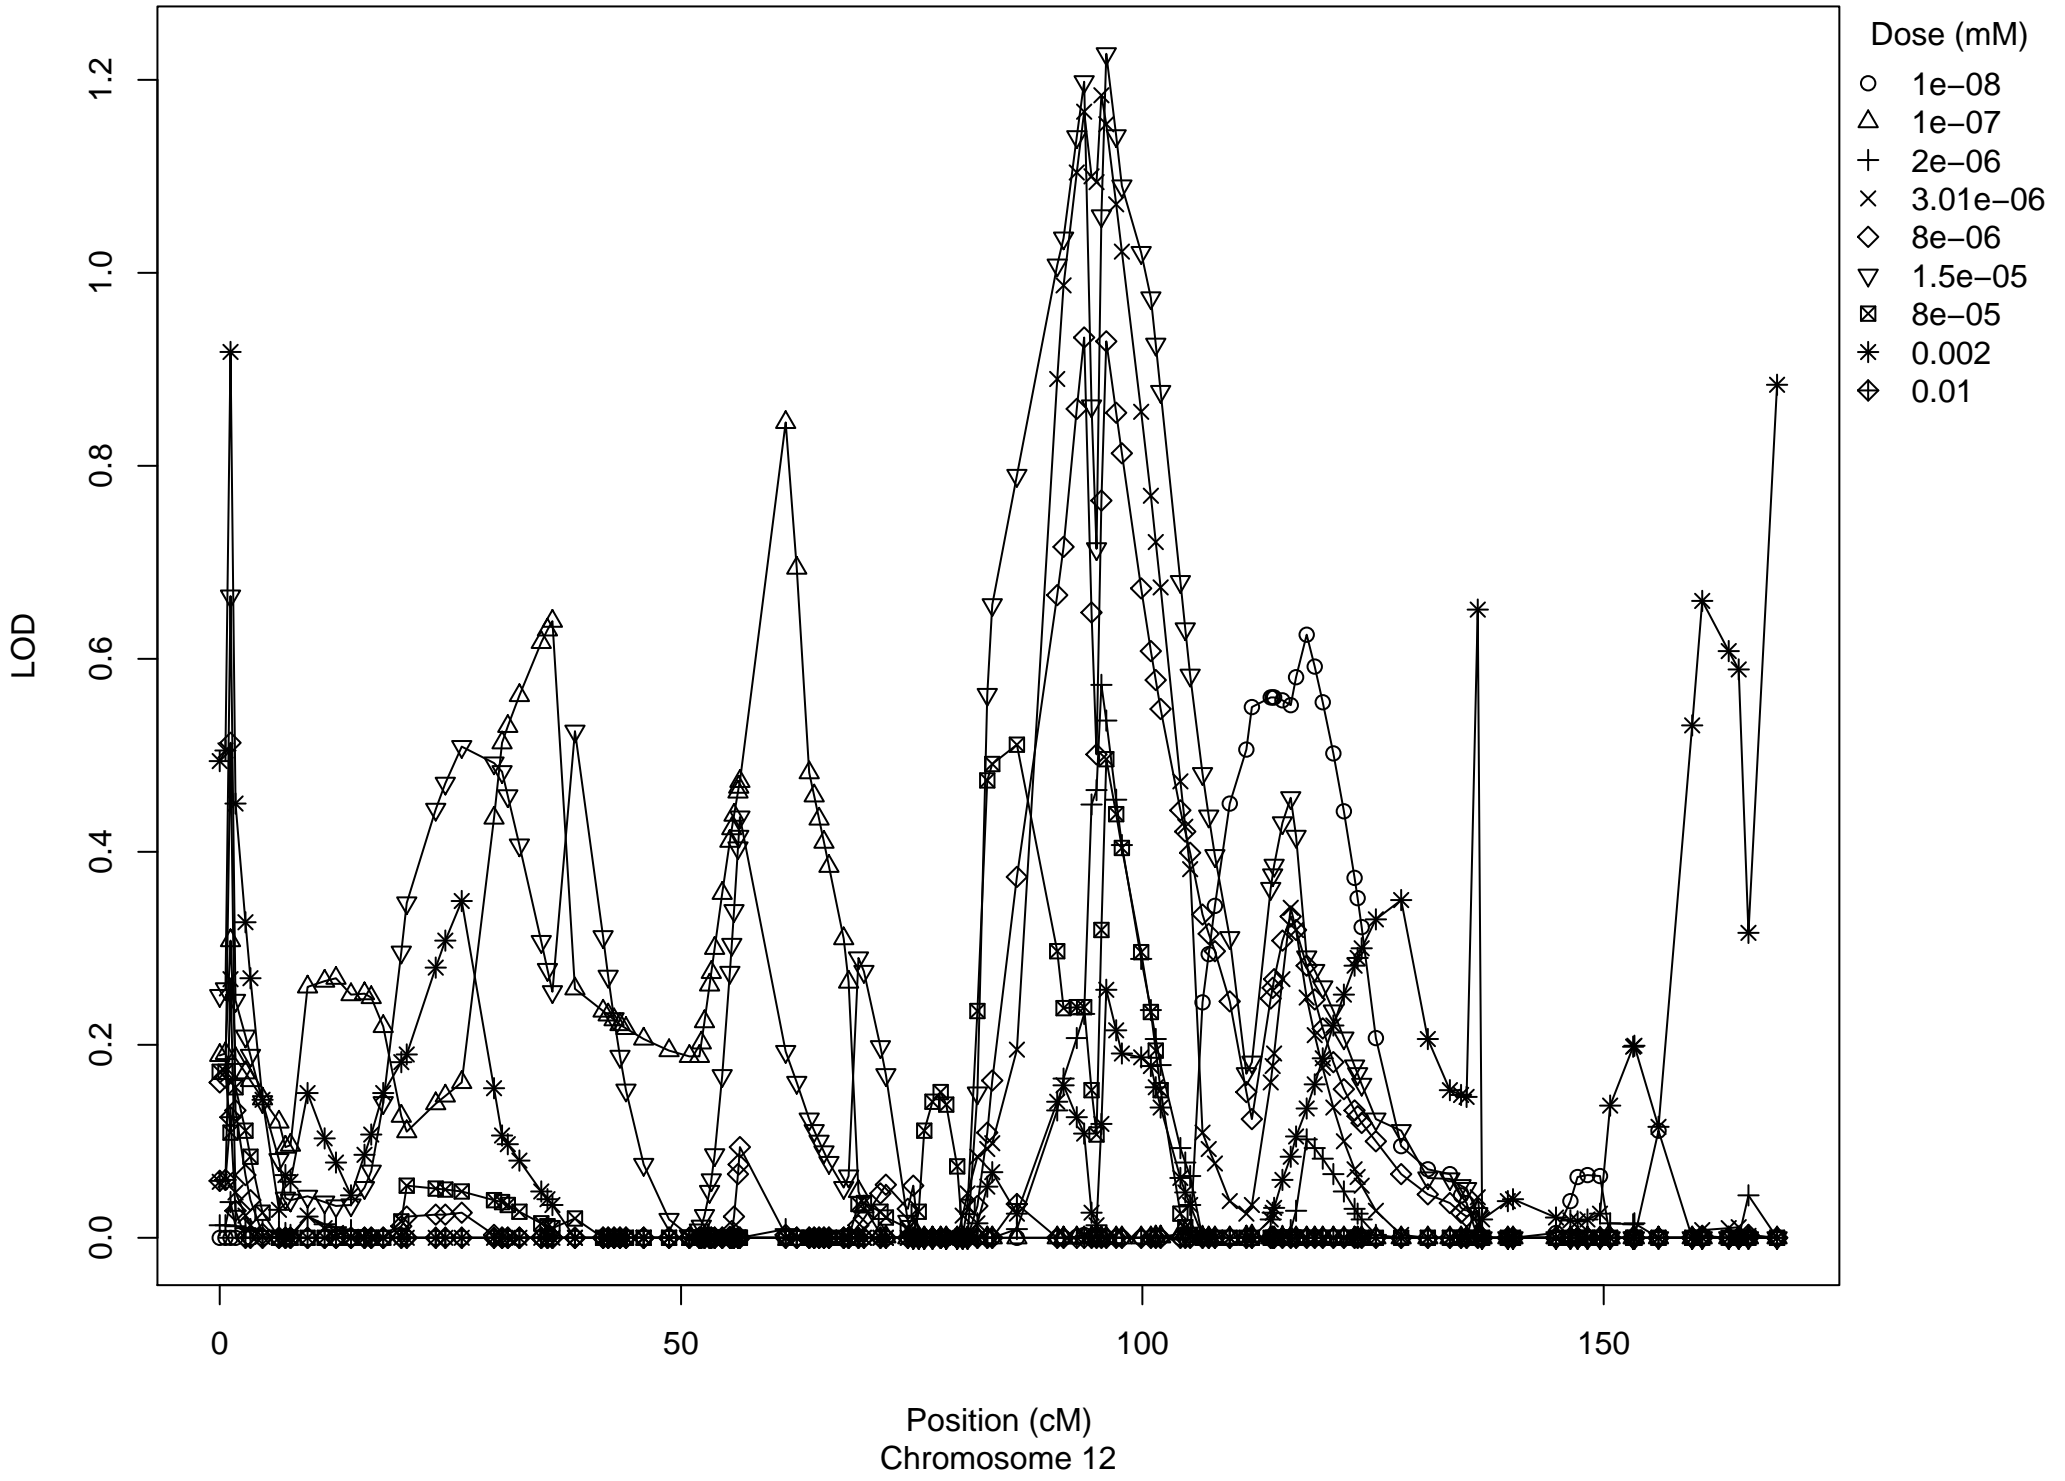

# Camptothecin (CPT)

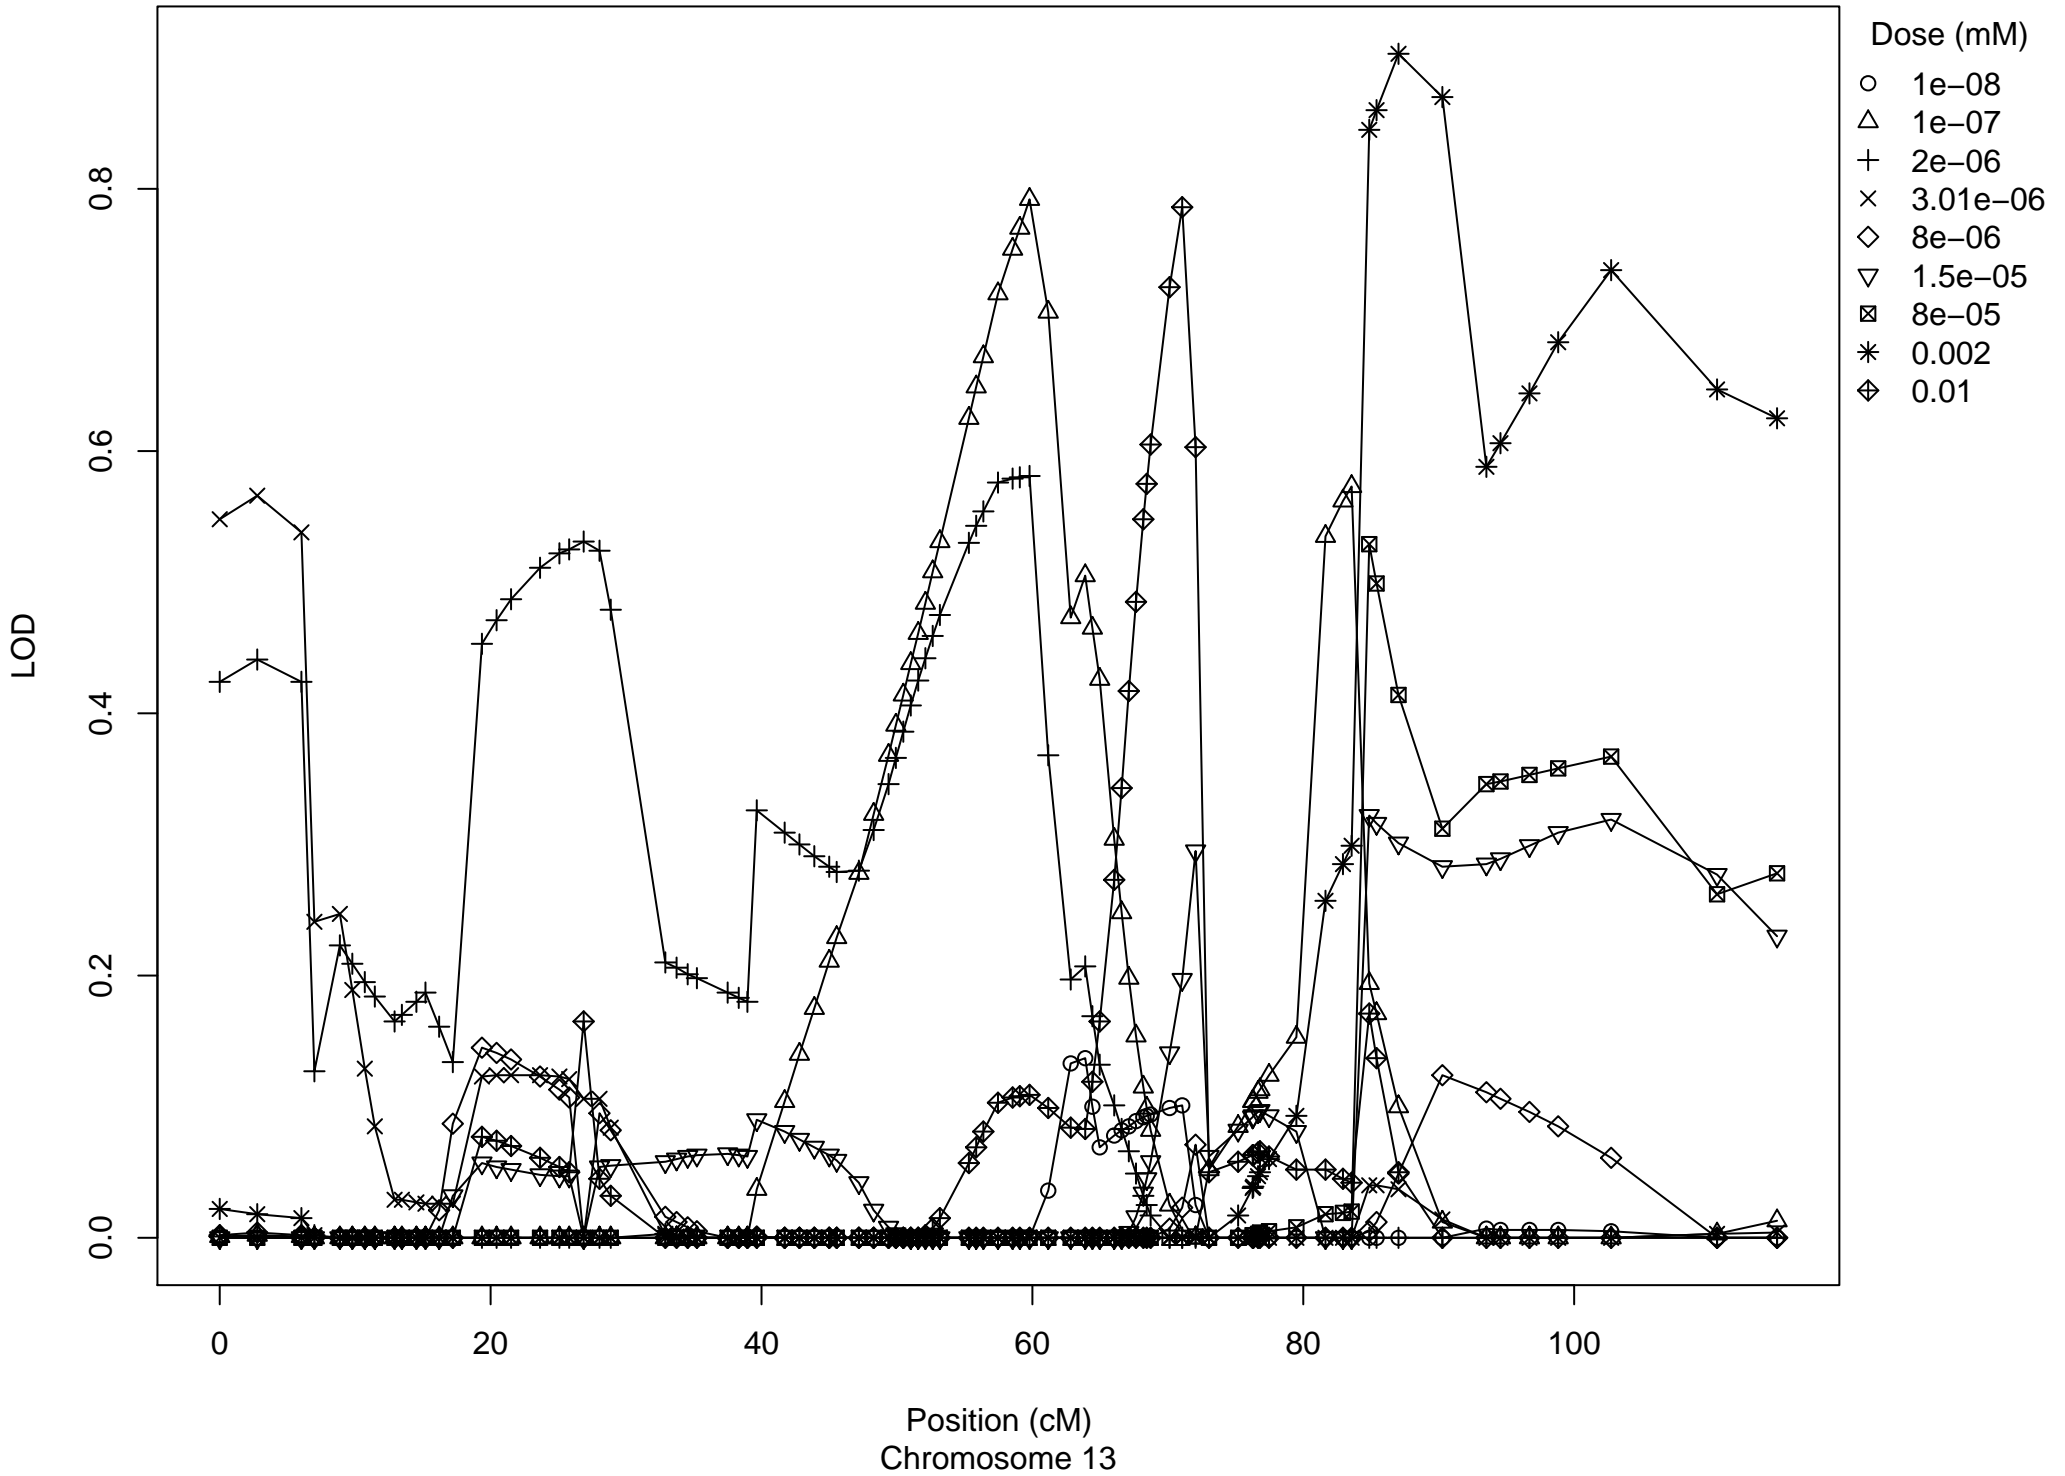

# Camptothecin (CPT)

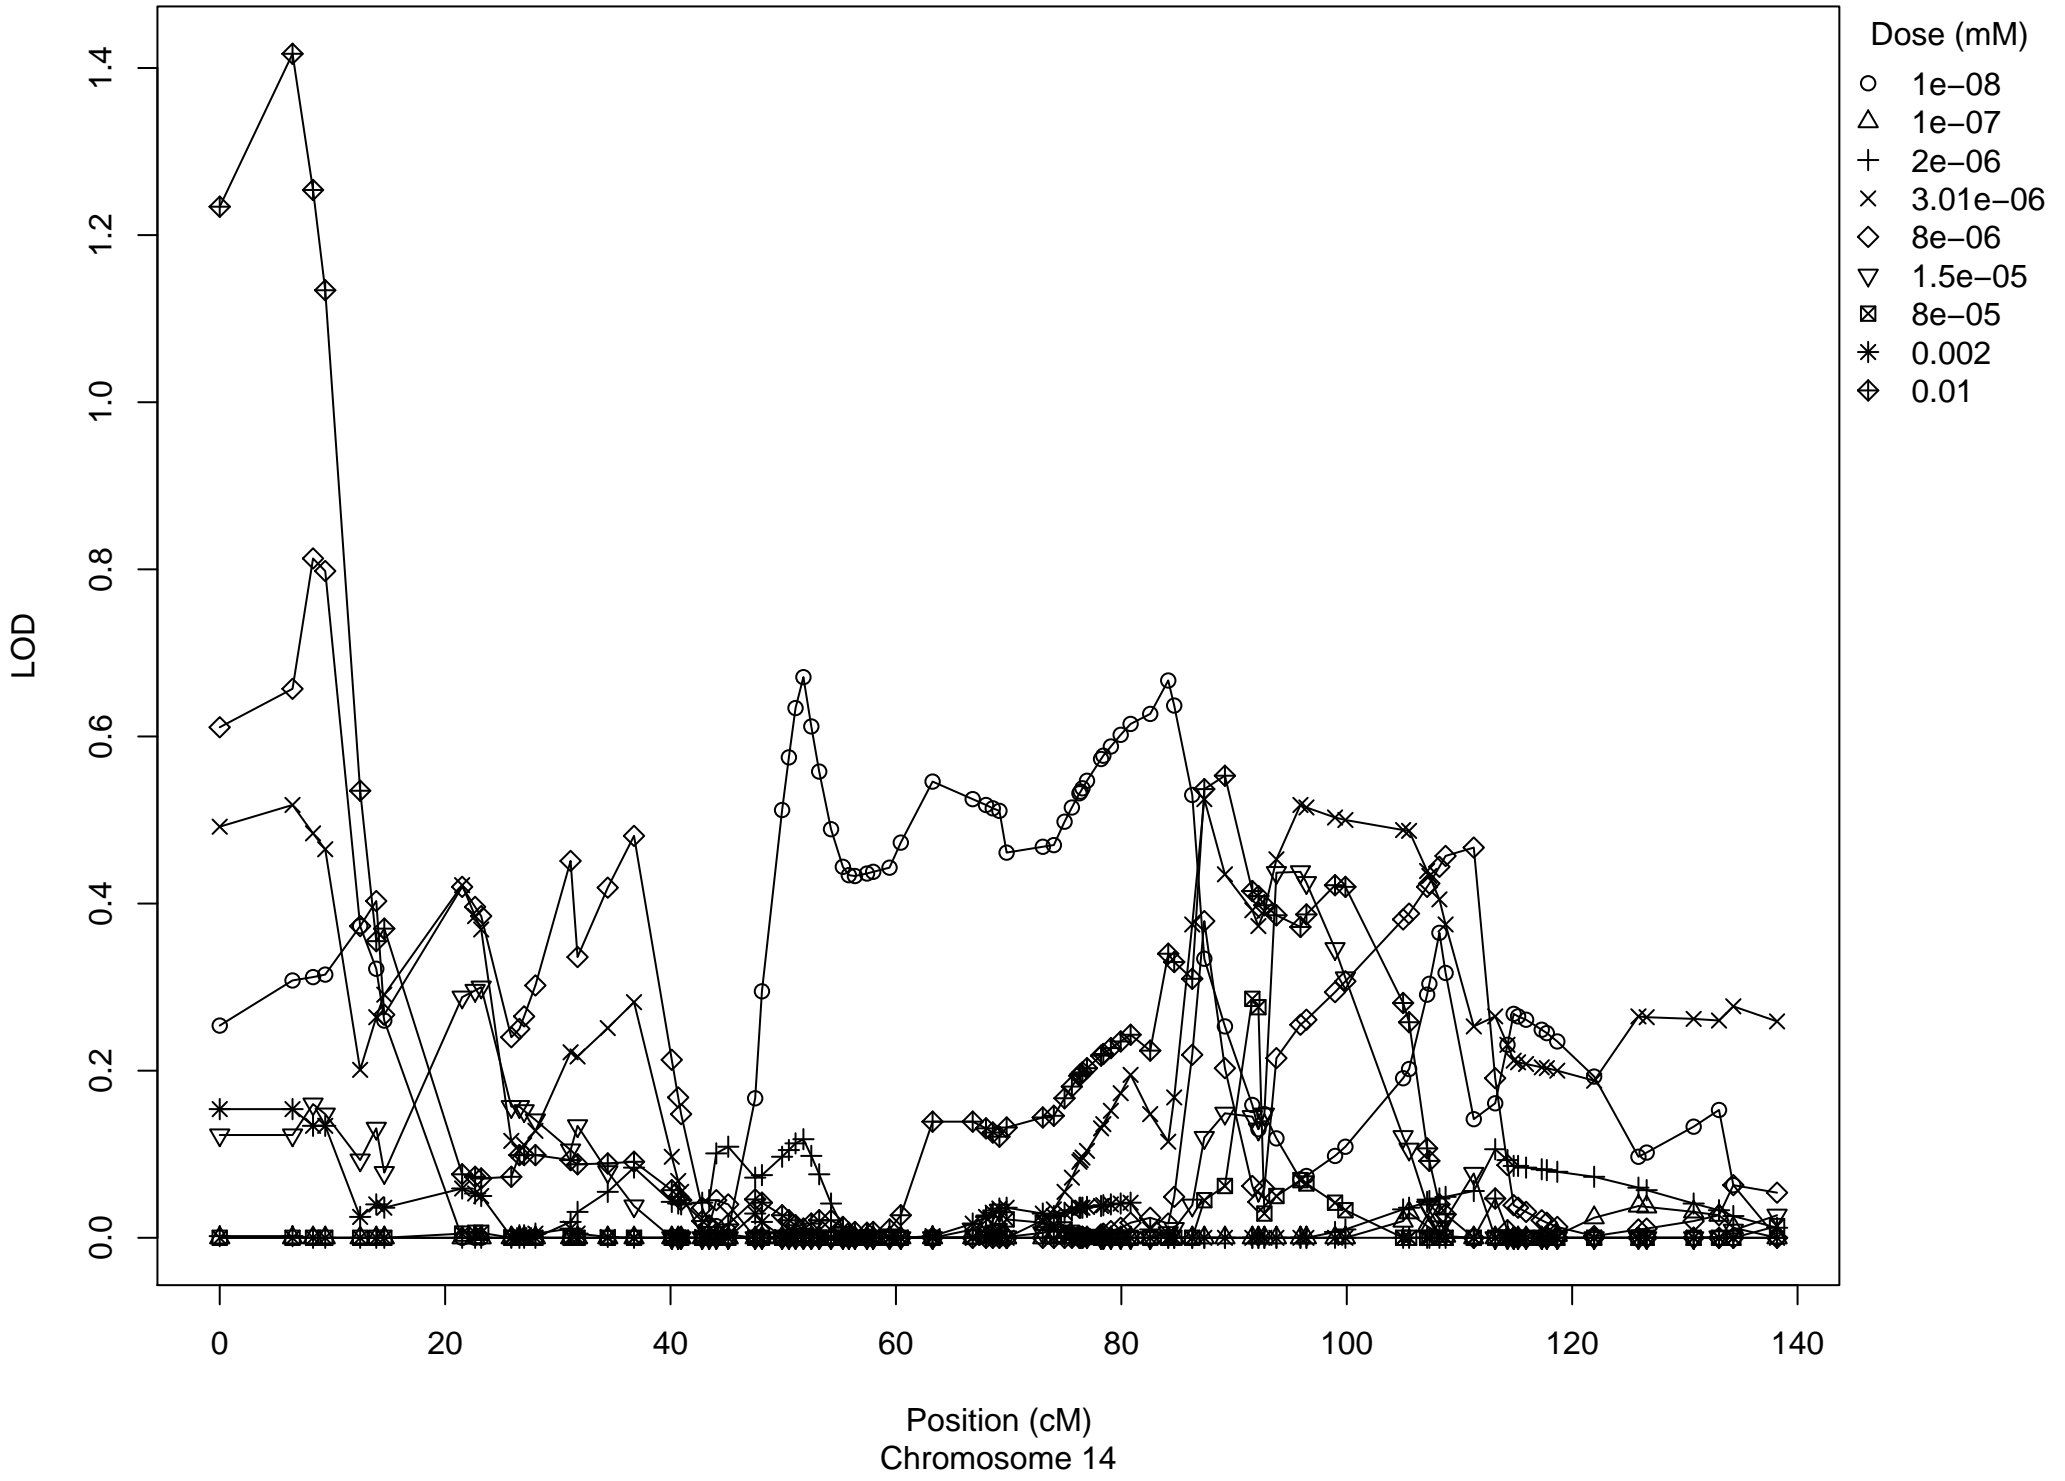



# Camptothecin (CPT)

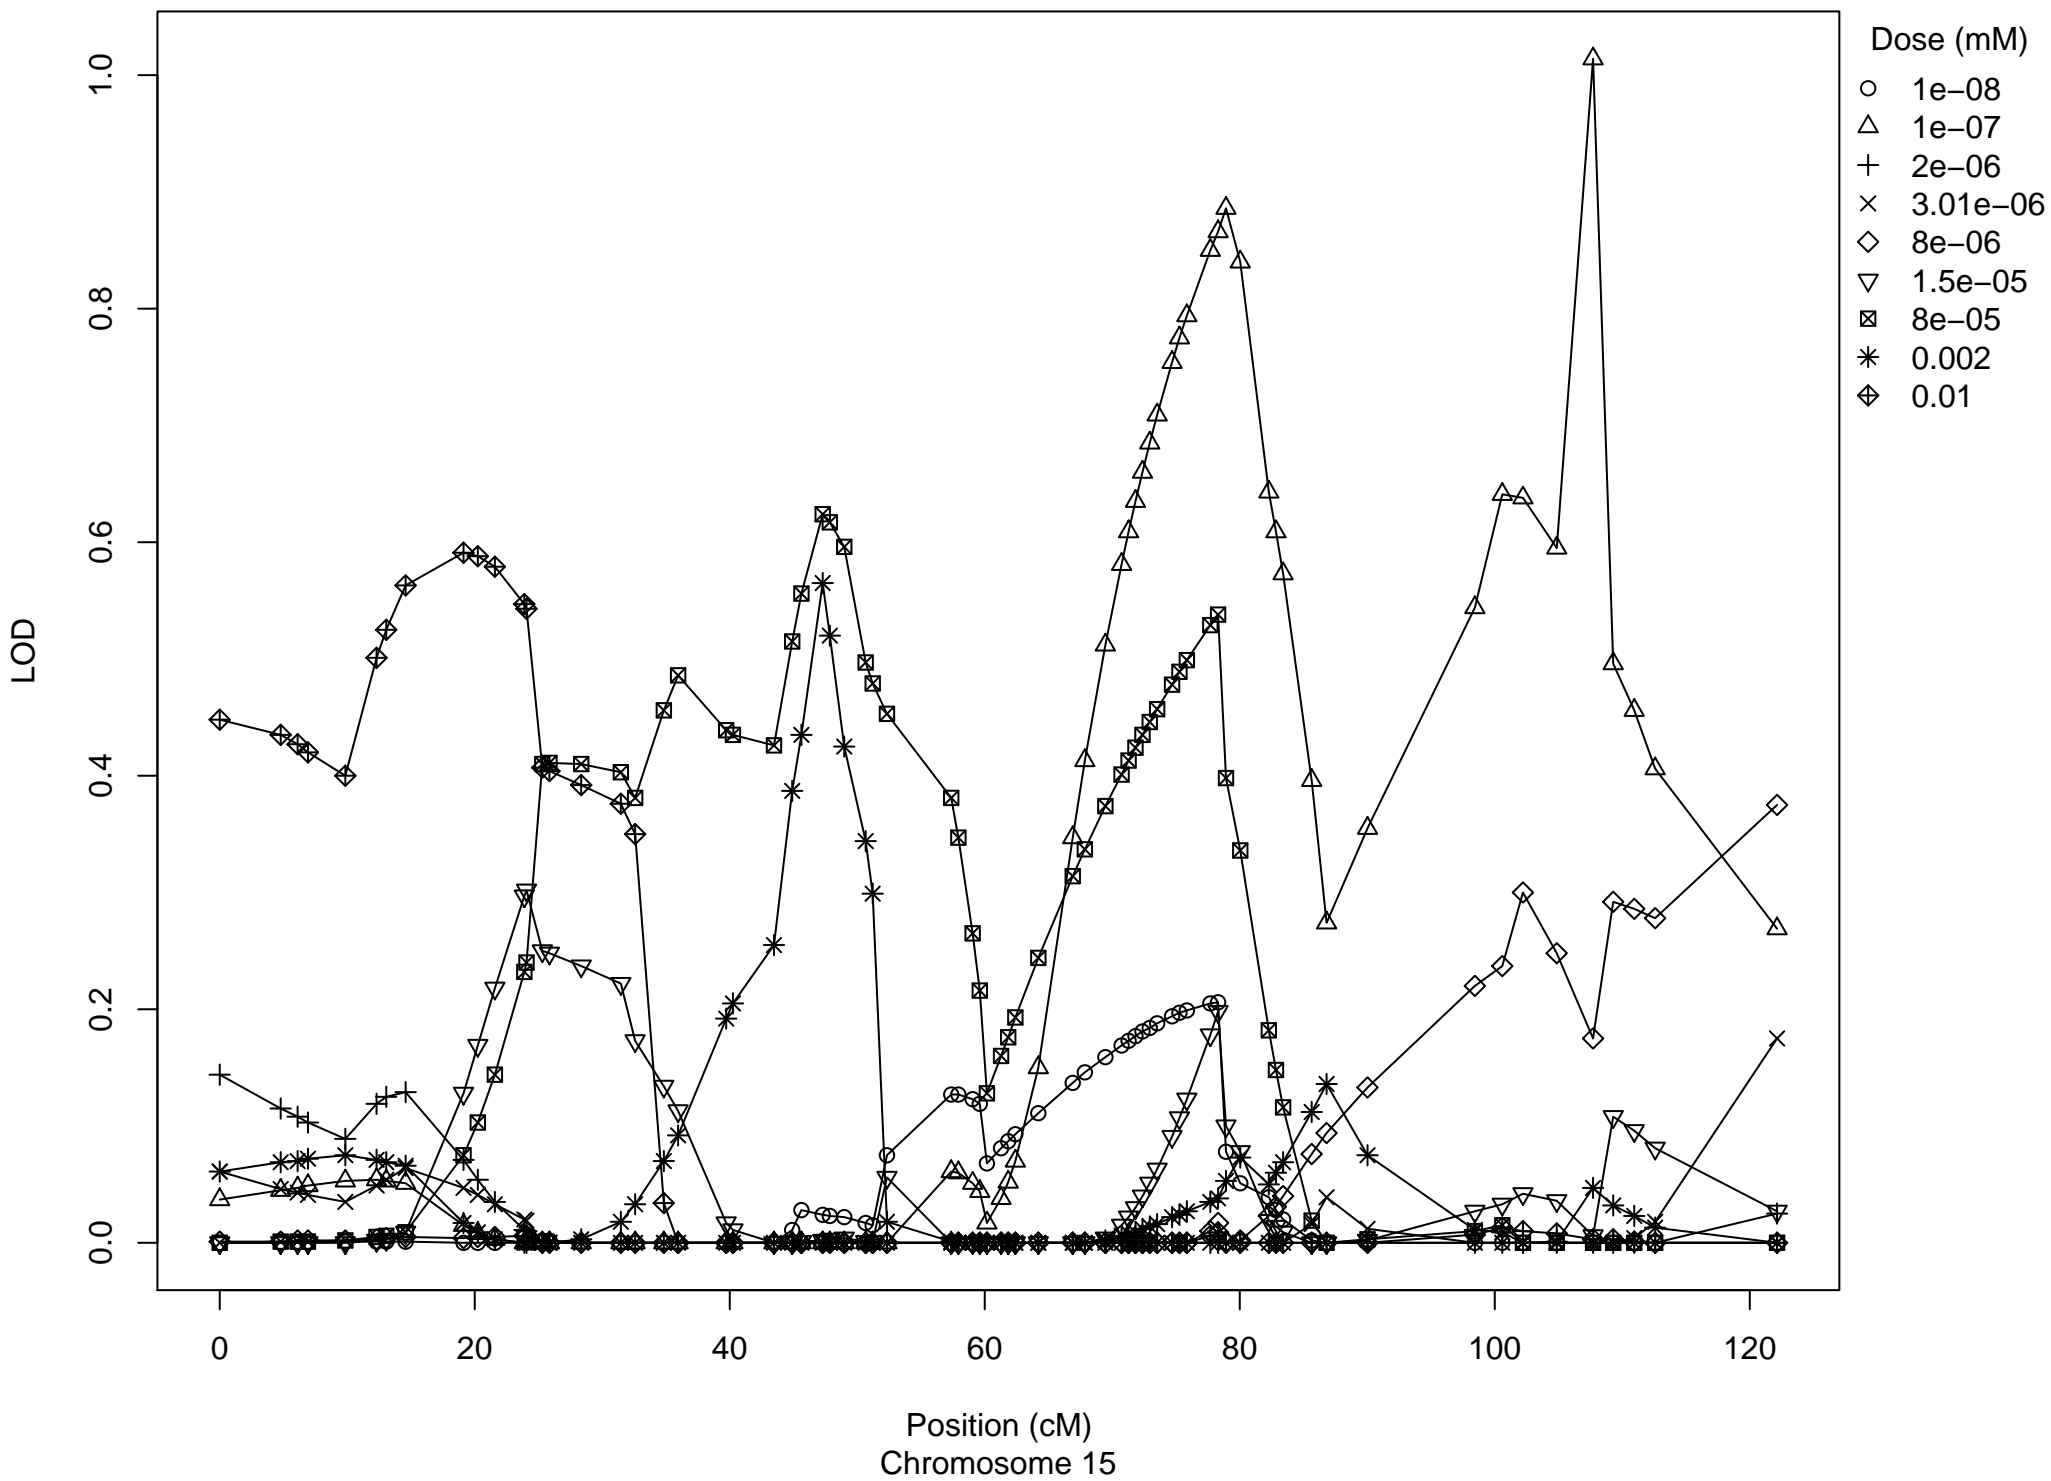



# Camptothecin (CPT)

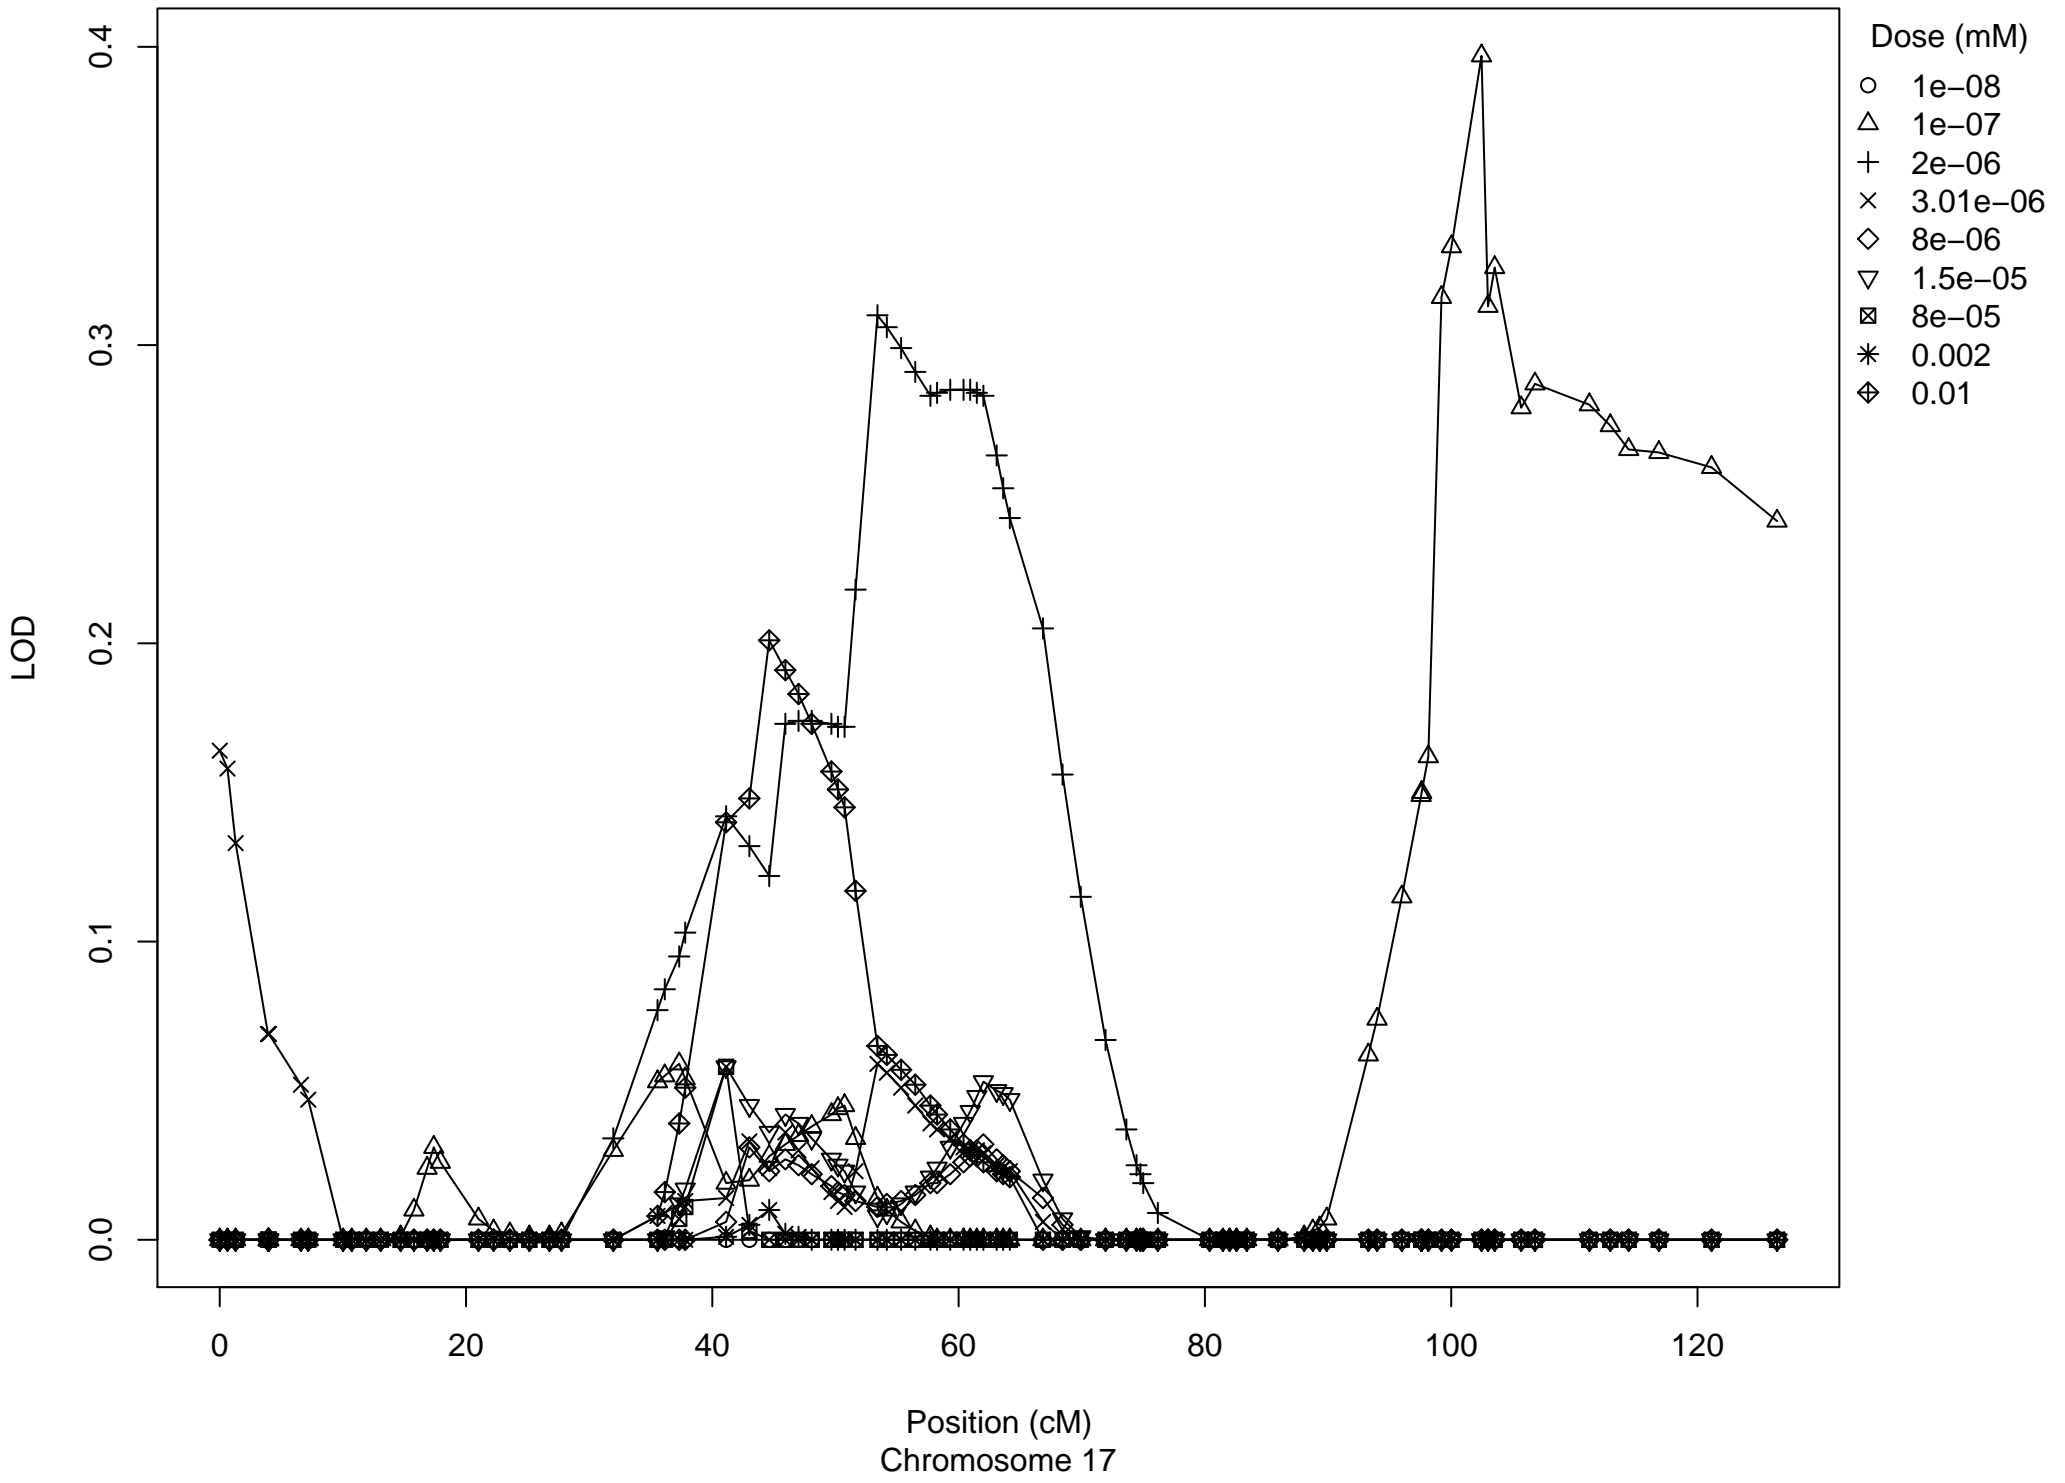



# Camptothecin (CPT)

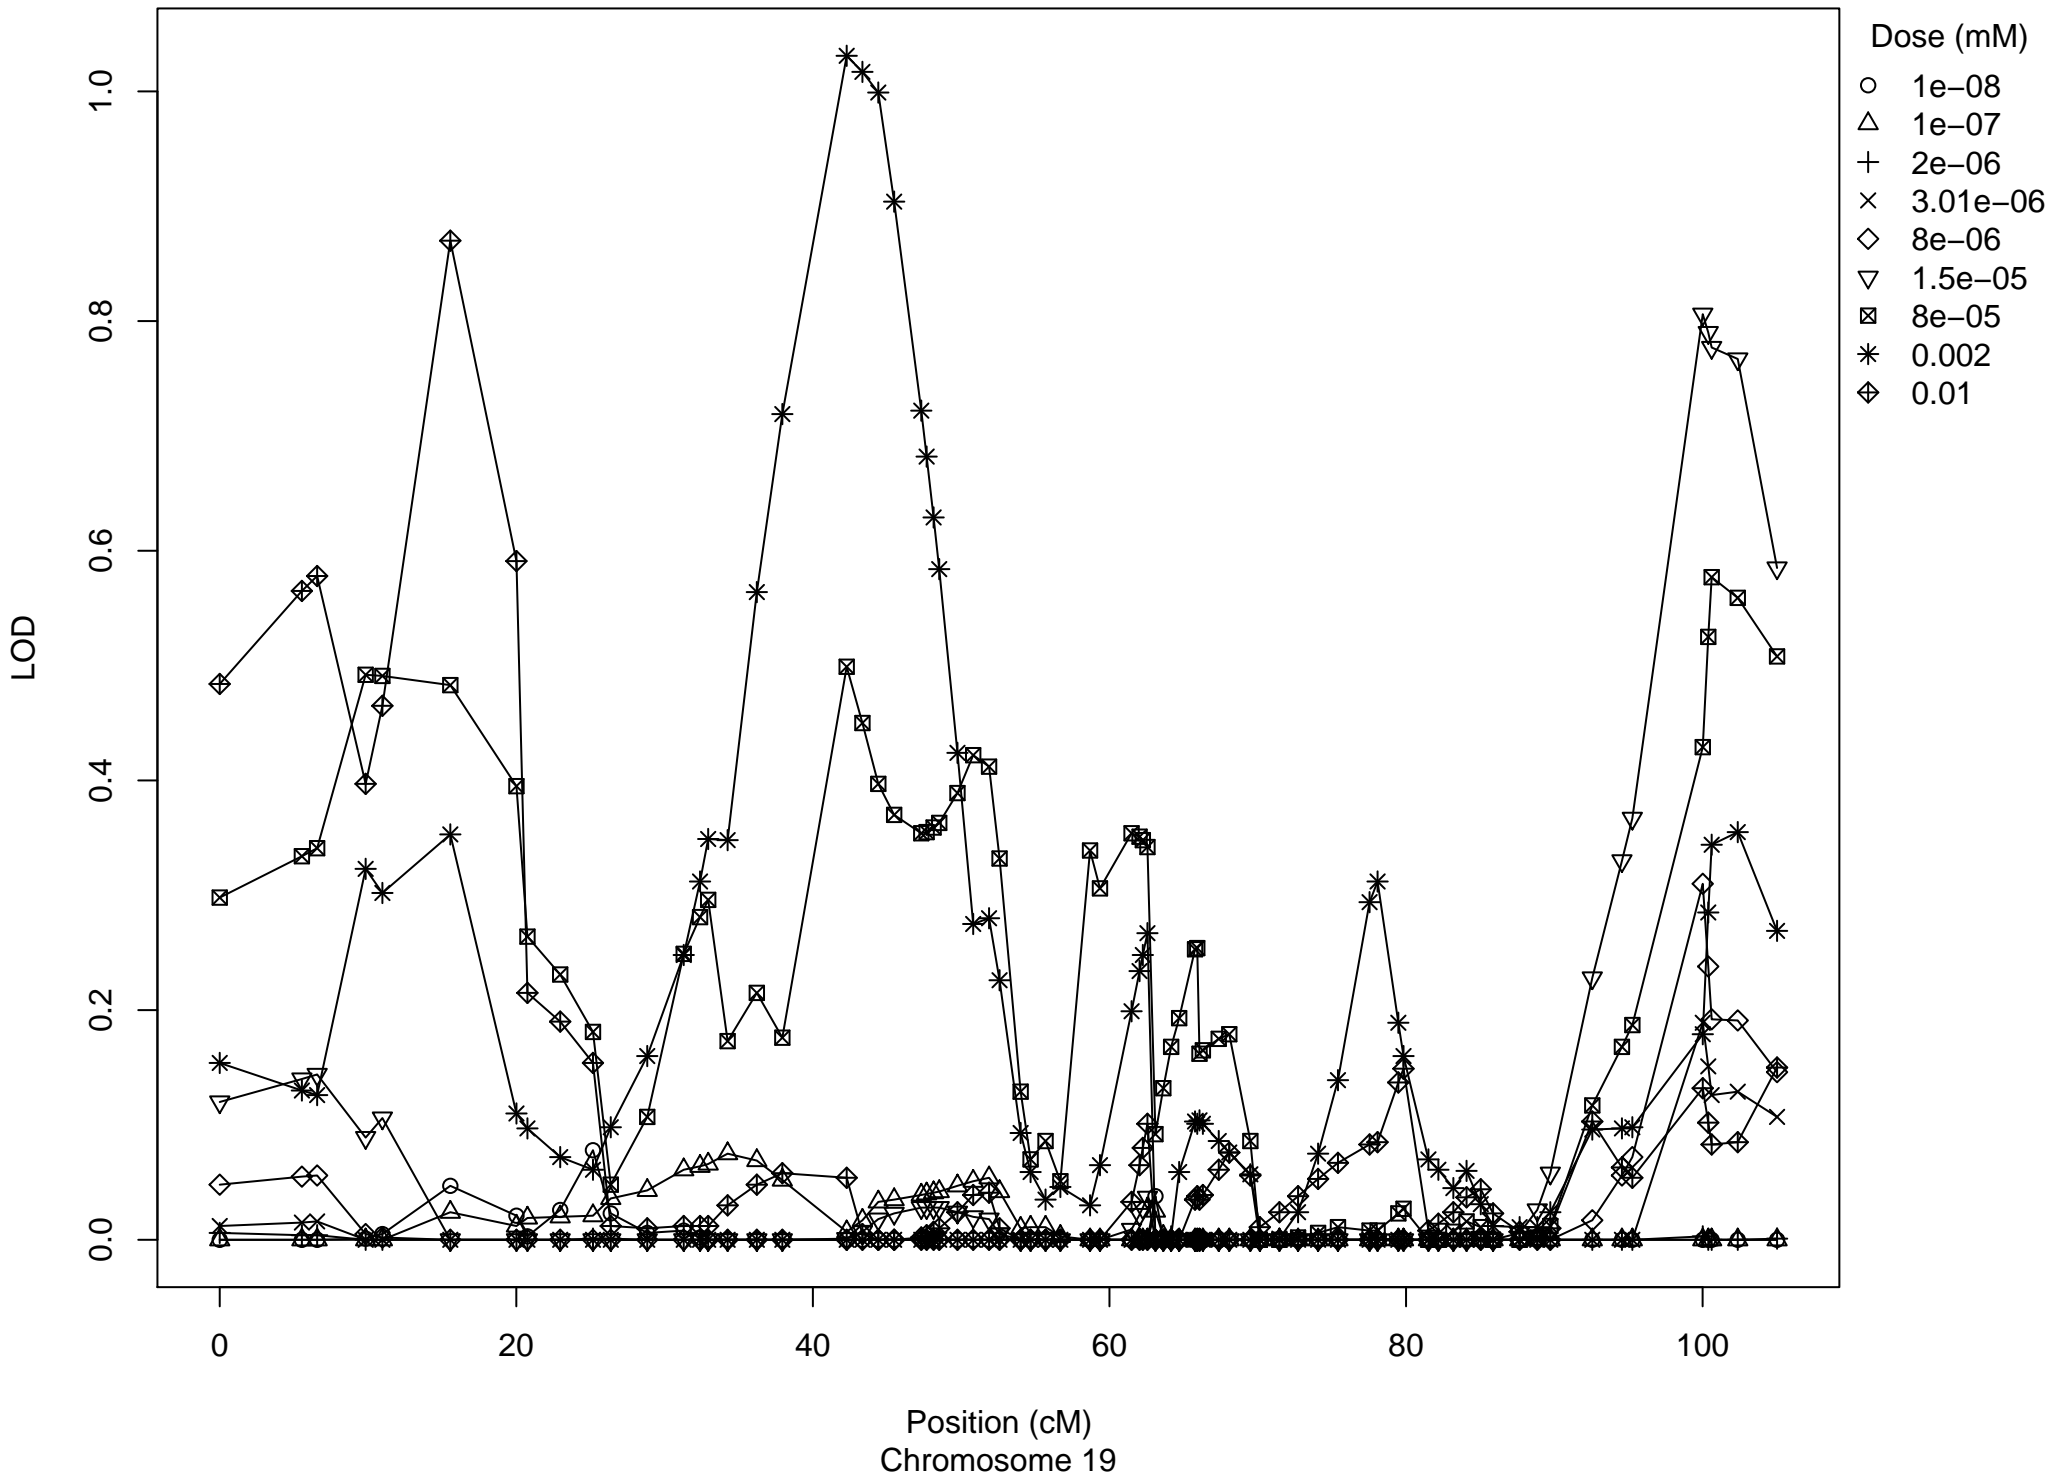

# Camptothecin (CPT)

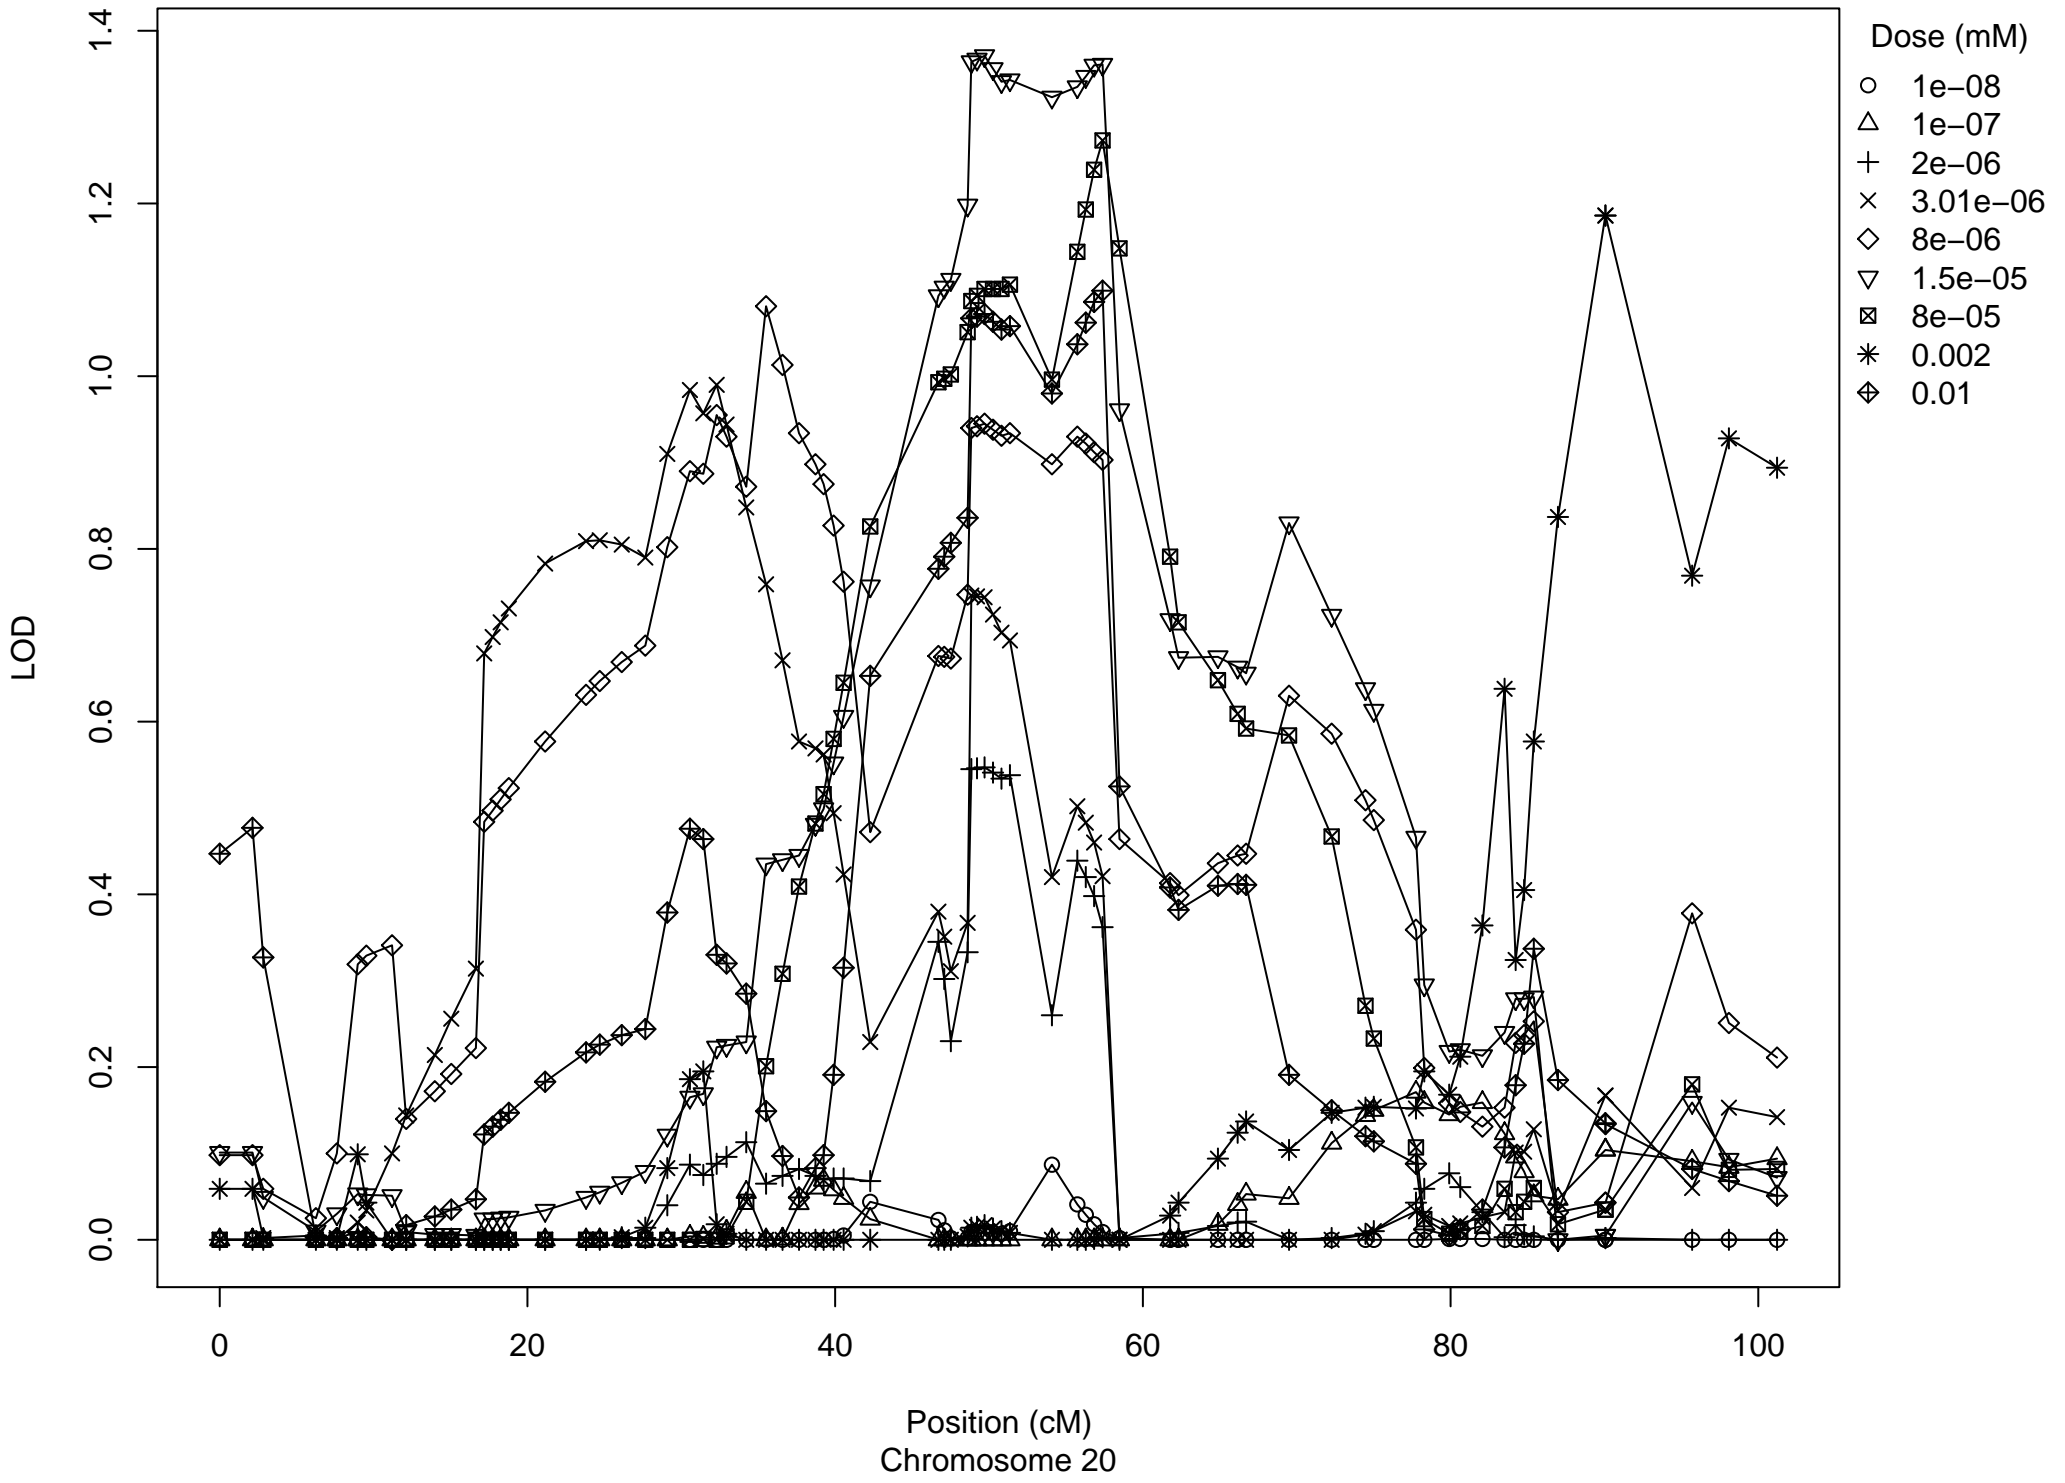

# Camptothecin (CPT)

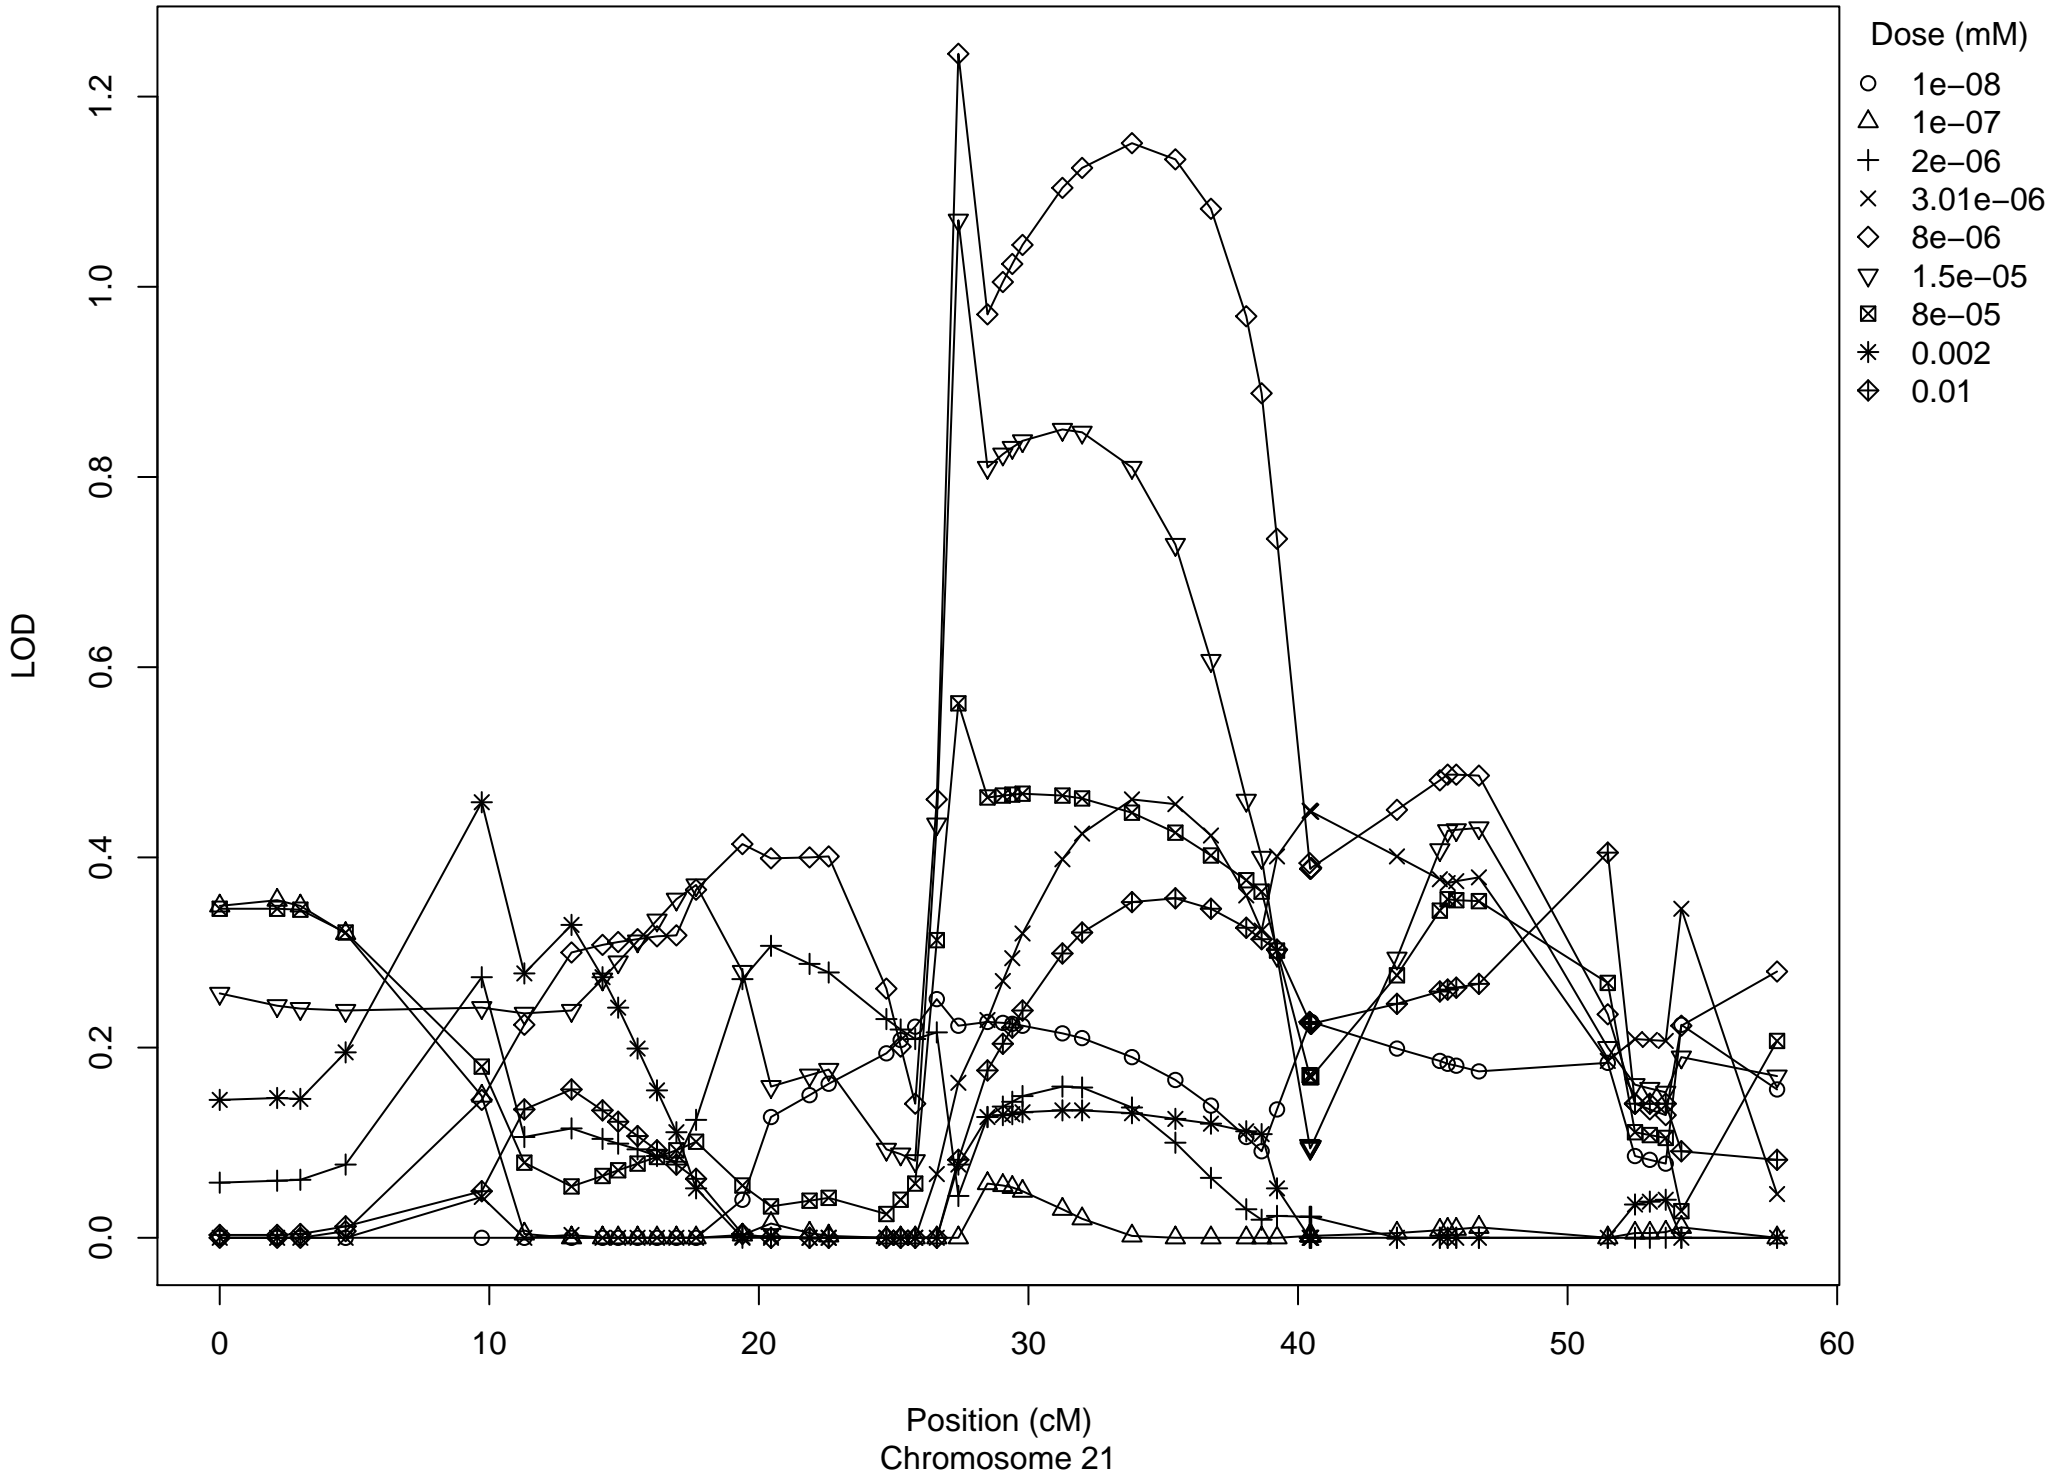

# Camptothecin (CPT)

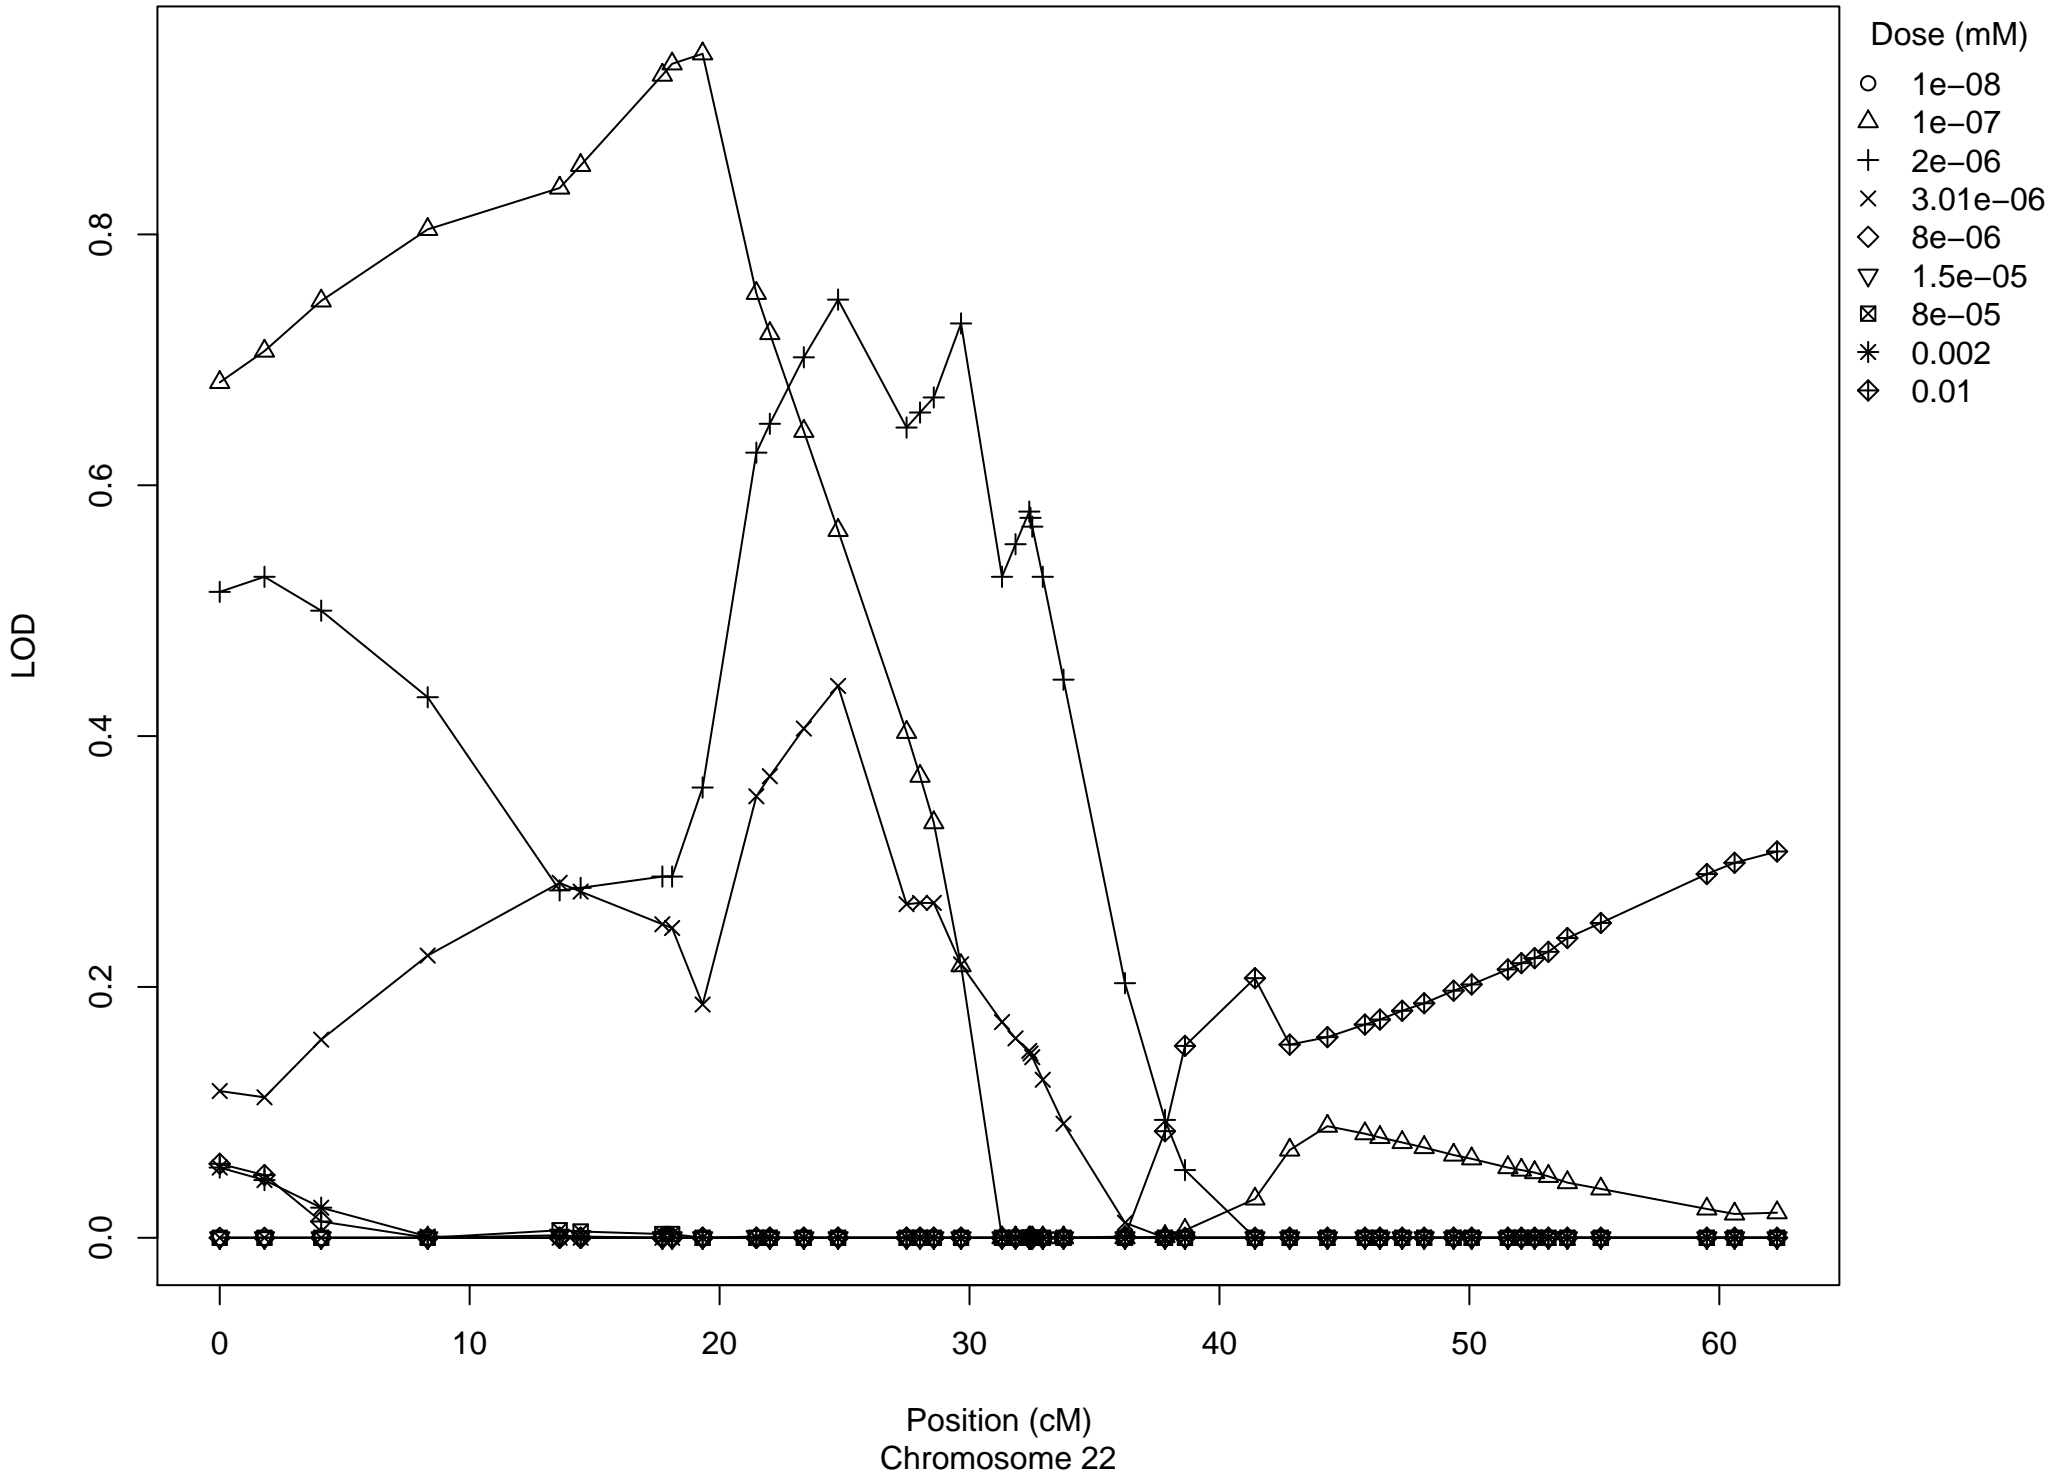



# Growth (1\_DMSO) (GR\_1\_DMSO)

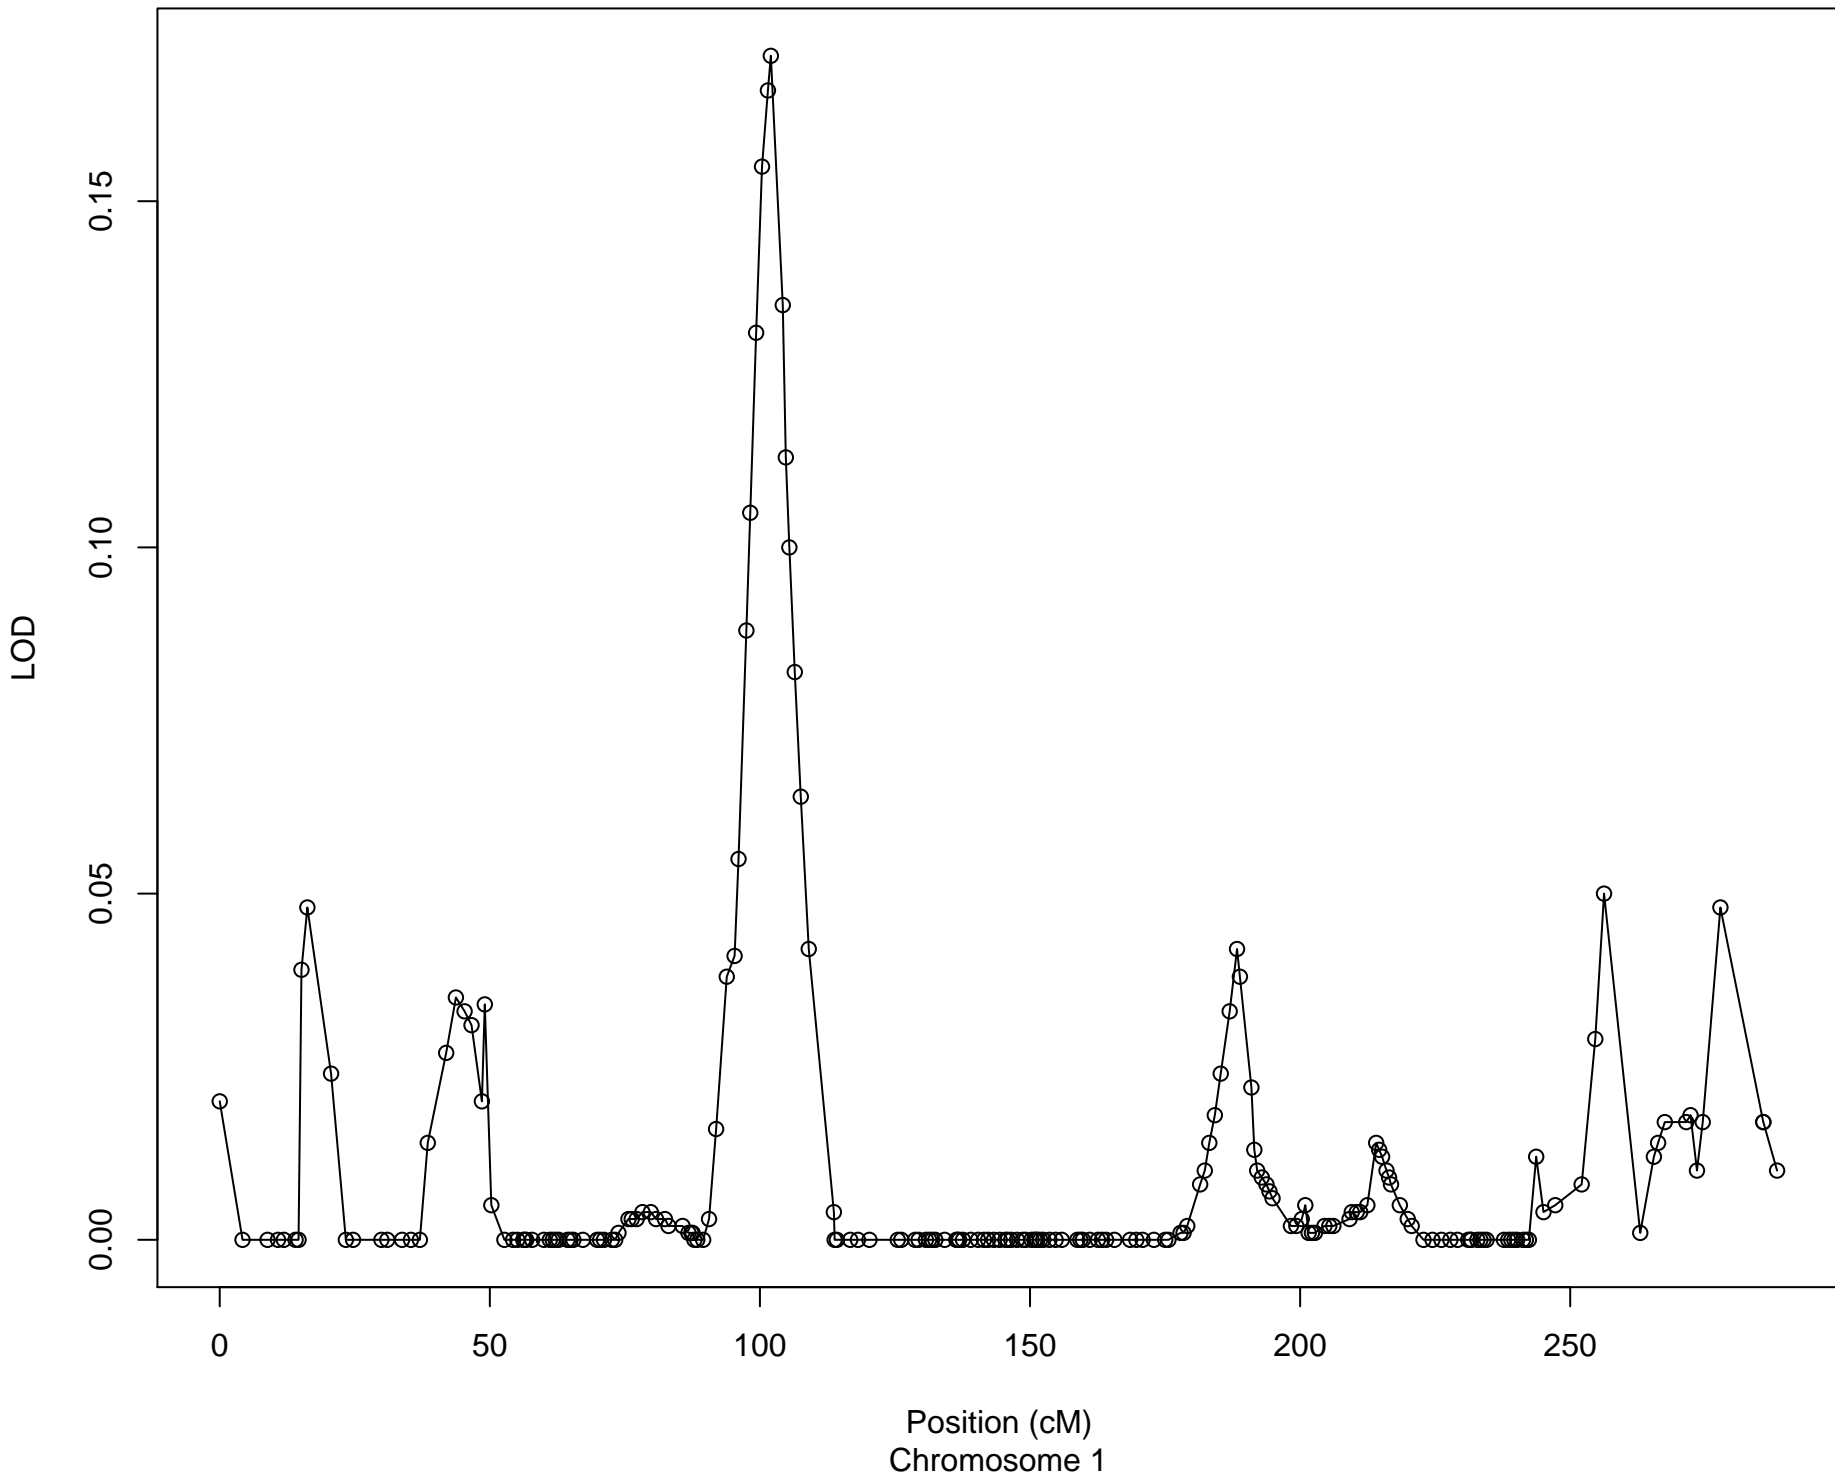

# Growth (1\_DMSO) (GR\_1\_DMSO)

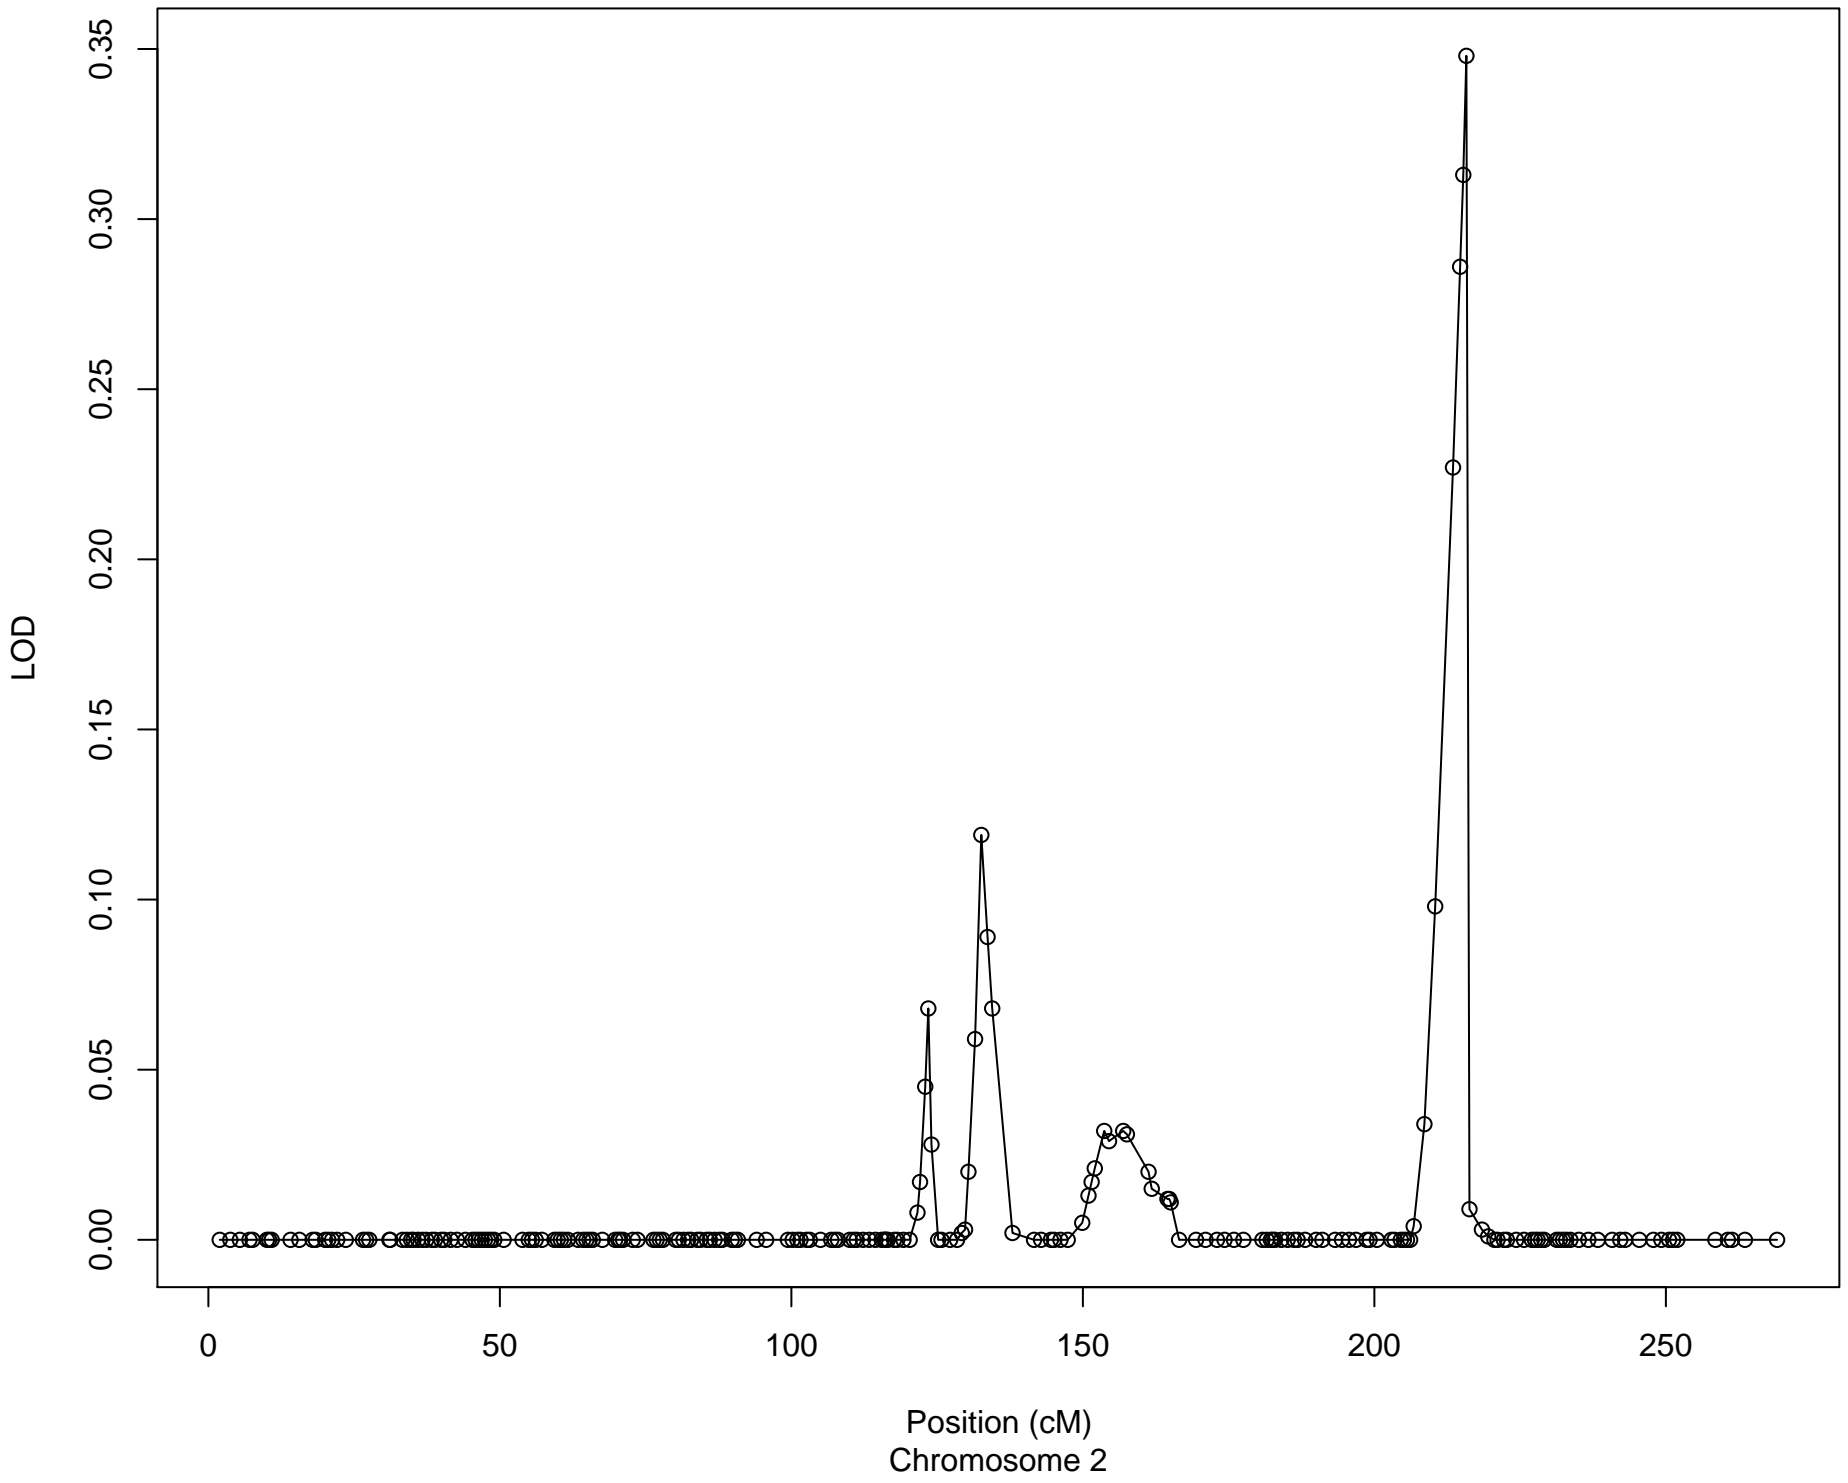

# Growth (1\_DMSO) (GR\_1\_DMSO)

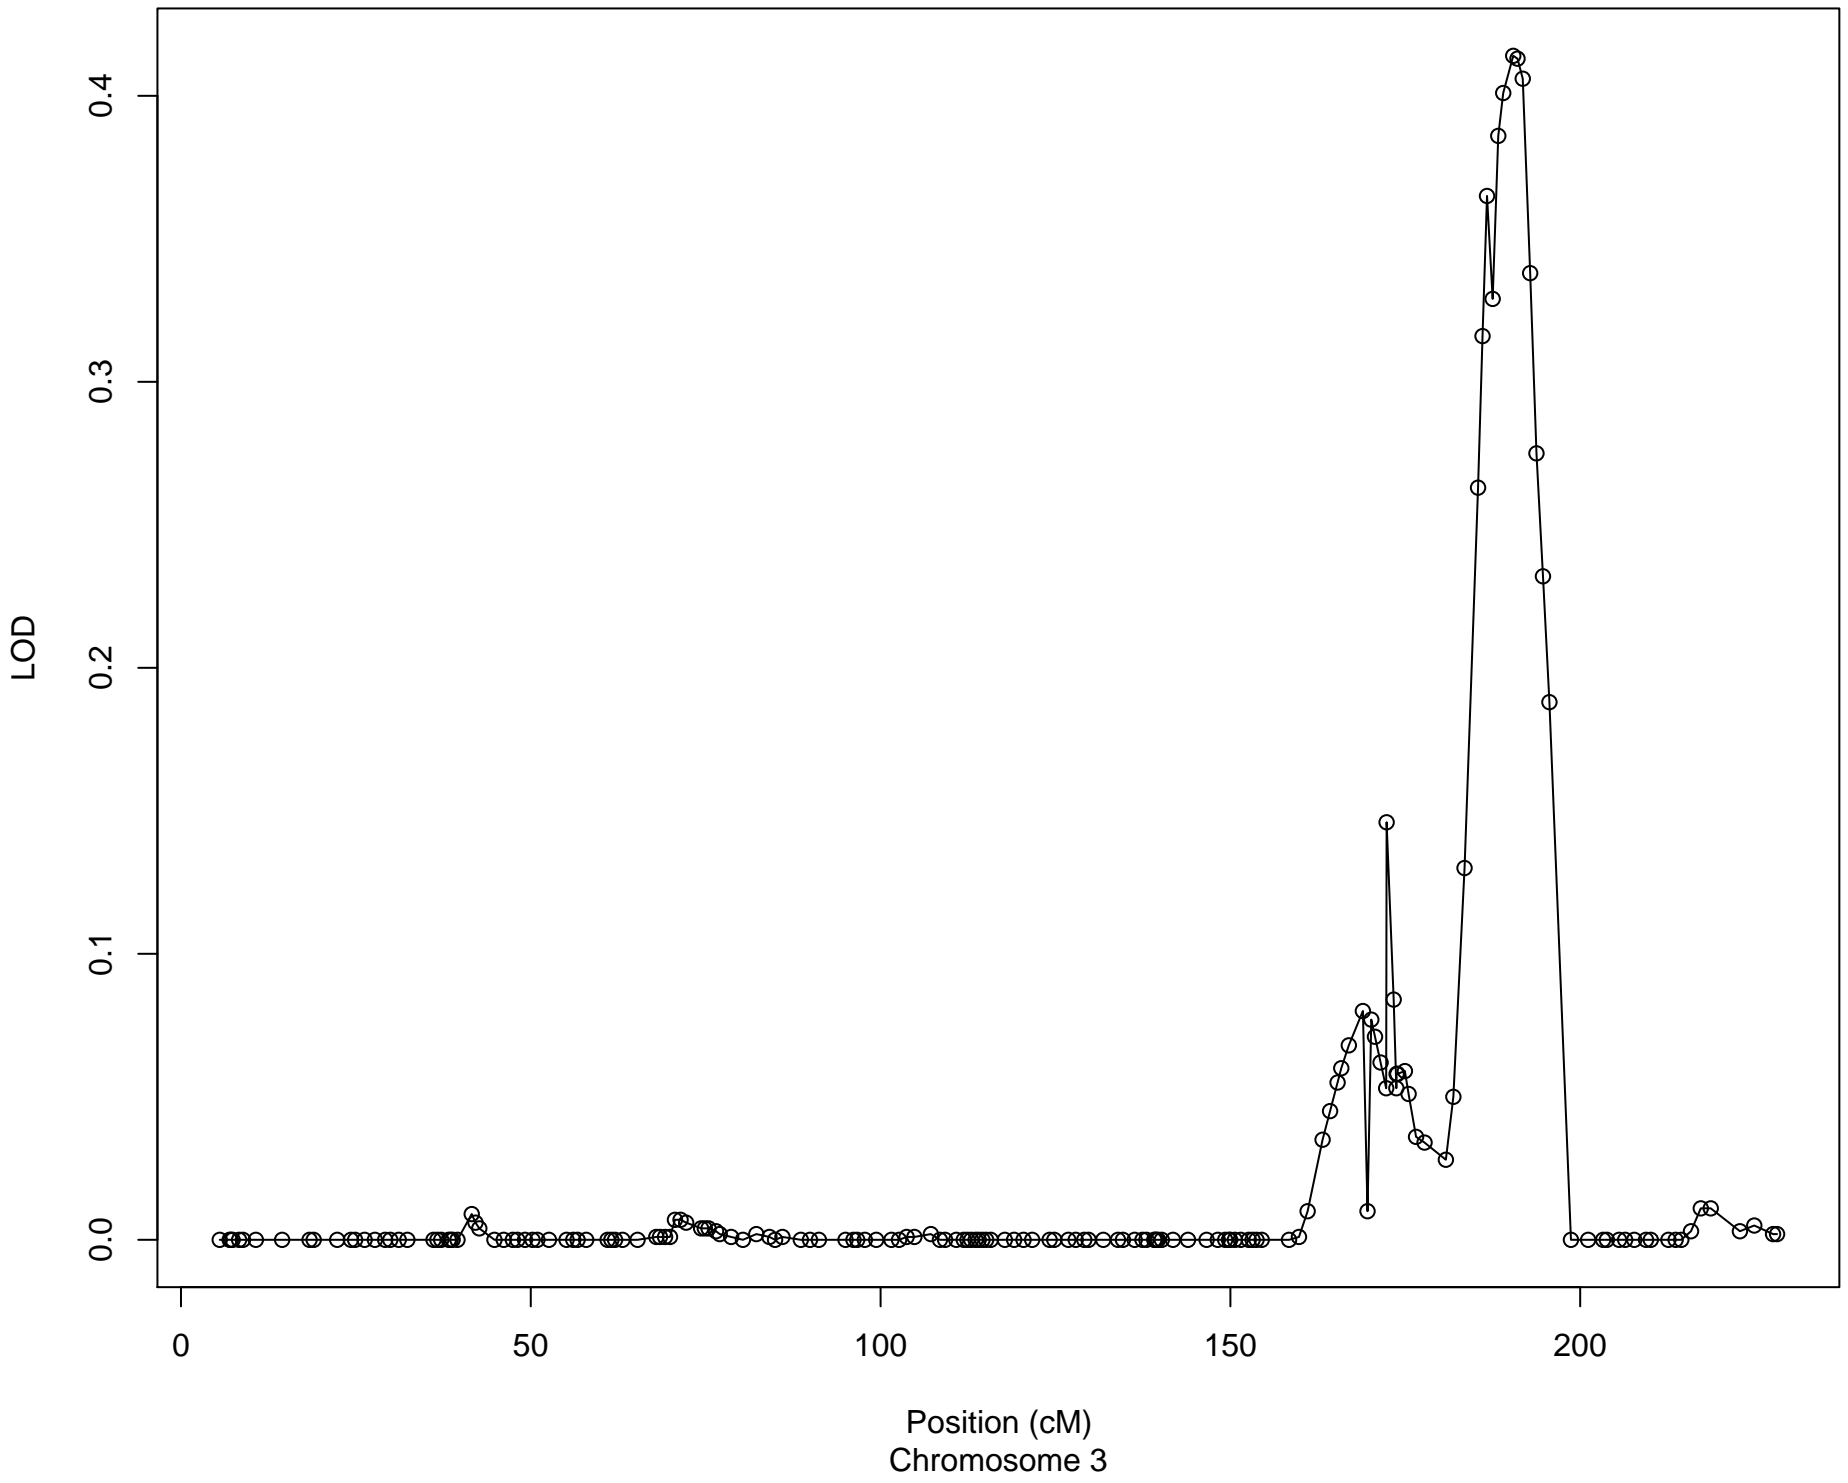

# Growth (1\_DMSO) (GR\_1\_DMSO)

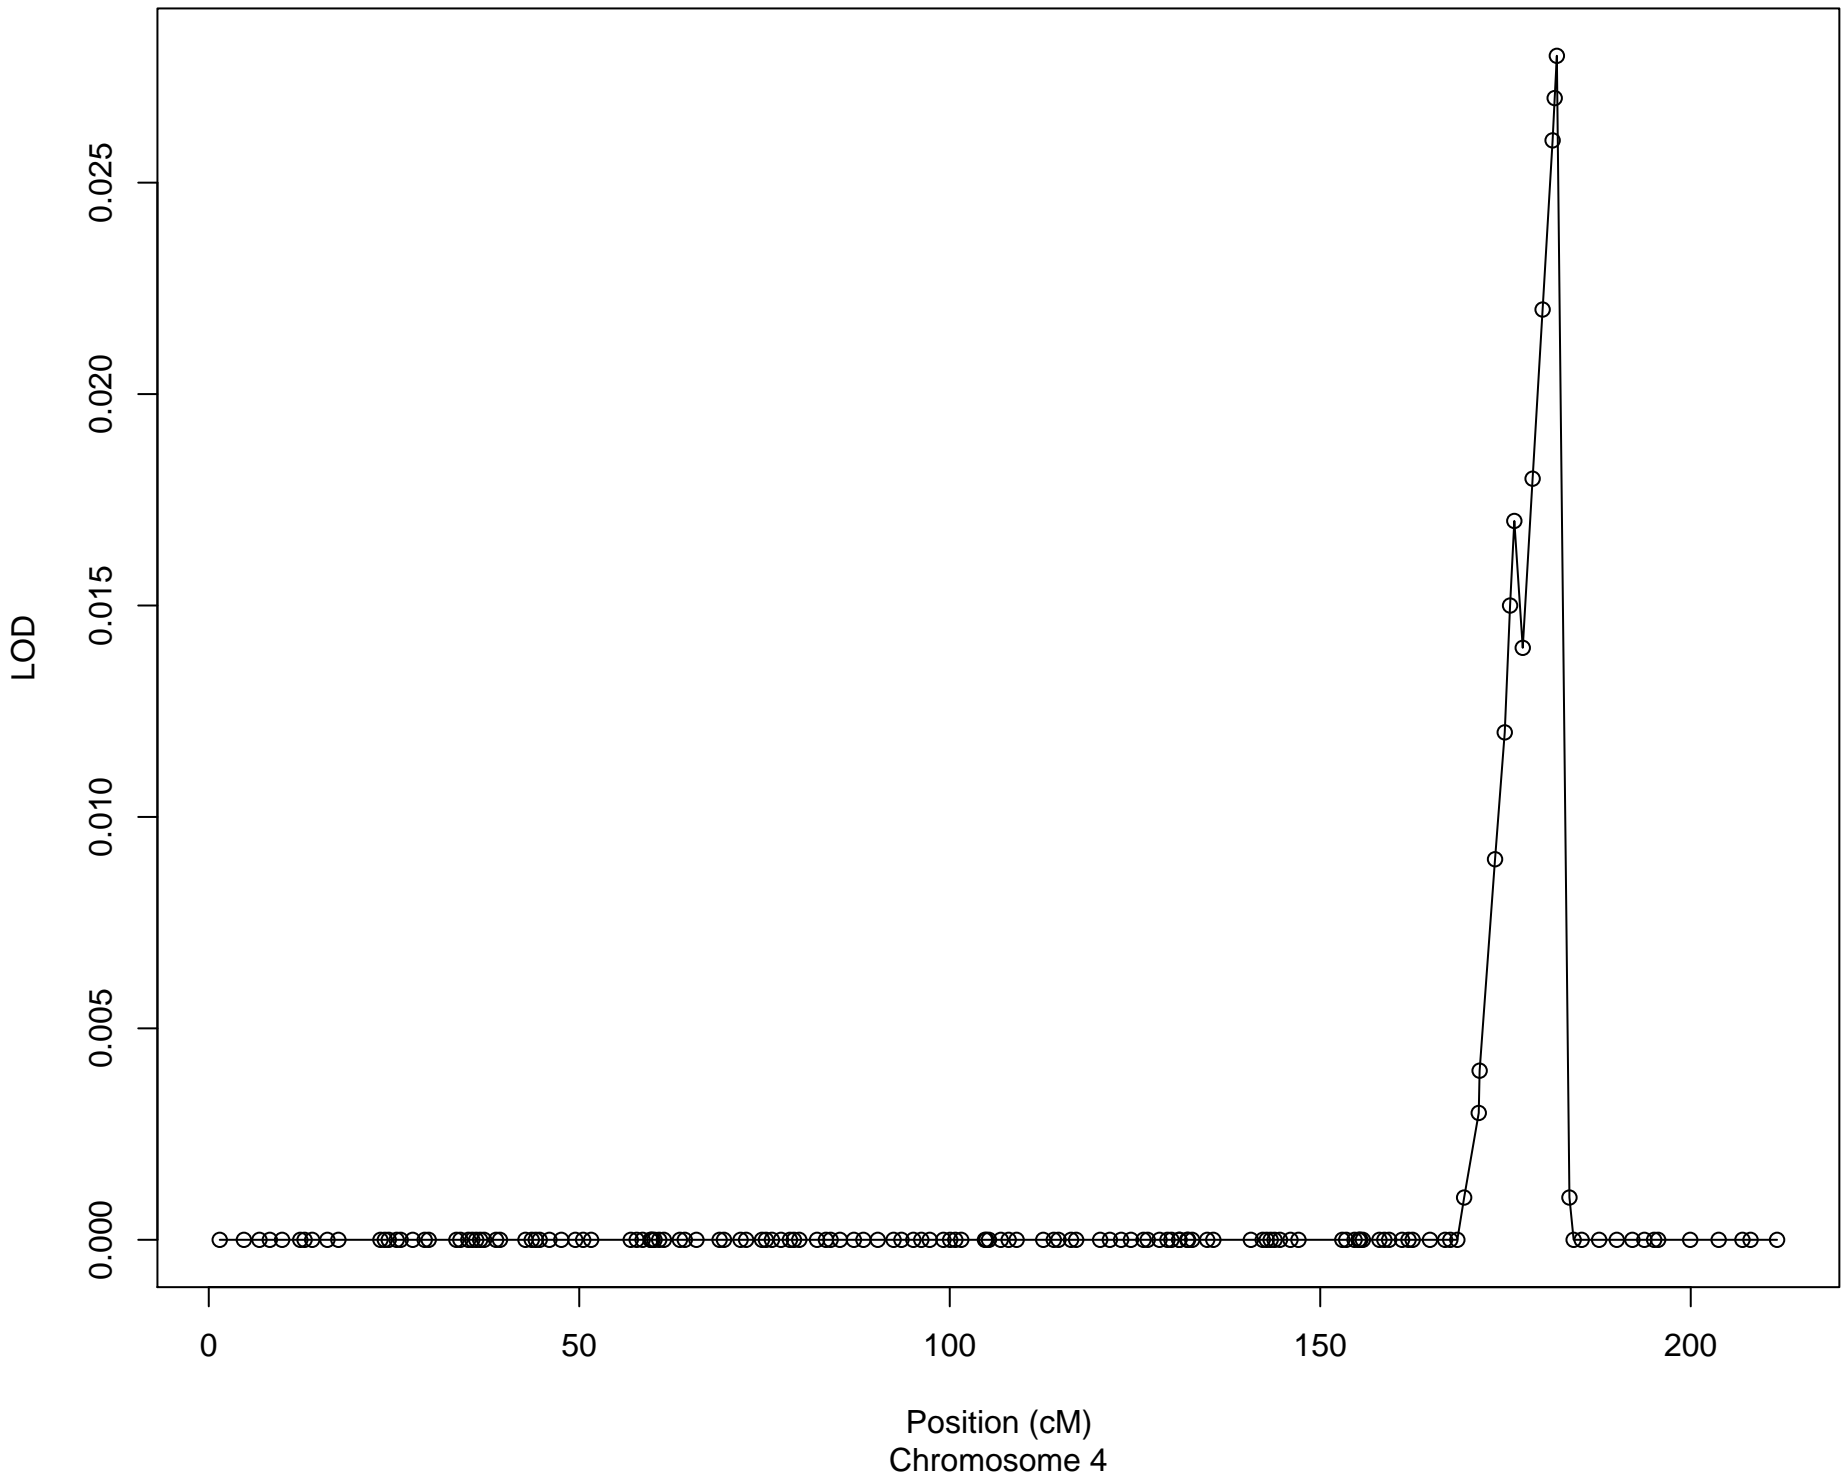

# Growth (1\_DMSO) (GR\_1\_DMSO)

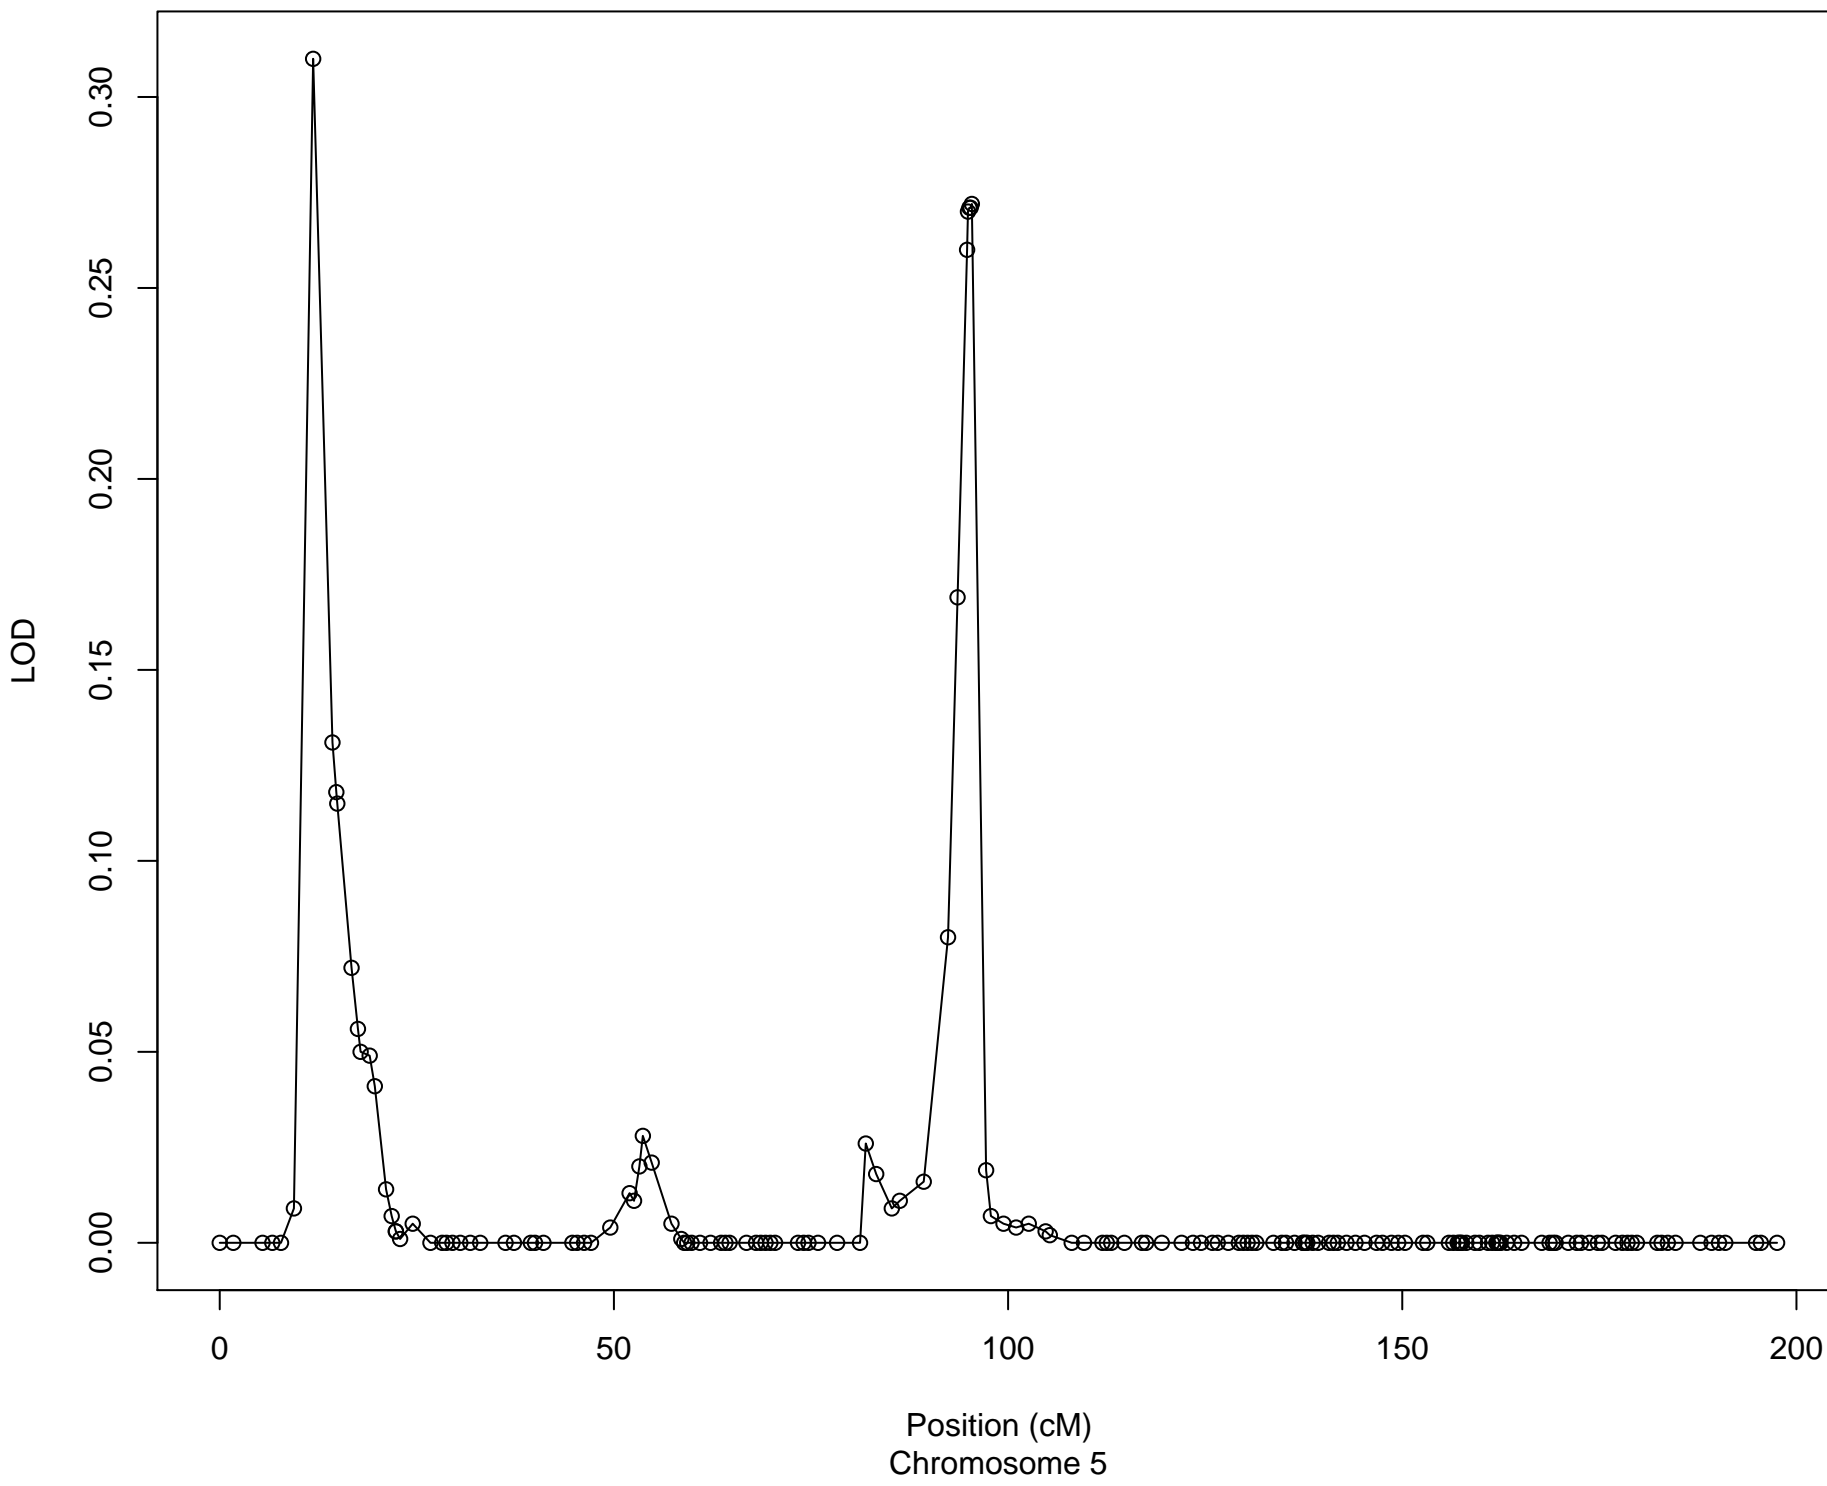

# Growth (1\_DMSO) (GR\_1\_DMSO)

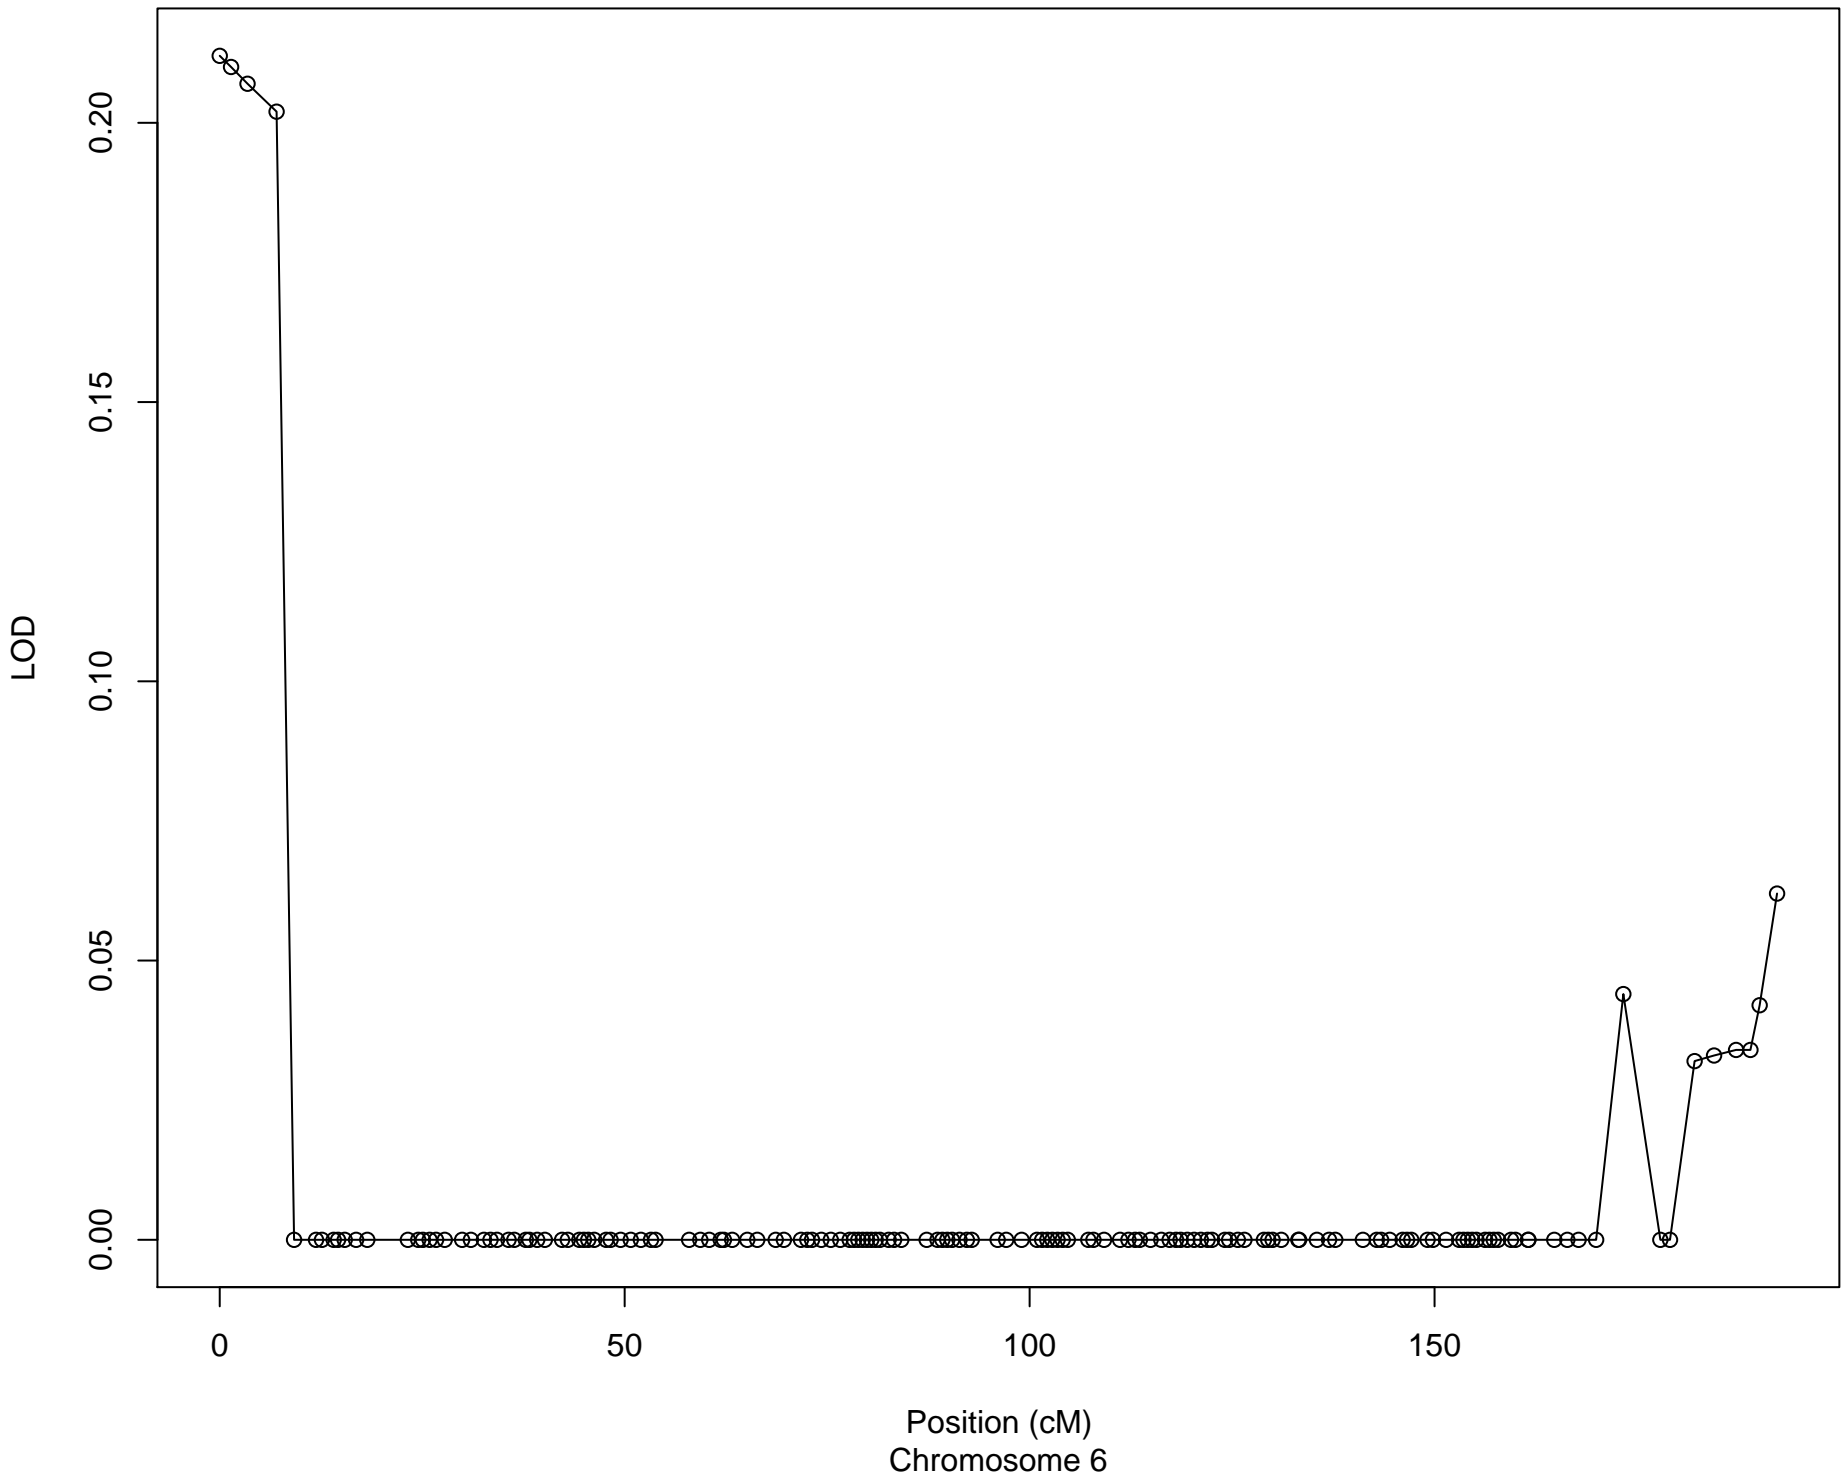

# Growth (1\_DMSO) (GR\_1\_DMSO)

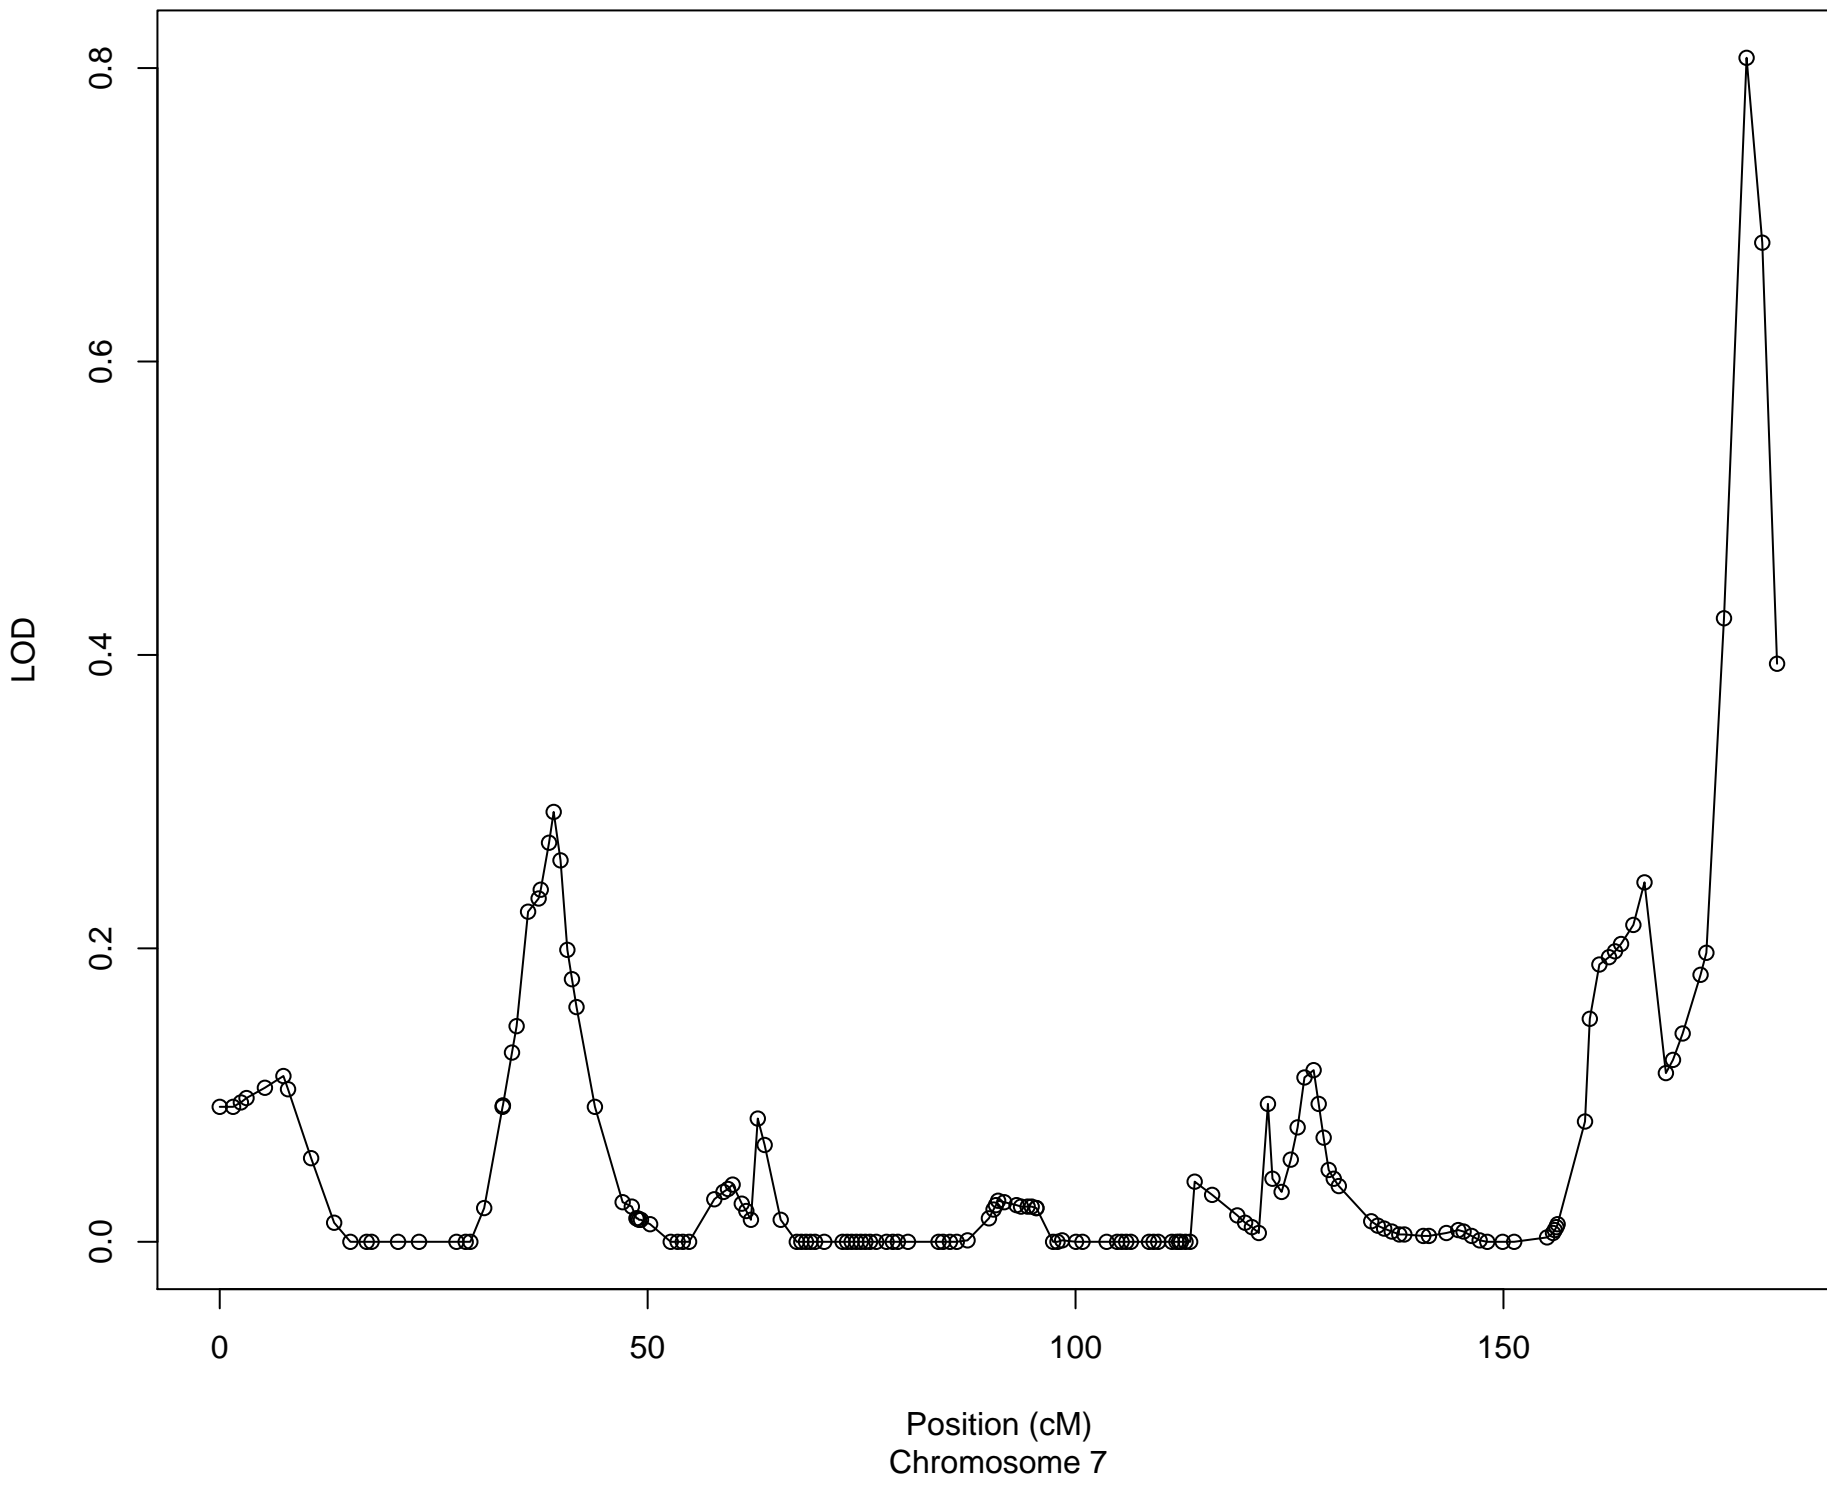

# Growth (1\_DMSO) (GR\_1\_DMSO)

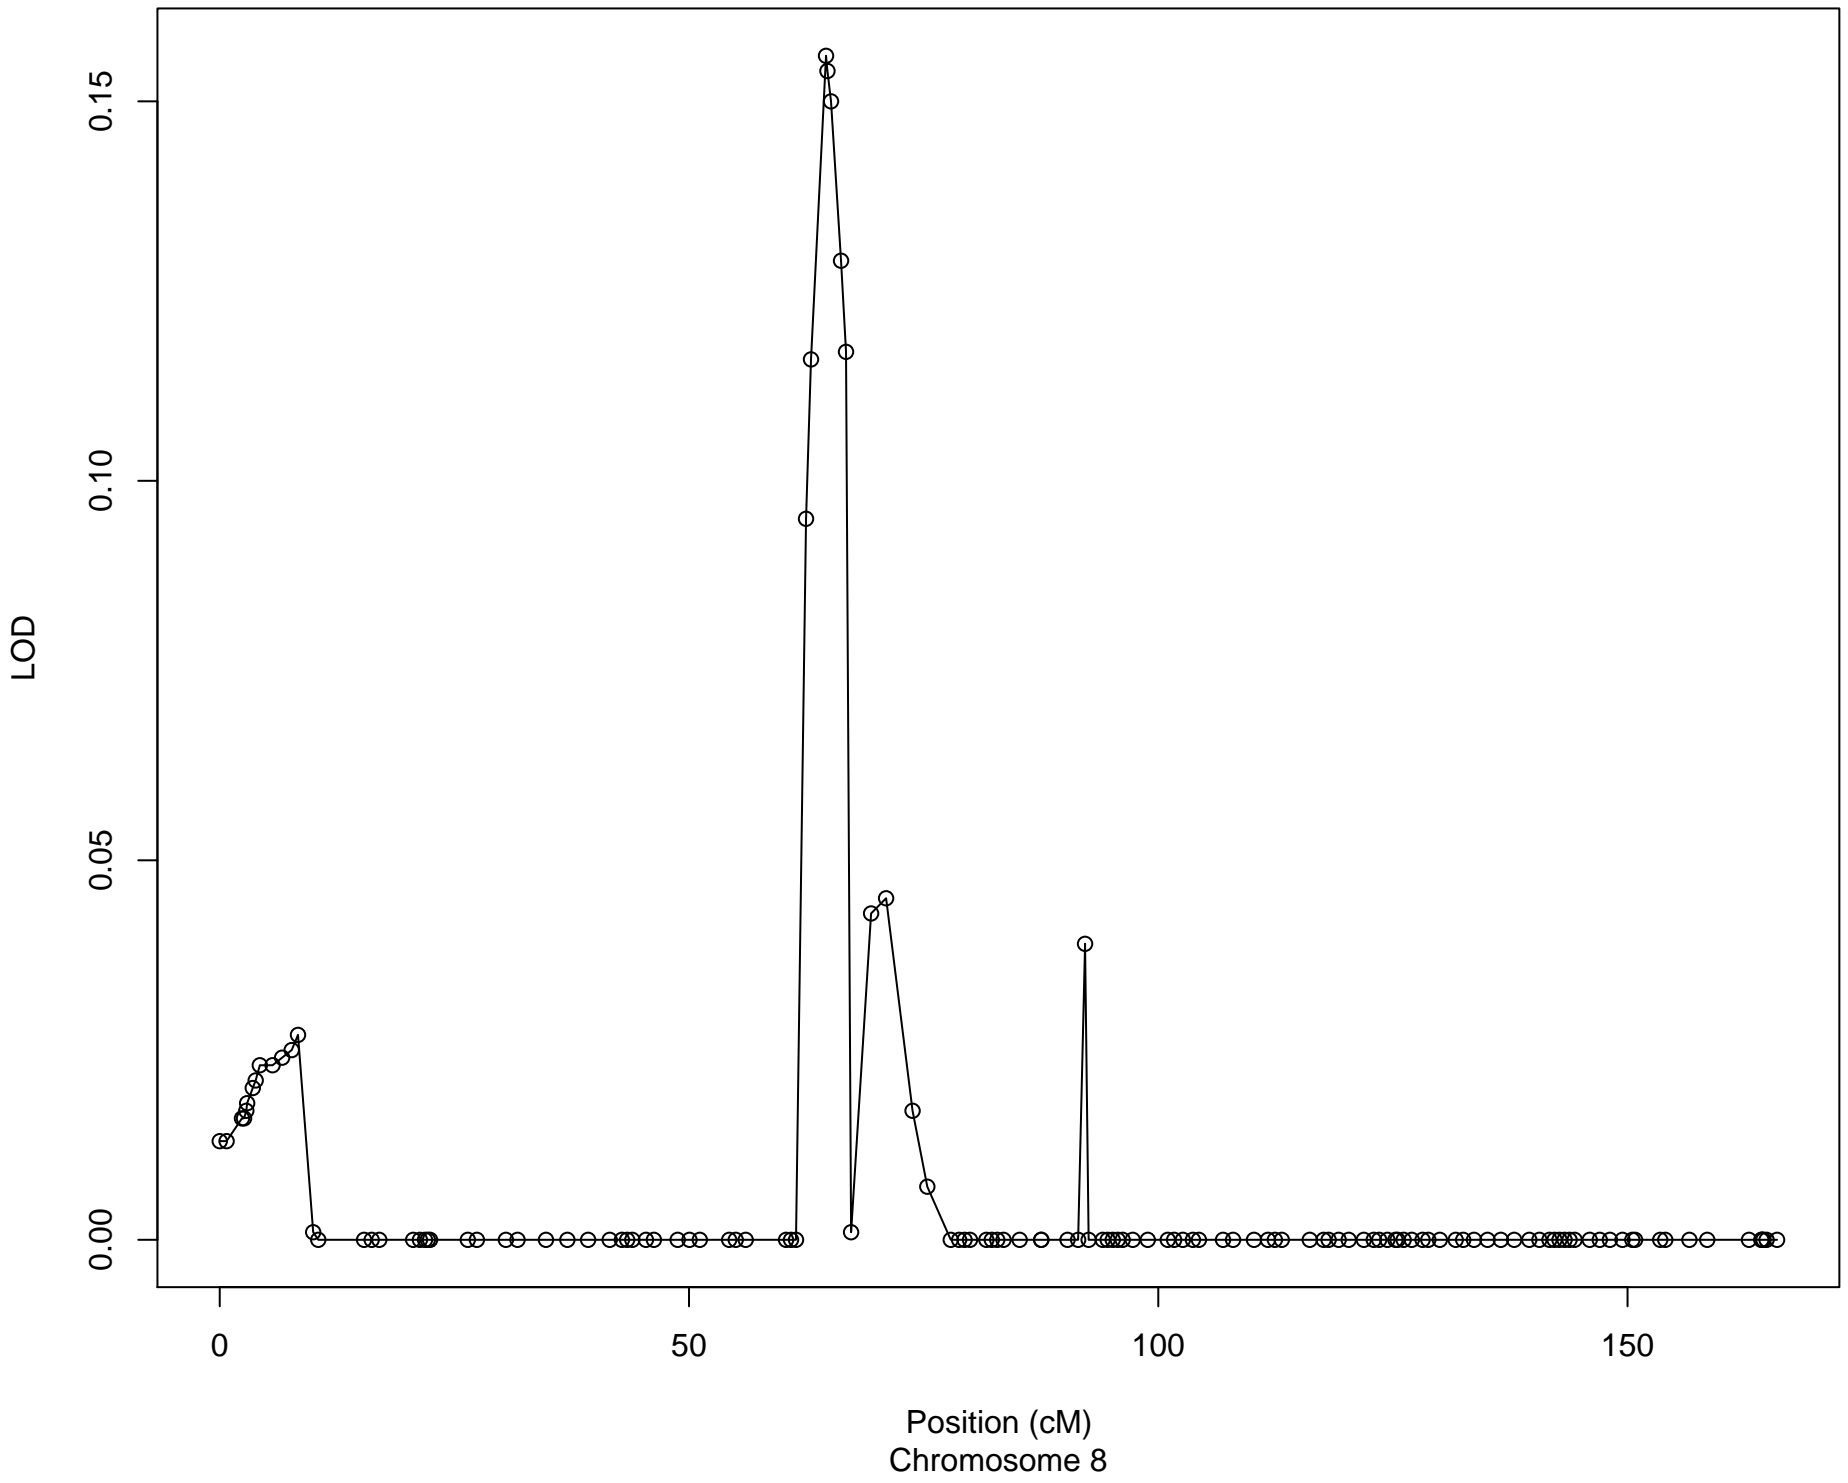



# Growth (1\_DMSO) (GR\_1\_DMSO)

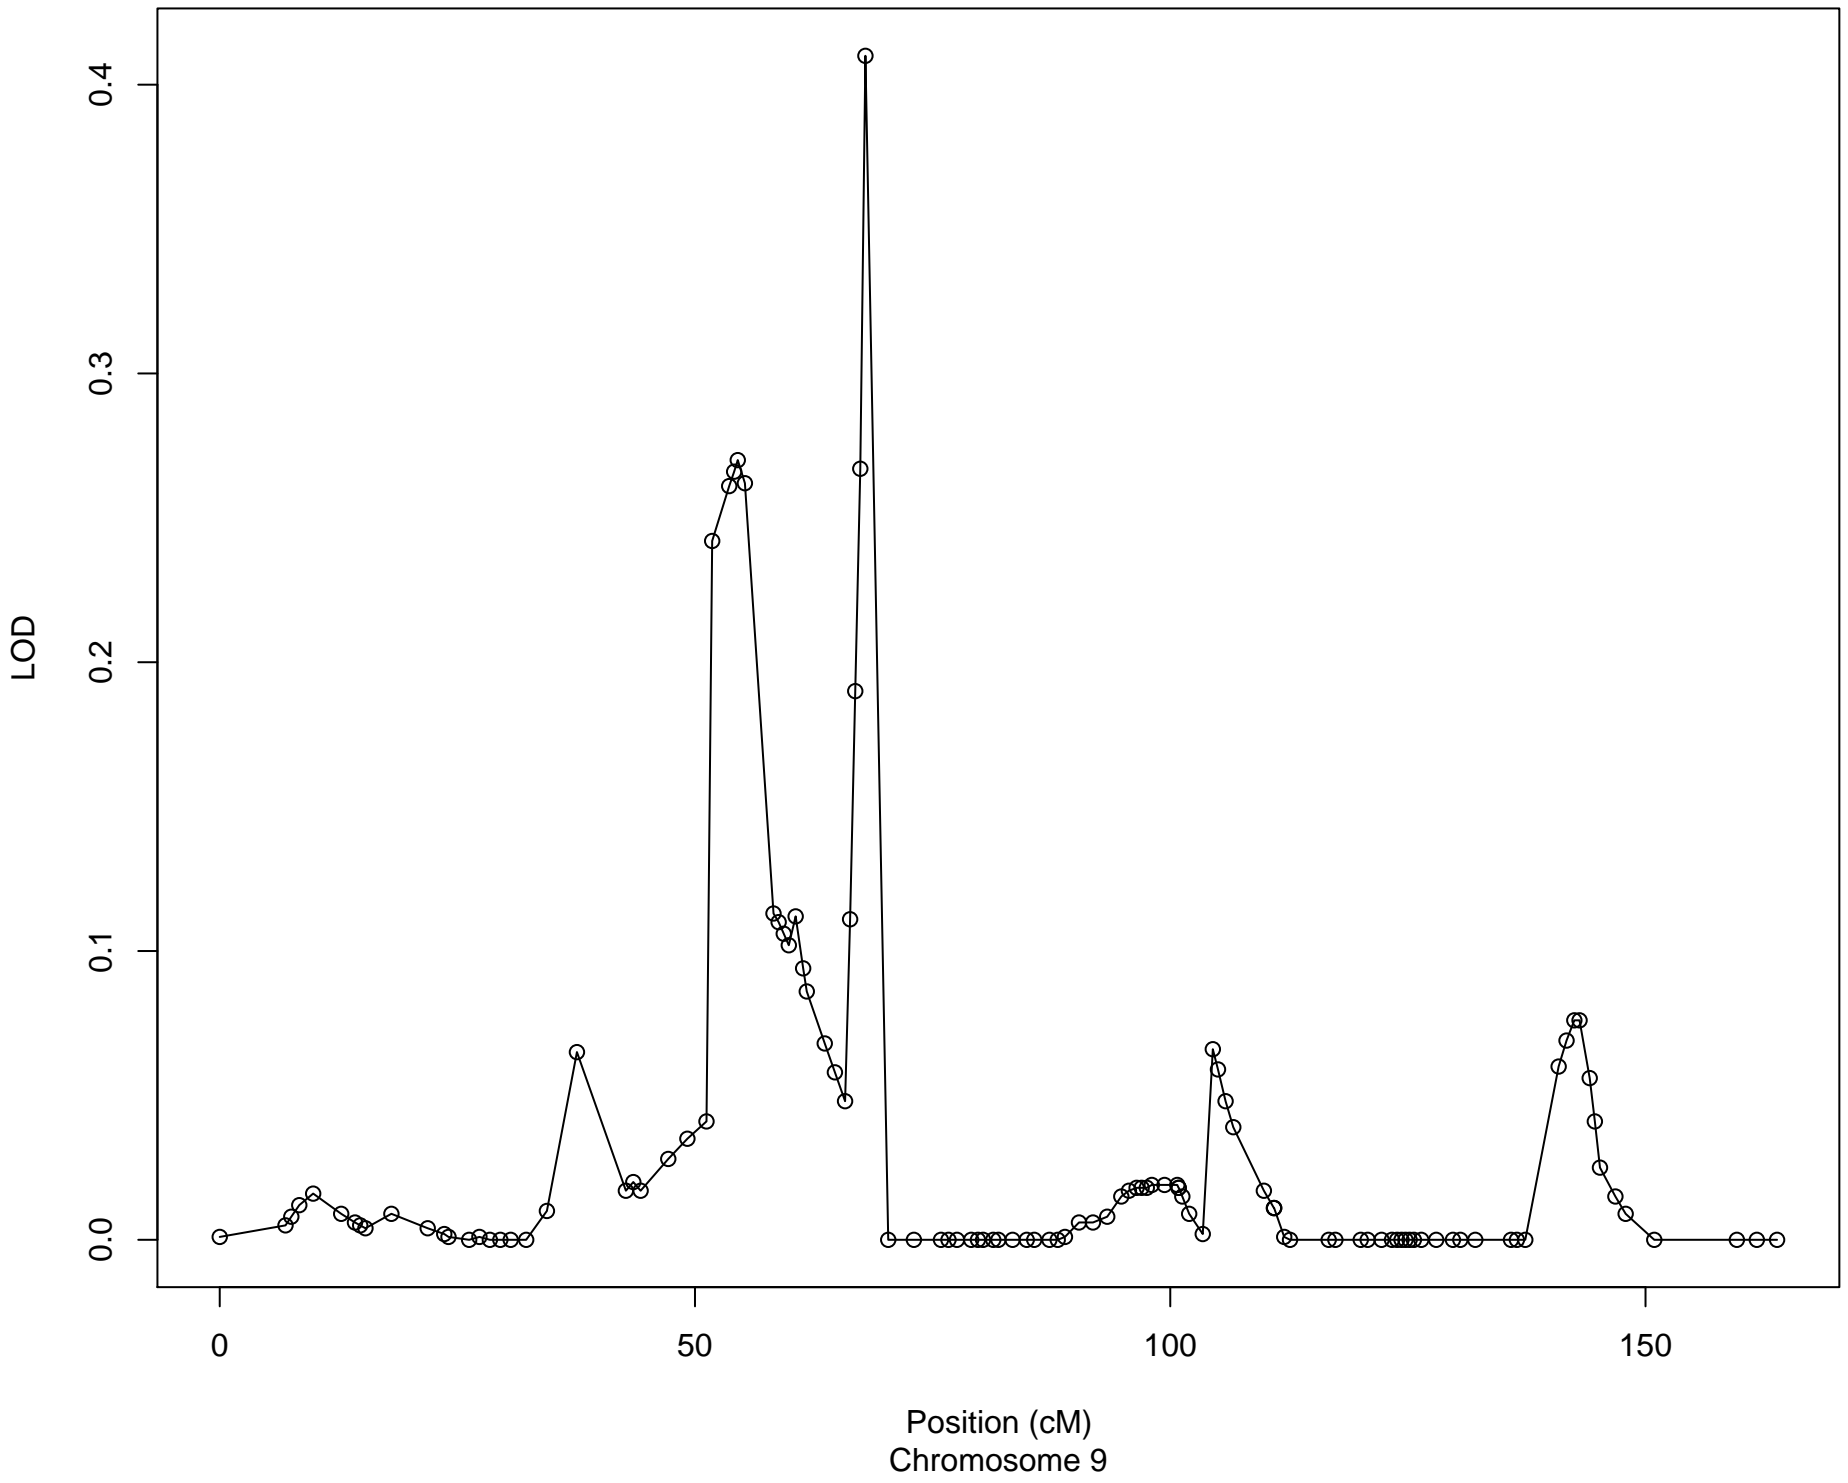

# Growth (1\_DMSO) (GR\_1\_DMSO)

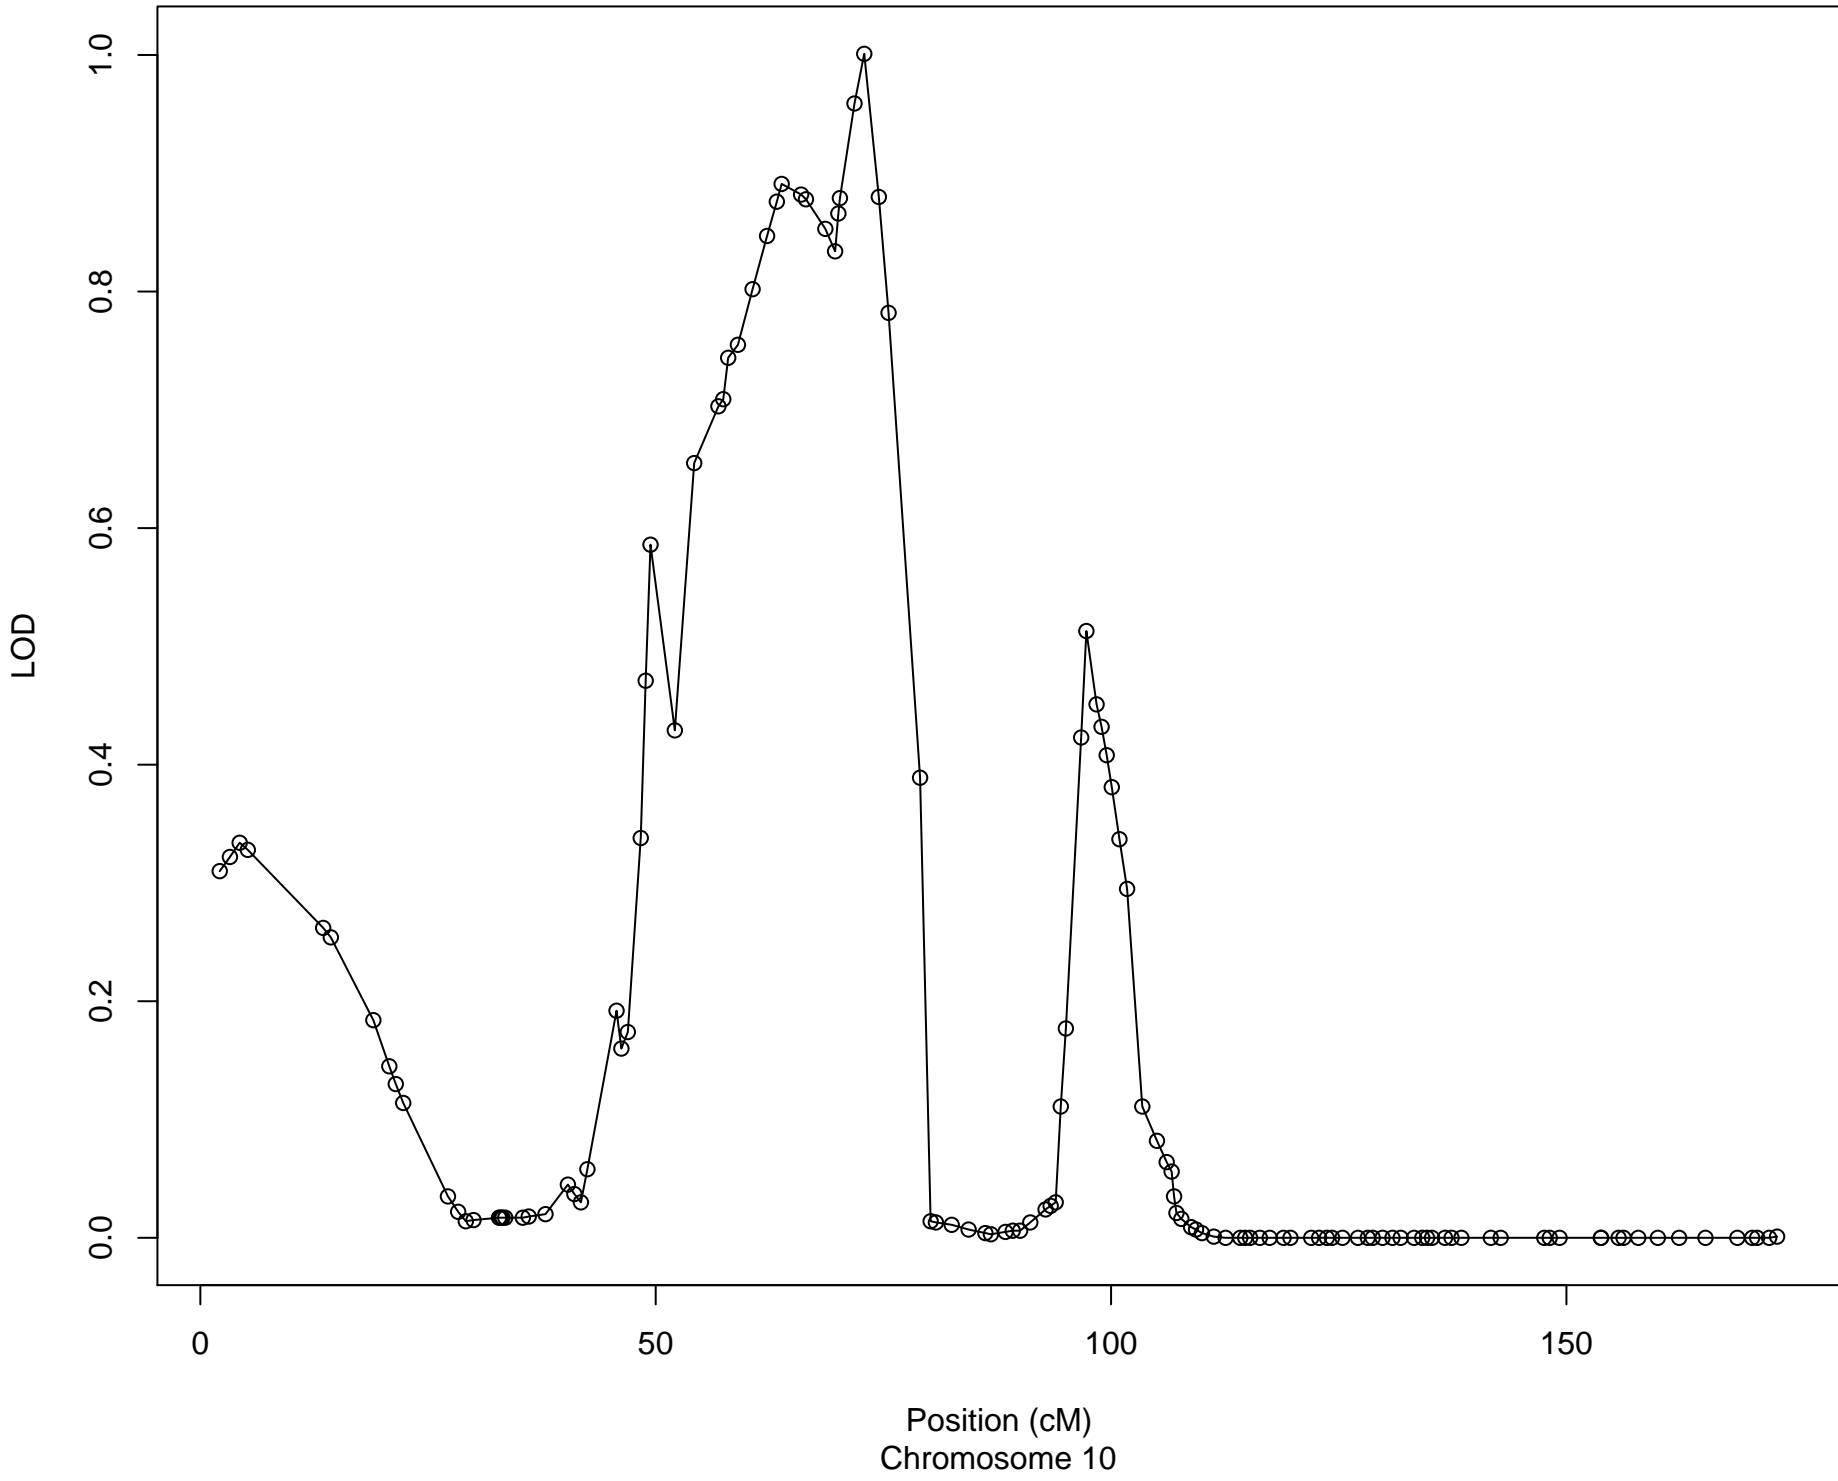

Growth (1\_DMSO) (GR\_1\_DMSO)

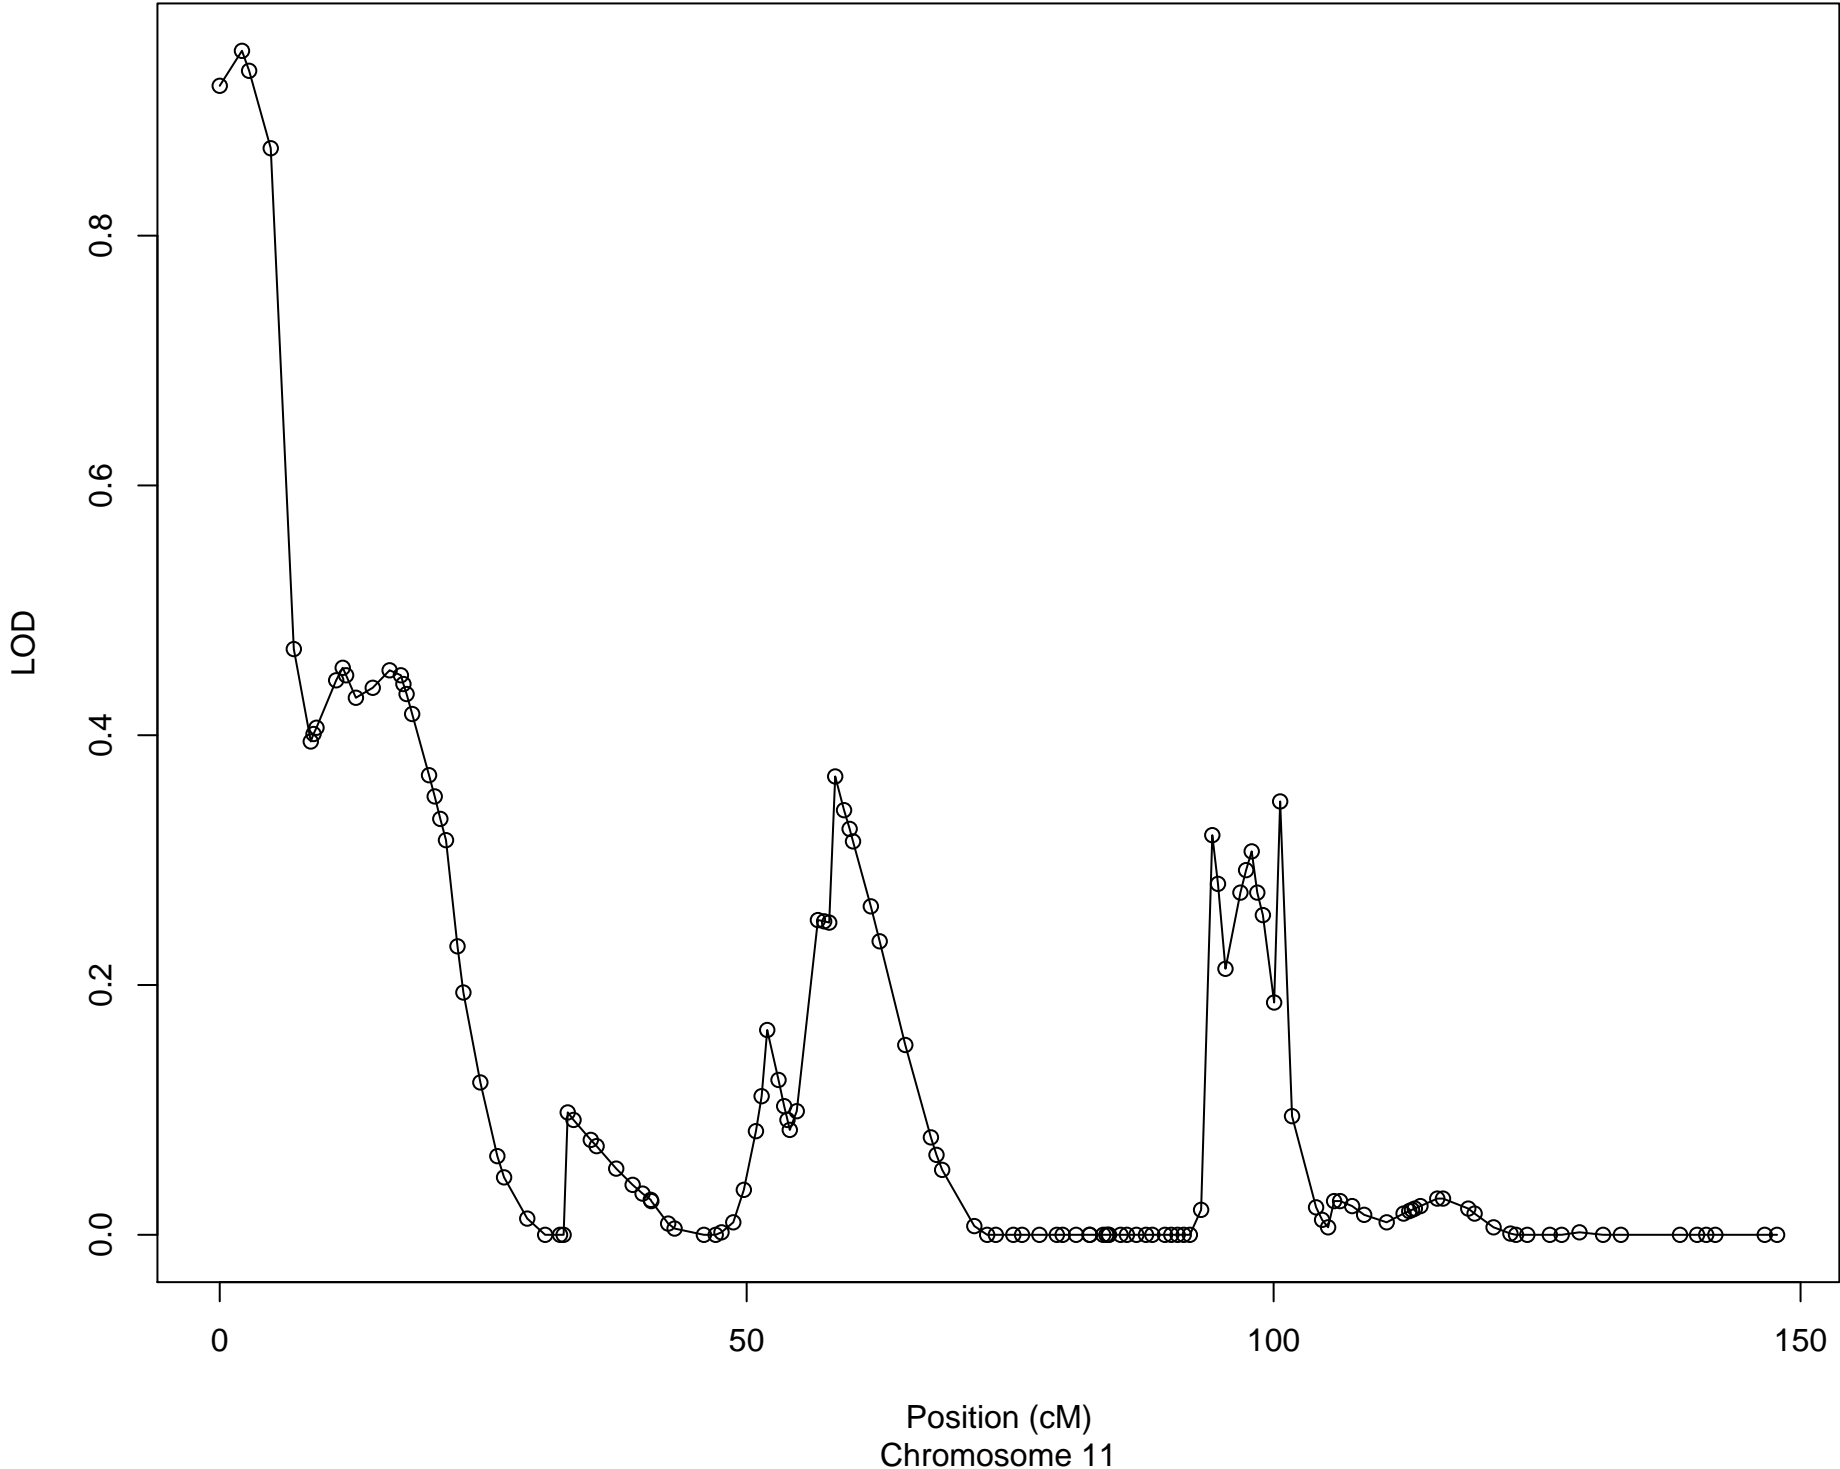

# Growth (1\_DMSO) (GR\_1\_DMSO)

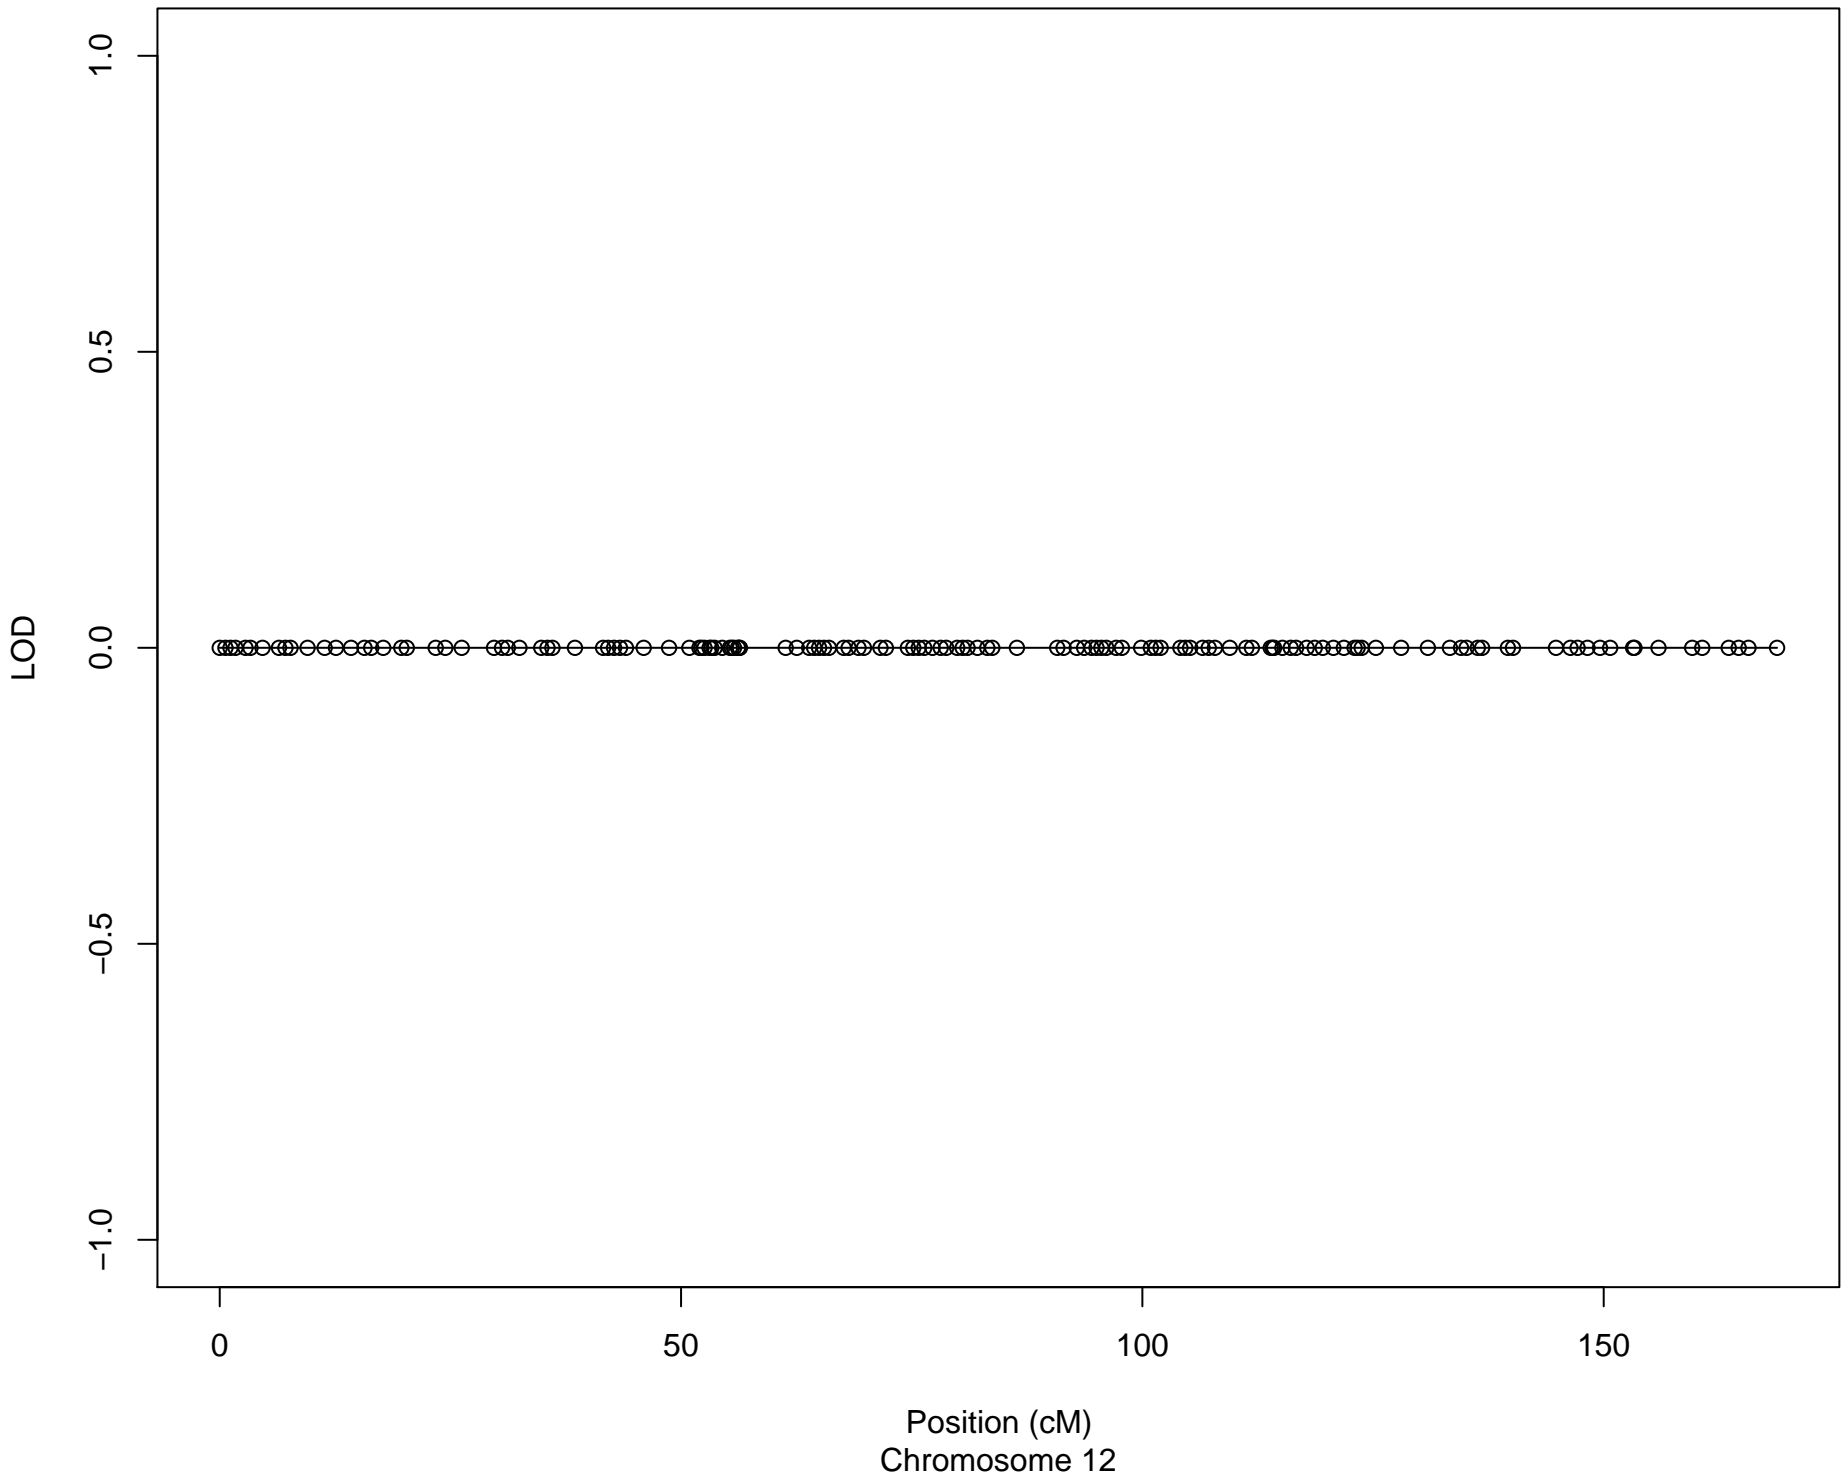

Growth (1\_DMSO) (GR\_1\_DMSO)

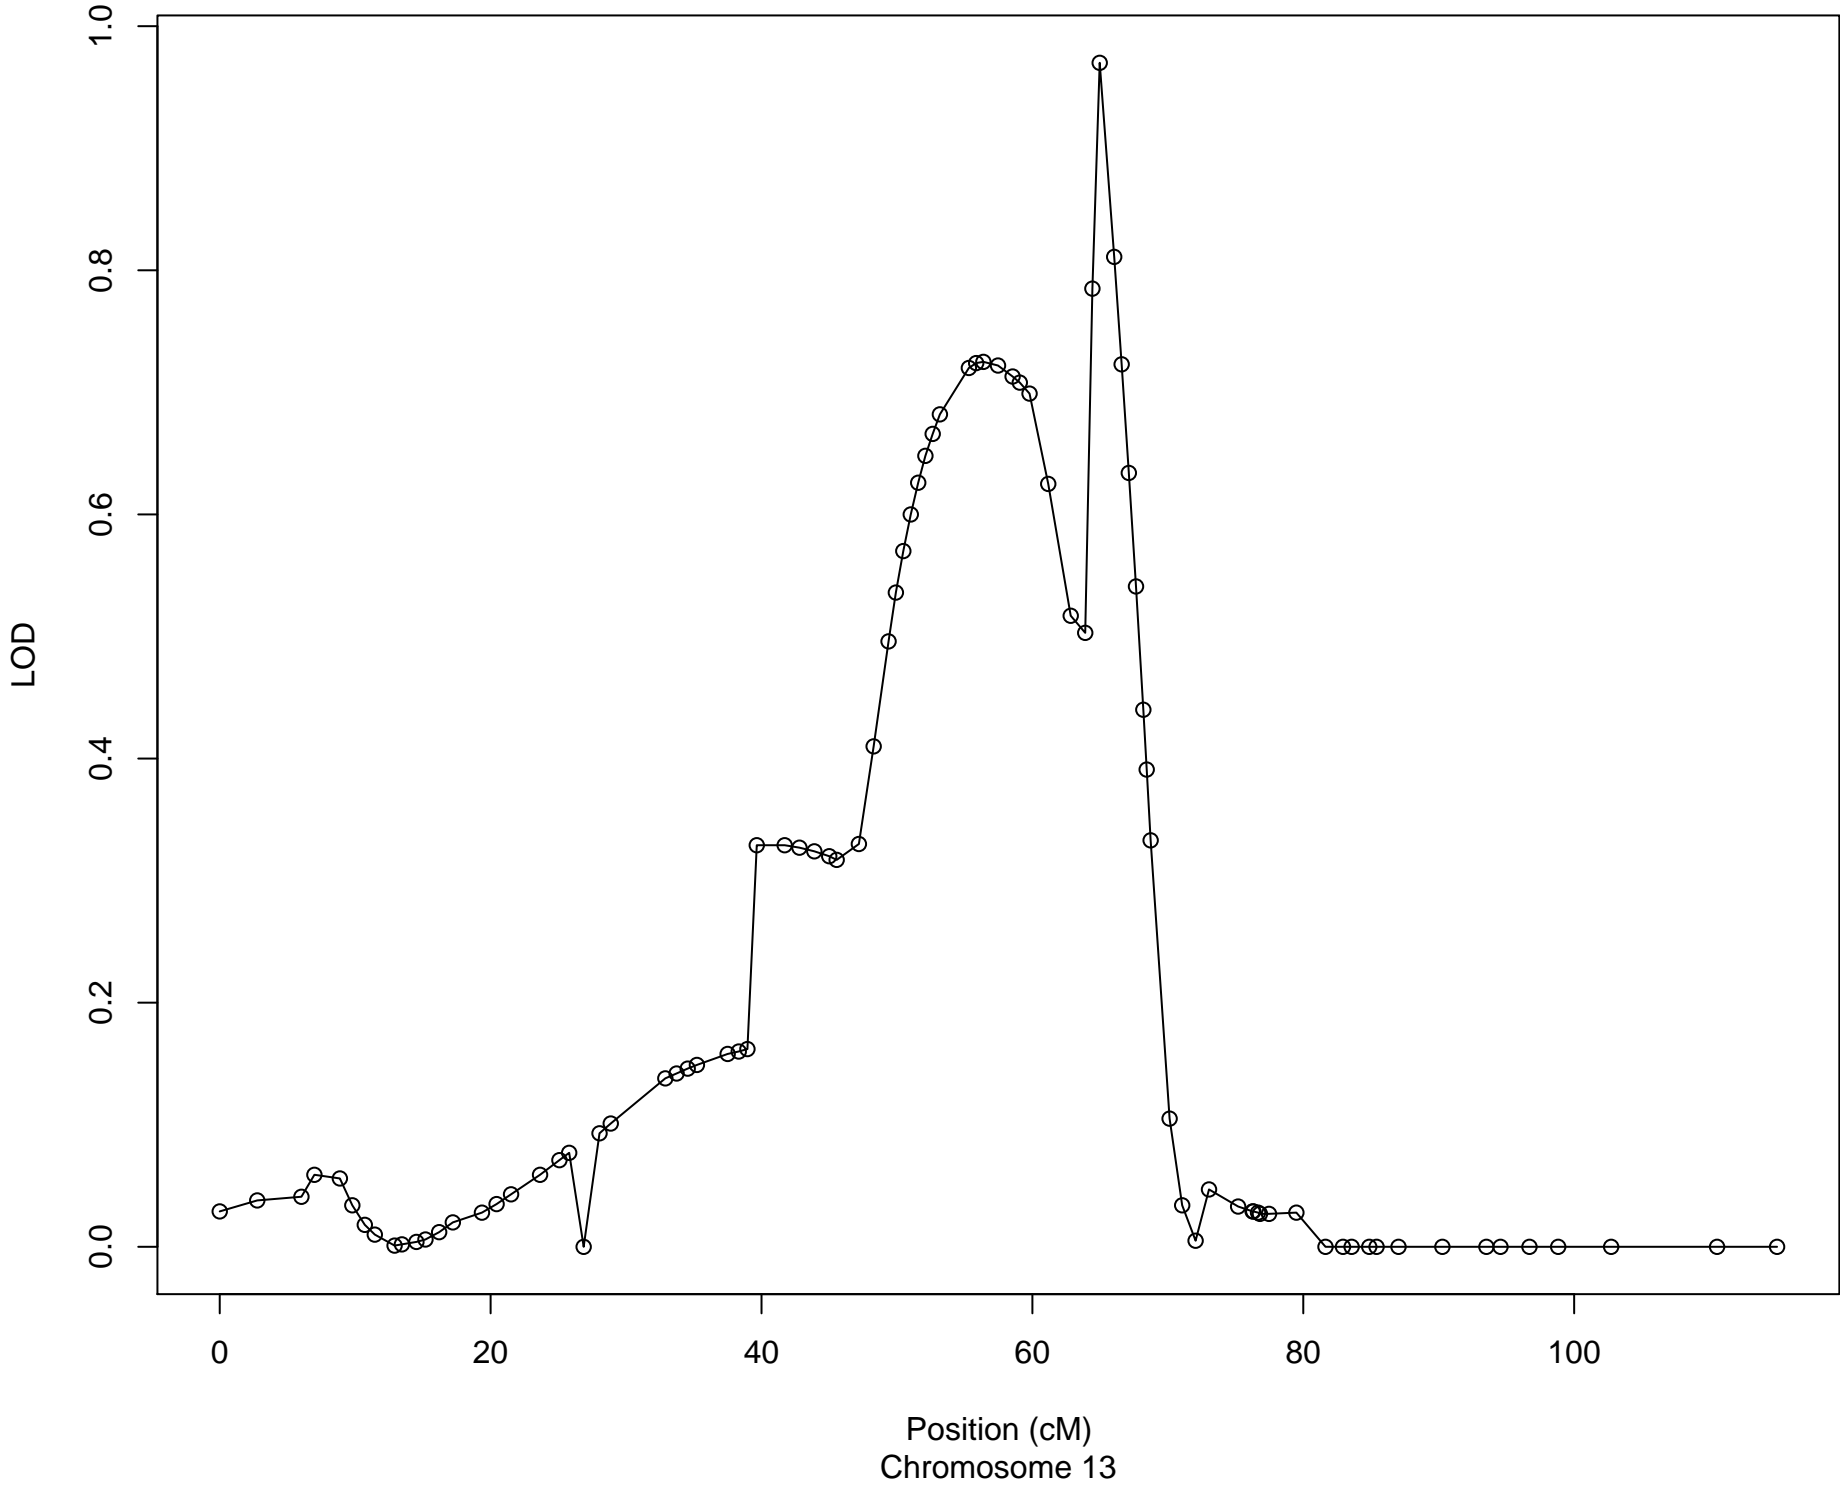

# Growth (1\_DMSO) (GR\_1\_DMSO)

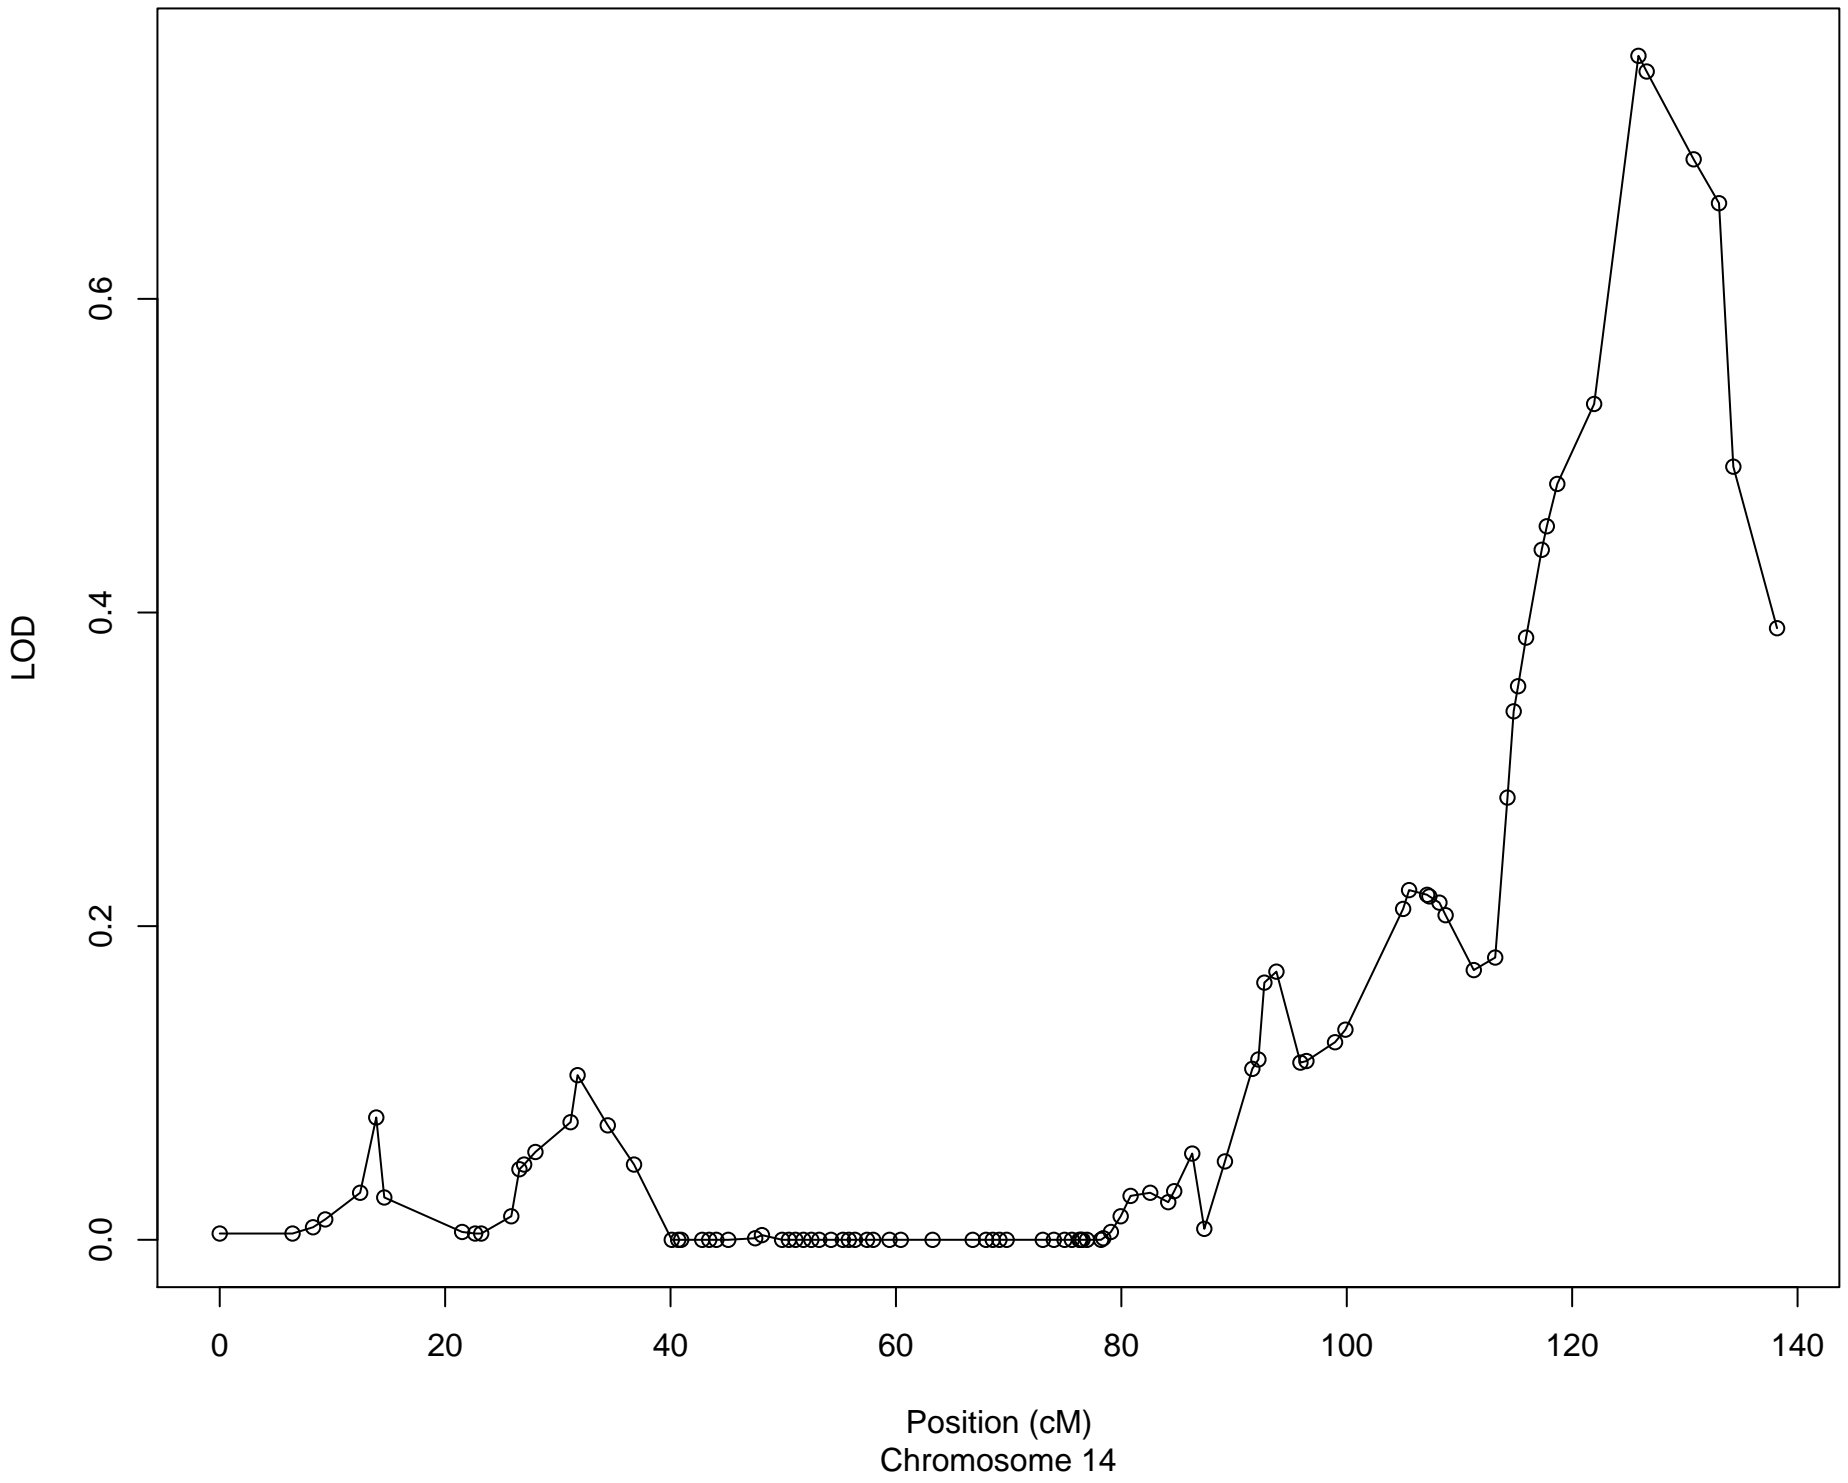

# Growth (1\_DMSO) (GR\_1\_DMSO)

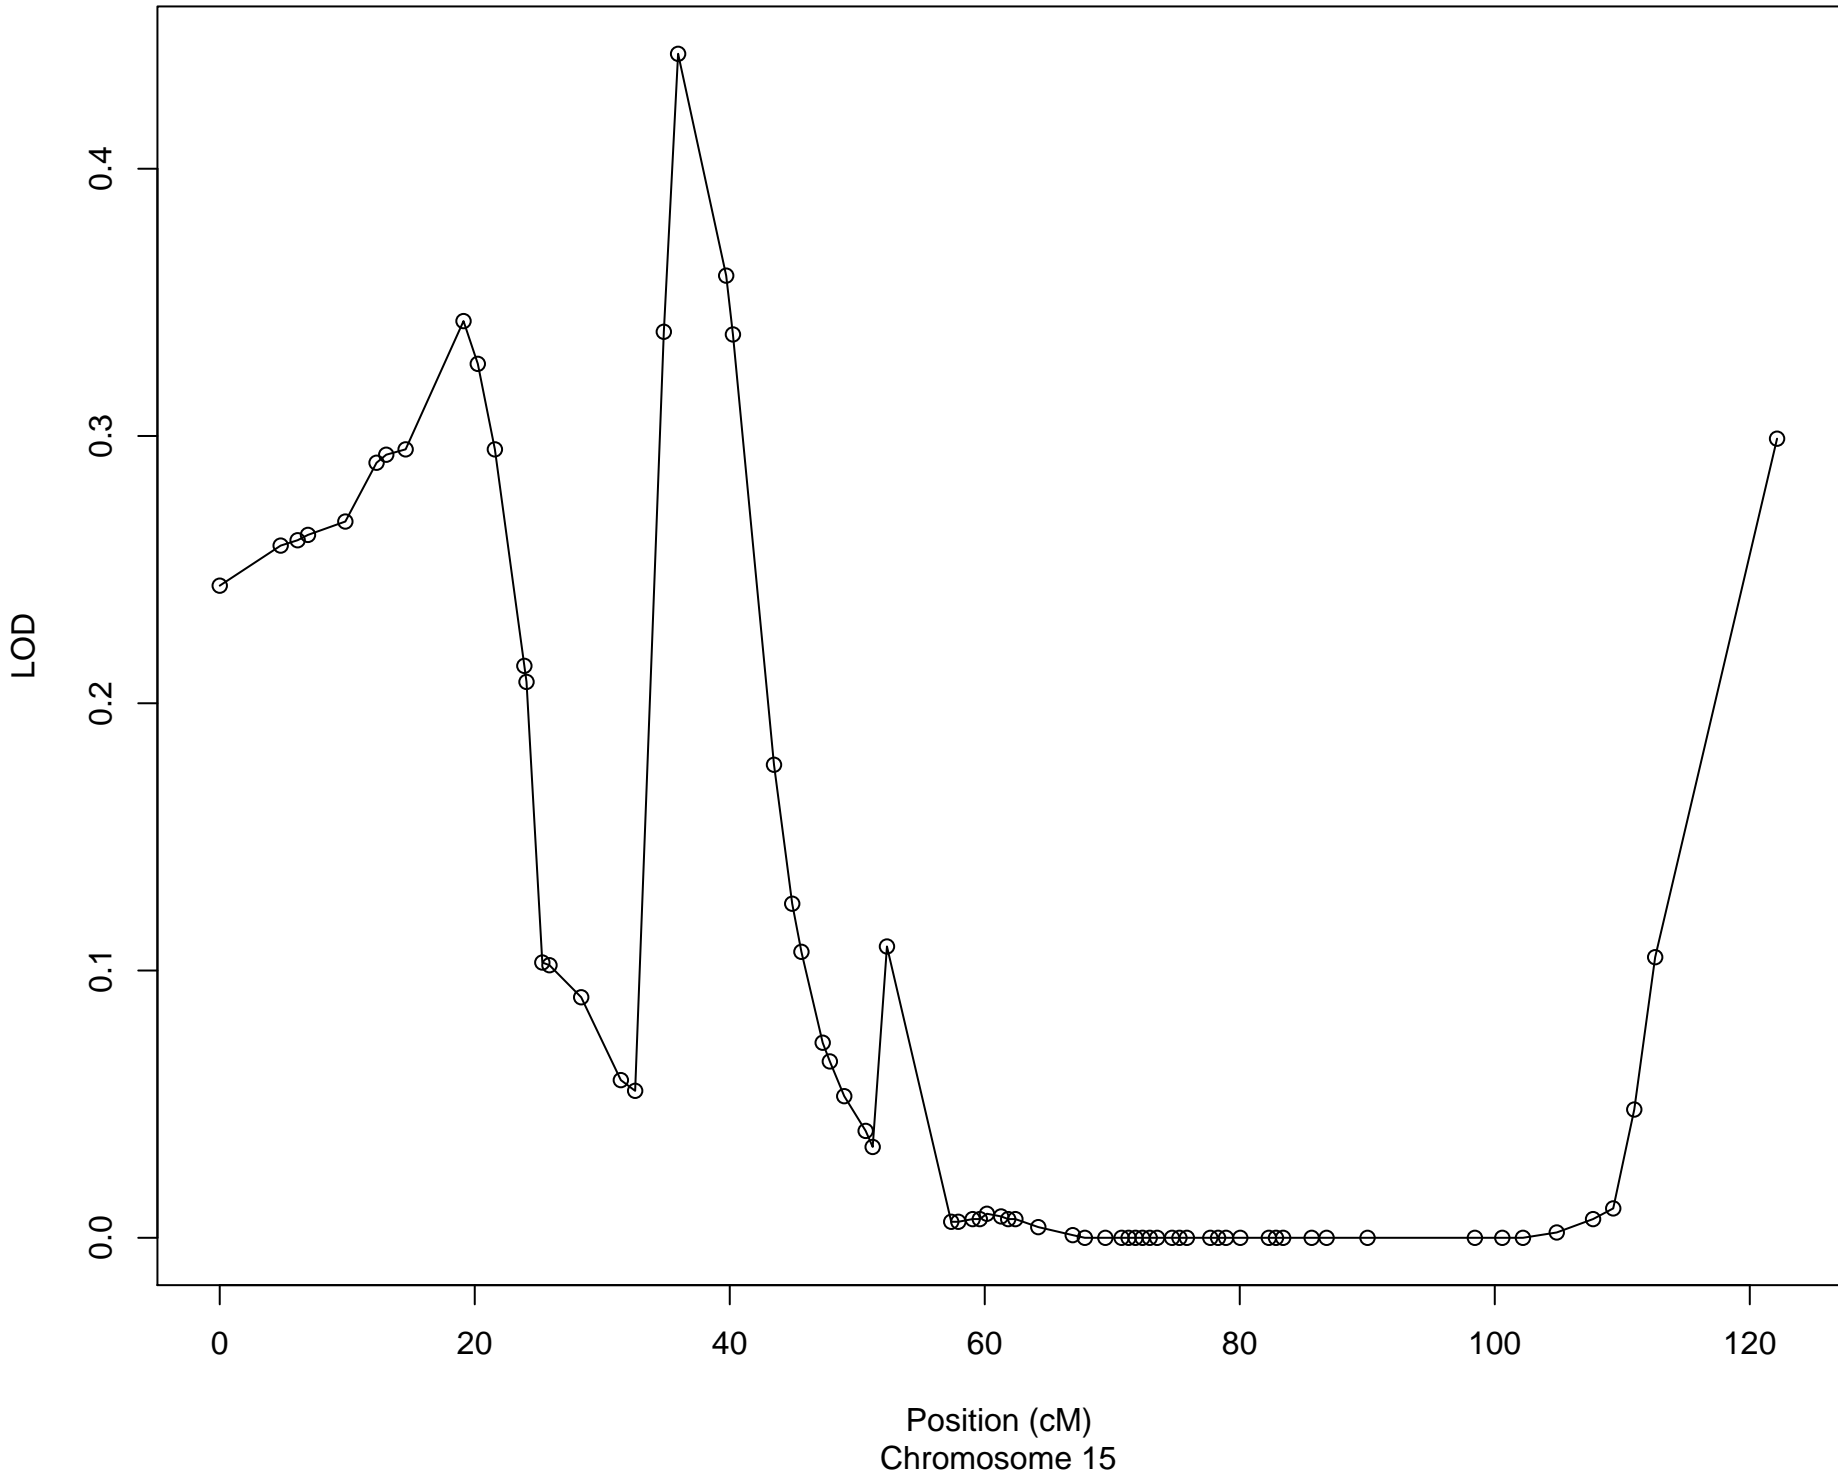

# Growth (1\_DMSO) (GR\_1\_DMSO)

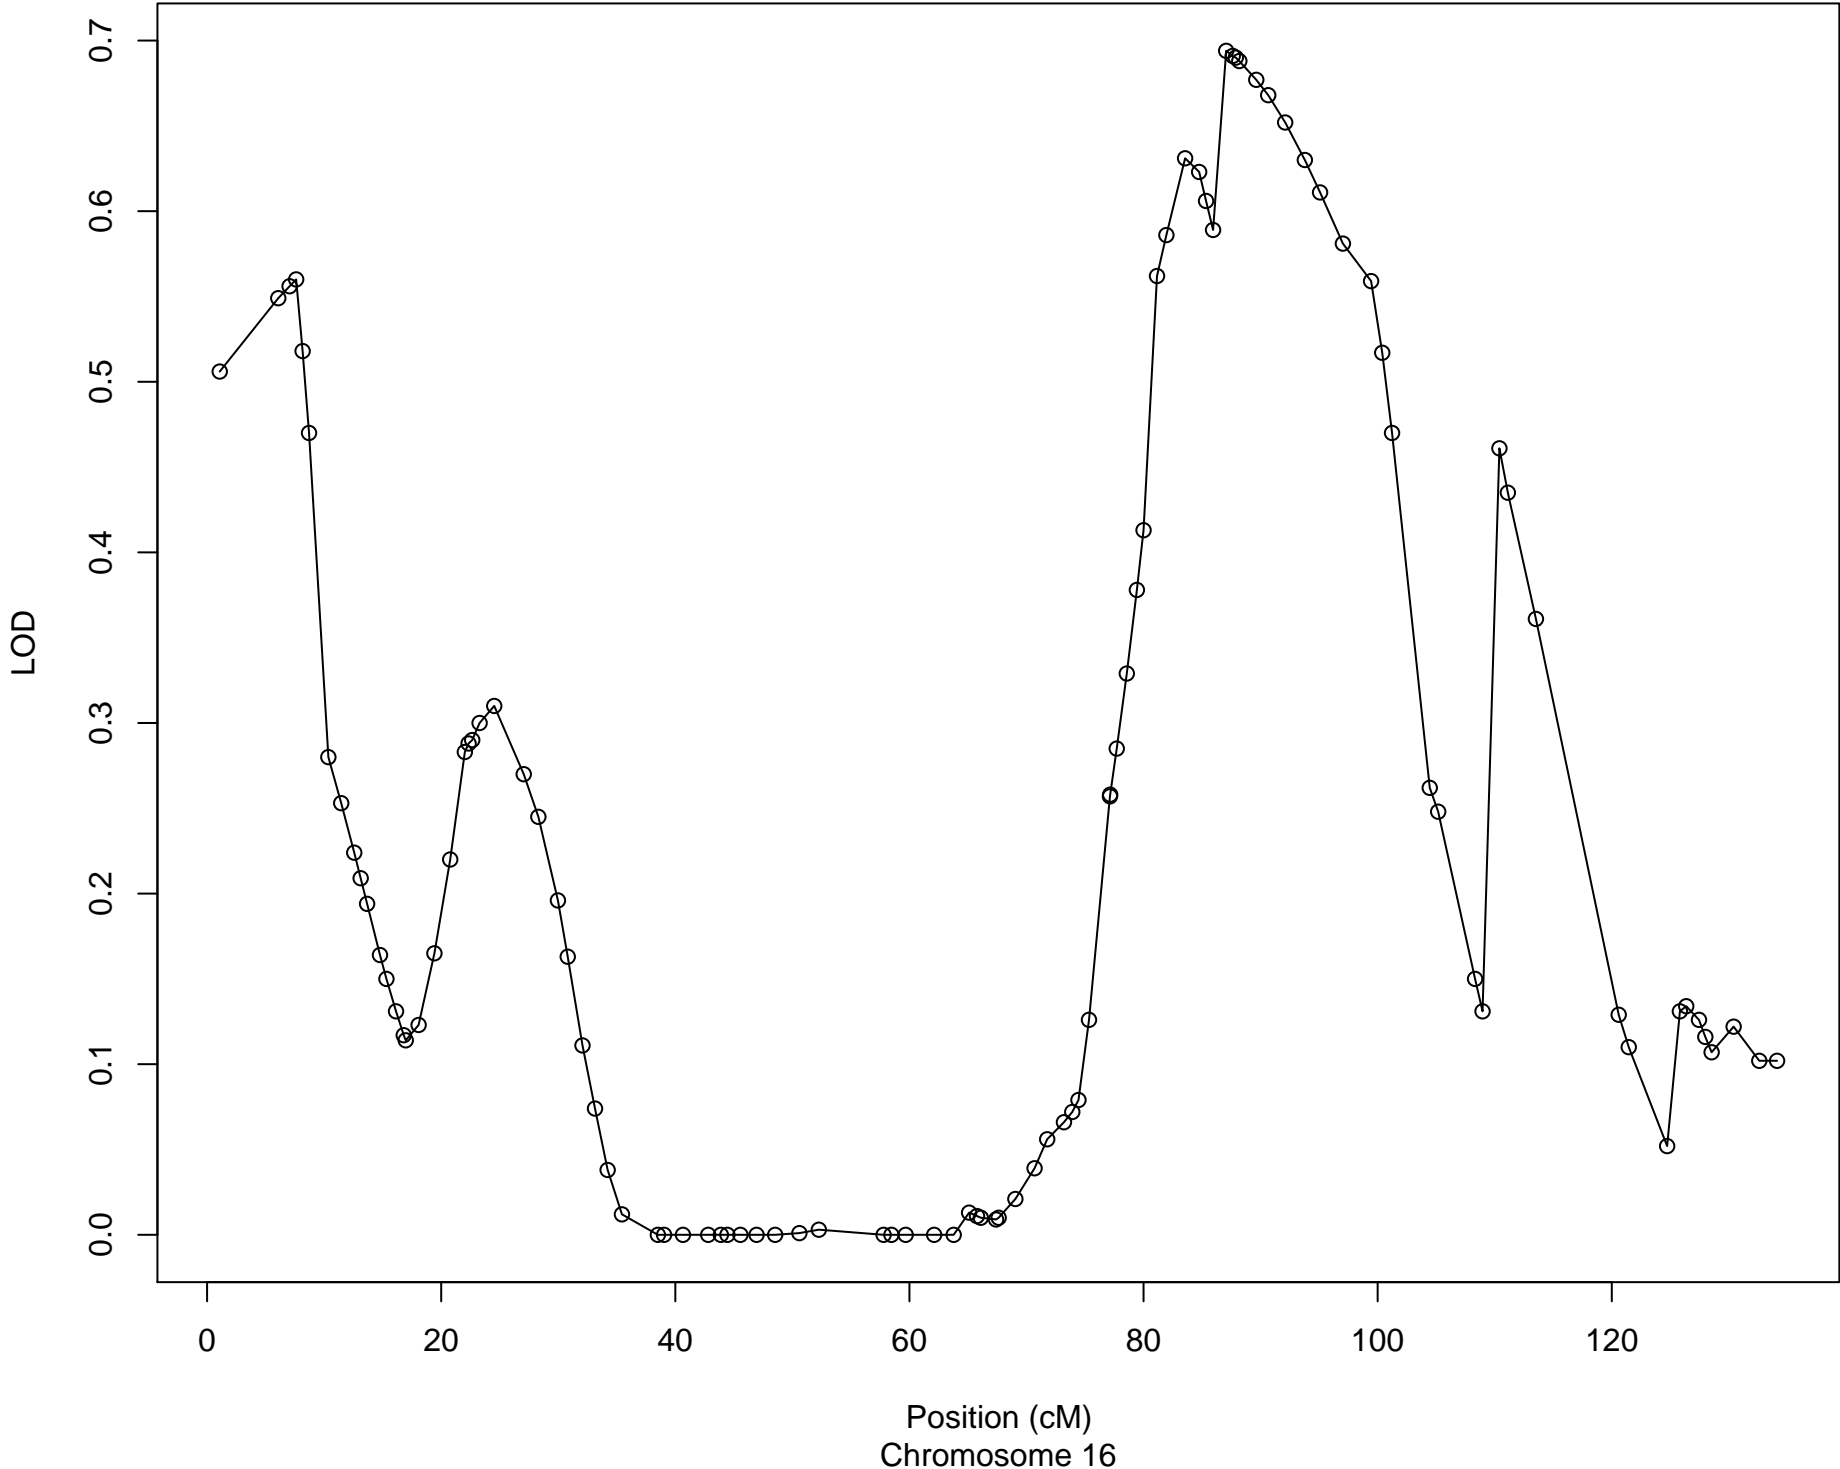



# Growth (1\_DMSO) (GR\_1\_DMSO)

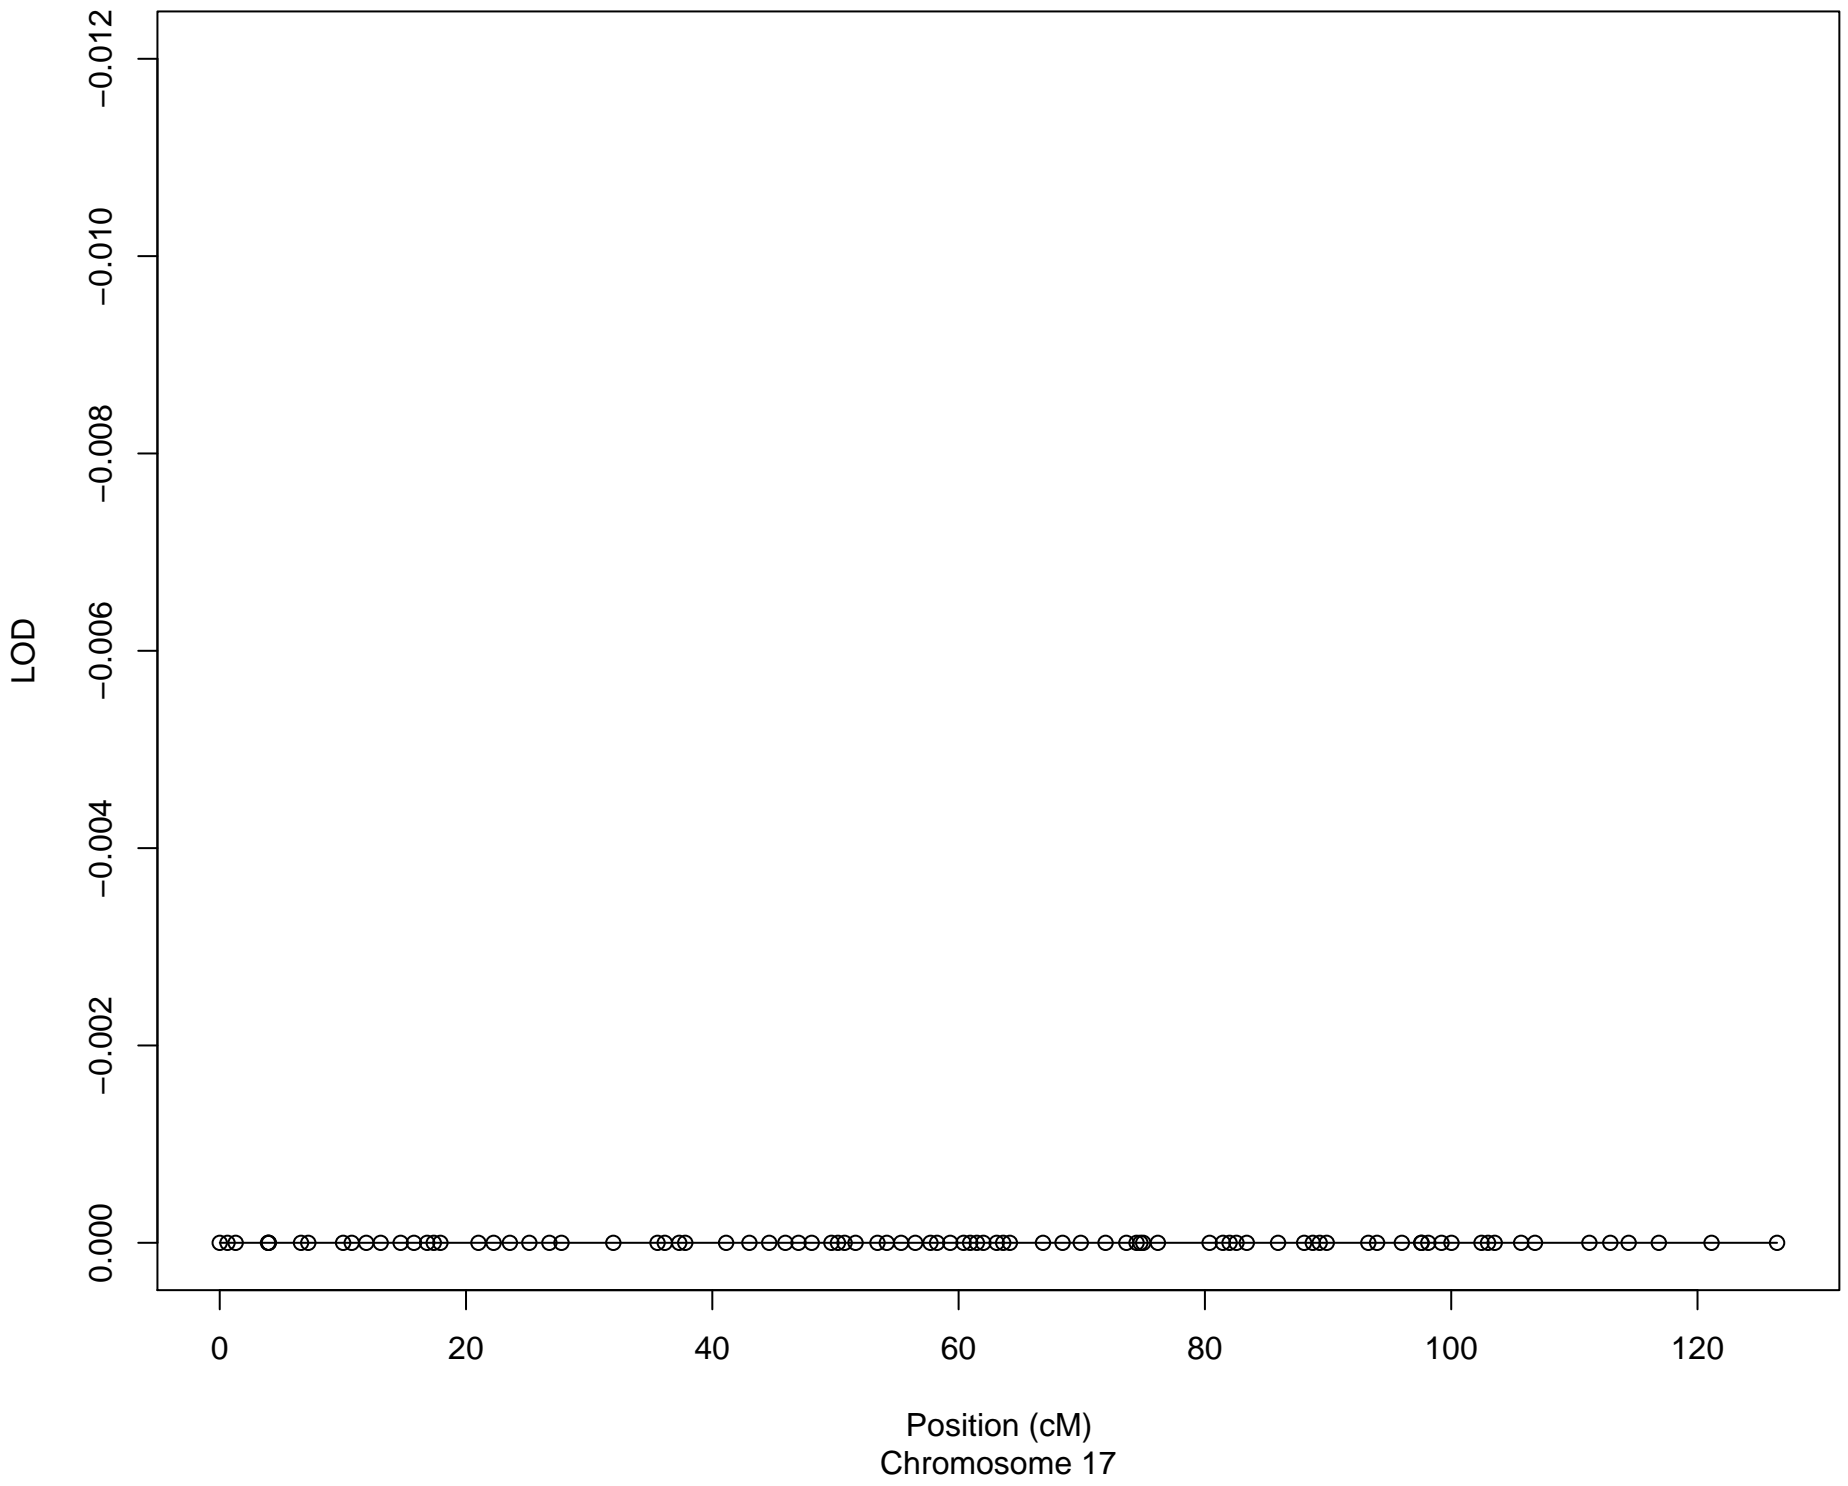

# Growth (1\_DMSO) (GR\_1\_DMSO)

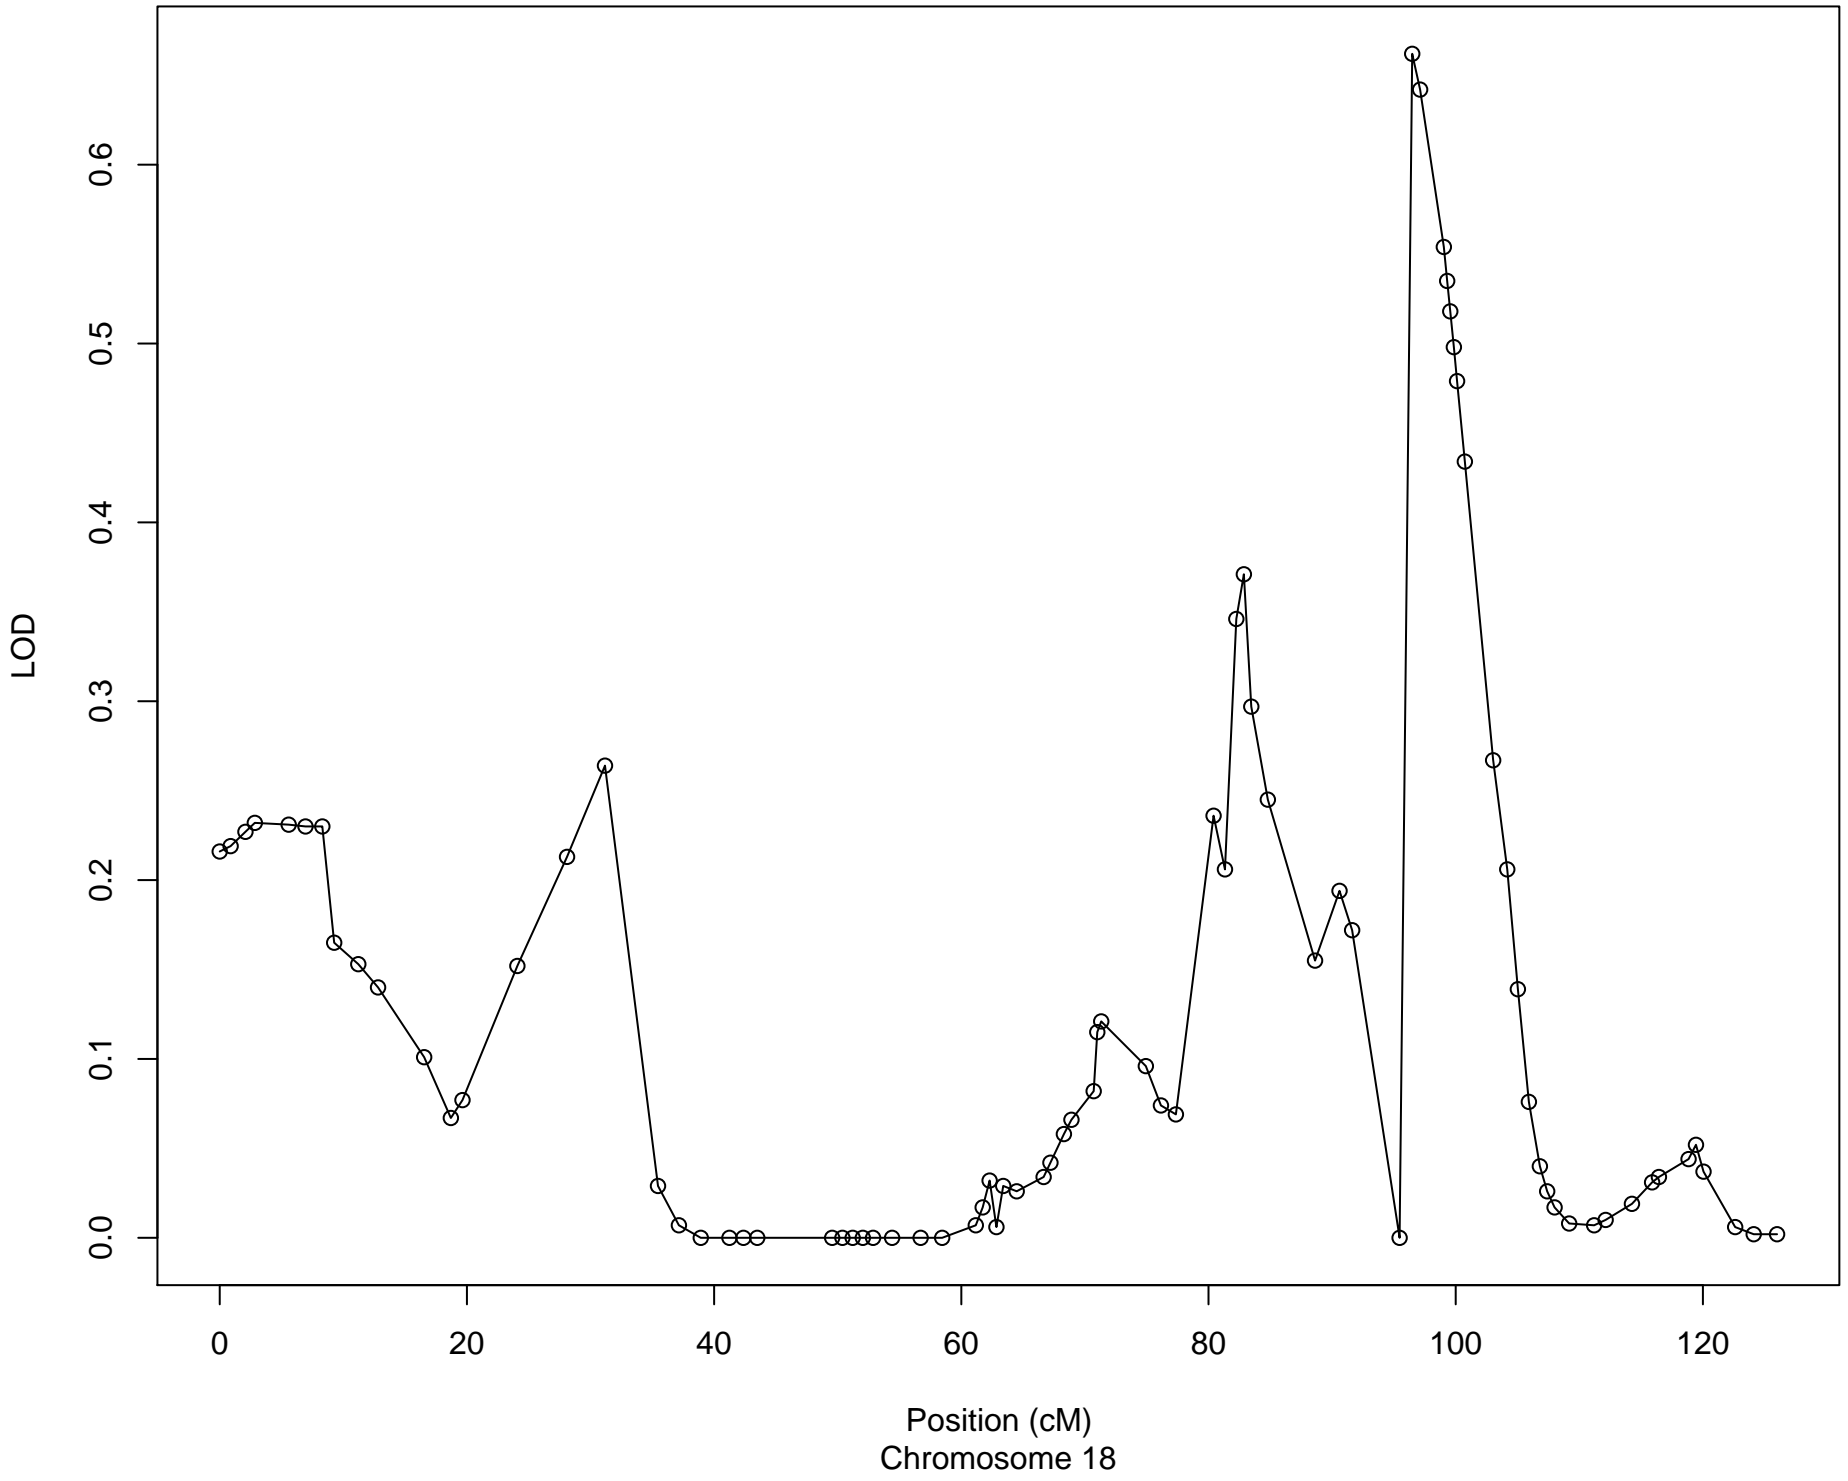

# Growth (1\_DMSO) (GR\_1\_DMSO)

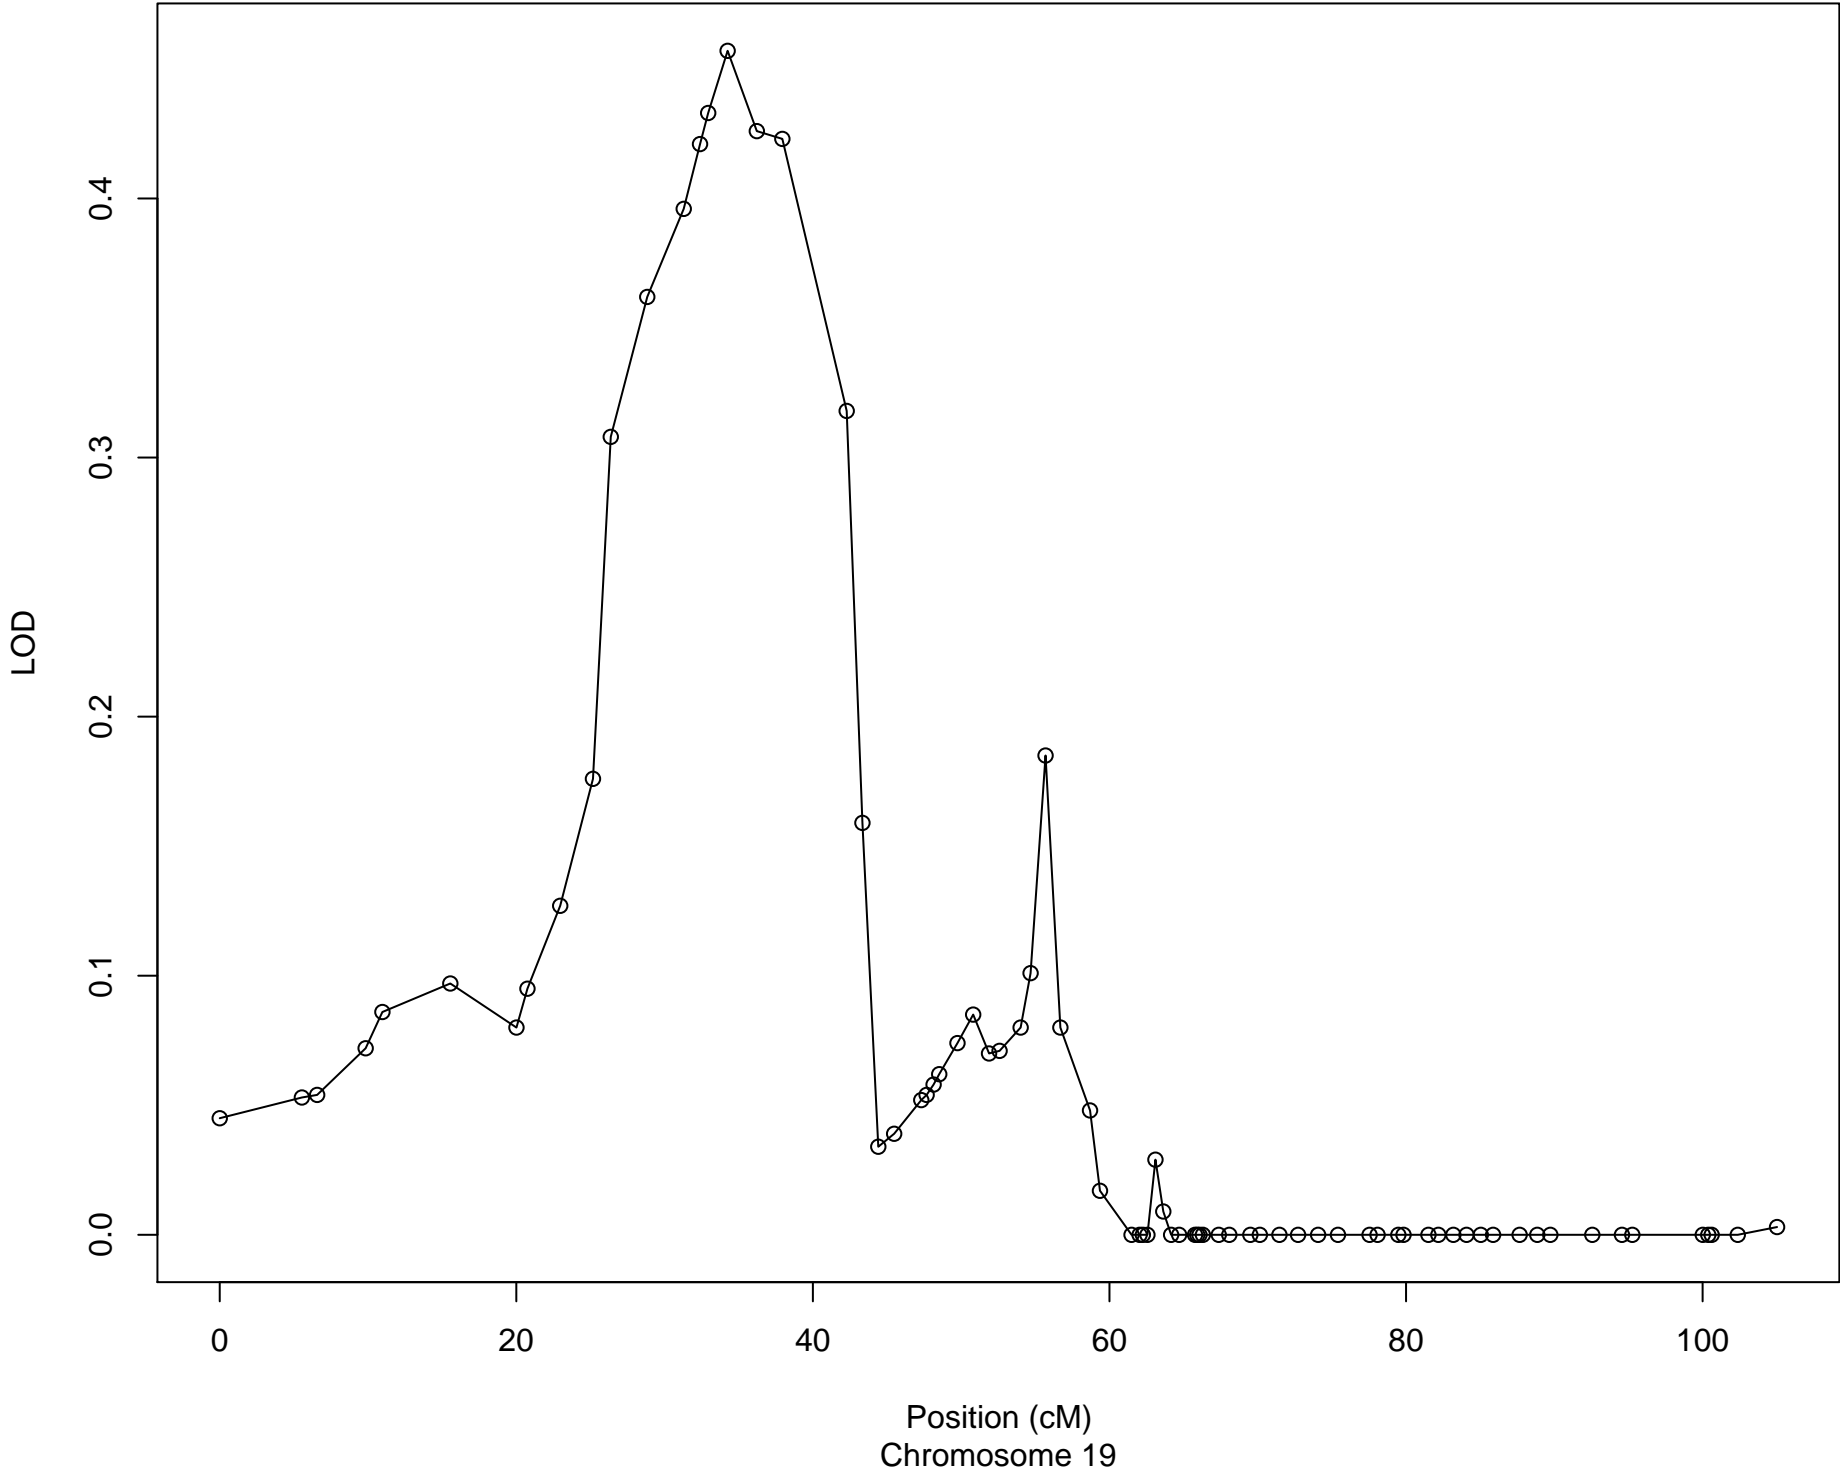

# Growth (1\_DMSO) (GR\_1\_DMSO)

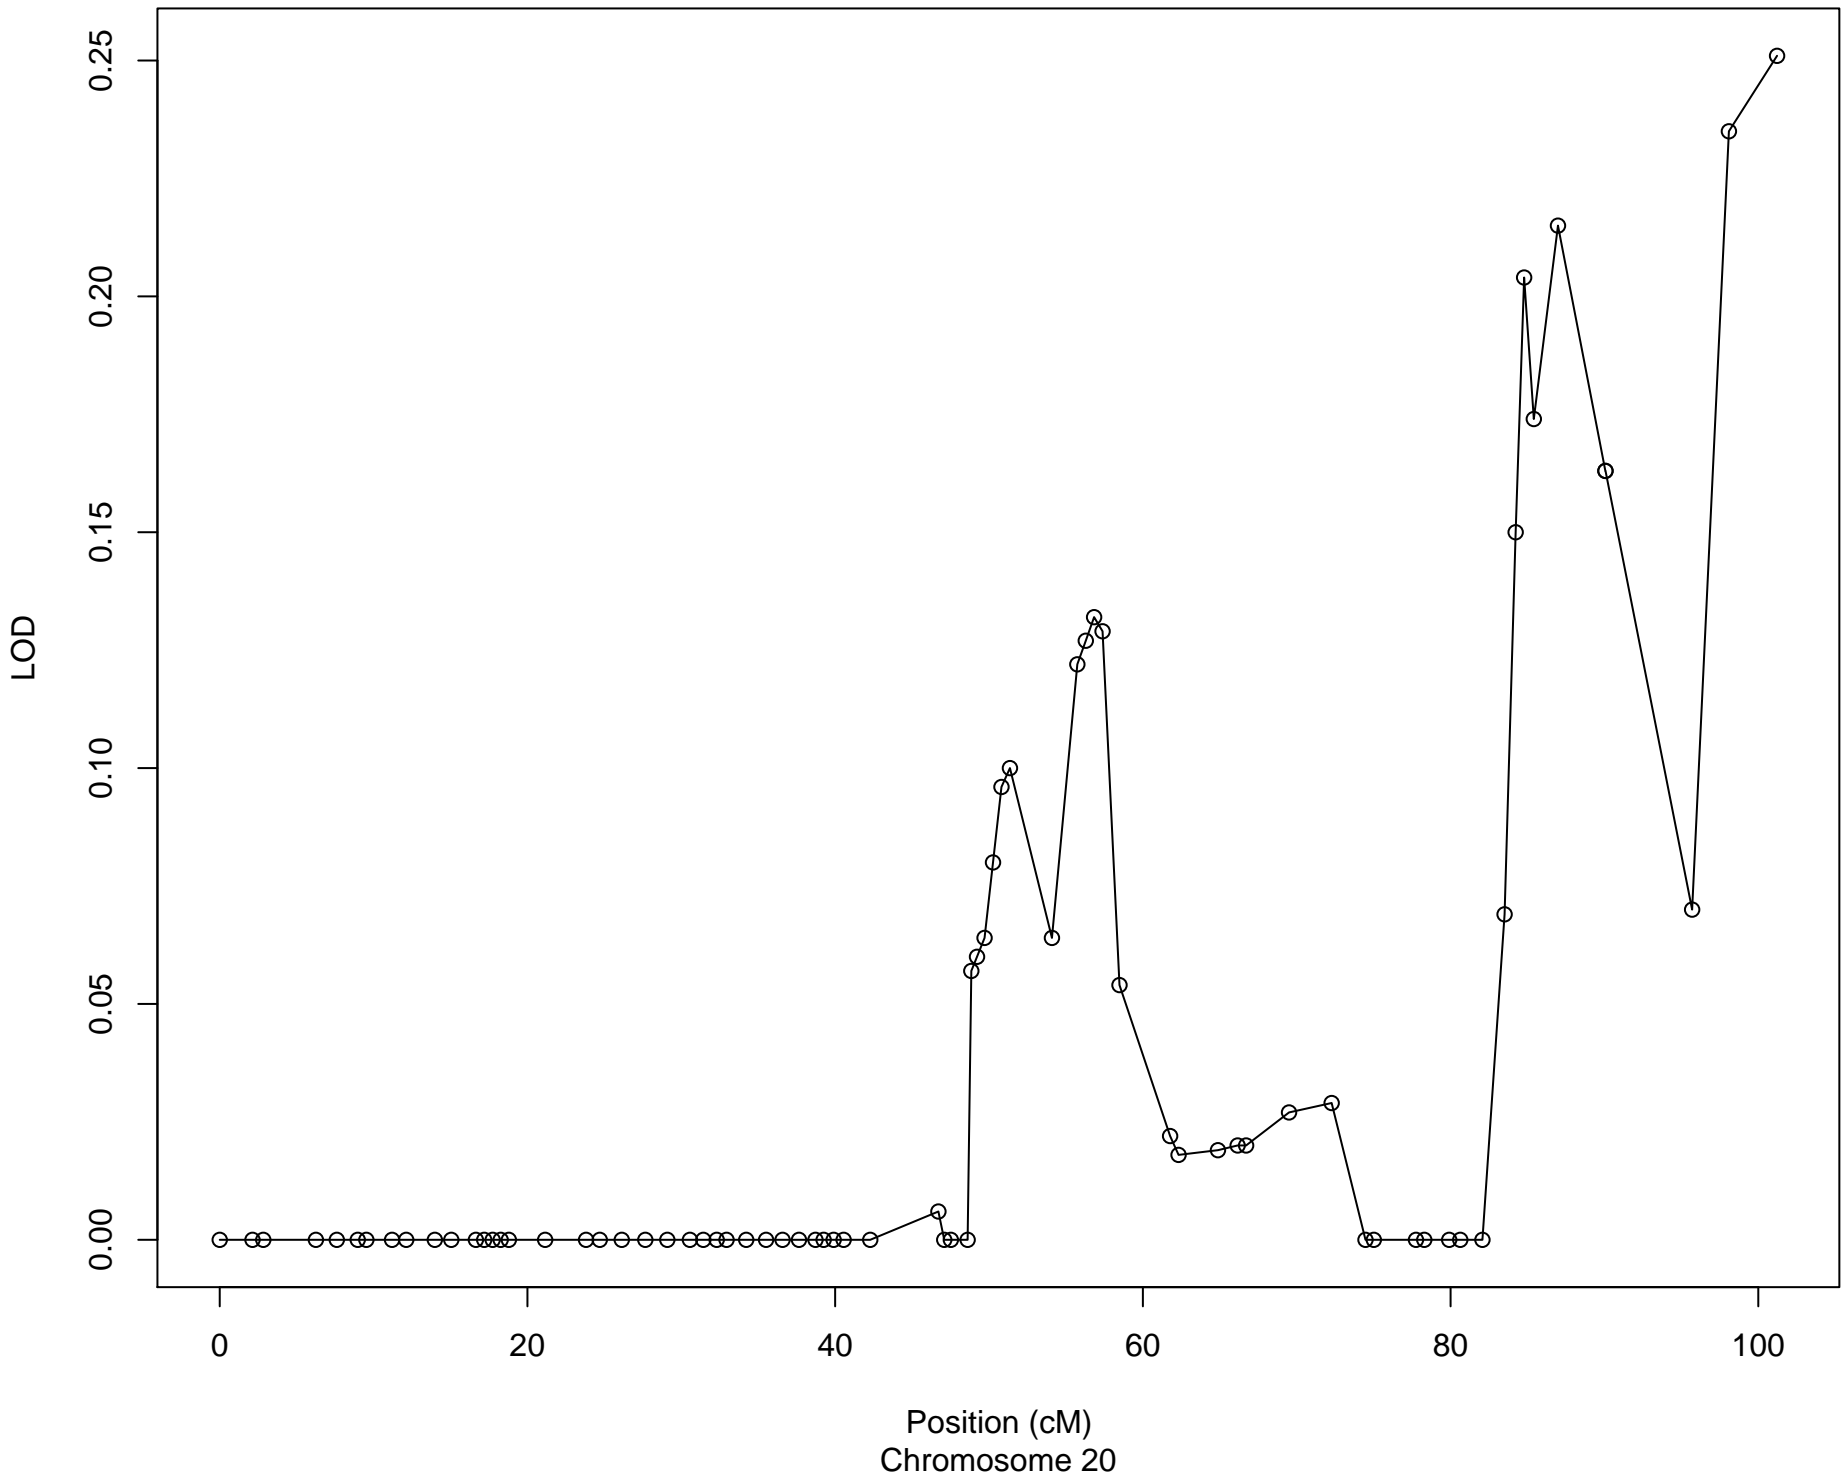

# Growth (1\_DMSO) (GR\_1\_DMSO)

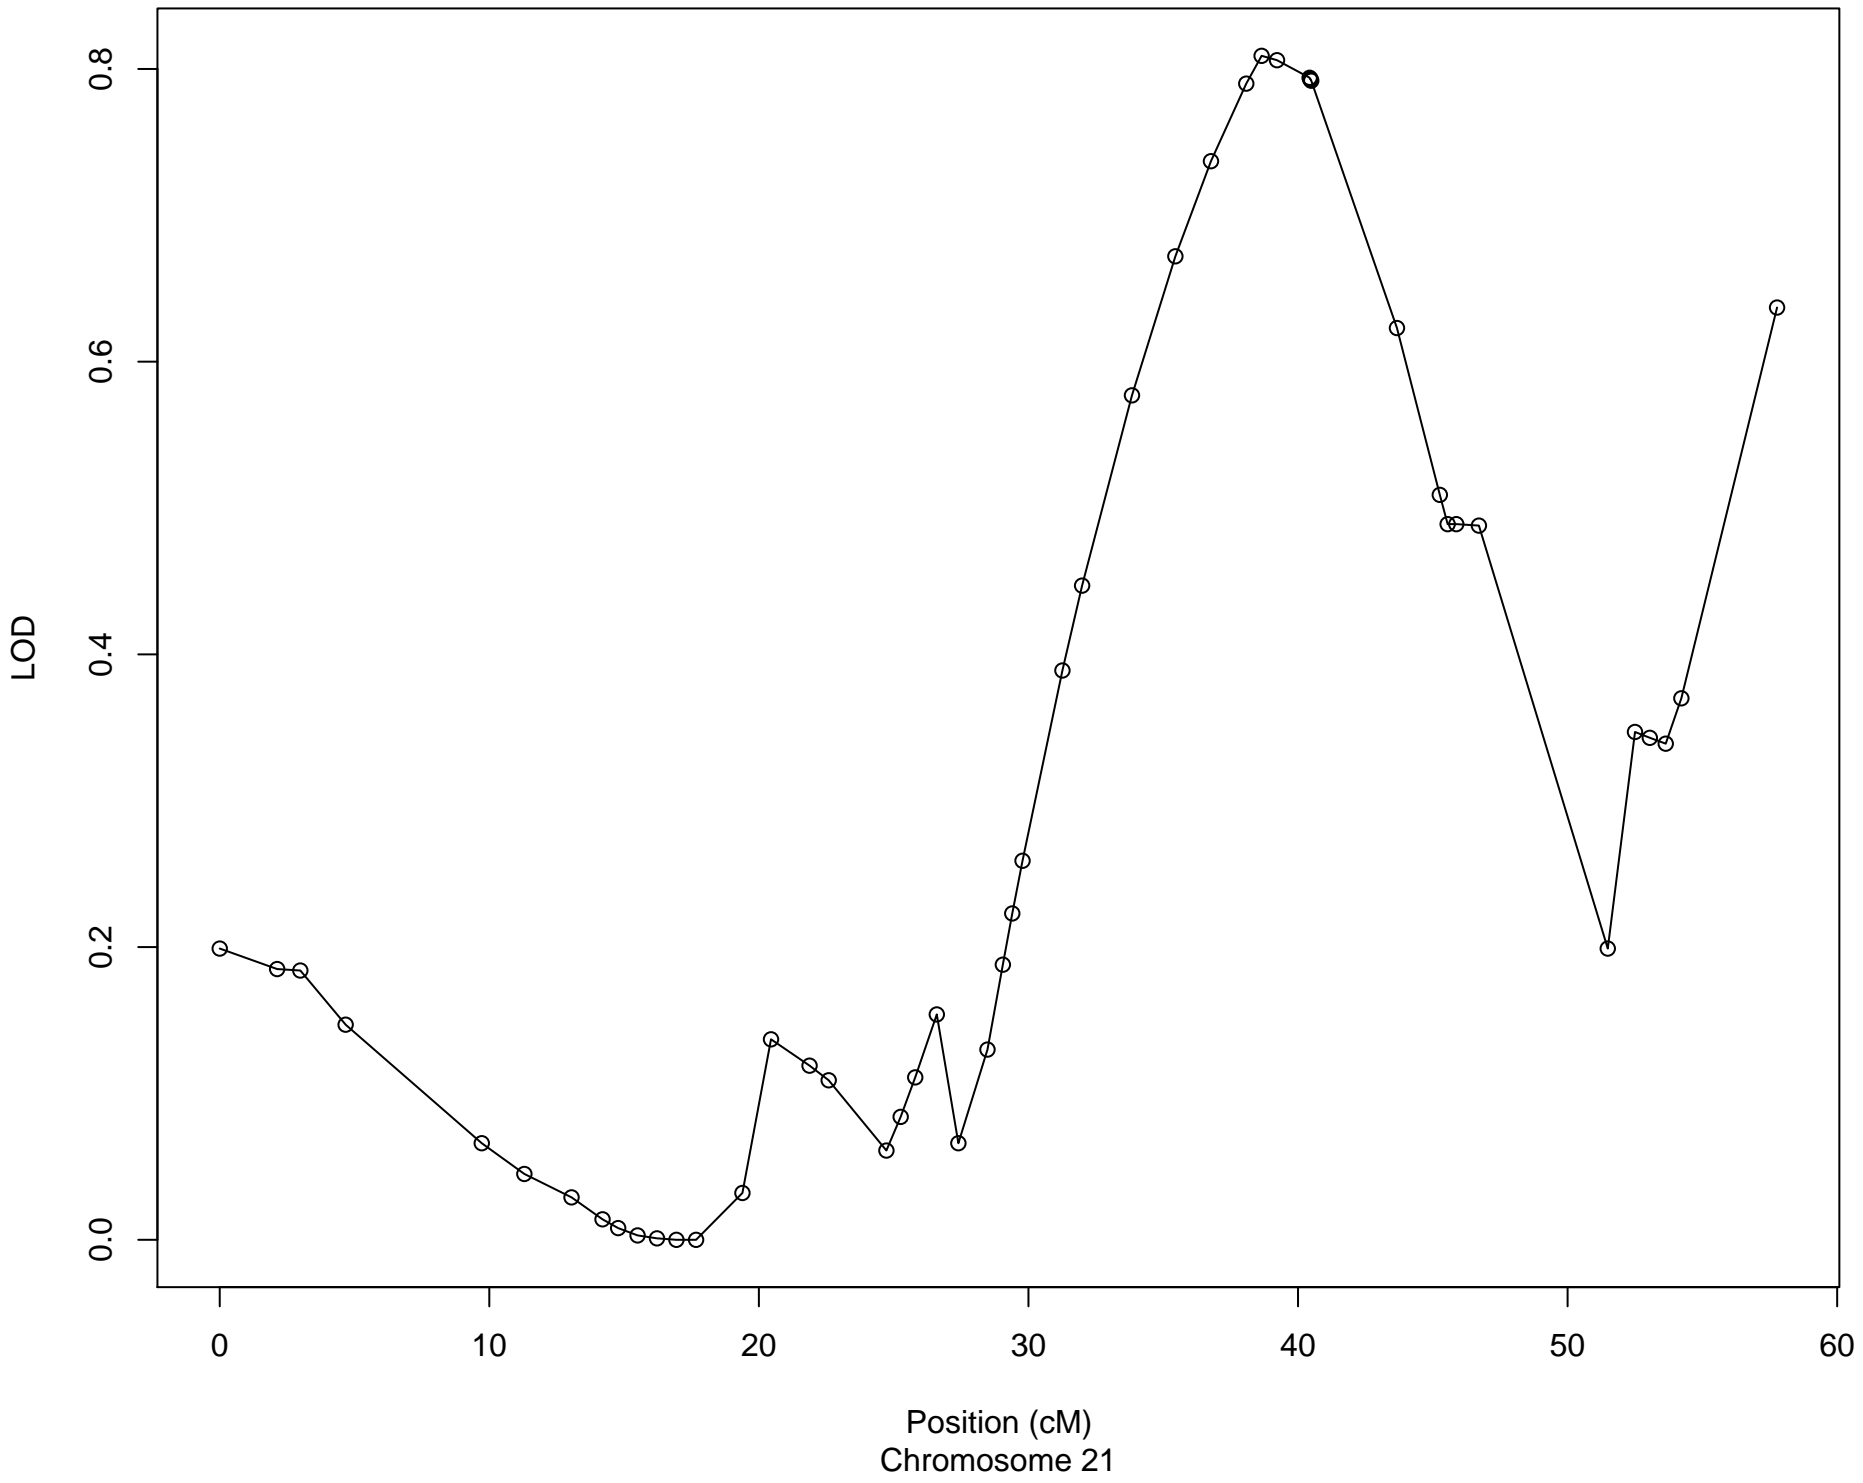

# Growth (1\_DMSO) (GR\_1\_DMSO)

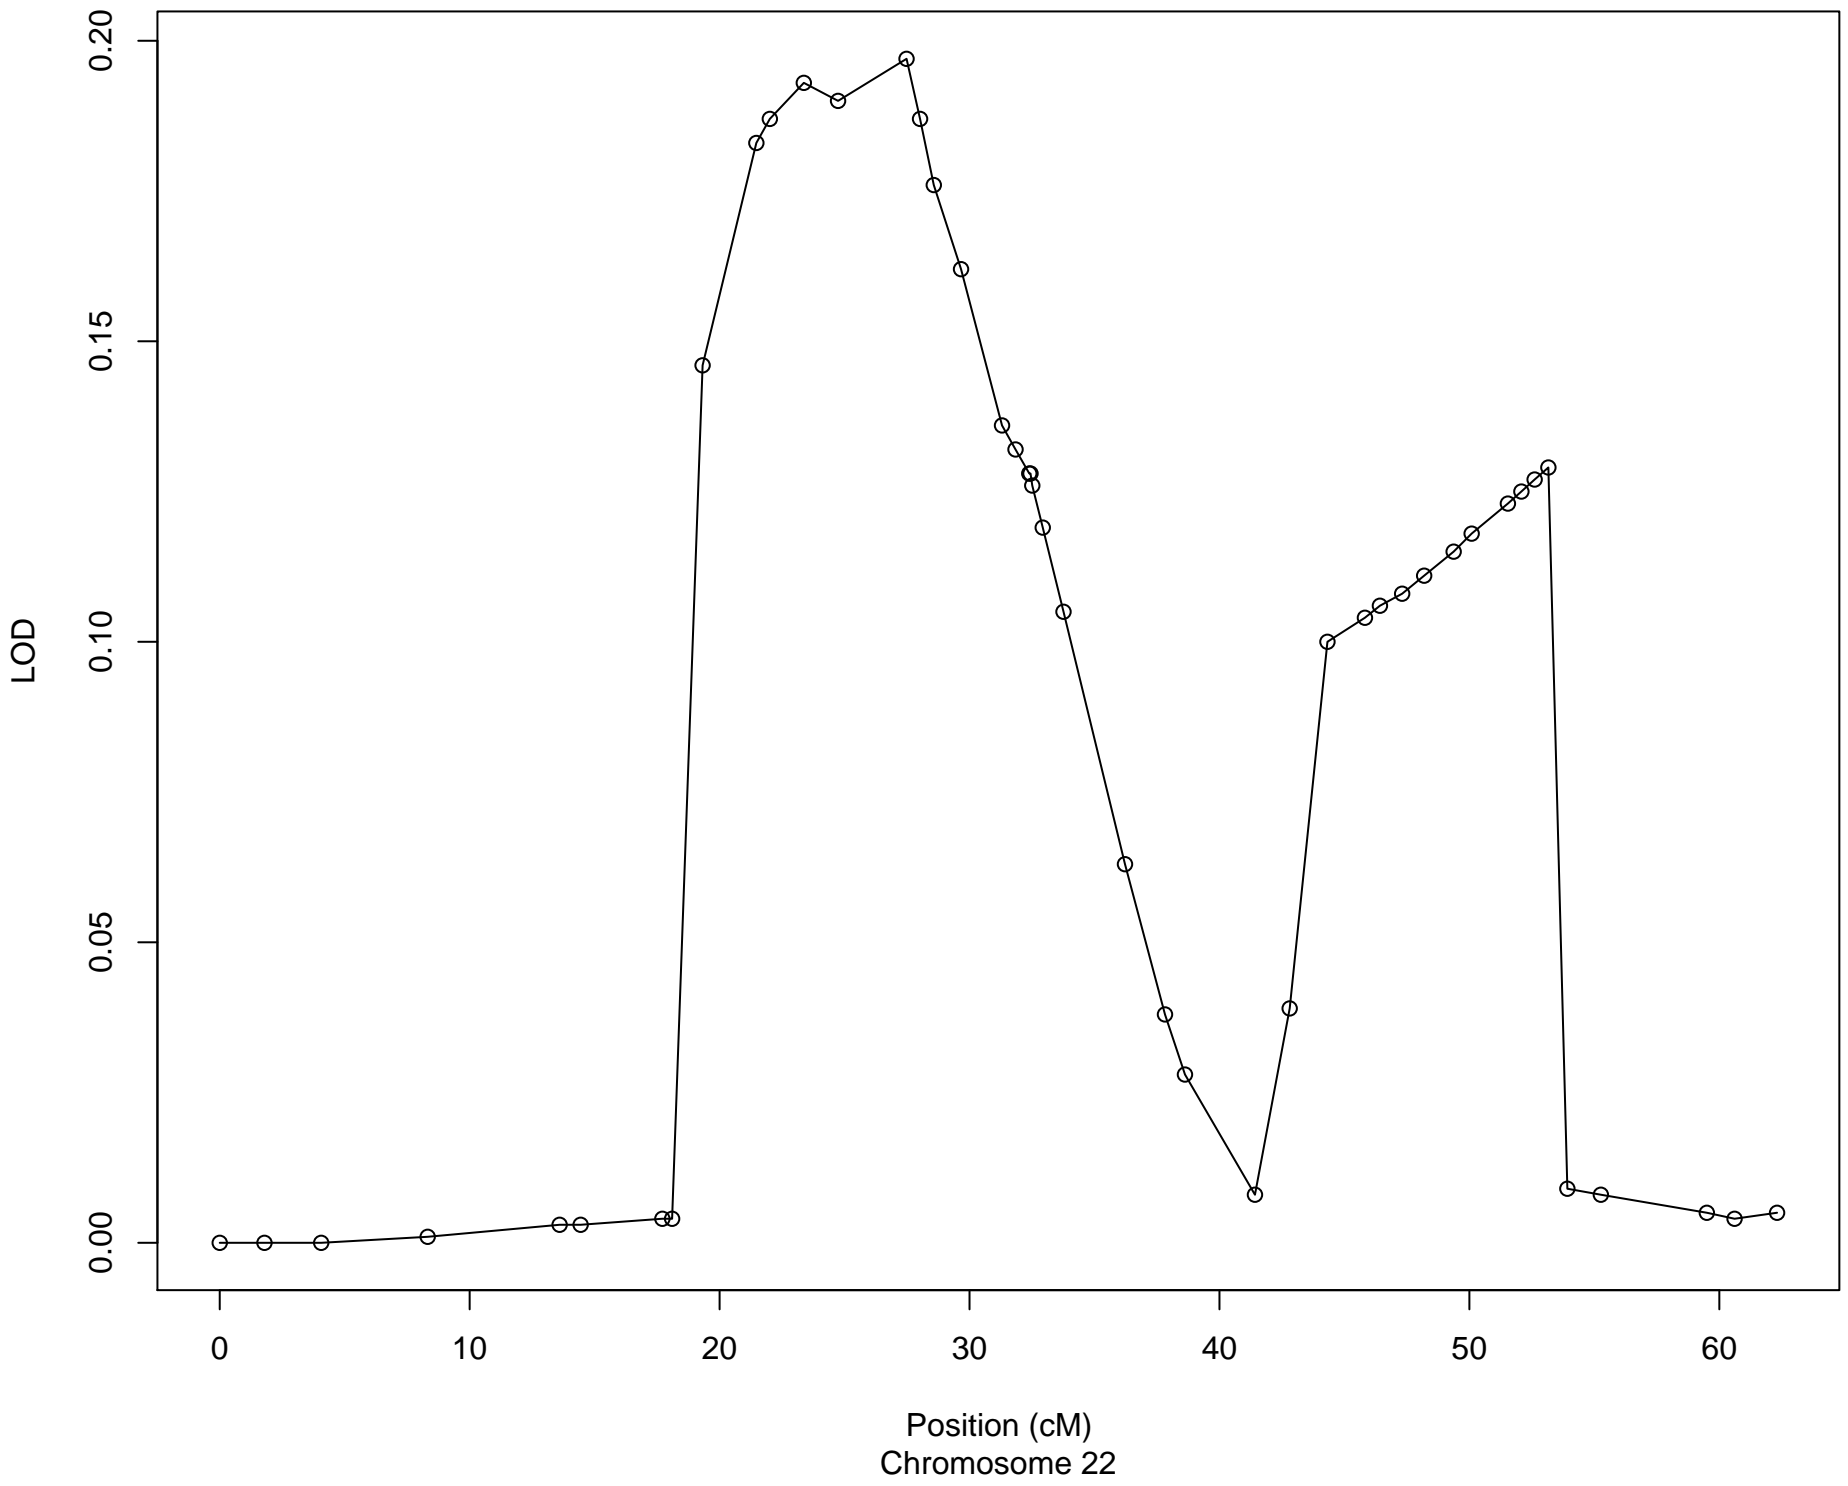

# IC50 (9-aminocamptothecin) (IC50\_9AC)

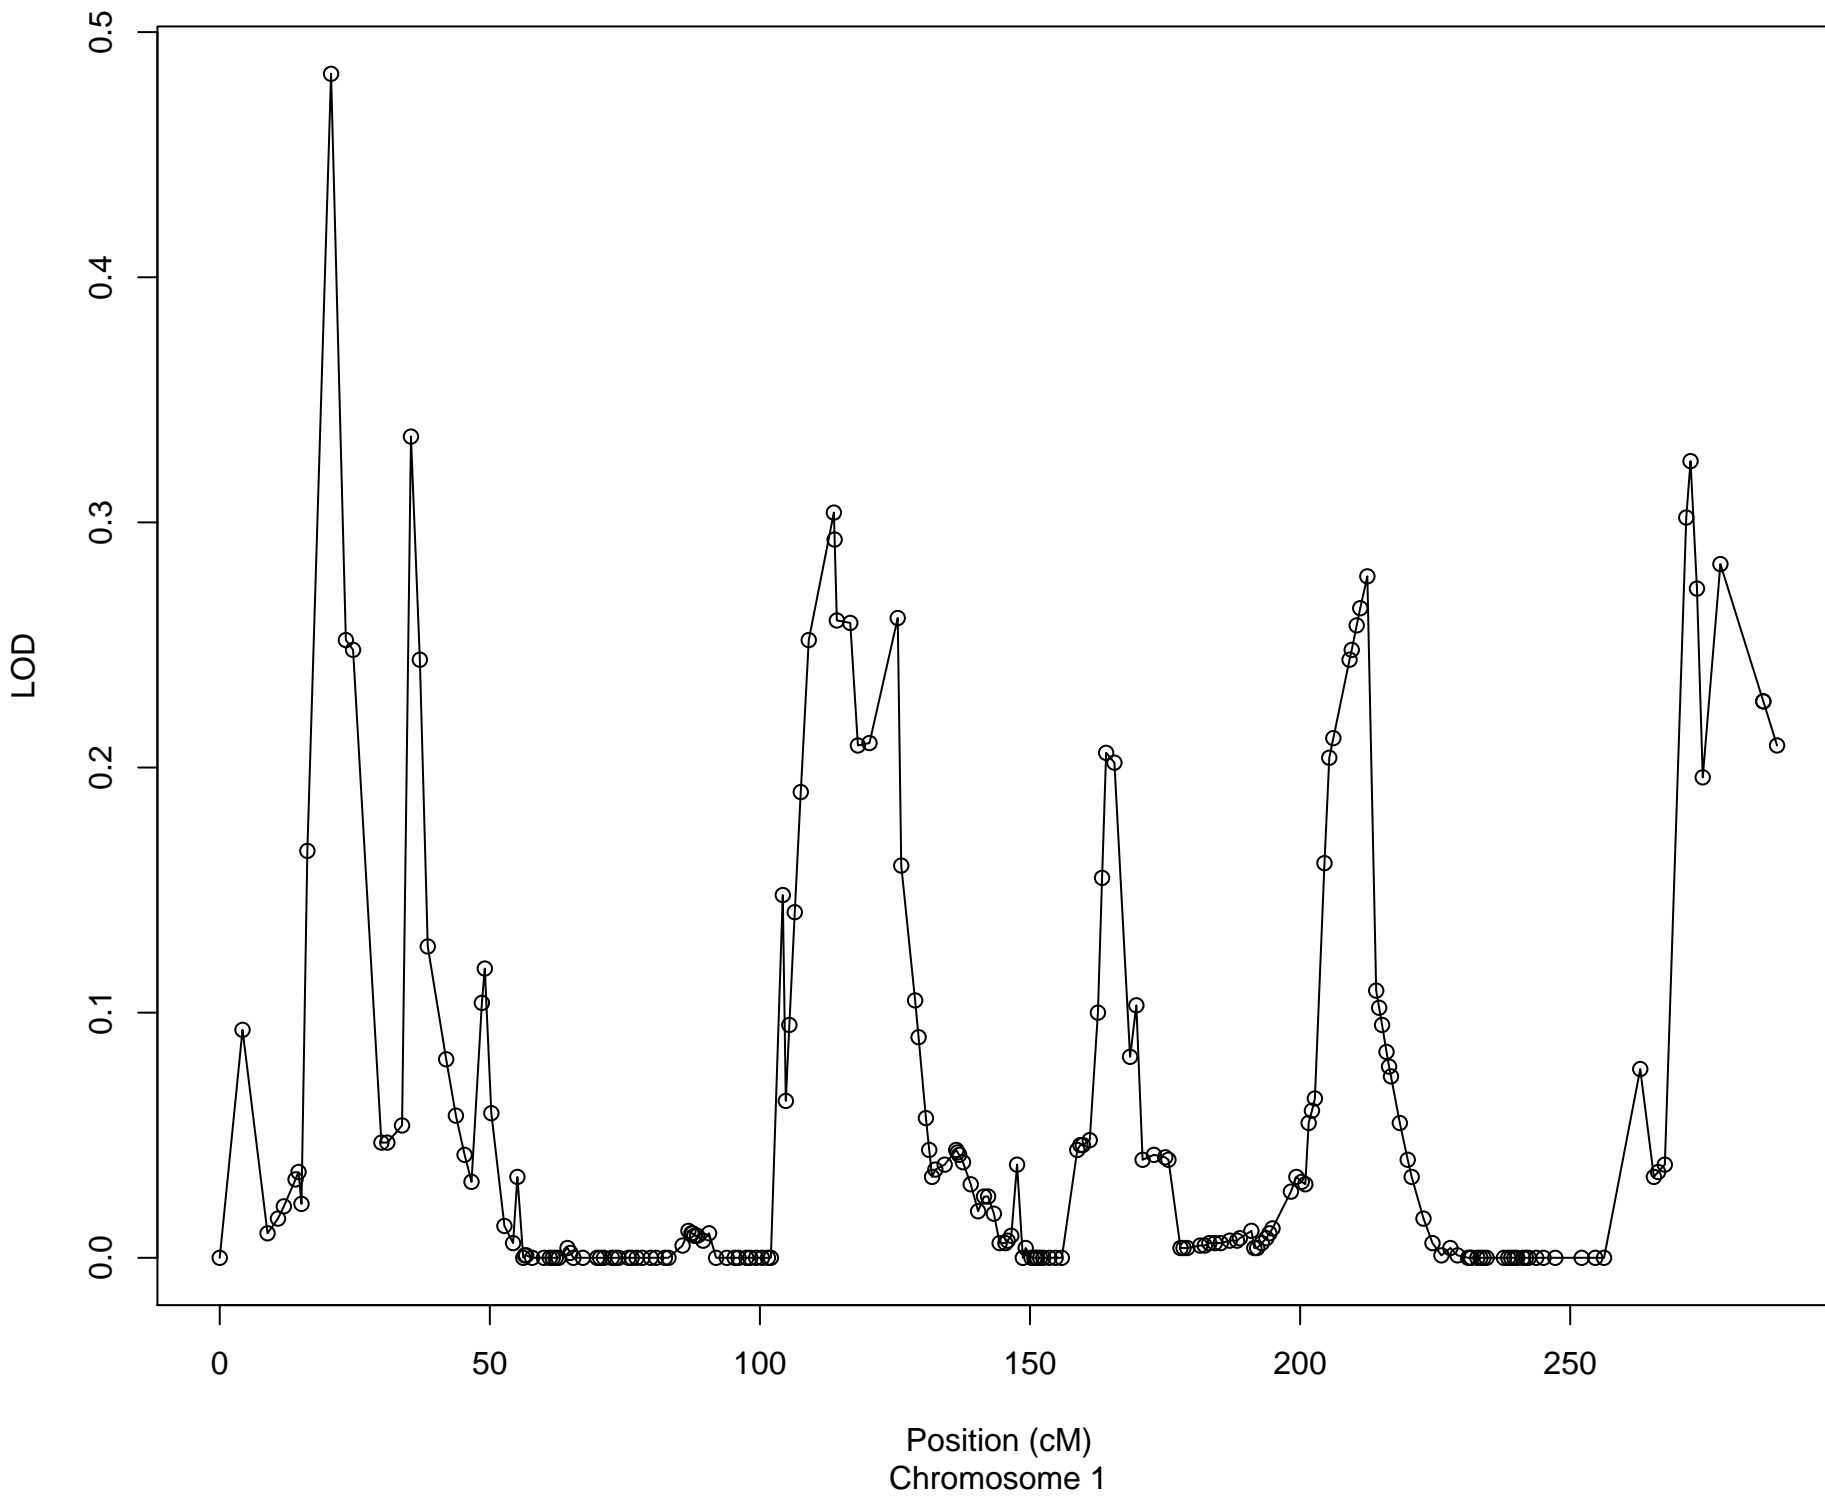

# IC50 (9-aminocamptothecin) (IC50\_9AC)

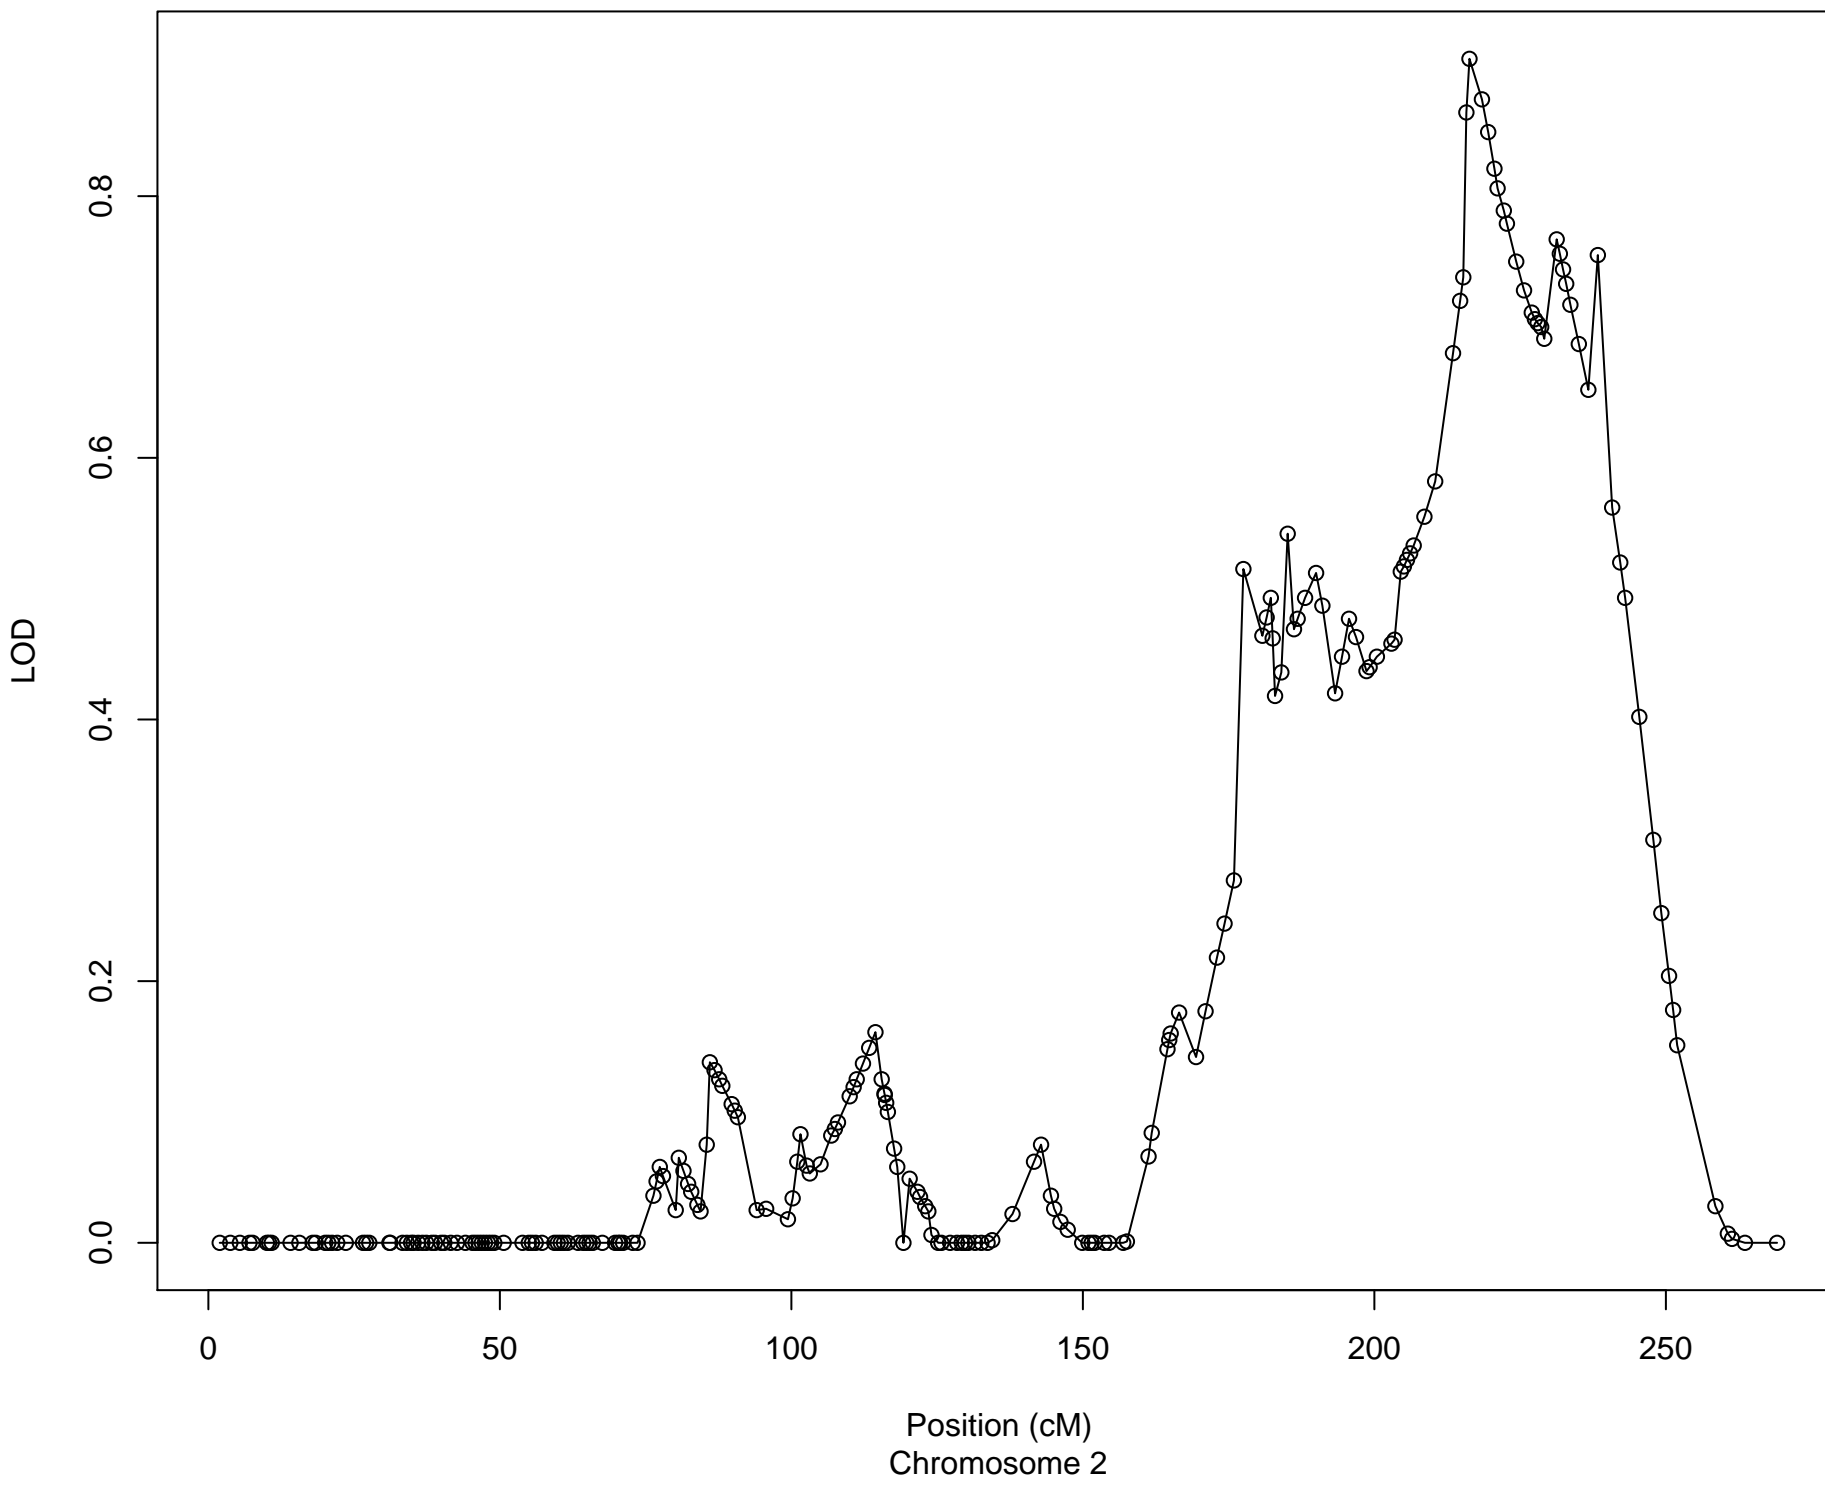



# IC50 (9-aminocamptothecin) (IC50\_9AC)

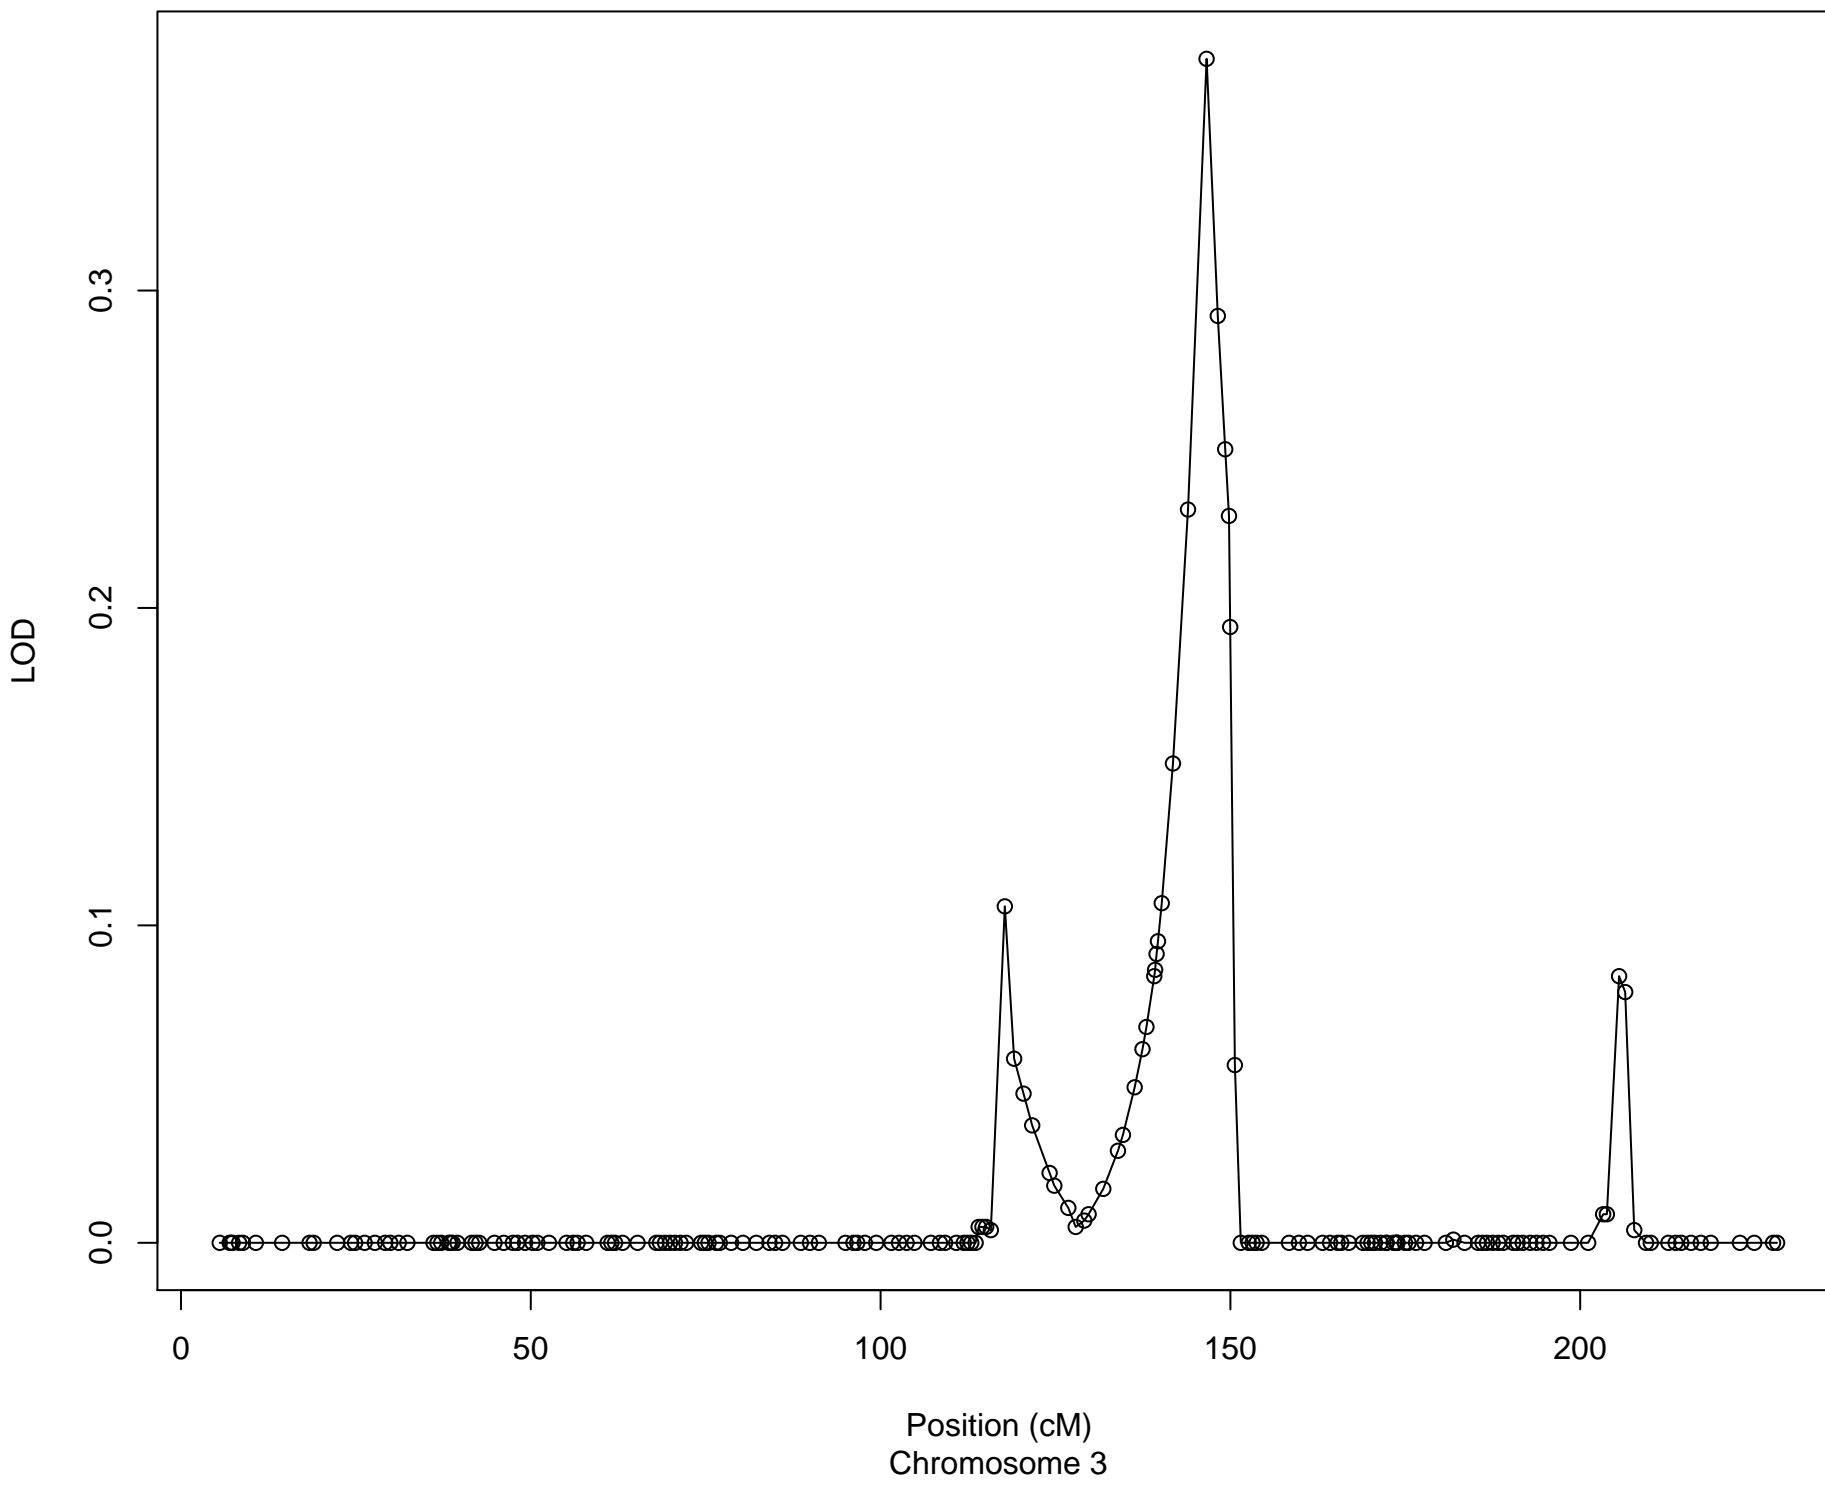

# IC50 (9-aminocamptothecin) (IC50\_9AC)

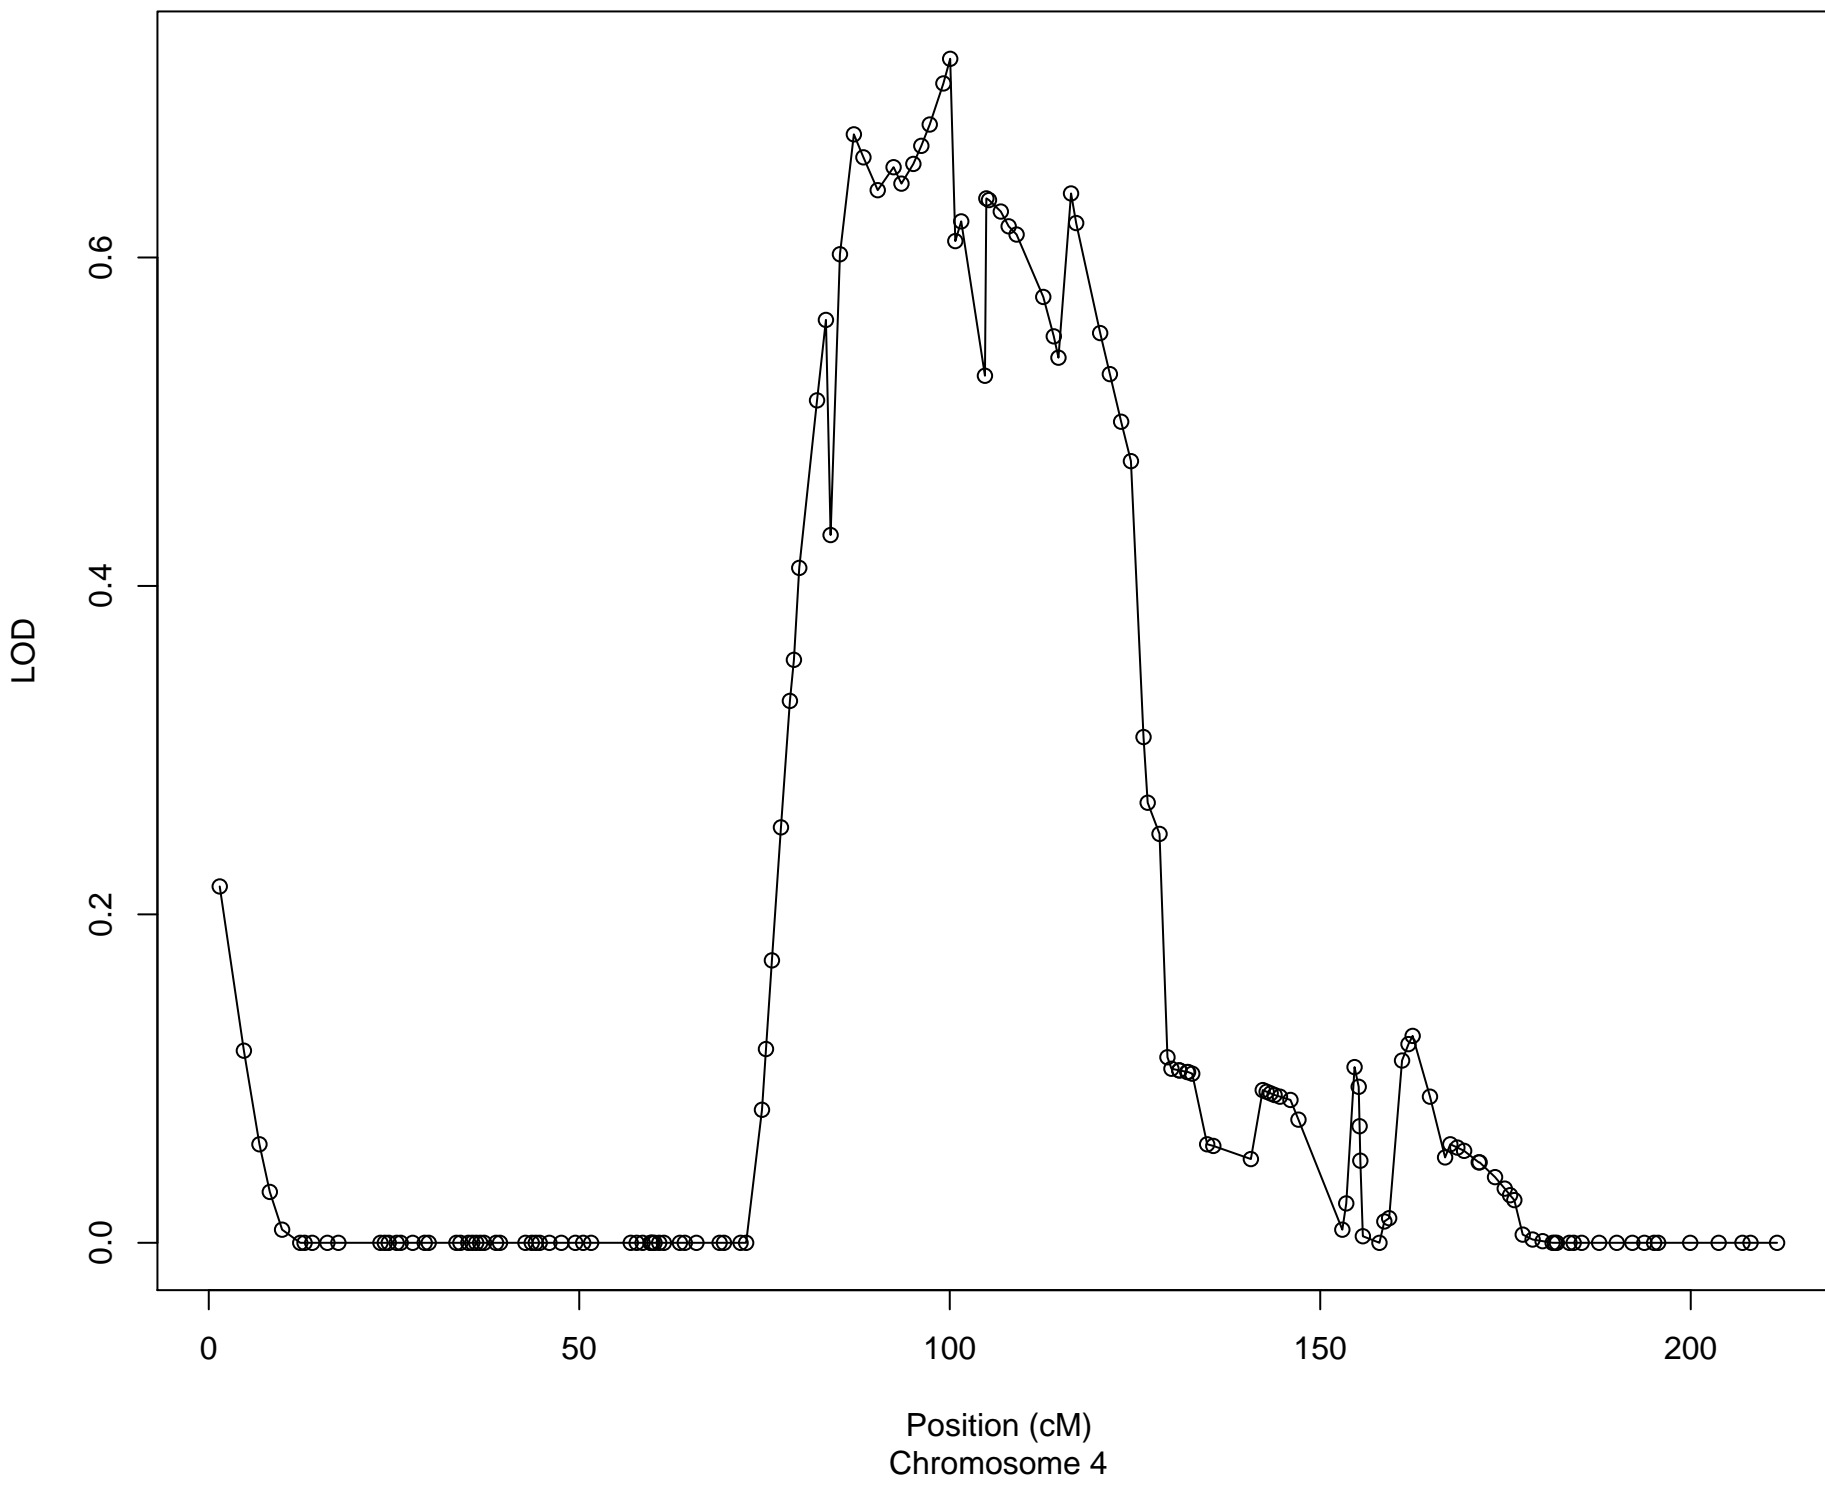

# IC50 (9-aminocamptothecin) (IC50\_9AC)

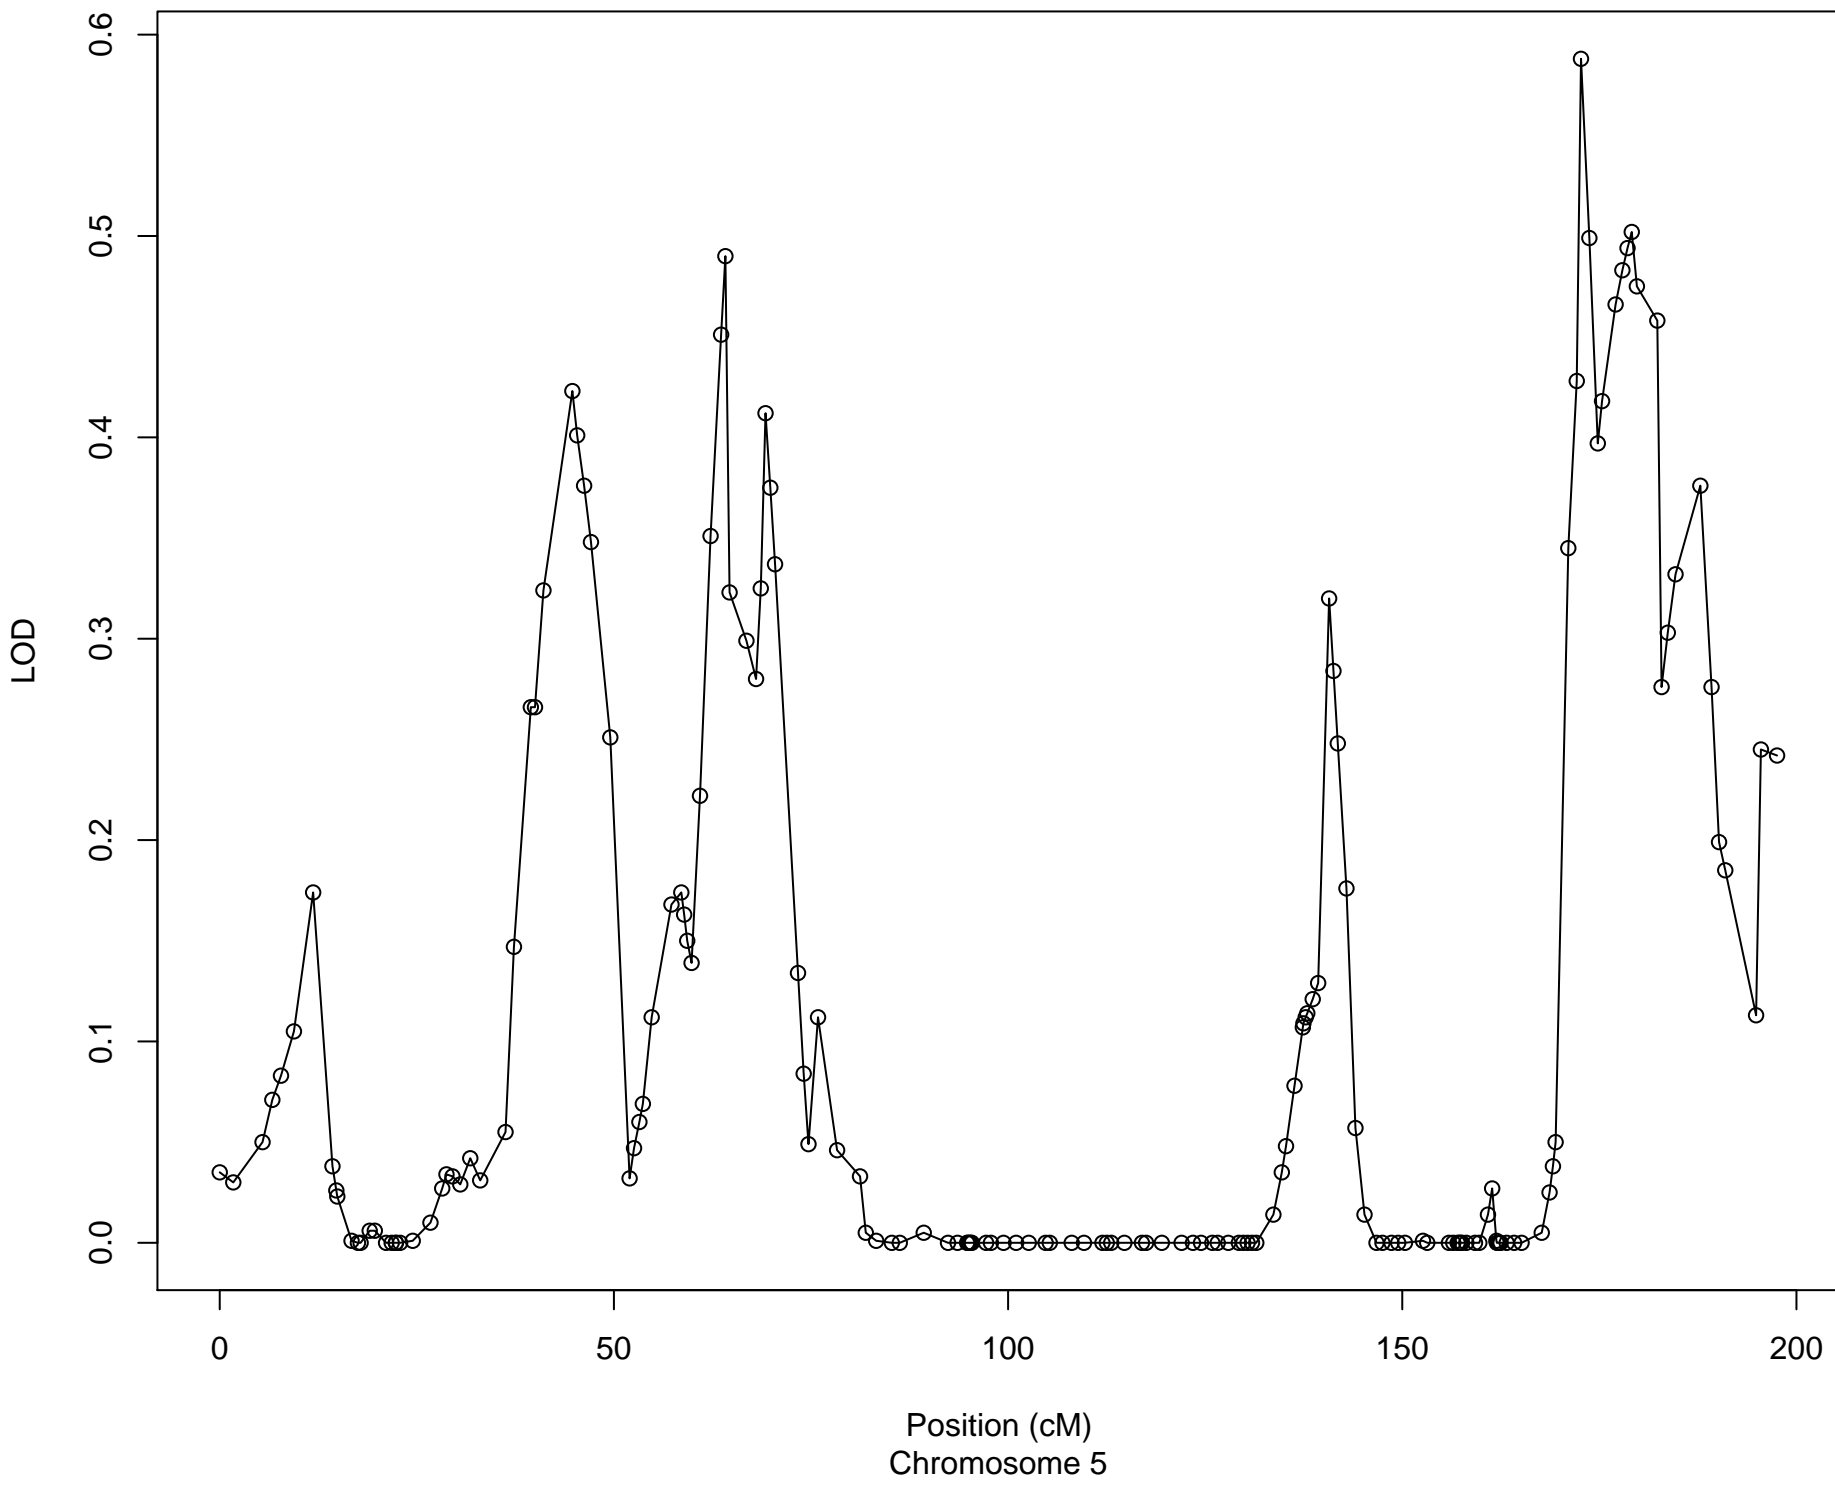

# IC50 (9-aminocamptothecin) (IC50\_9AC)

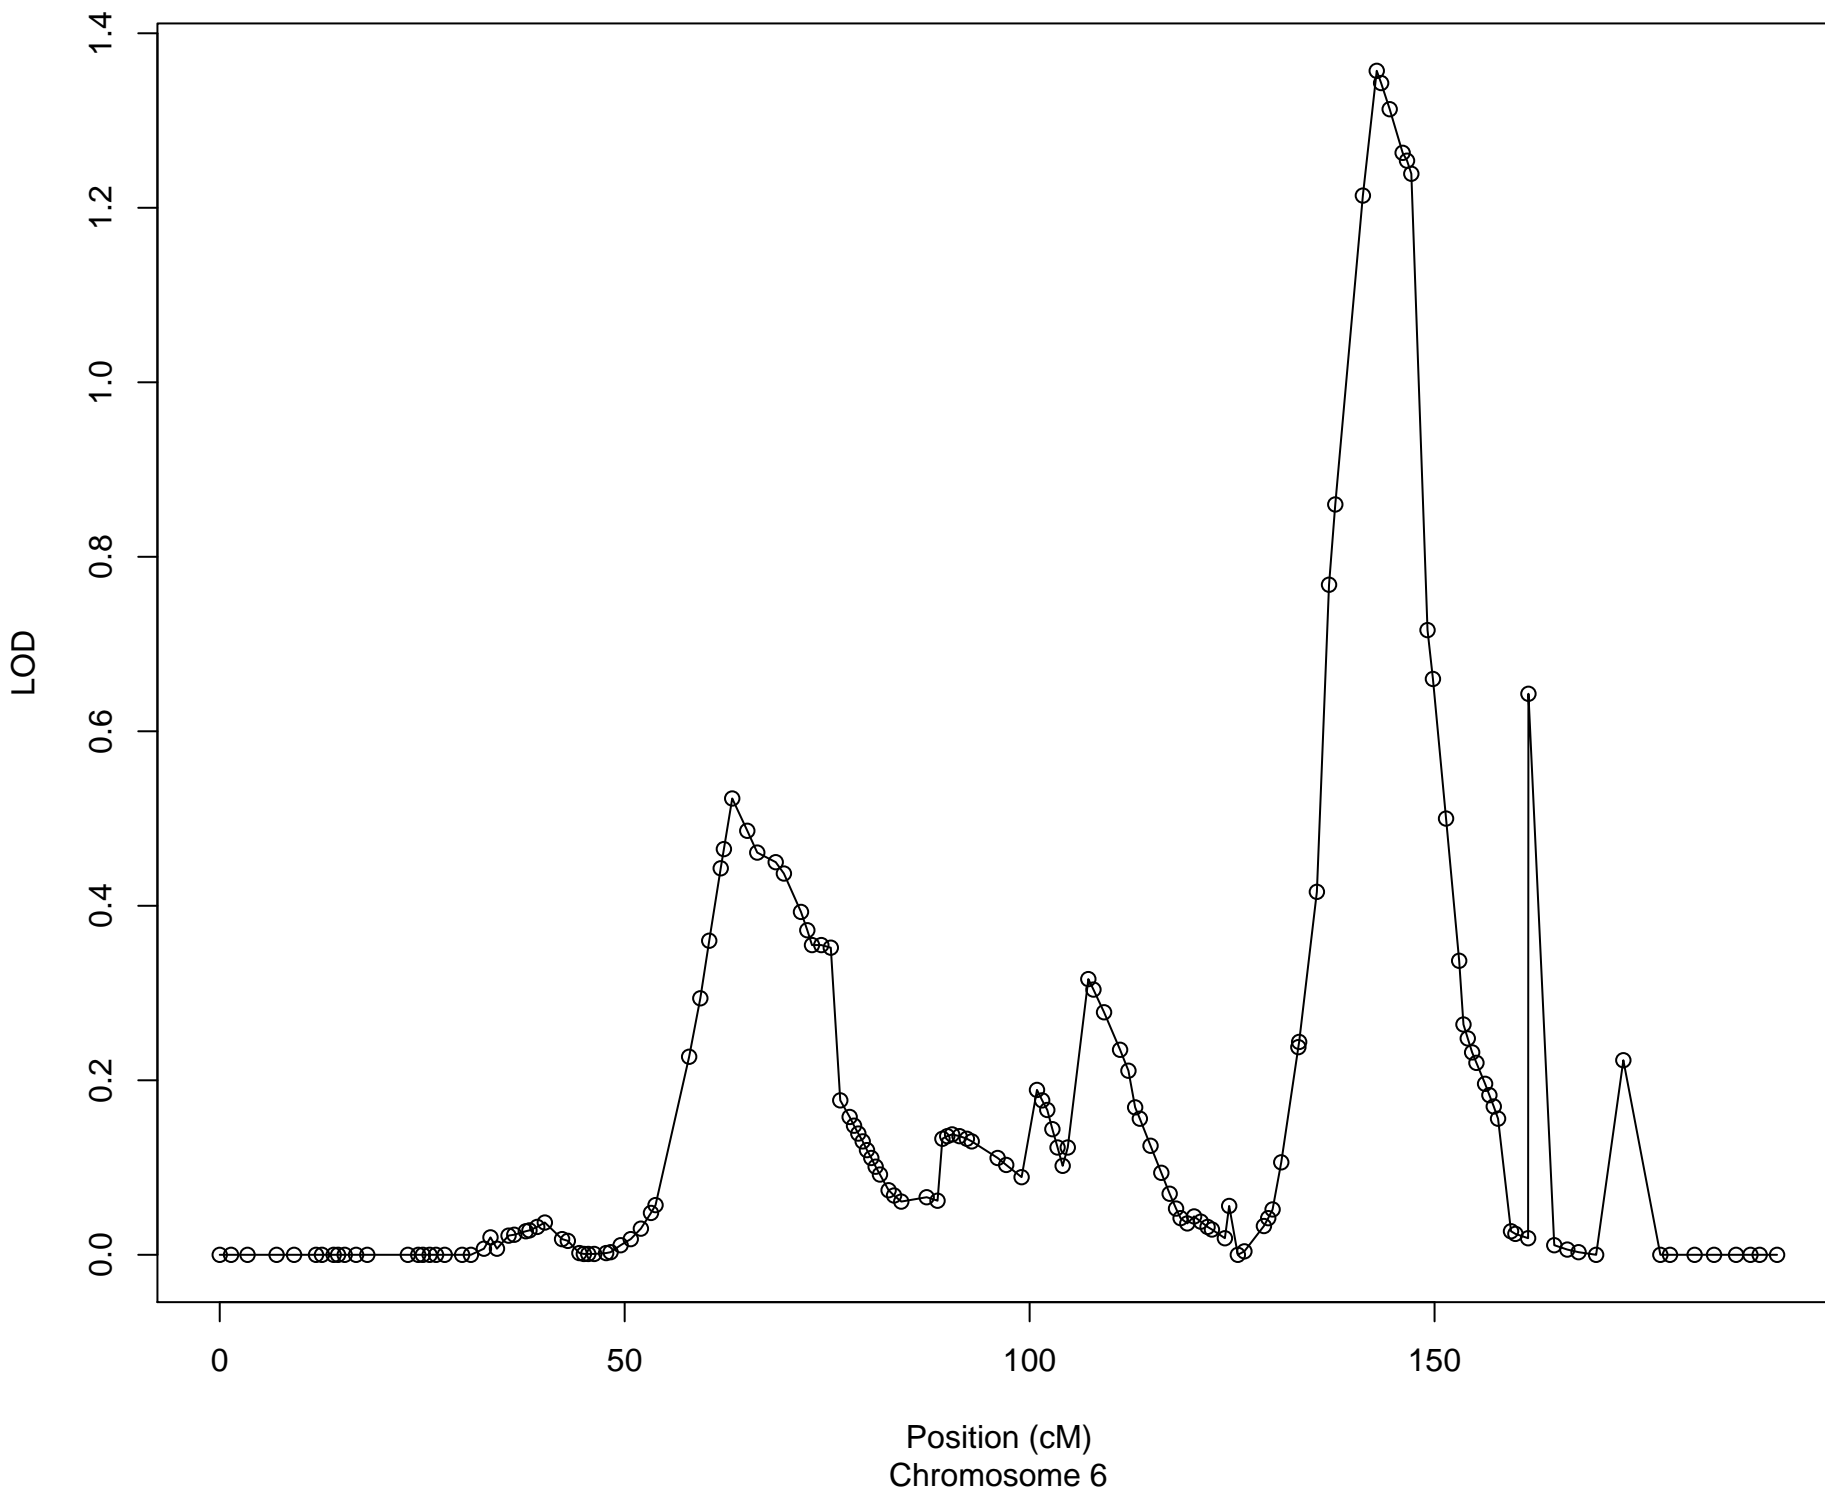

# IC50 (9-aminocamptothecin) (IC50\_9AC)

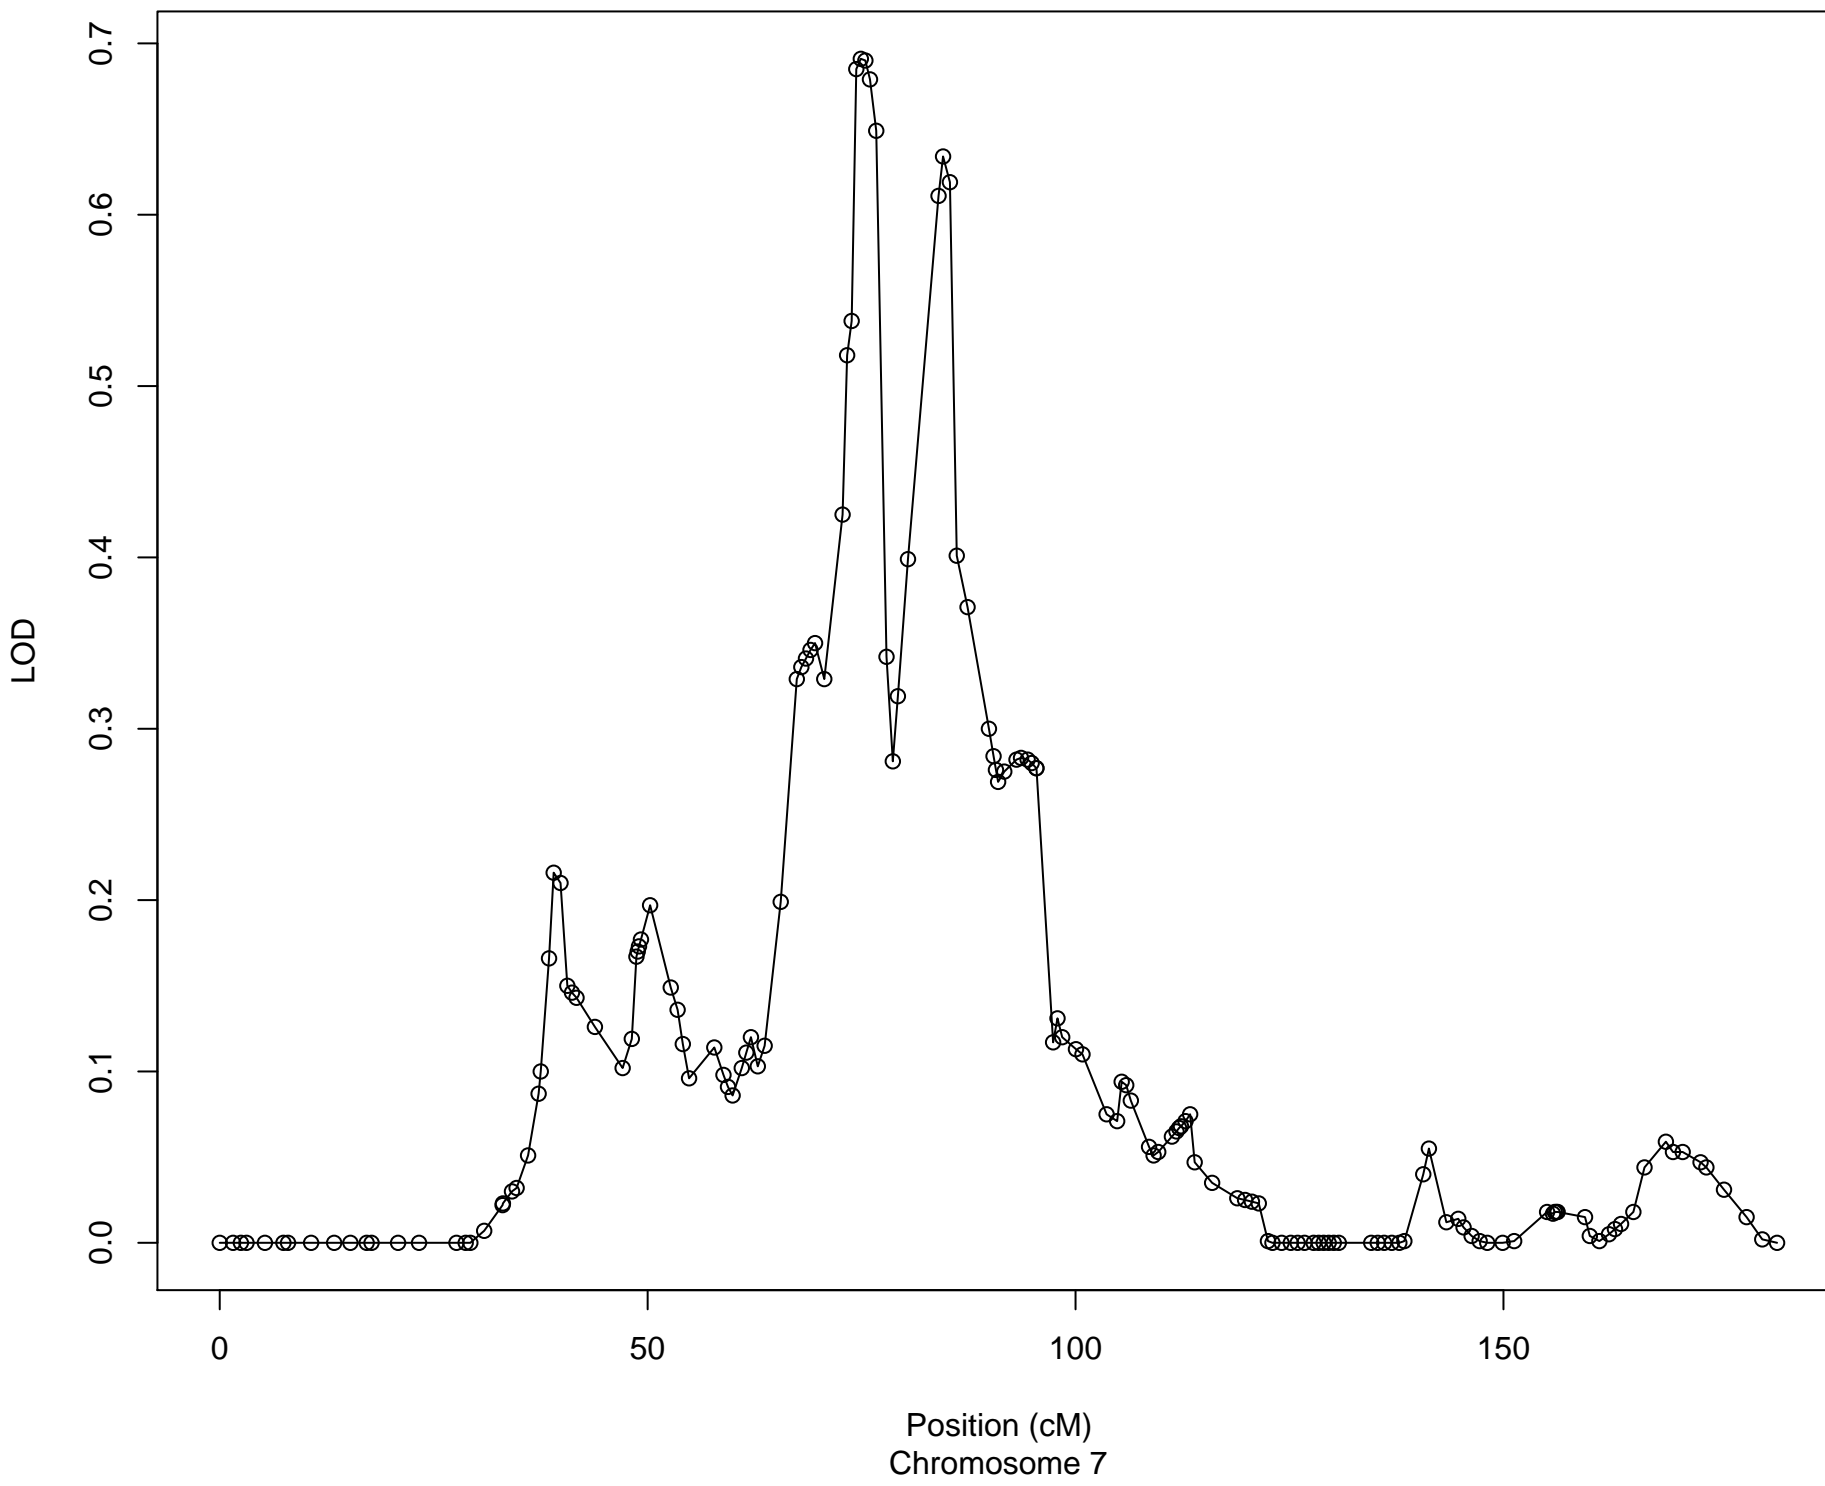

# IC50 (9-aminocamptothecin) (IC50\_9AC)

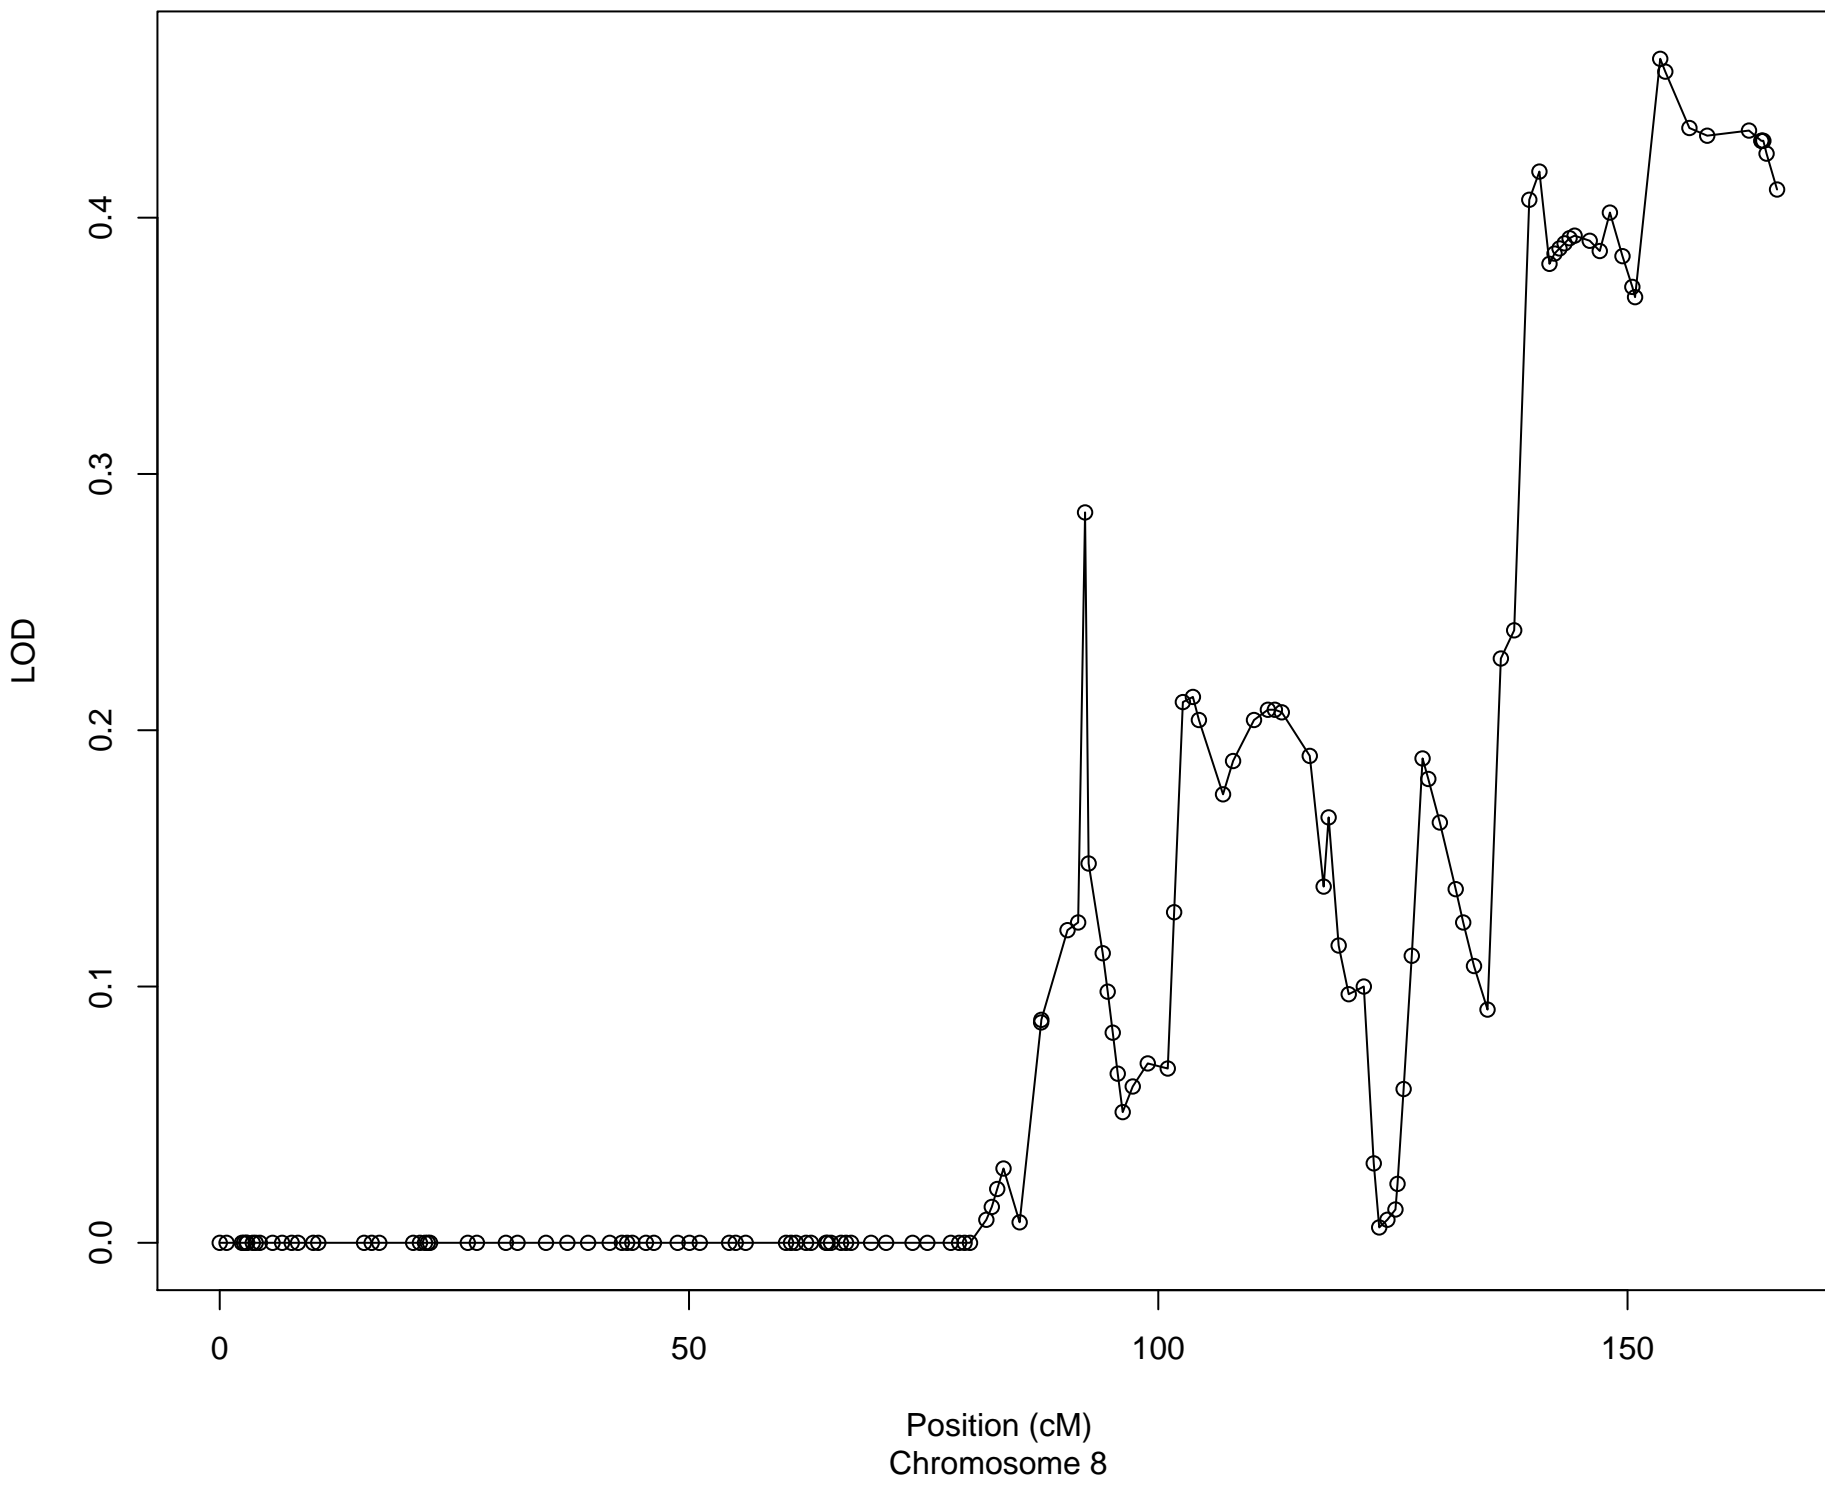

# IC50 (9-aminocamptothecin) (IC50\_9AC)

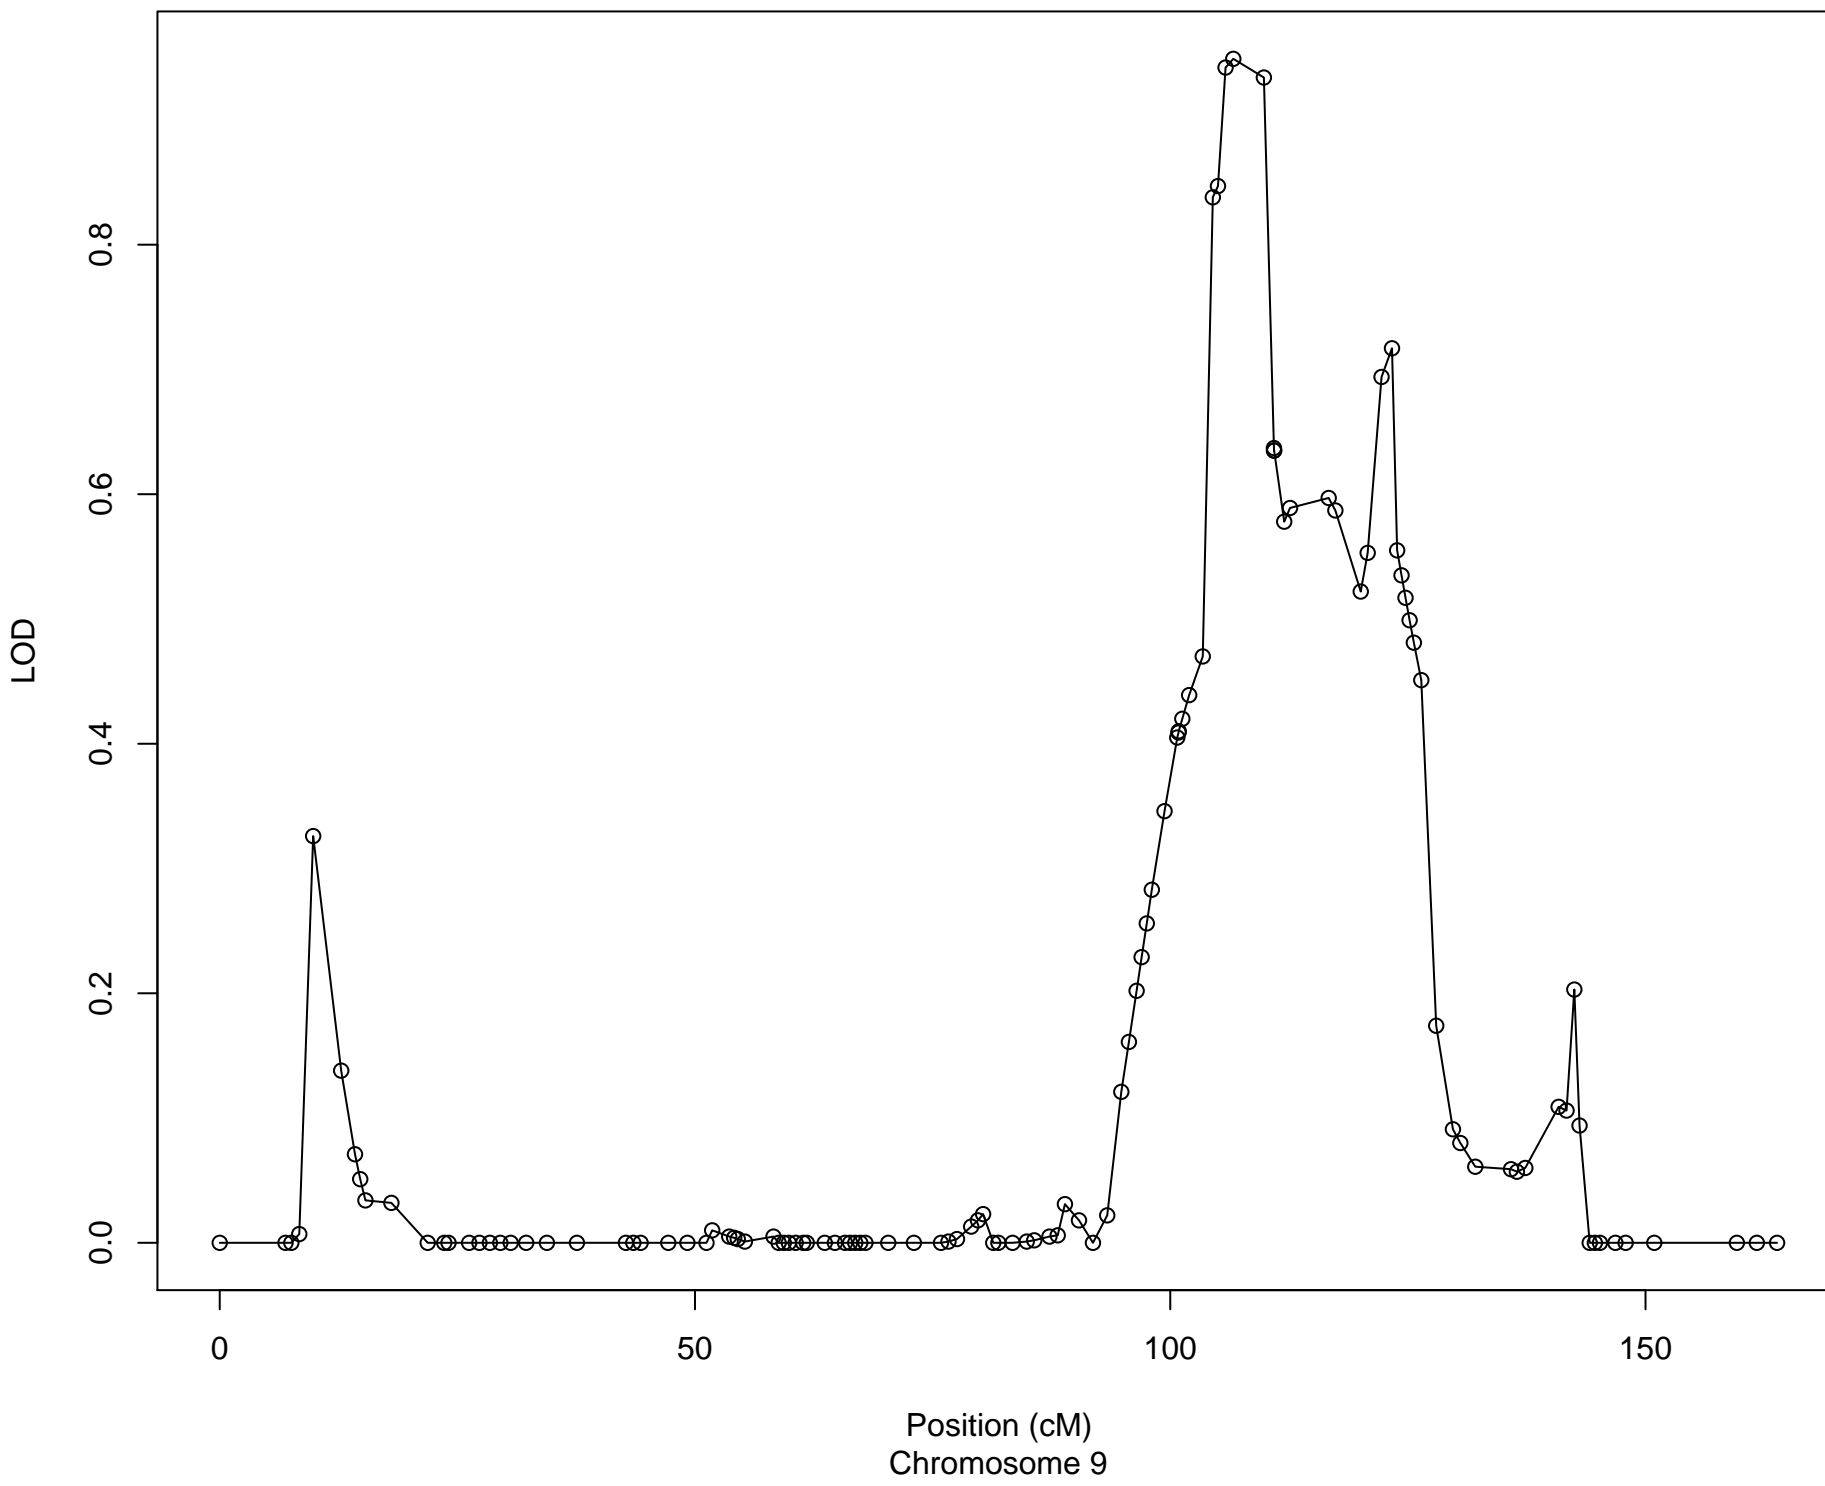

# IC50 (9-aminocamptothecin) (IC50\_9AC)

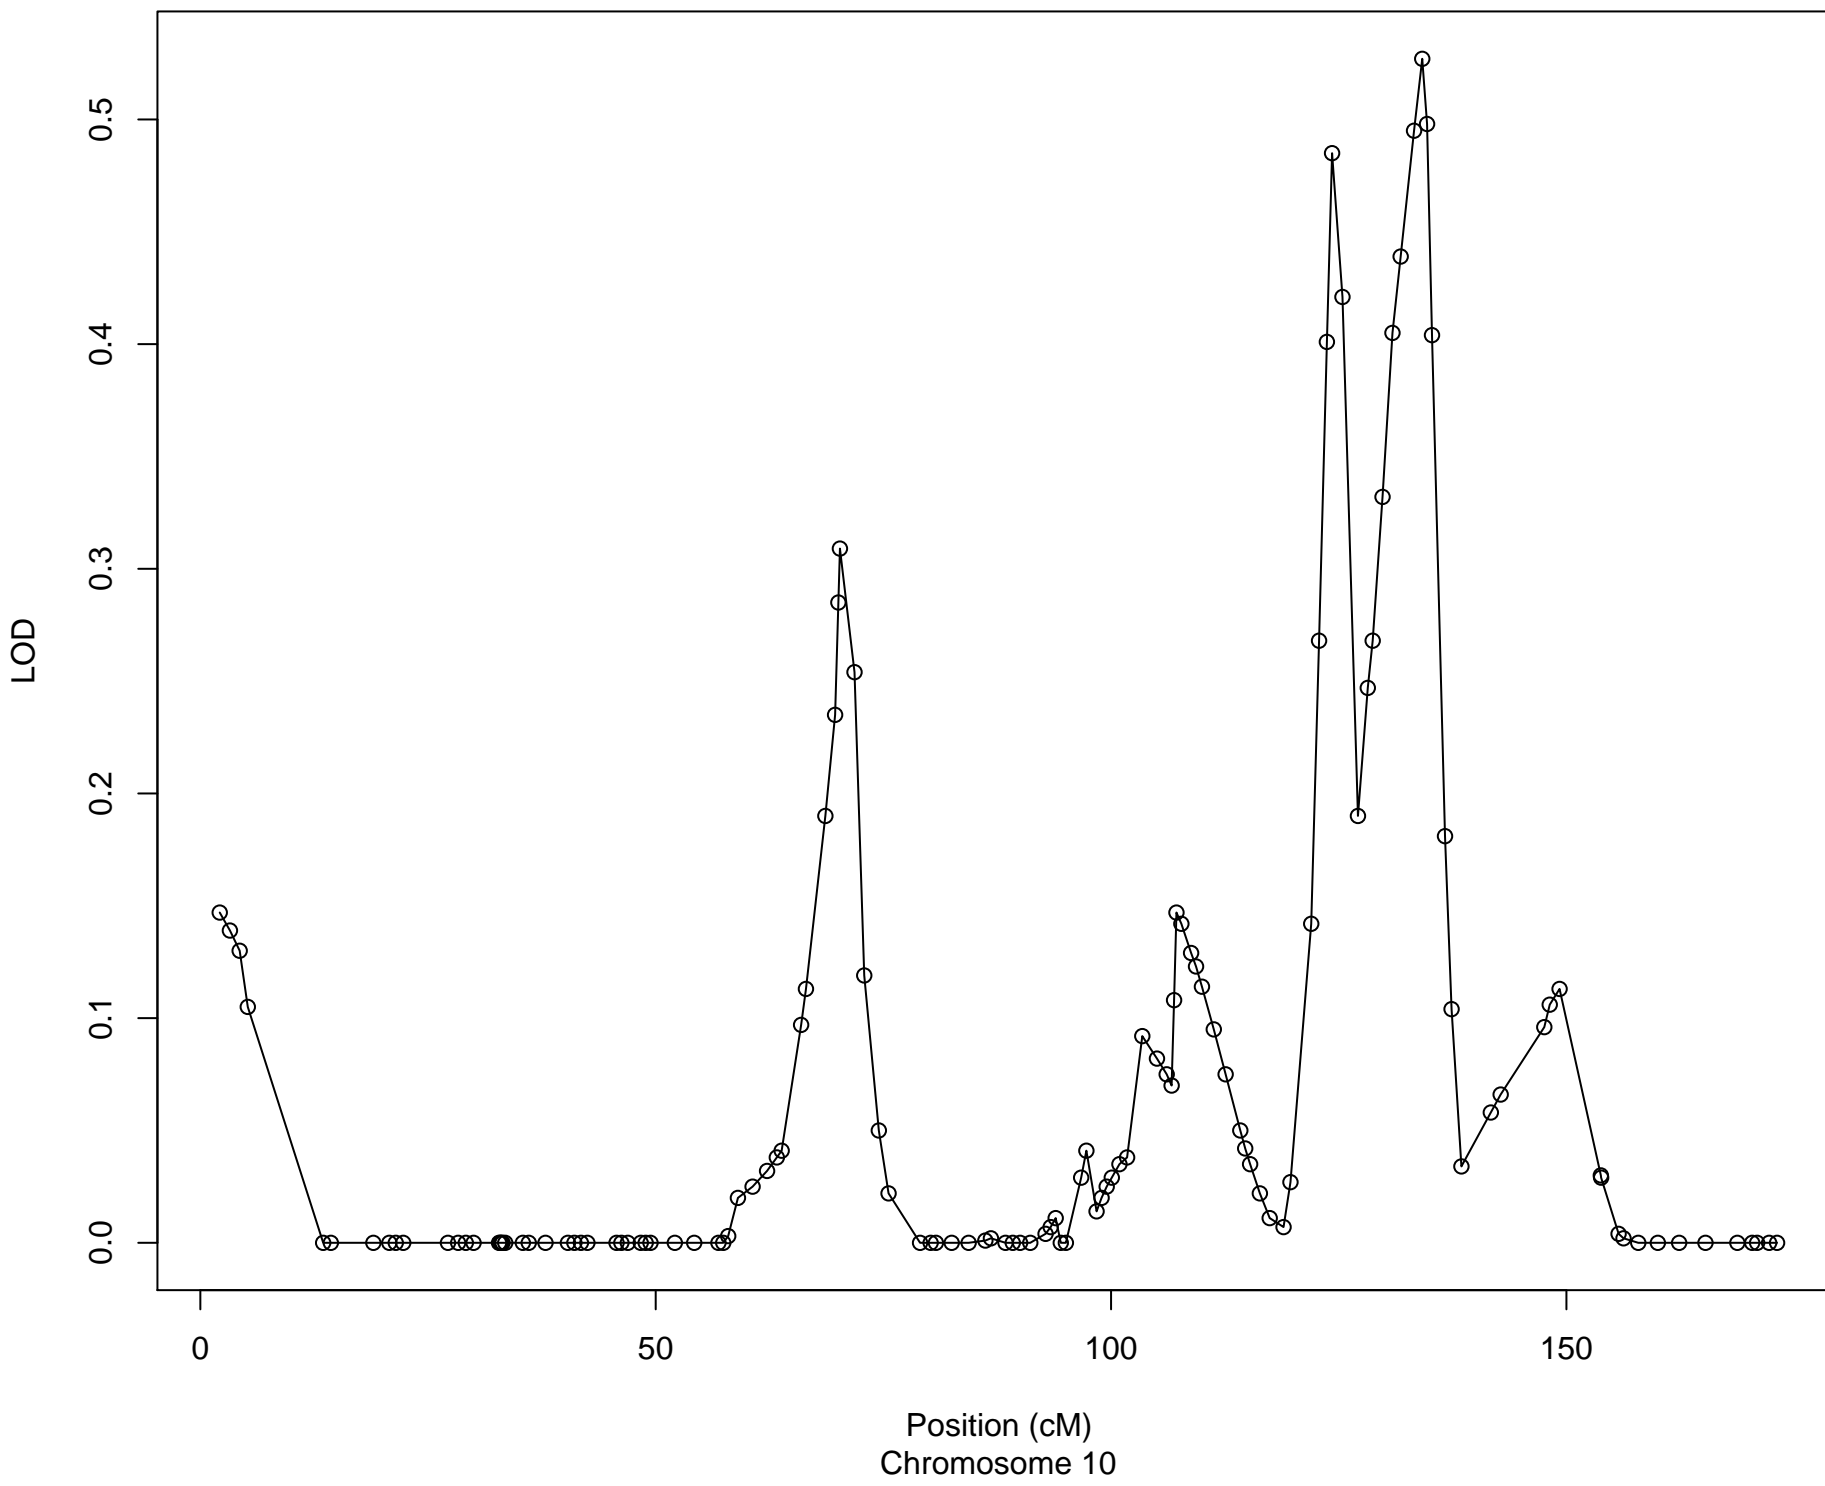



# IC50 (9-aminocamptothecin) (IC50\_9AC)

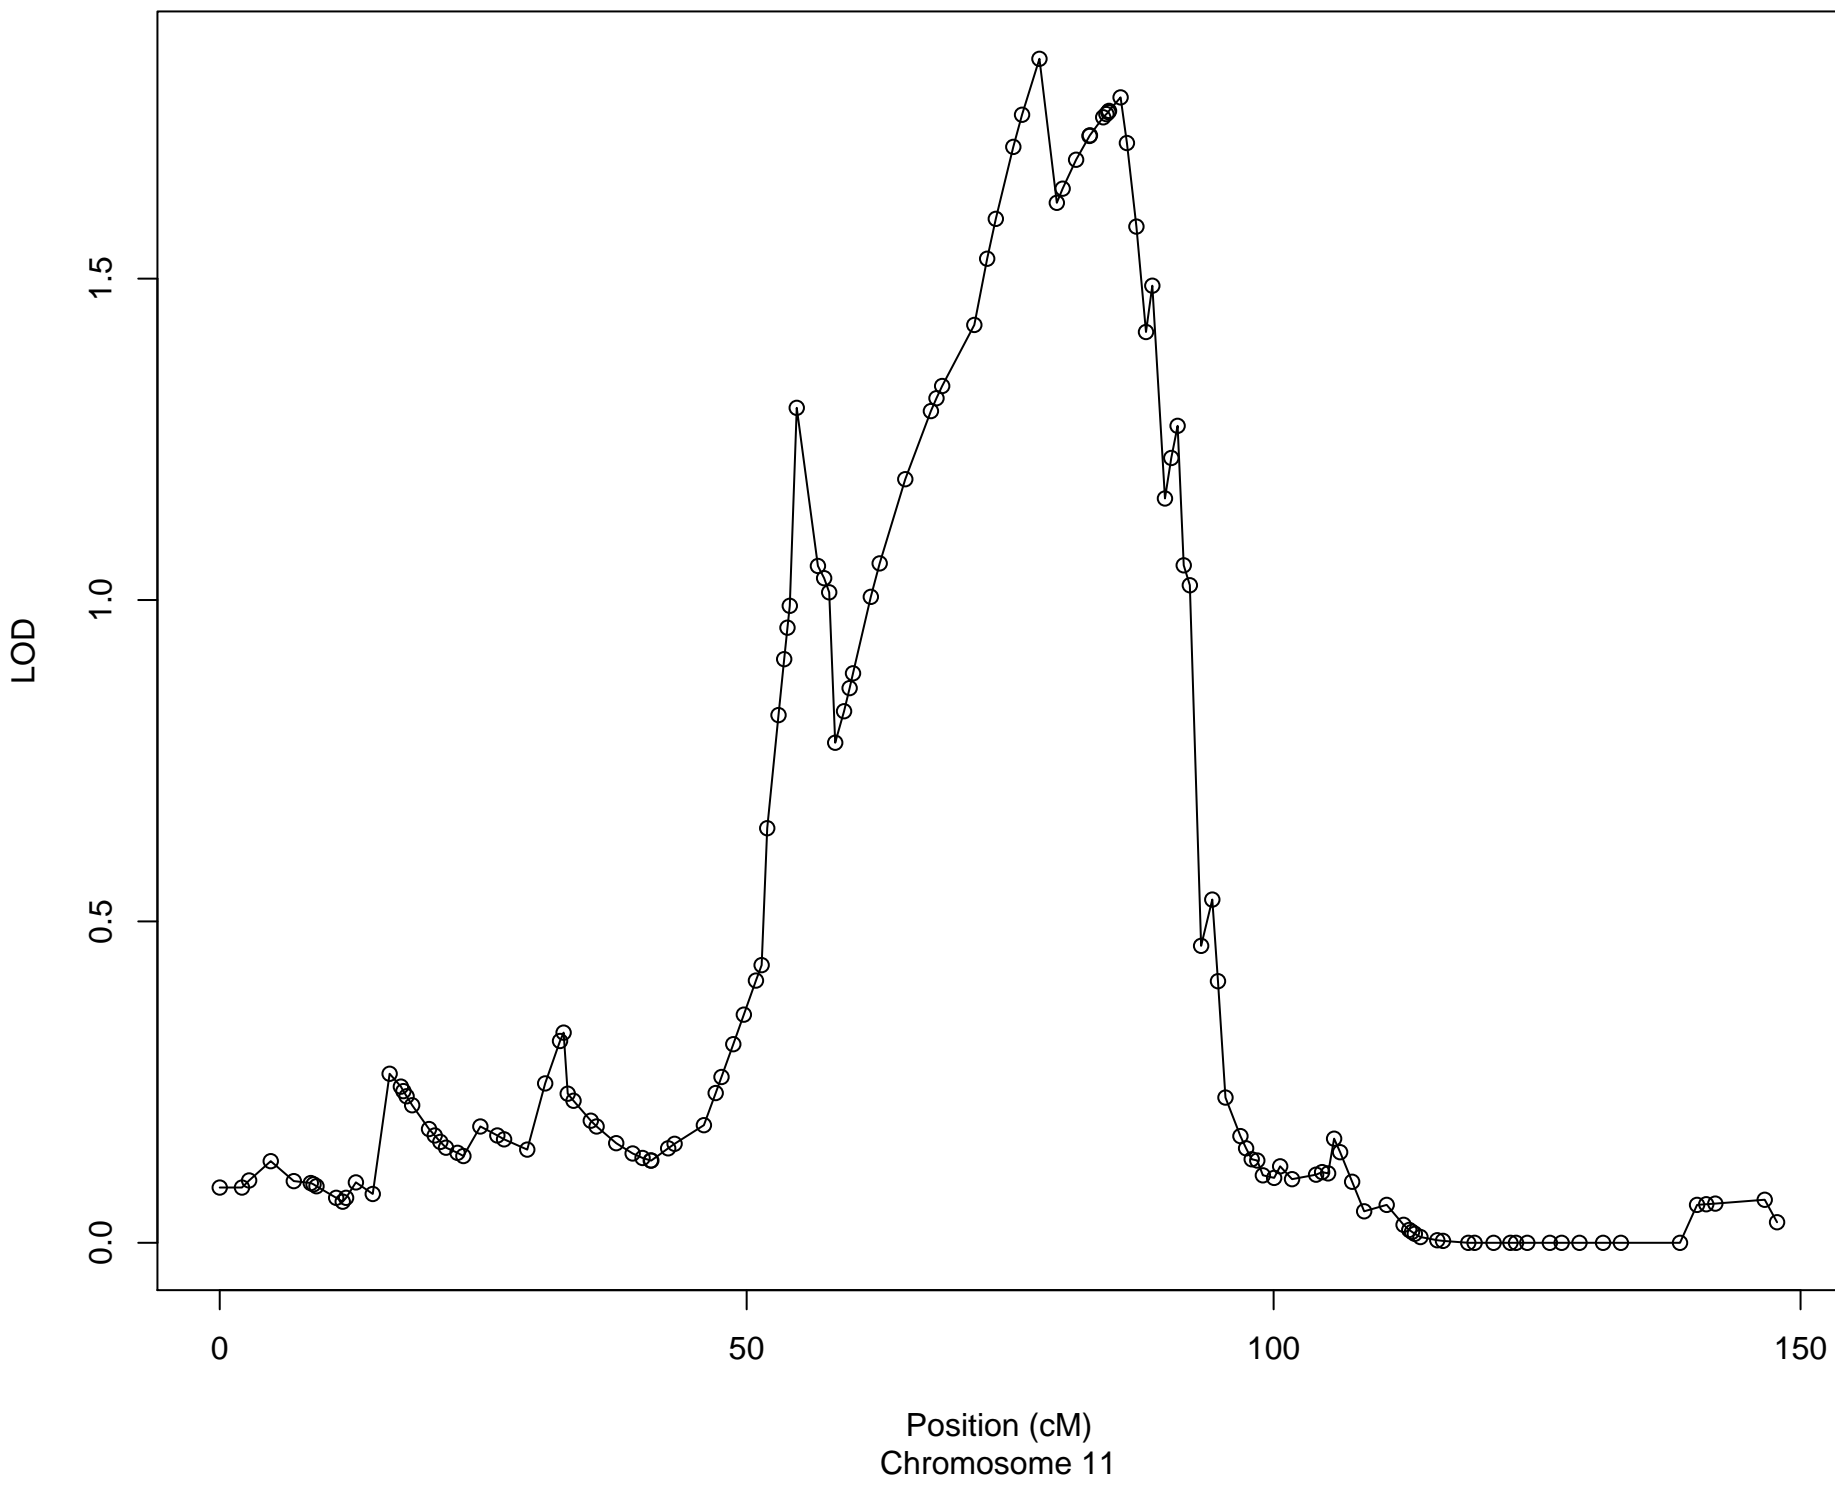

# IC50 (9-aminocamptothecin) (IC50\_9AC)

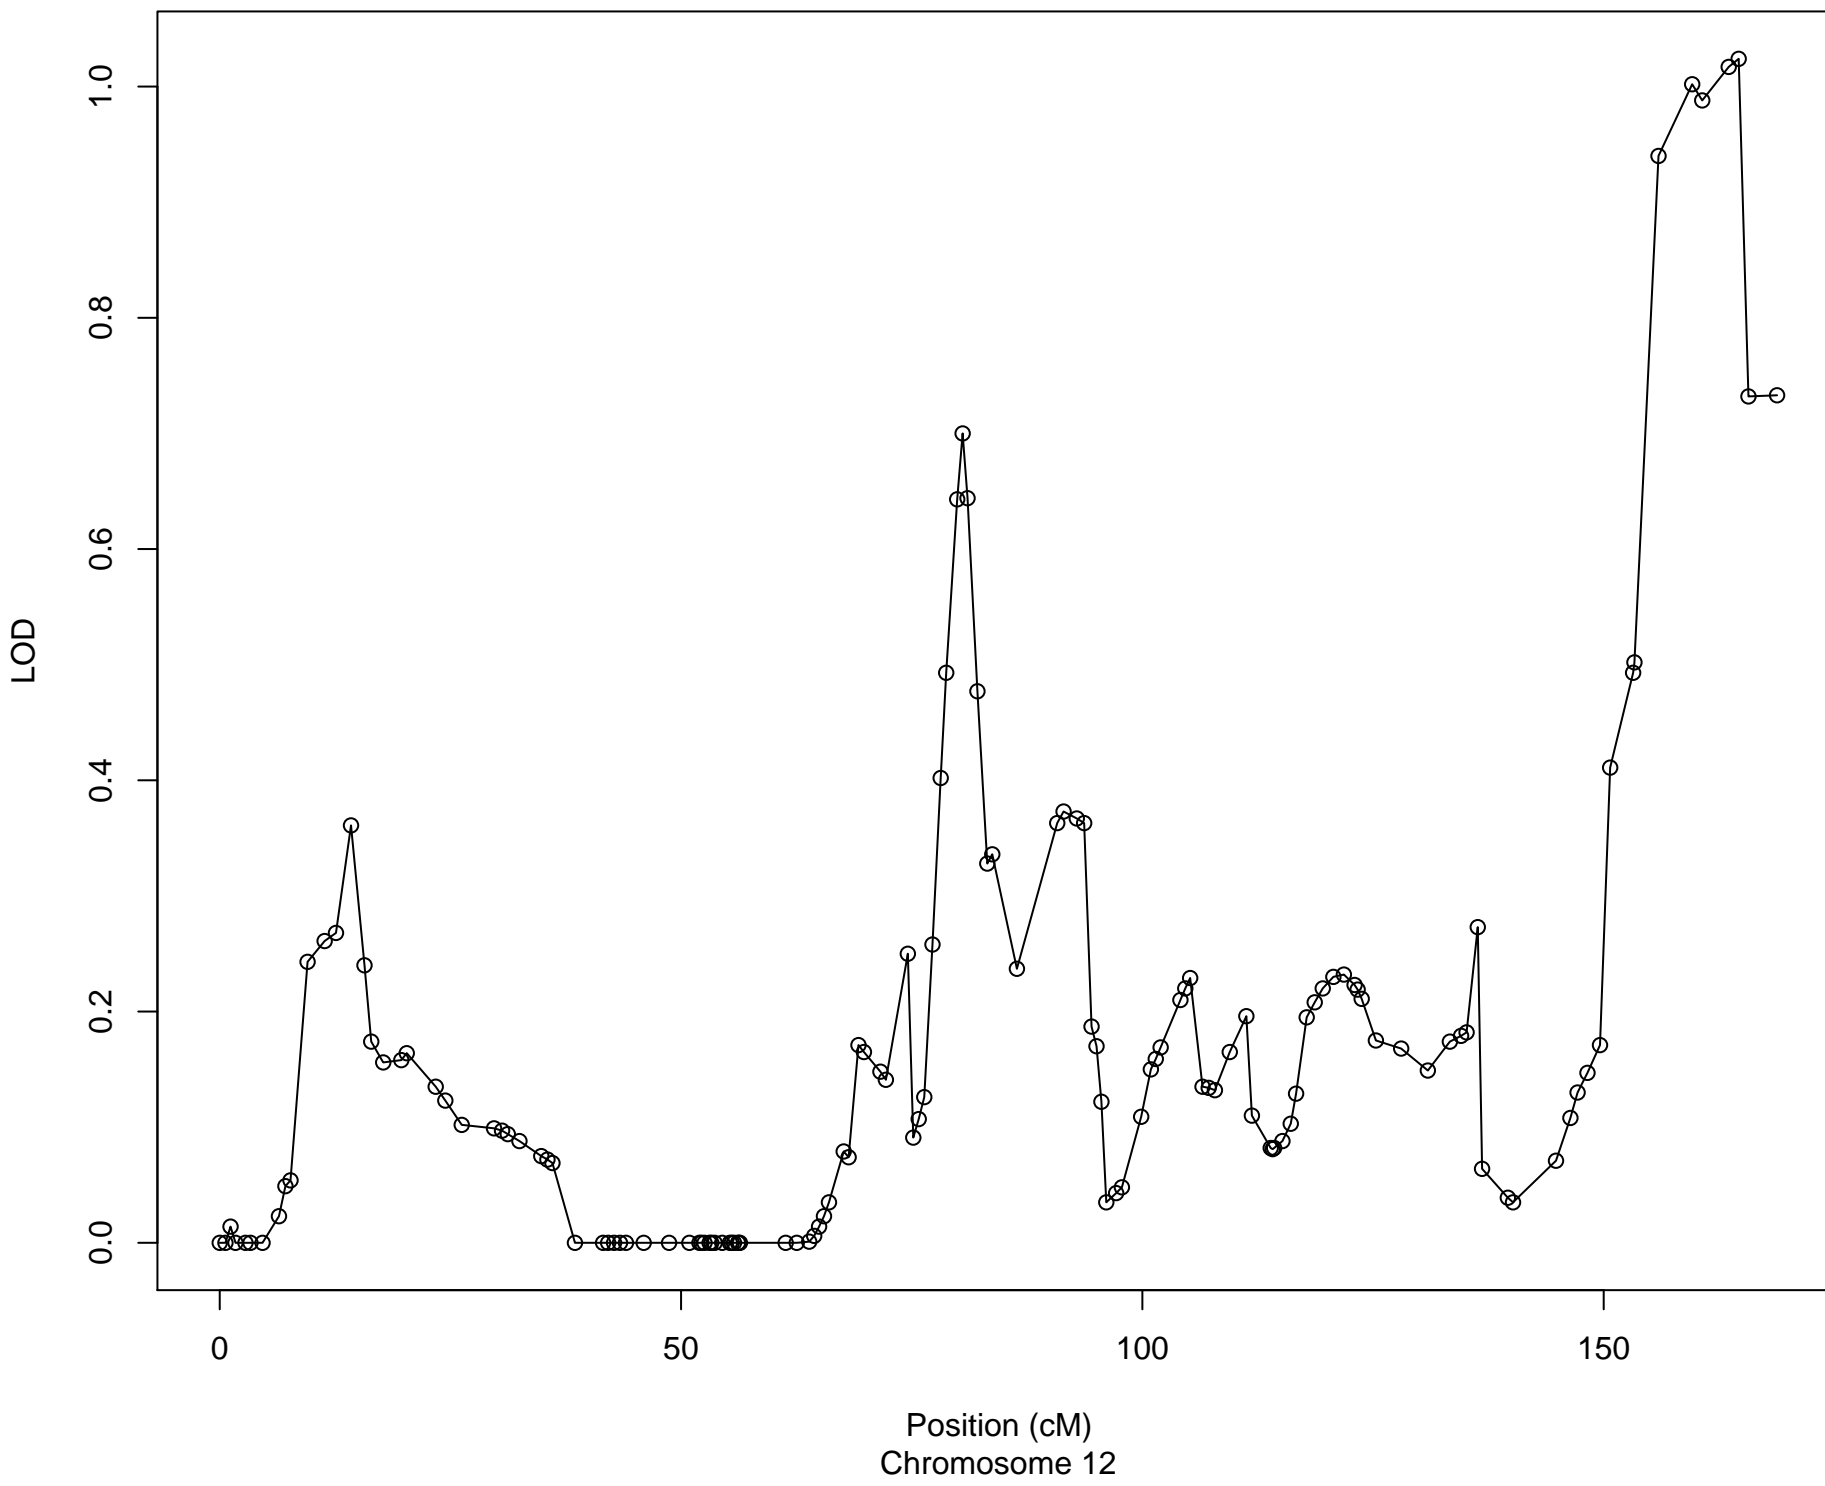

# IC50 (9-aminocamptothecin) (IC50\_9AC)

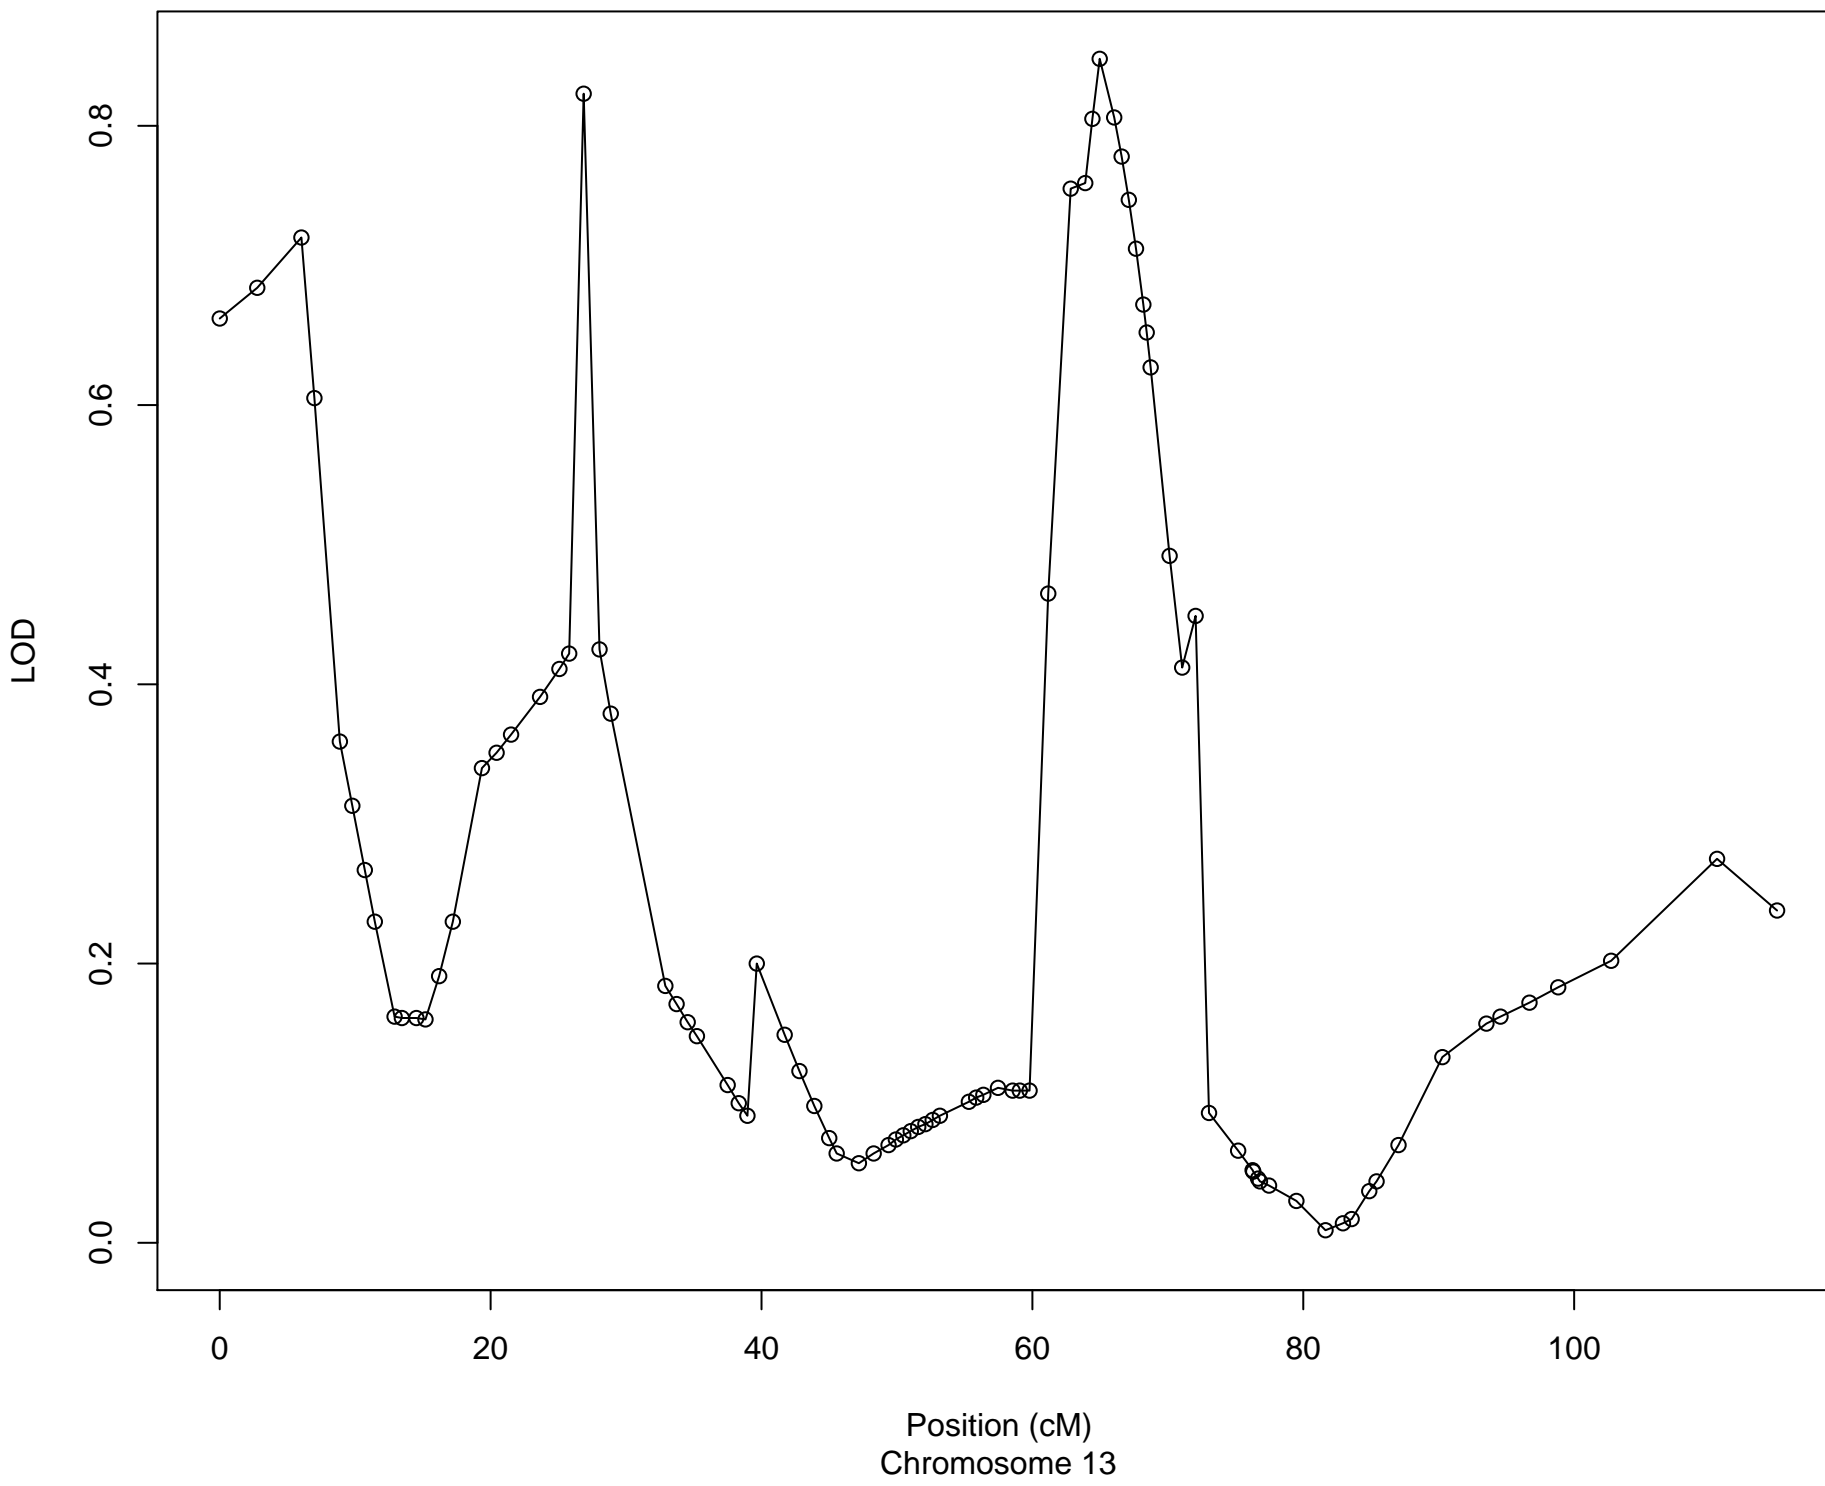

# IC50 (9-aminocamptothecin) (IC50\_9AC)

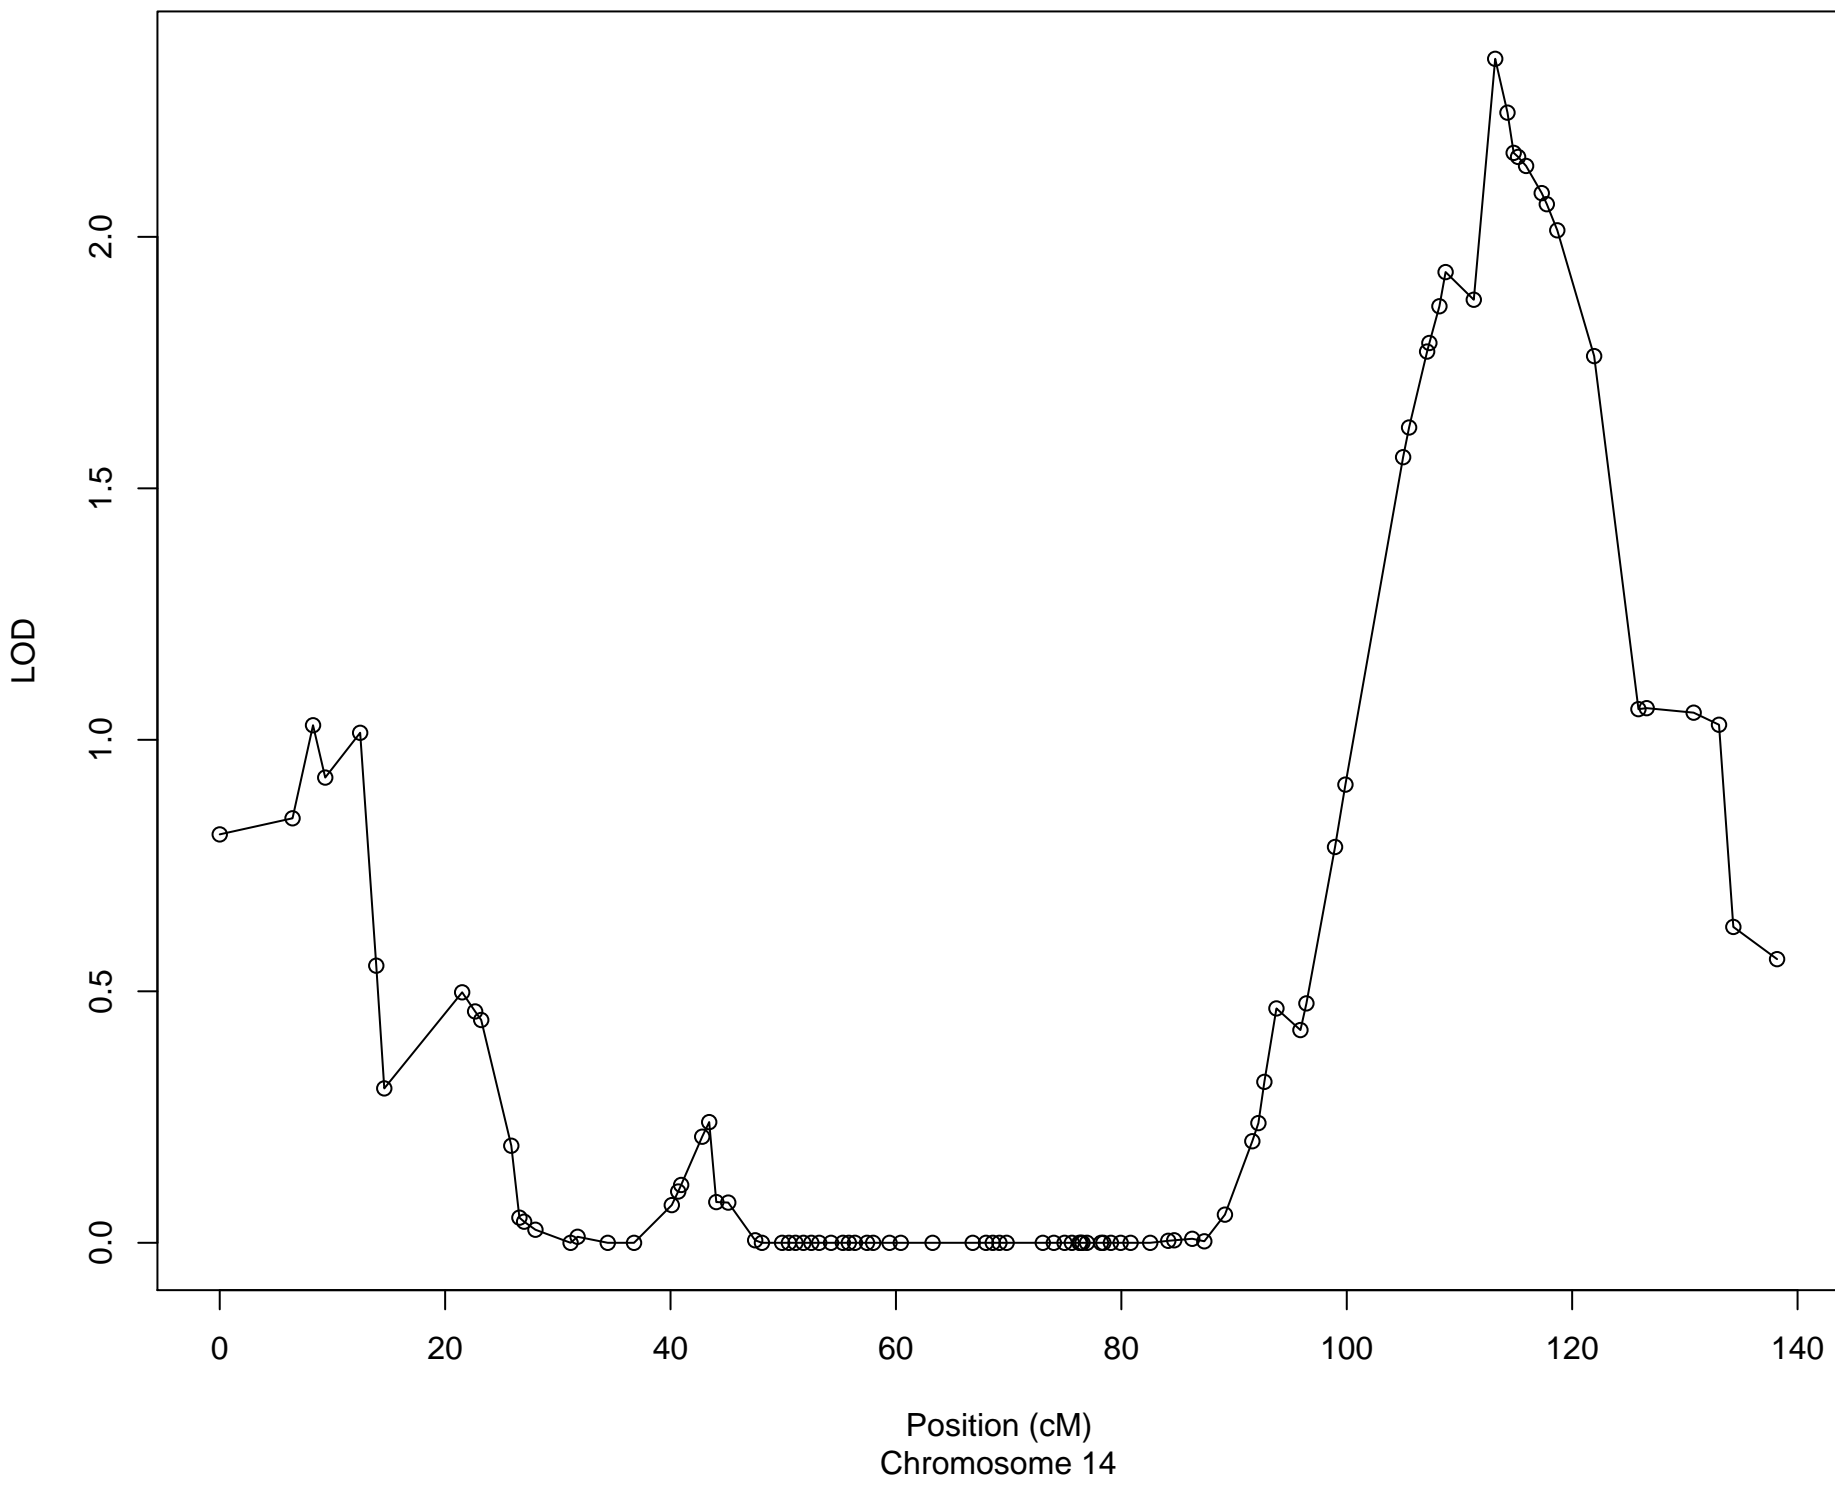

# IC50 (9-aminocamptothecin) (IC50\_9AC)

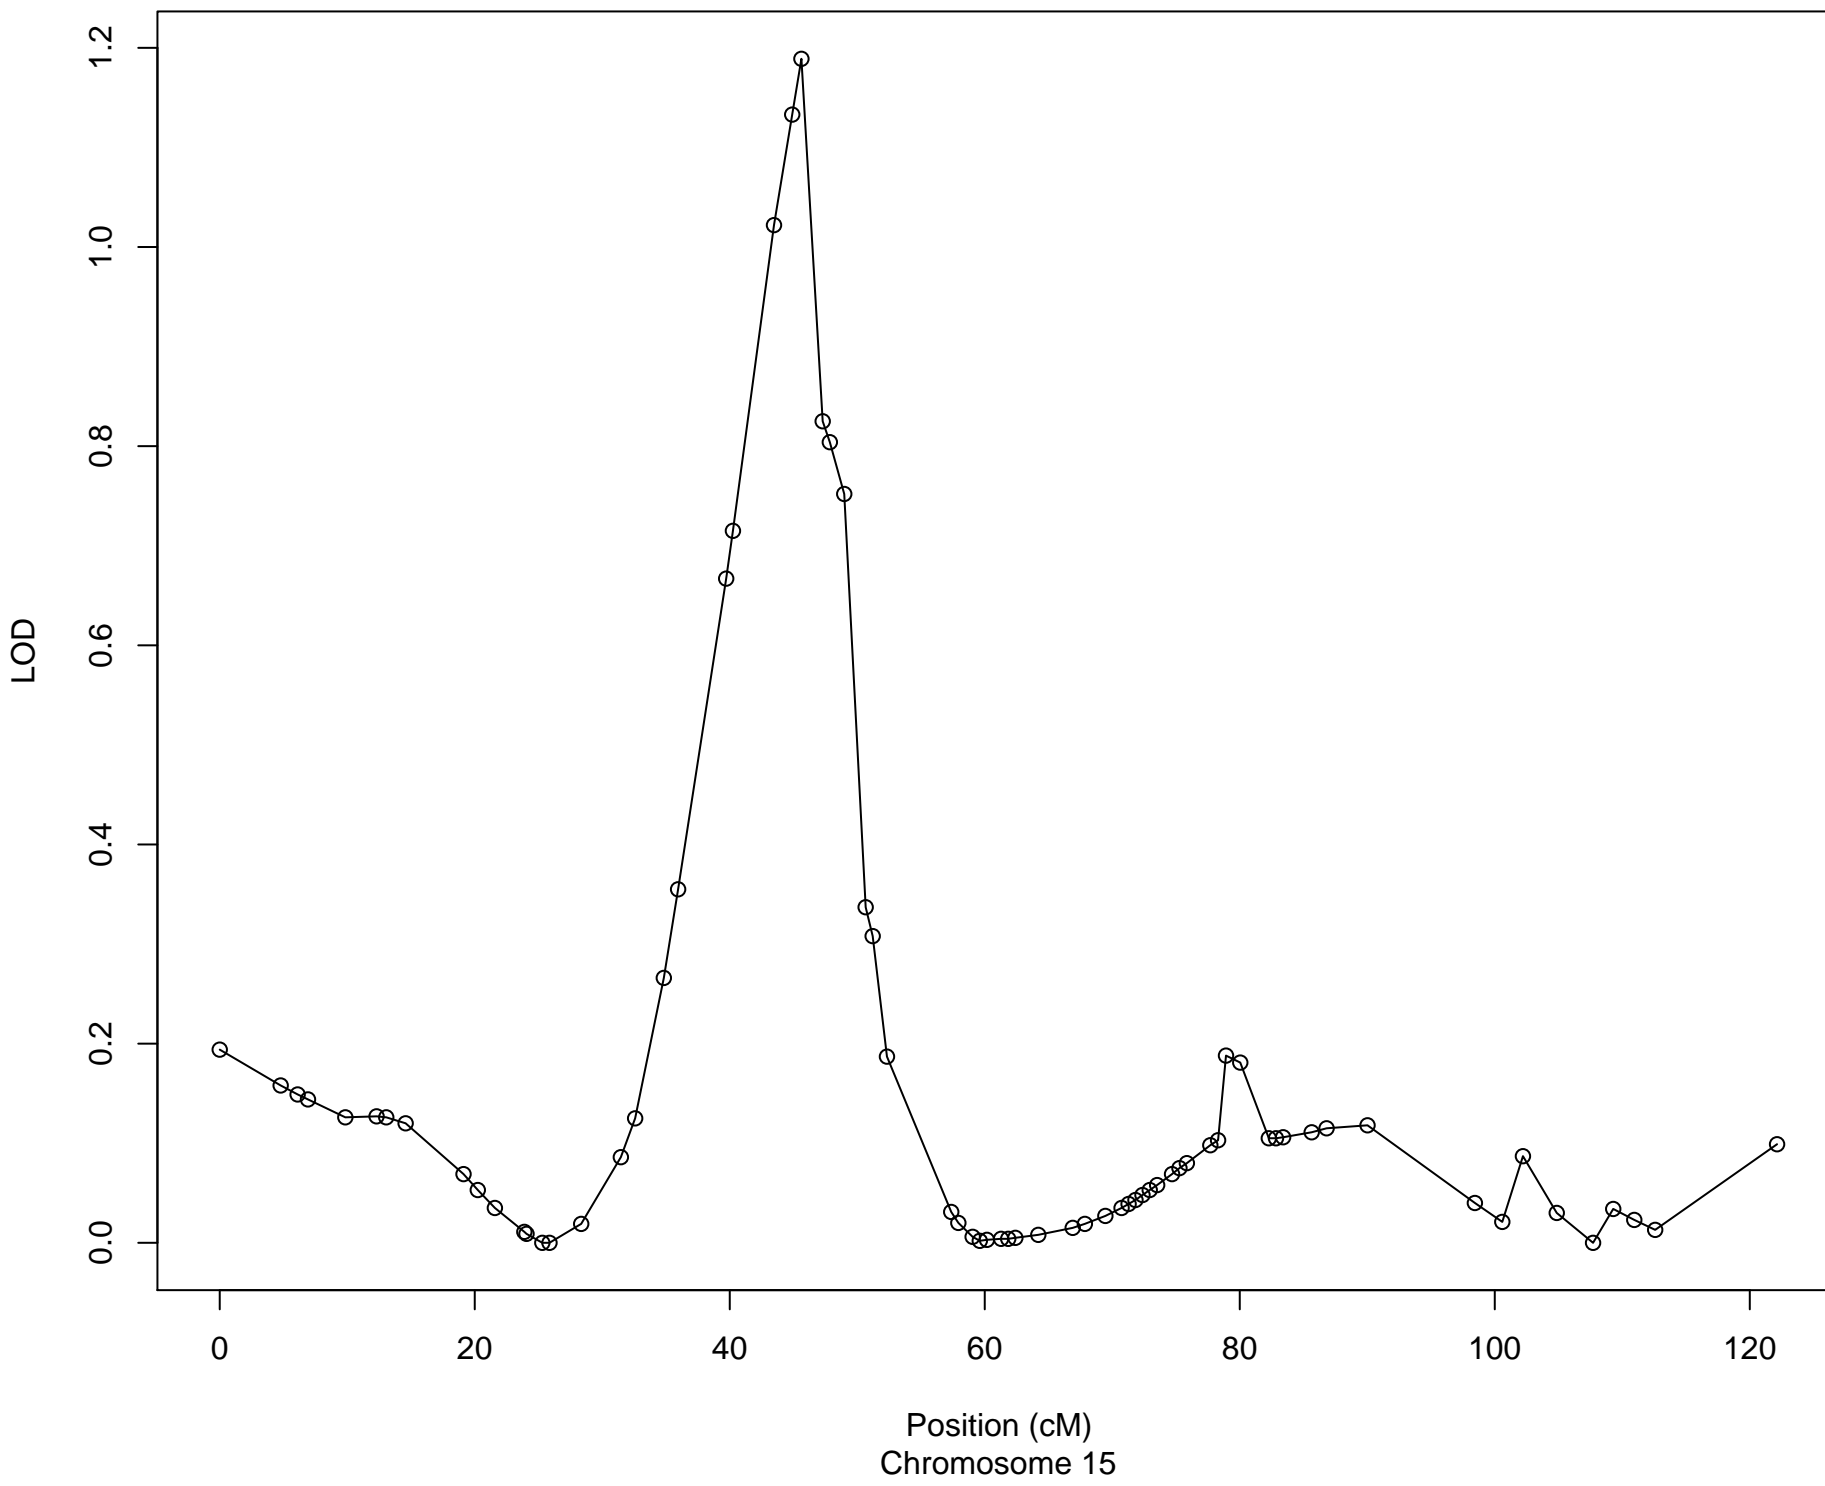

# IC50 (9-aminocamptothecin) (IC50\_9AC)

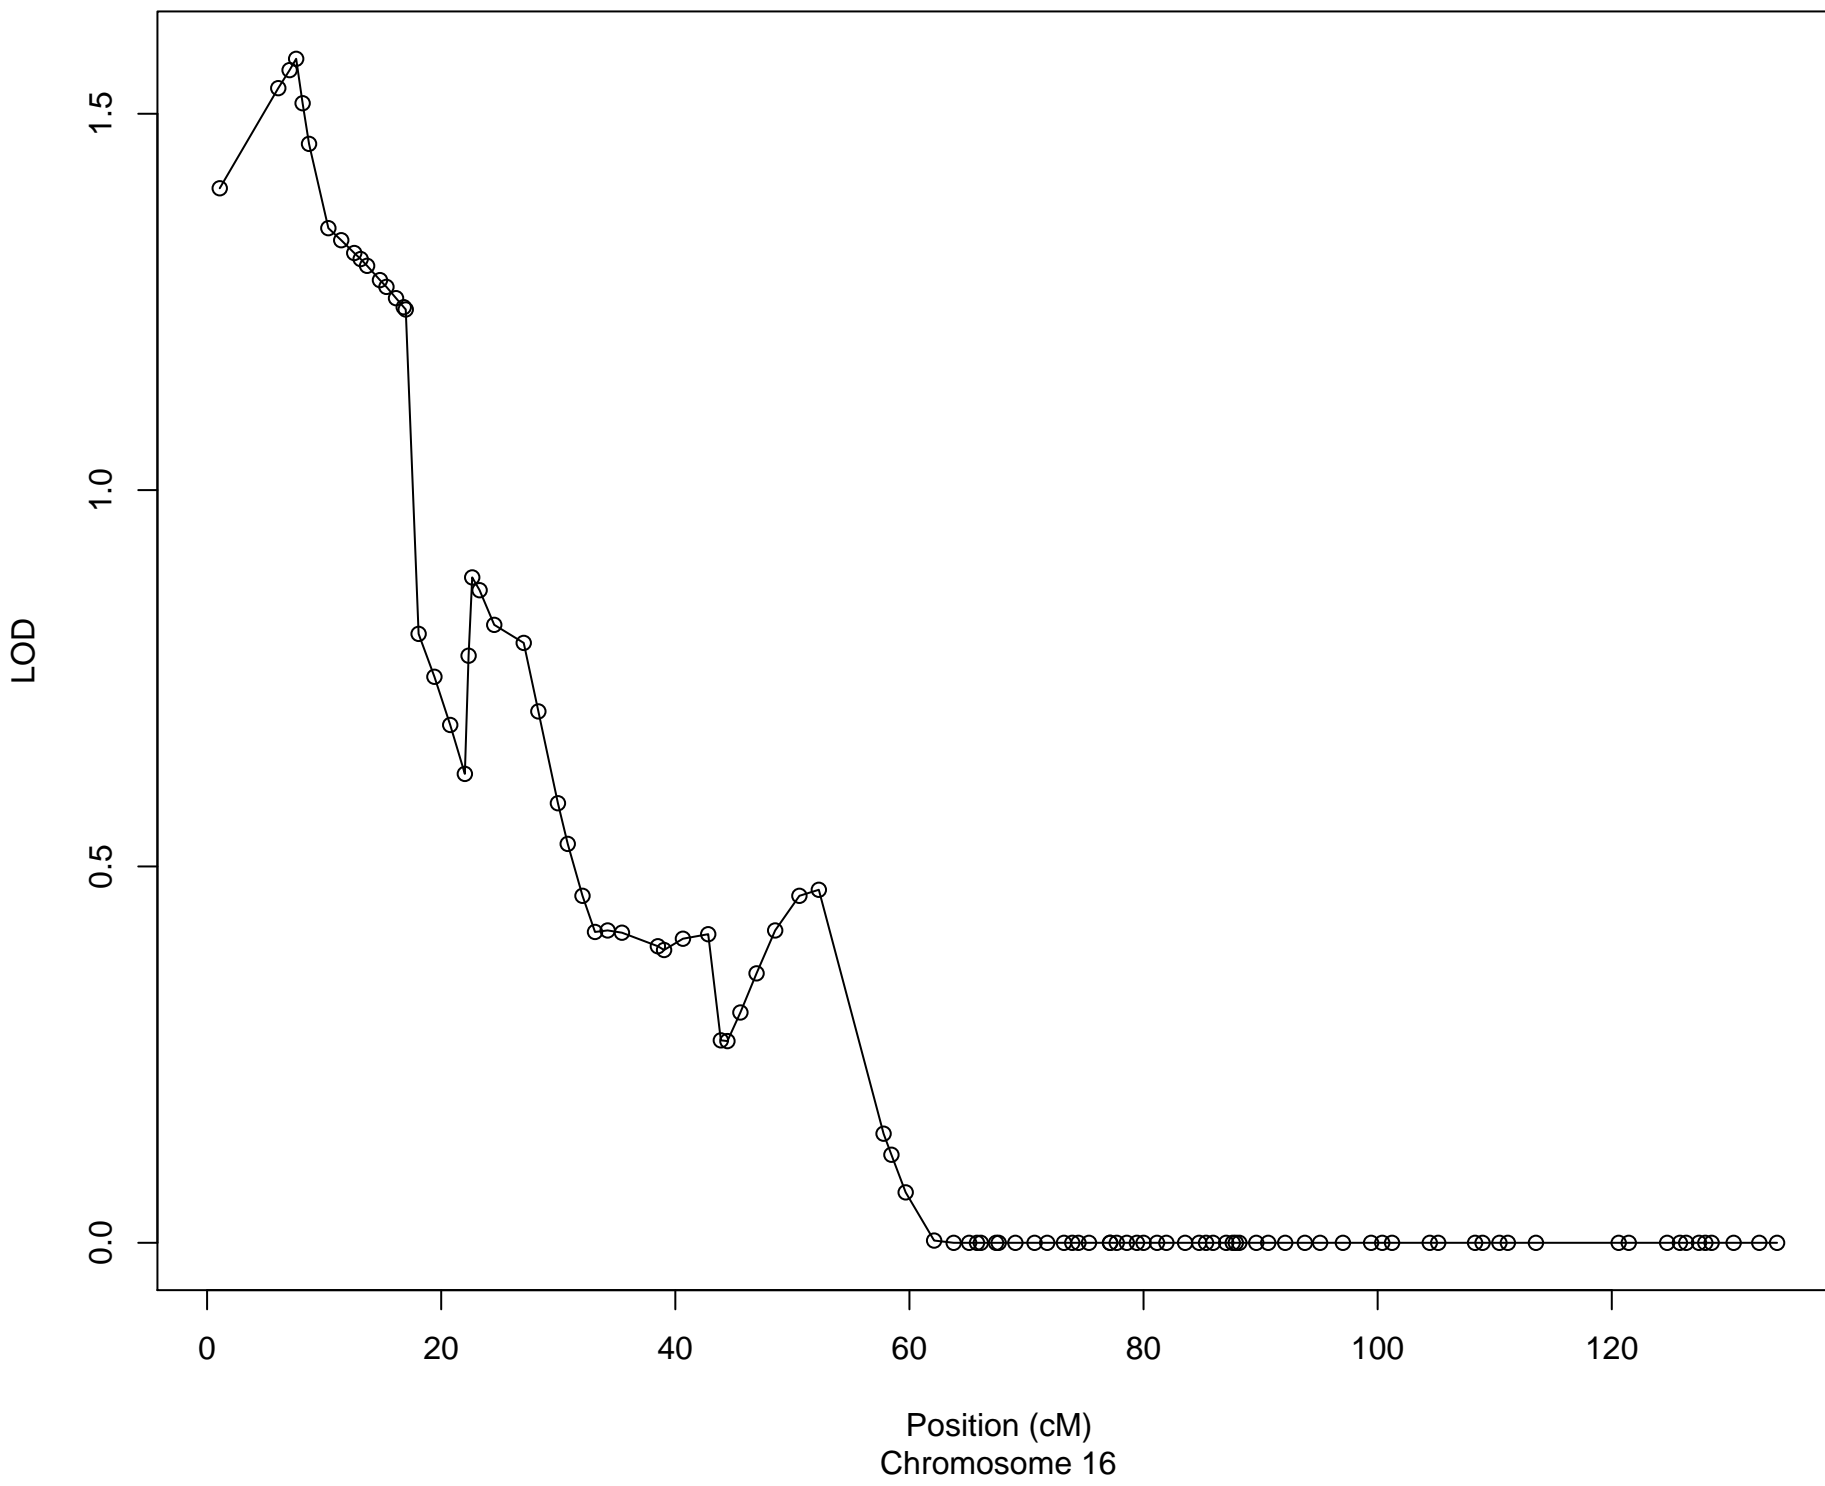

# IC50 (9-aminocamptothecin) (IC50\_9AC)

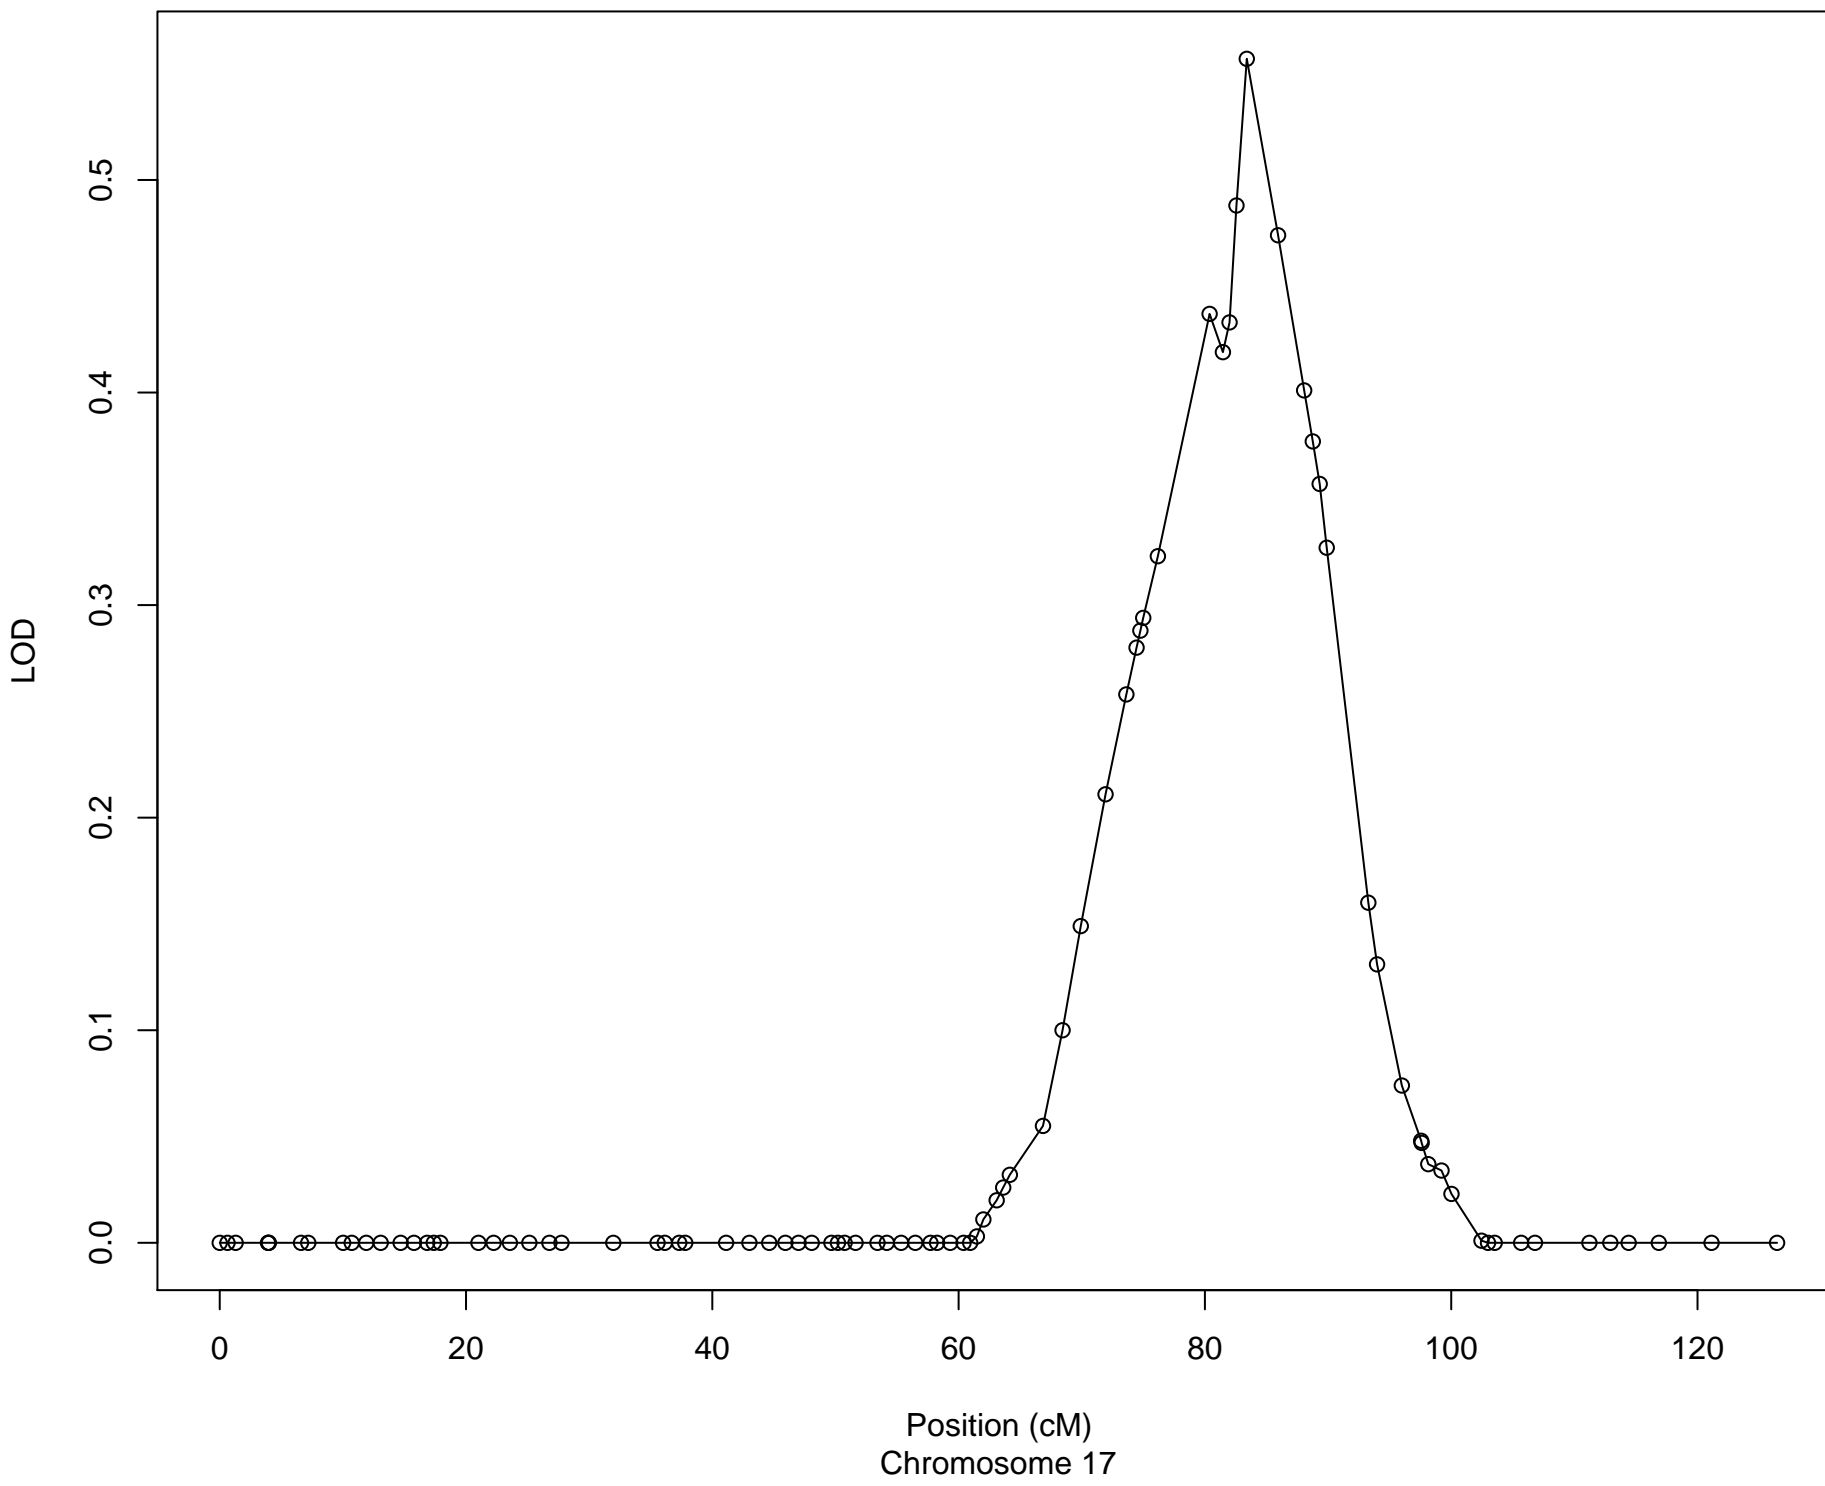

# IC50 (9-aminocamptothecin) (IC50\_9AC)

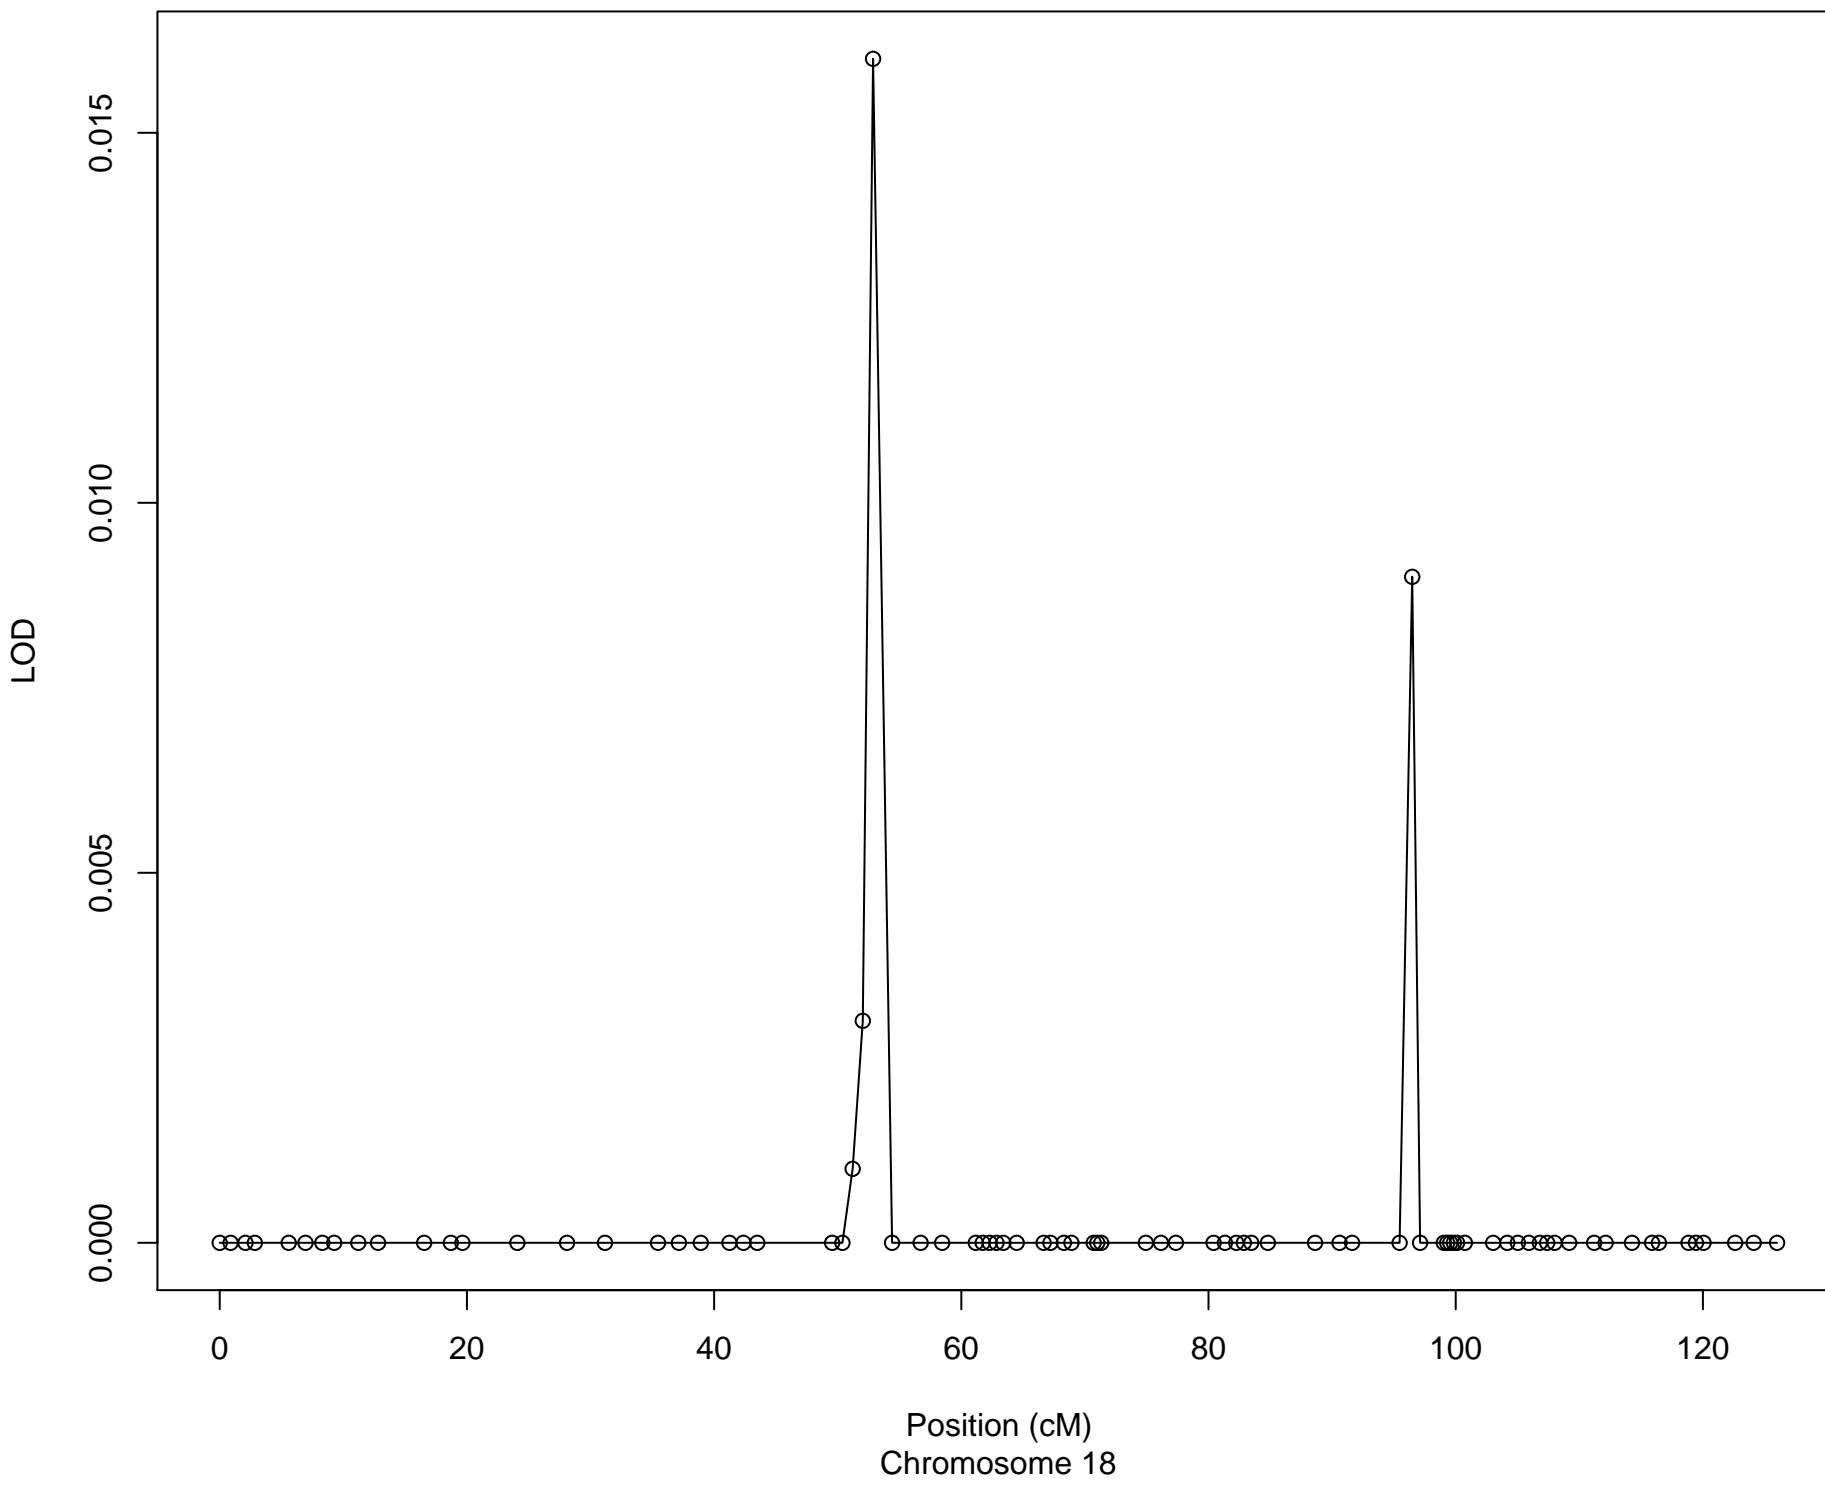



# IC50 (9-aminocamptothecin) (IC50\_9AC)

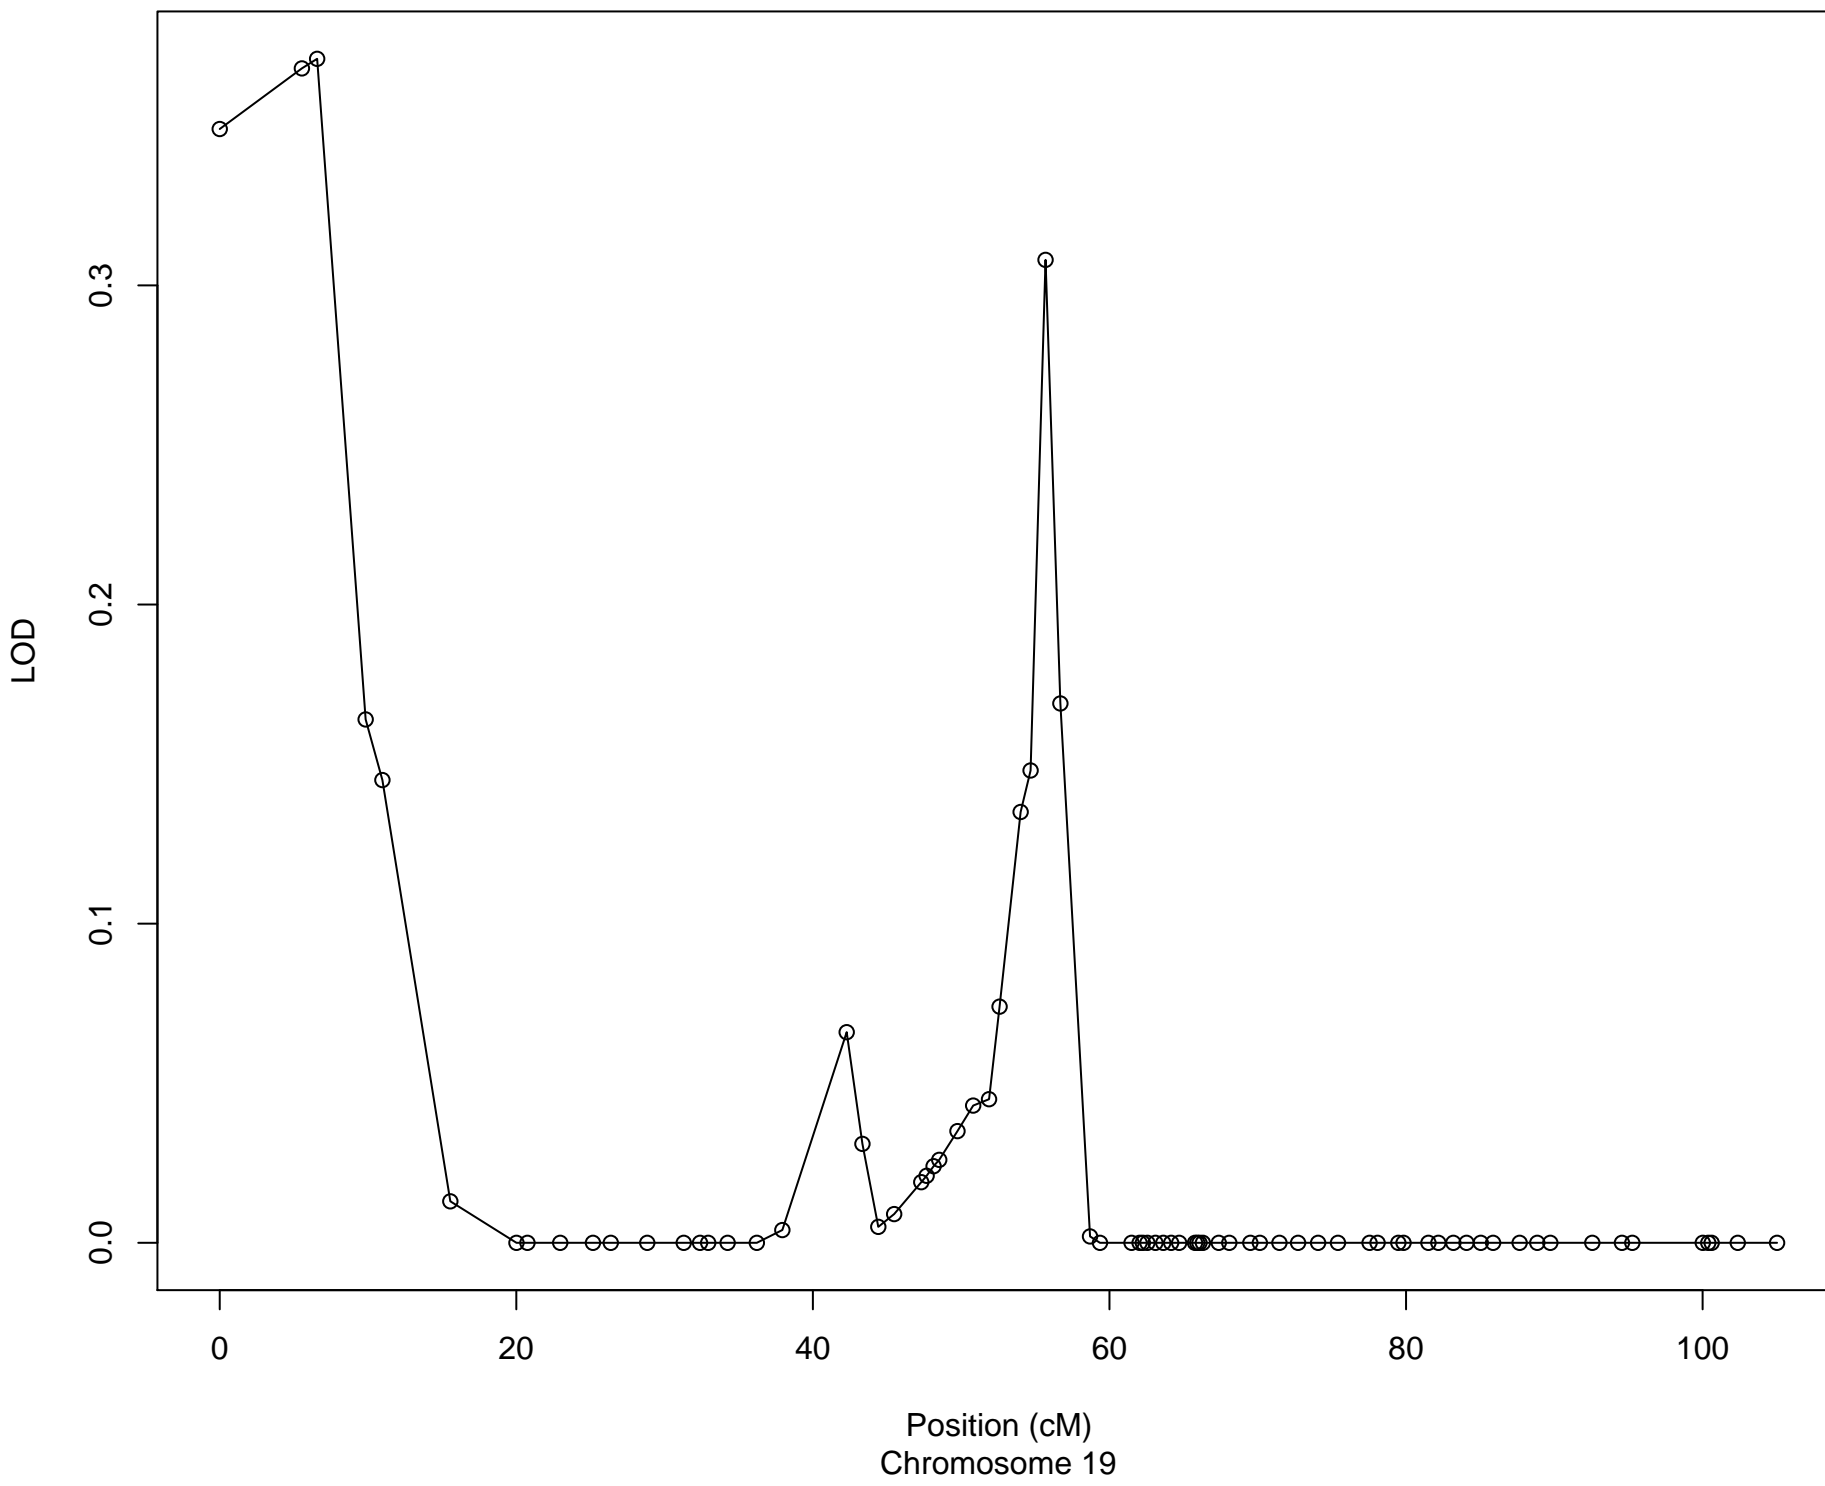

# IC50 (9-aminocamptothecin) (IC50\_9AC)

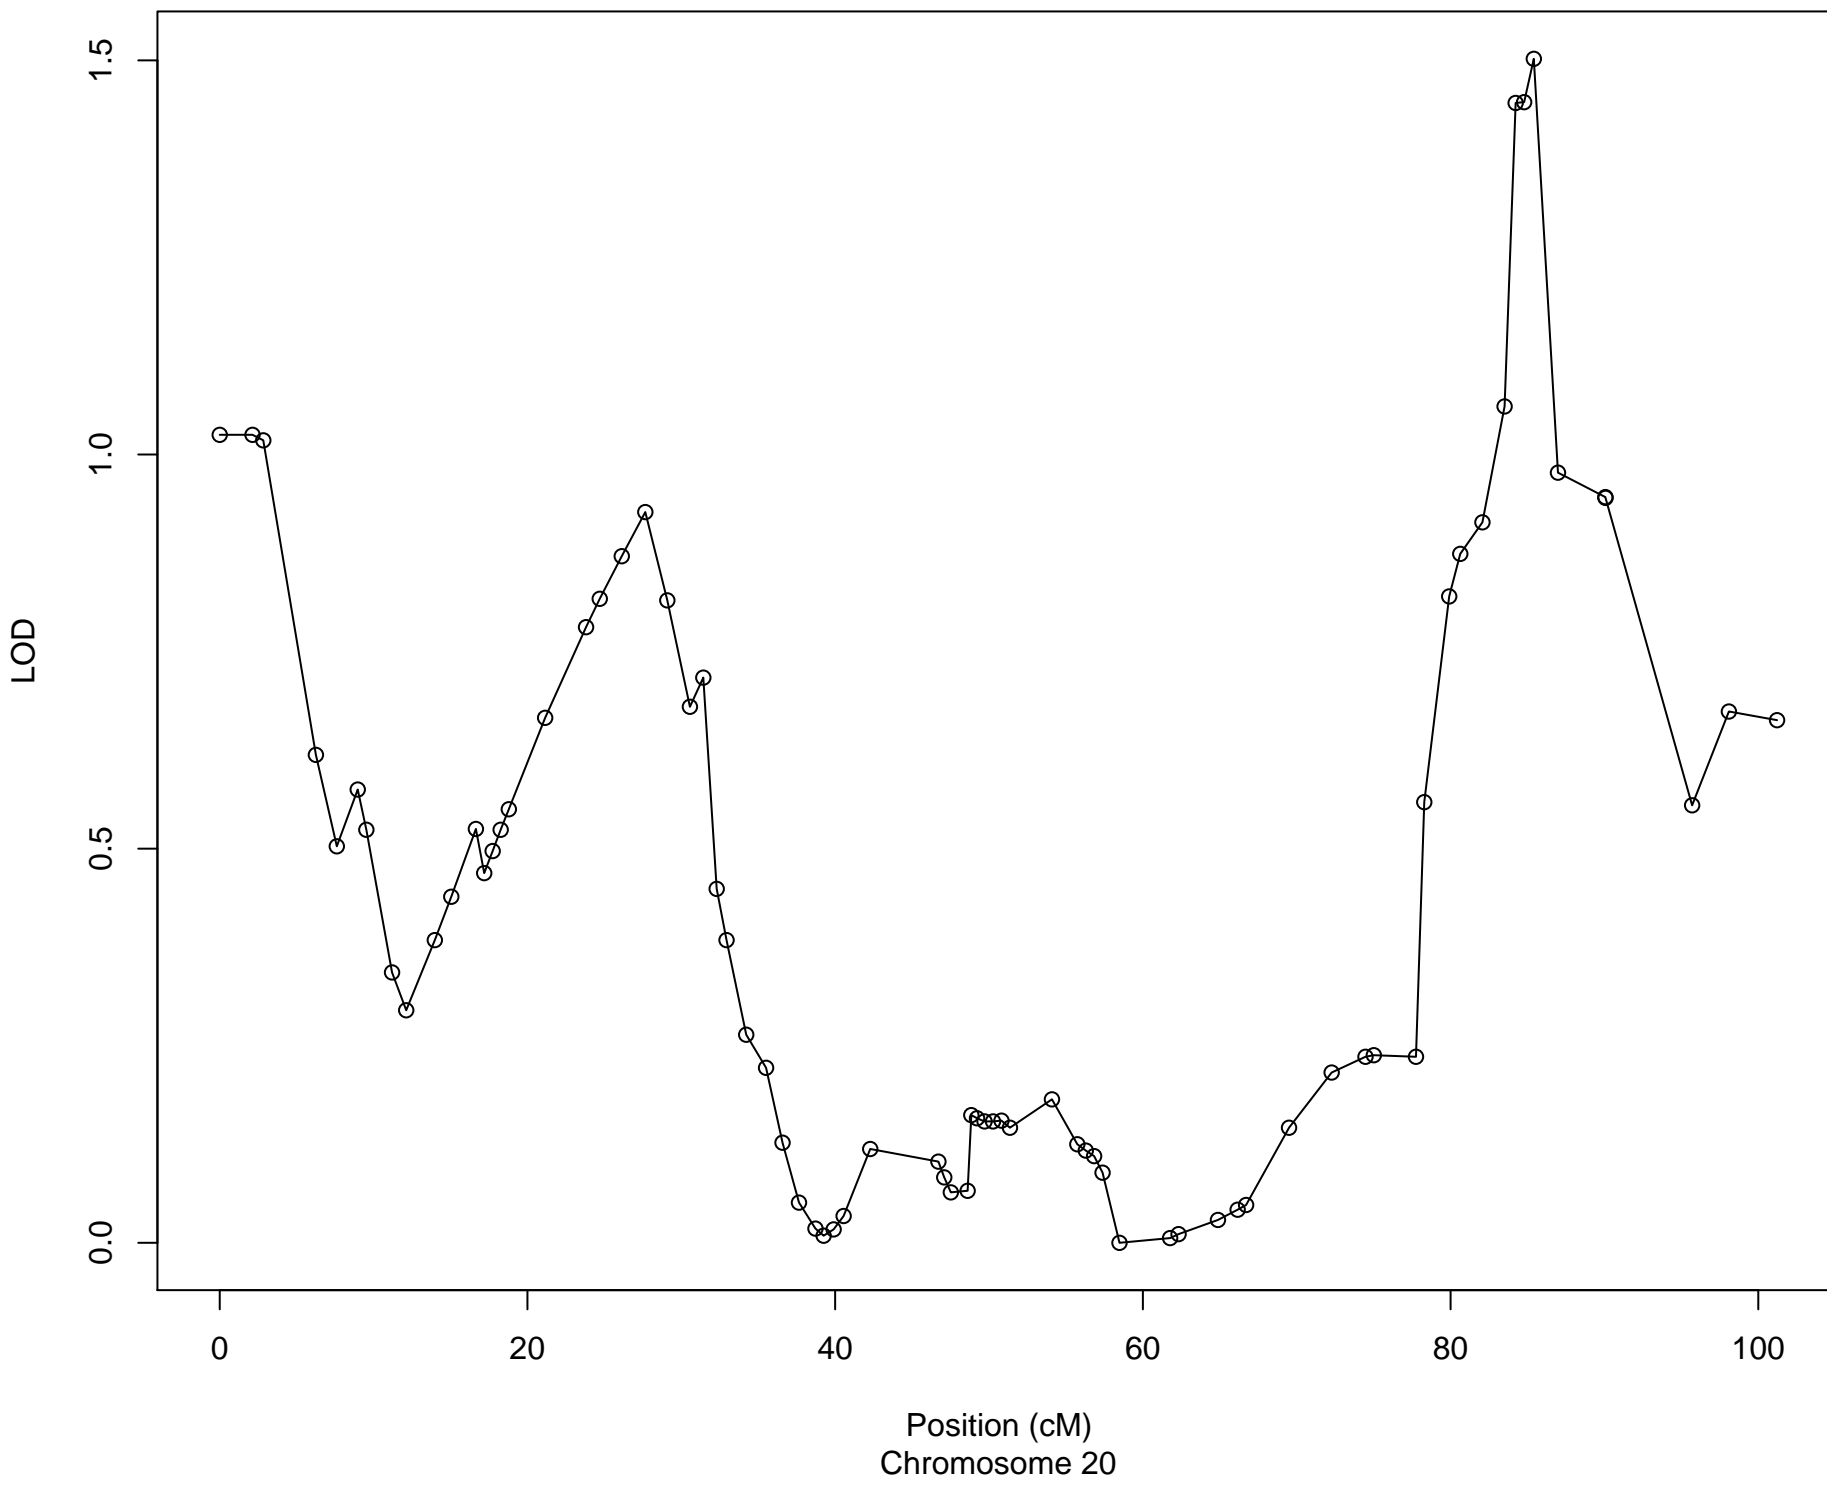

# IC50 (9-aminocamptothecin) (IC50\_9AC)

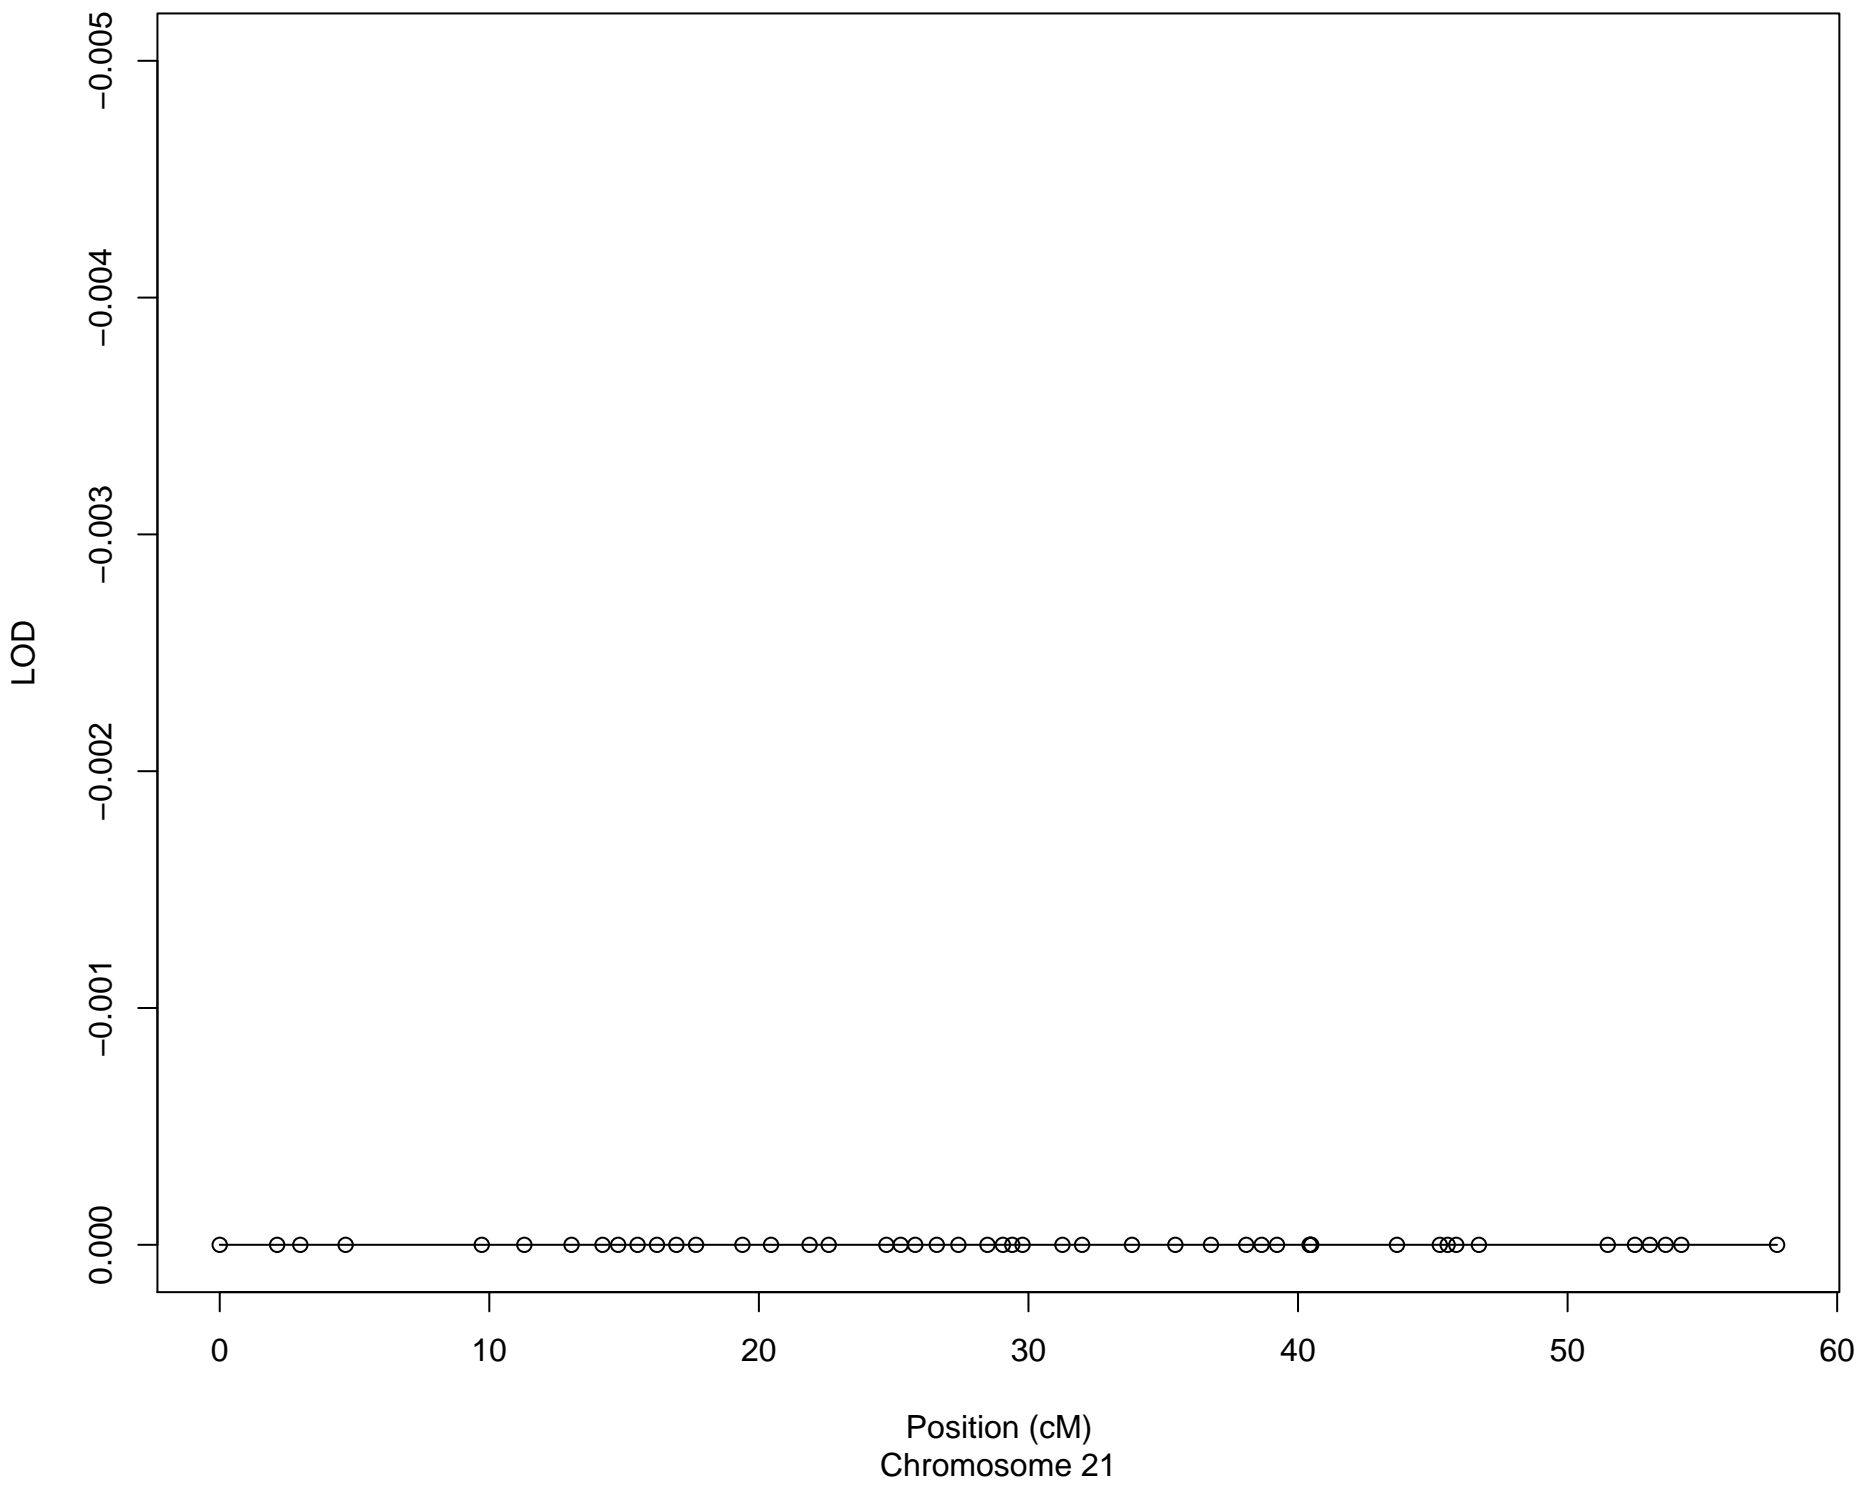

# IC50 (9-aminocamptothecin) (IC50\_9AC)

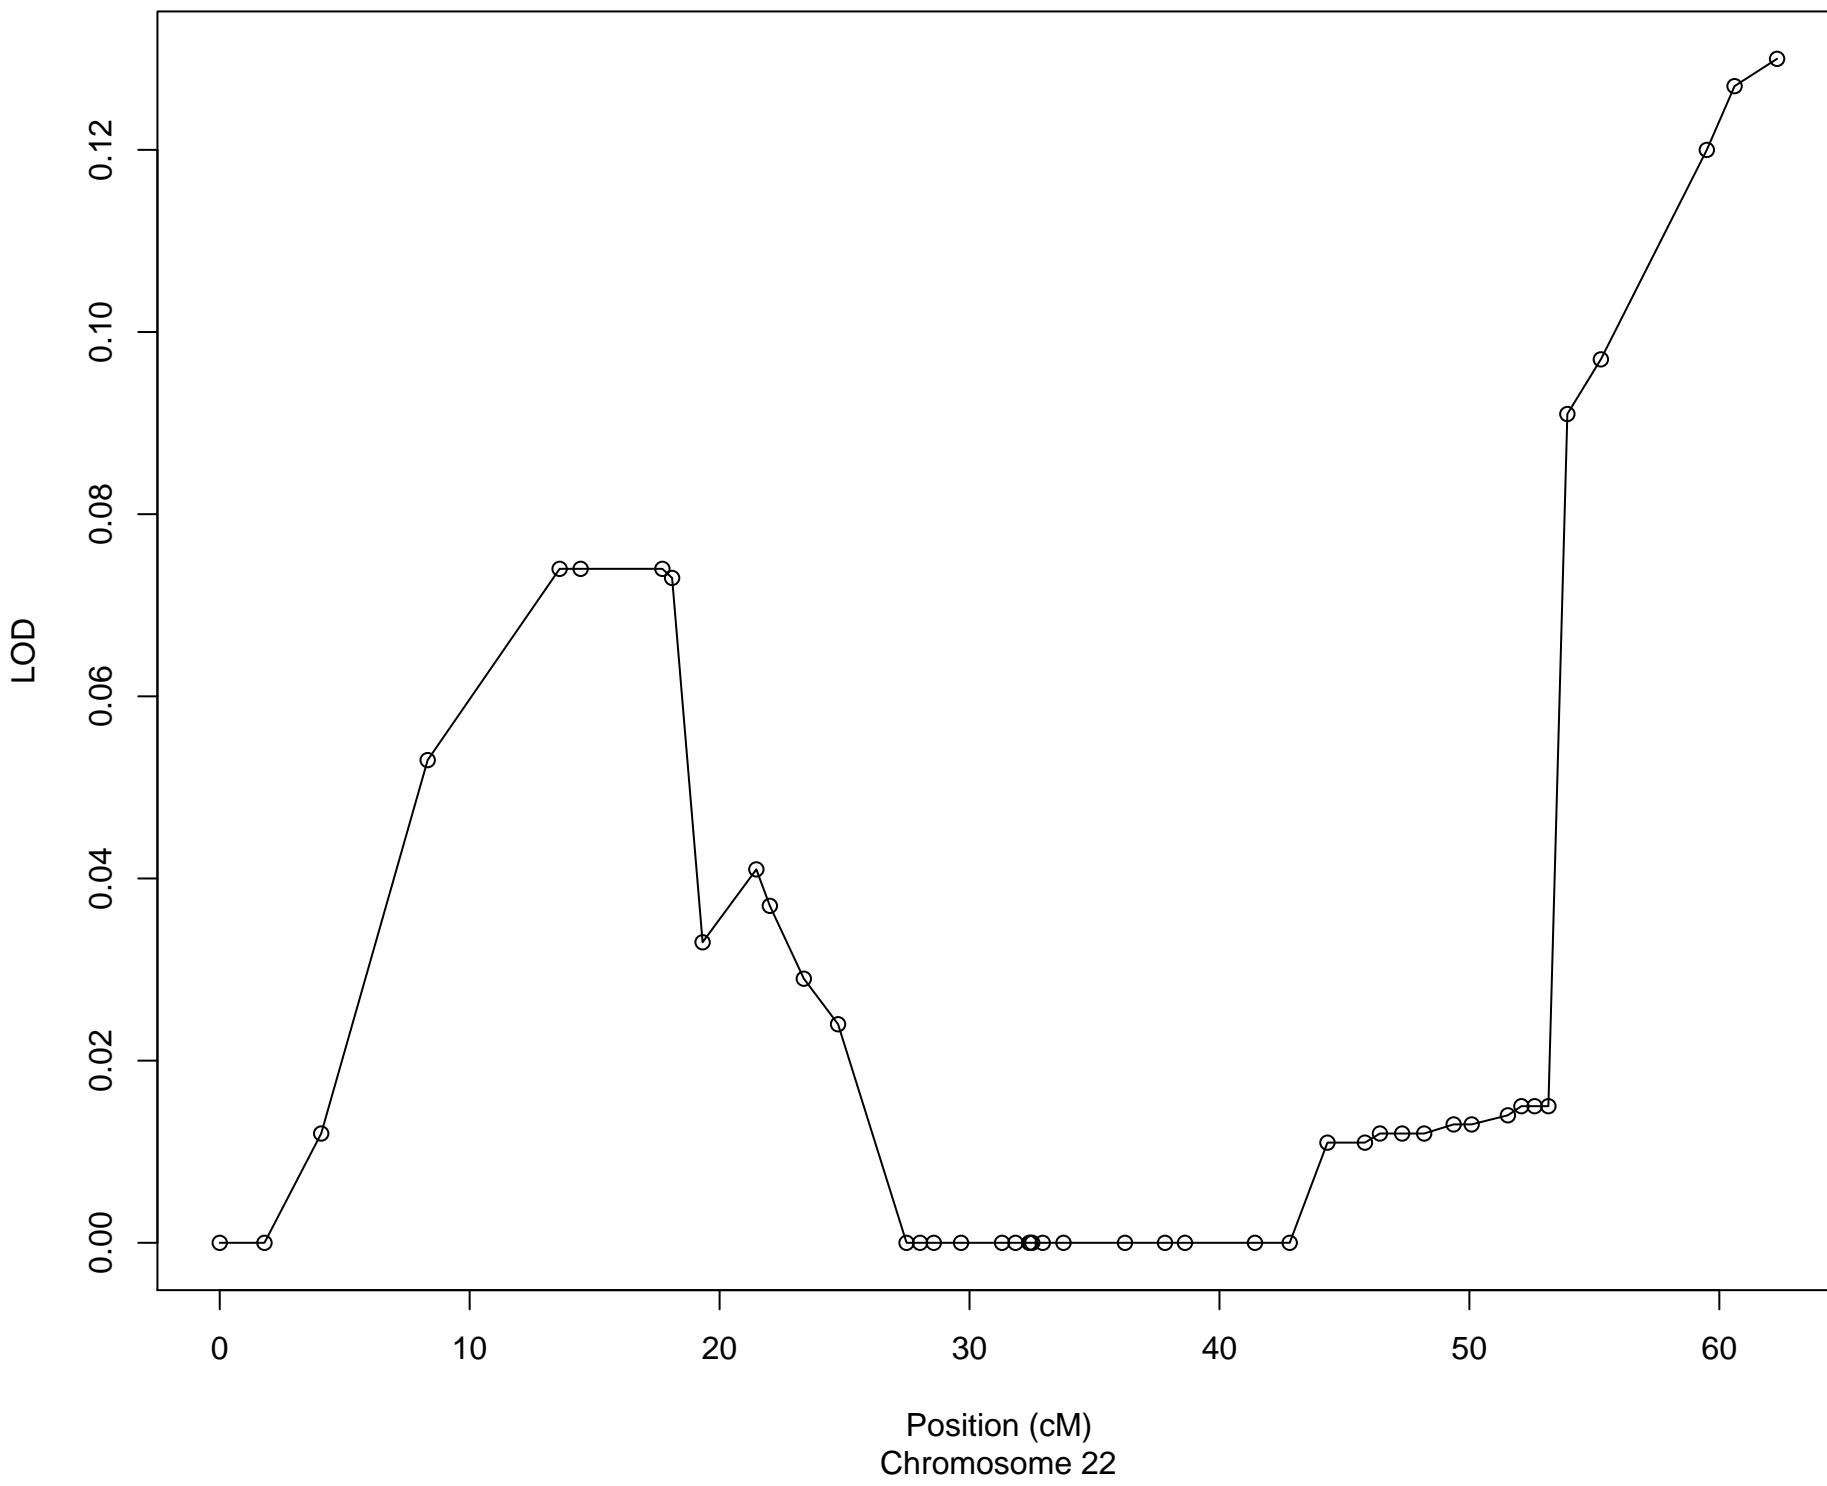

# IC50 (9-nitrocamptothecin) (IC50\_9NC)

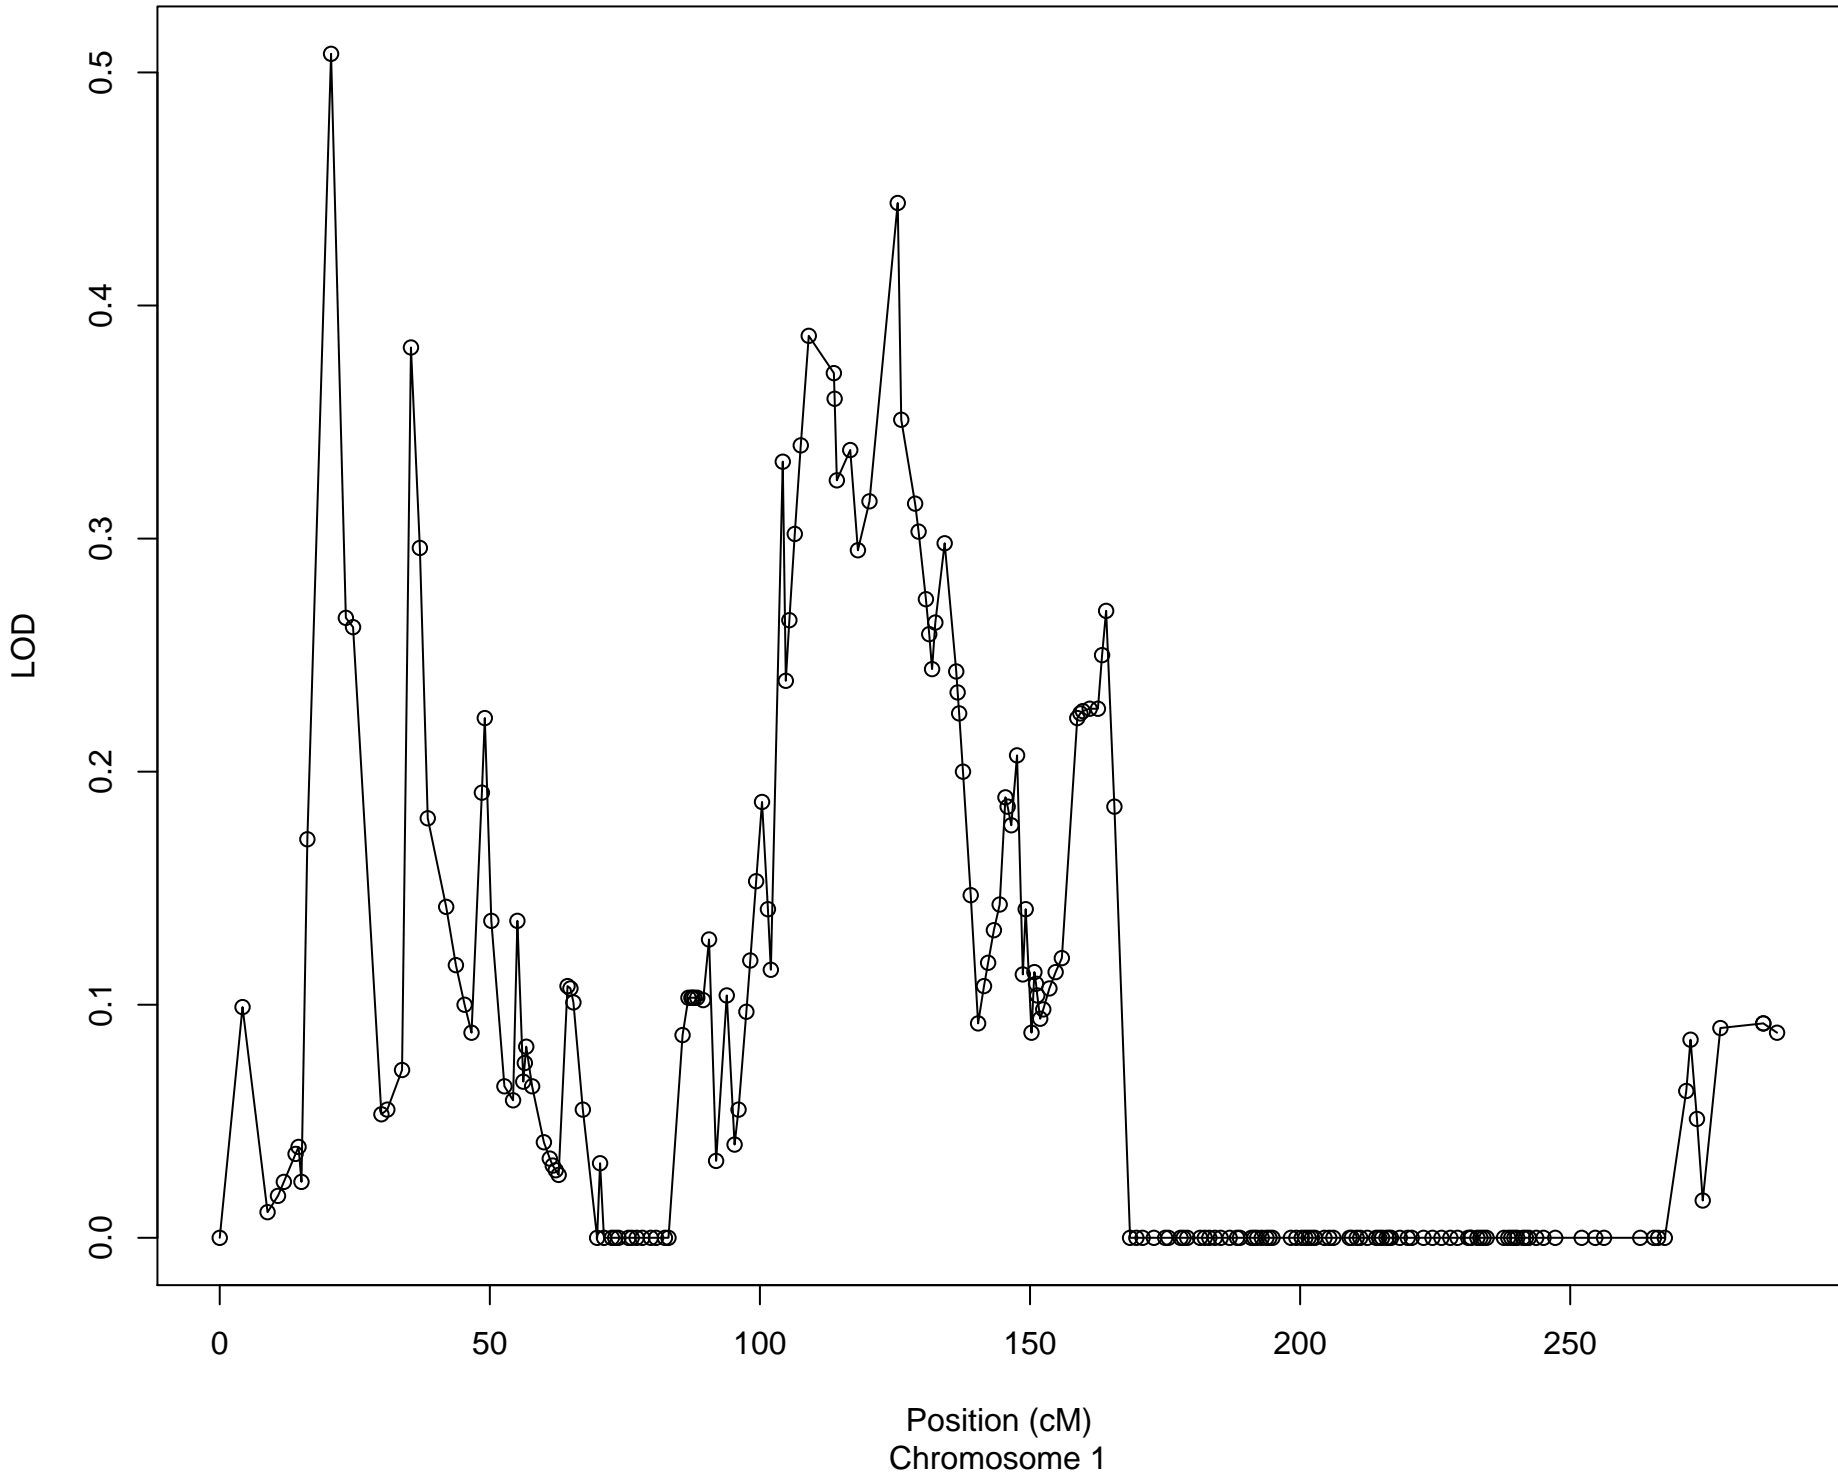

# IC50 (9-nitrocamptothecin) (IC50\_9NC)

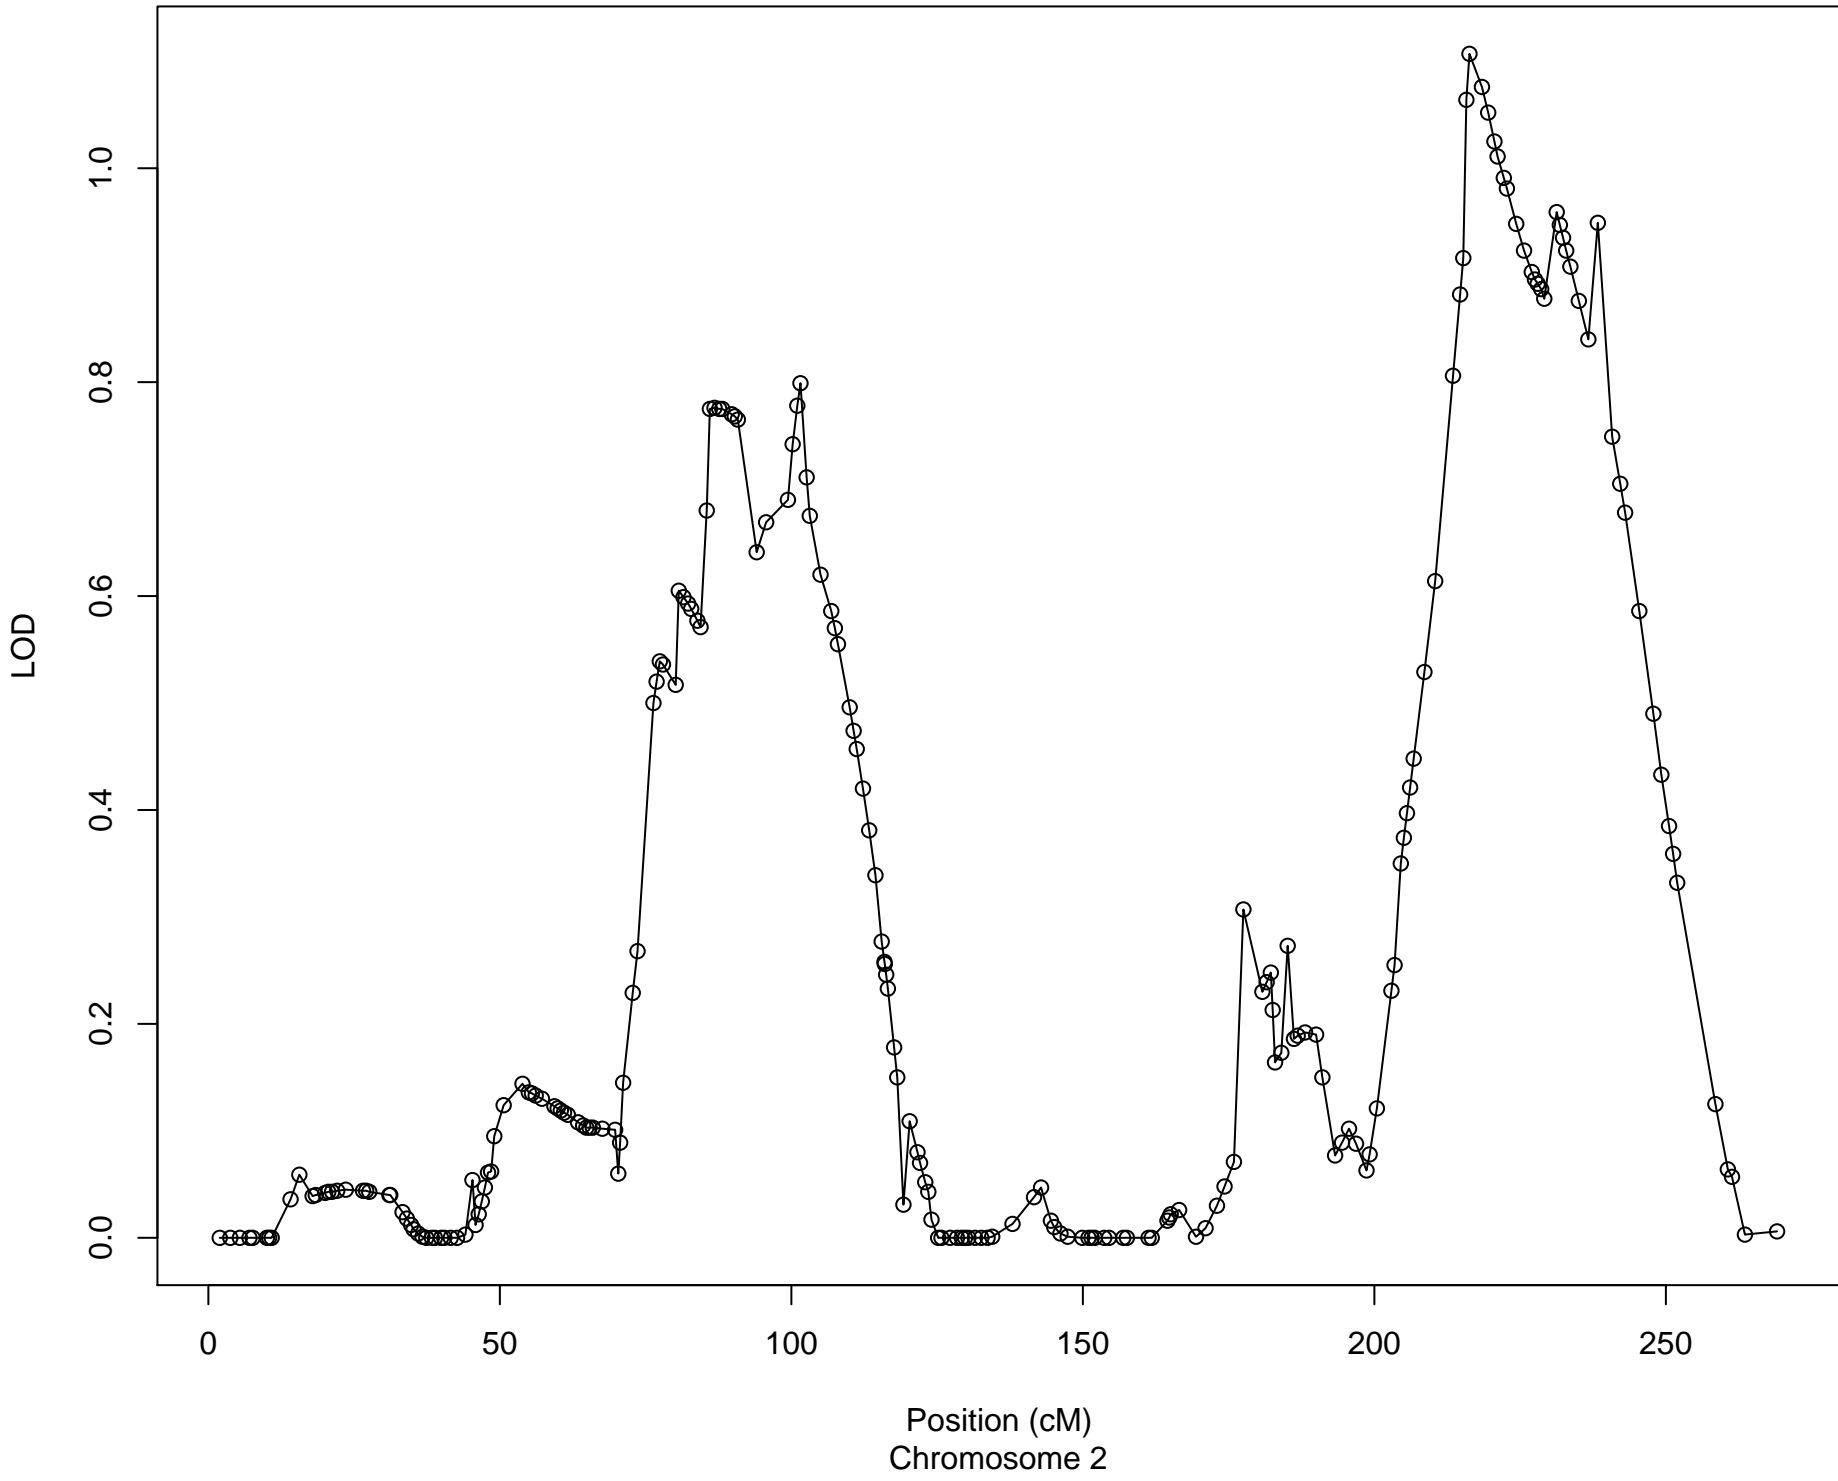

# IC50 (9-nitrocamptothecin) (IC50\_9NC)

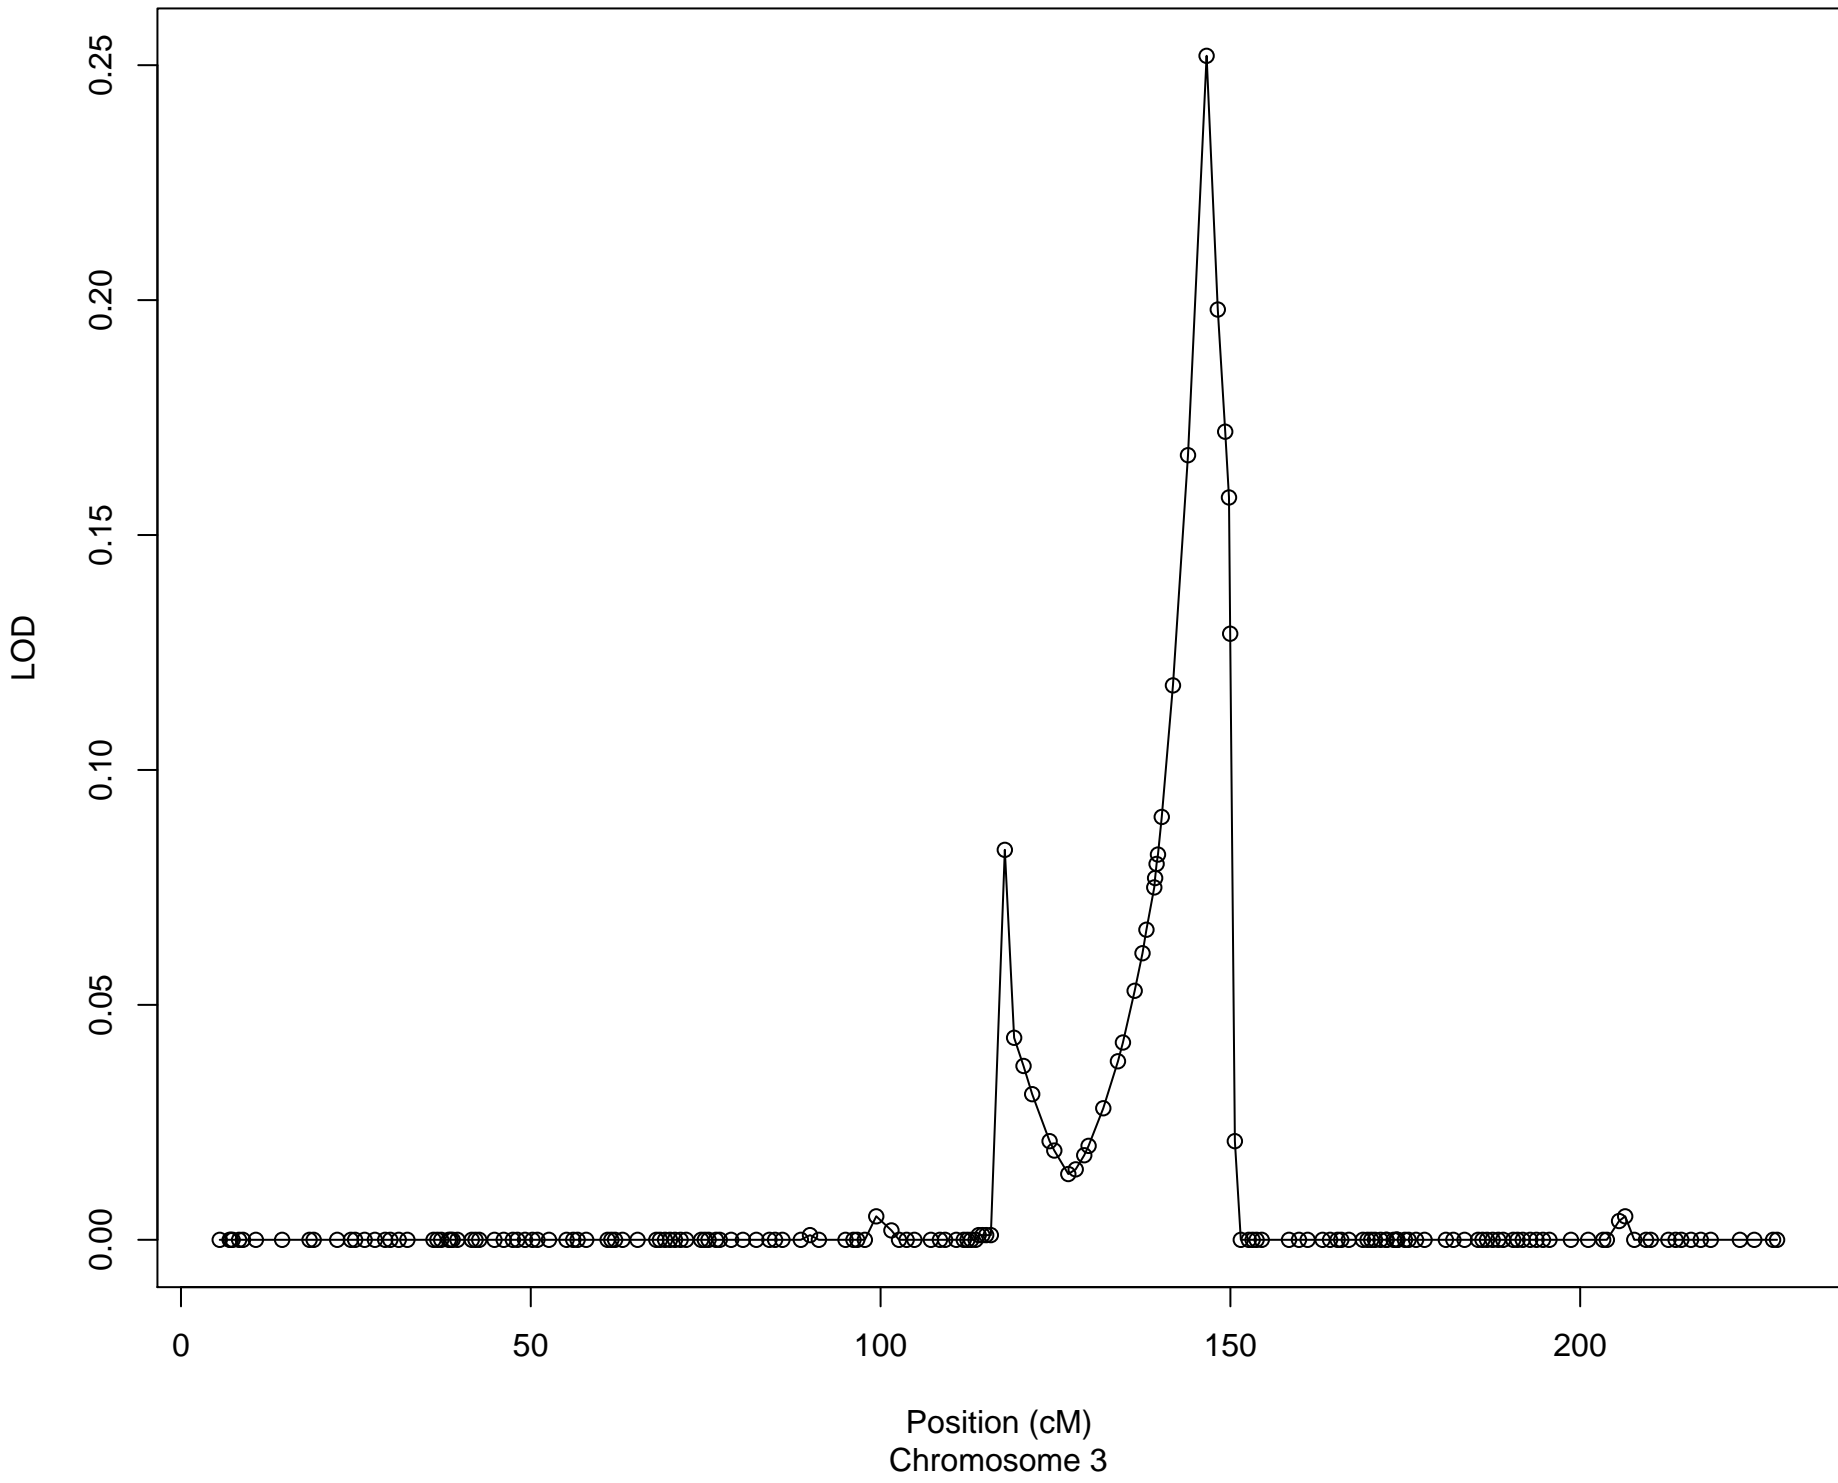

# IC50 (9-nitrocamptothecin) (IC50\_9NC)

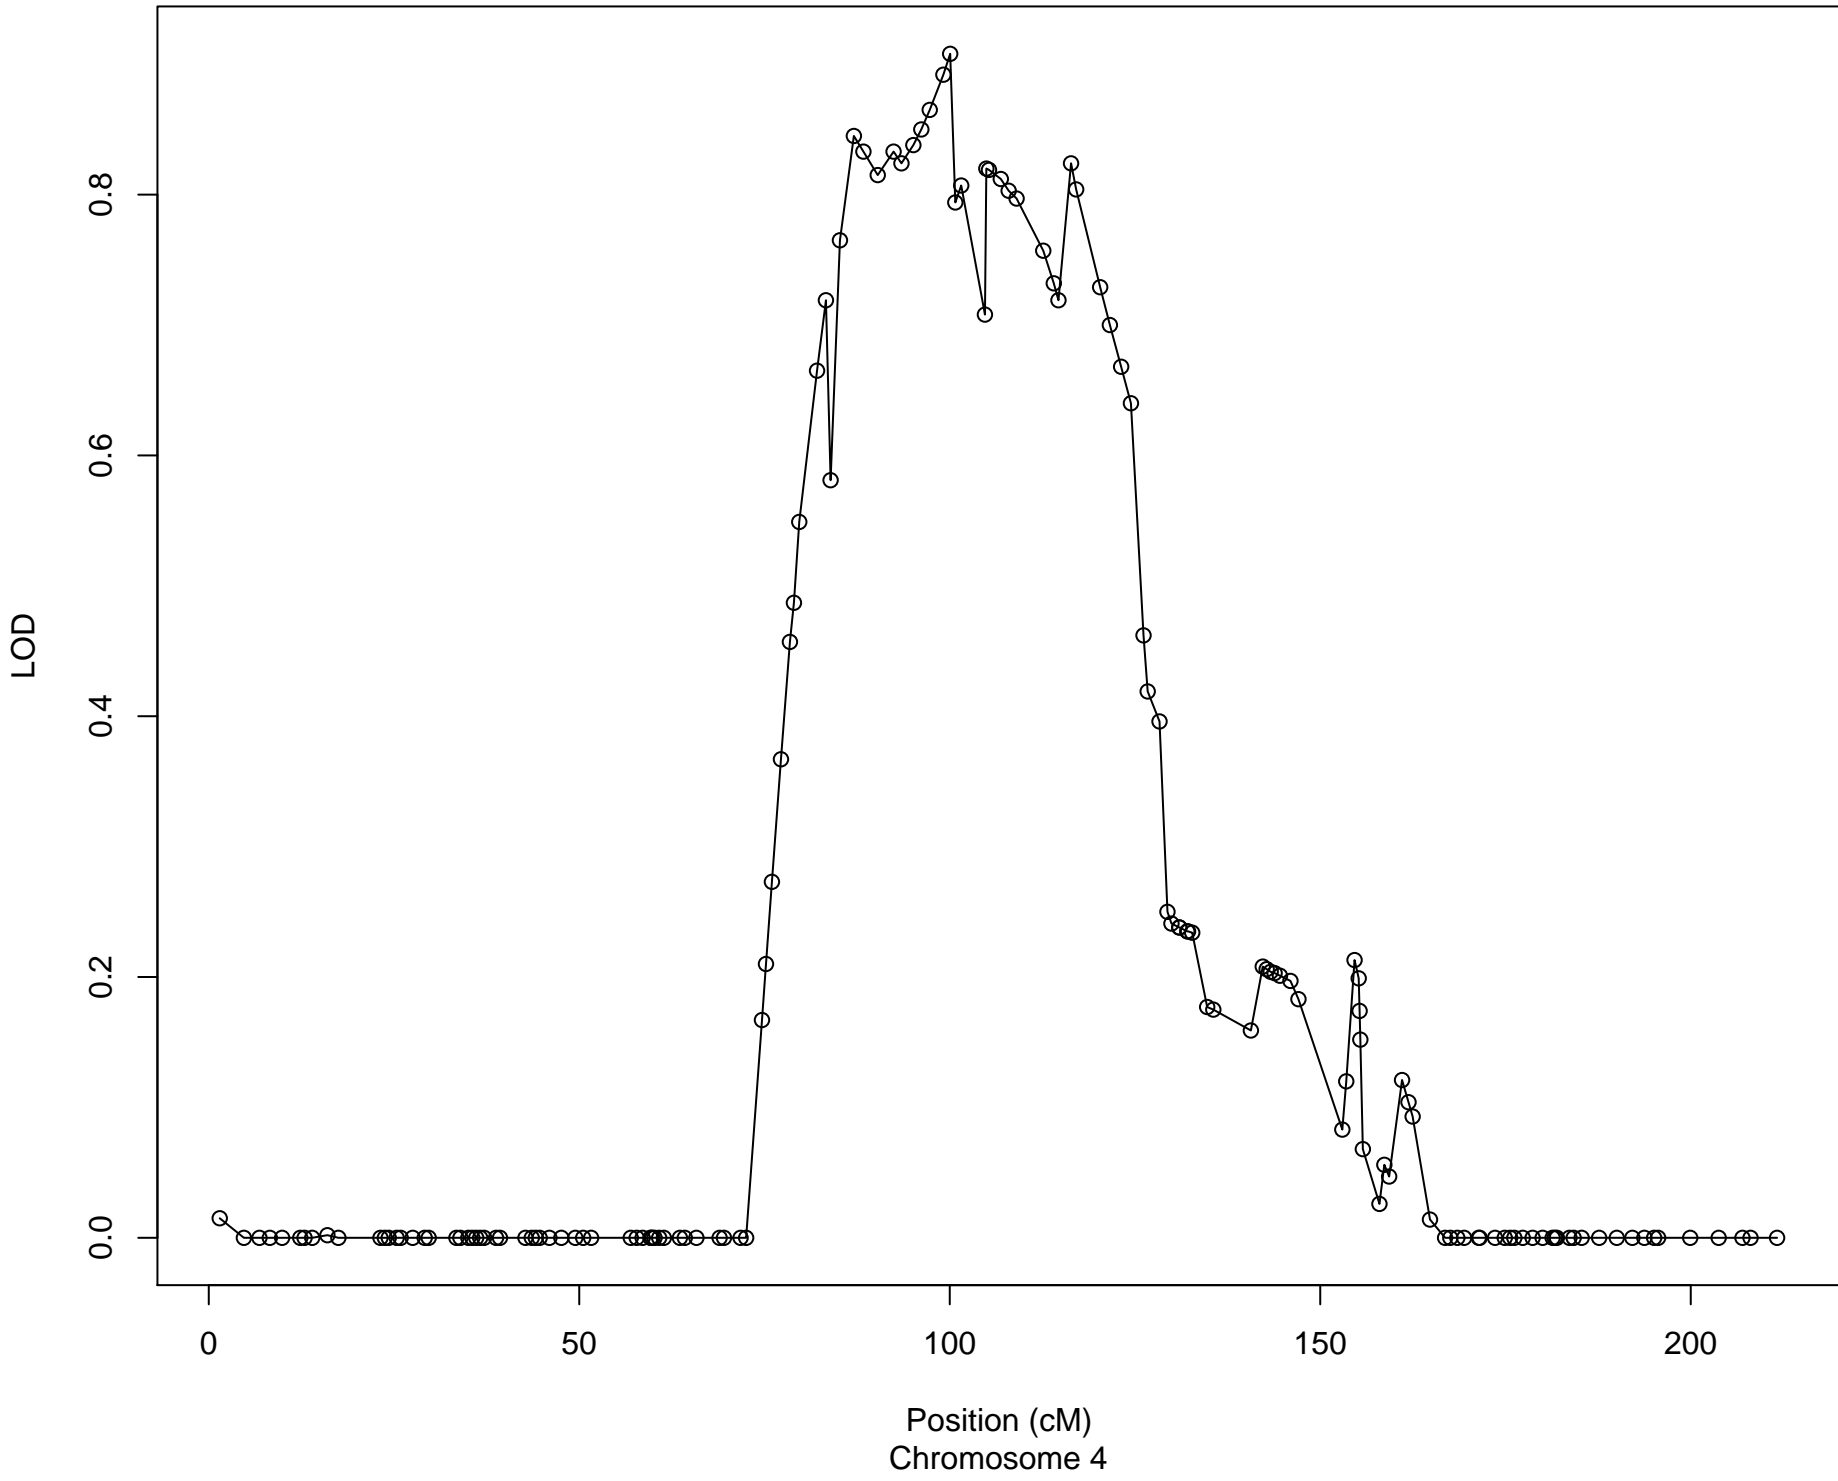



# IC50 (9-nitrocamptothecin) (IC50\_9NC)

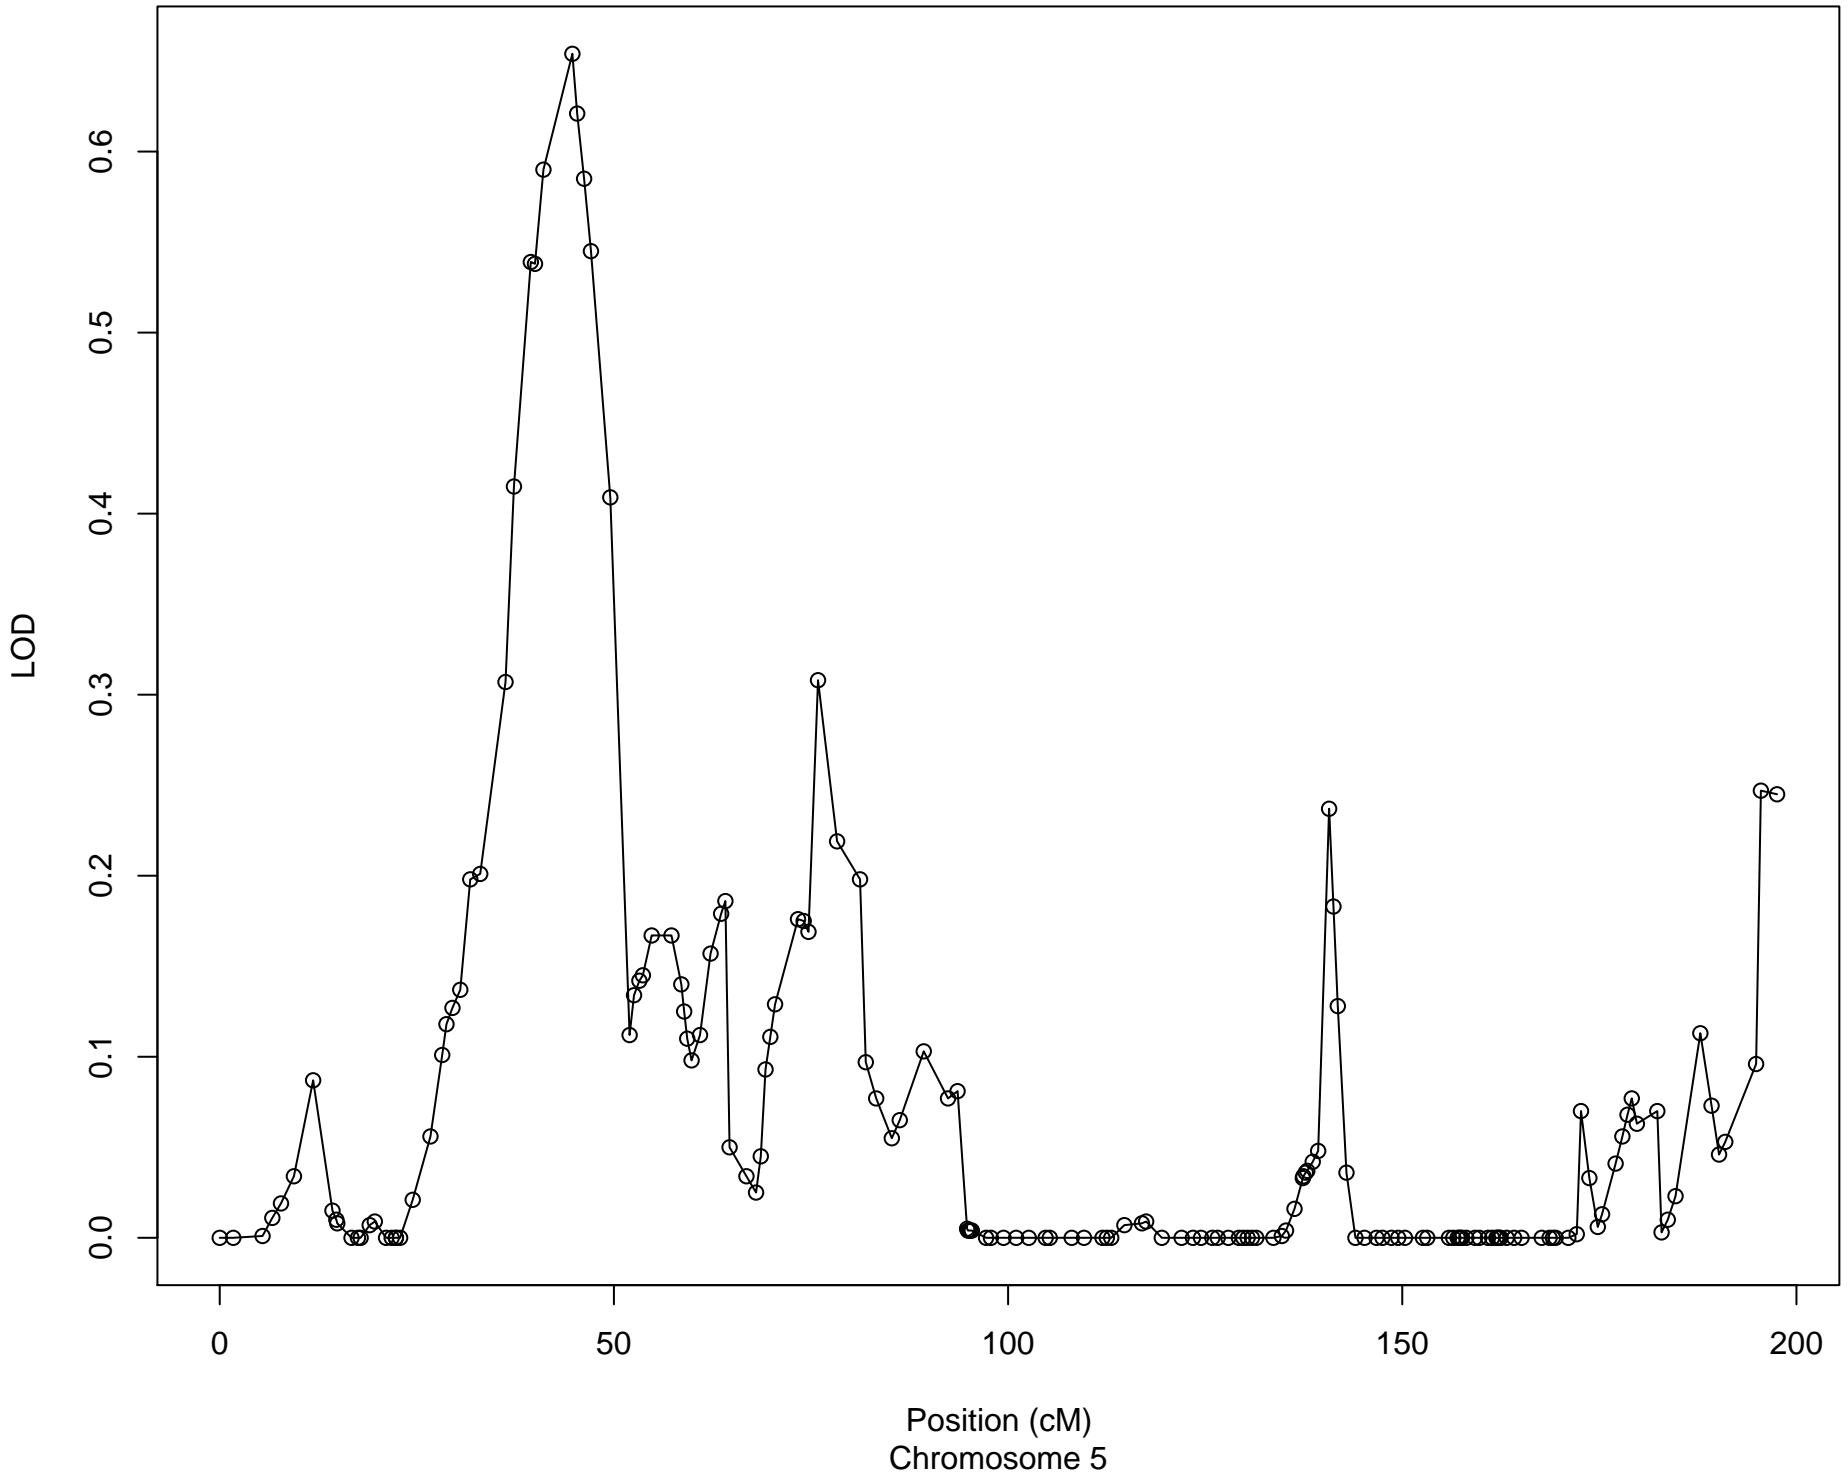

# IC50 (9-nitrocamptothecin) (IC50\_9NC)

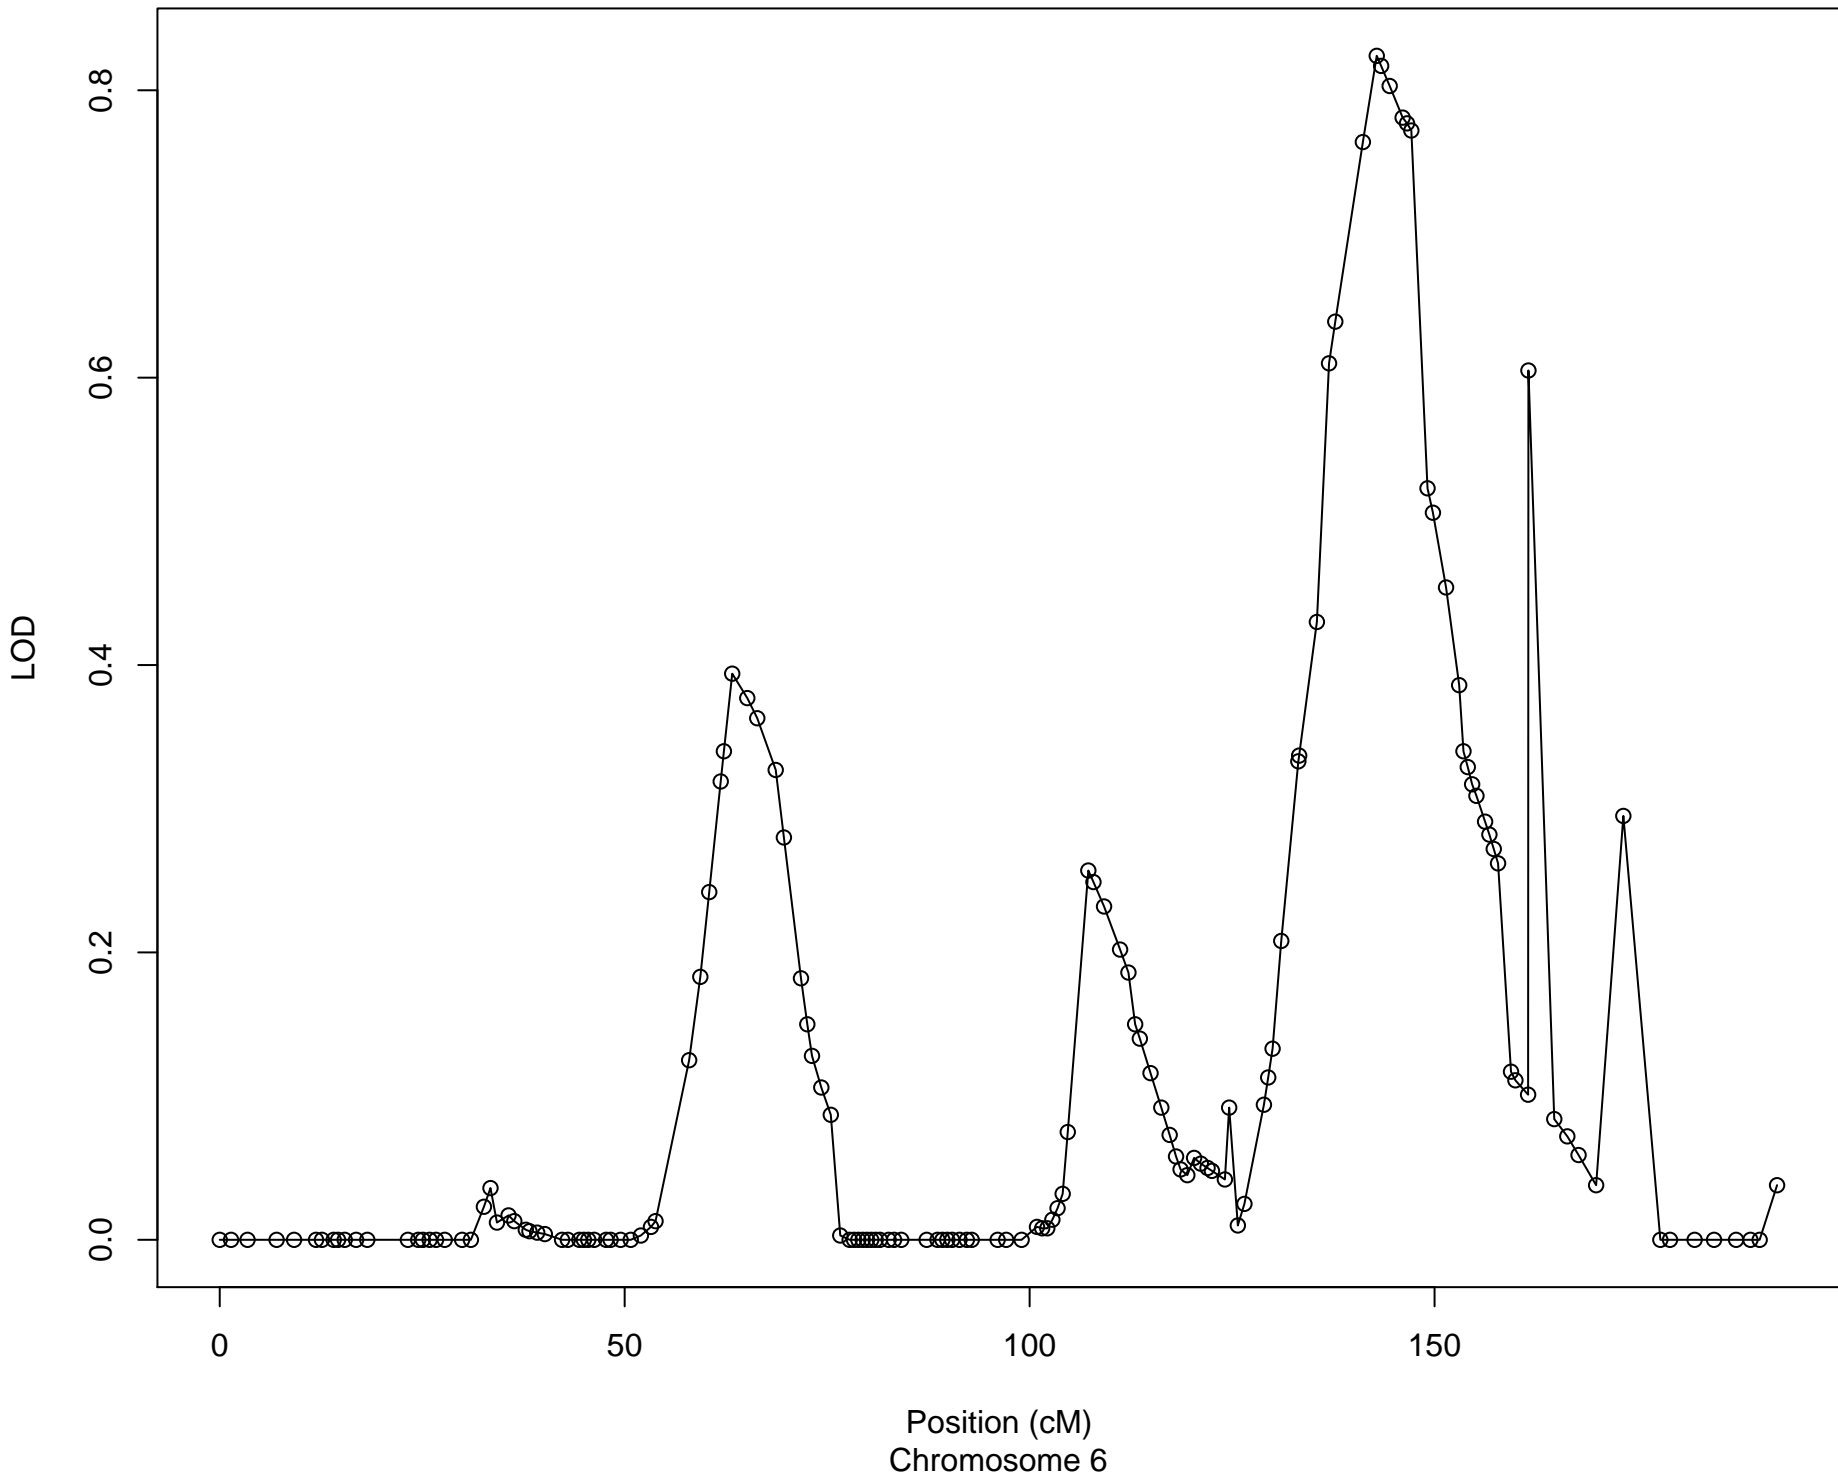

# IC50 (9-nitrocamptothecin) (IC50\_9NC)

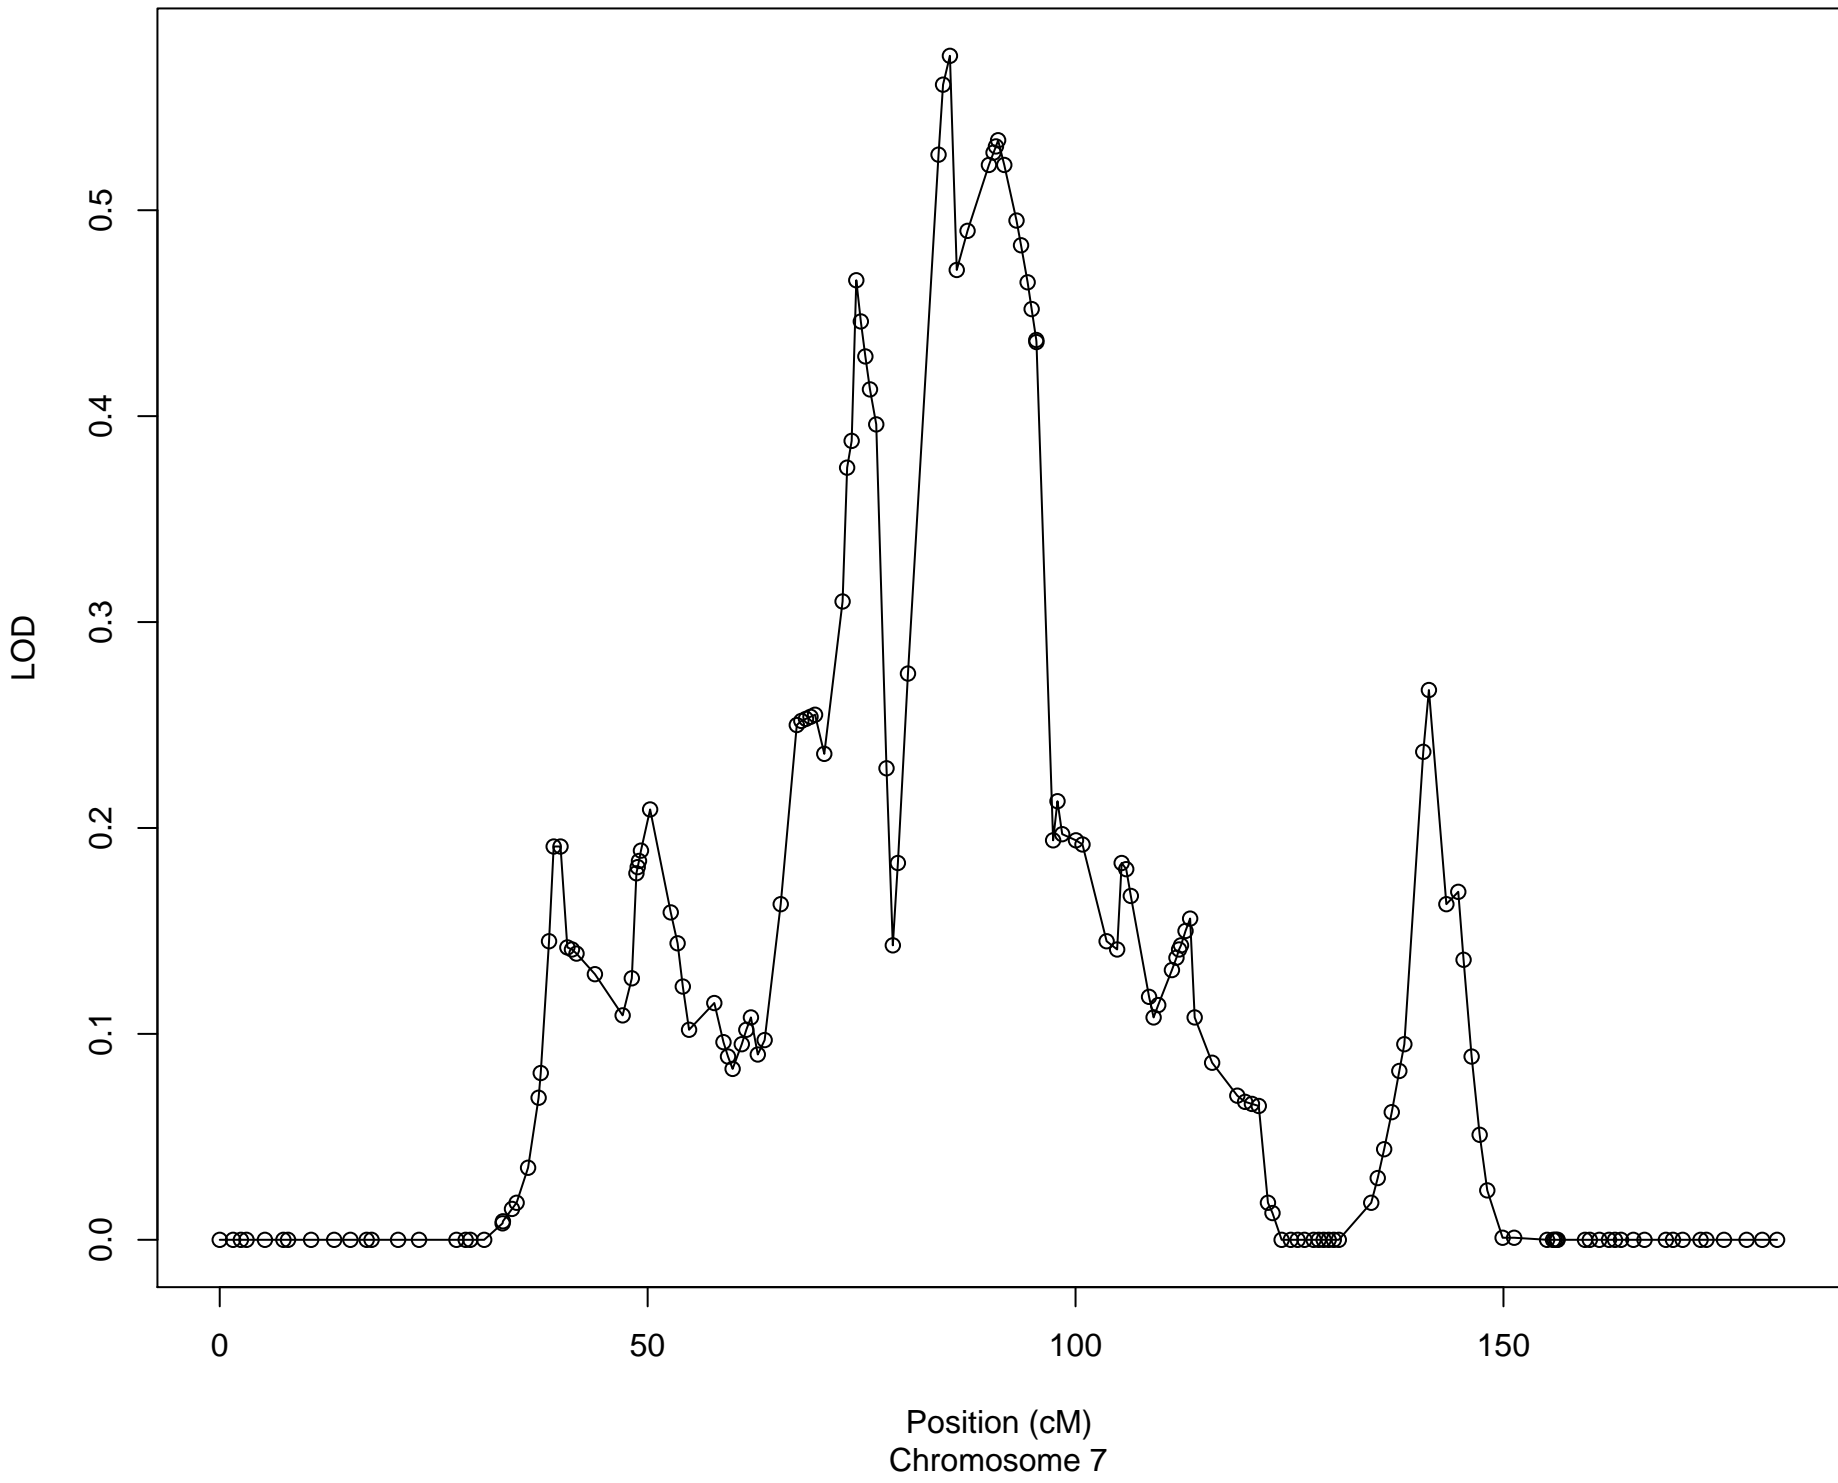

# IC50 (9-nitrocamptothecin) (IC50\_9NC)

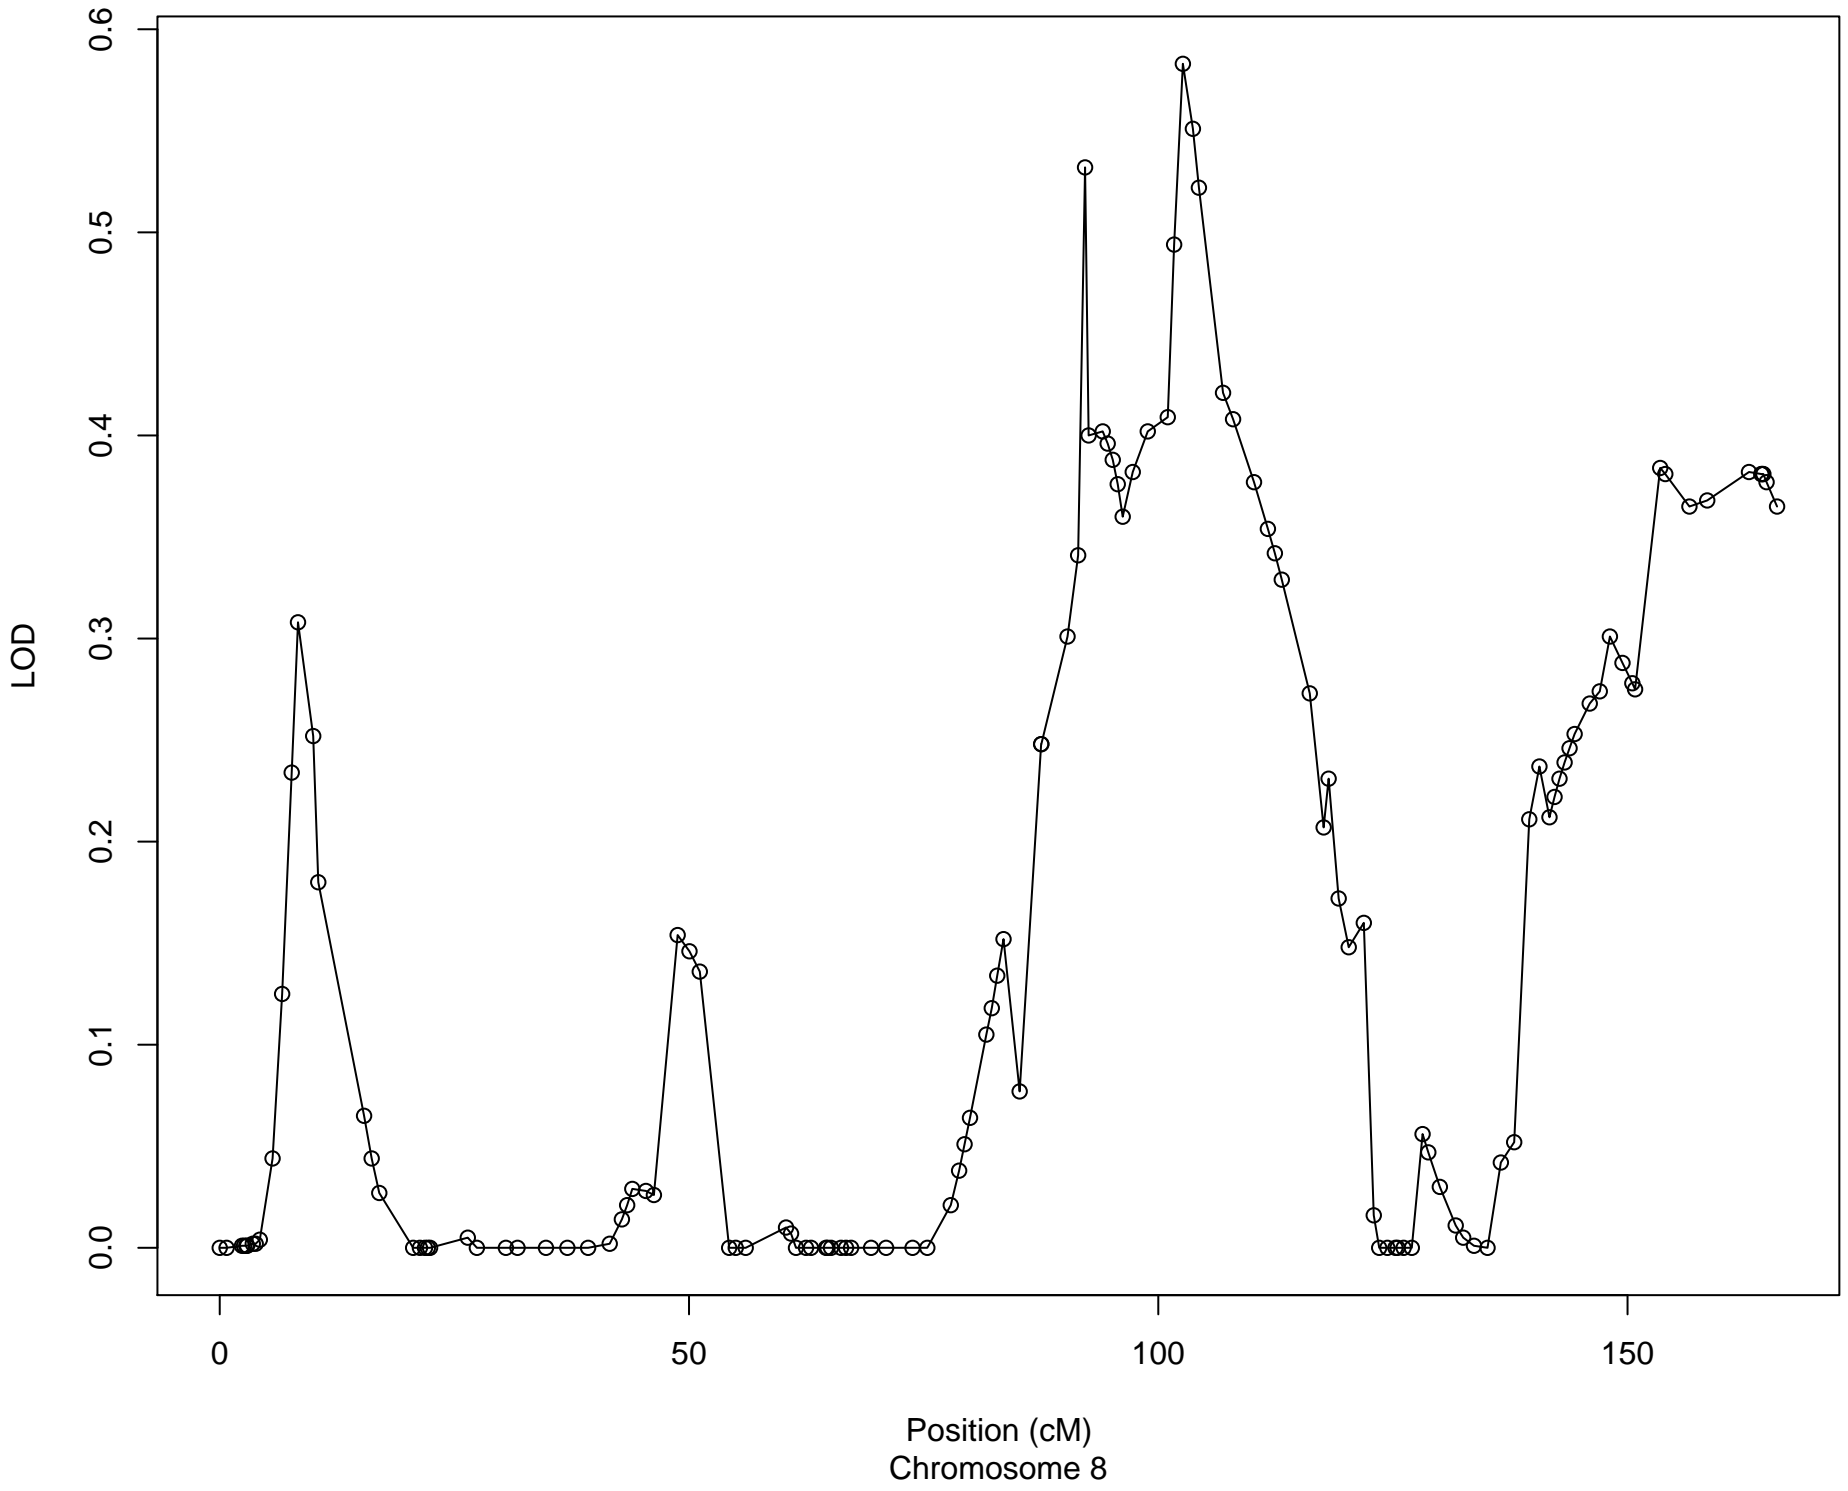

# IC50 (9-nitrocamptothecin) (IC50\_9NC)

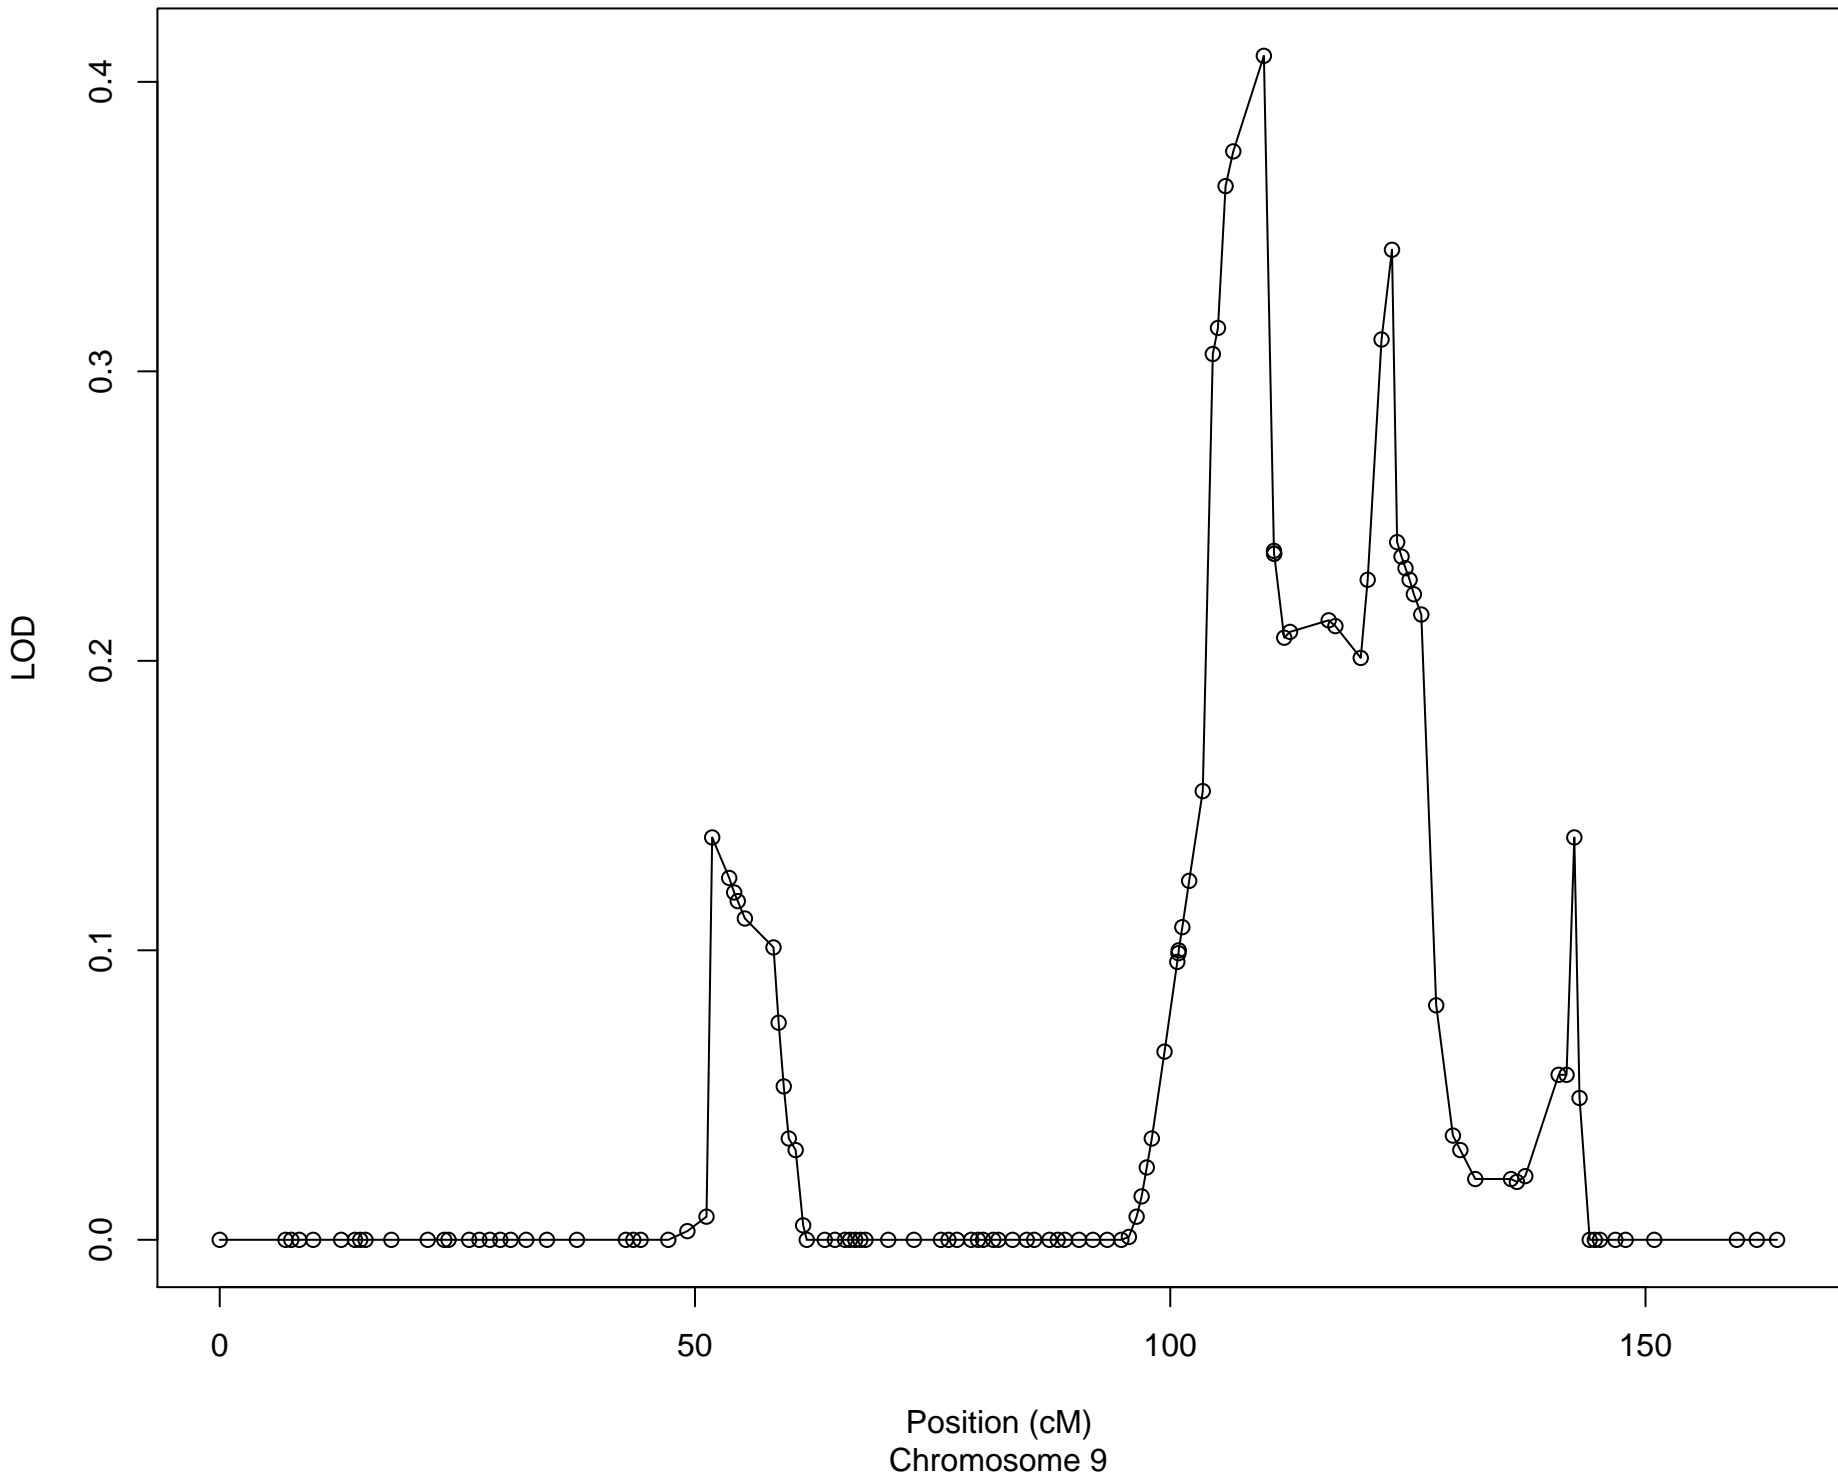

# IC50 (9-nitrocamptothecin) (IC50\_9NC)

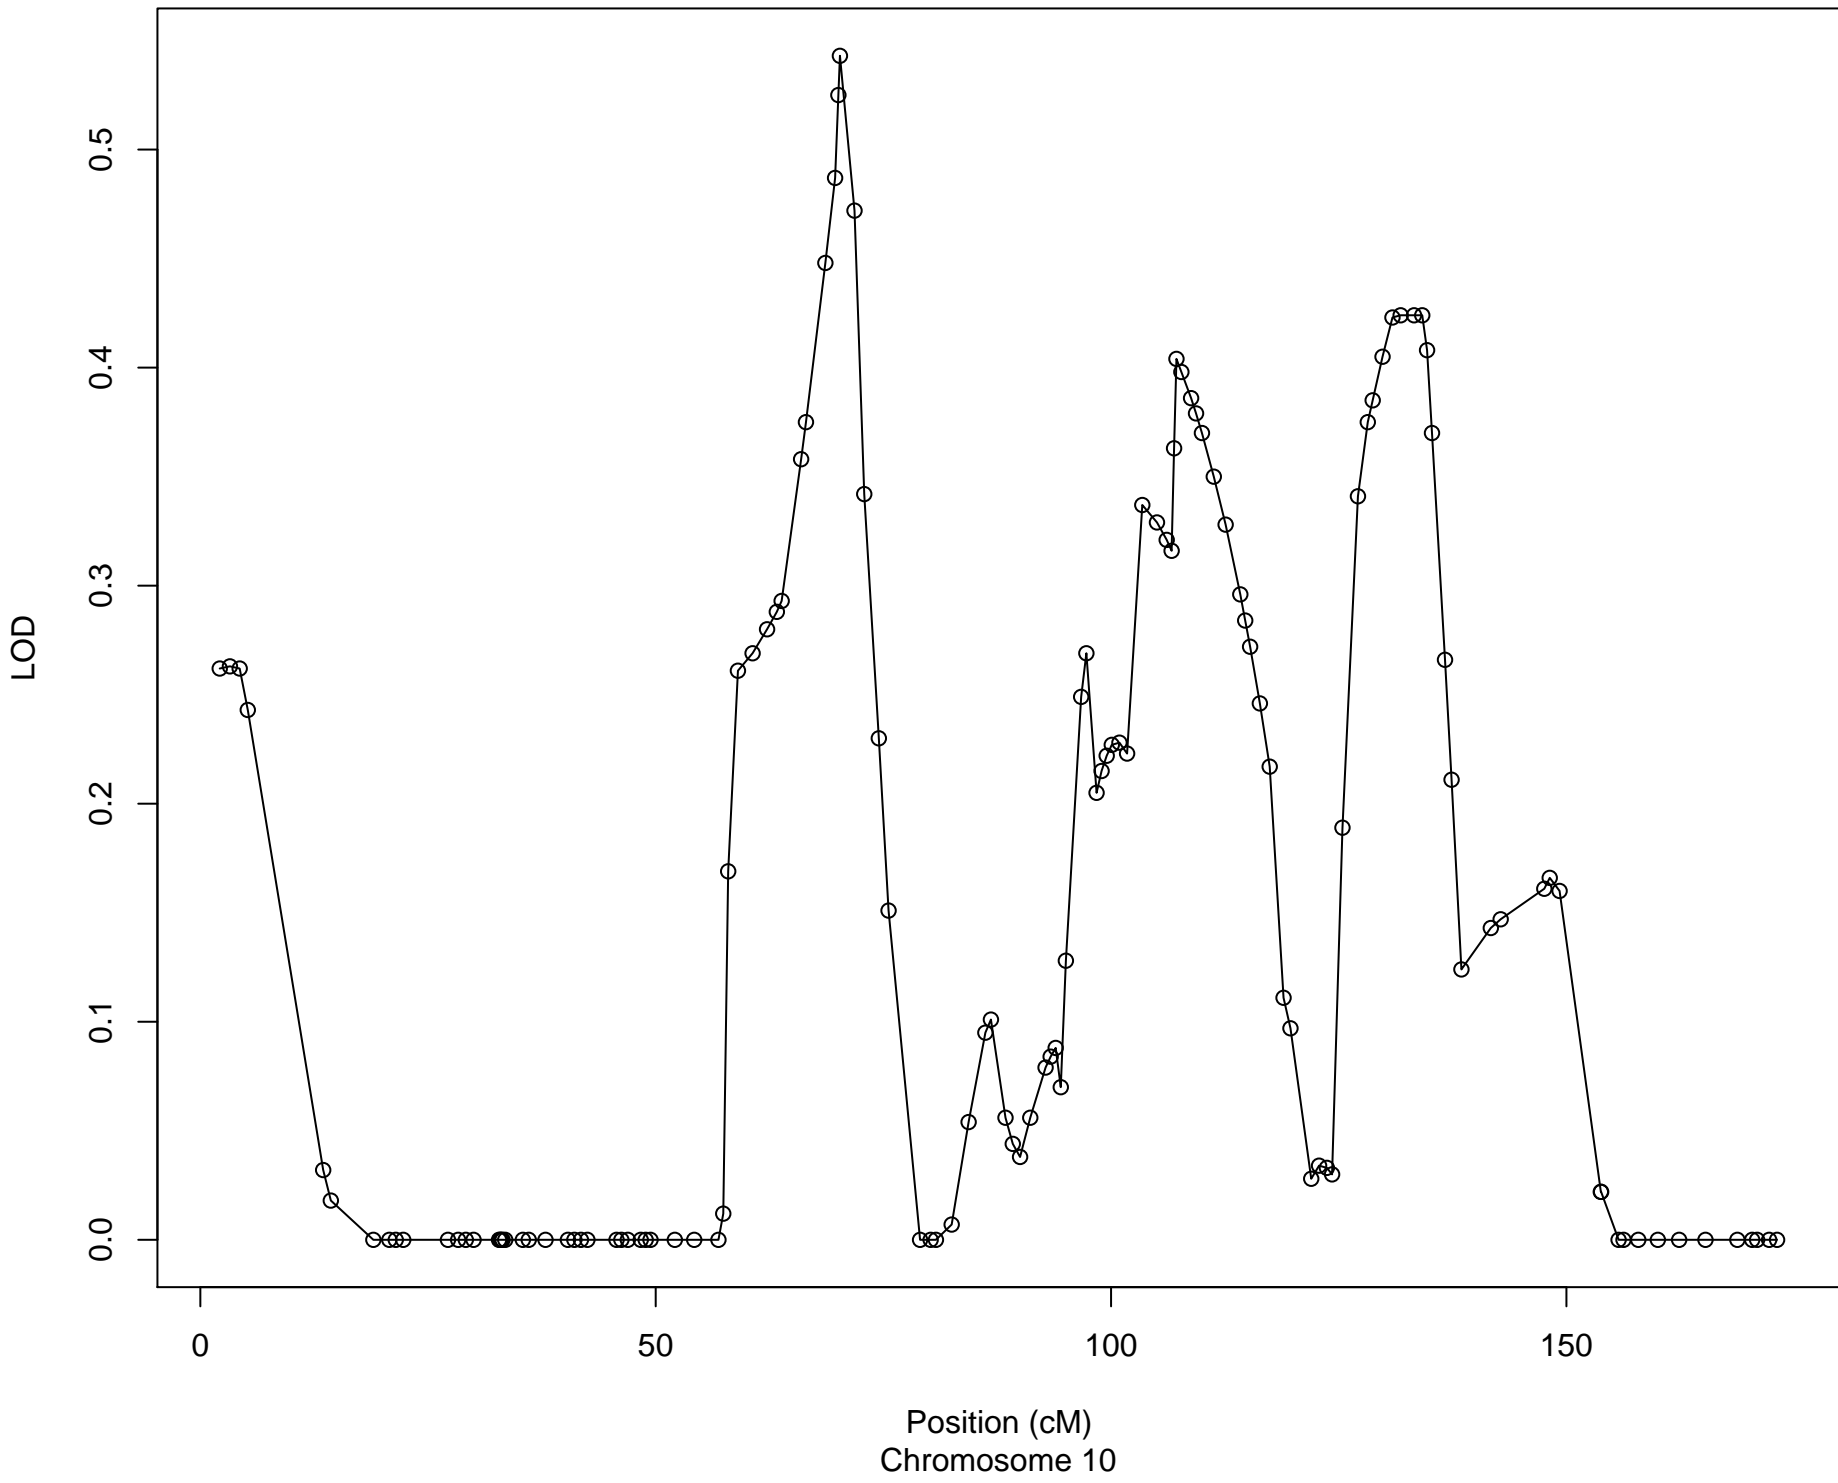

# IC50 (9-nitrocamptothecin) (IC50\_9NC)

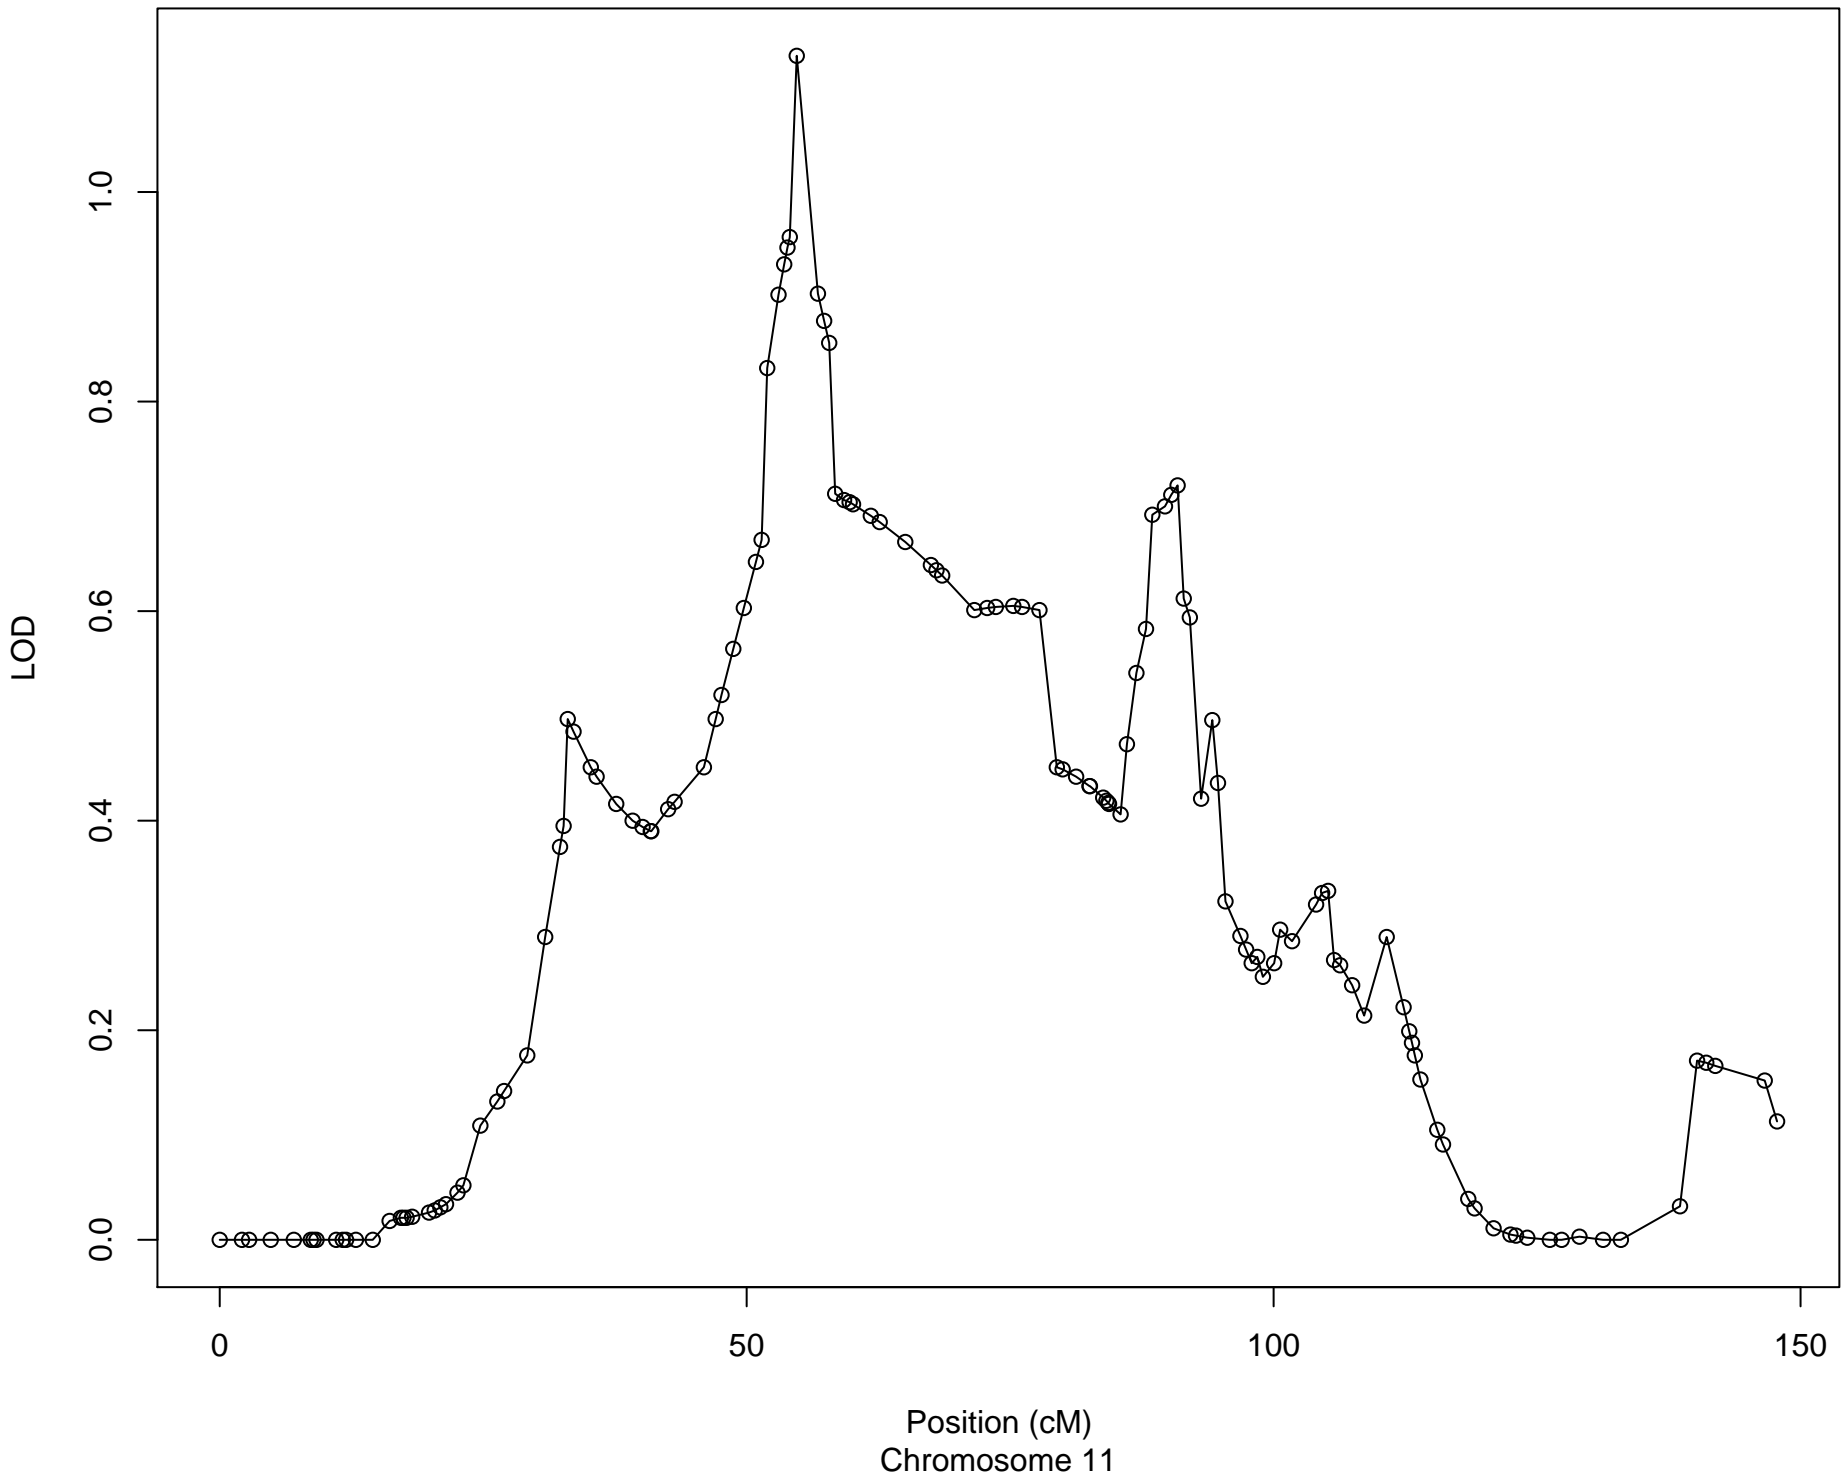

# IC50 (9-nitrocamptothecin) (IC50\_9NC)

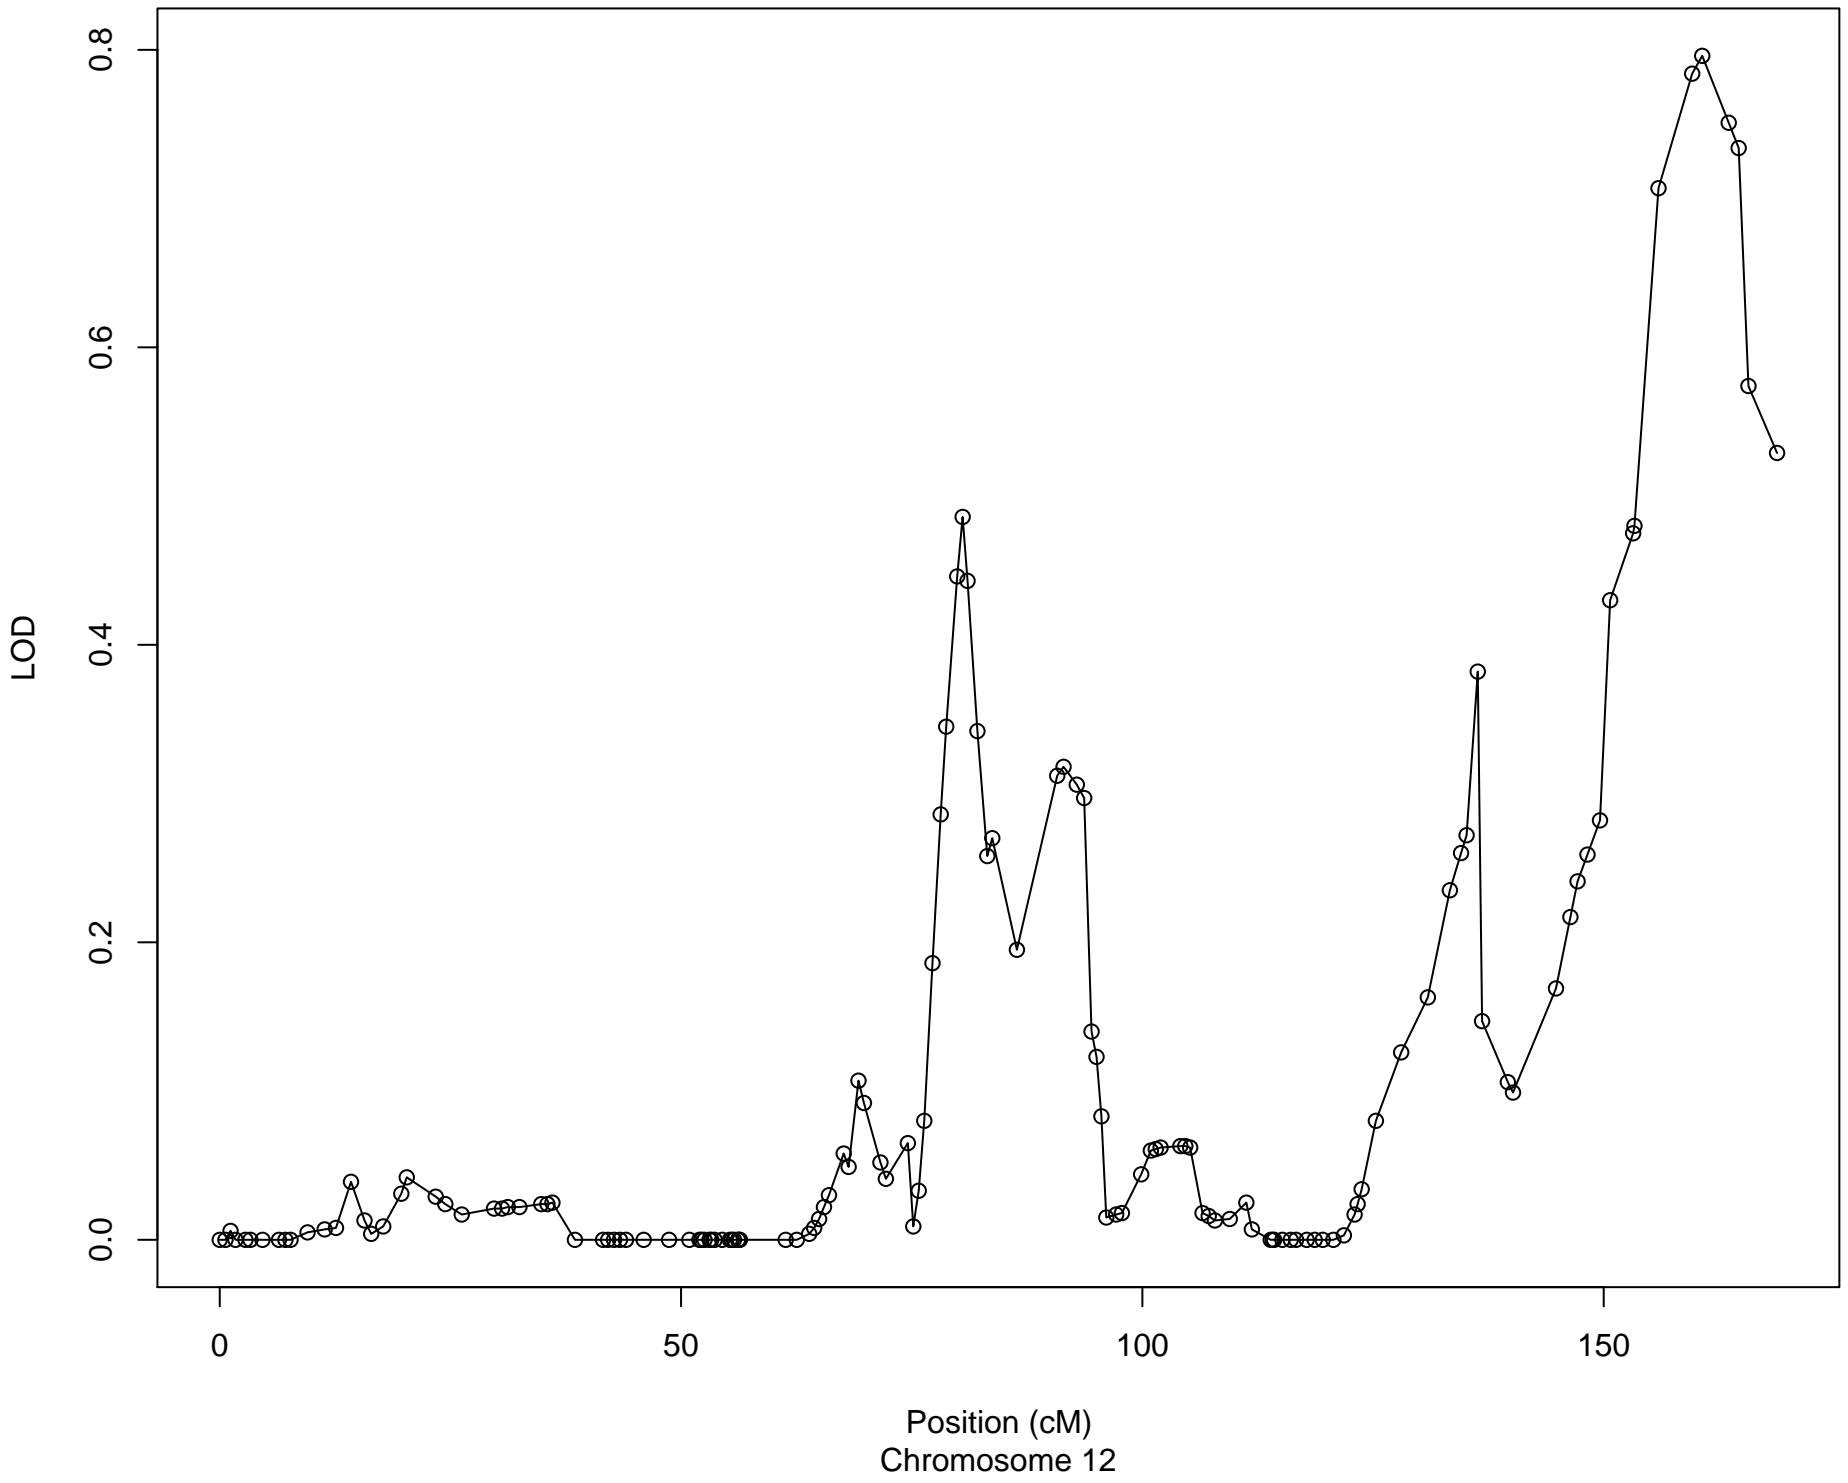



# IC50 (9-nitrocamptothecin) (IC50\_9NC)

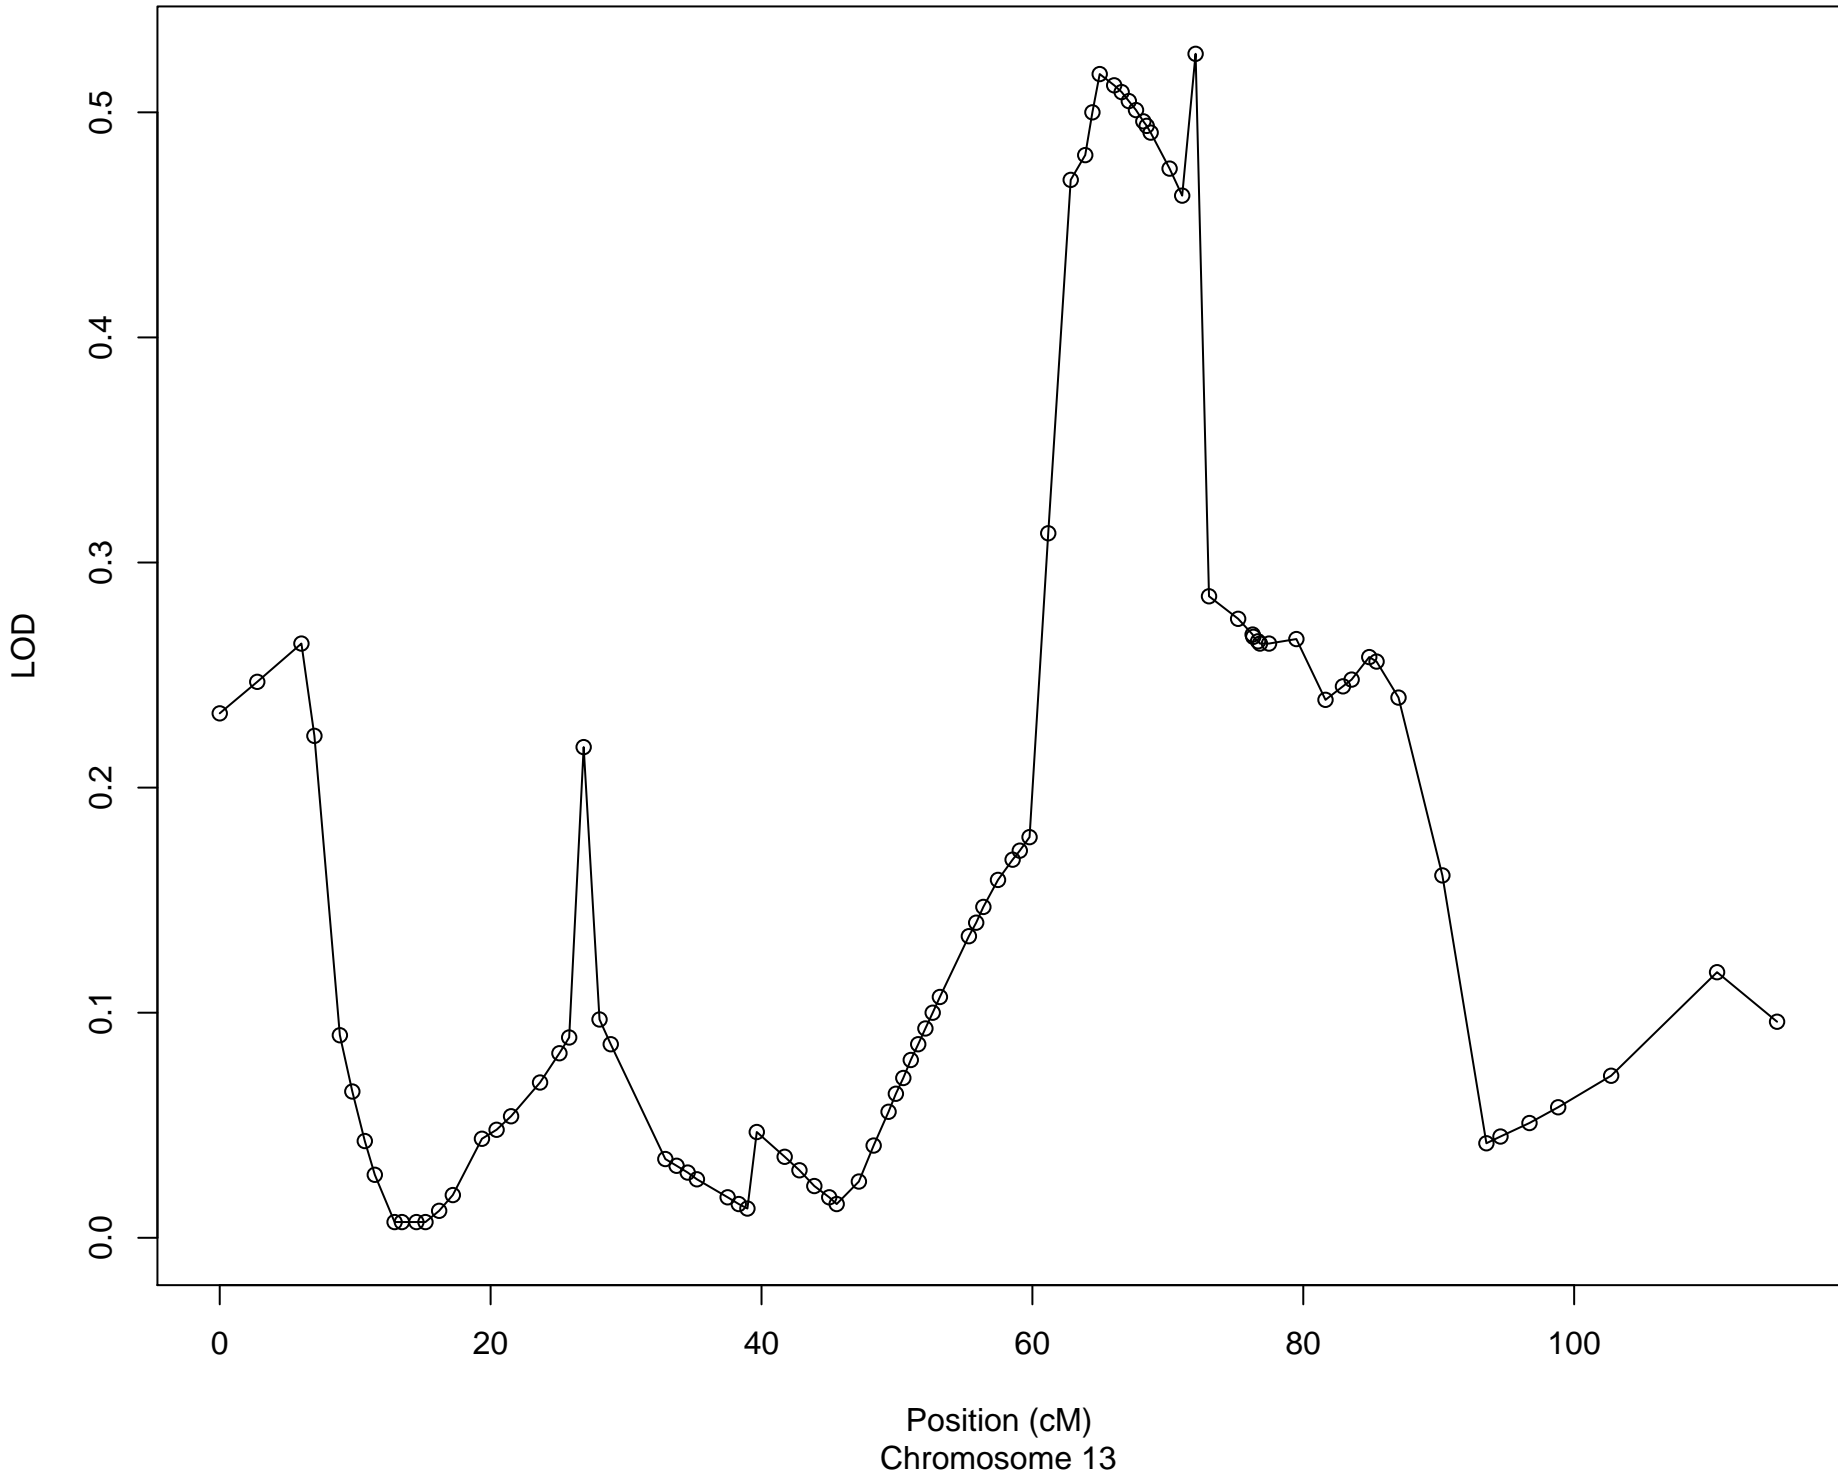

# IC50 (9-nitrocamptothecin) (IC50\_9NC)

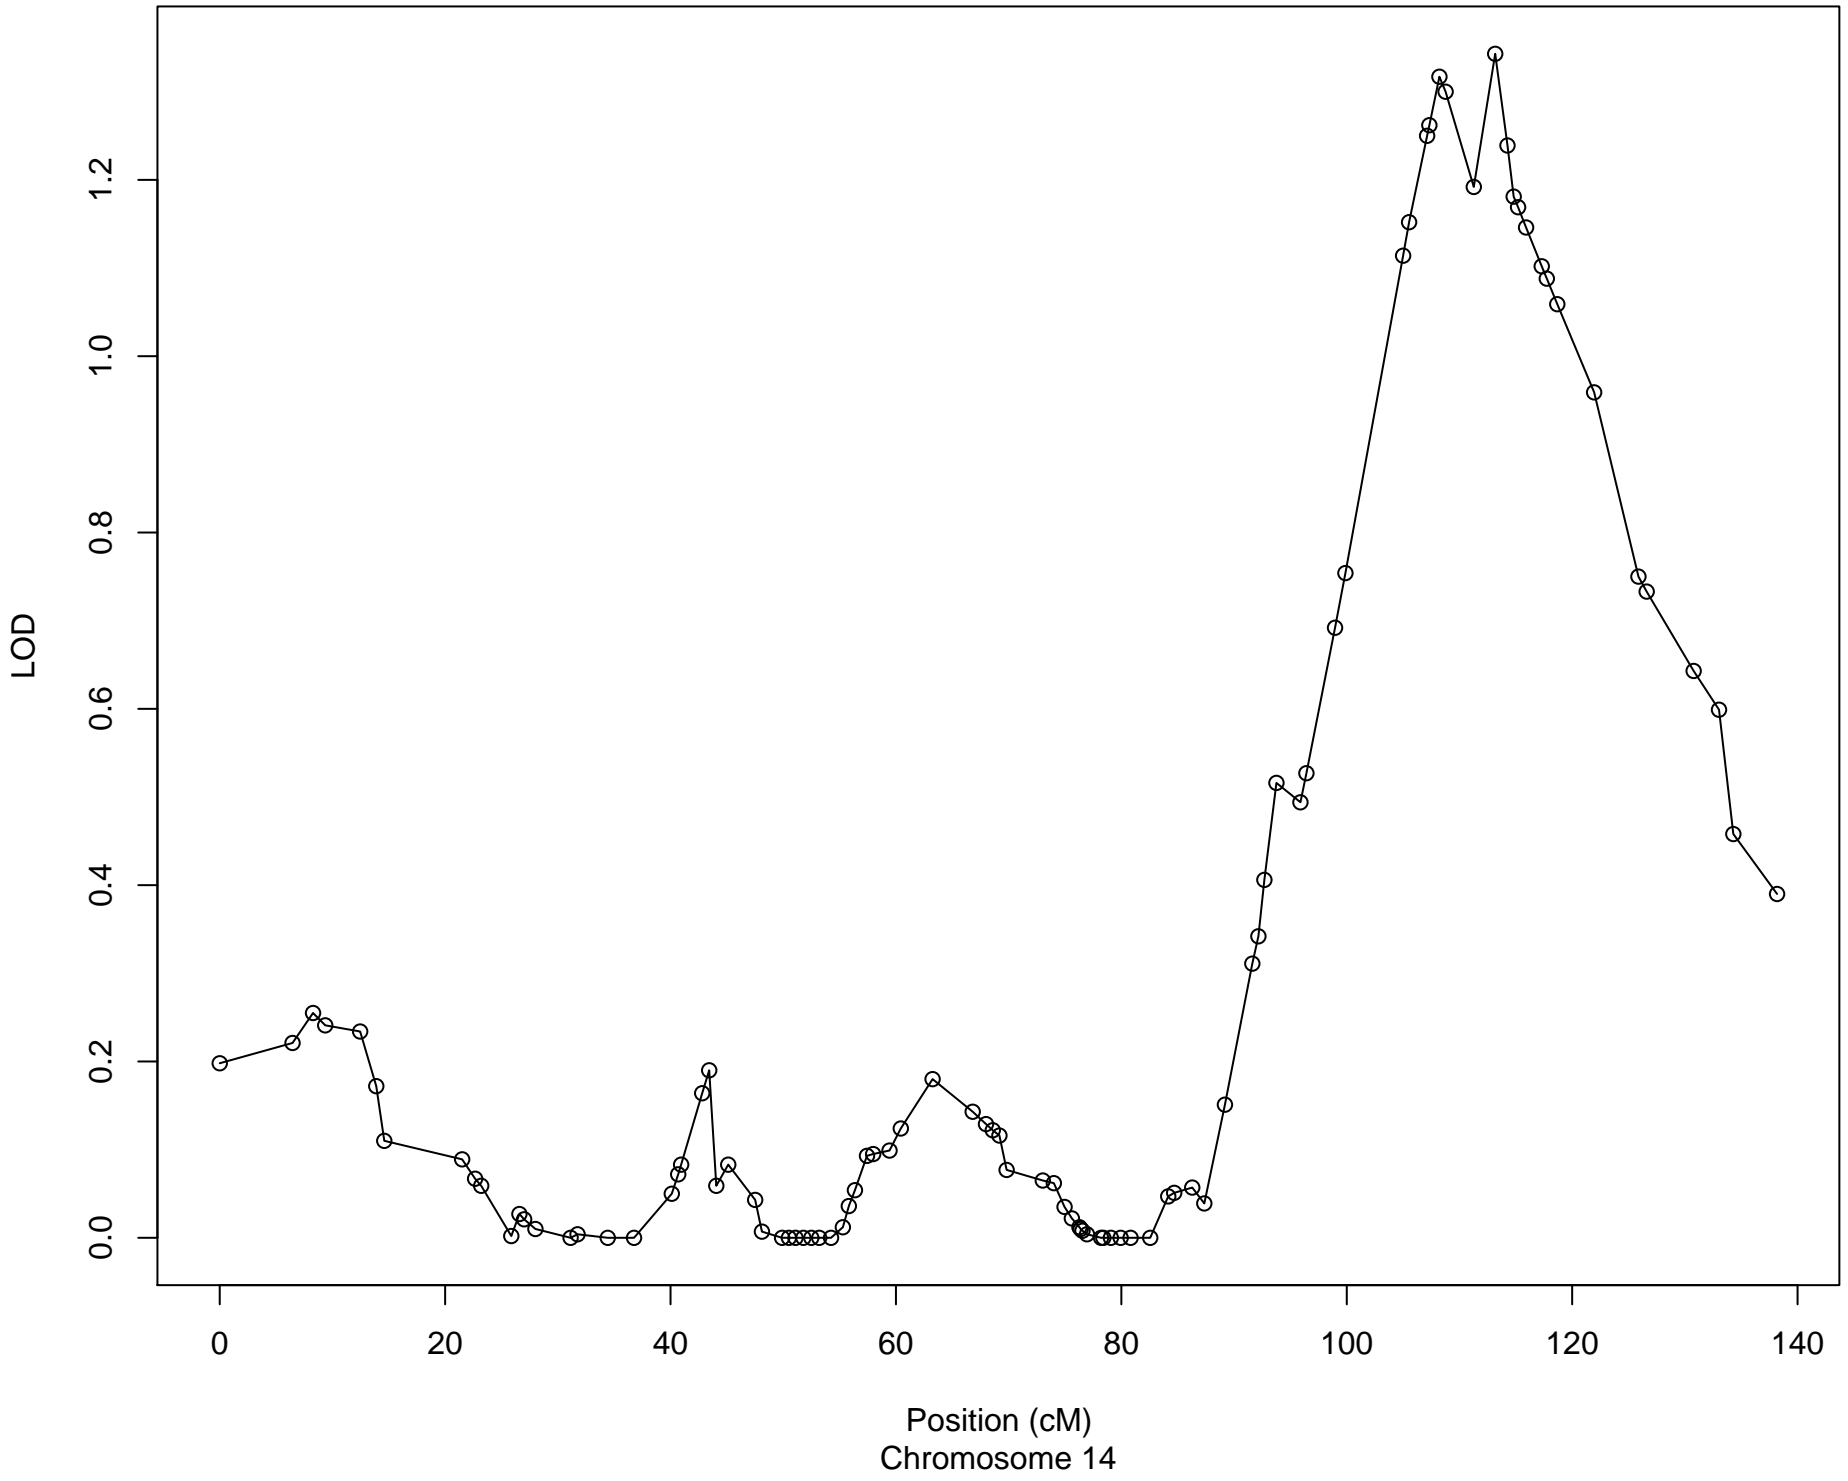

# IC50 (9-nitrocamptothecin) (IC50\_9NC)

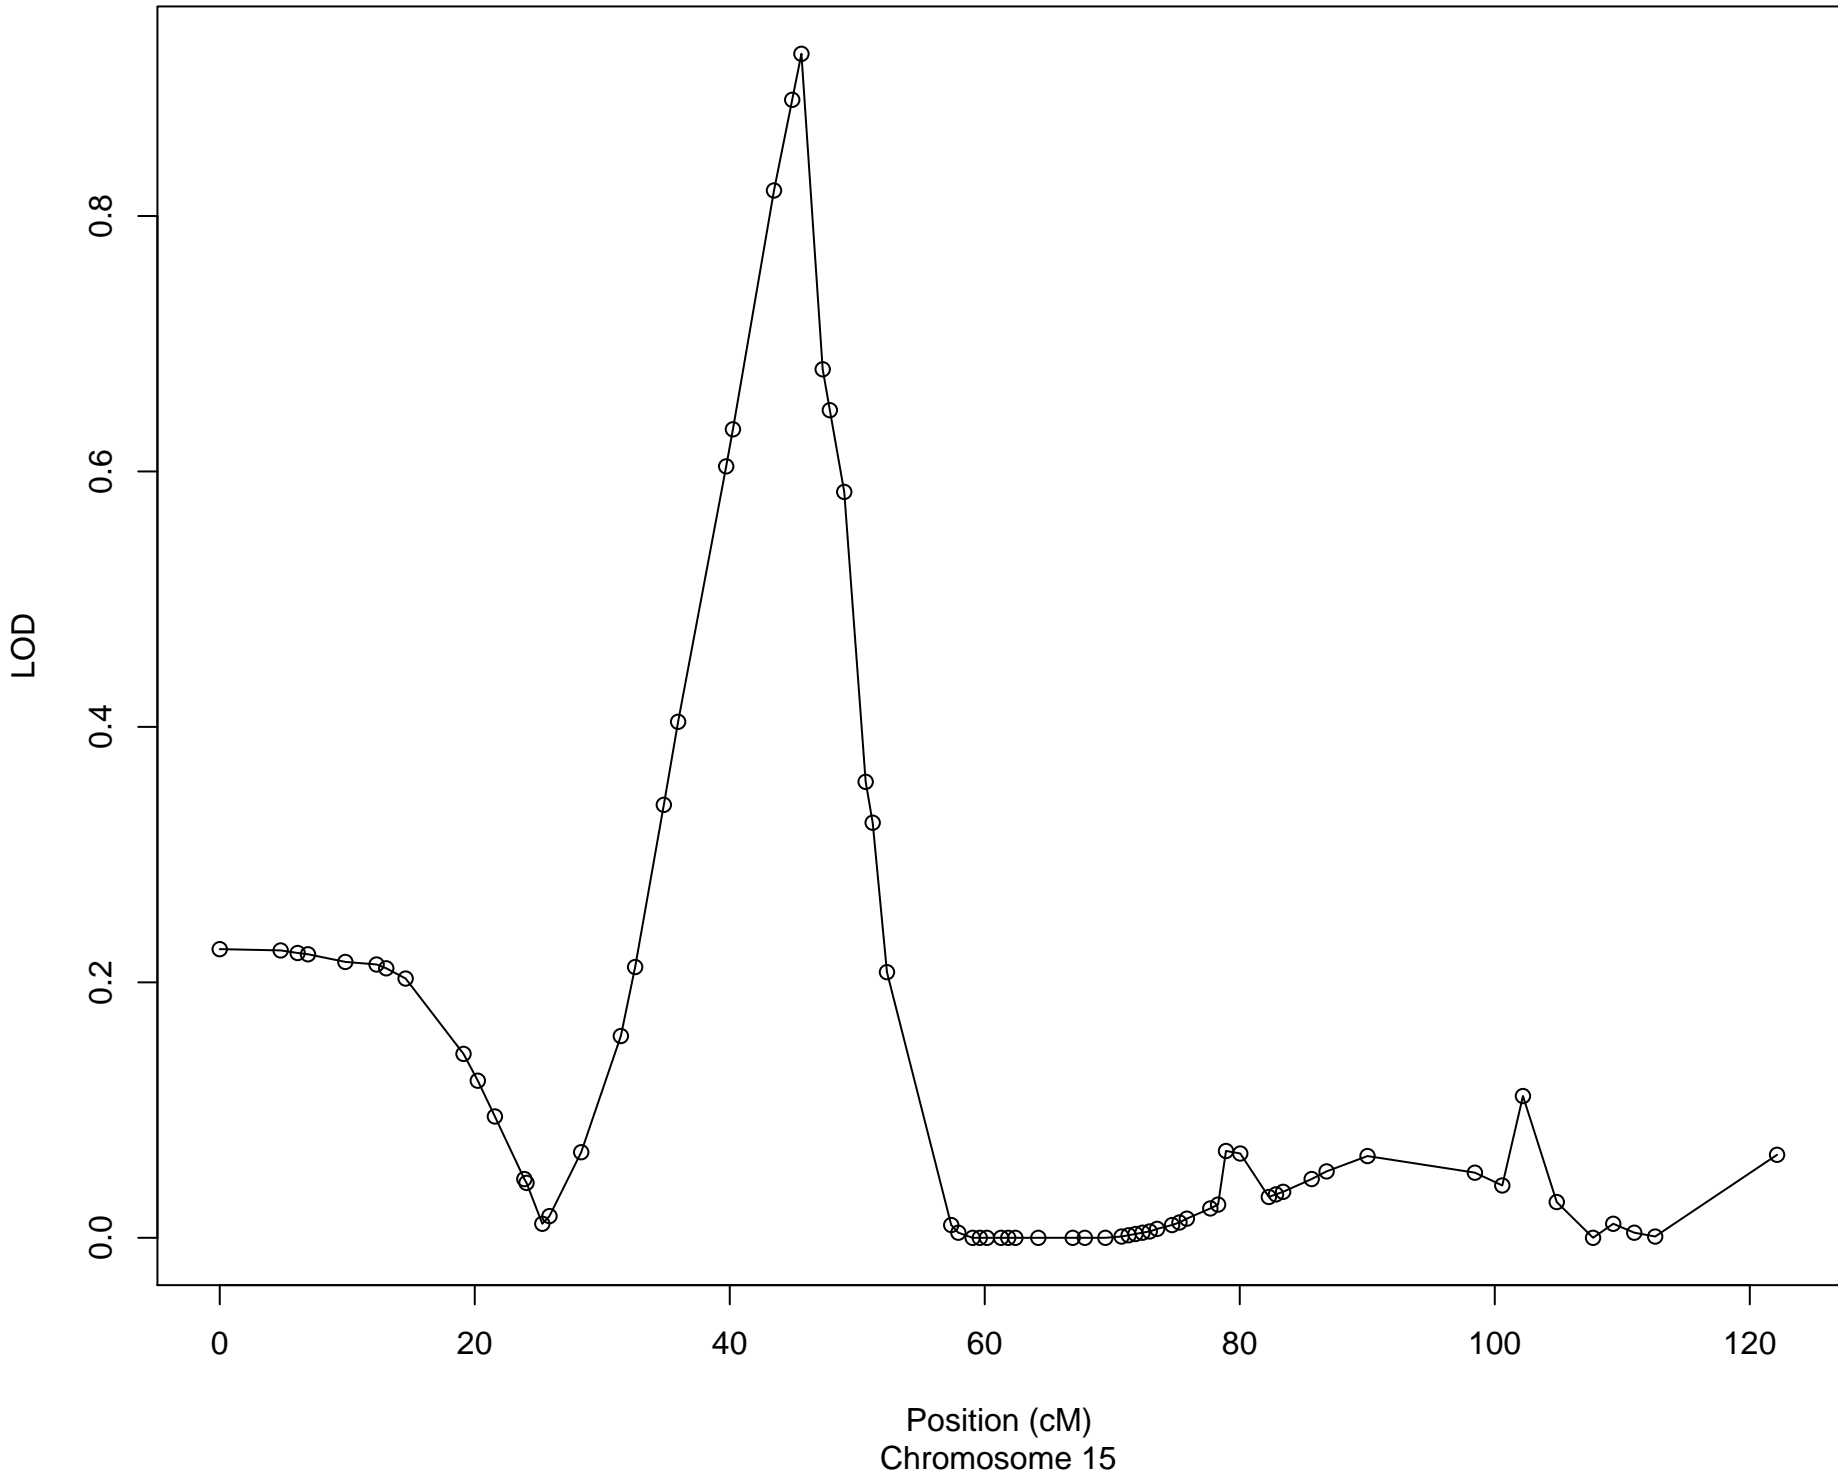

# IC50 (9-nitrocamptothecin) (IC50\_9NC)

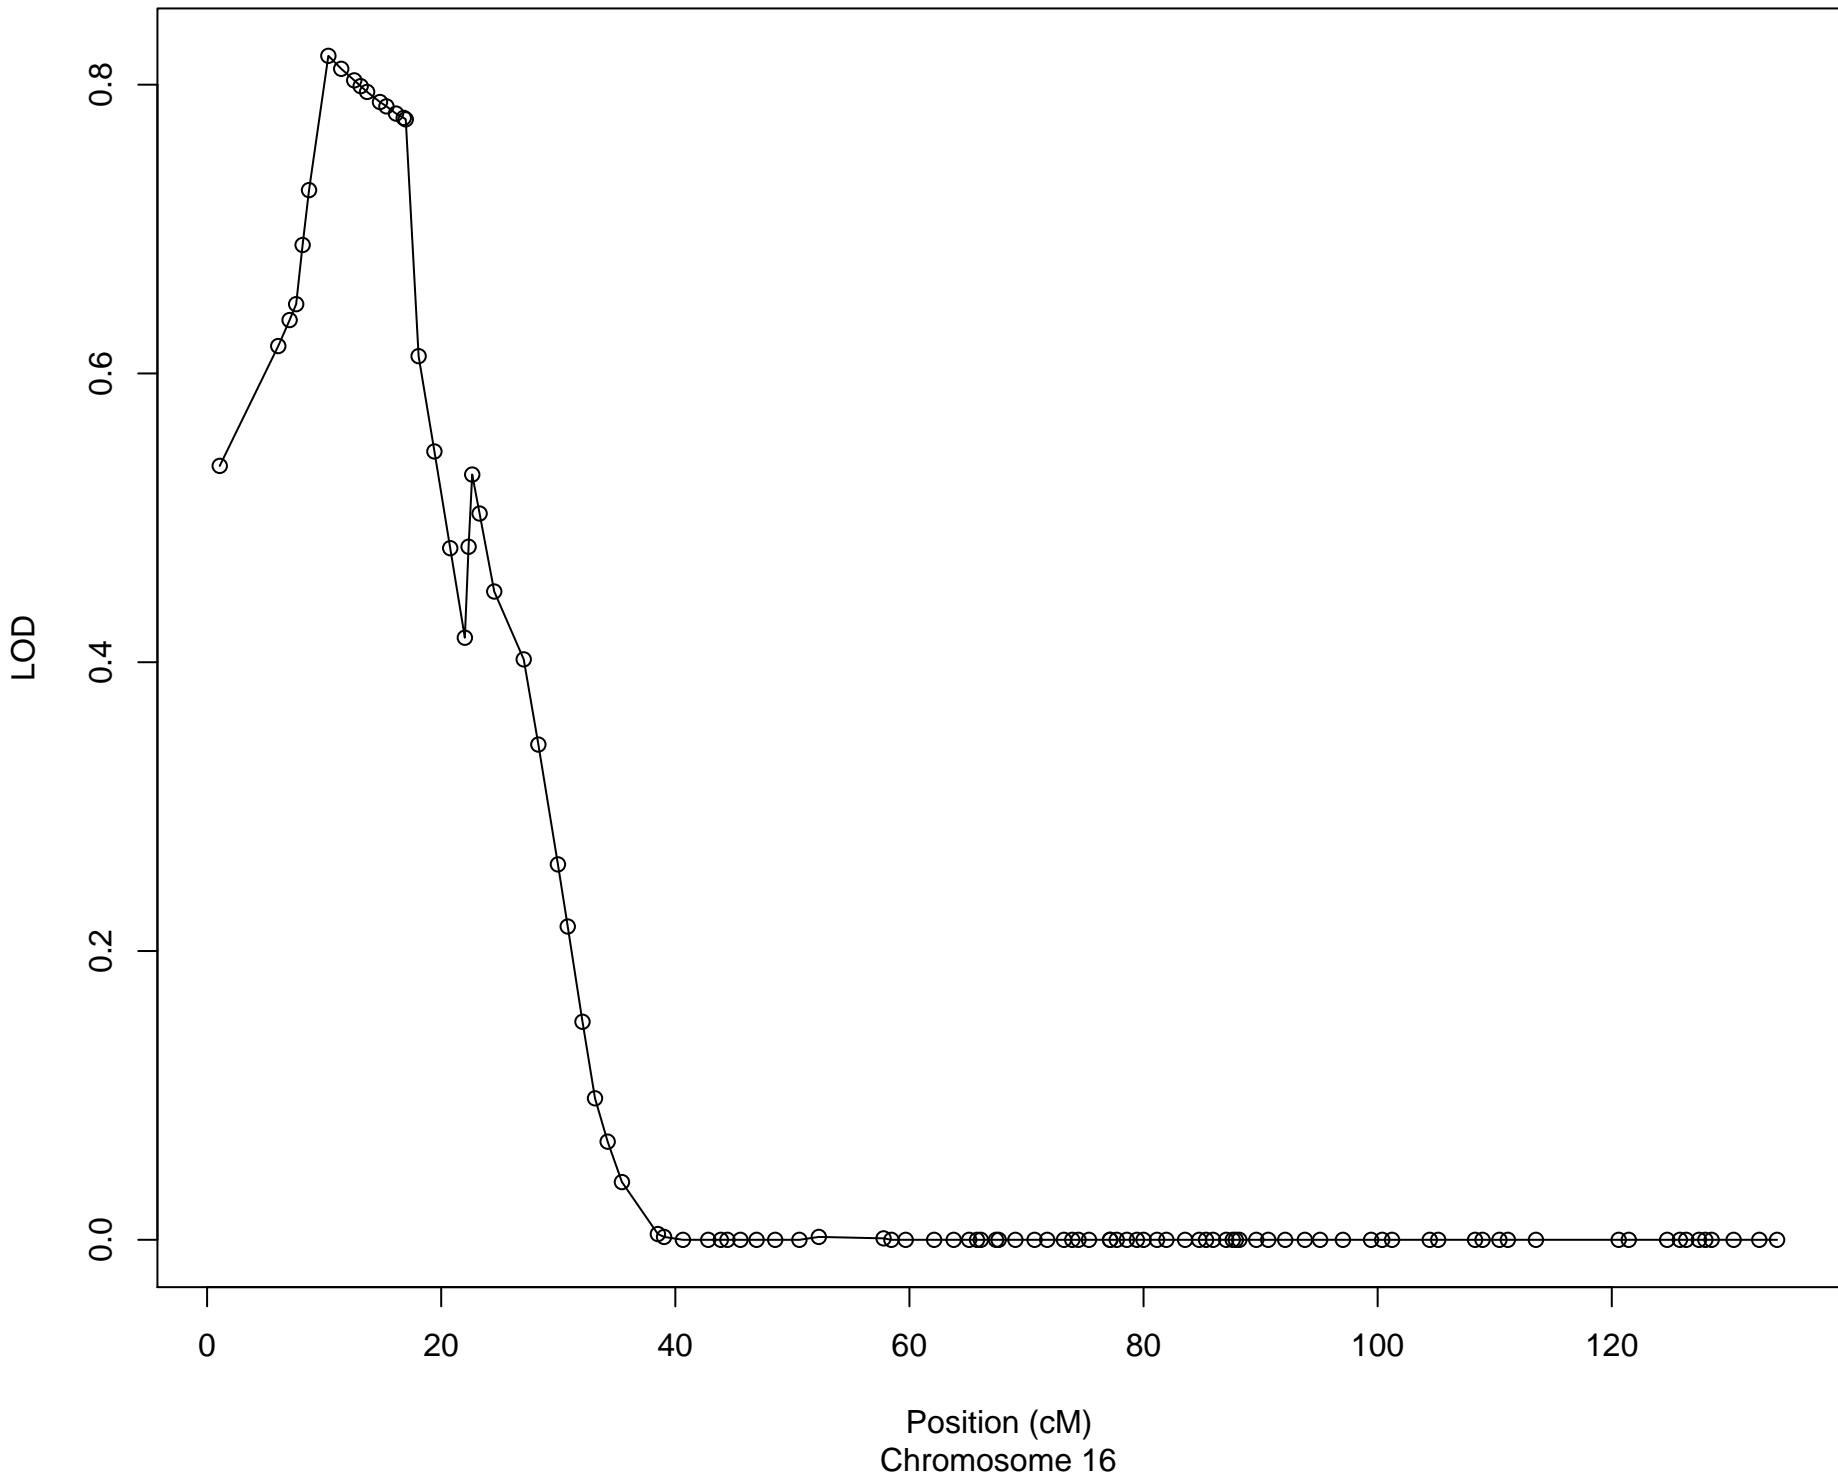

# IC50 (9-nitrocamptothecin) (IC50\_9NC)

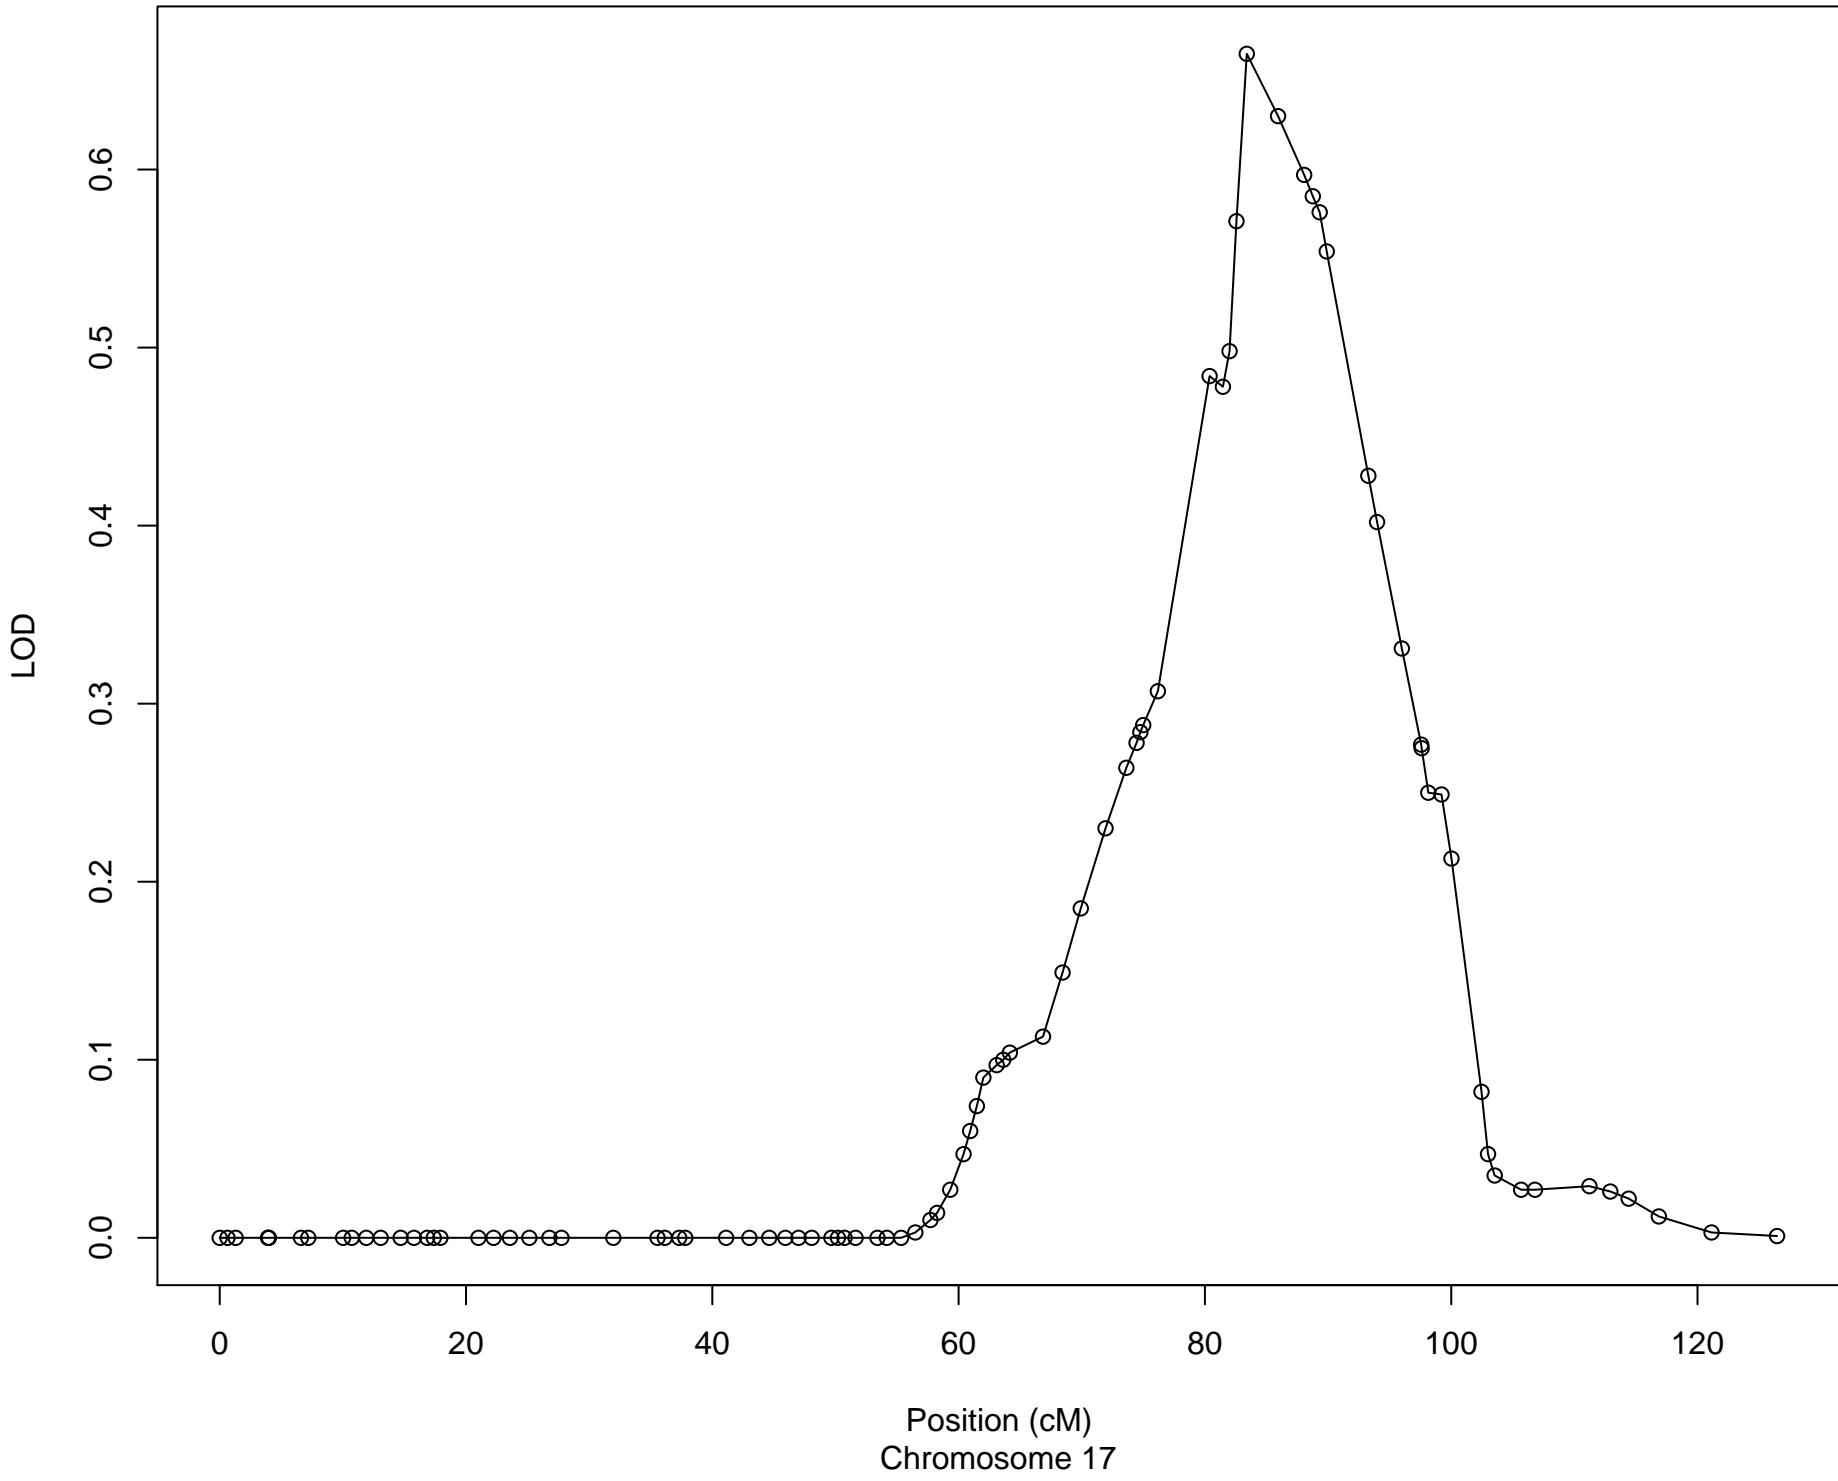

# IC50 (9-nitrocamptothecin) (IC50\_9NC)

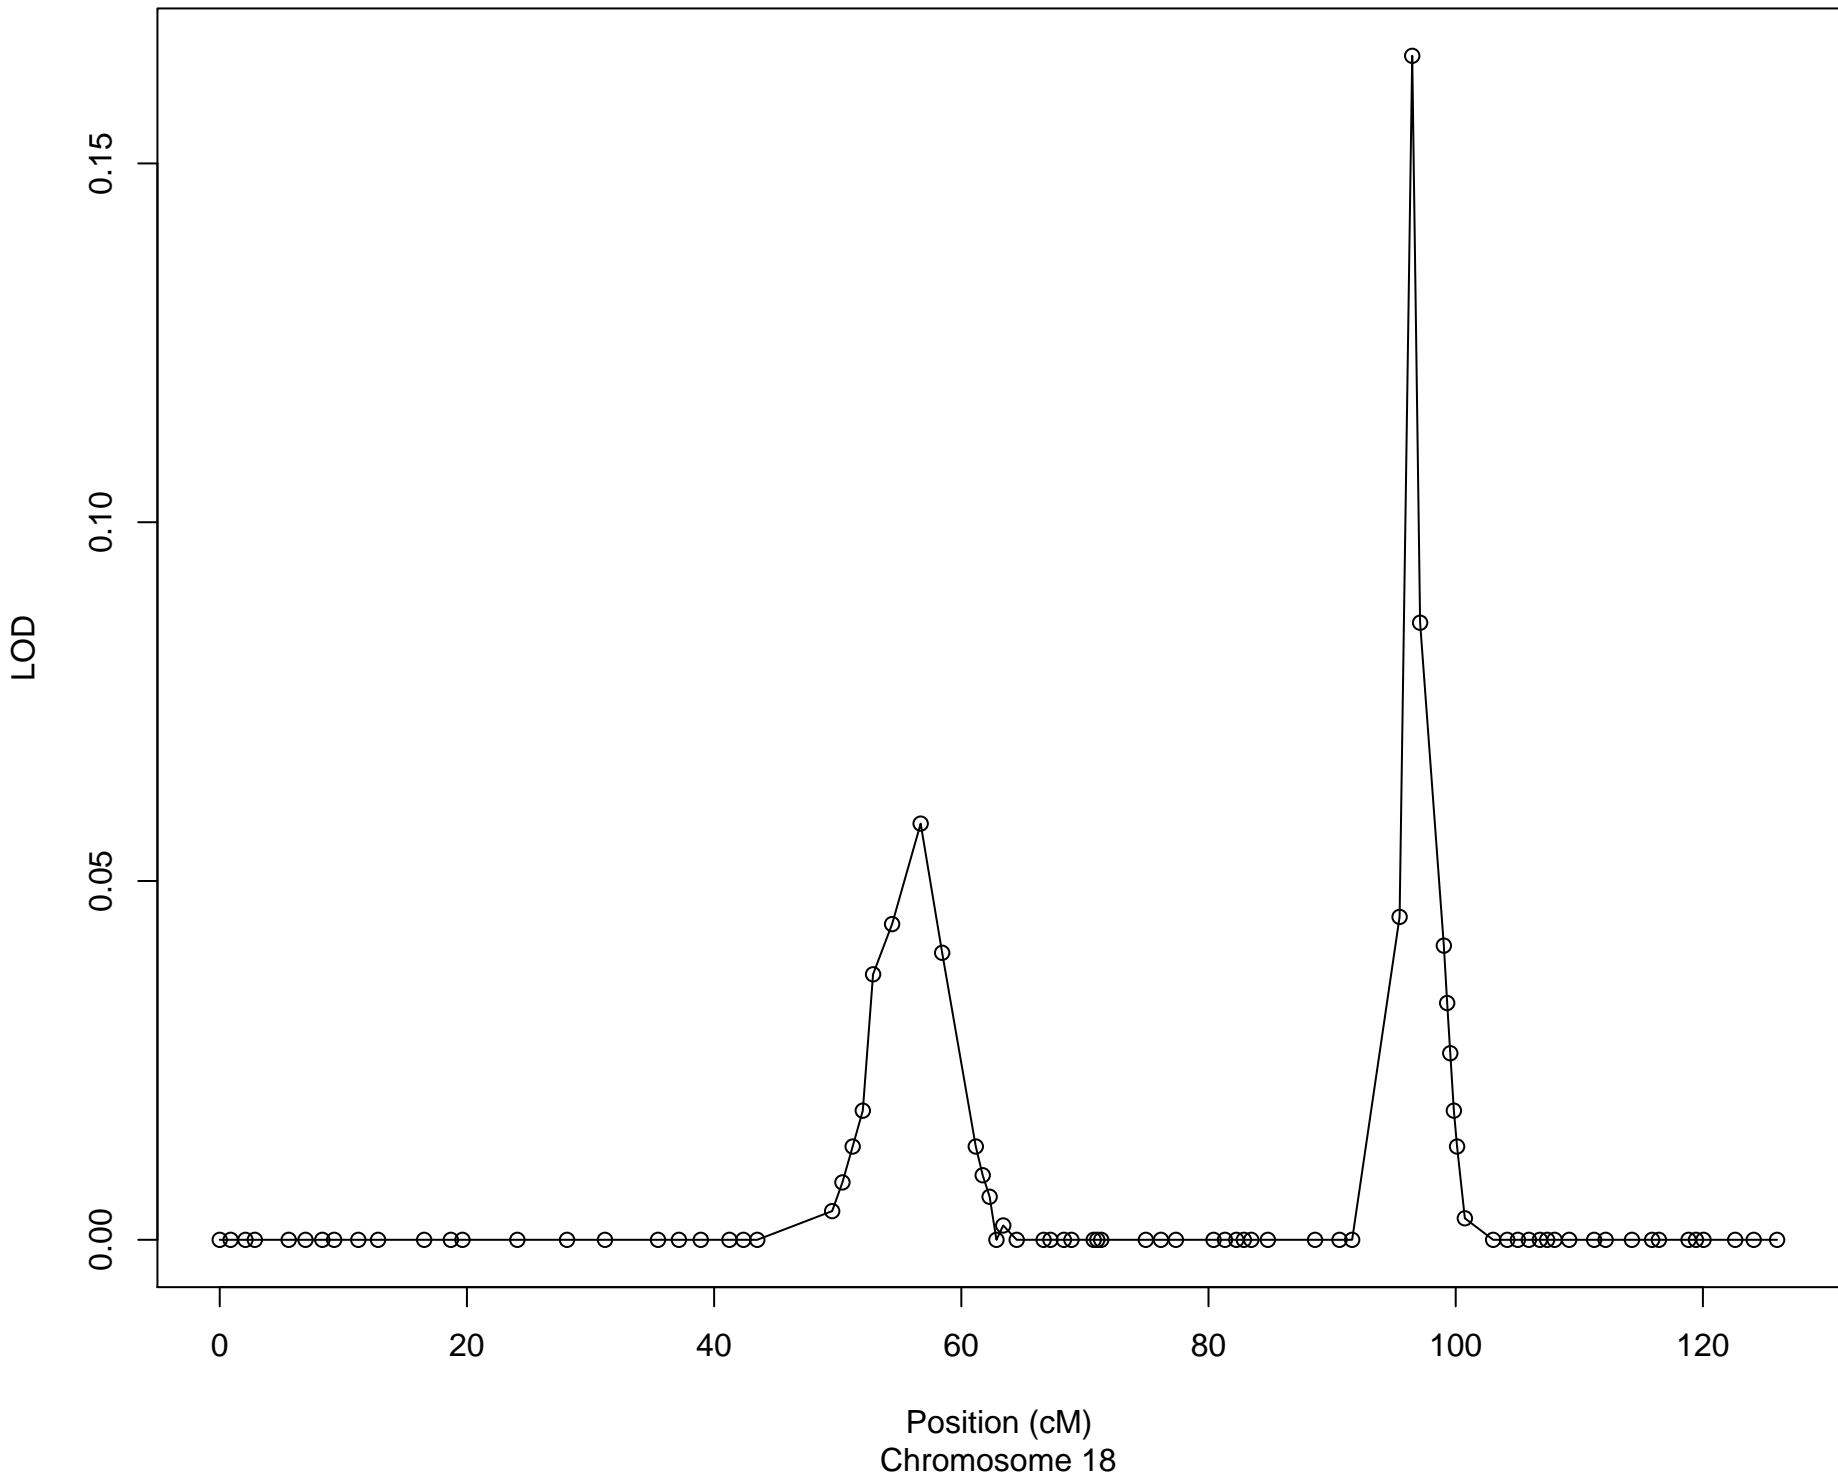

# IC50 (9-nitrocamptothecin) (IC50\_9NC)

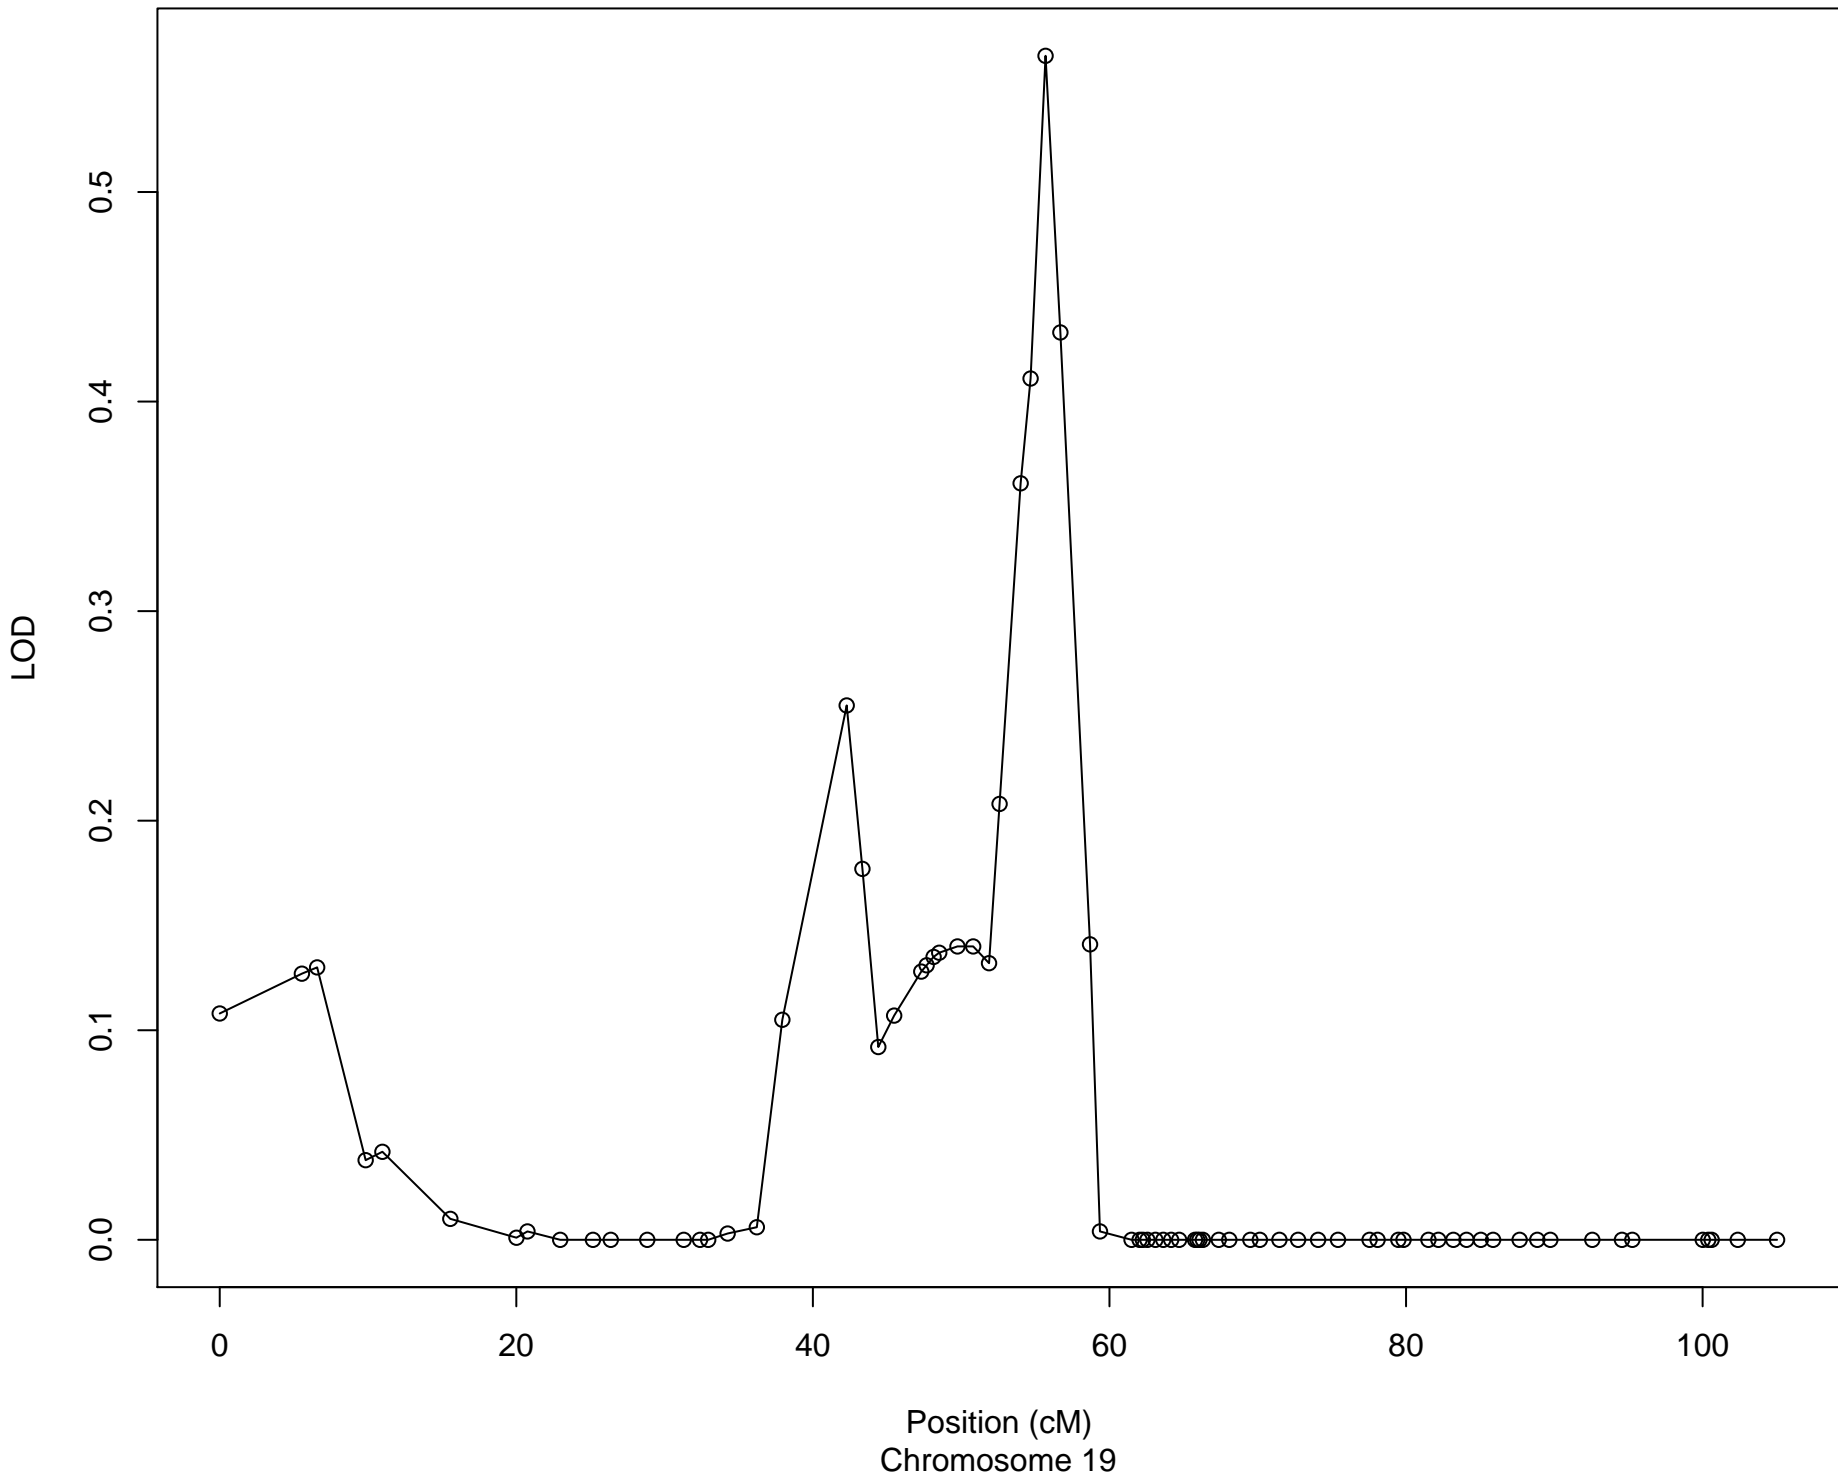

# IC50 (9-nitrocamptothecin) (IC50\_9NC)

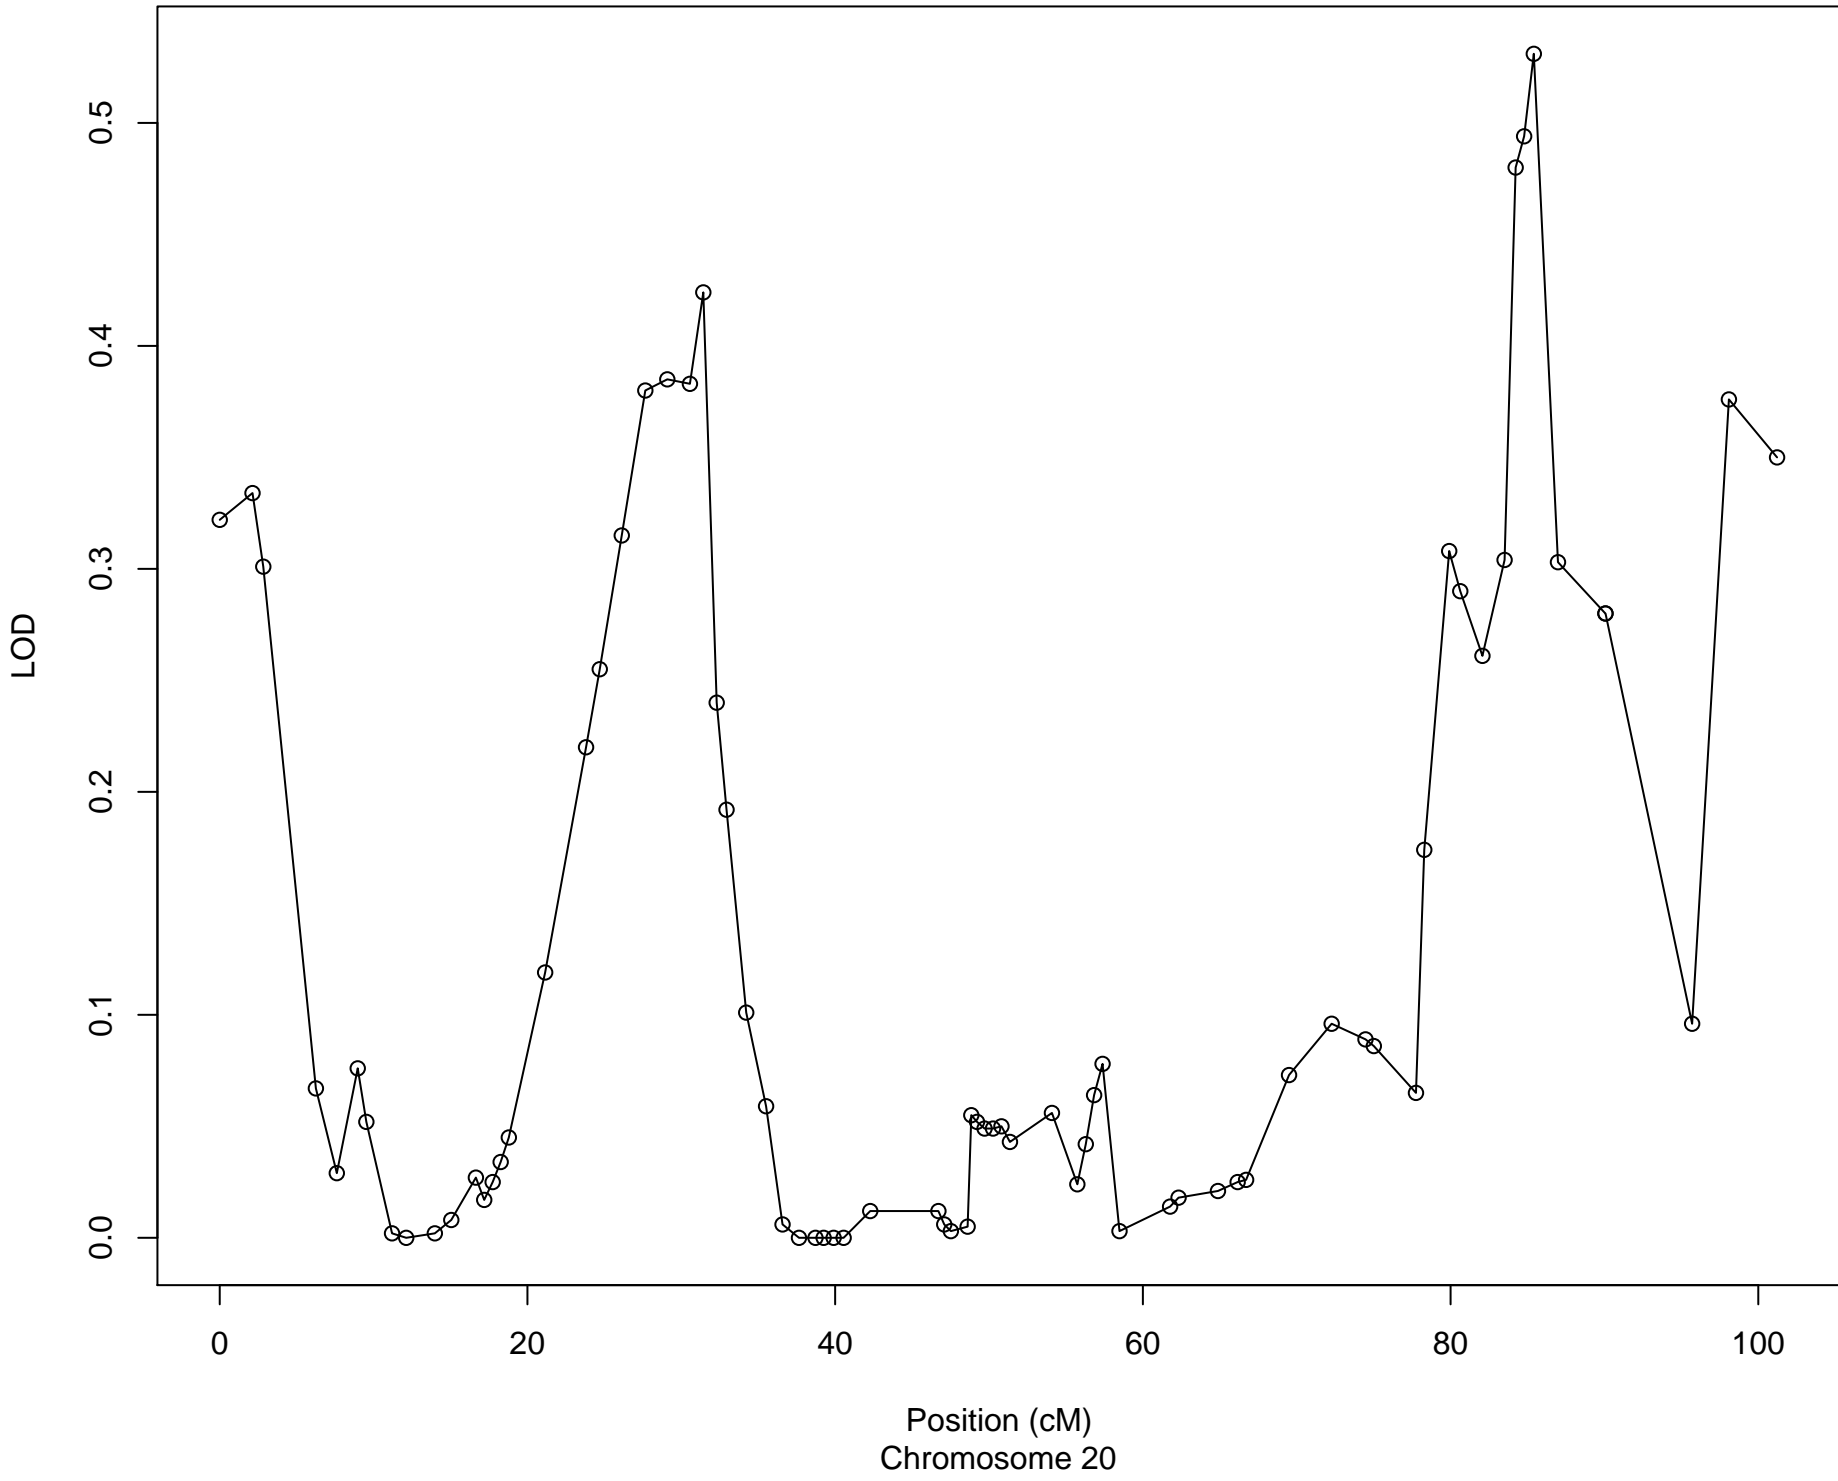



# IC50 (9-nitrocamptothecin) (IC50\_9NC)

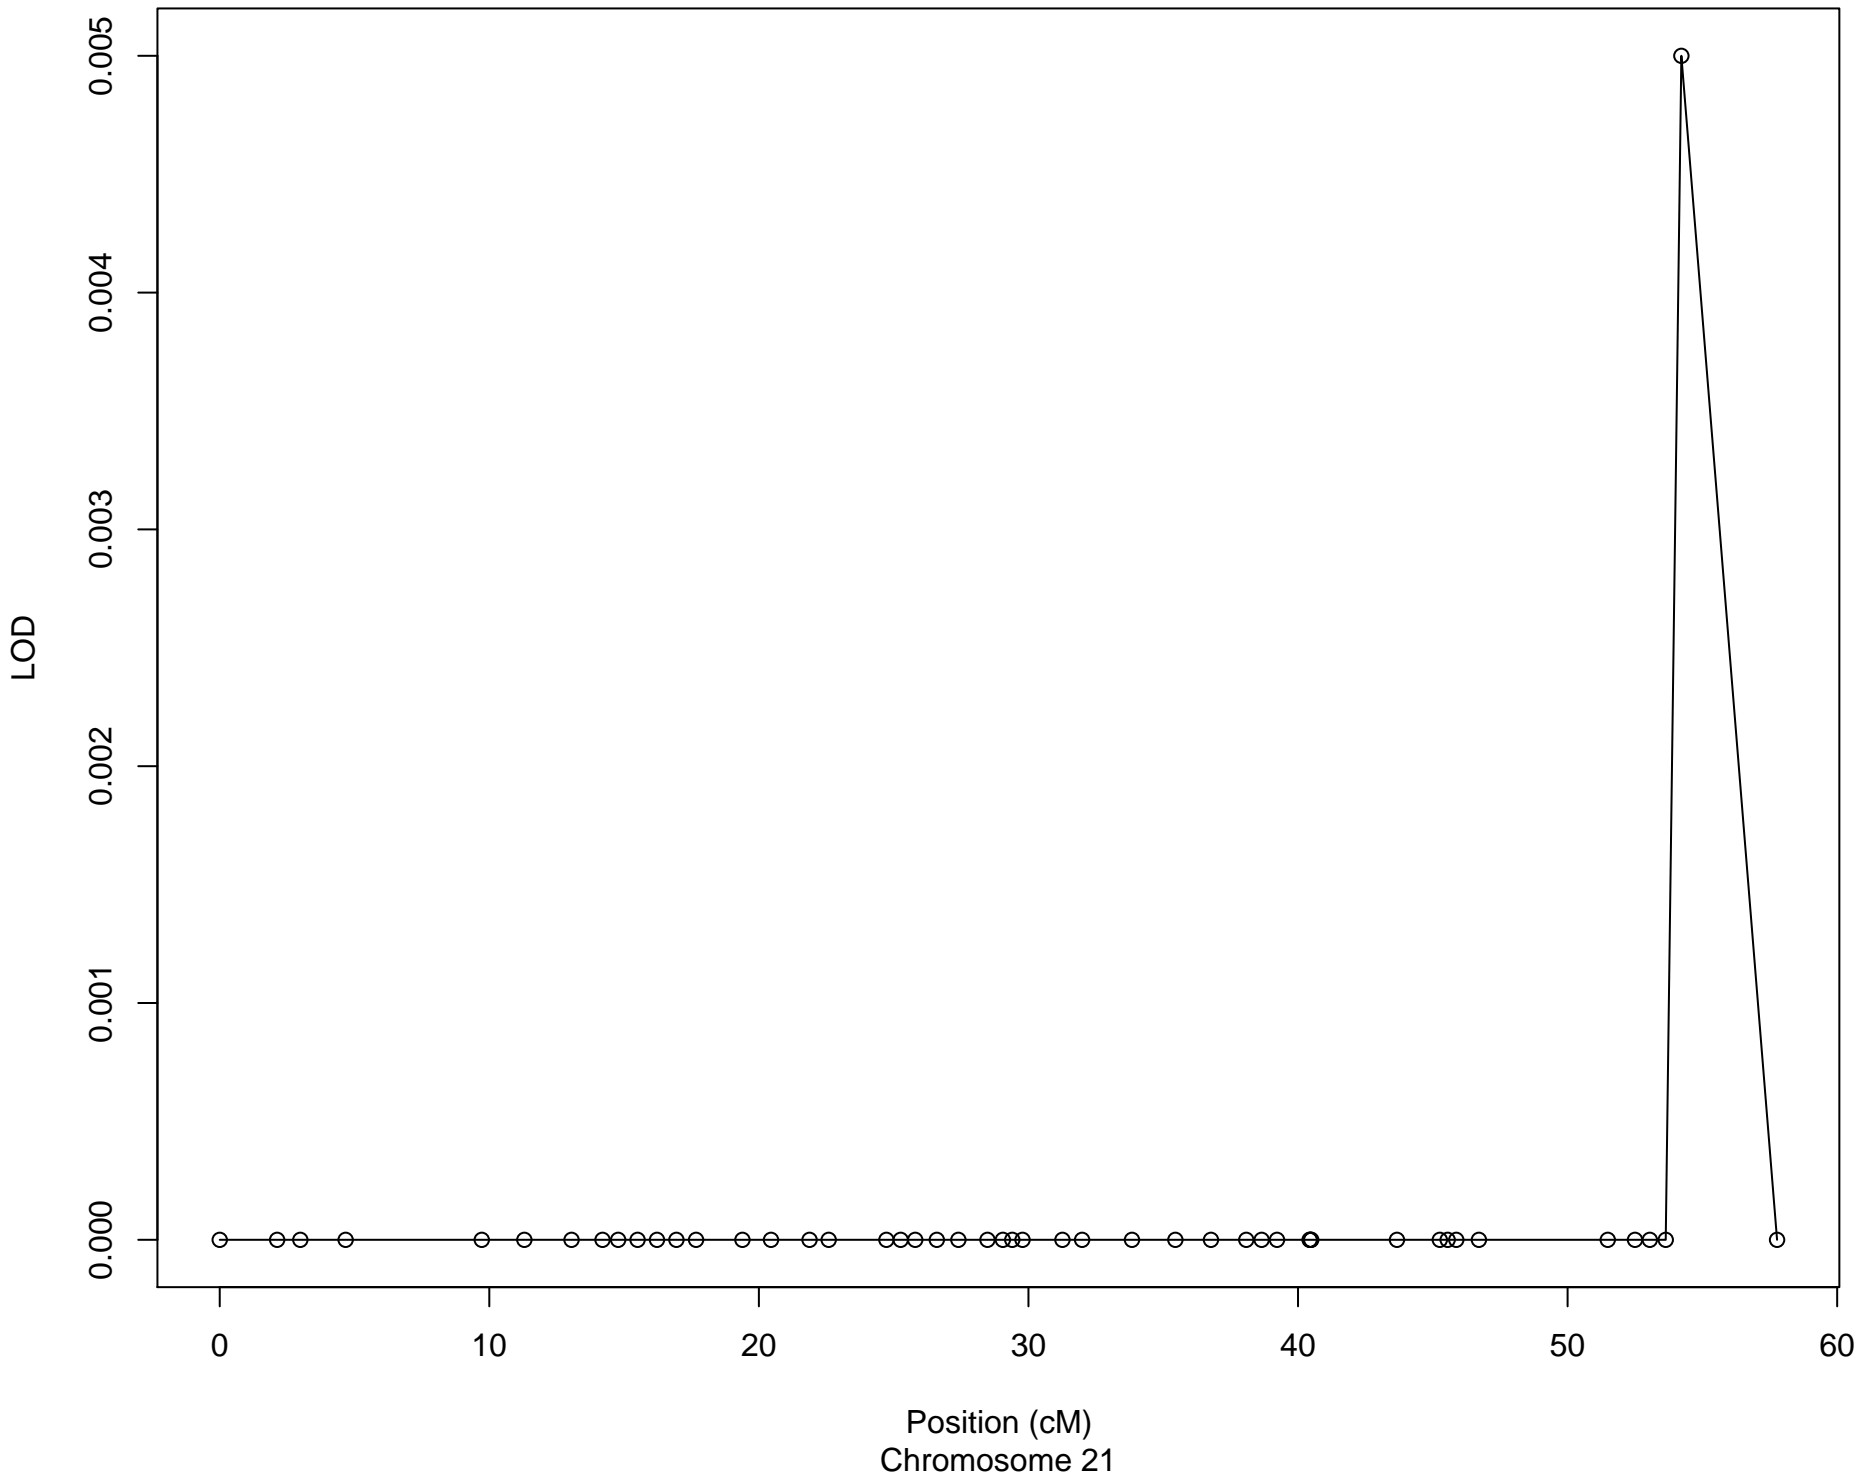

# IC50 (9-nitrocamptothecin) (IC50\_9NC)

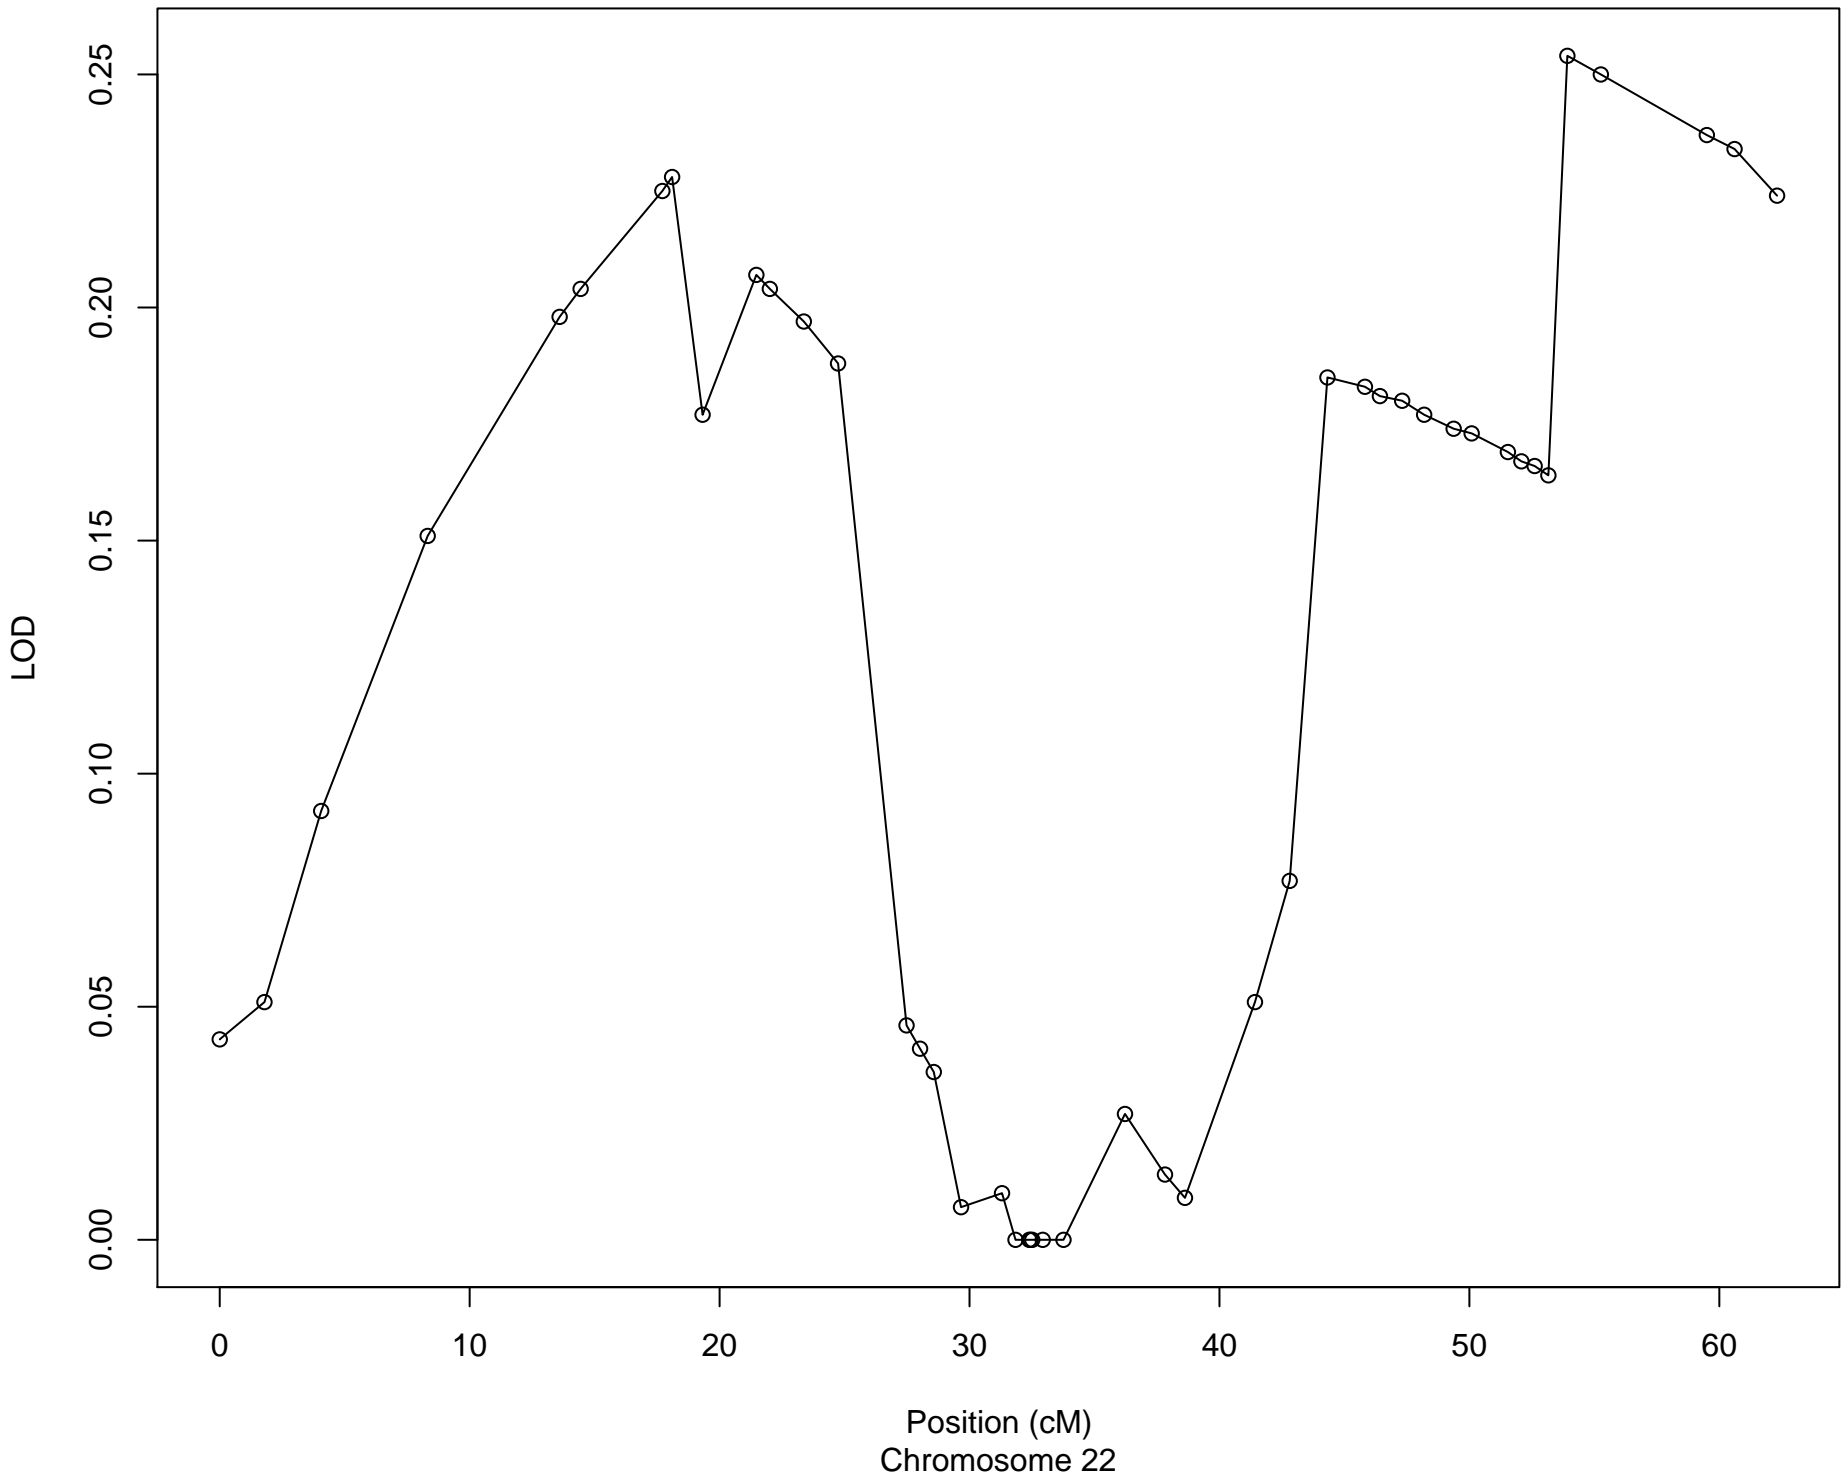

# IC50 (Camptothecin) (IC50\_CPT)

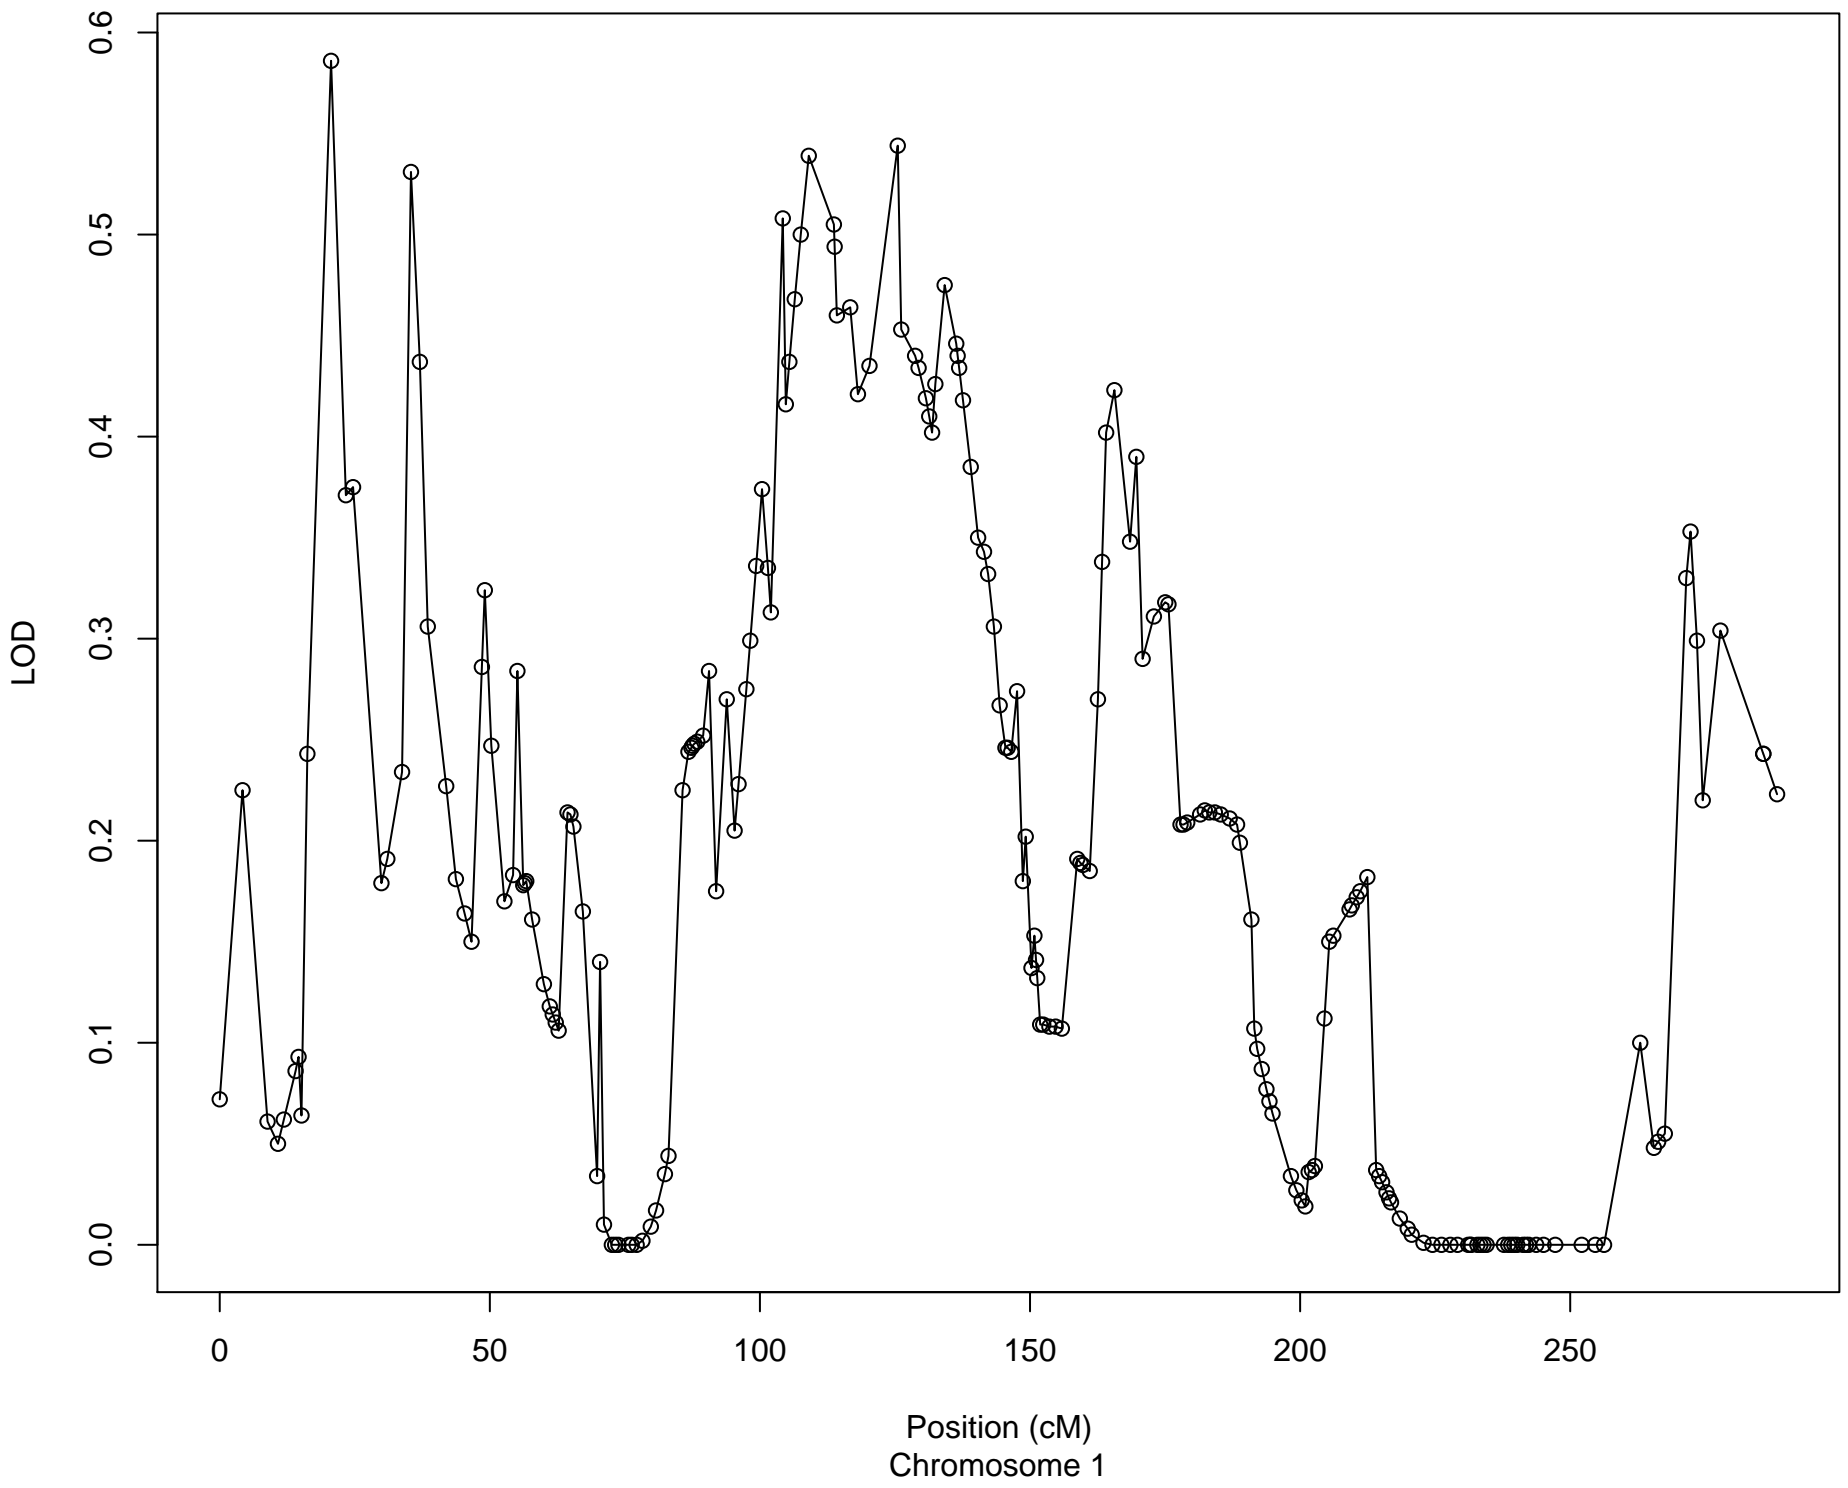

# IC50 (Camptothecin) (IC50\_CPT)

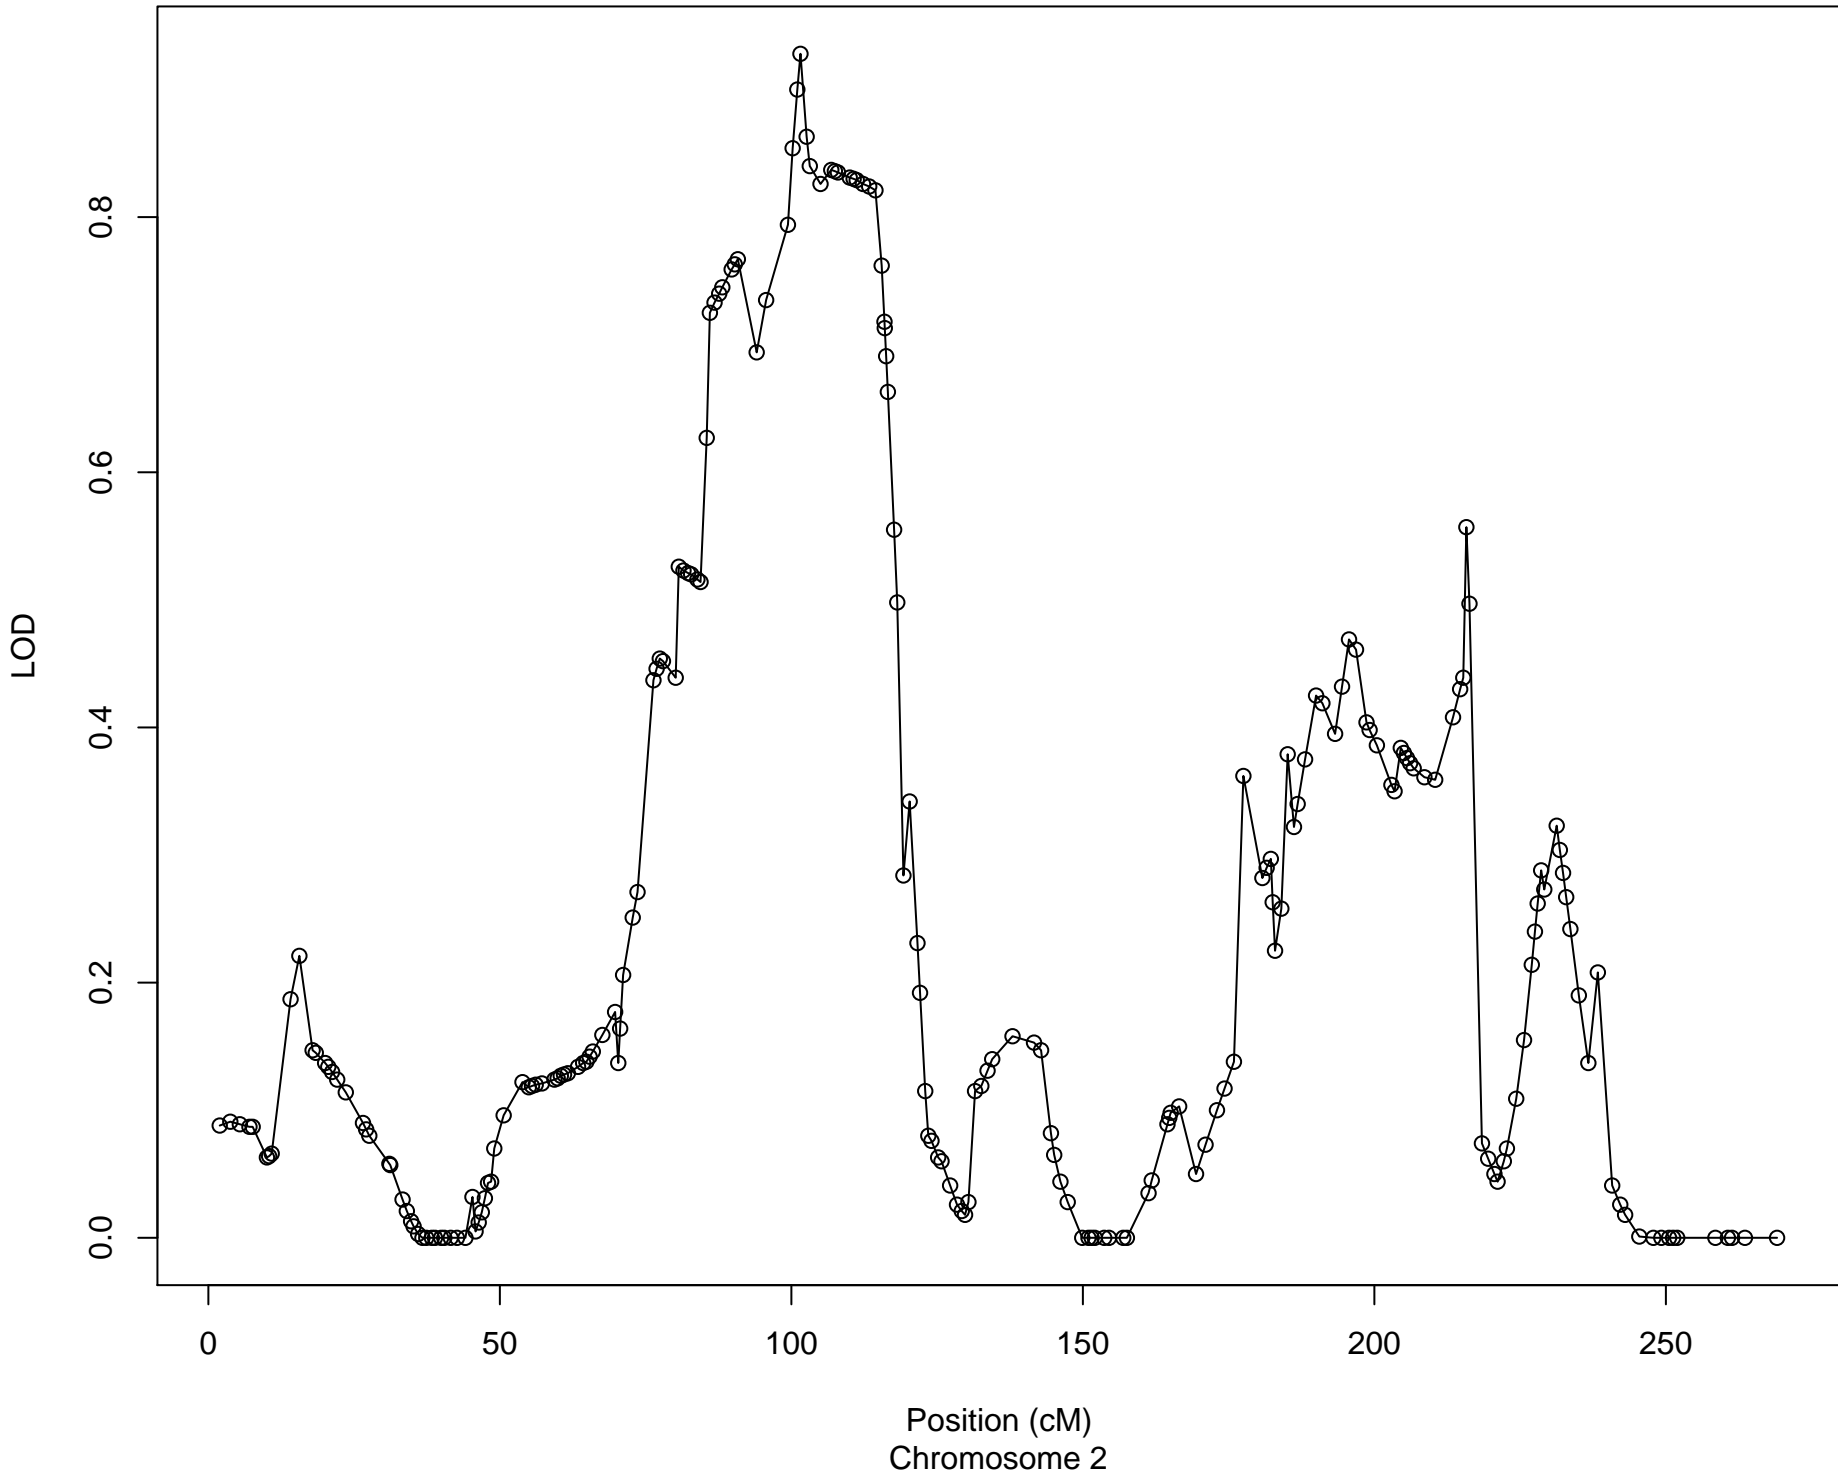

# IC50 (Camptothecin) (IC50\_CPT)

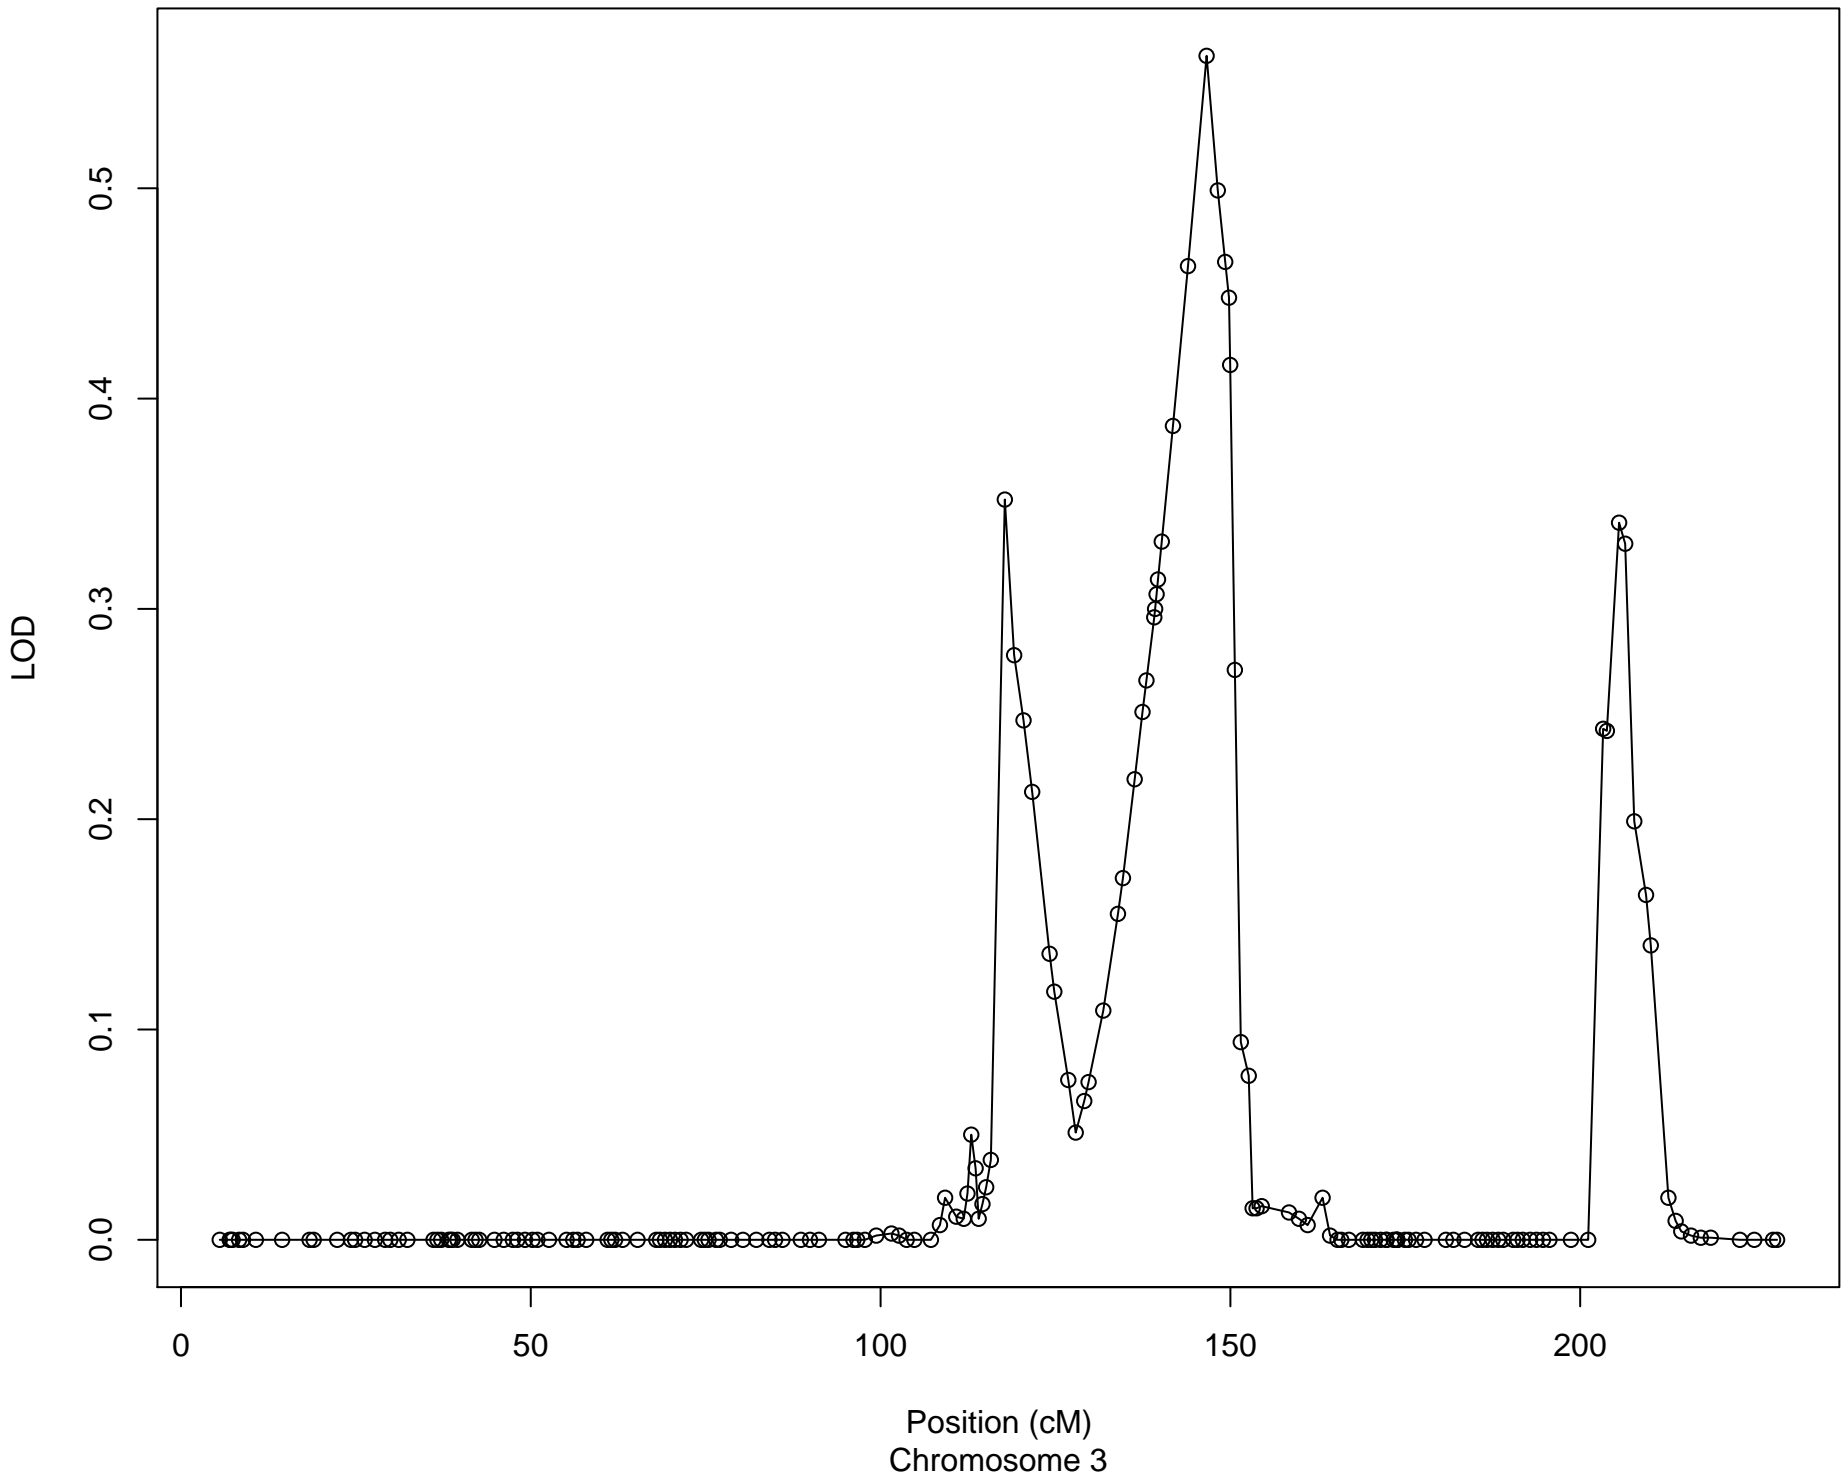

# IC50 (Camptothecin) (IC50\_CPT)

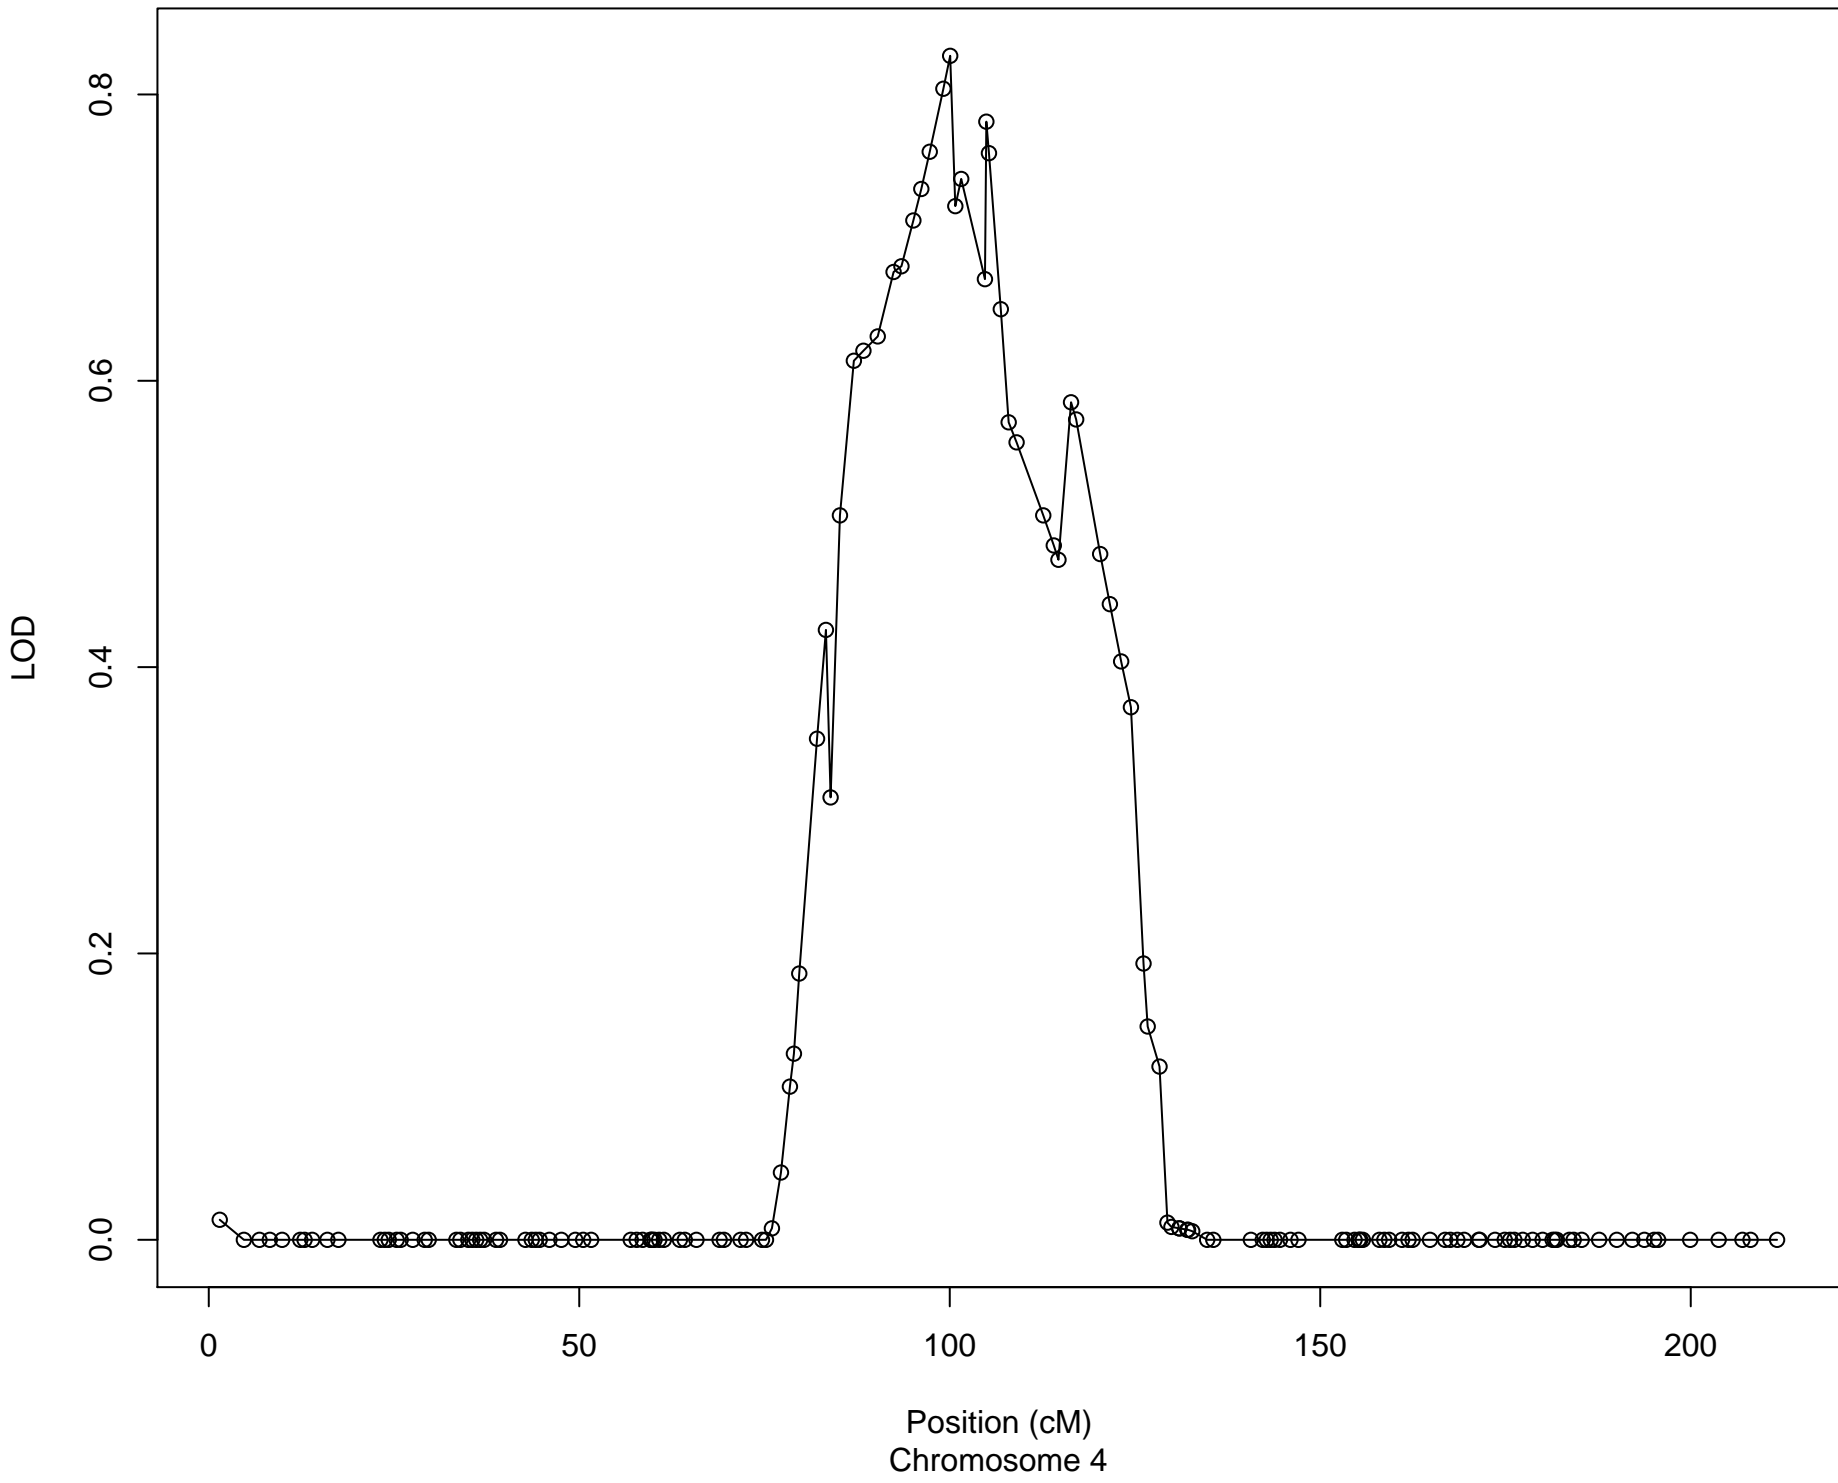

# IC50 (Camptothecin) (IC50\_CPT)

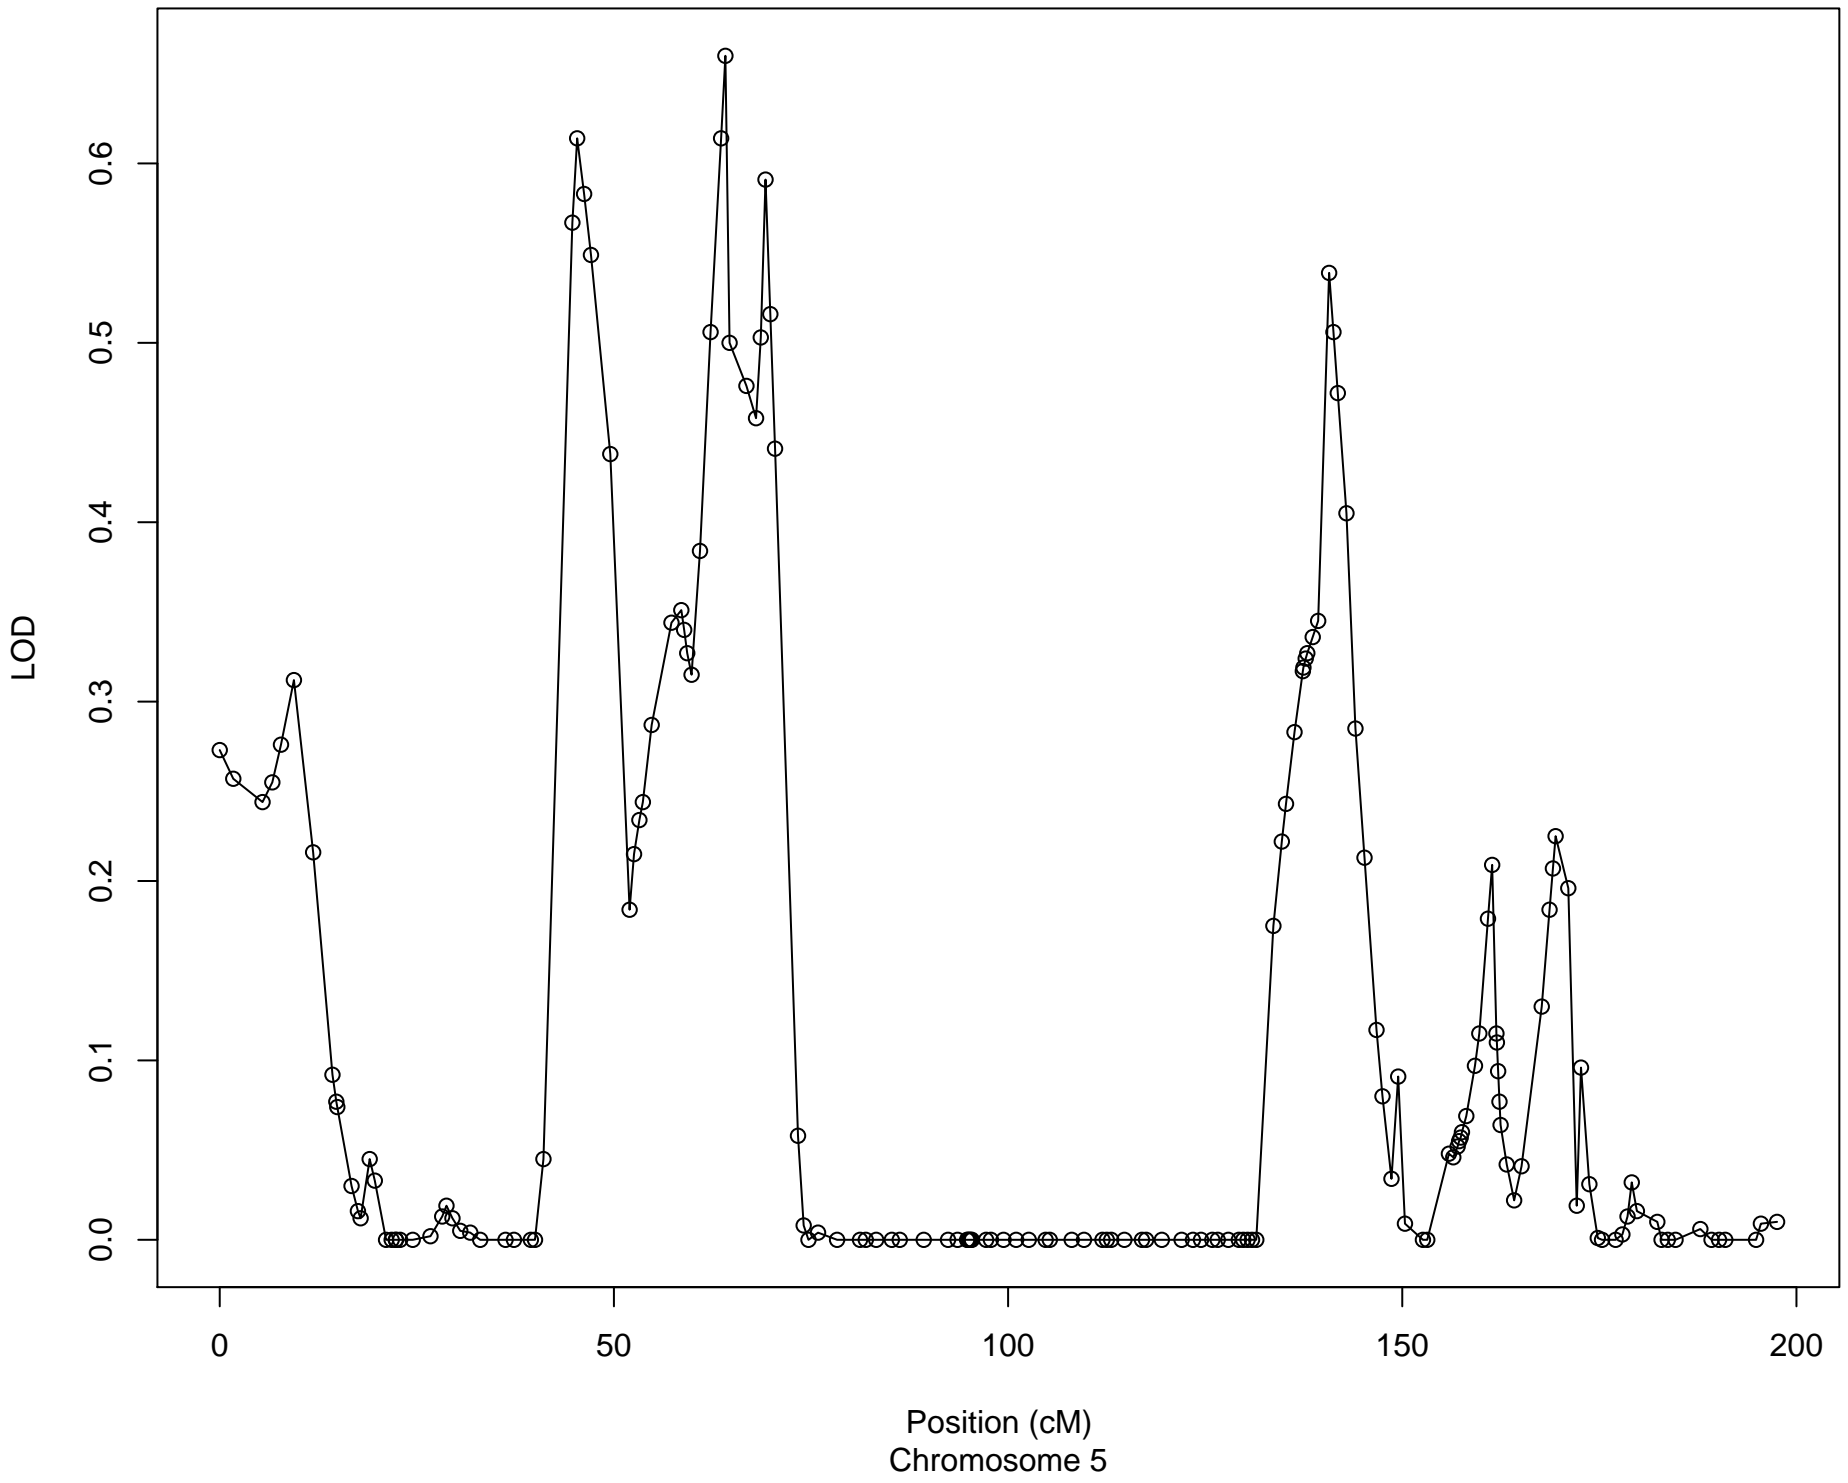

# IC50 (Camptothecin) (IC50\_CPT)

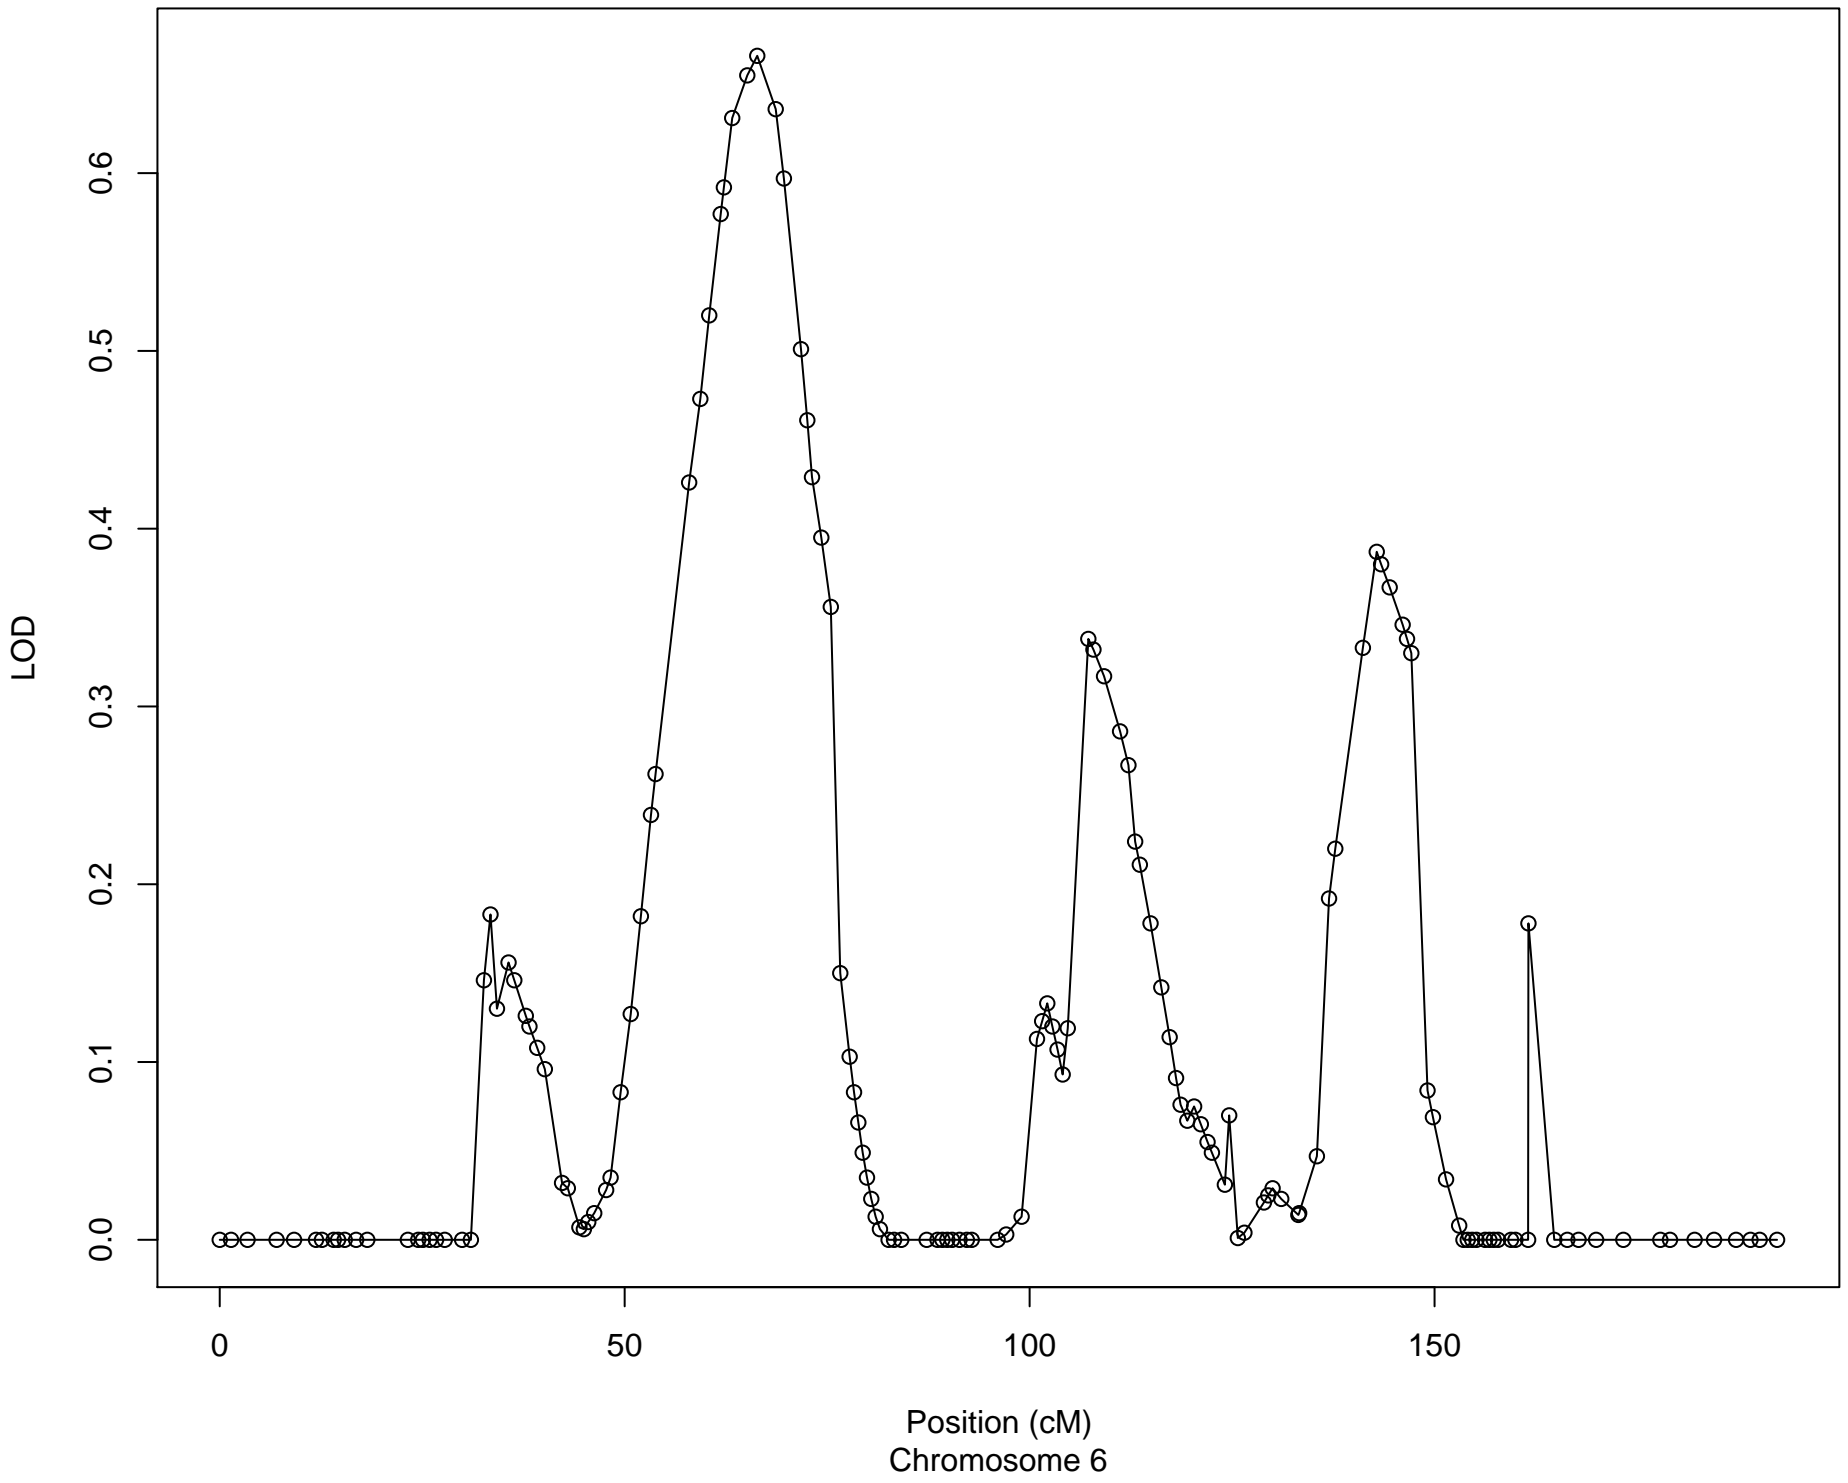



# IC50 (Camptothecin) (IC50\_CPT)

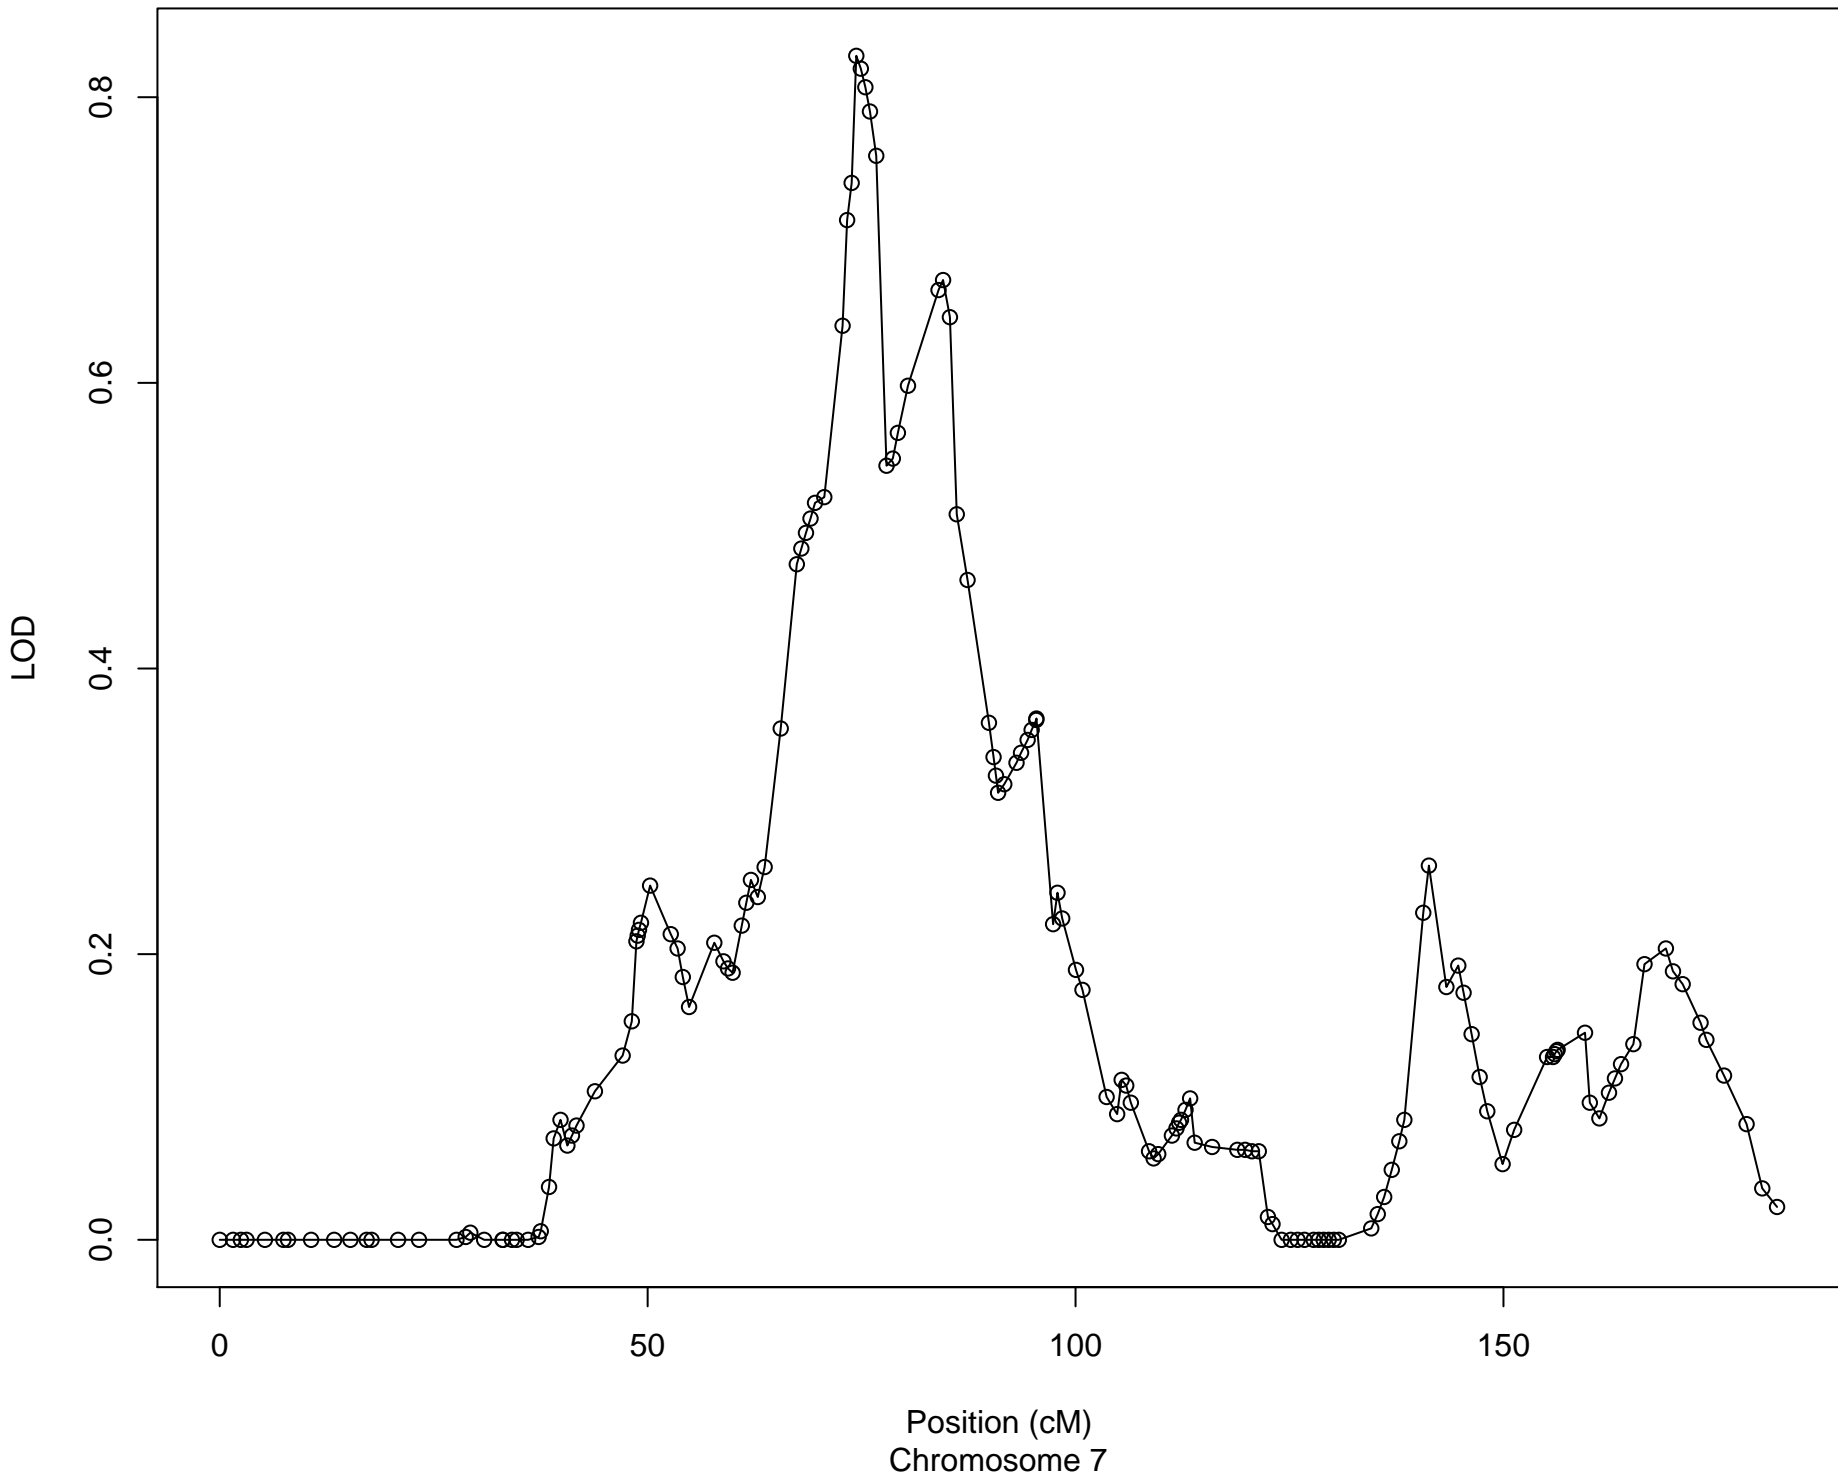

# IC50 (Camptothecin) (IC50\_CPT)

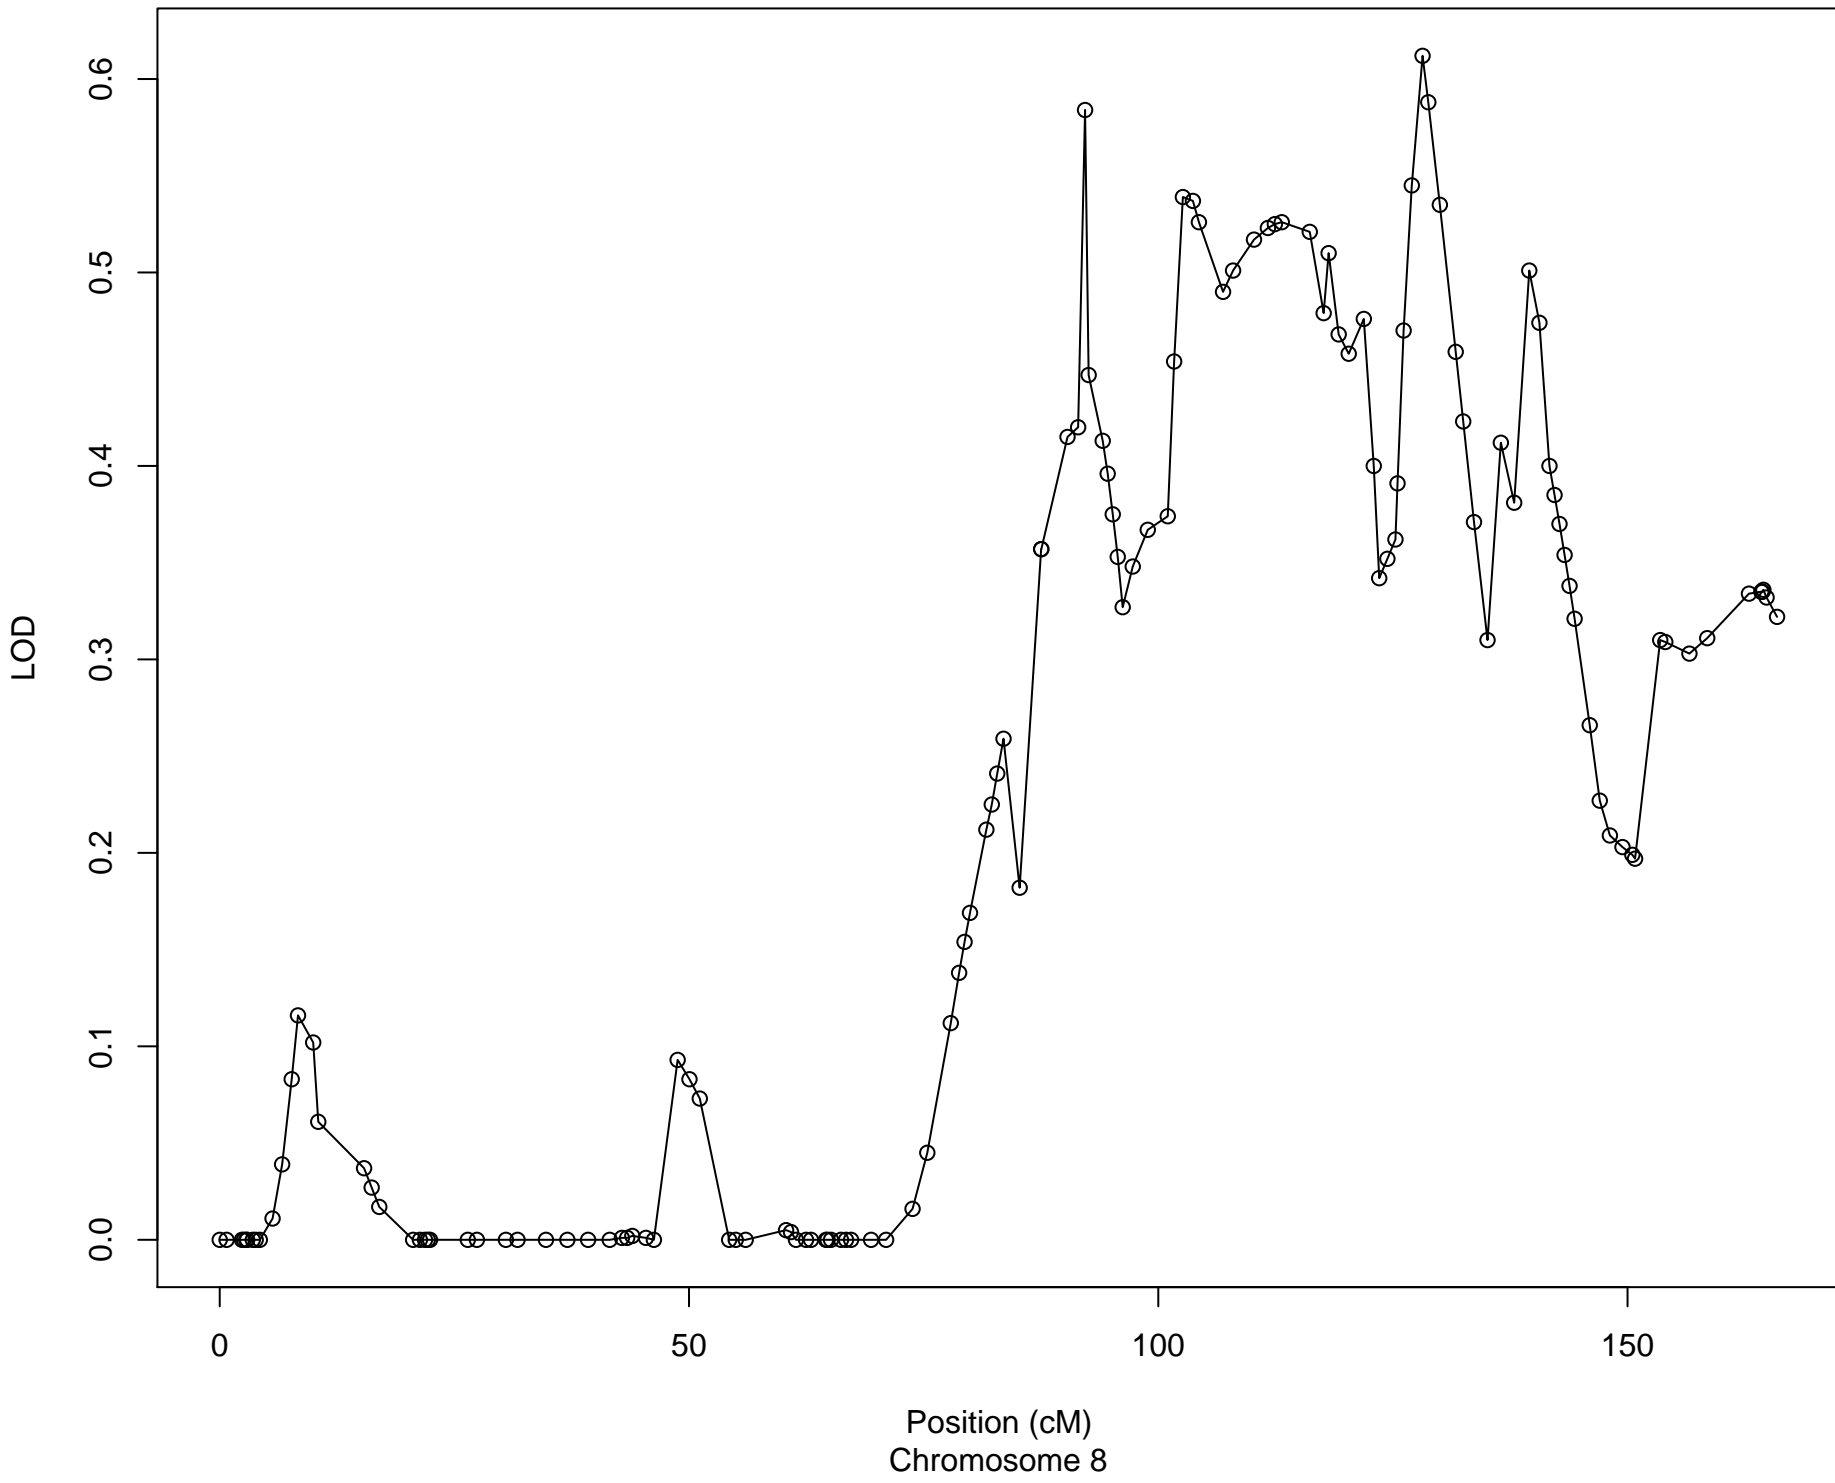

# IC50 (Camptothecin) (IC50\_CPT)

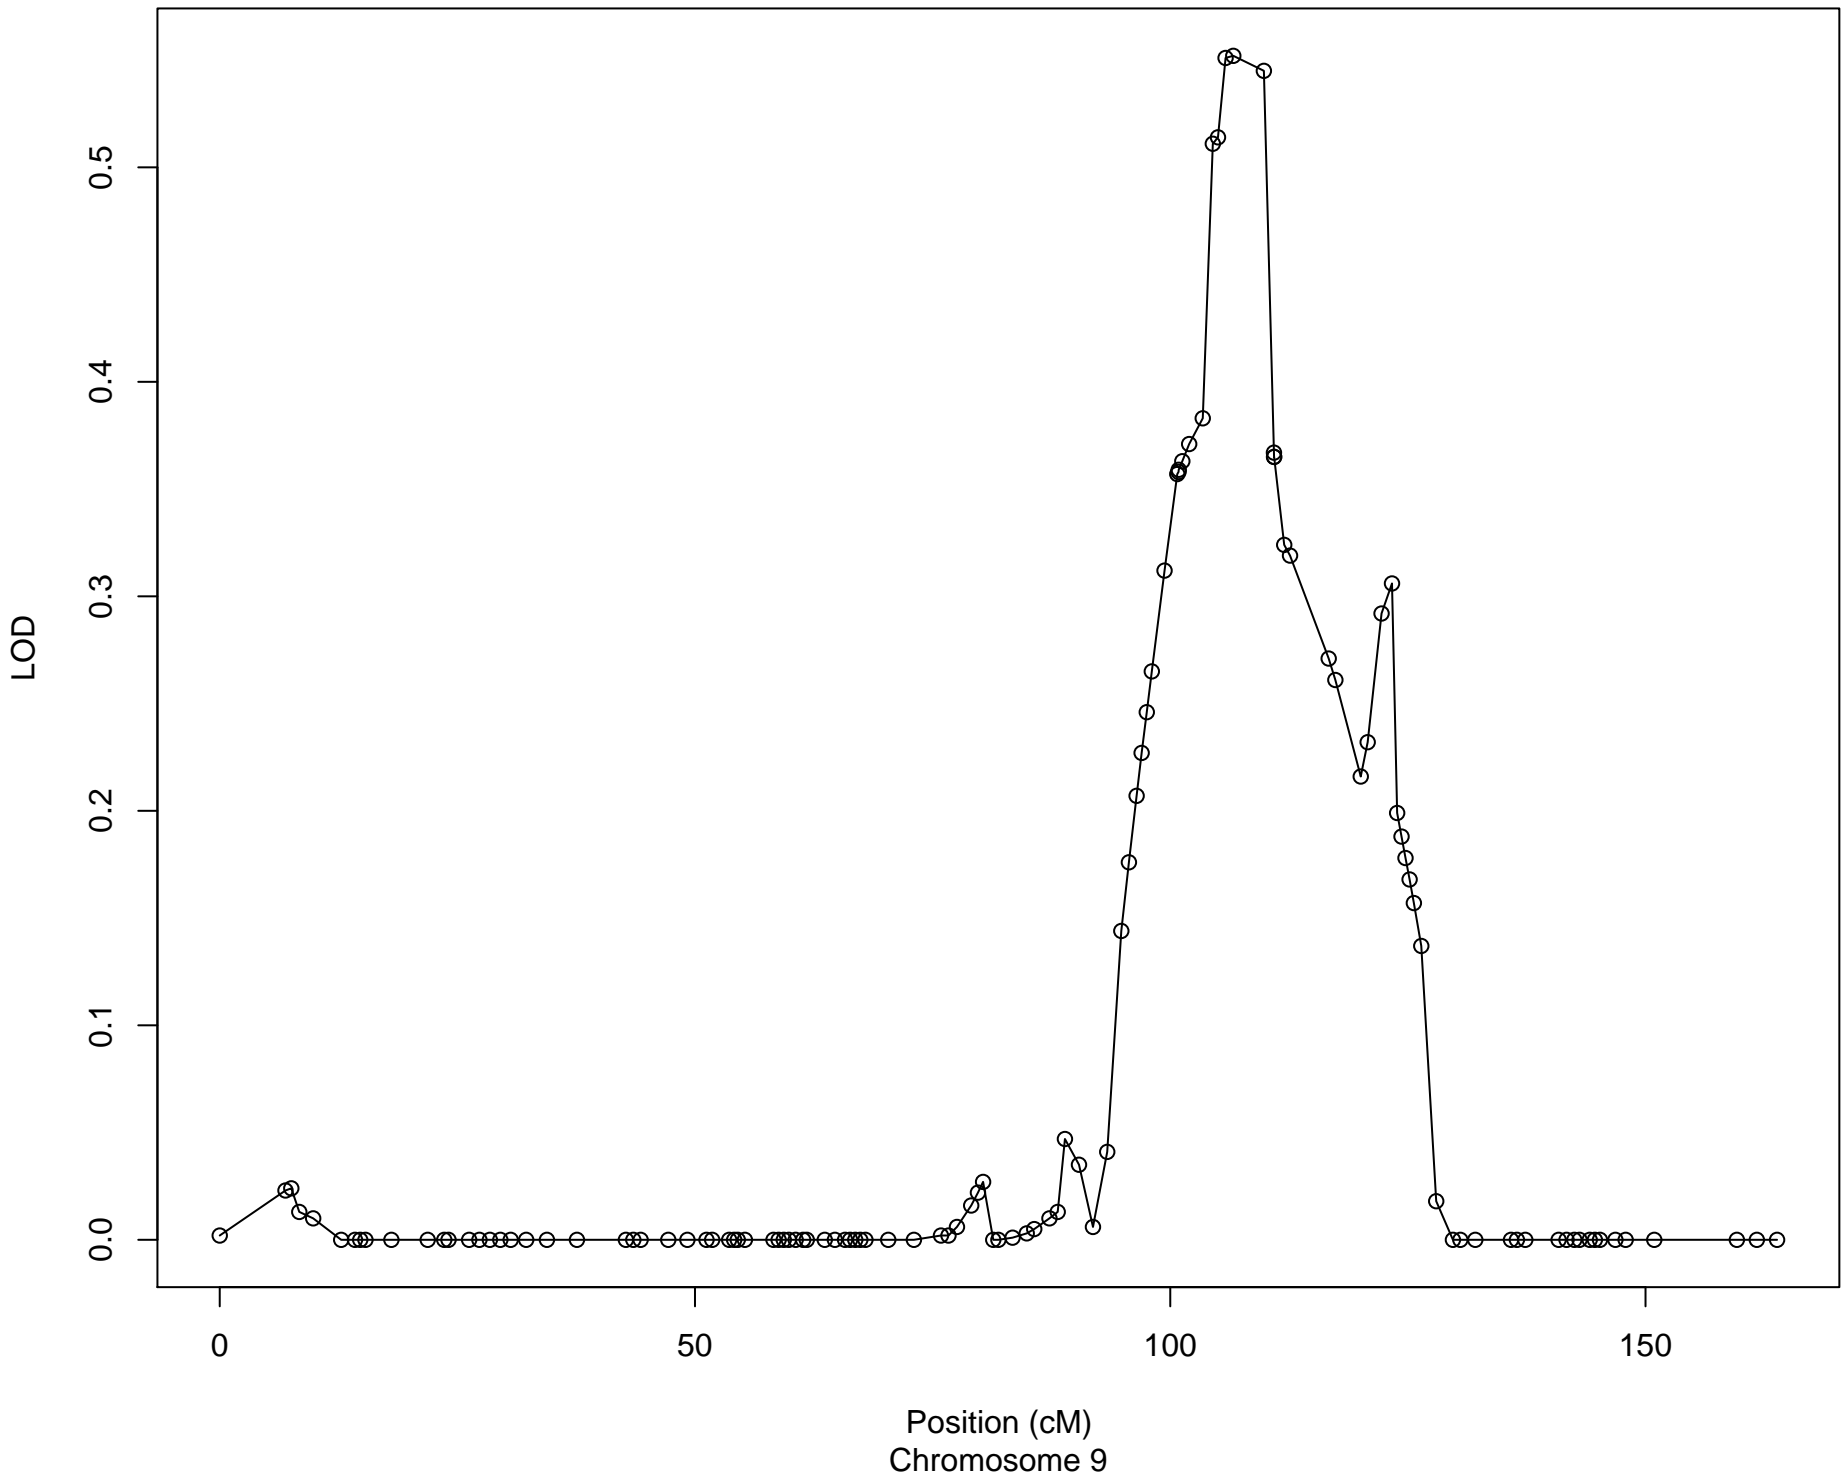

# IC50 (Camptothecin) (IC50\_CPT)

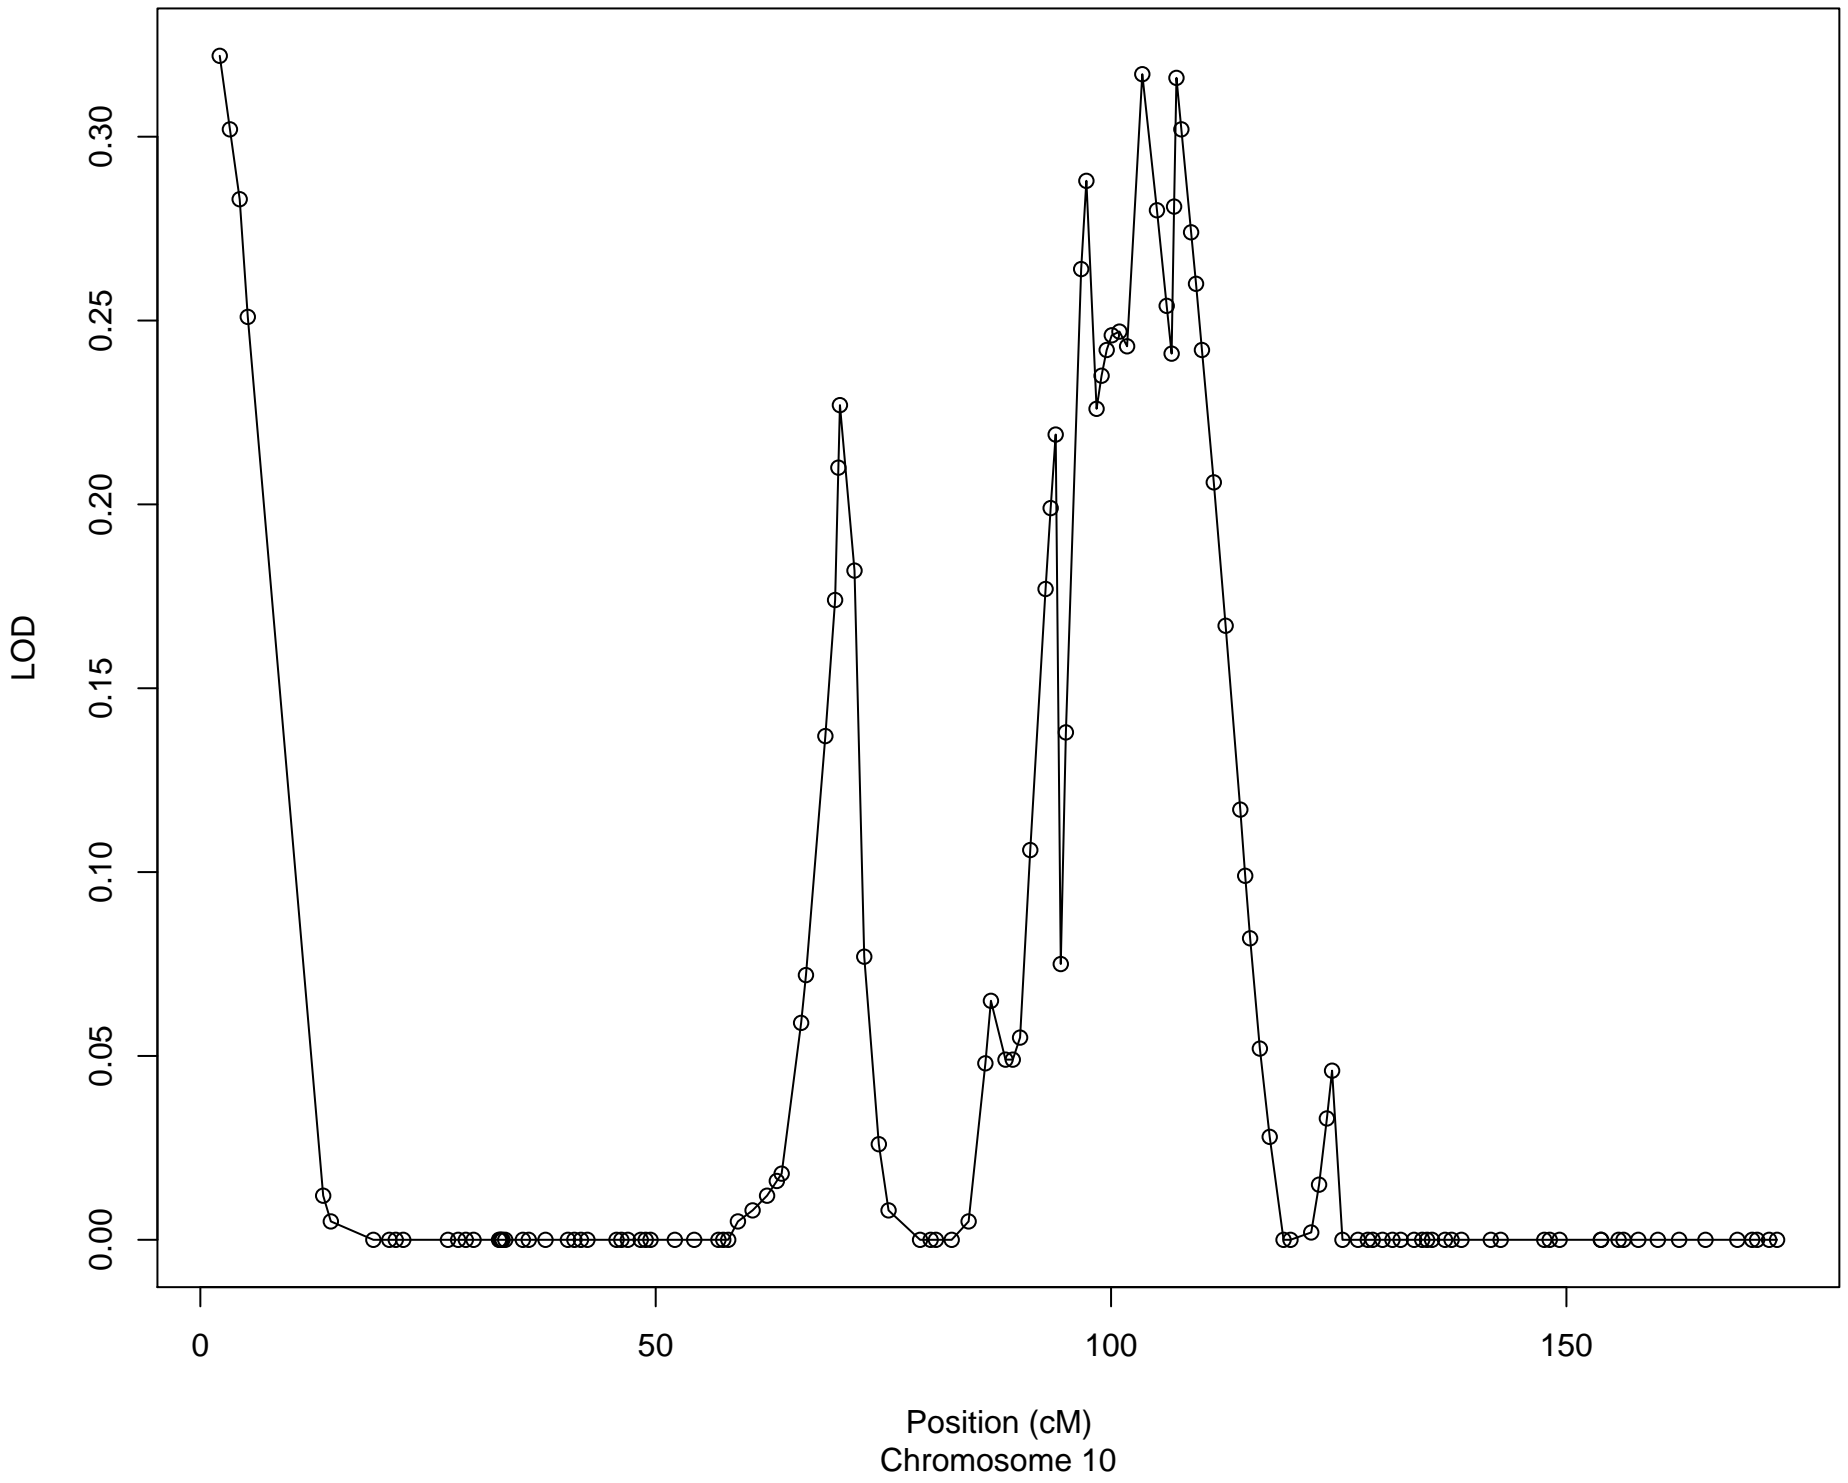

# IC50 (Camptothecin) (IC50\_CPT)

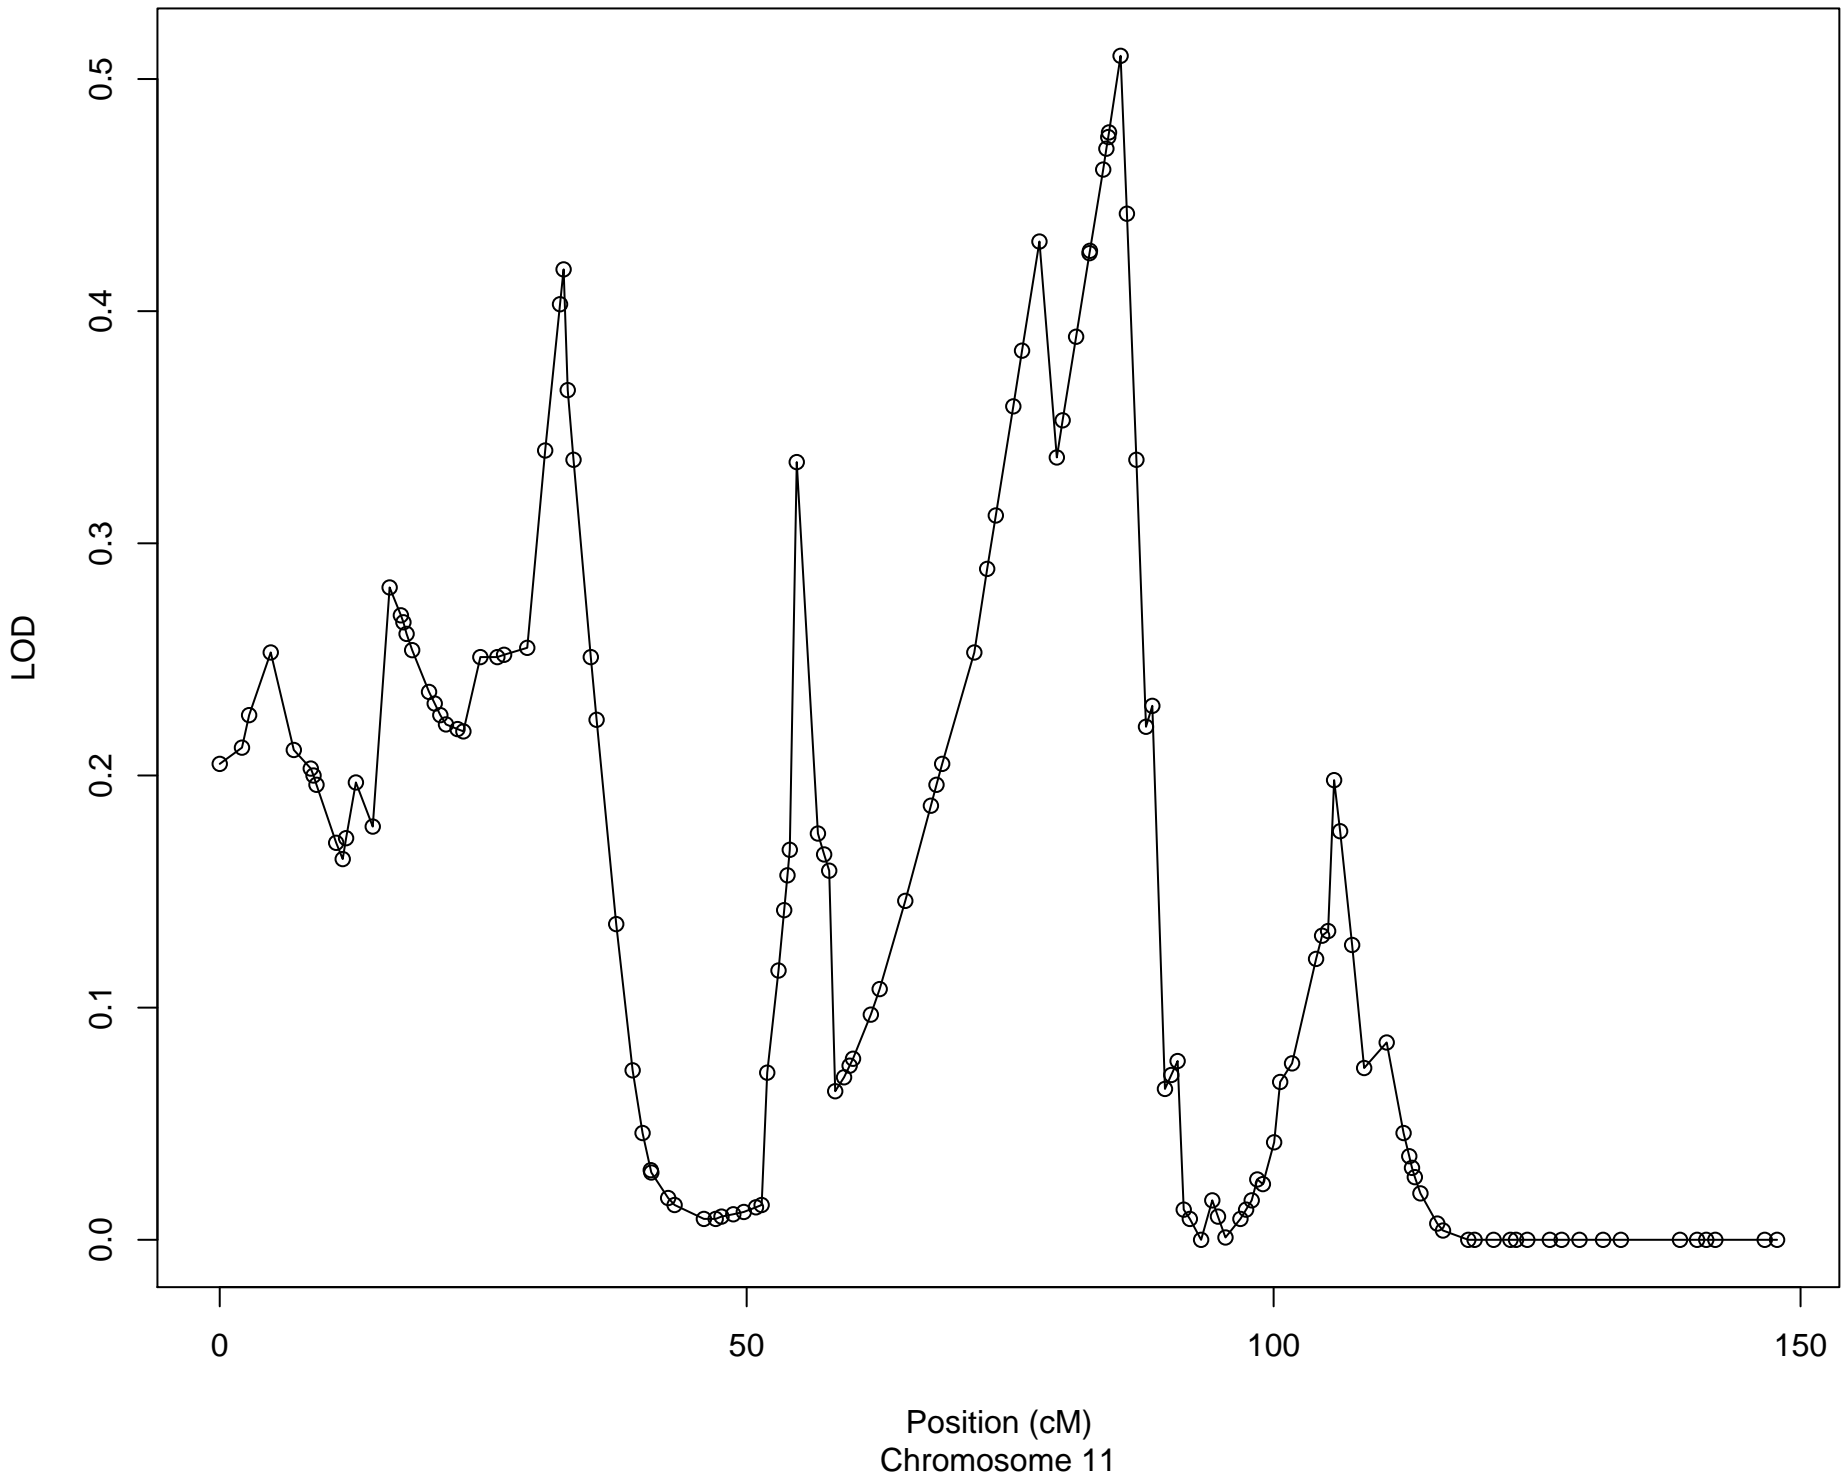

# IC50 (Camptothecin) (IC50\_CPT)

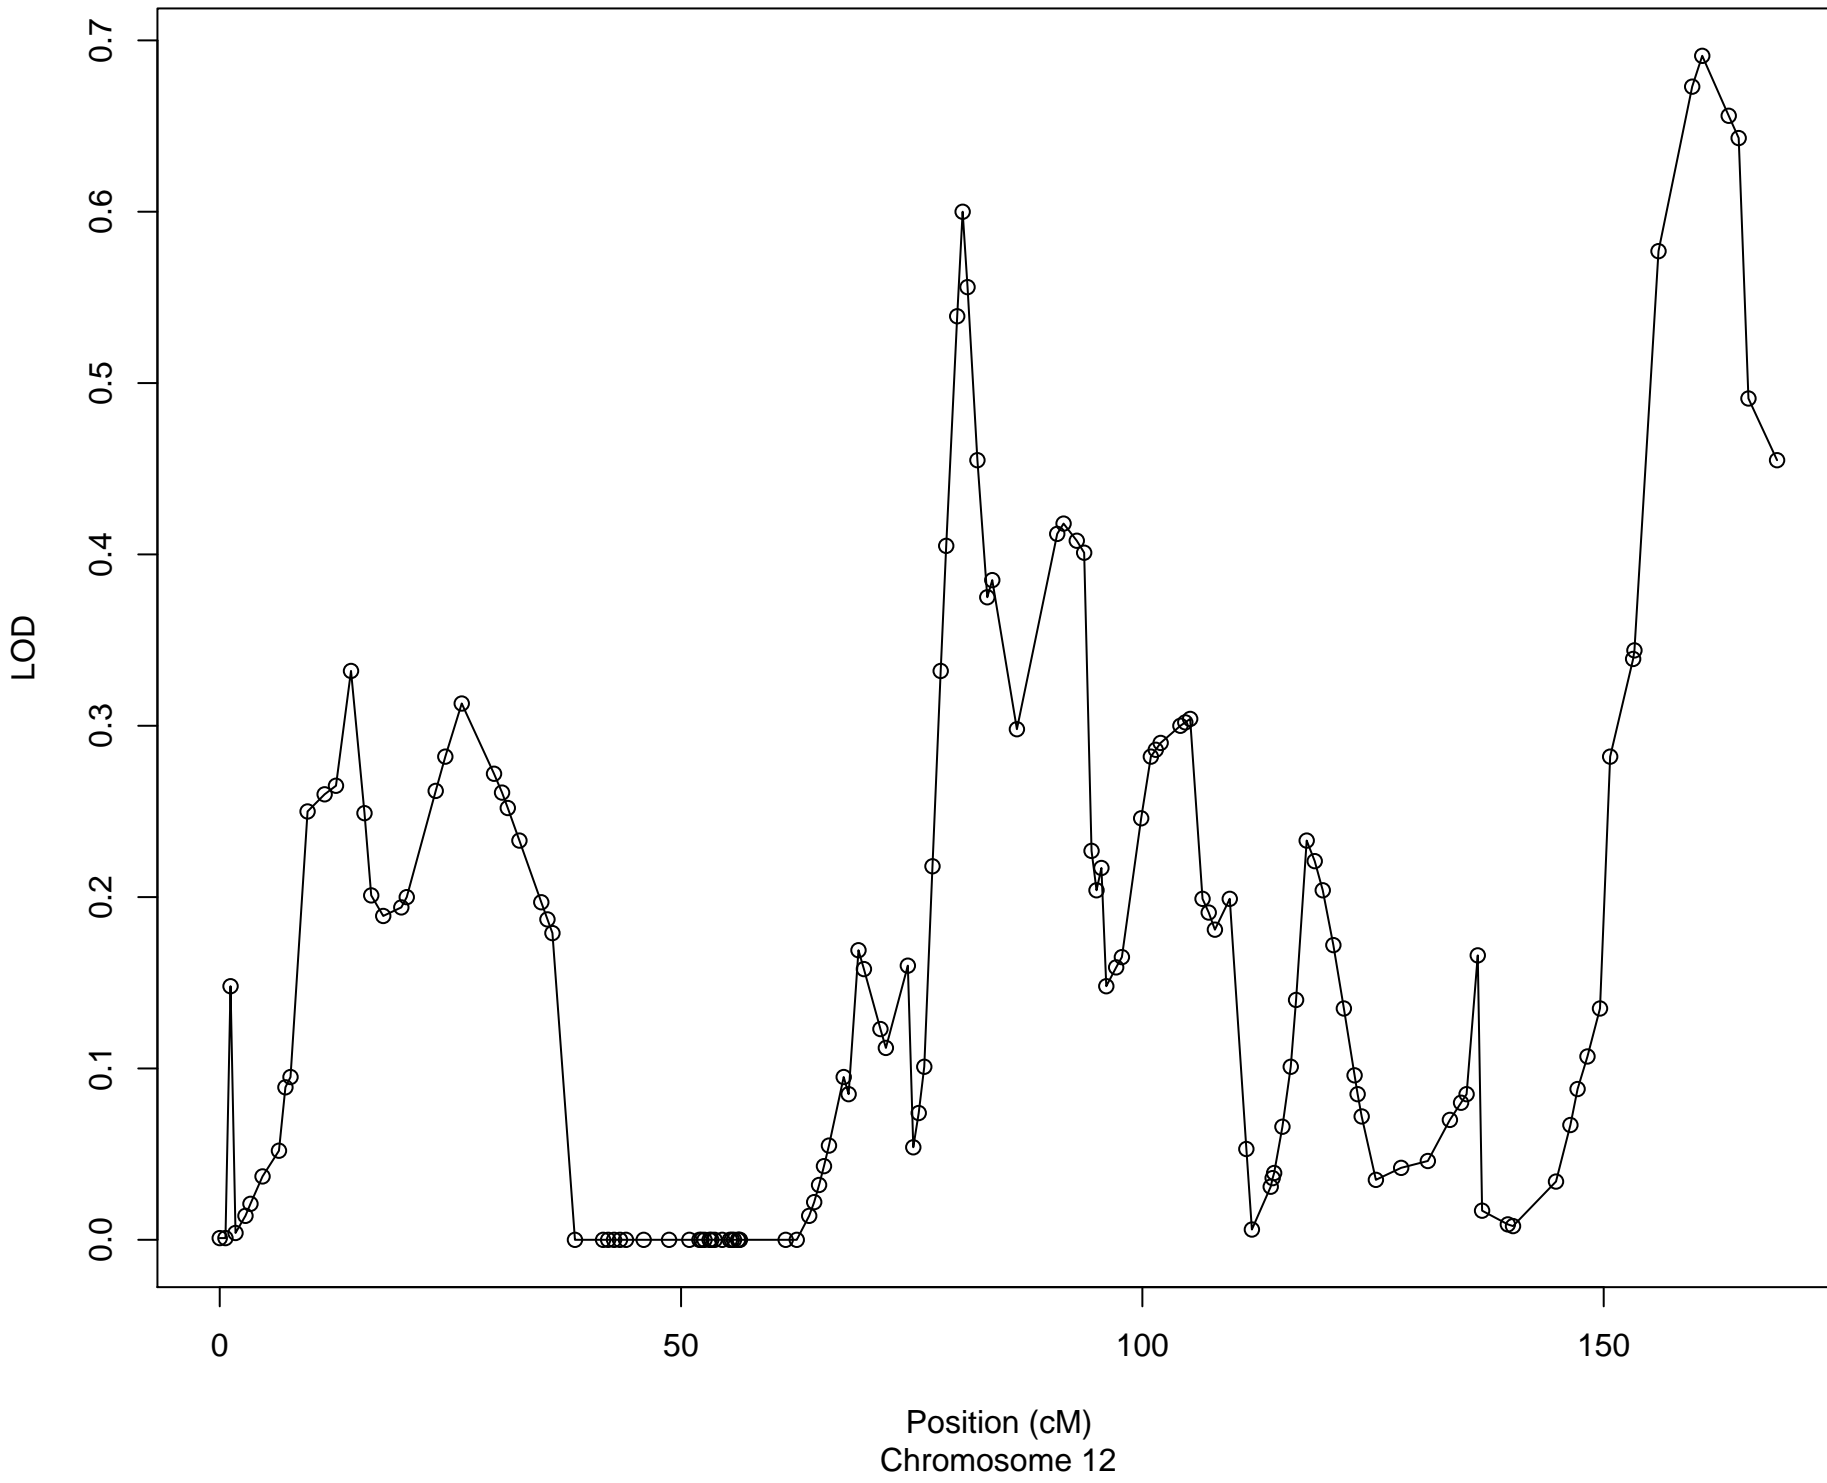

# IC50 (Camptothecin) (IC50\_CPT)

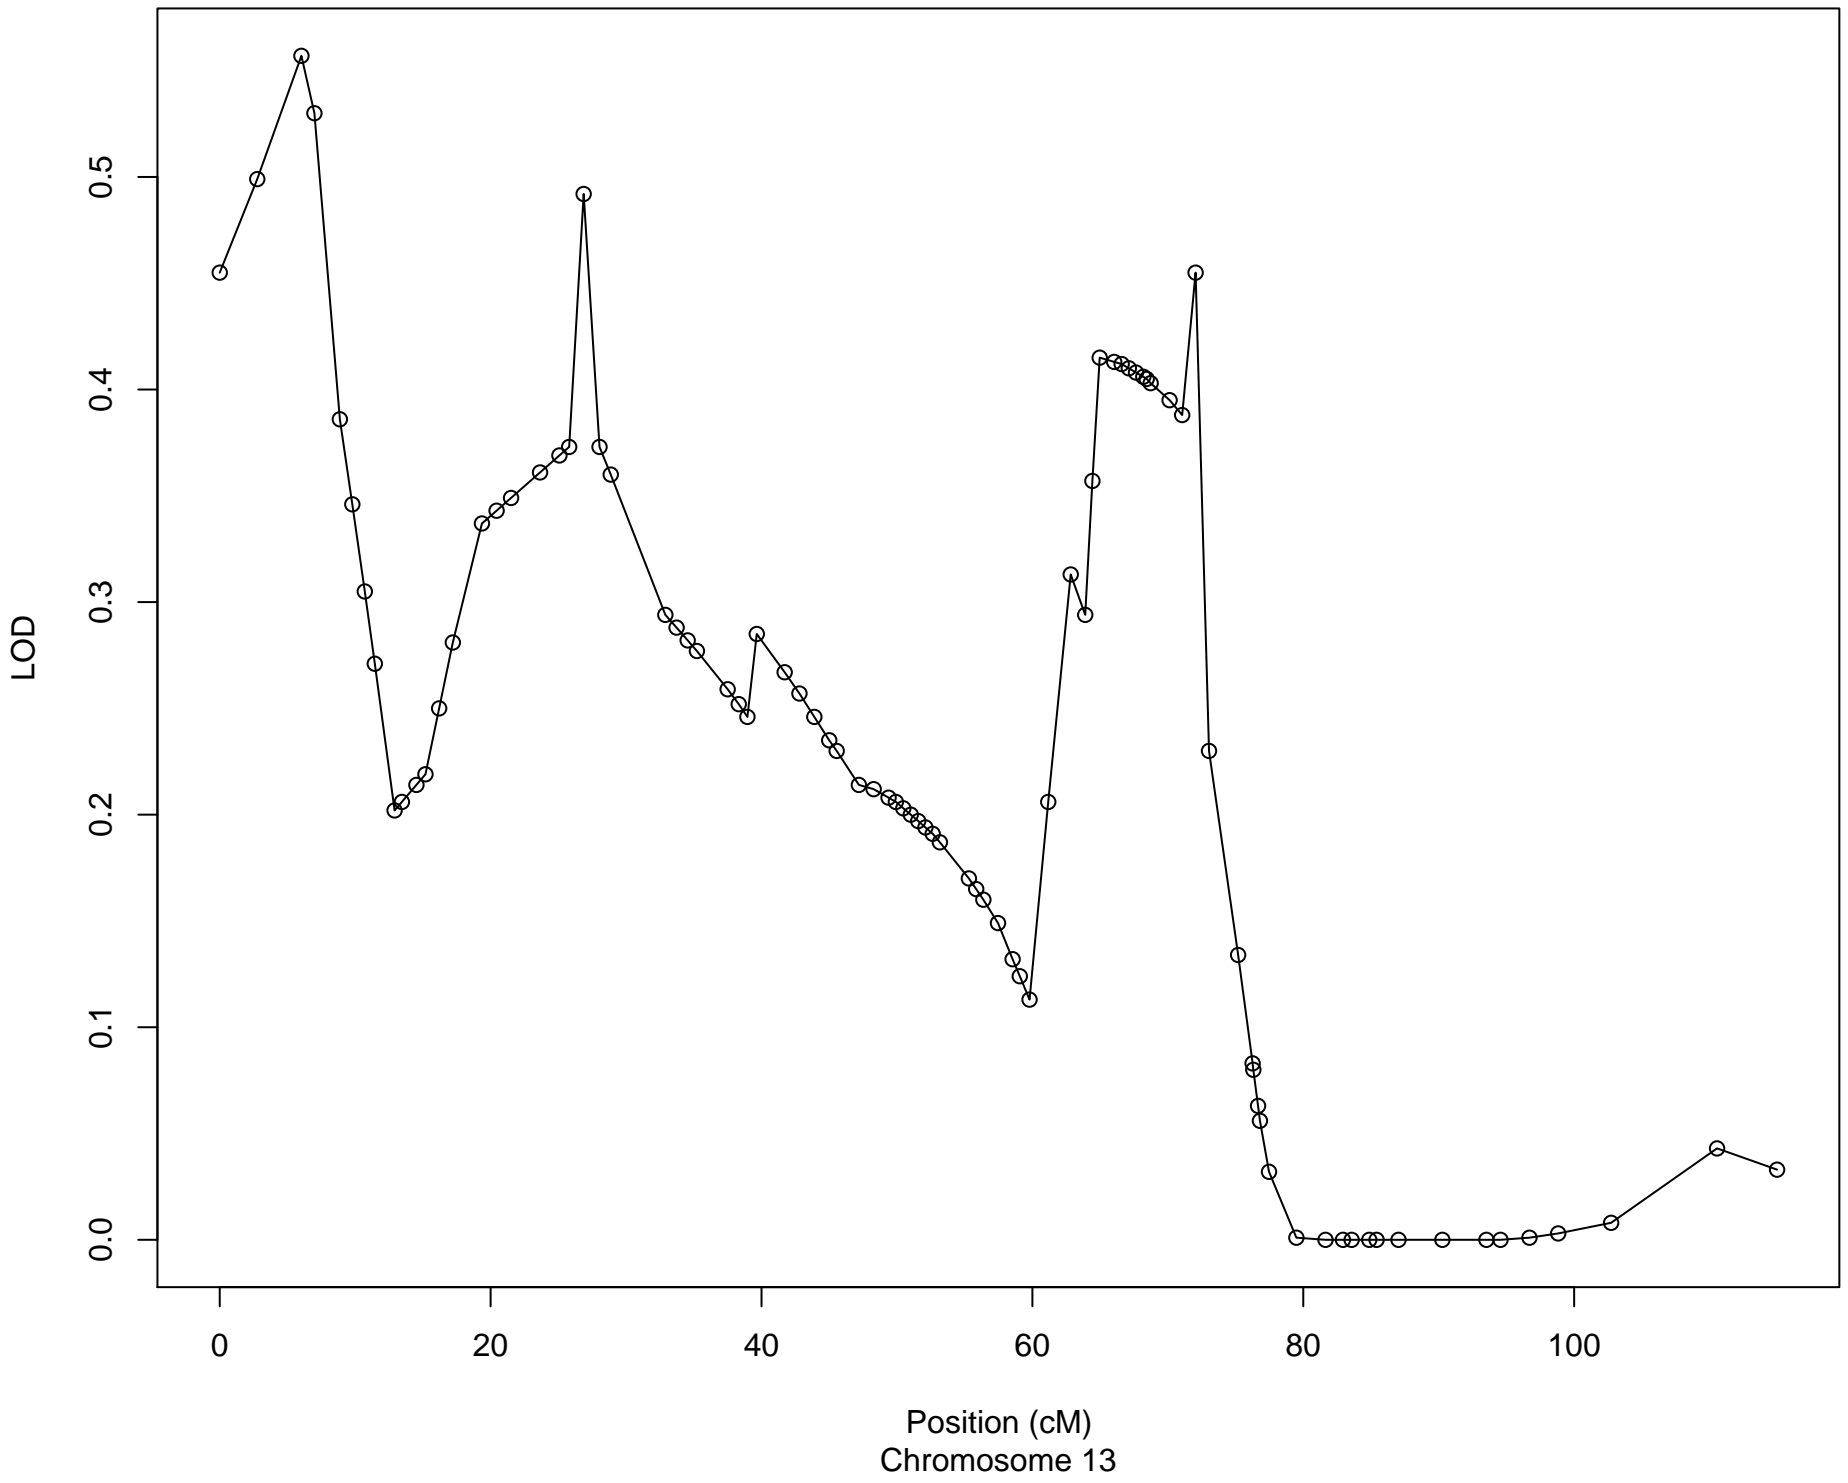

# IC50 (Camptothecin) (IC50\_CPT)

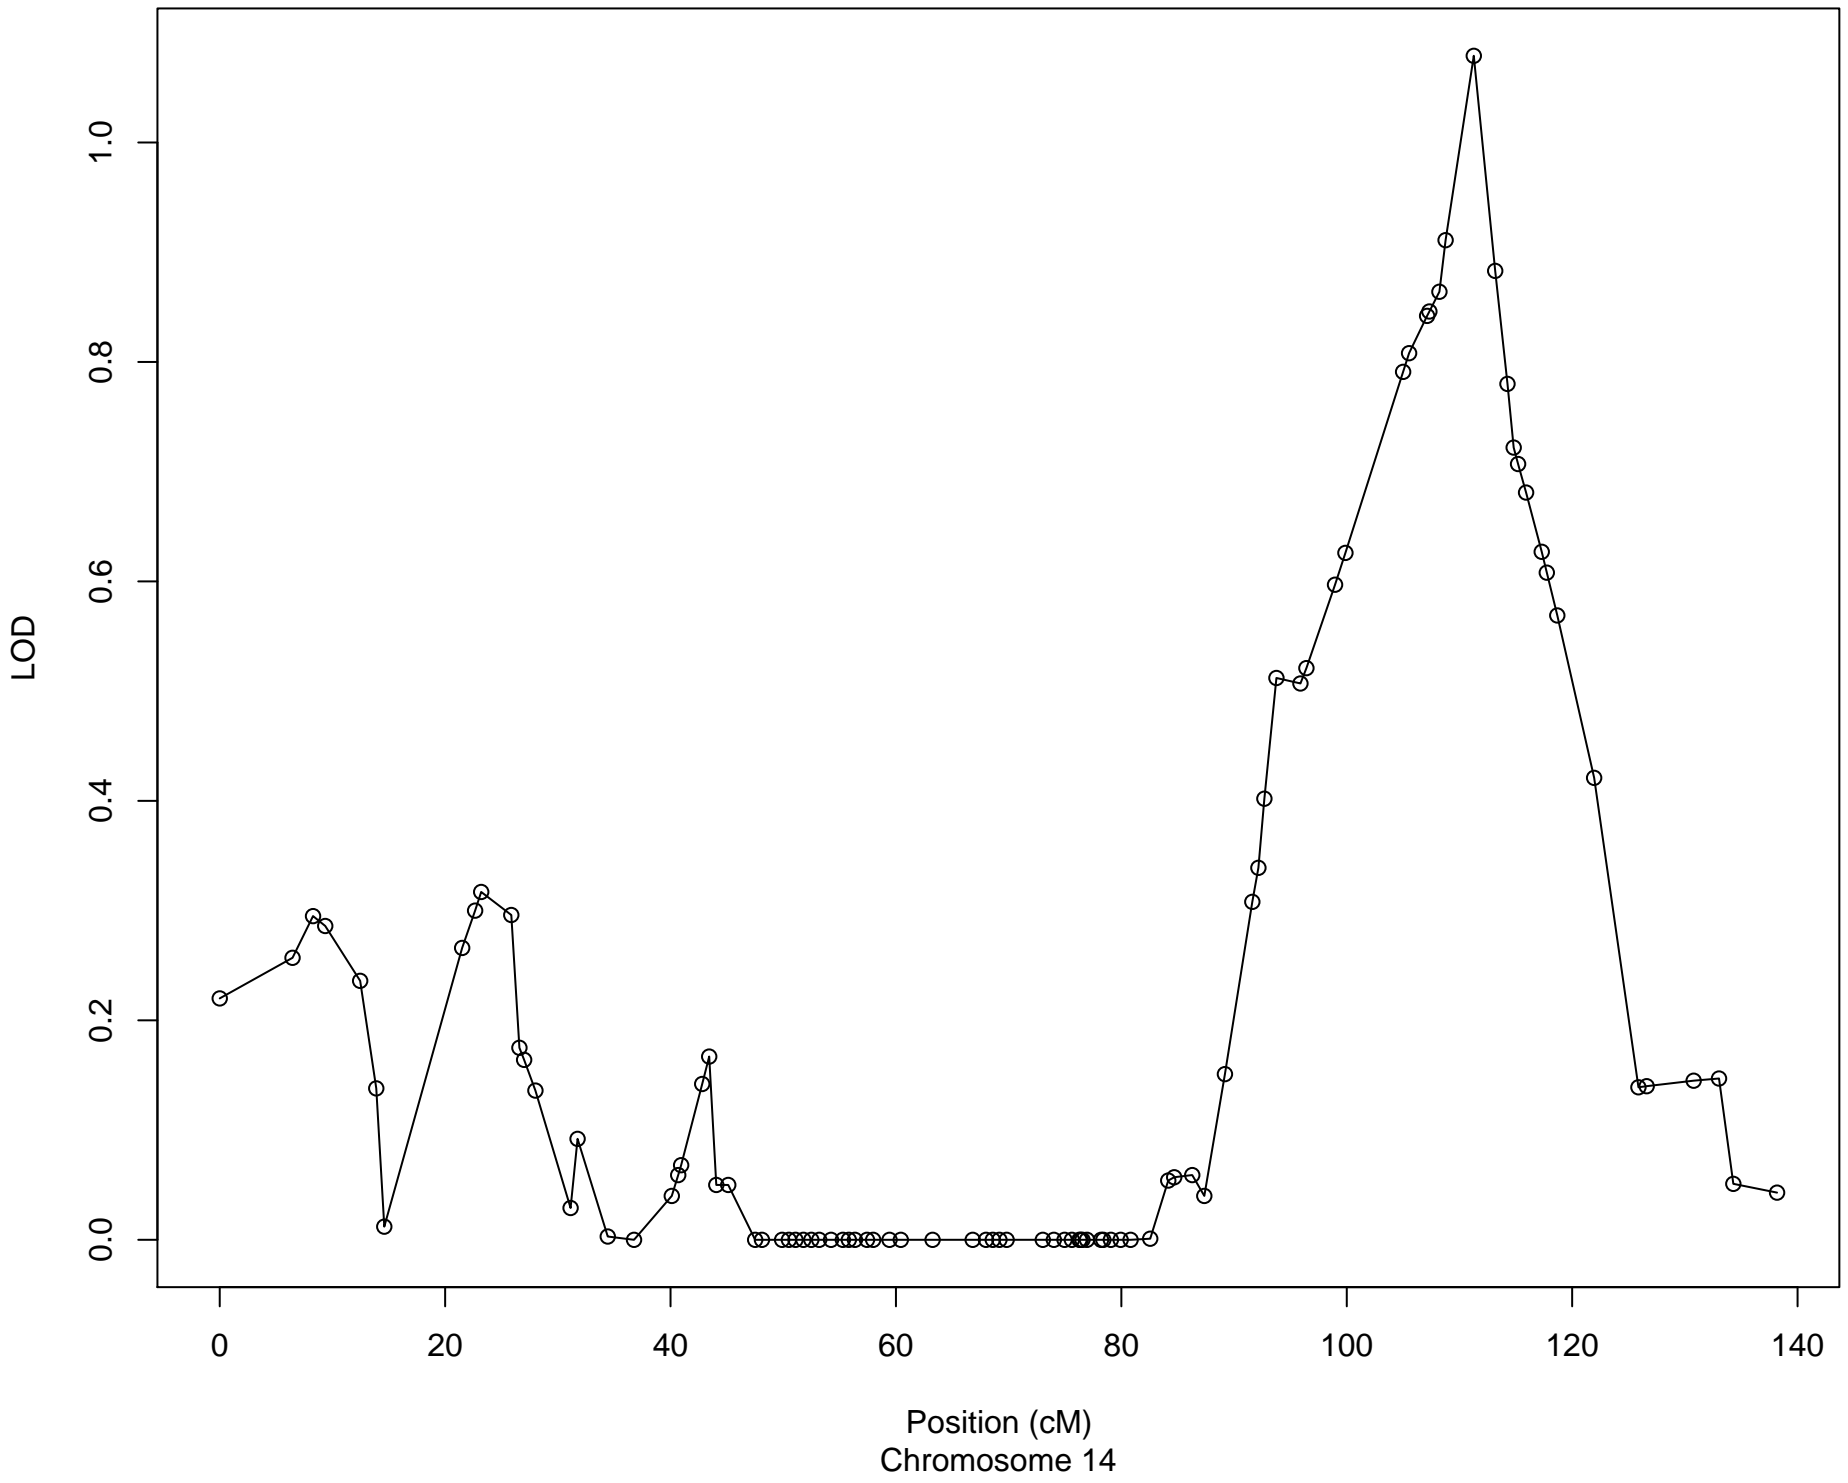



# IC50 (Camptothecin) (IC50\_CPT)

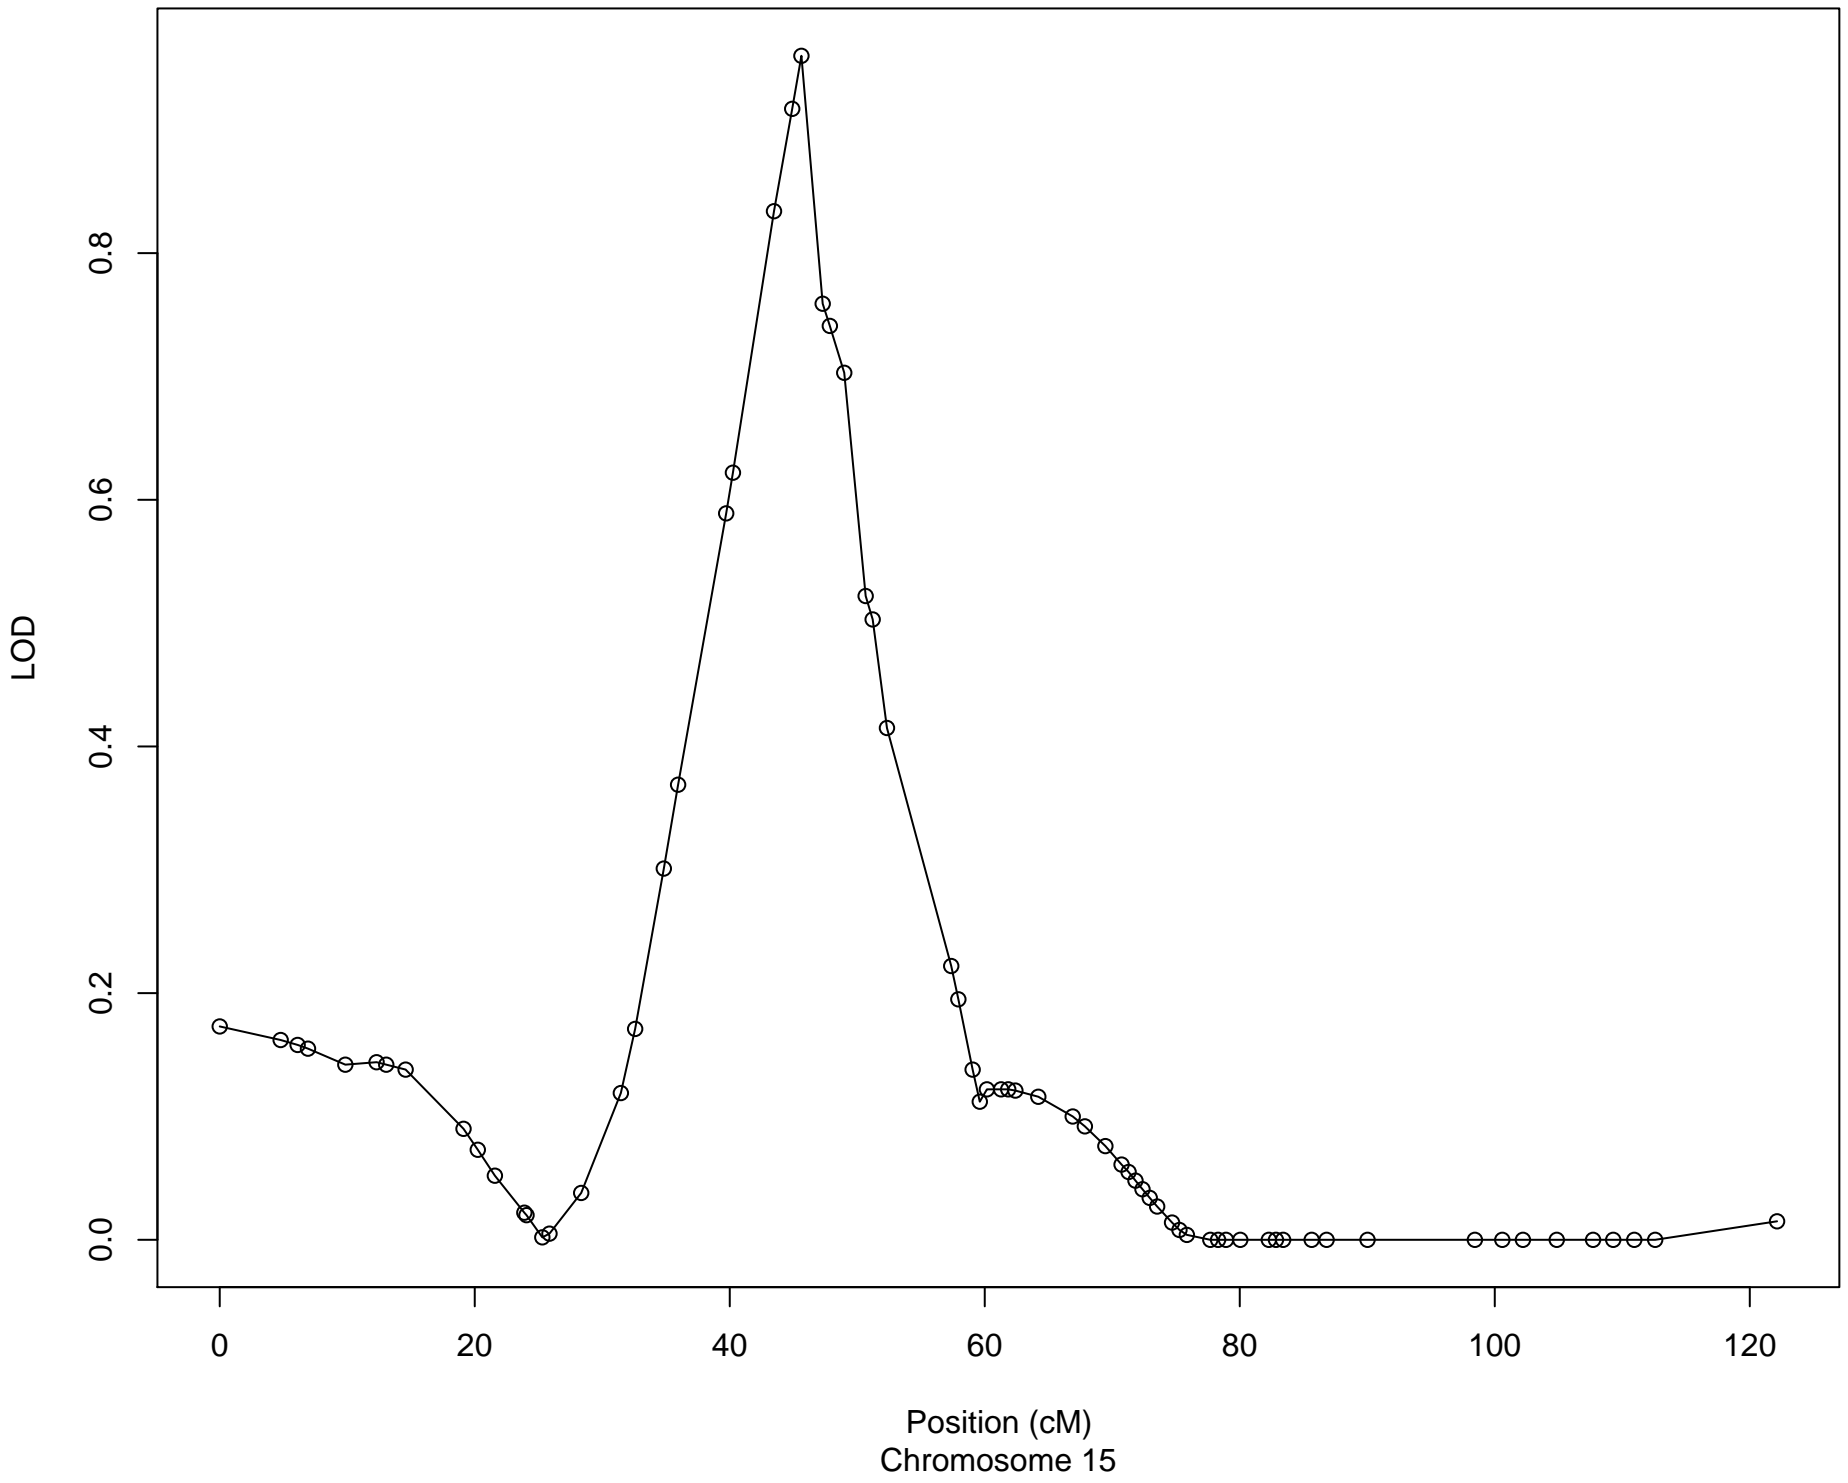

# IC50 (Camptothecin) (IC50\_CPT)

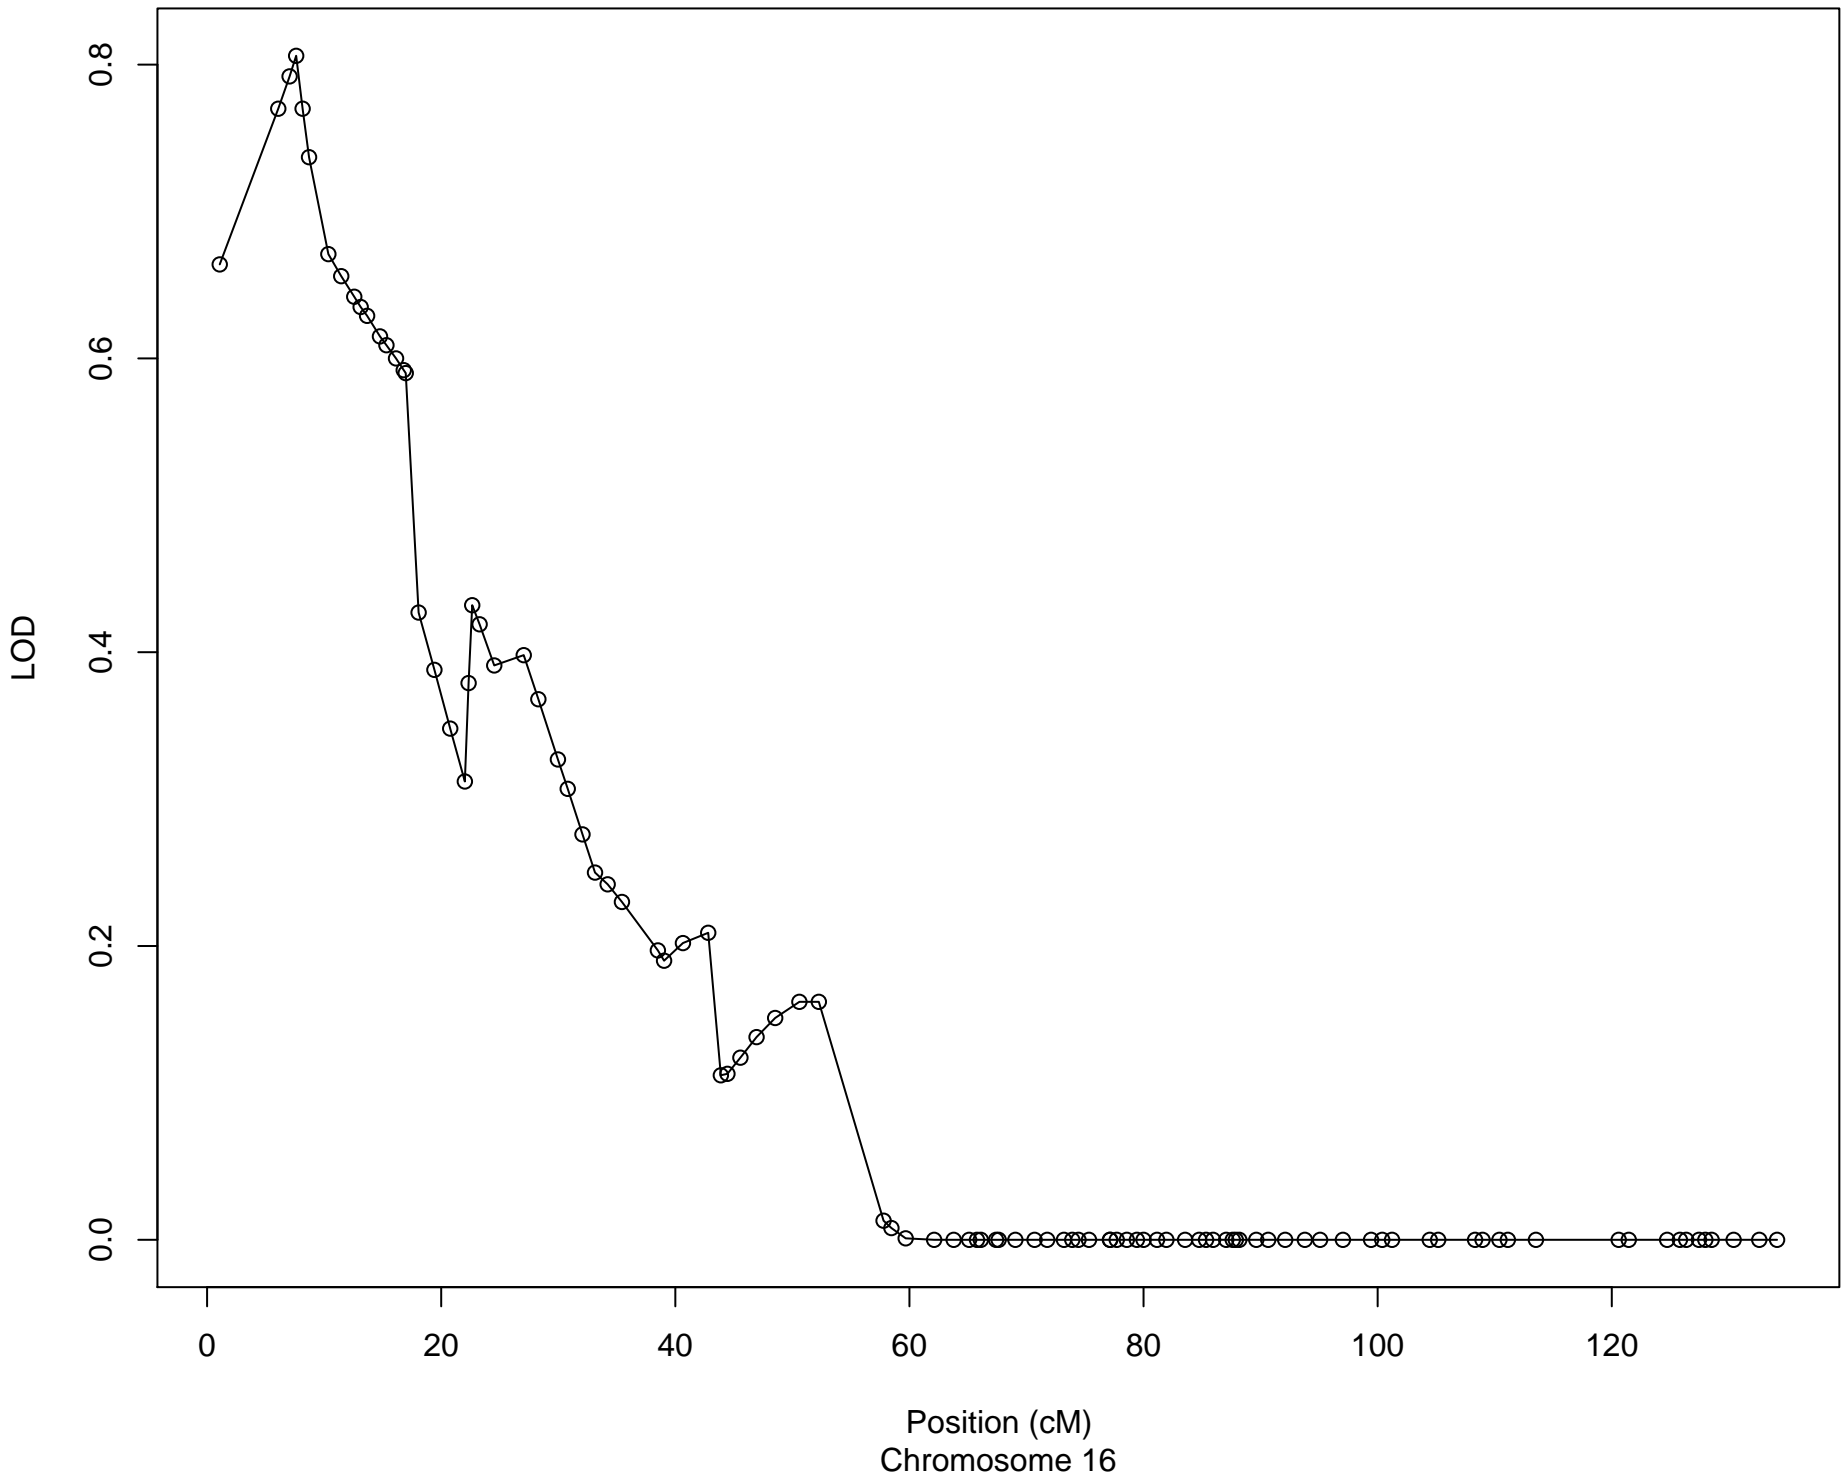

# IC50 (Camptothecin) (IC50\_CPT)

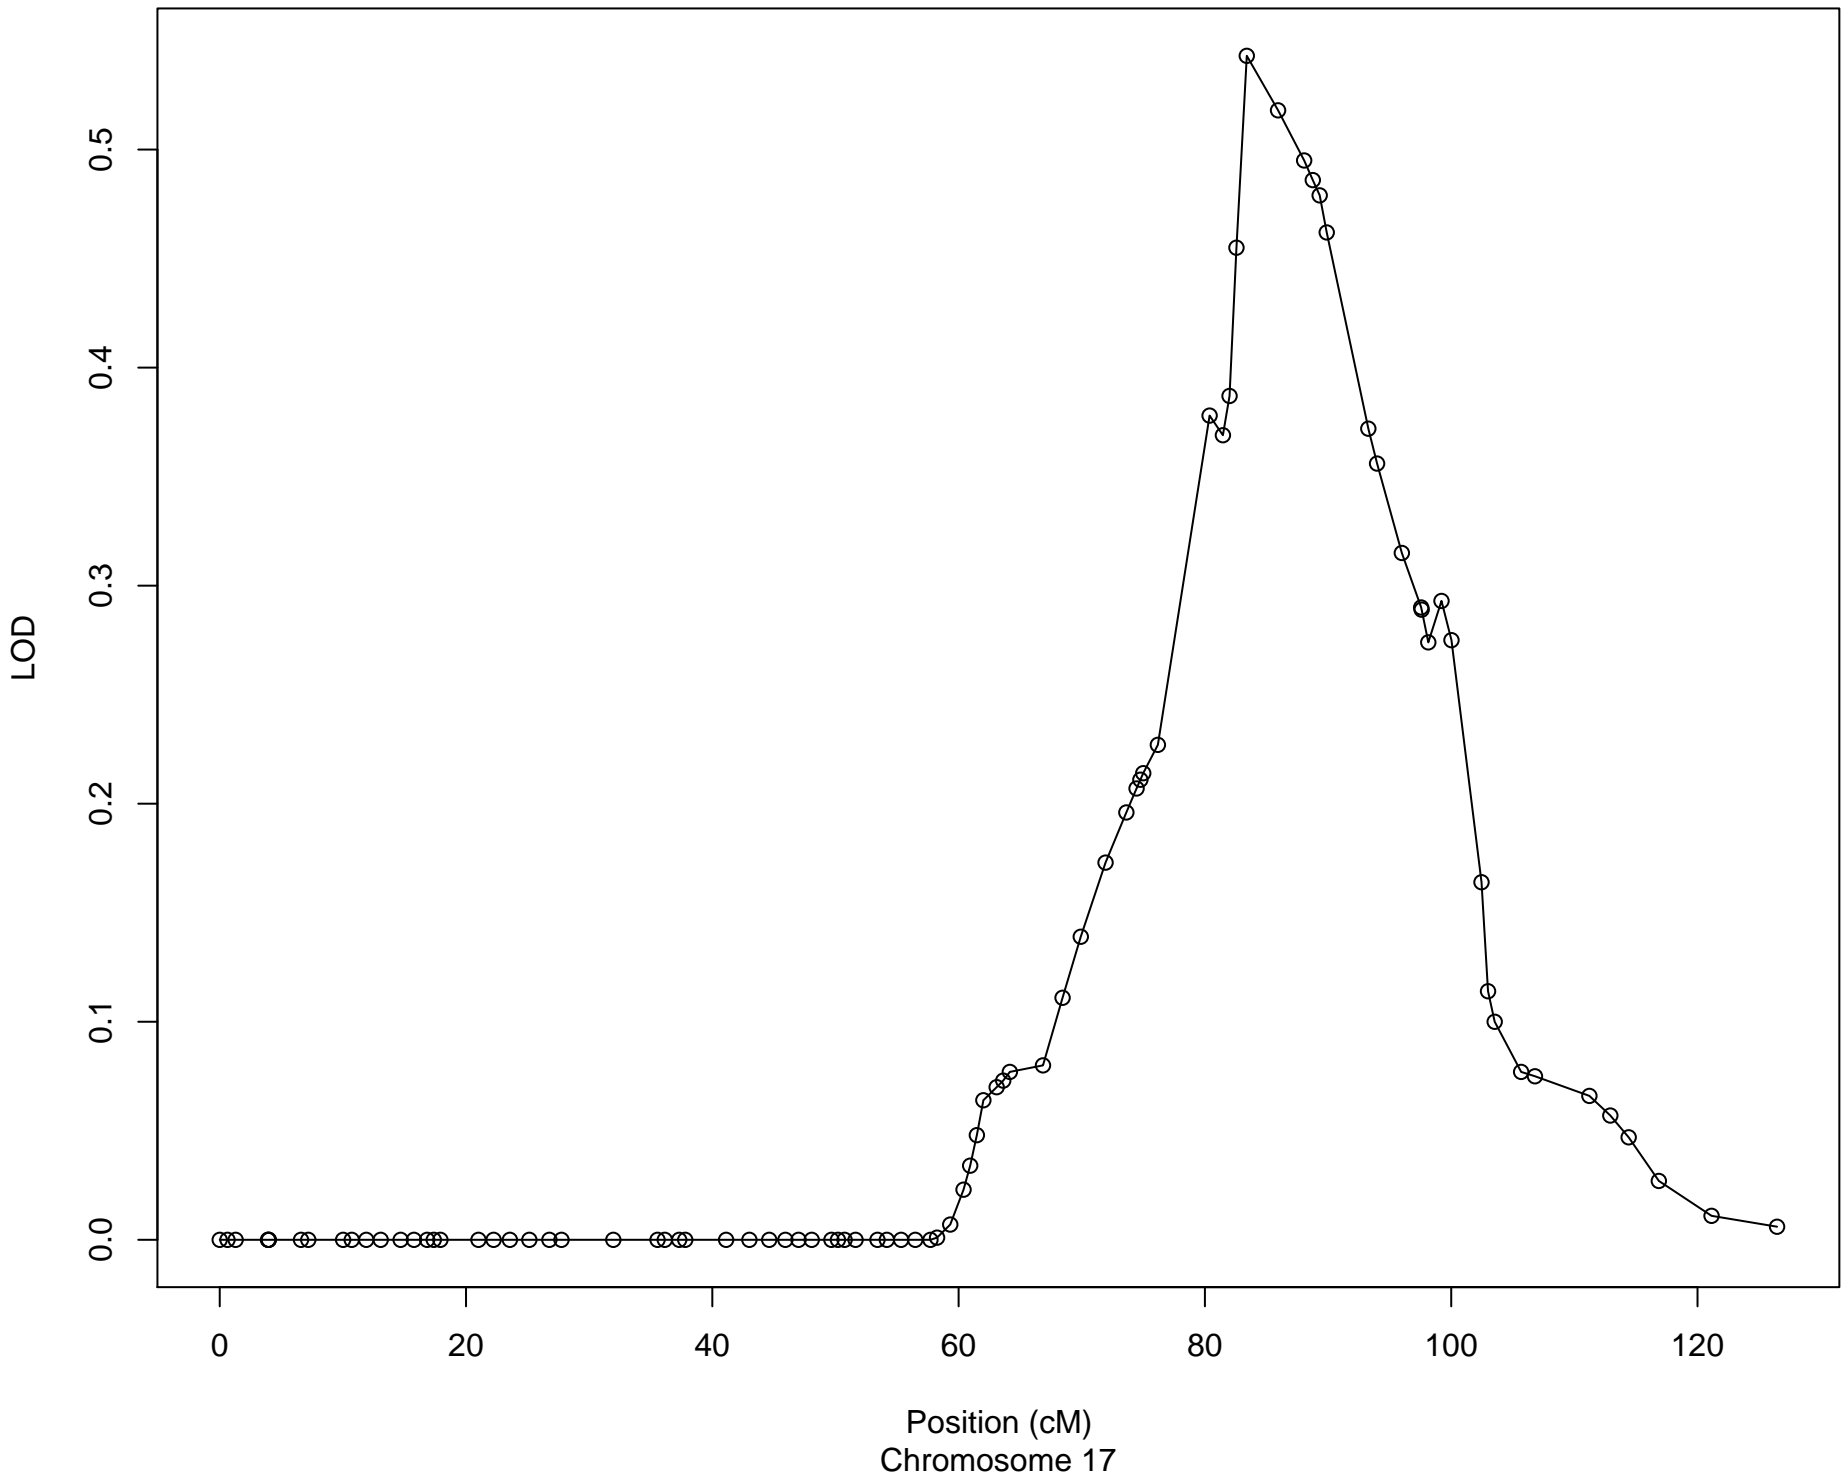

# IC50 (Camptothecin) (IC50\_CPT)

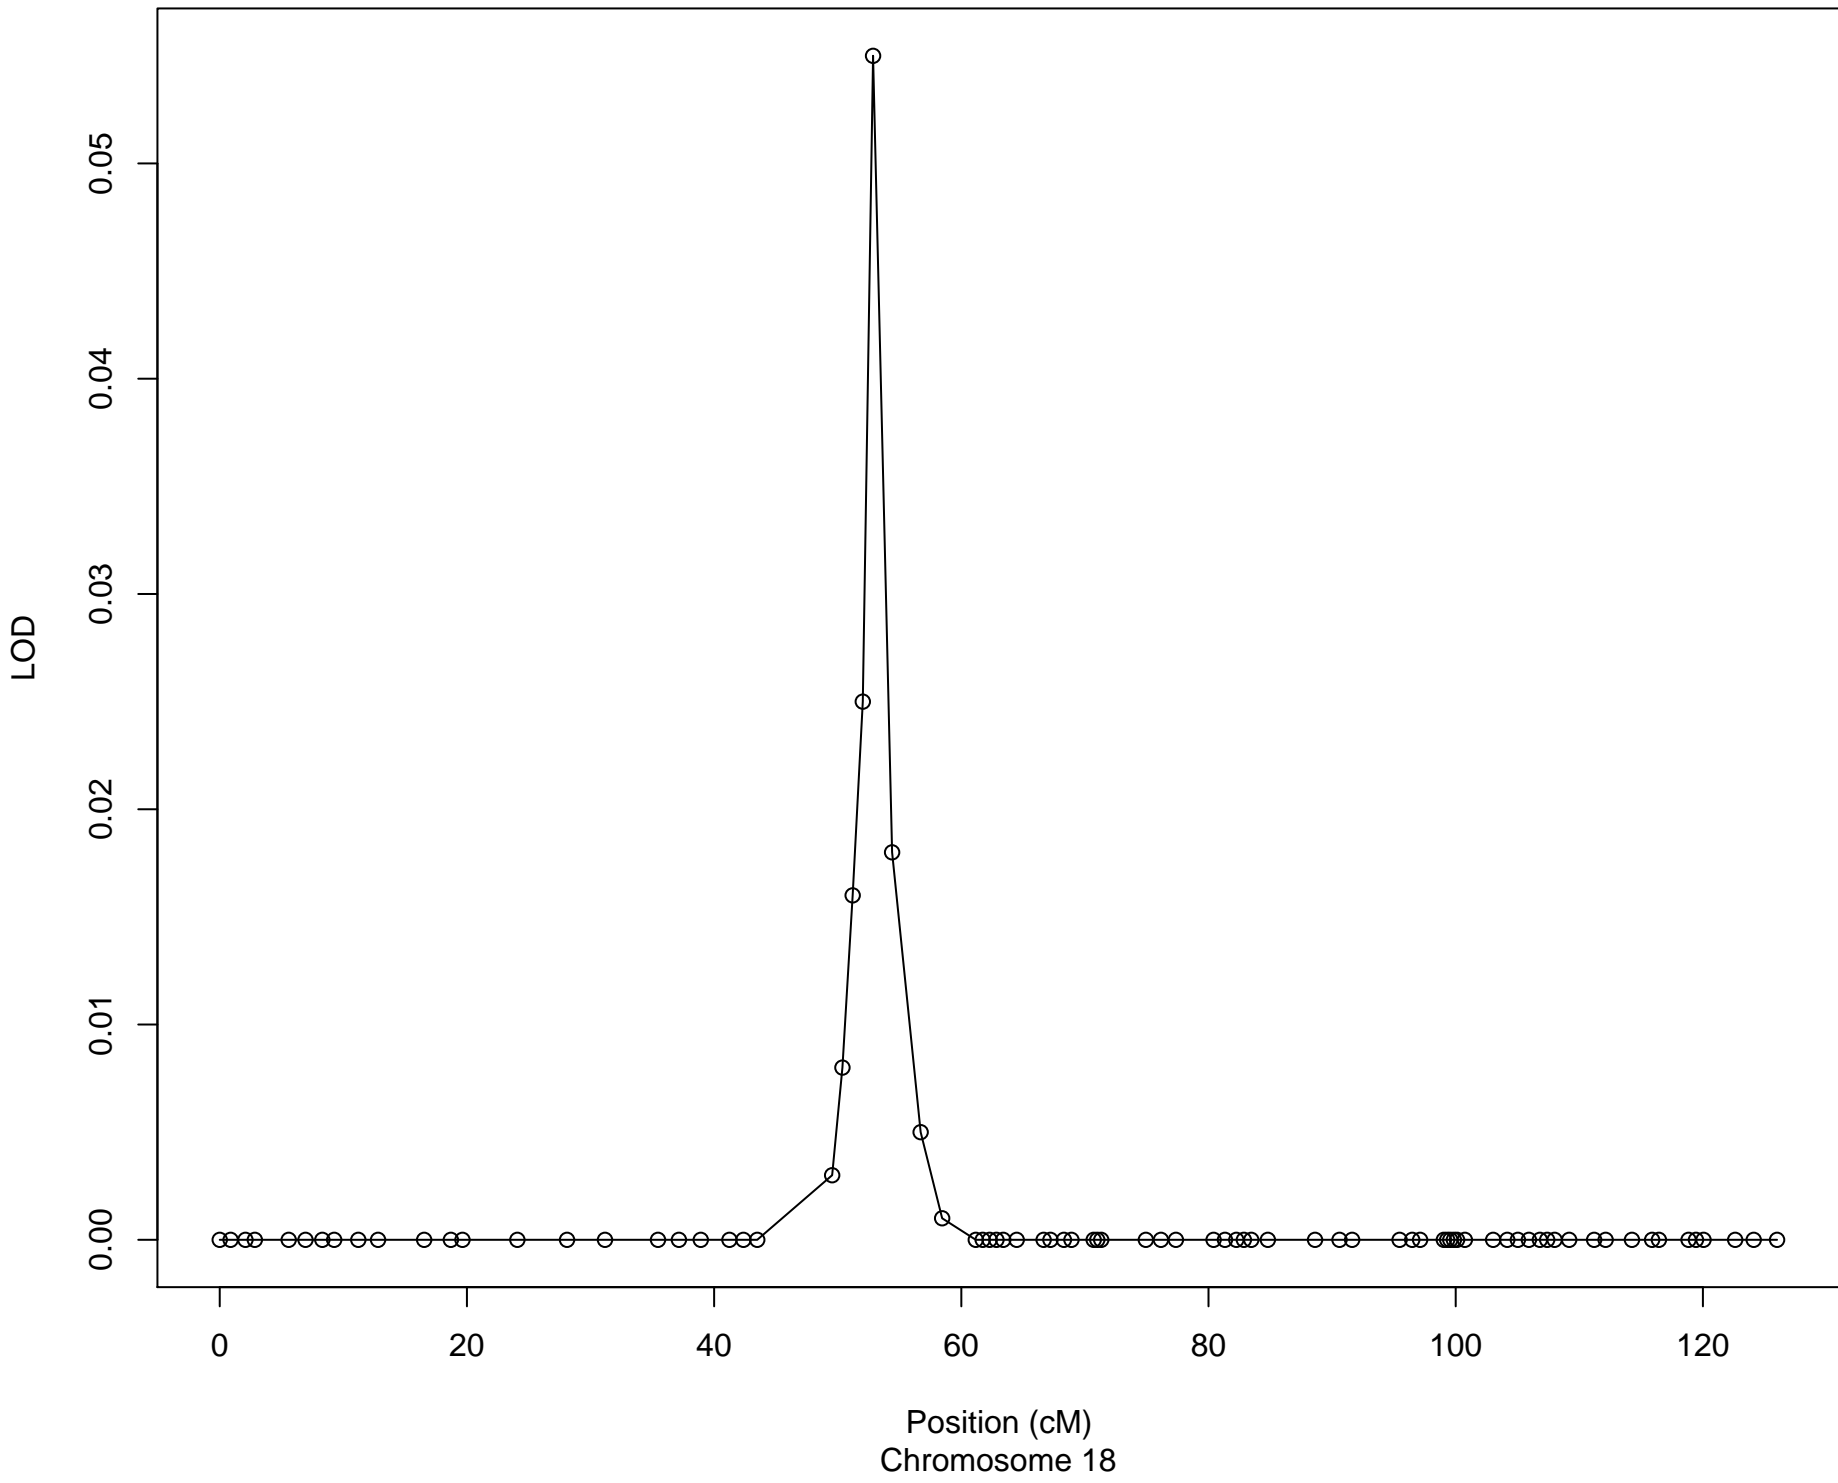

# IC50 (Camptothecin) (IC50\_CPT)

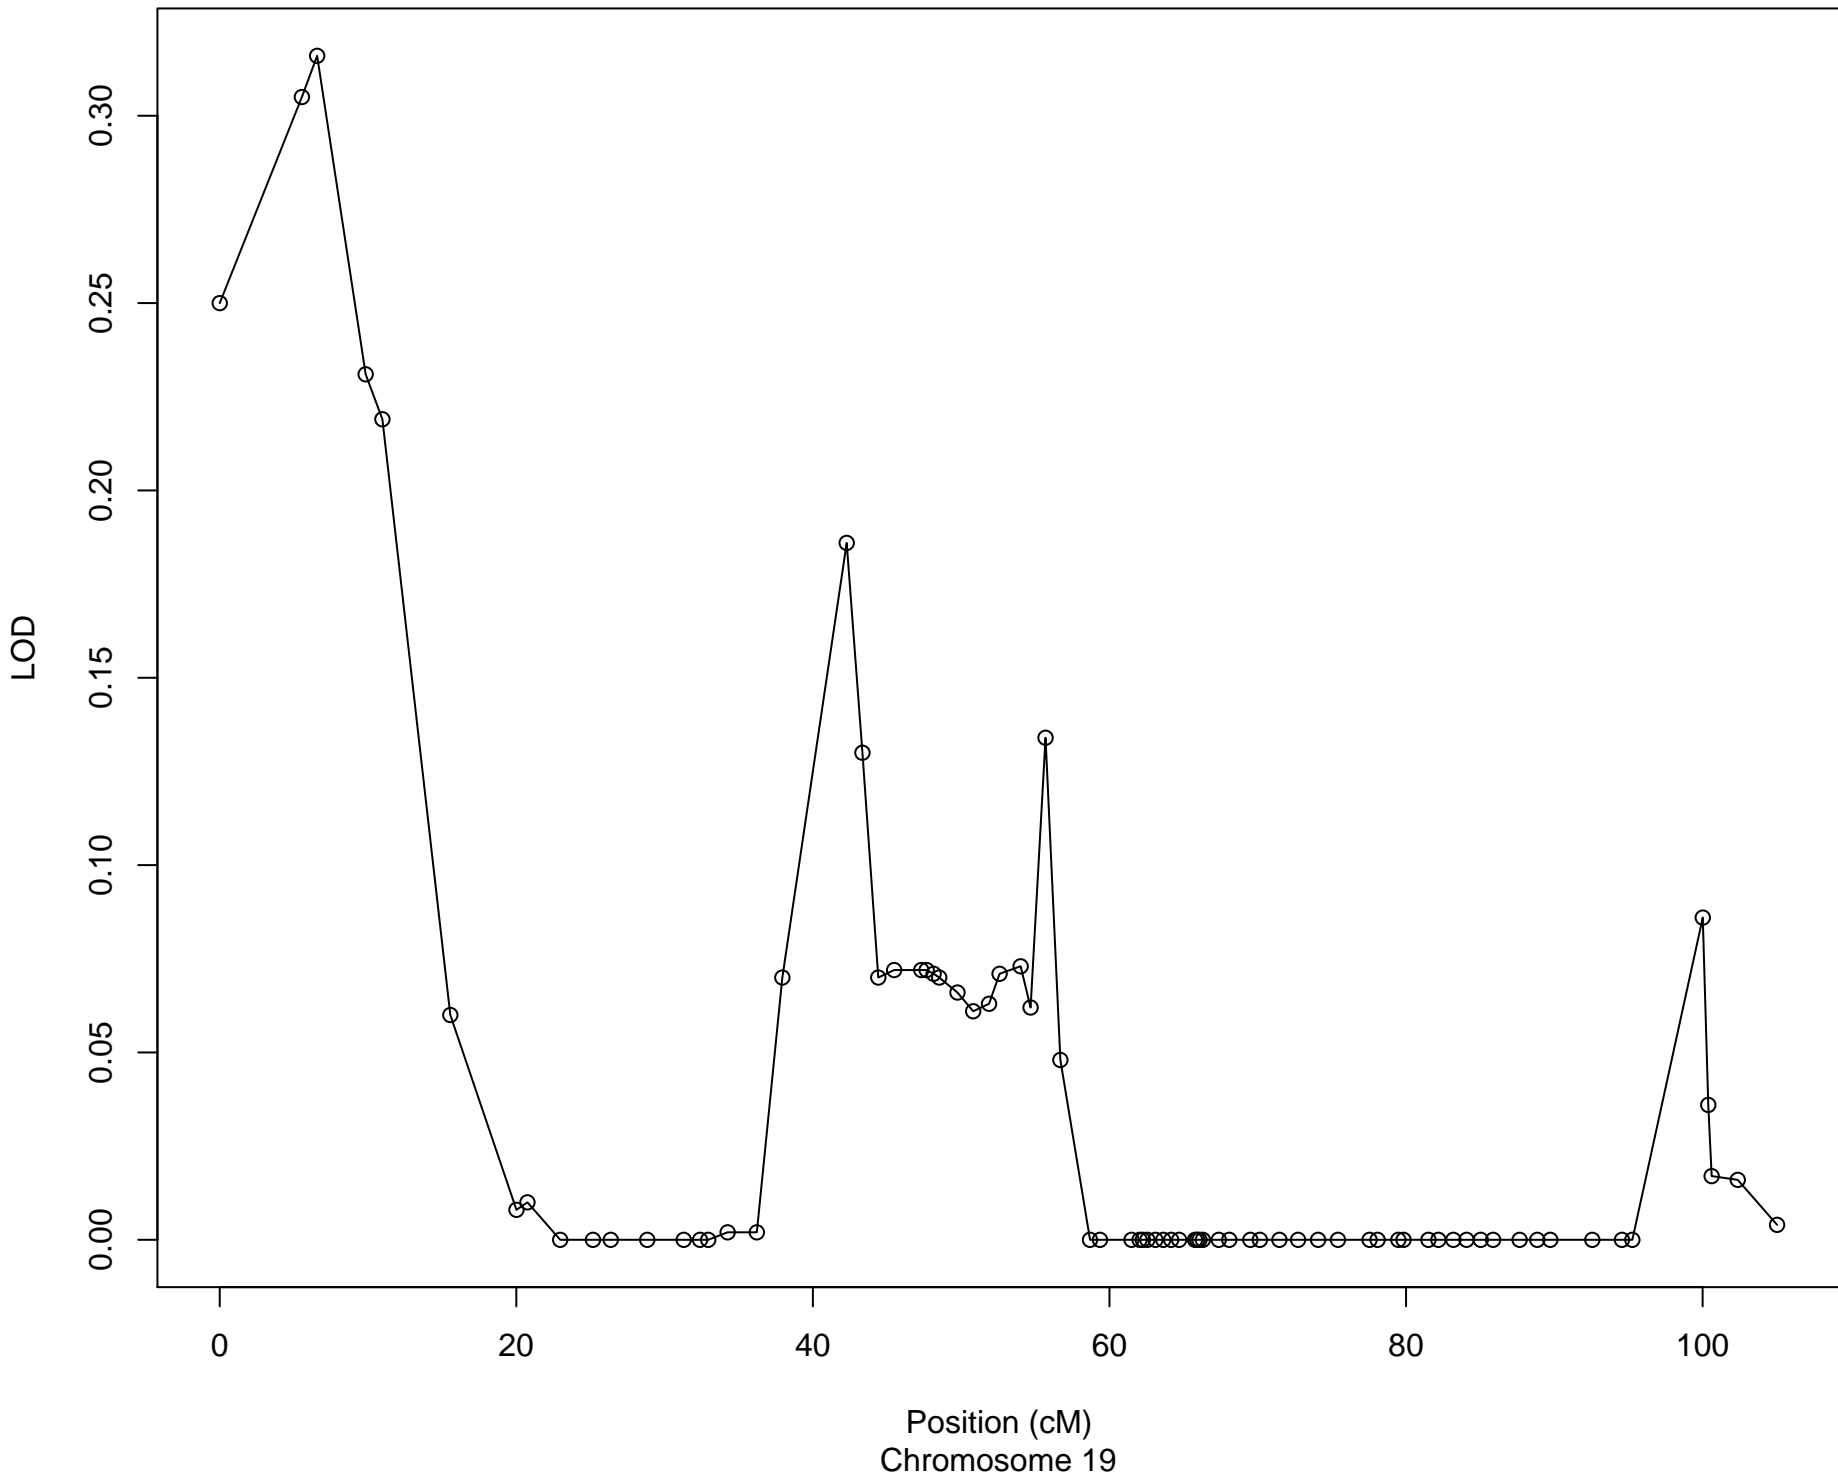

# IC50 (Camptothecin) (IC50\_CPT)

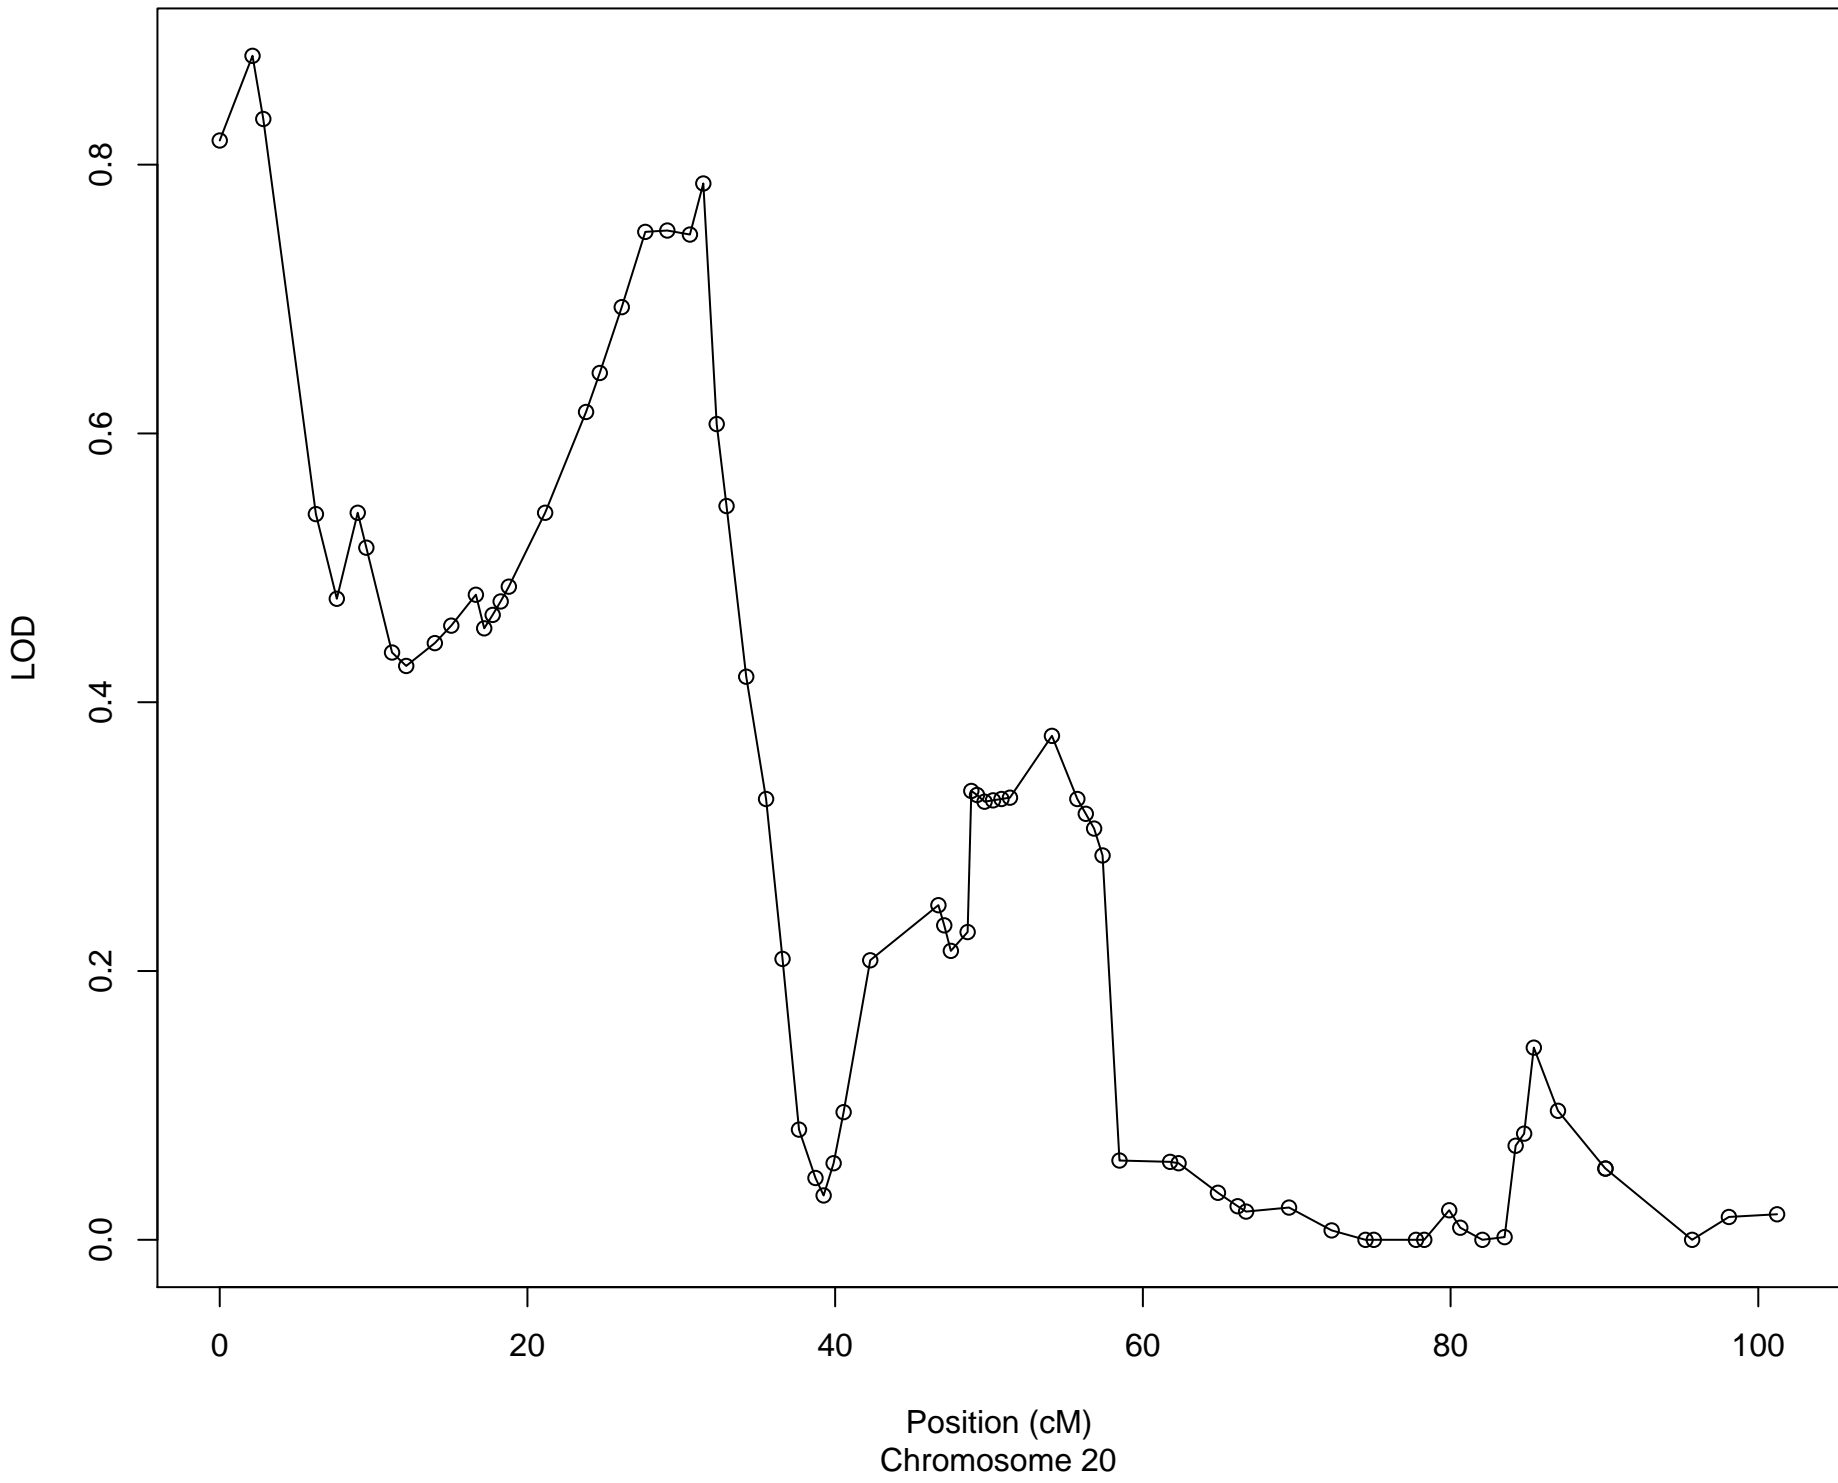

# IC50 (Camptothecin) (IC50\_CPT)

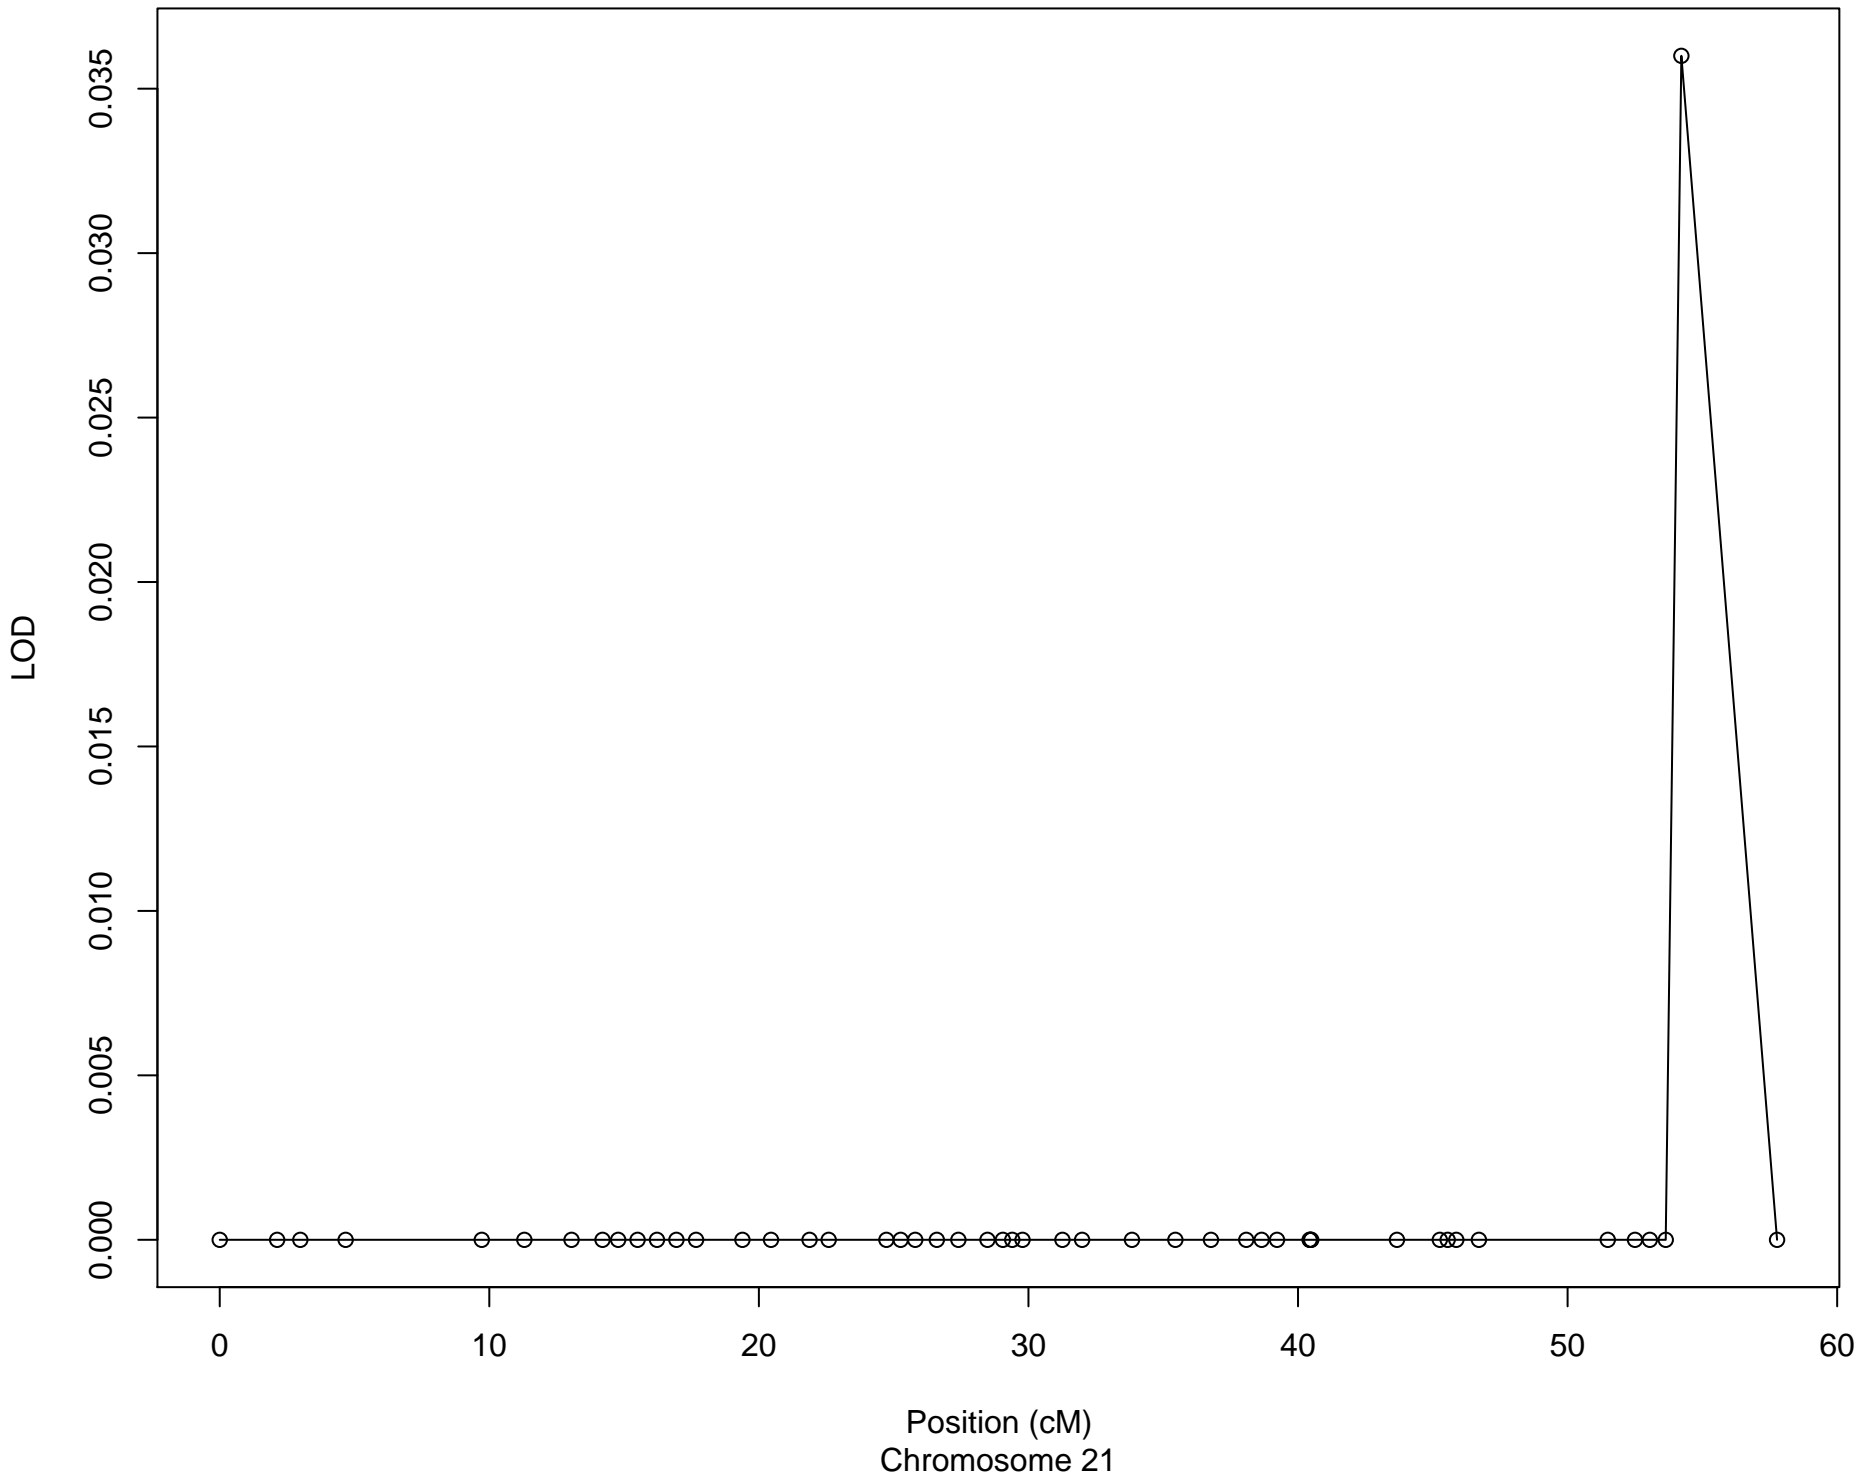

# IC50 (Camptothecin) (IC50\_CPT)

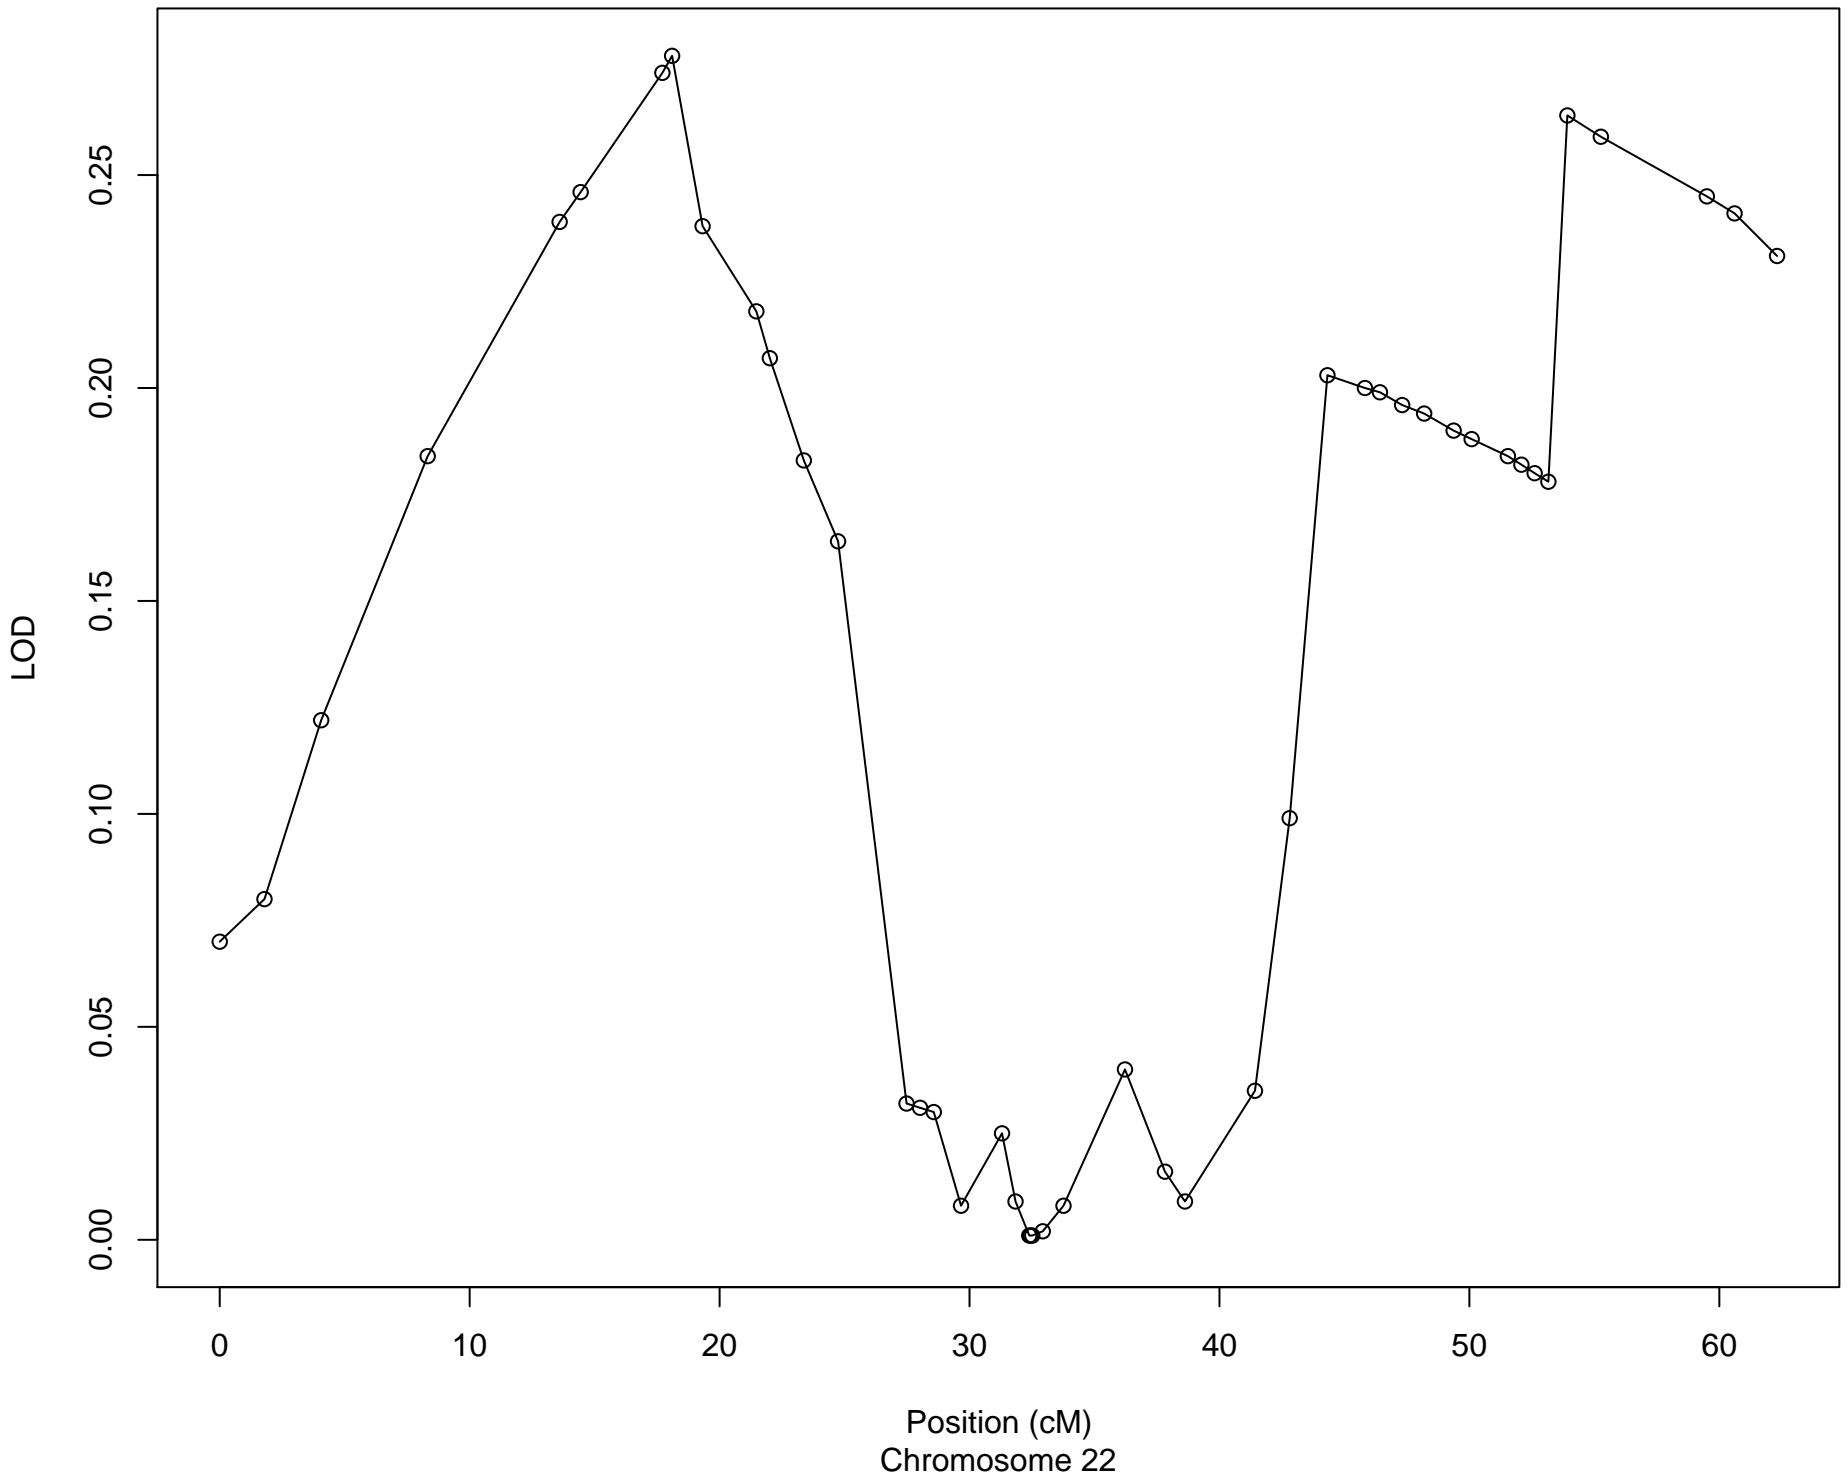



# IC50 (Irinotecan) (IC50\_CPT11)

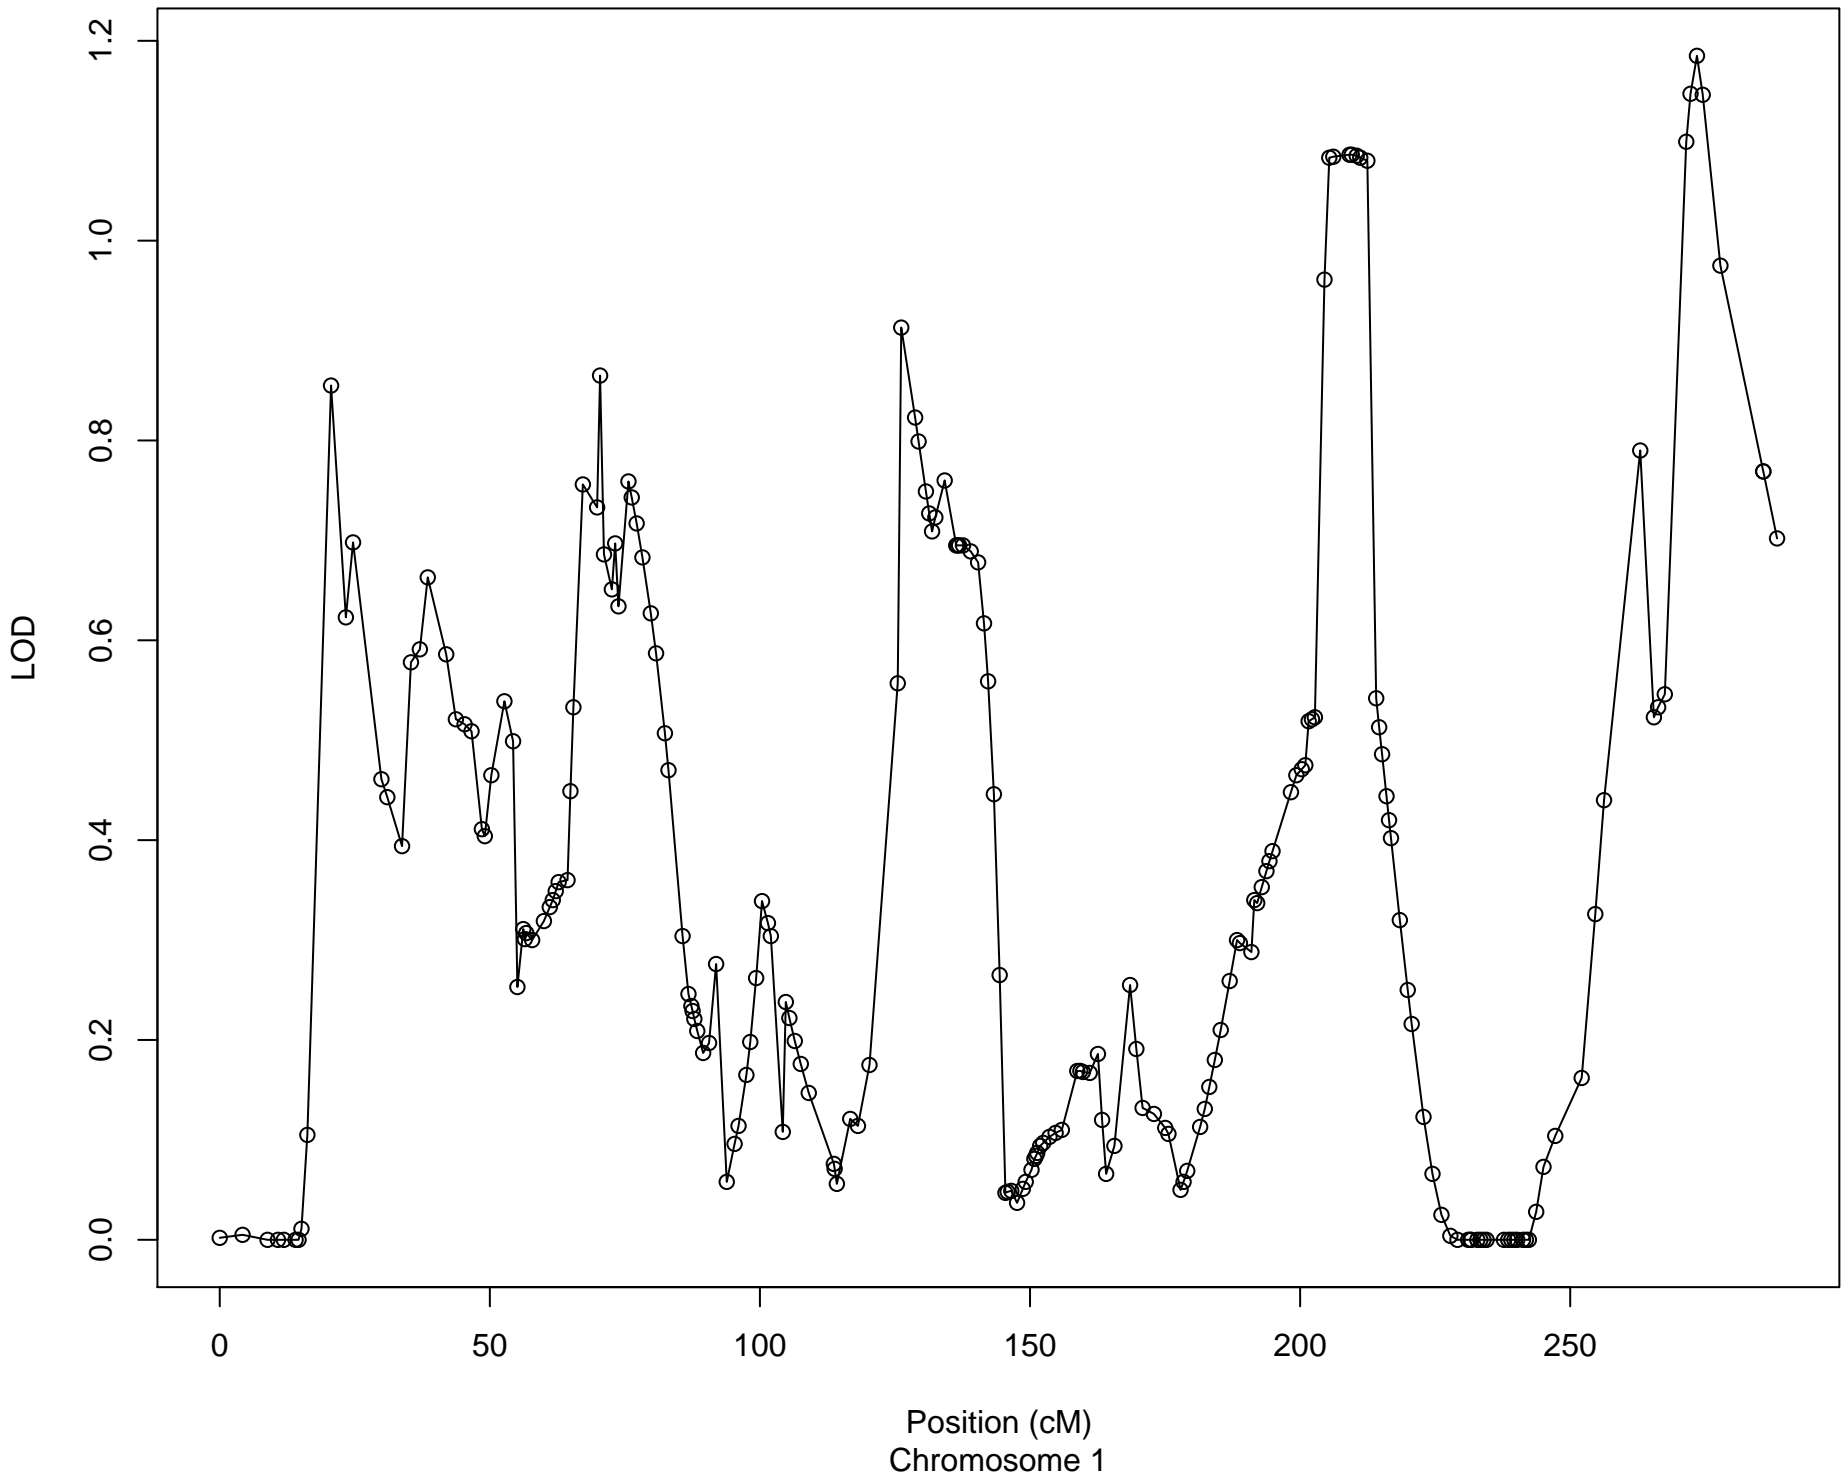

# IC50 (Irinotecan) (IC50\_CPT11)

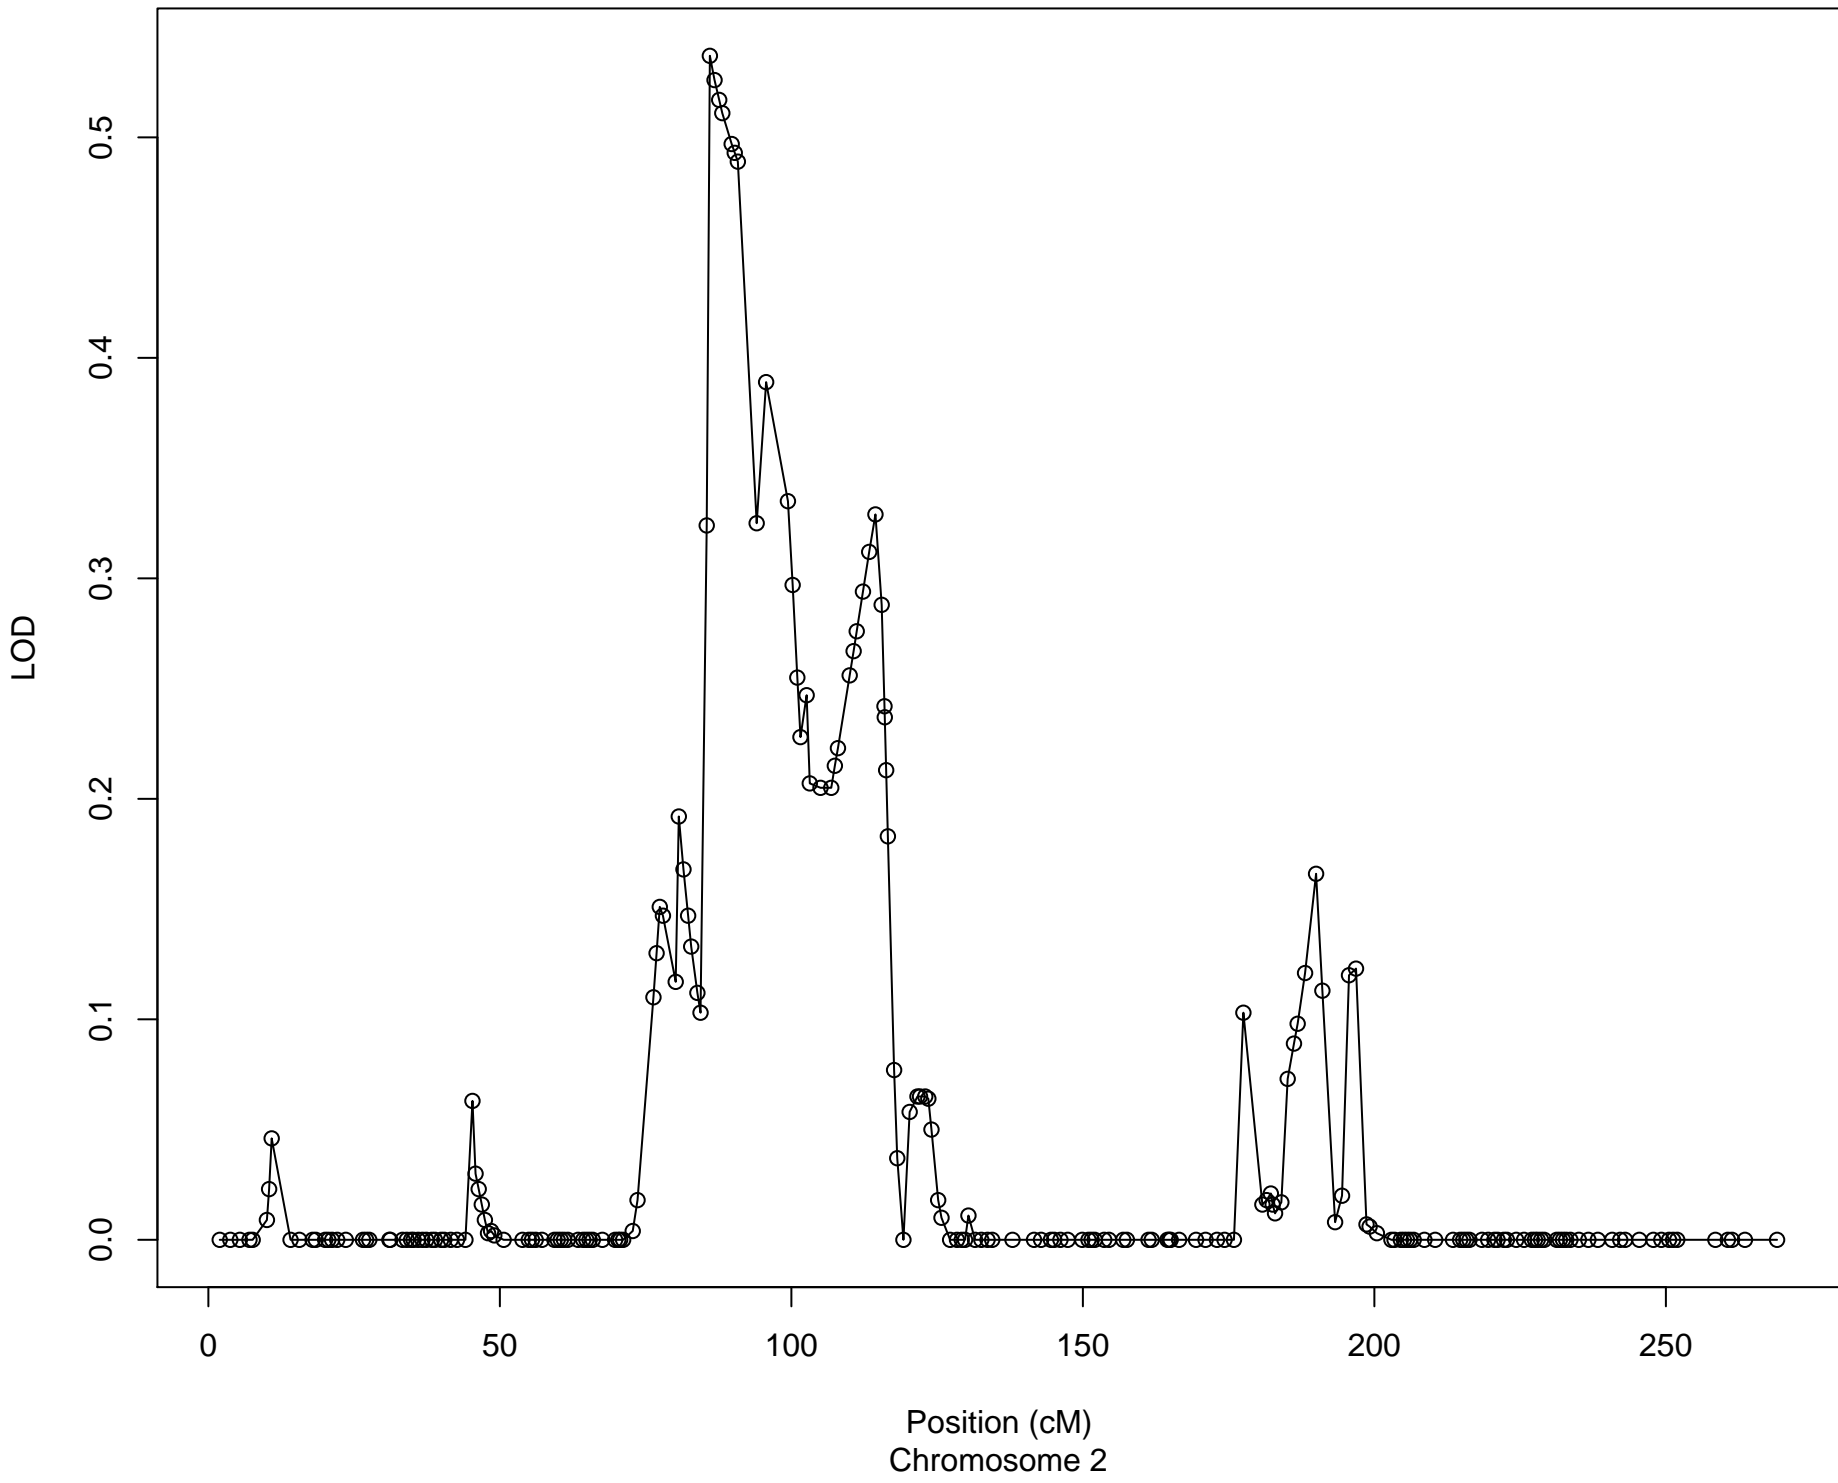

# IC50 (Irinotecan) (IC50\_CPT11)

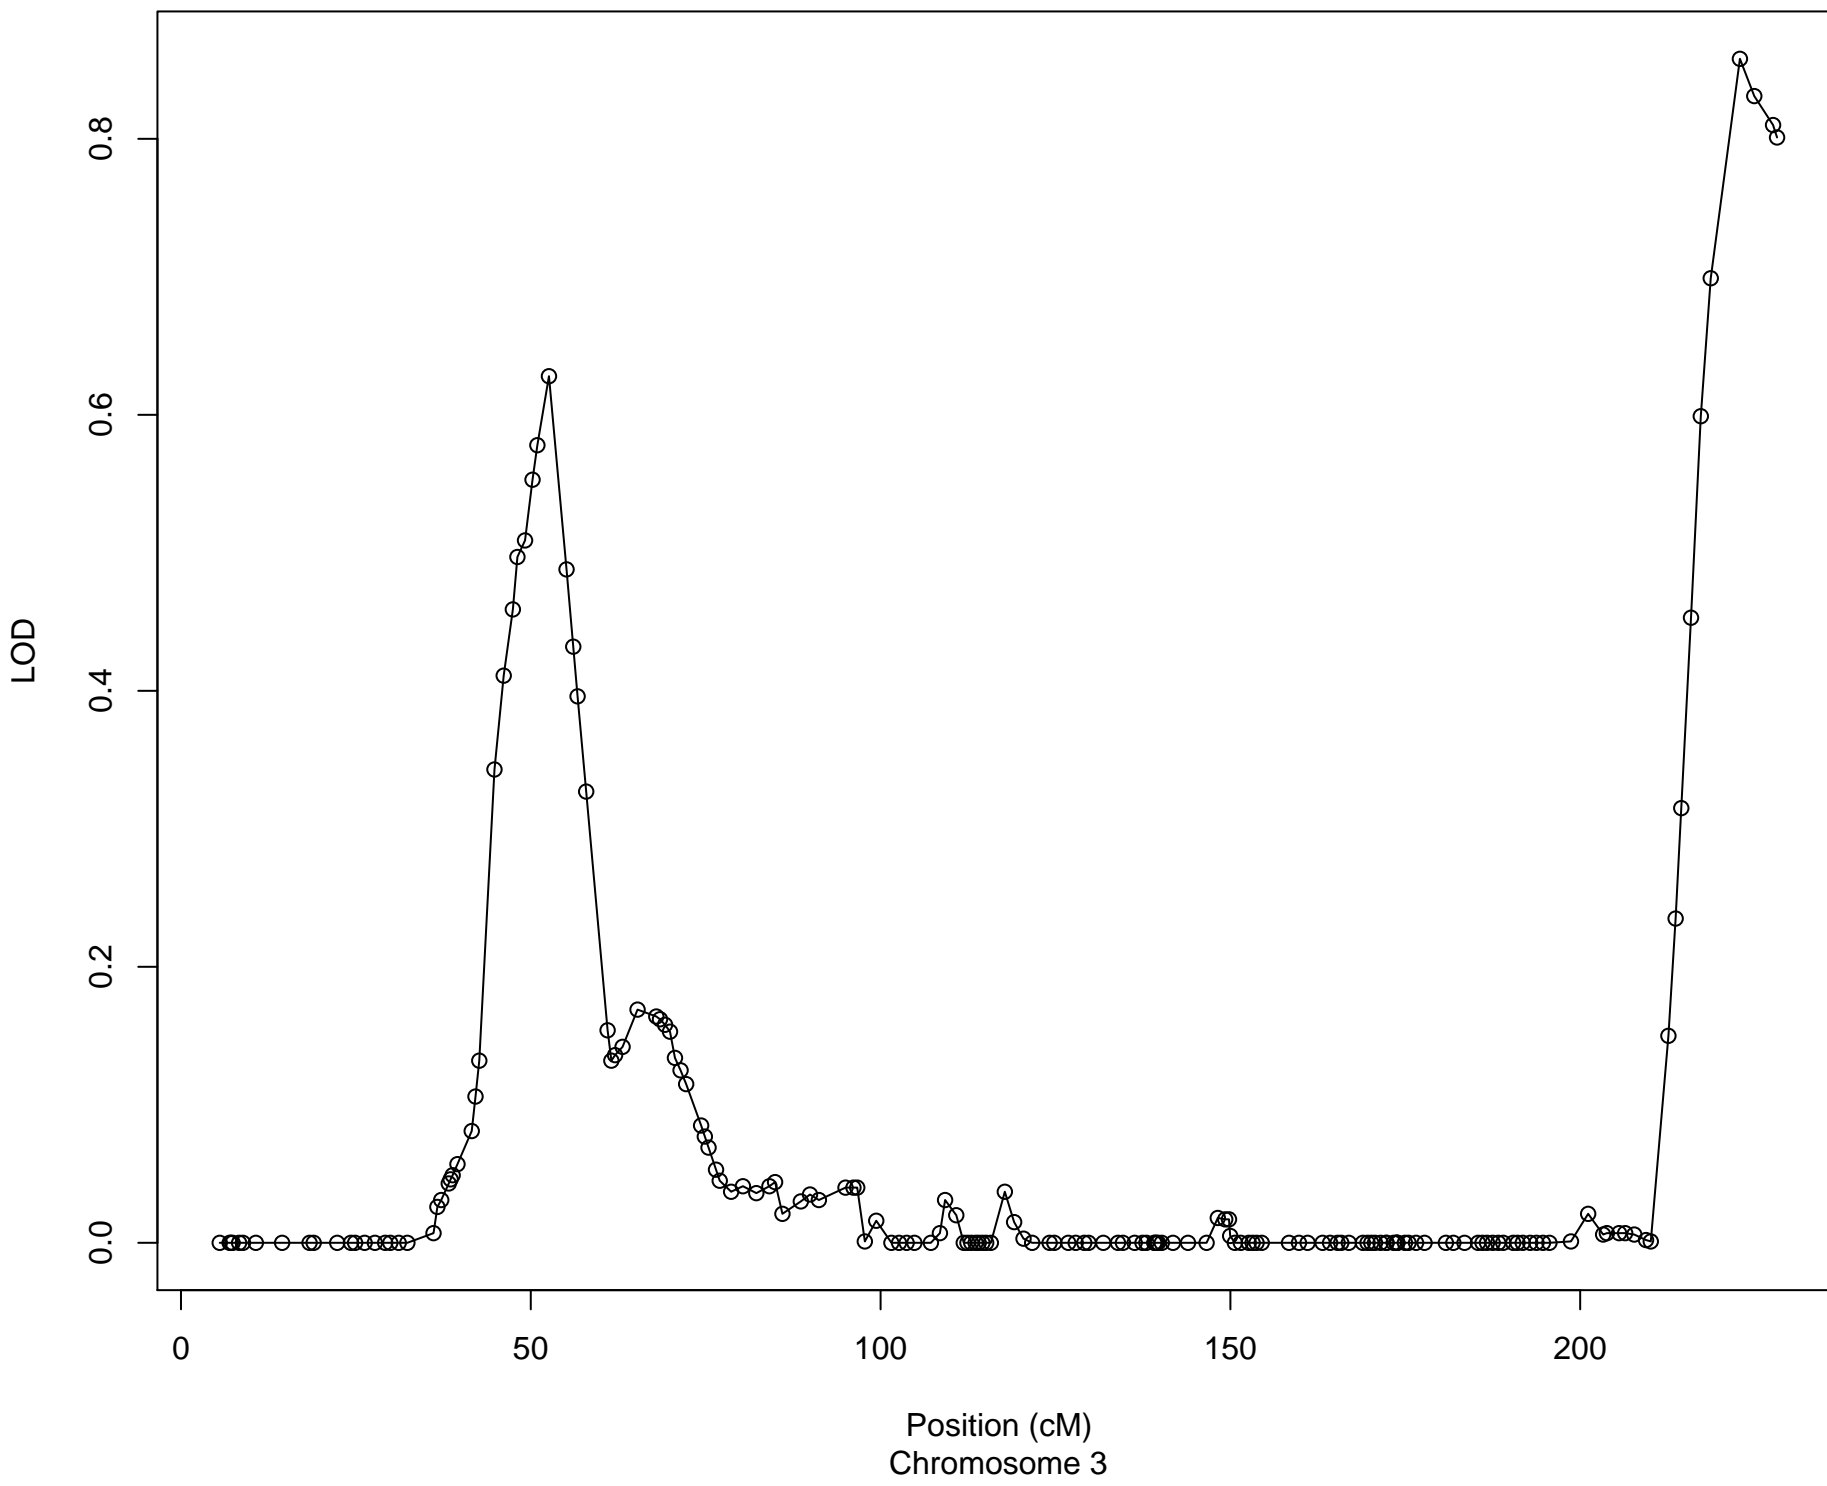

# IC50 (Irinotecan) (IC50\_CPT11)

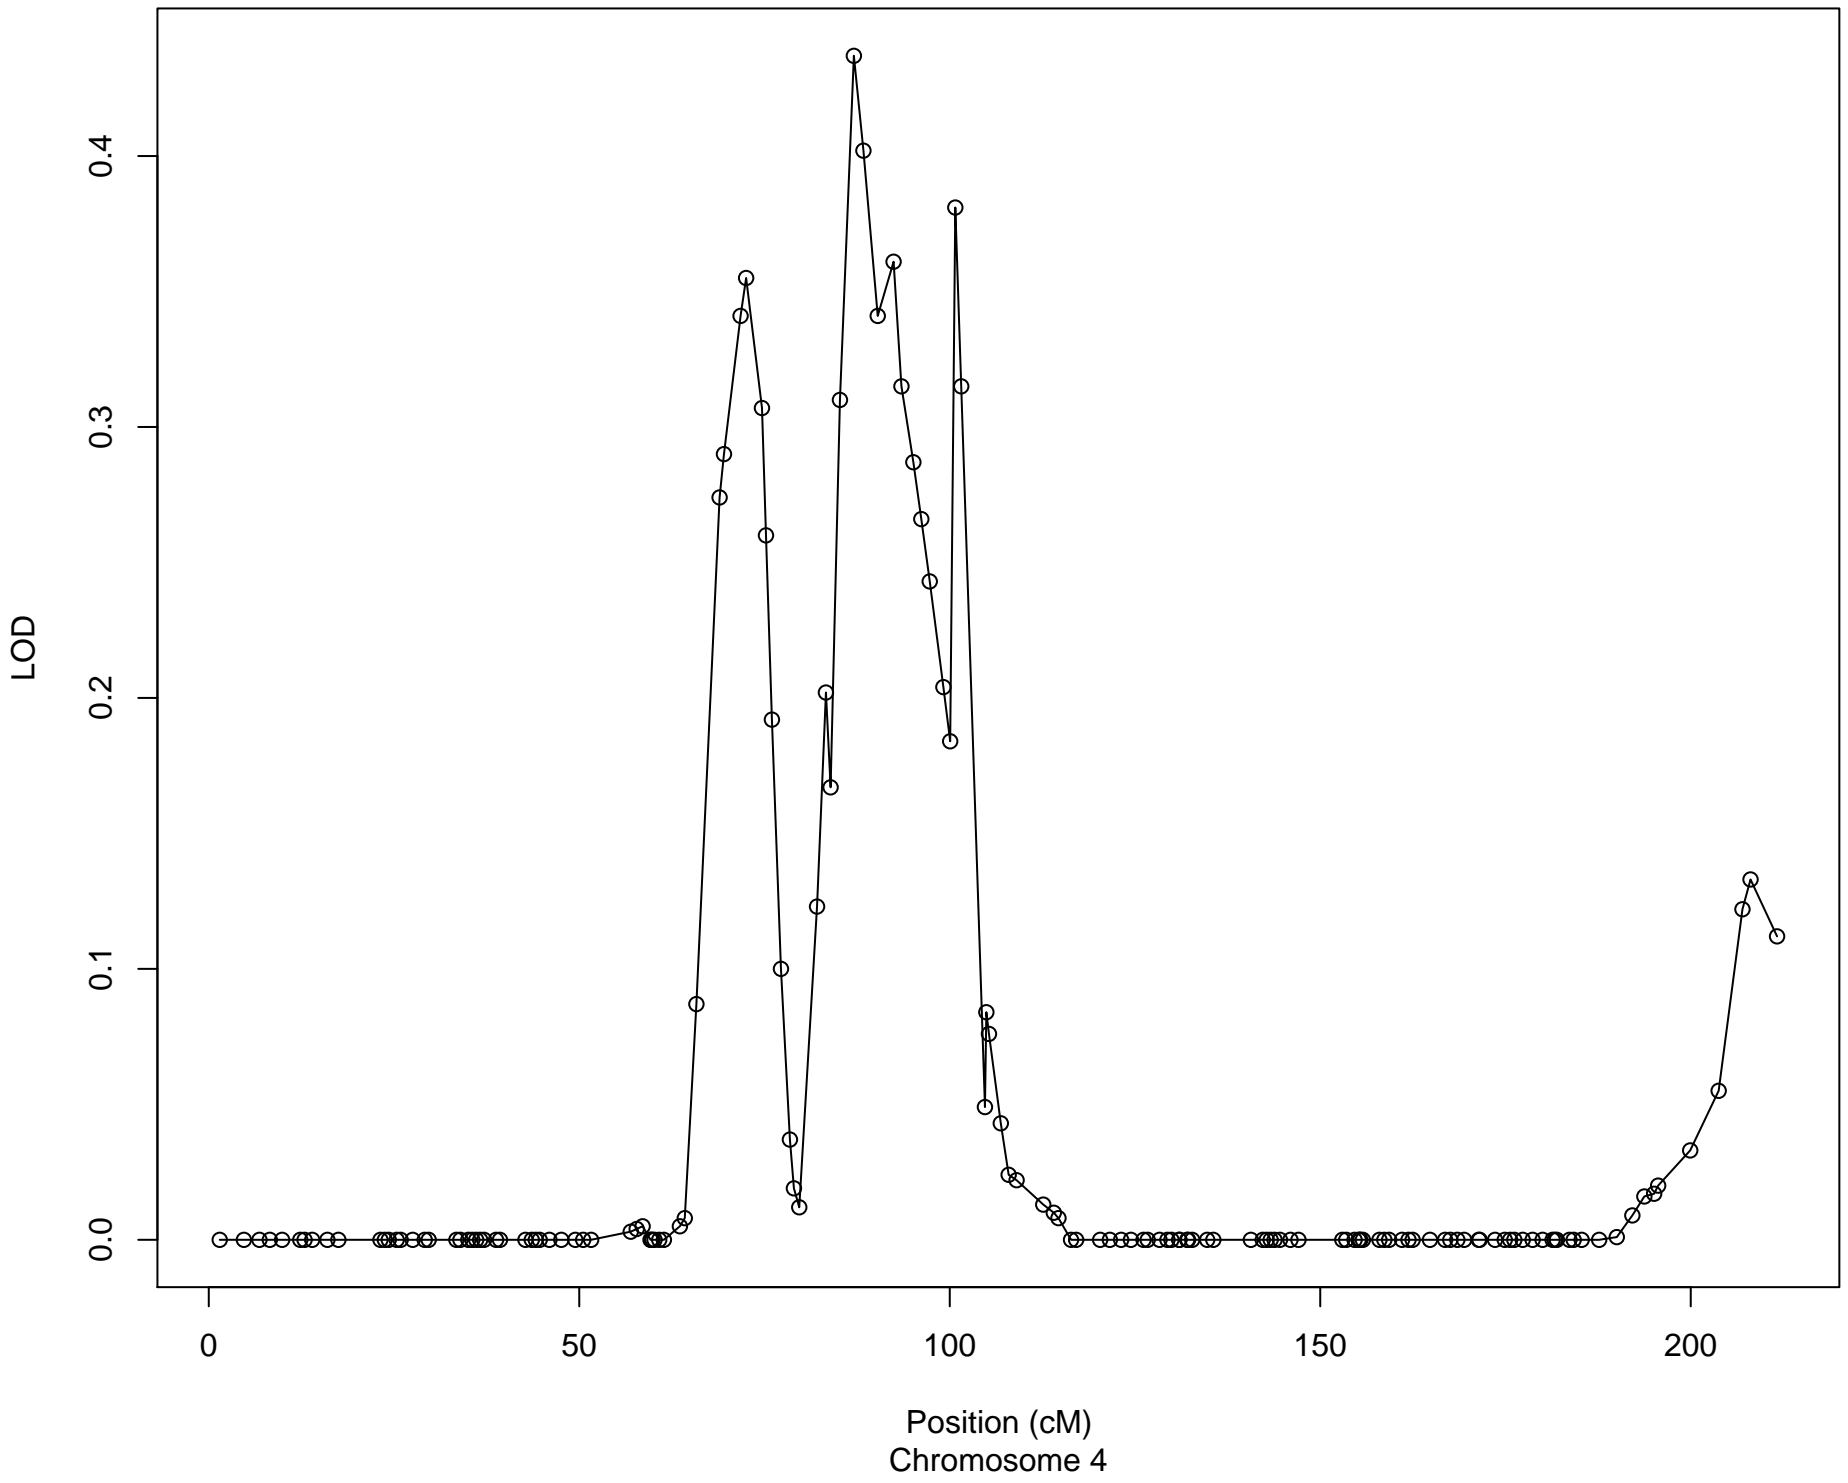

# IC50 (Irinotecan) (IC50\_CPT11)

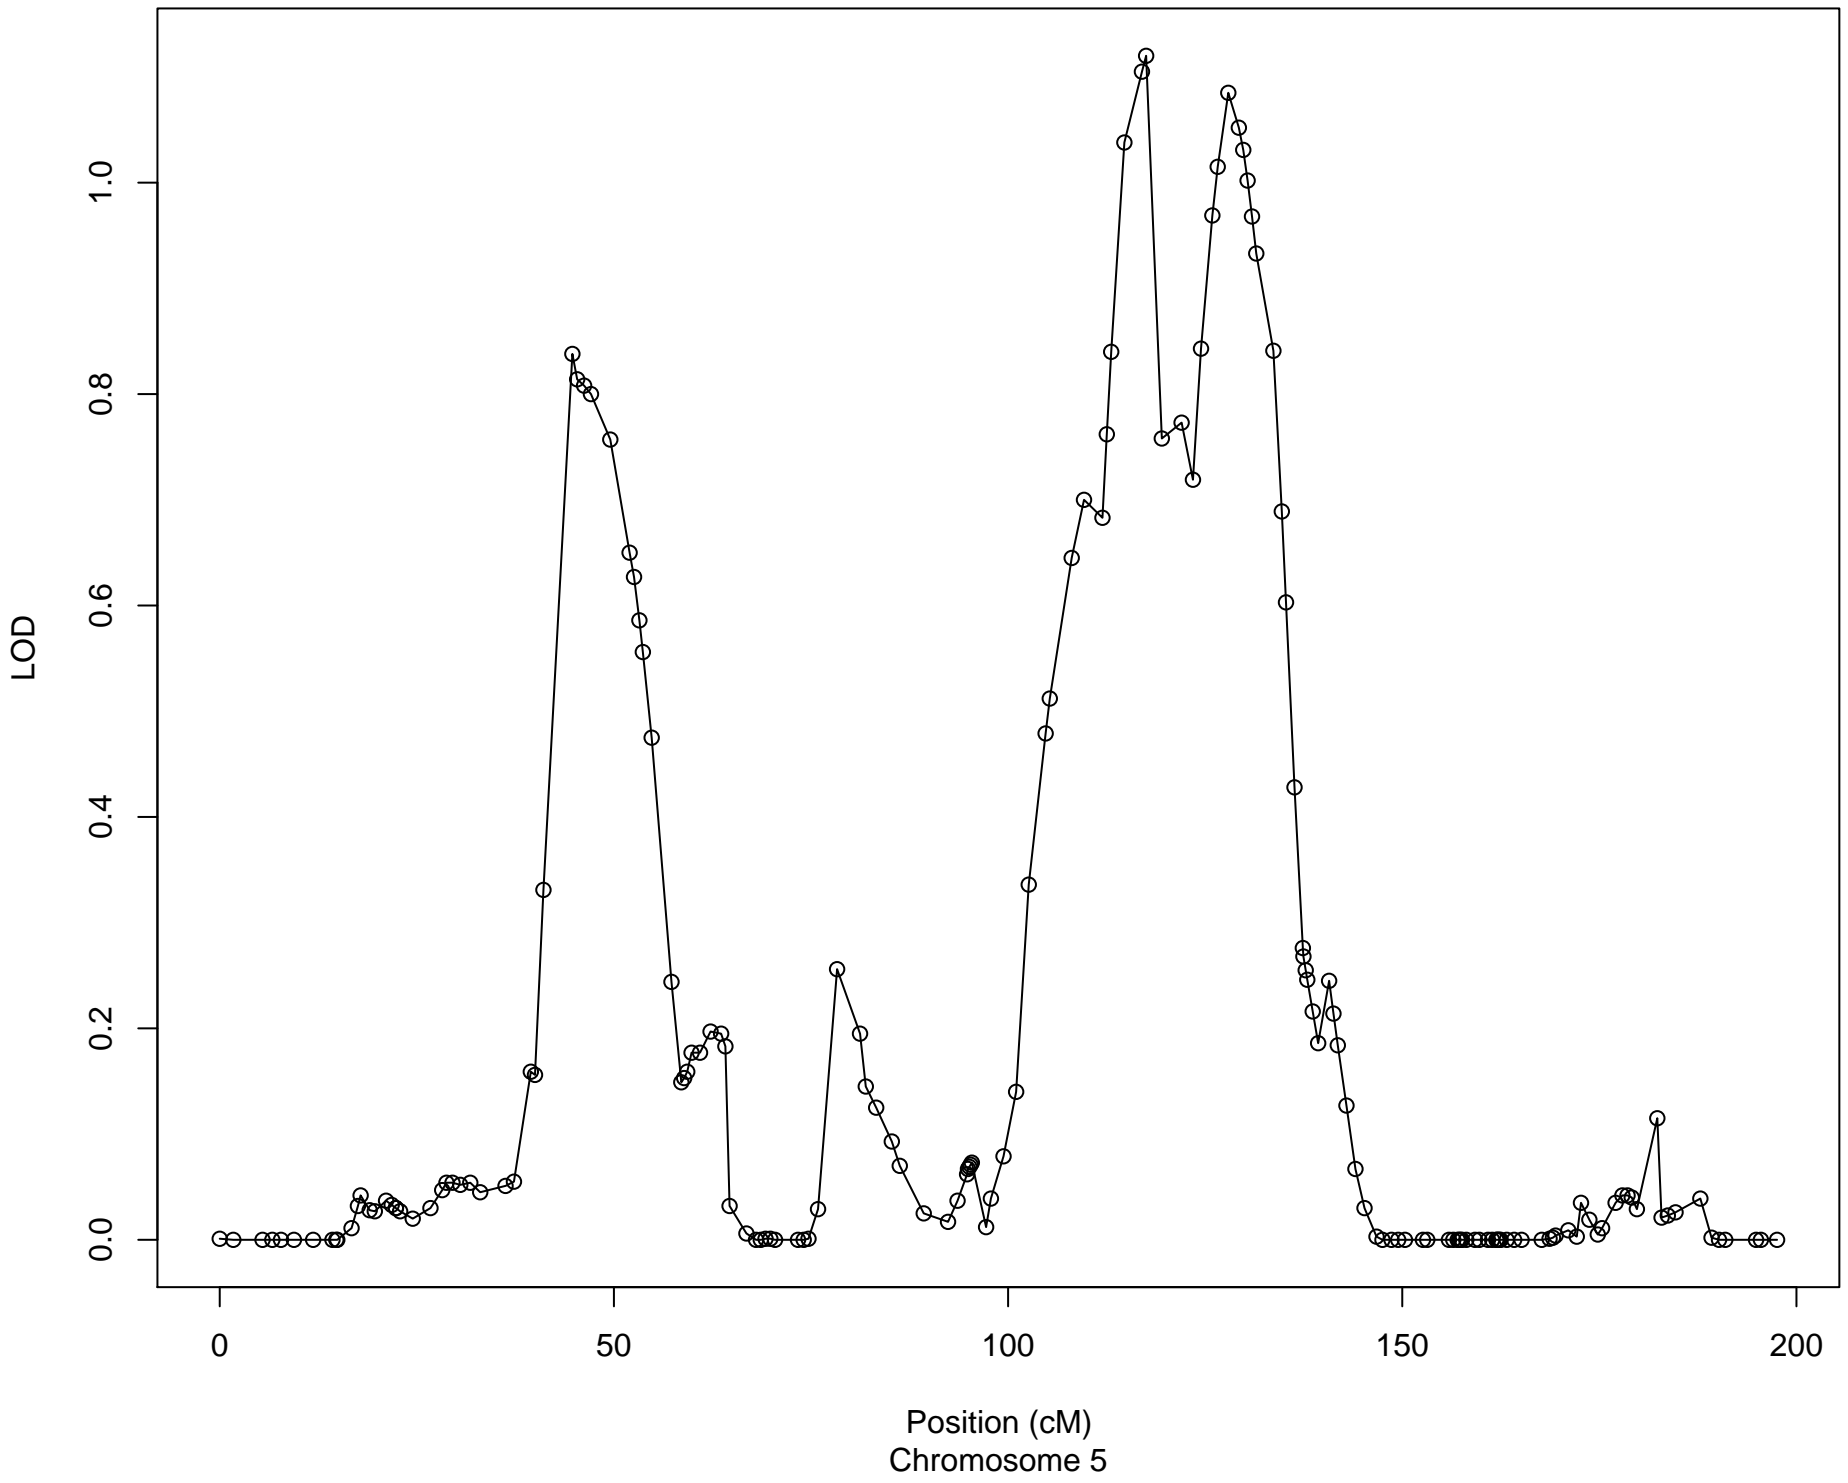

# IC50 (Irinotecan) (IC50\_CPT11)

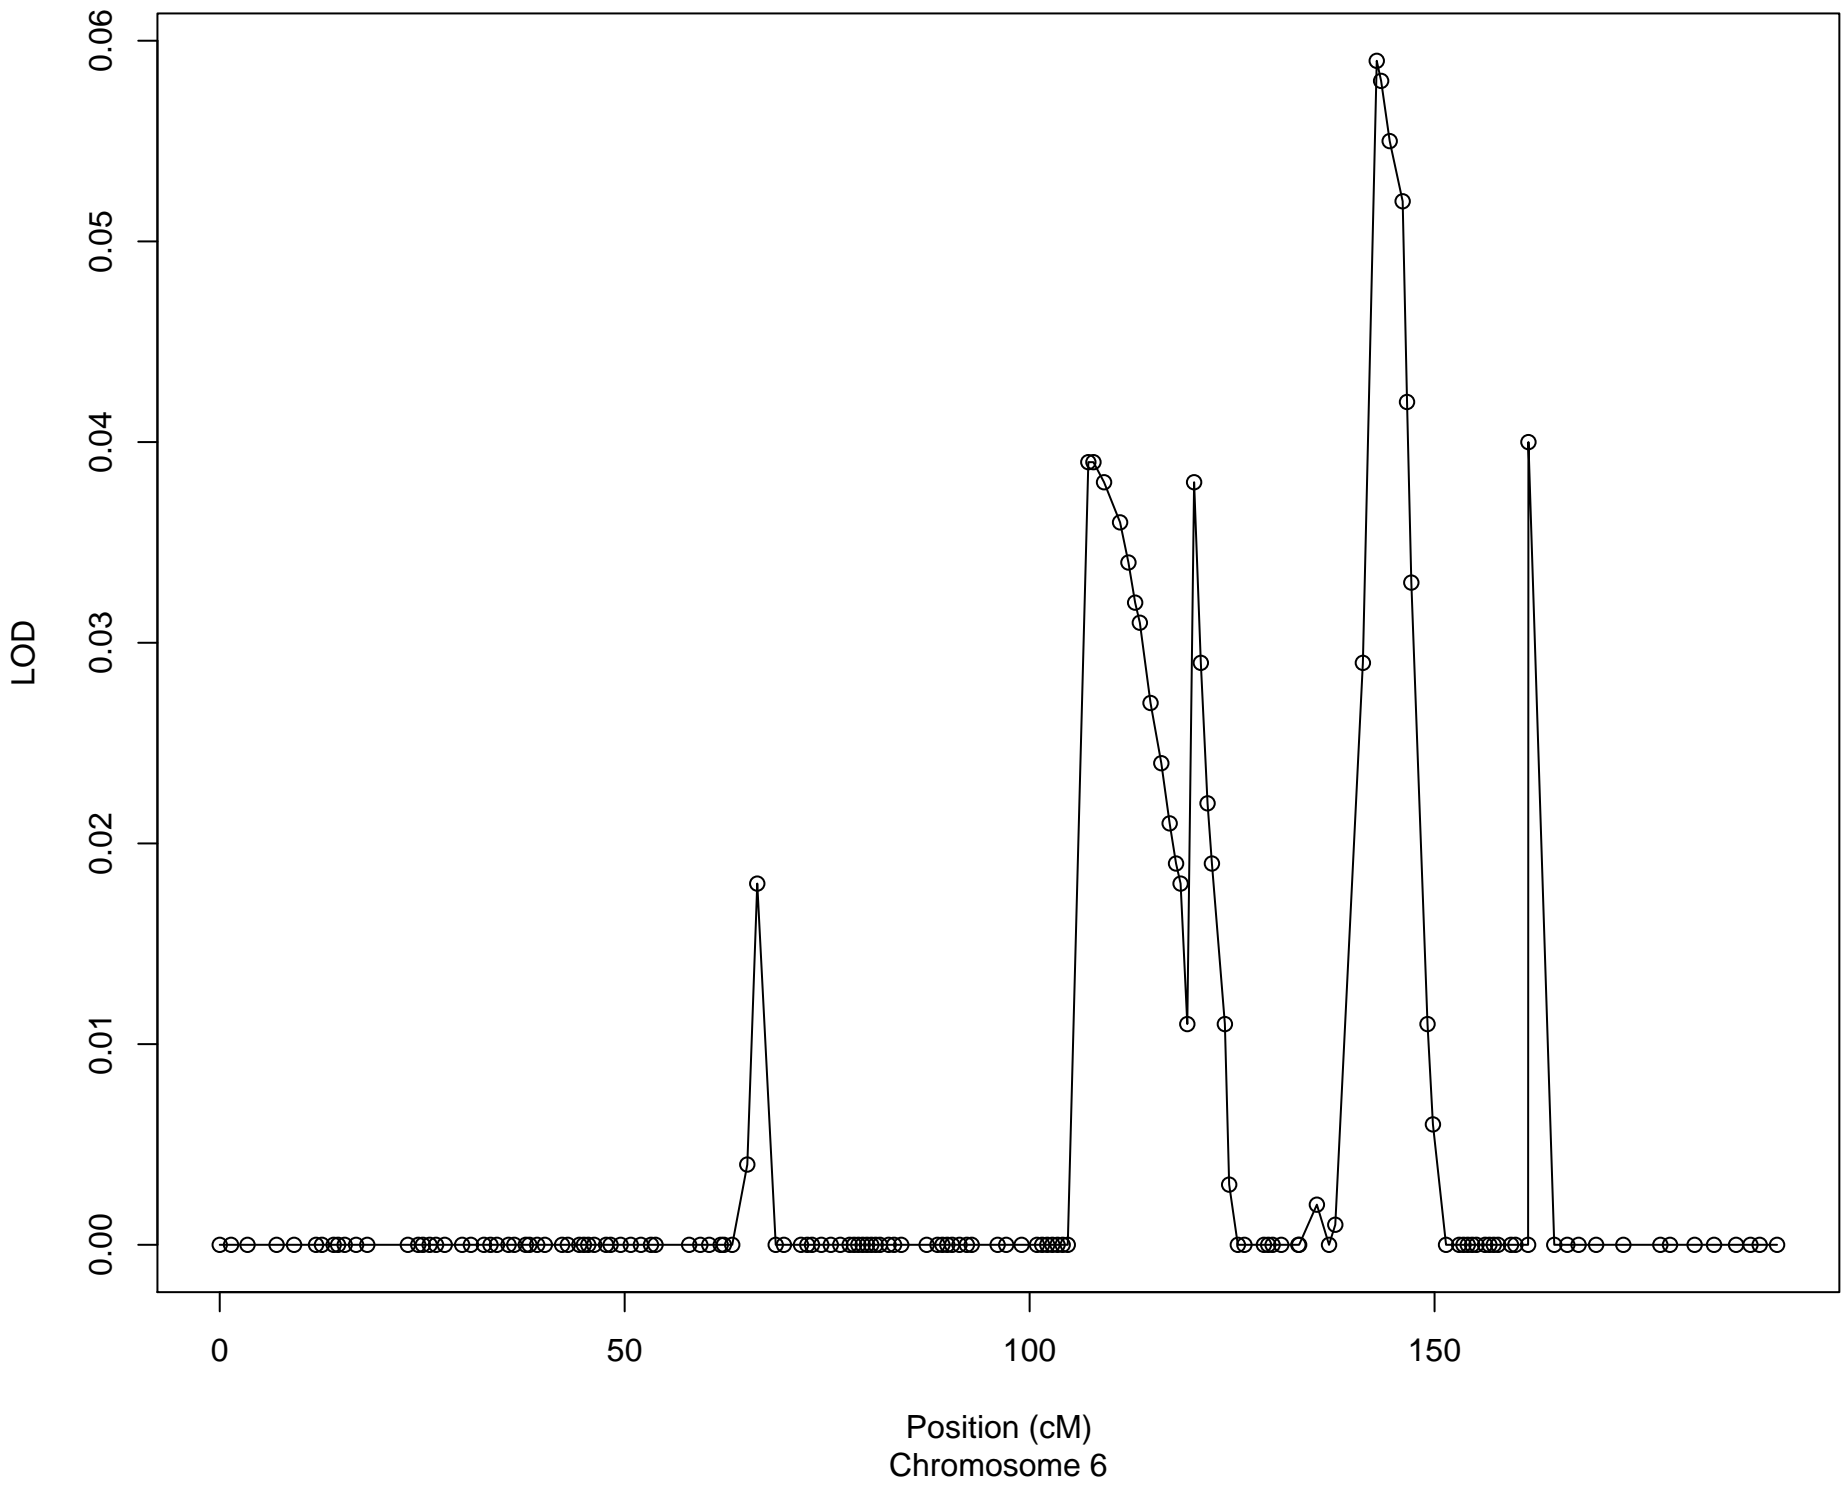

# IC50 (Irinotecan) (IC50\_CPT11)

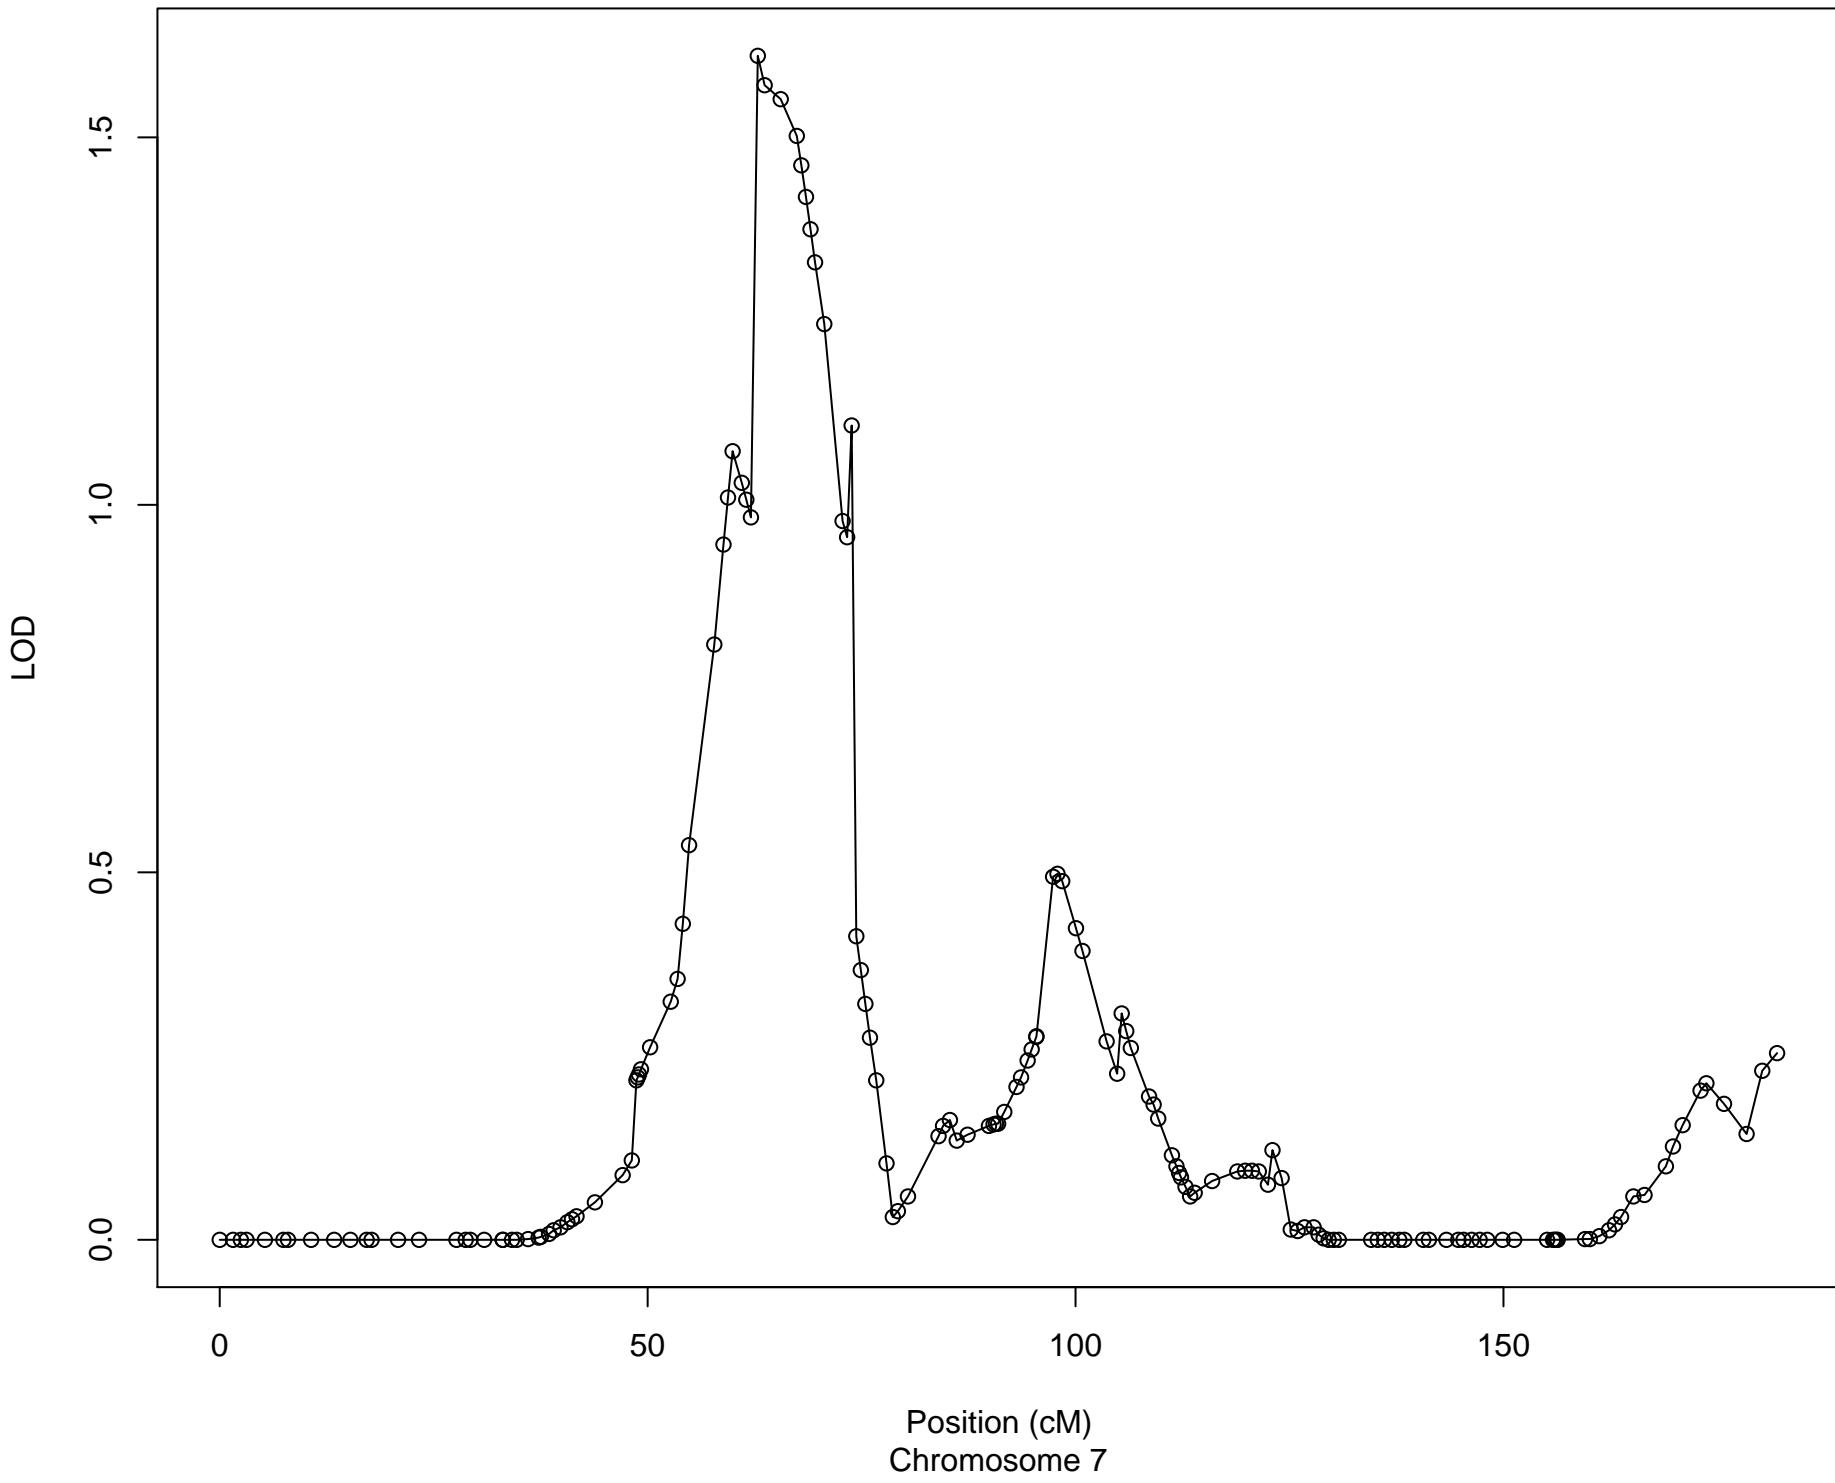

# IC50 (Irinotecan) (IC50\_CPT11)

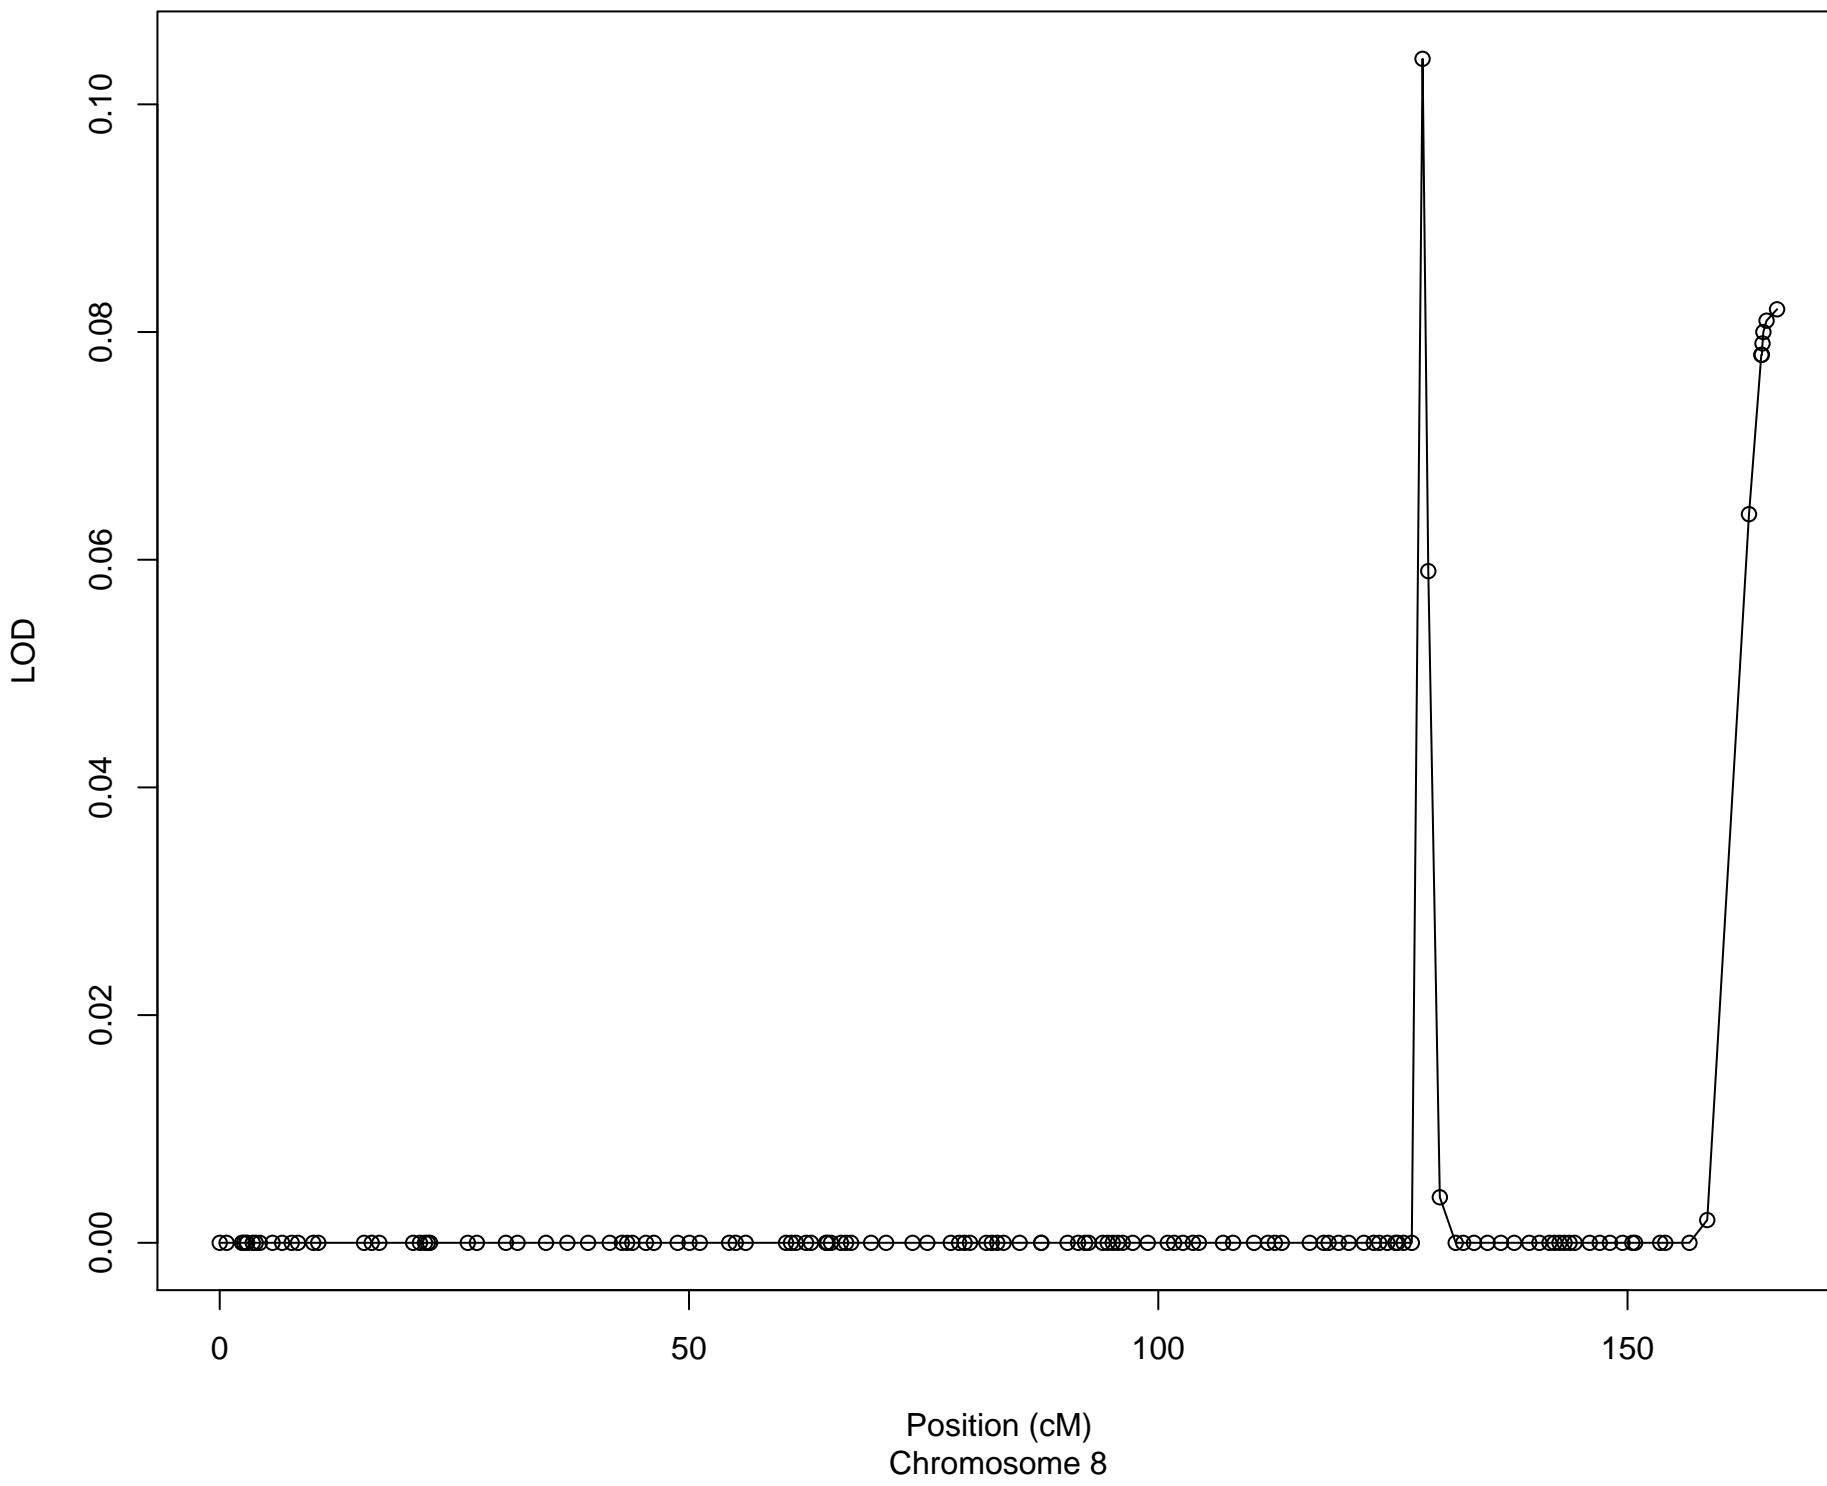



# IC50 (Irinotecan) (IC50\_CPT11)

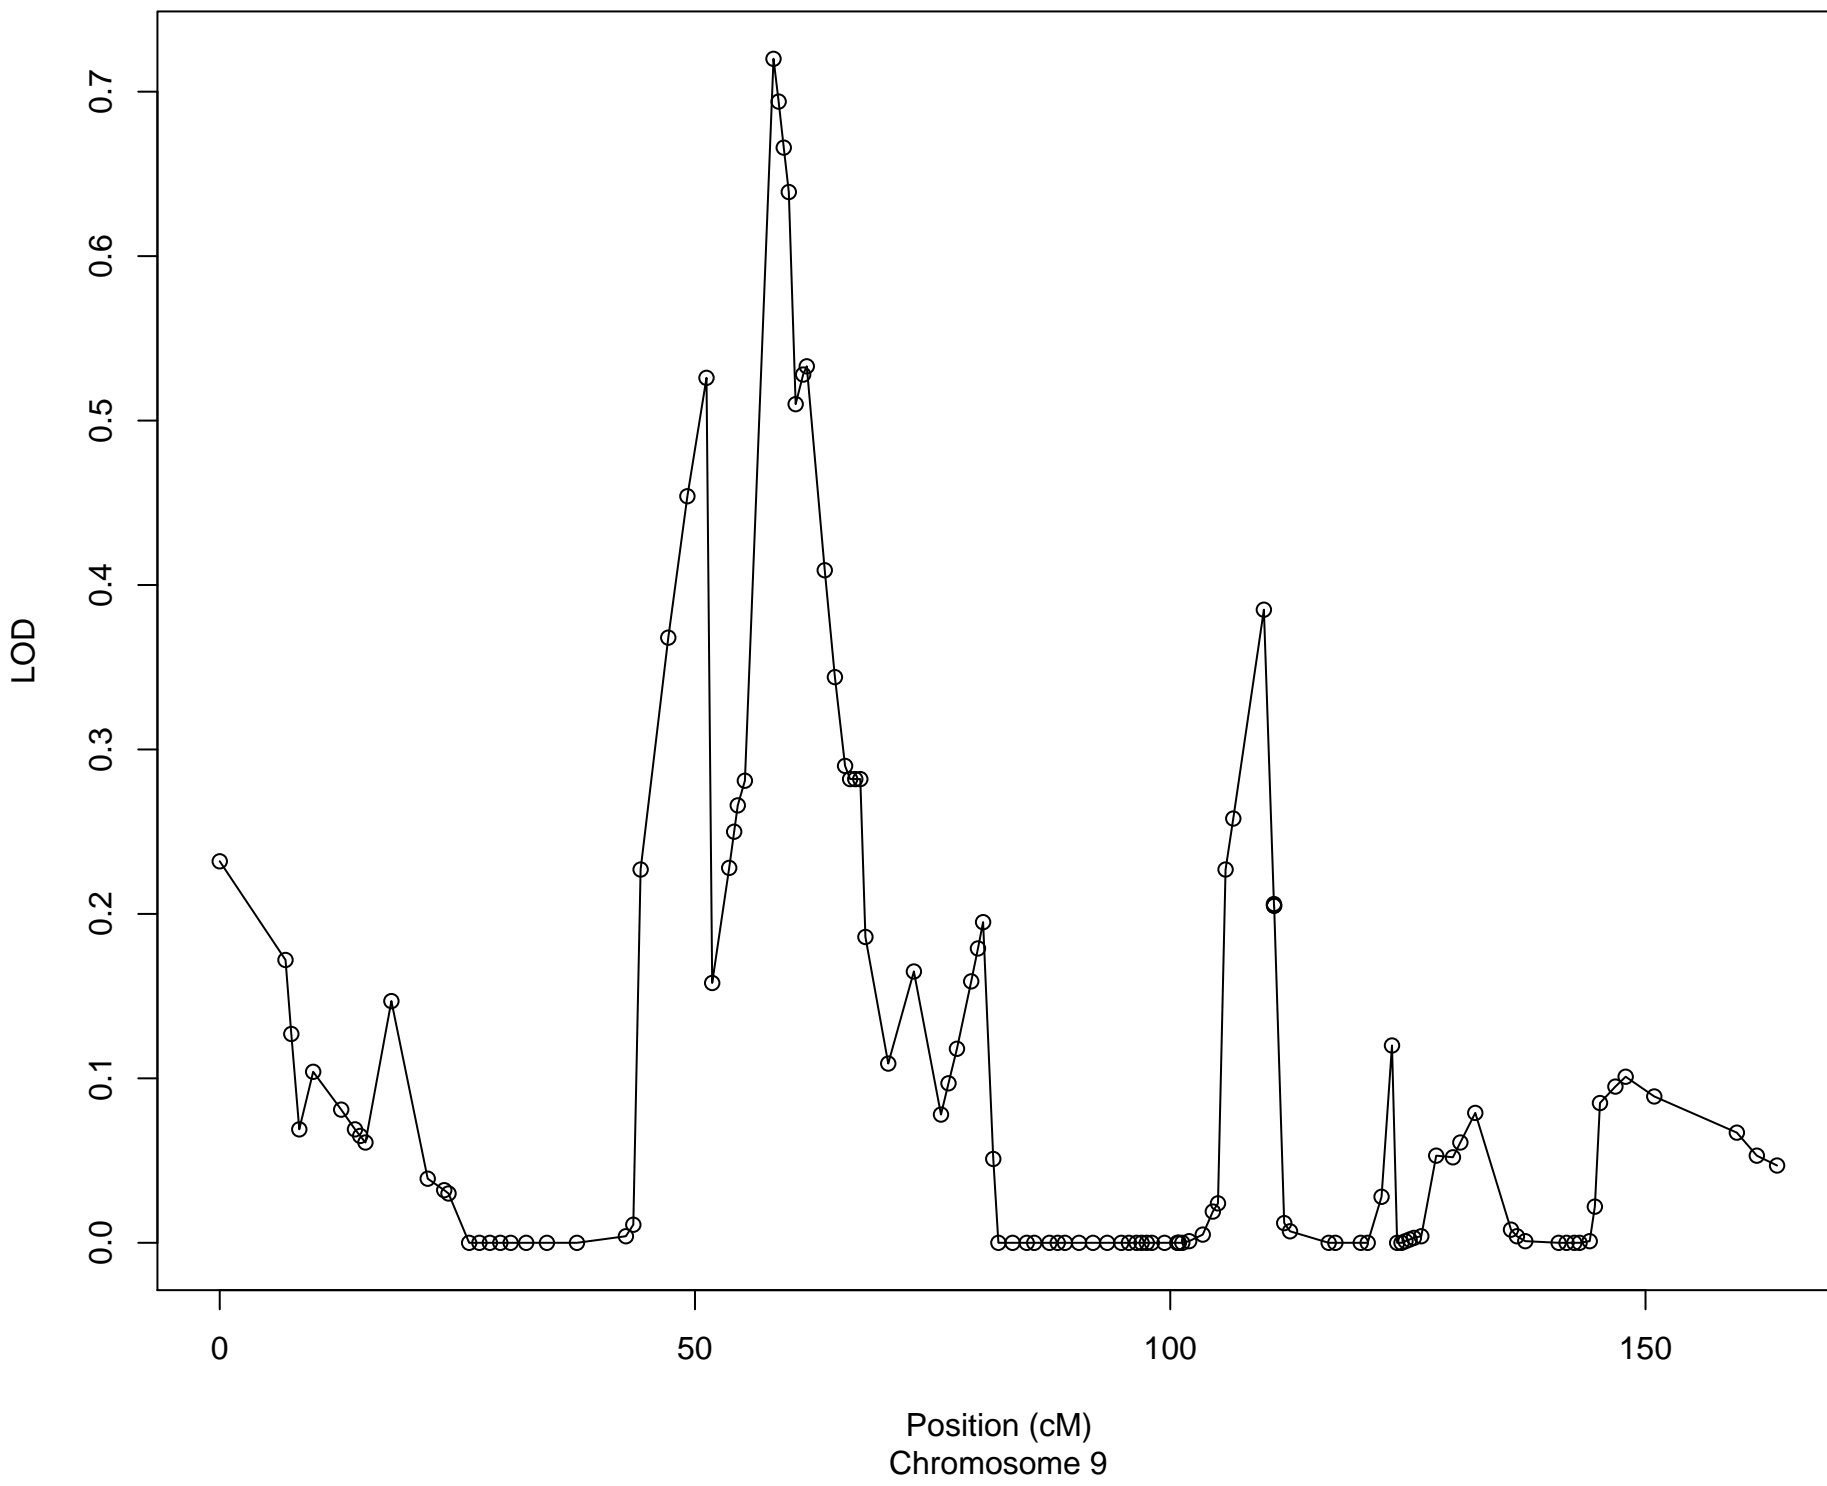

# IC50 (Irinotecan) (IC50\_CPT11)

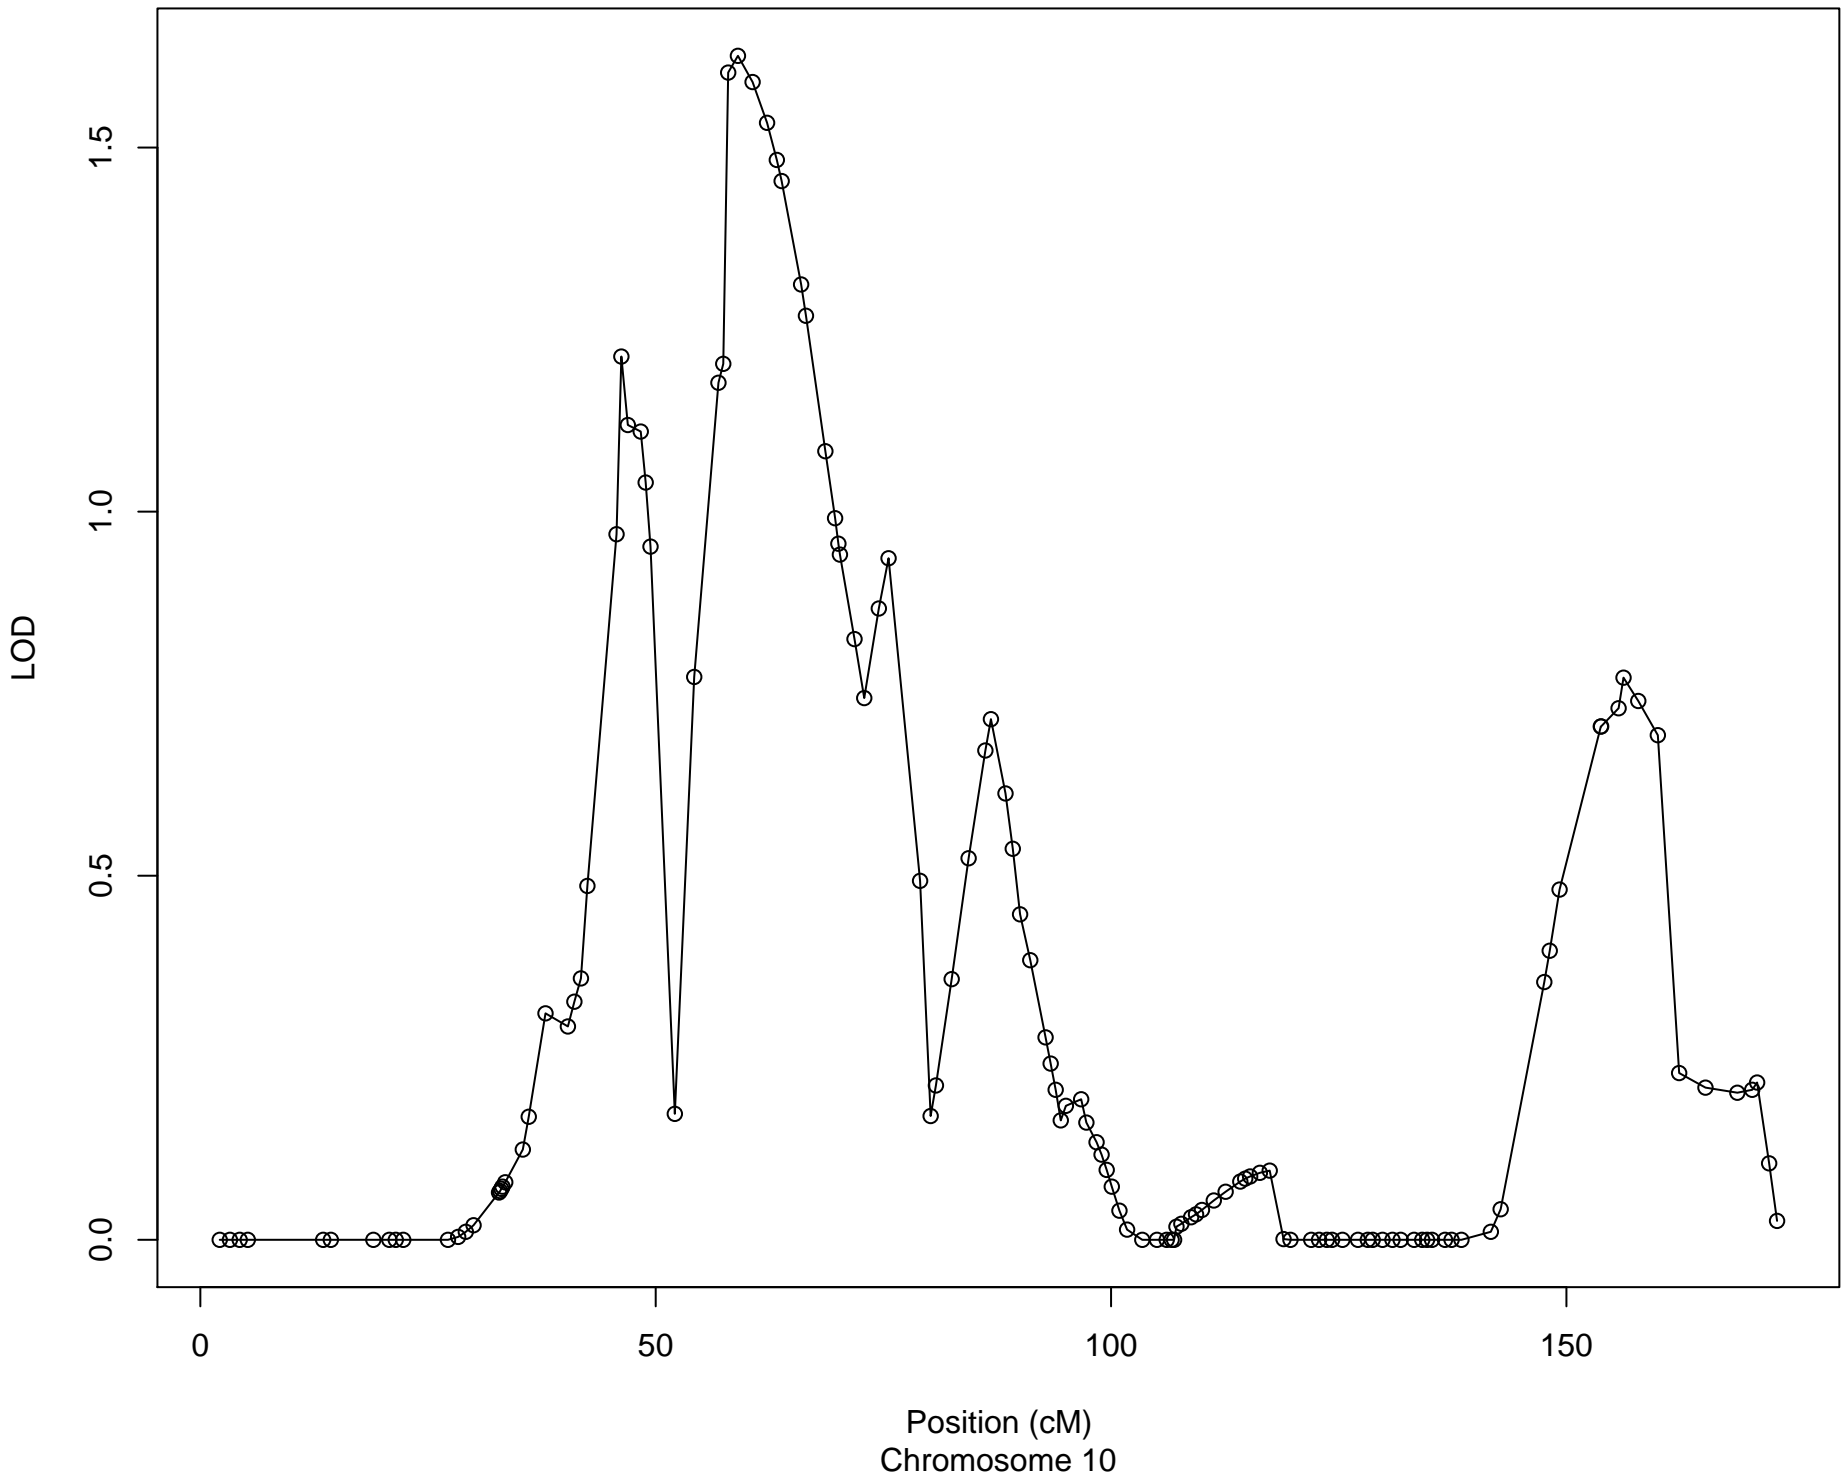

# IC50 (Irinotecan) (IC50\_CPT11)

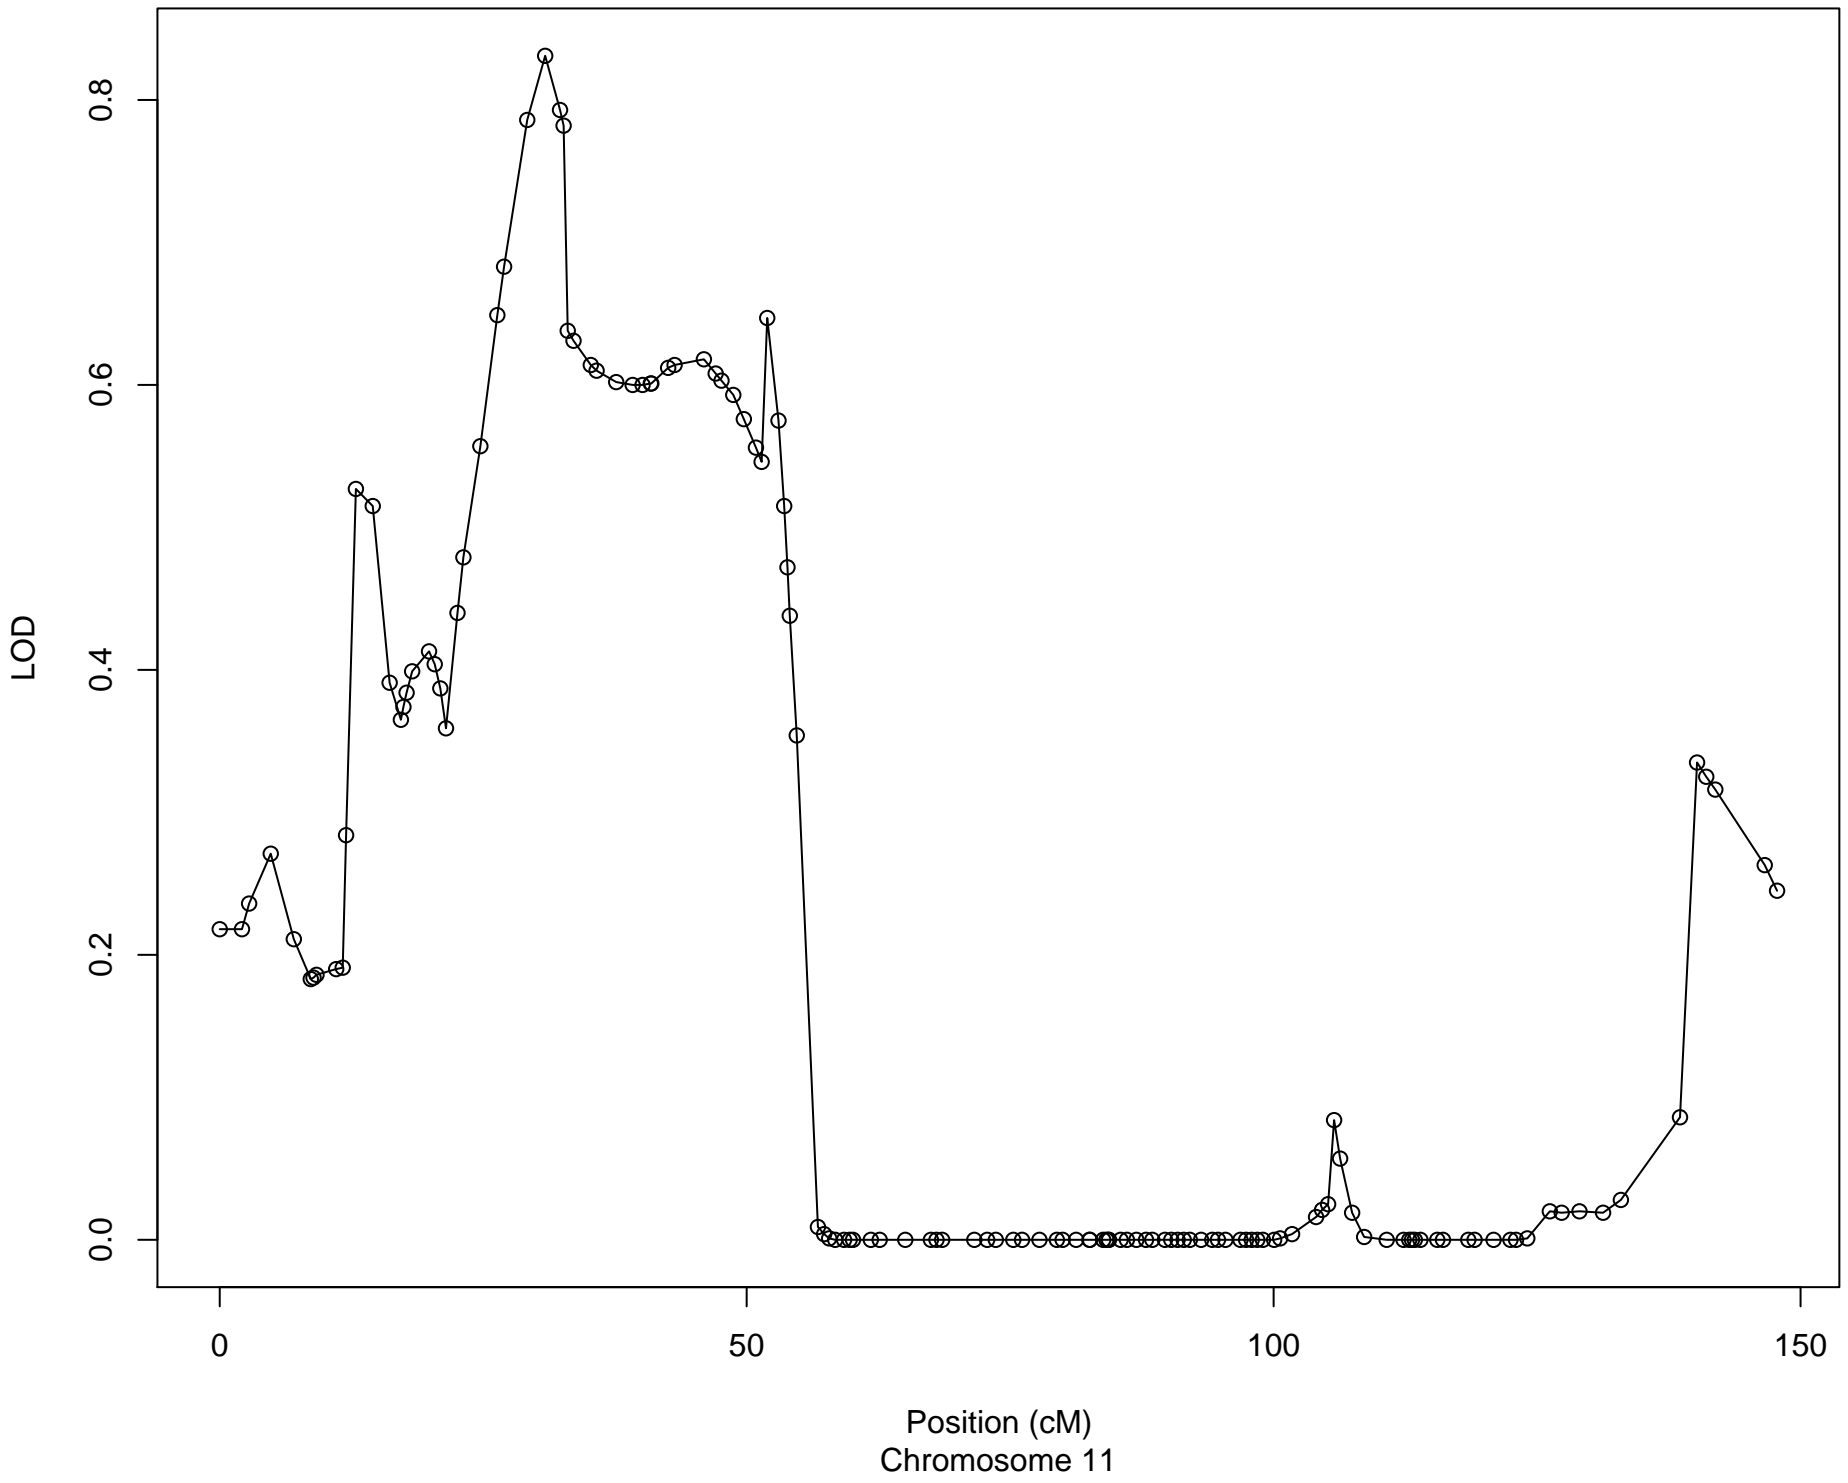

# IC50 (Irinotecan) (IC50\_CPT11)

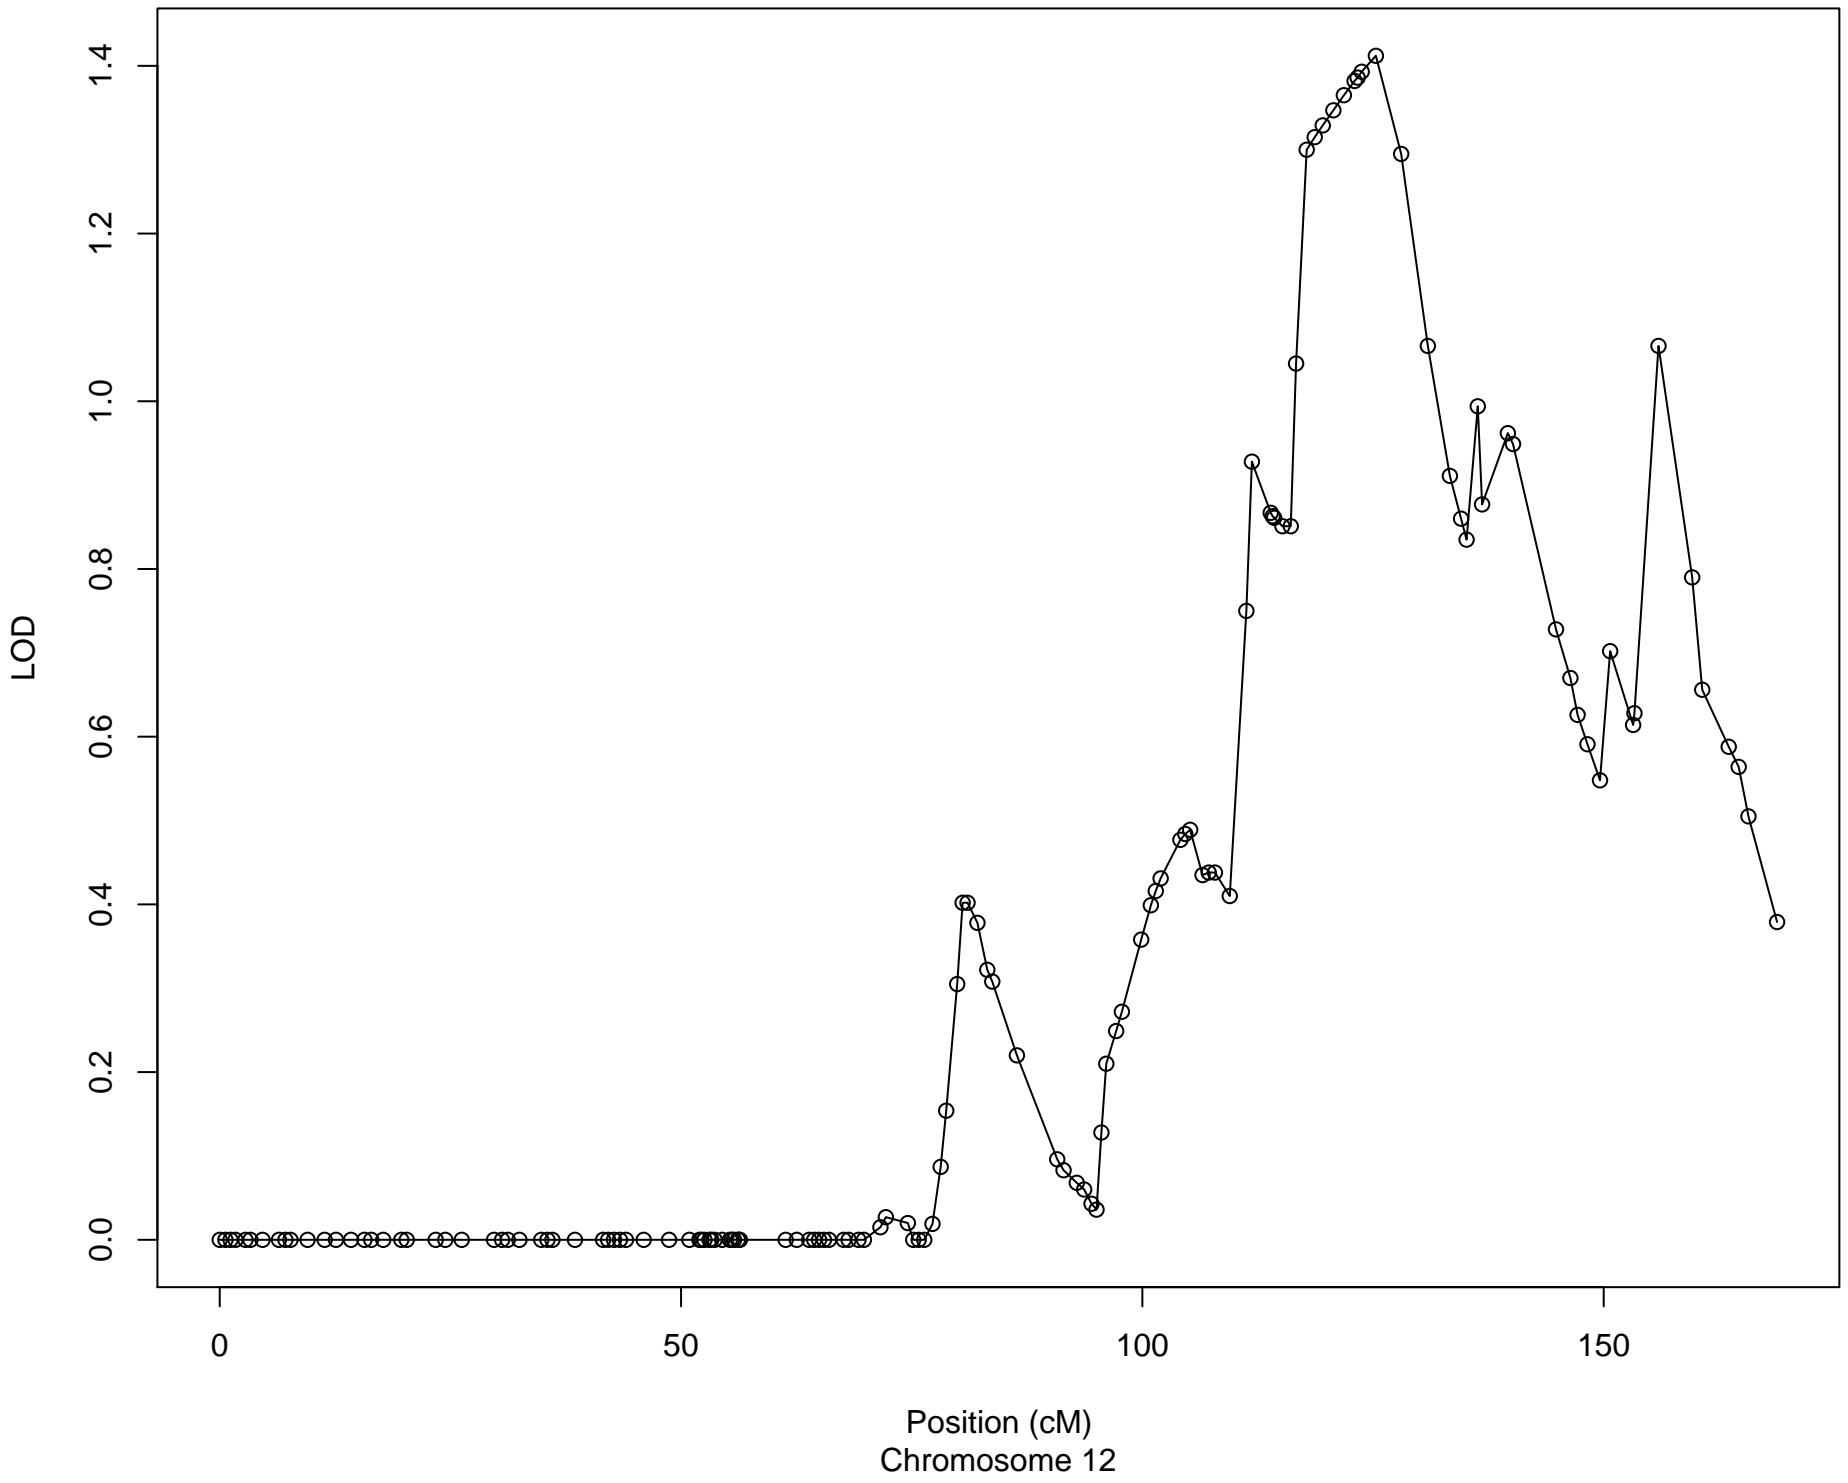

# IC50 (Irinotecan) (IC50\_CPT11)

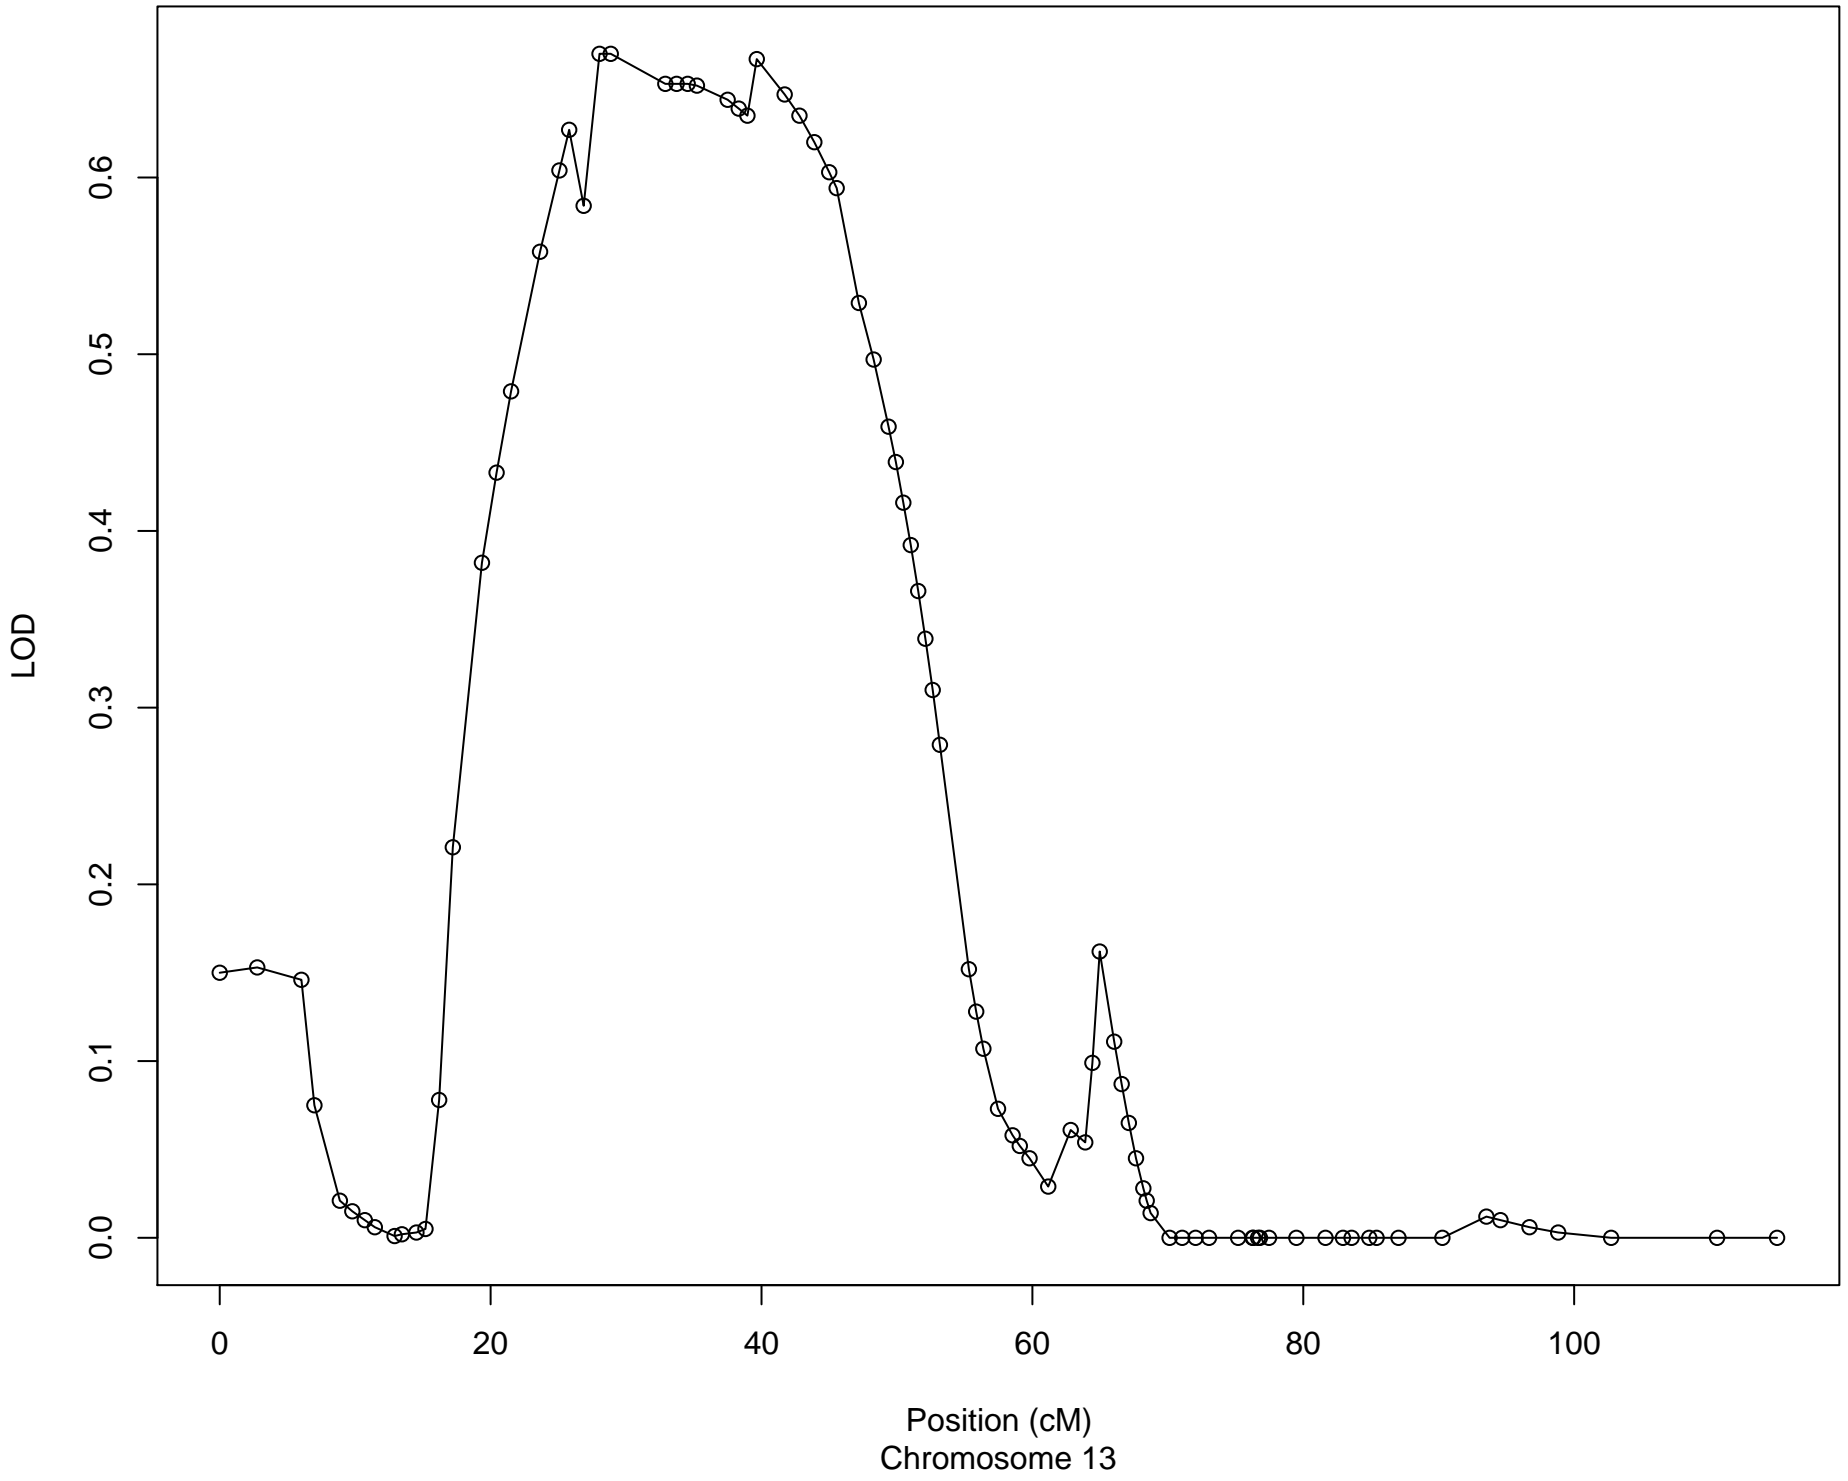

# IC50 (Irinotecan) (IC50\_CPT11)

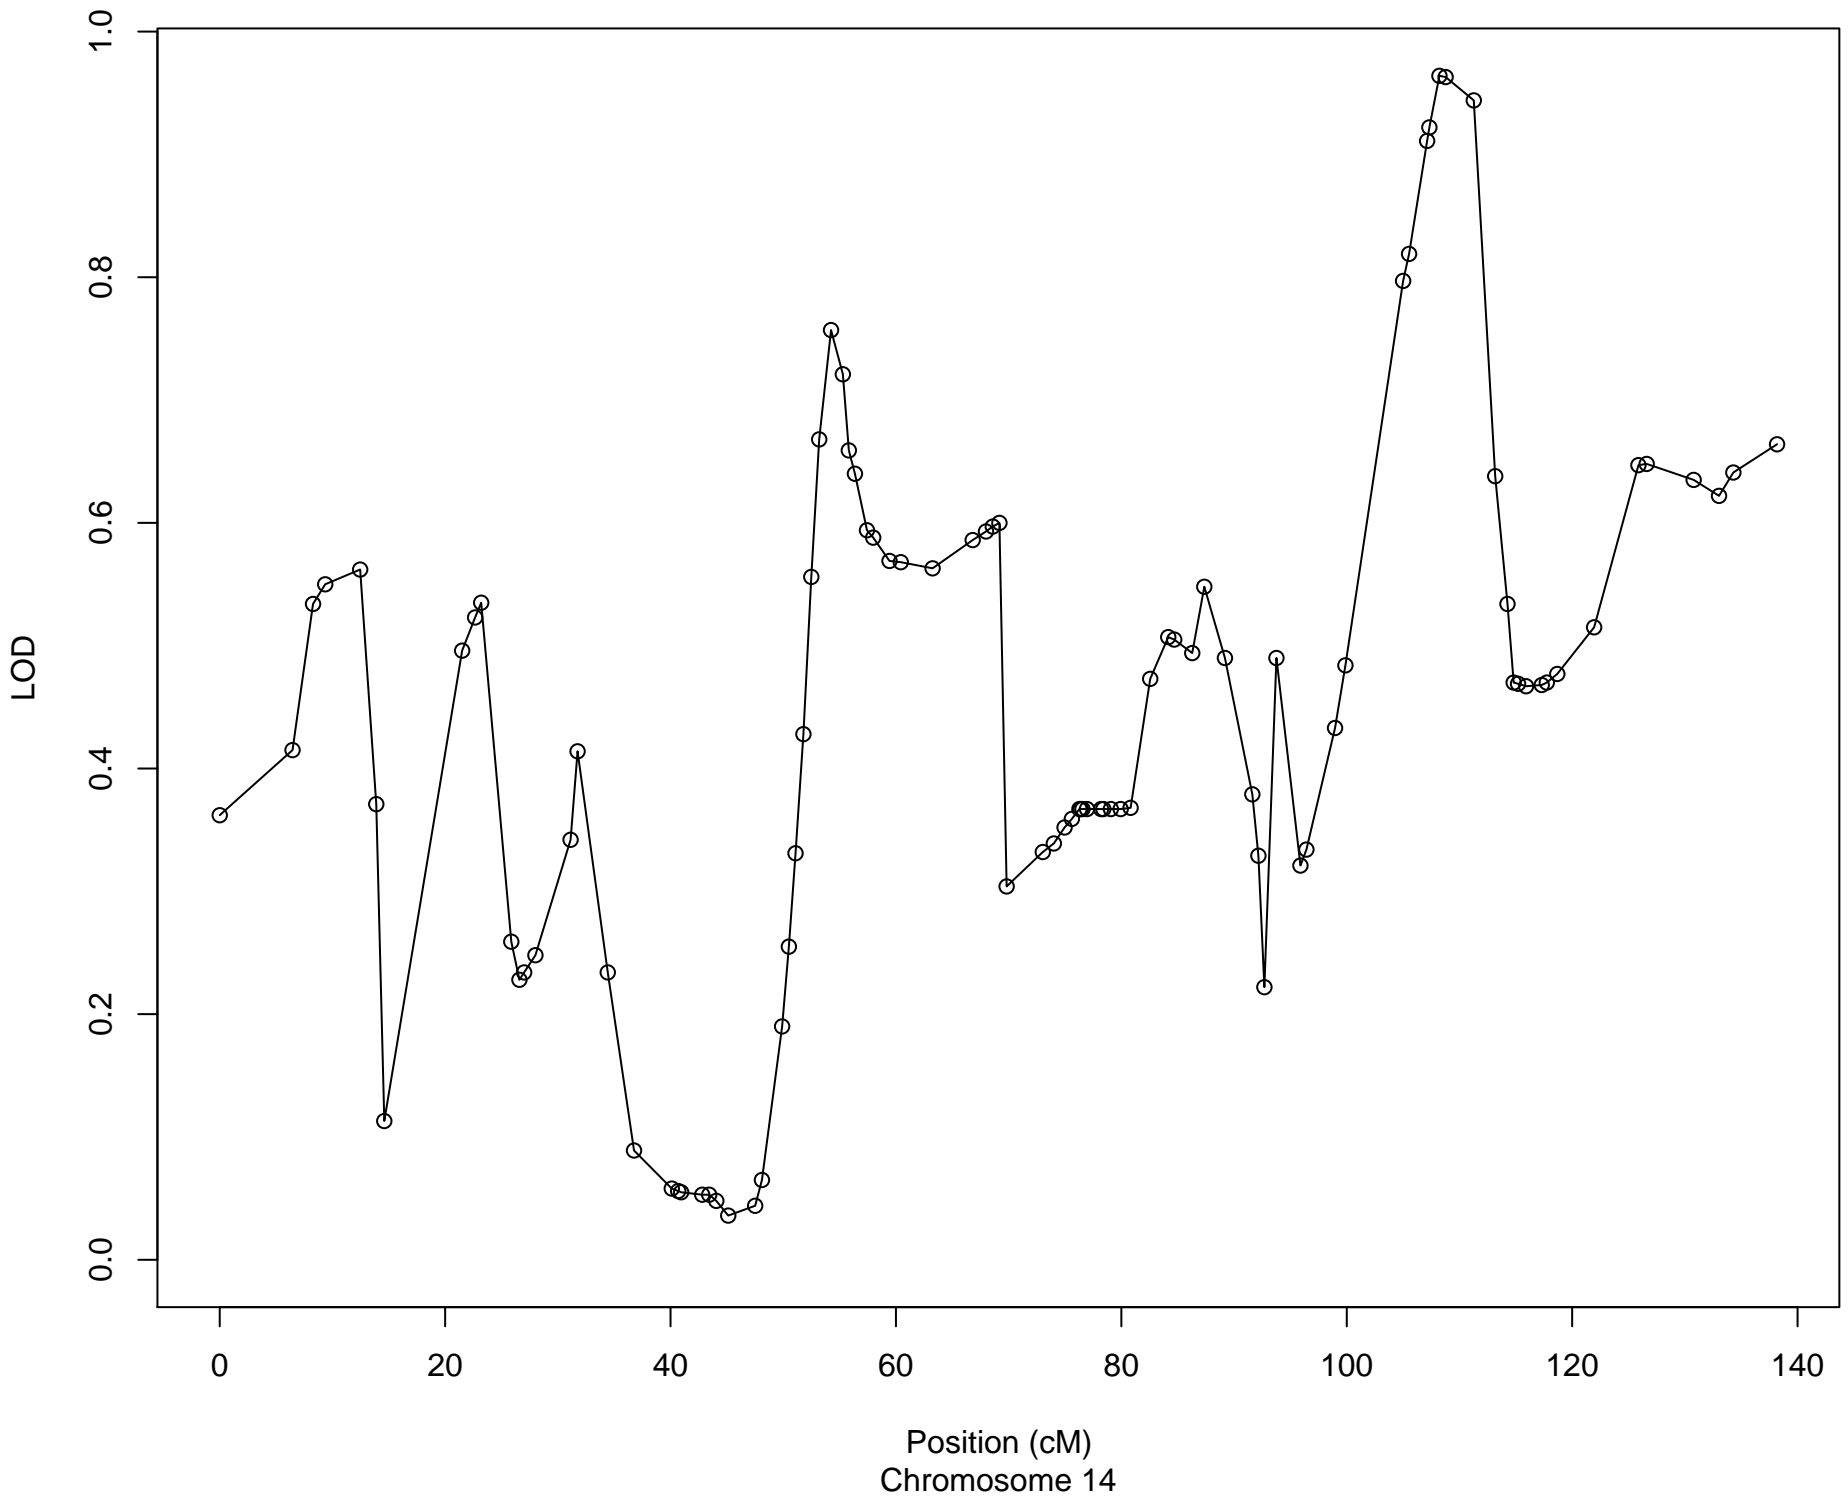

# IC50 (Irinotecan) (IC50\_CPT11)

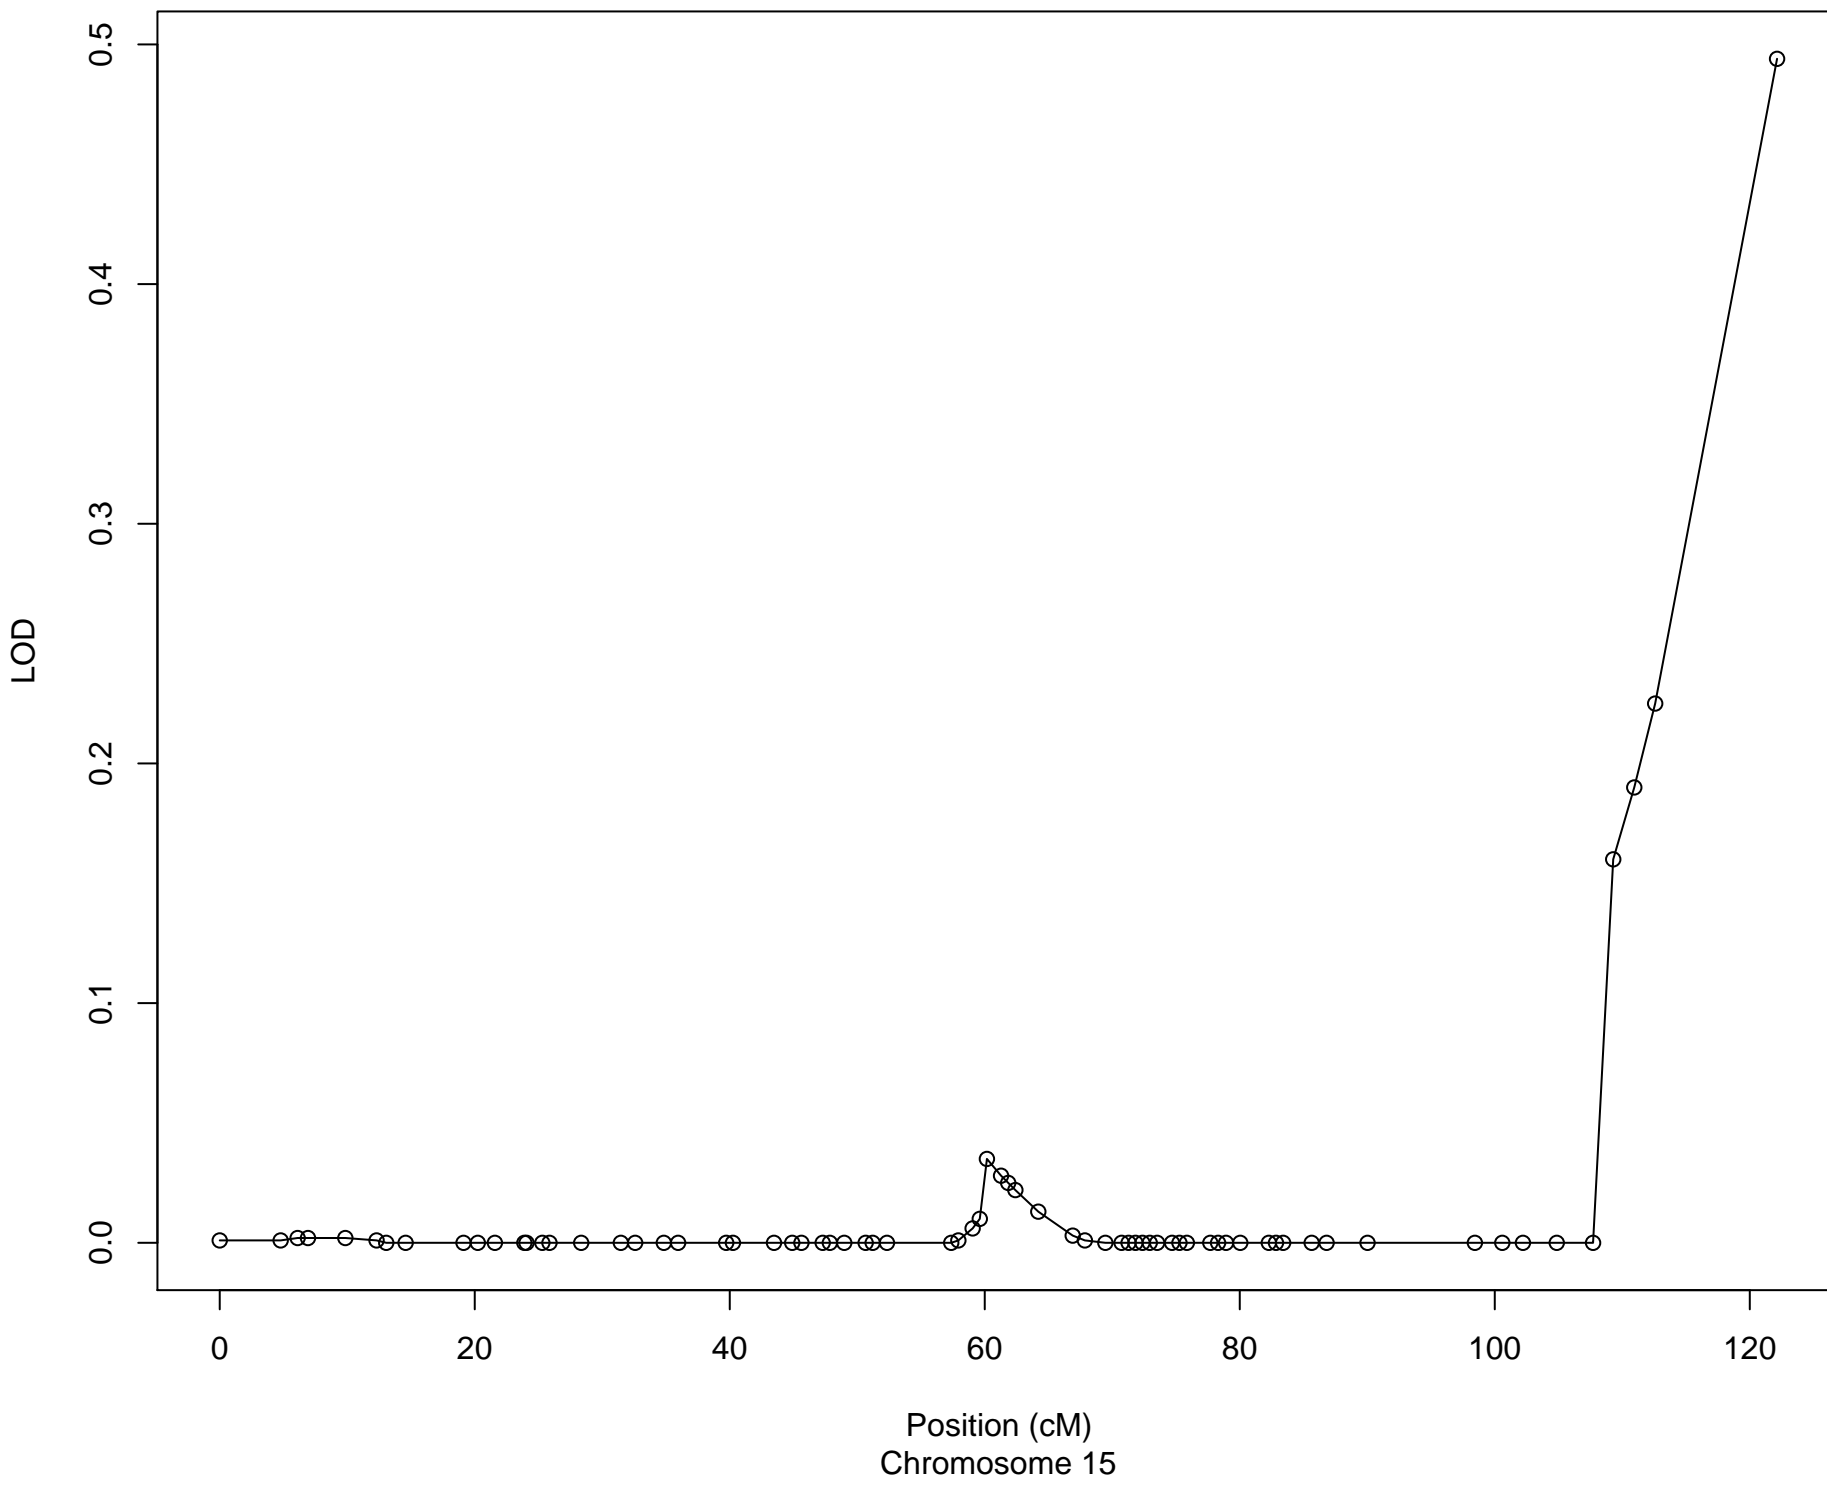

# IC50 (Irinotecan) (IC50\_CPT11)

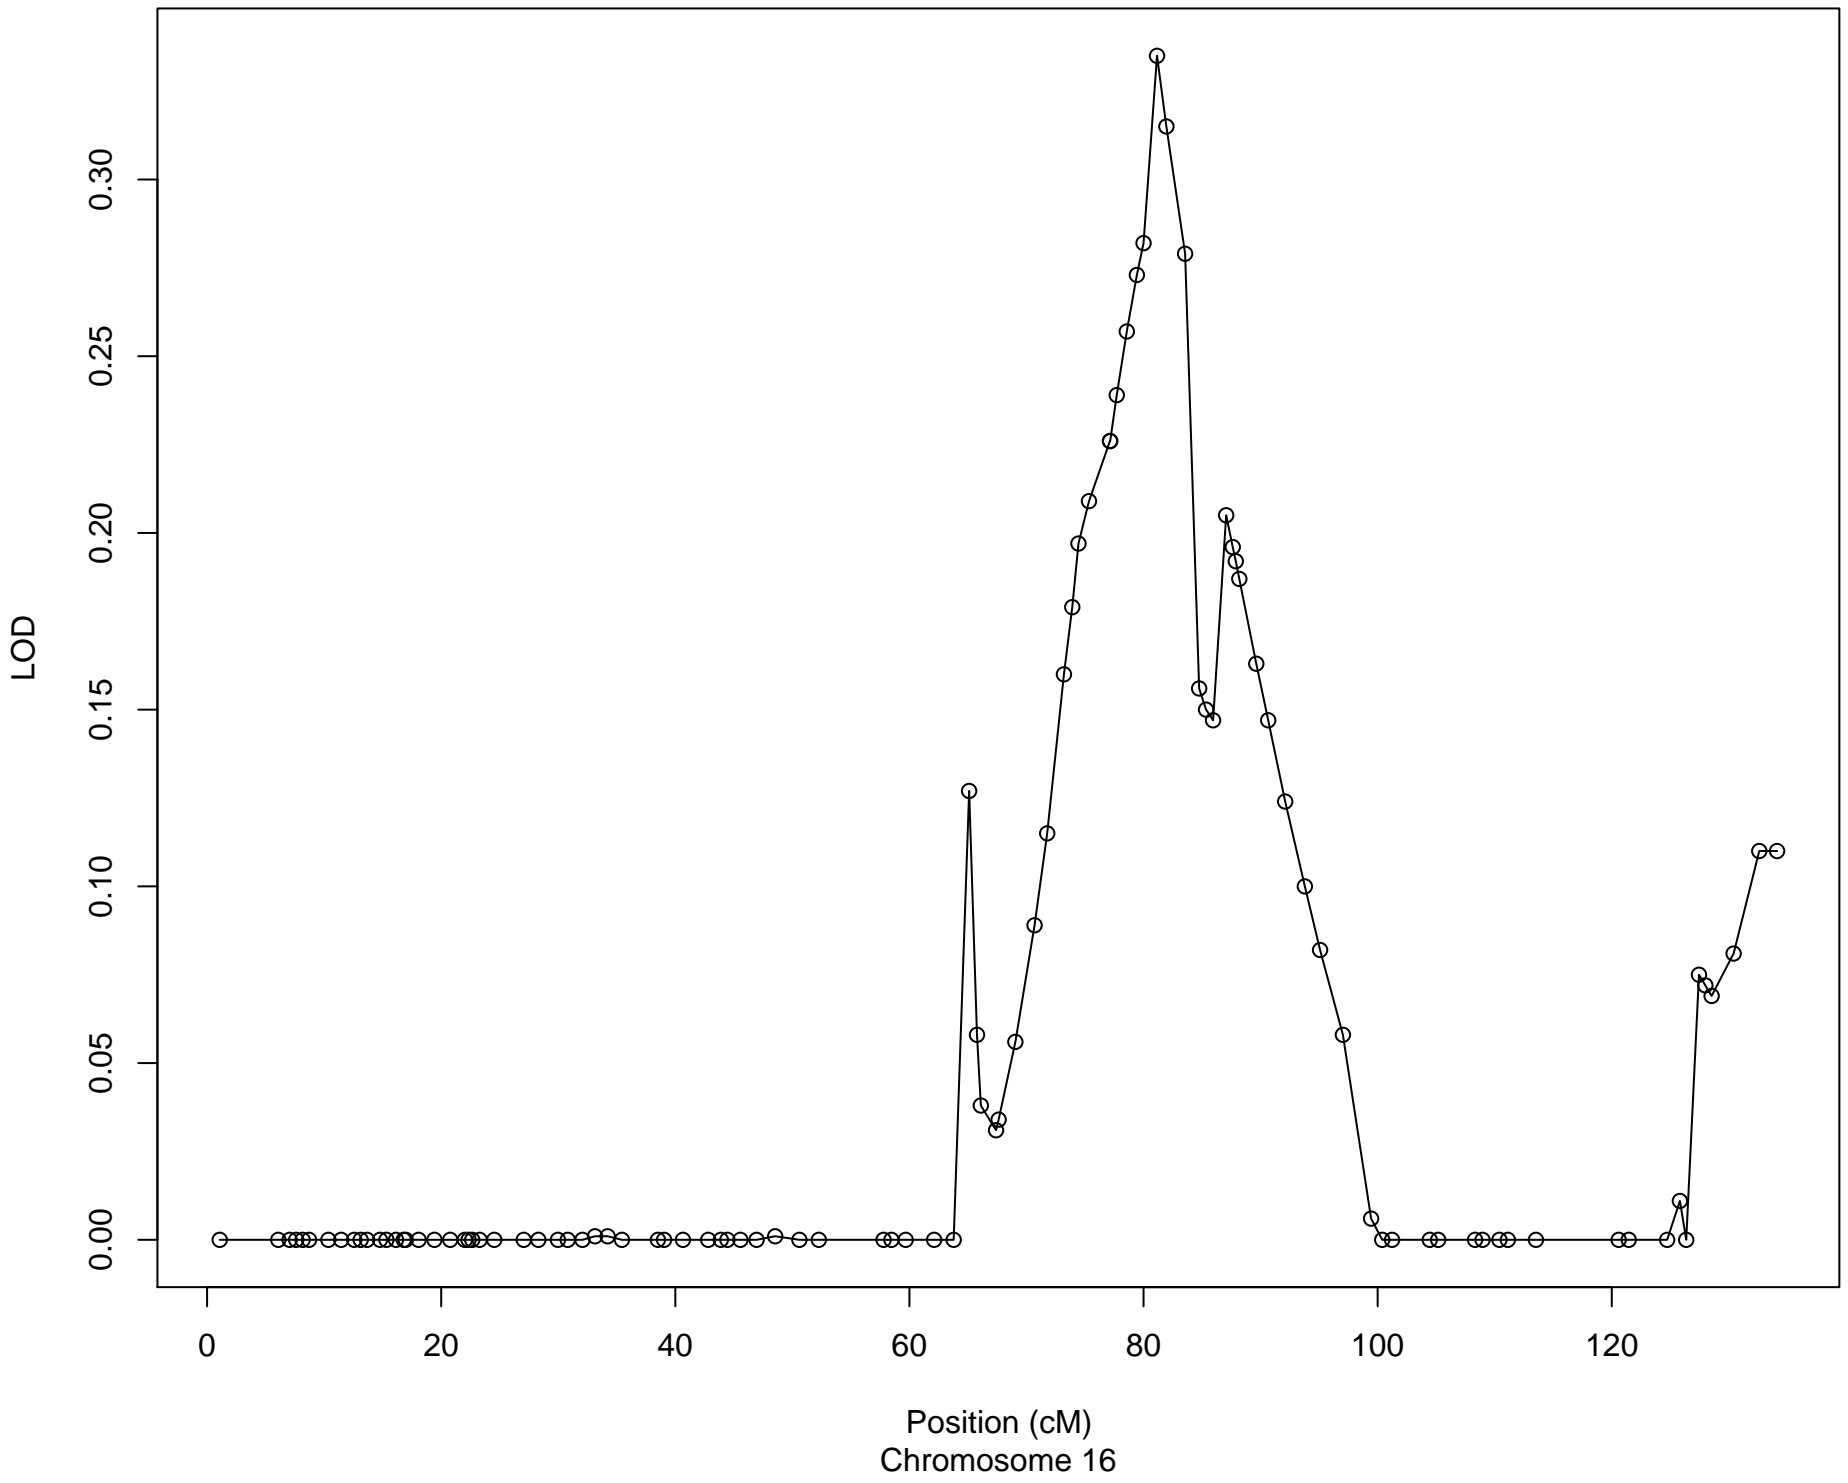



# IC50 (Irinotecan) (IC50\_CPT11)

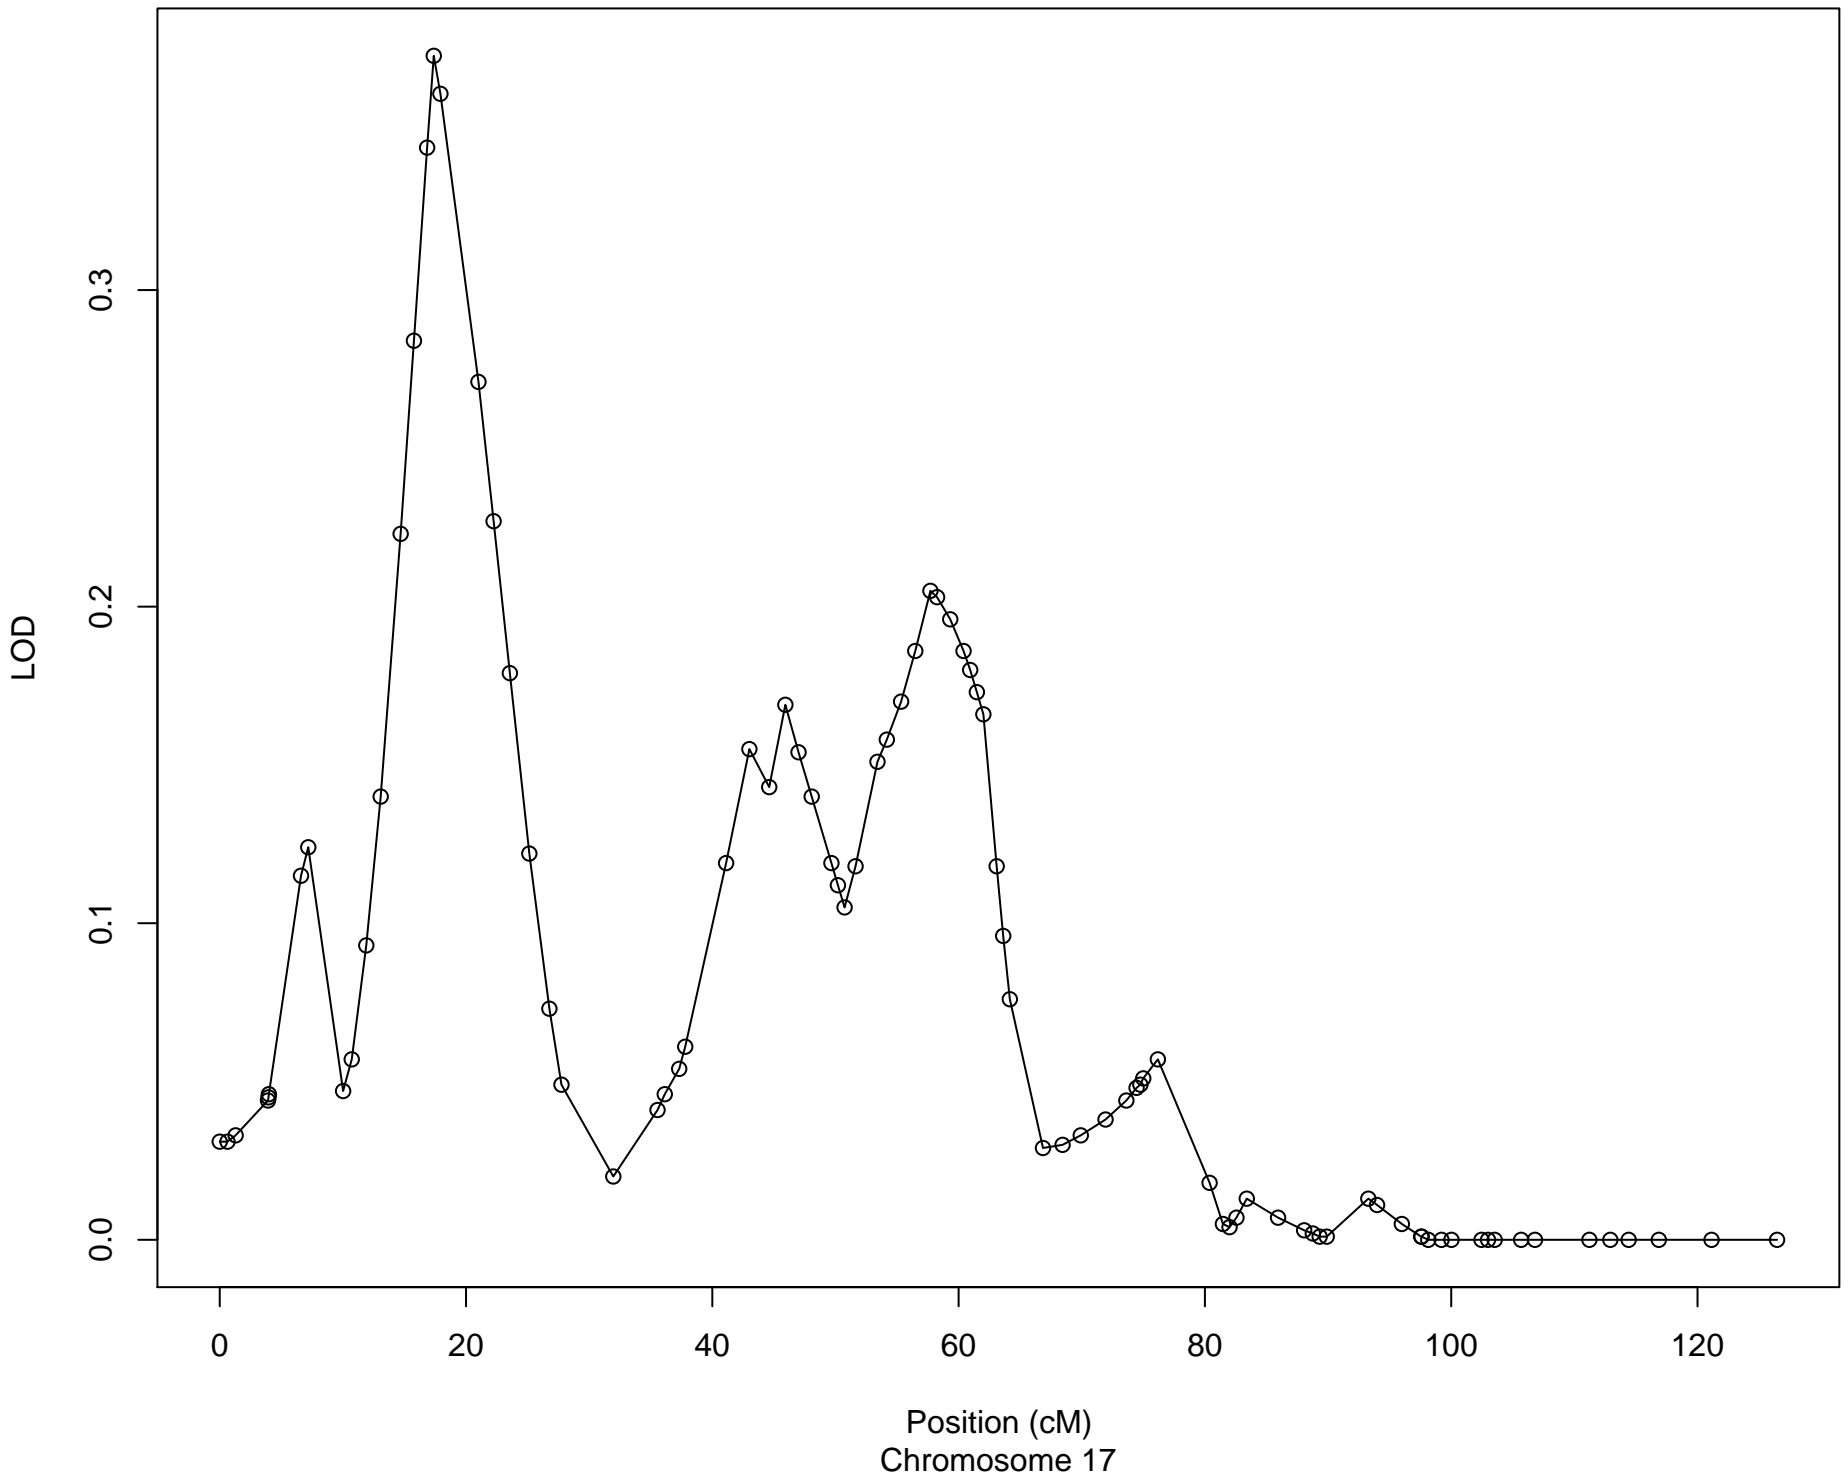

# IC50 (Irinotecan) (IC50\_CPT11)

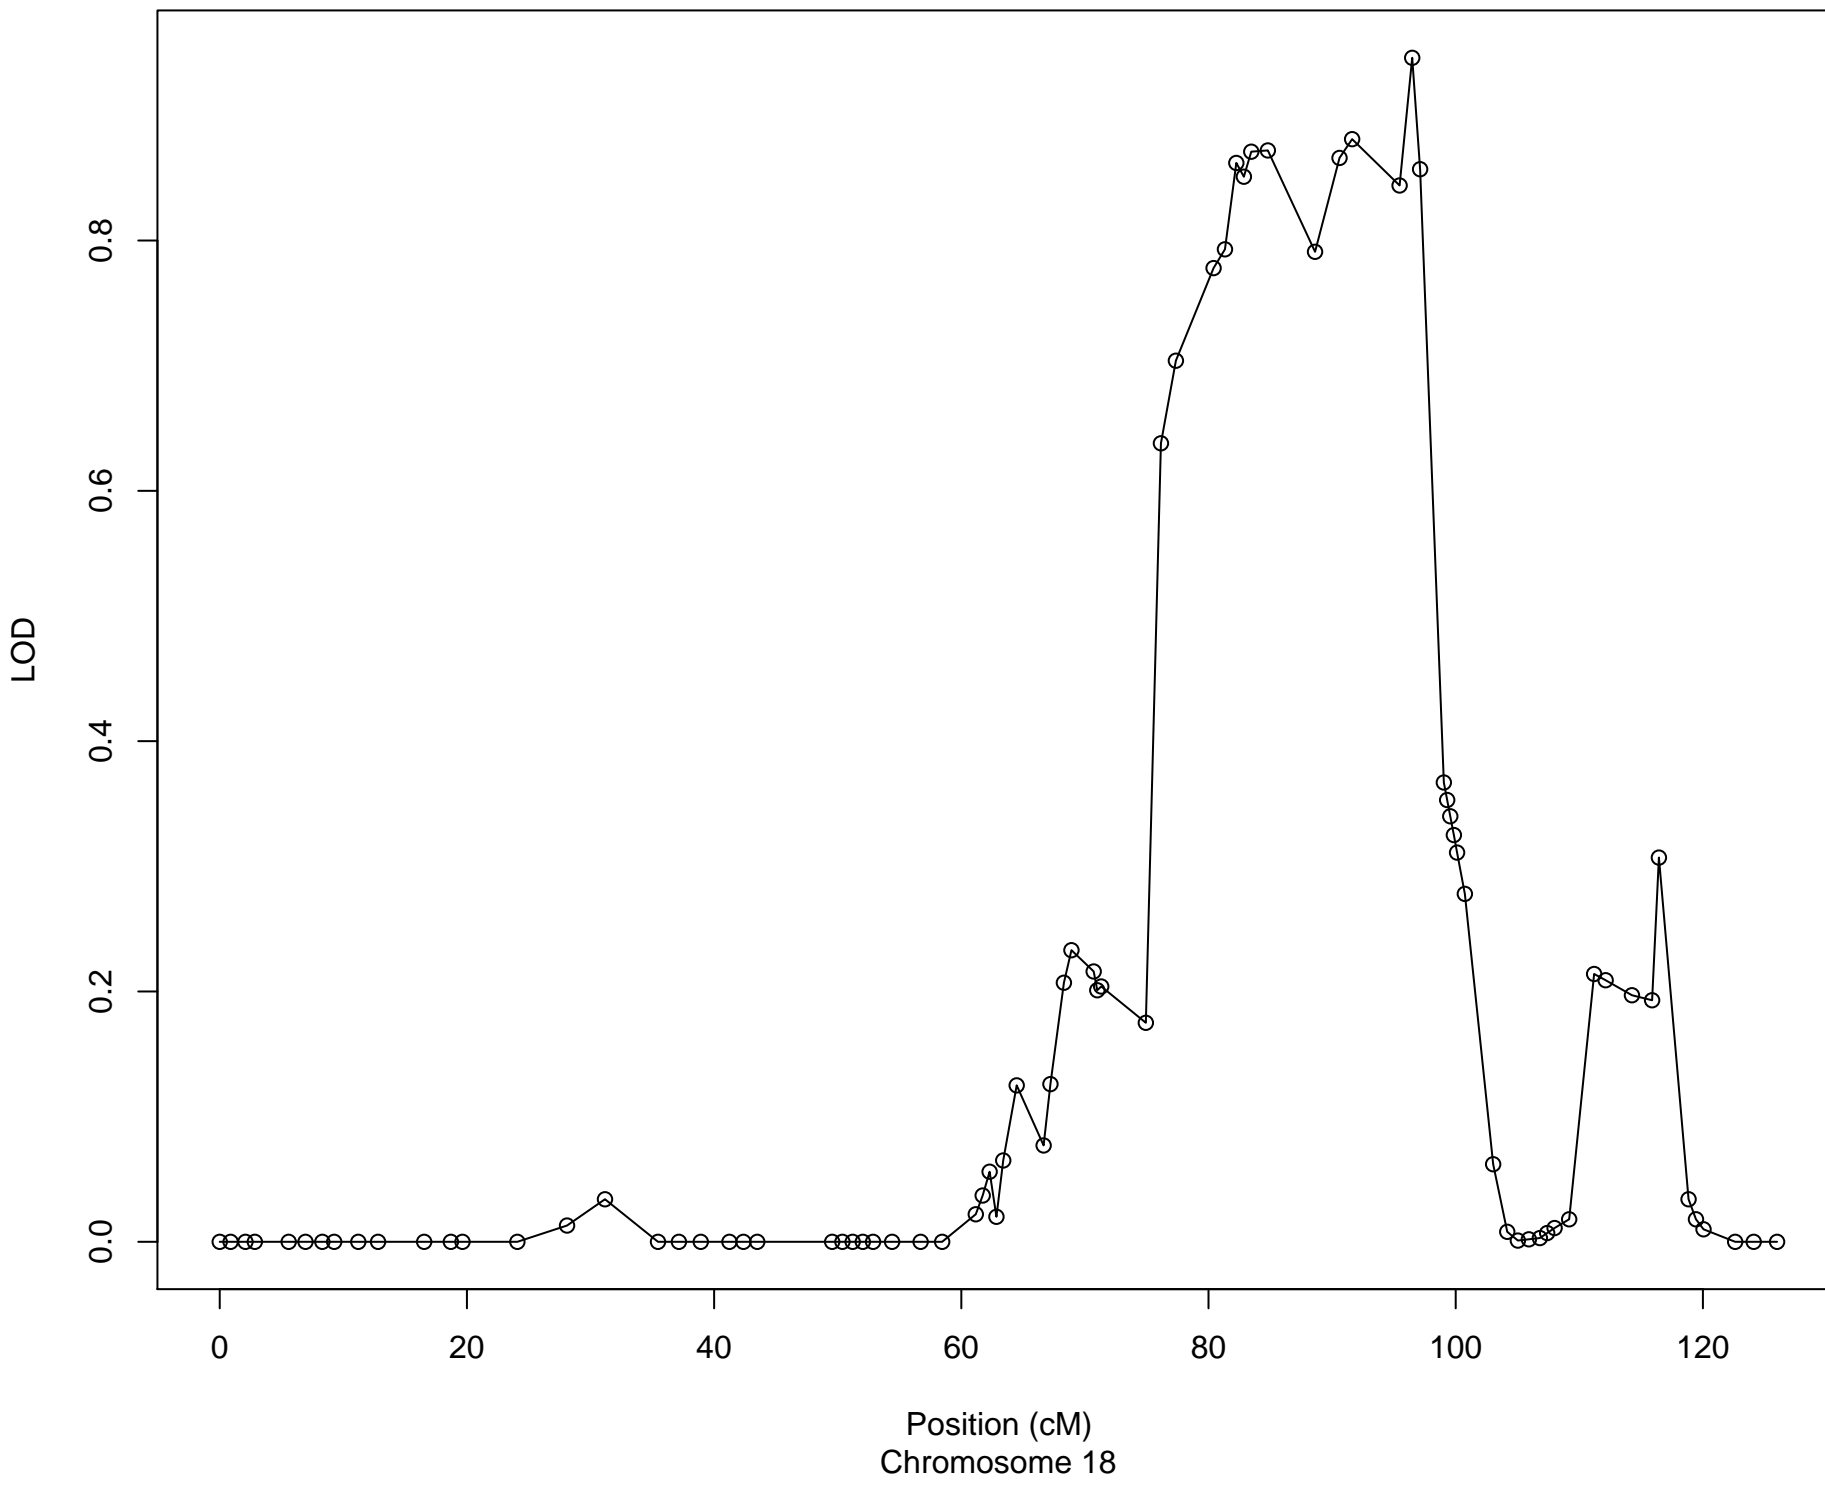

# IC50 (Irinotecan) (IC50\_CPT11)

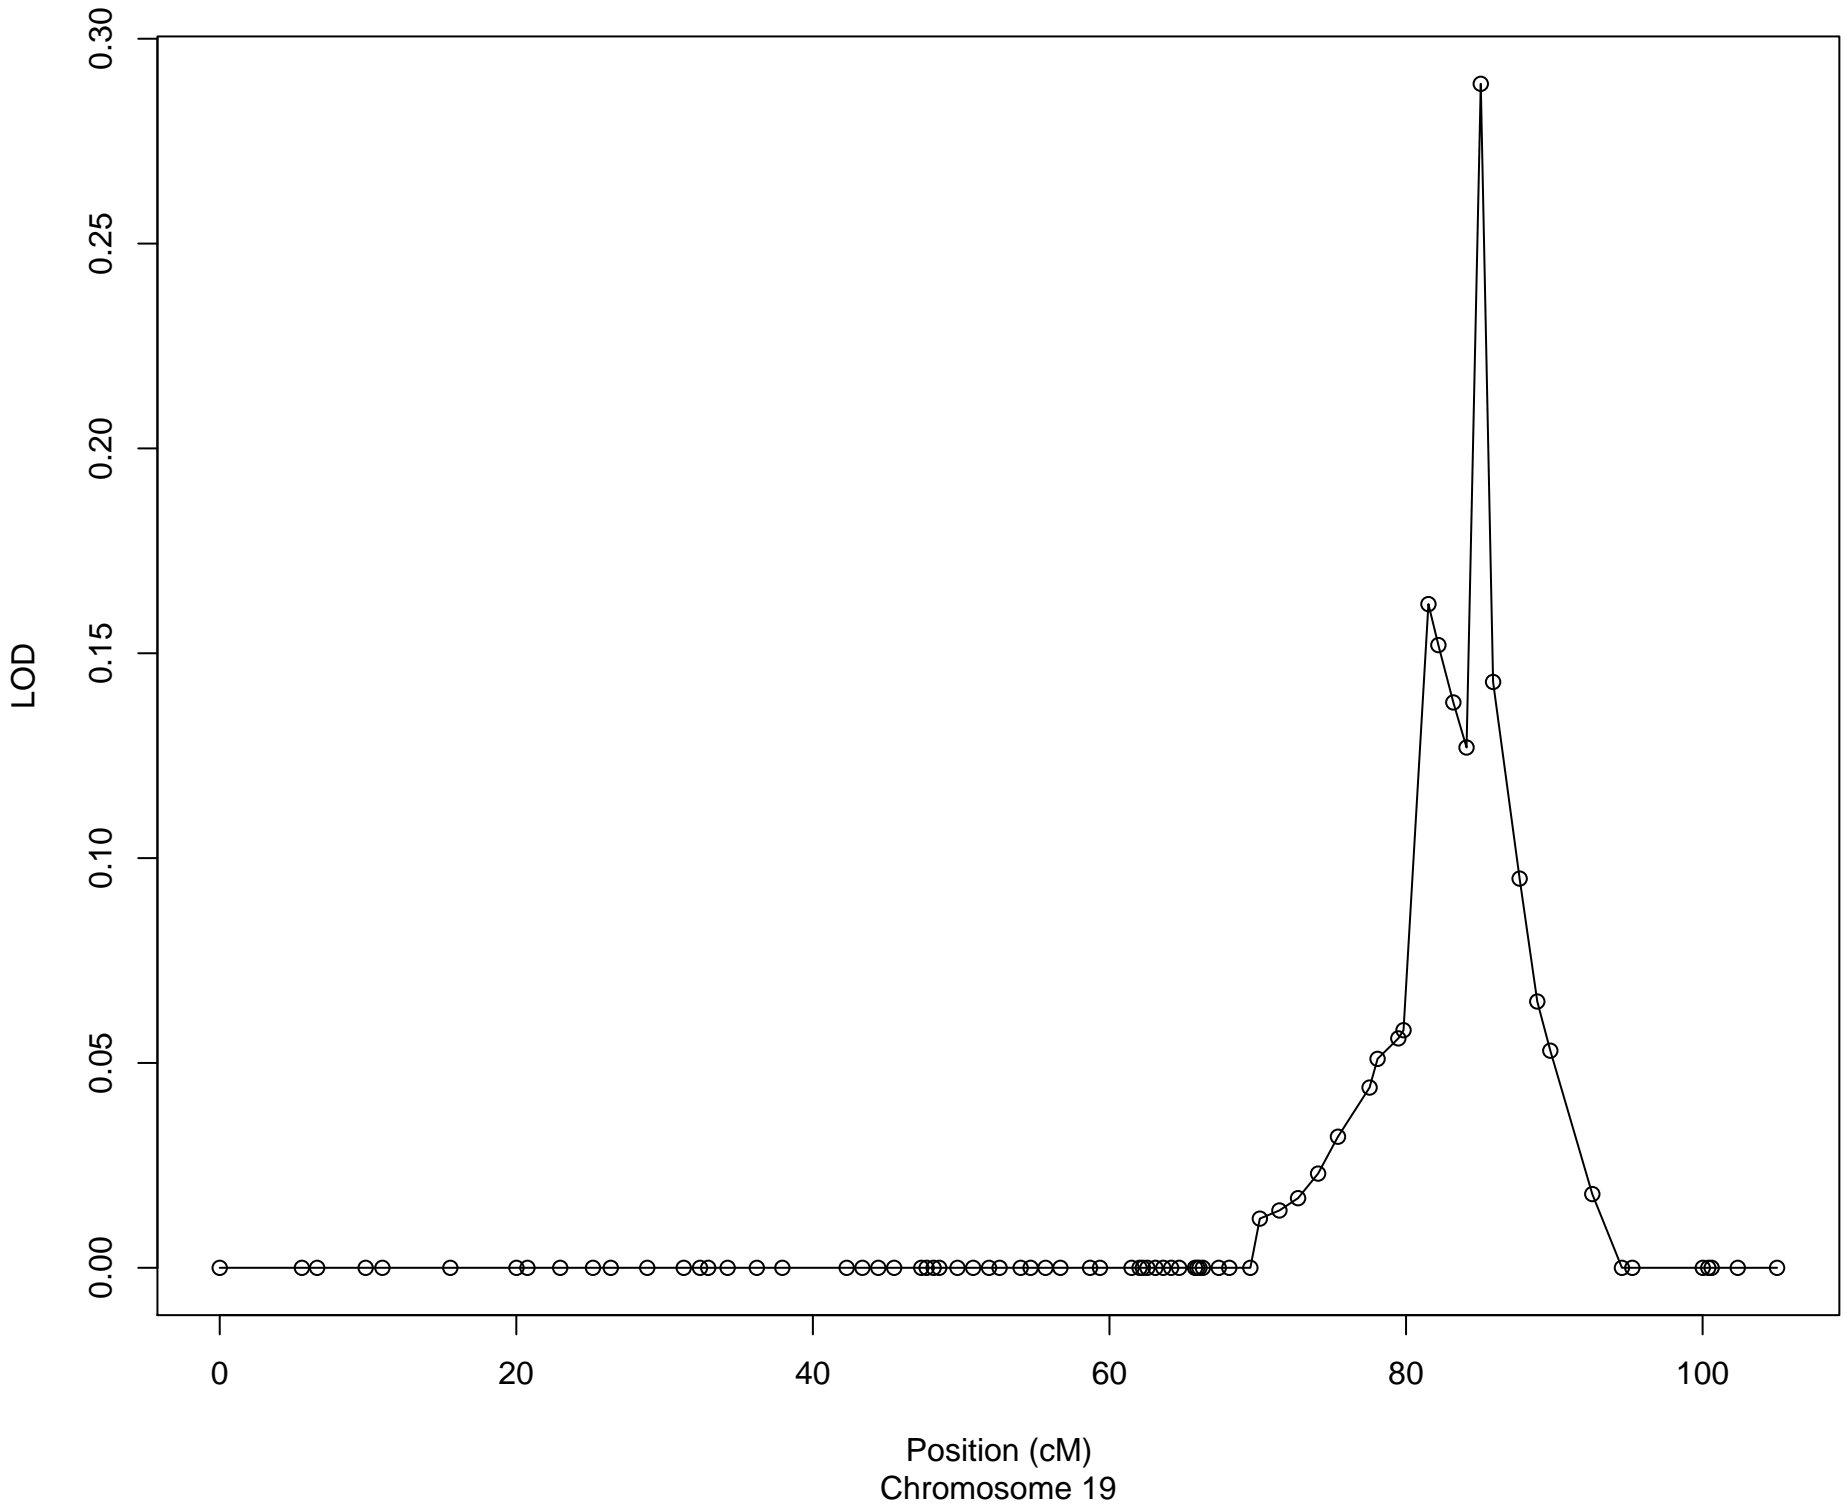

# IC50 (Irinotecan) (IC50\_CPT11)

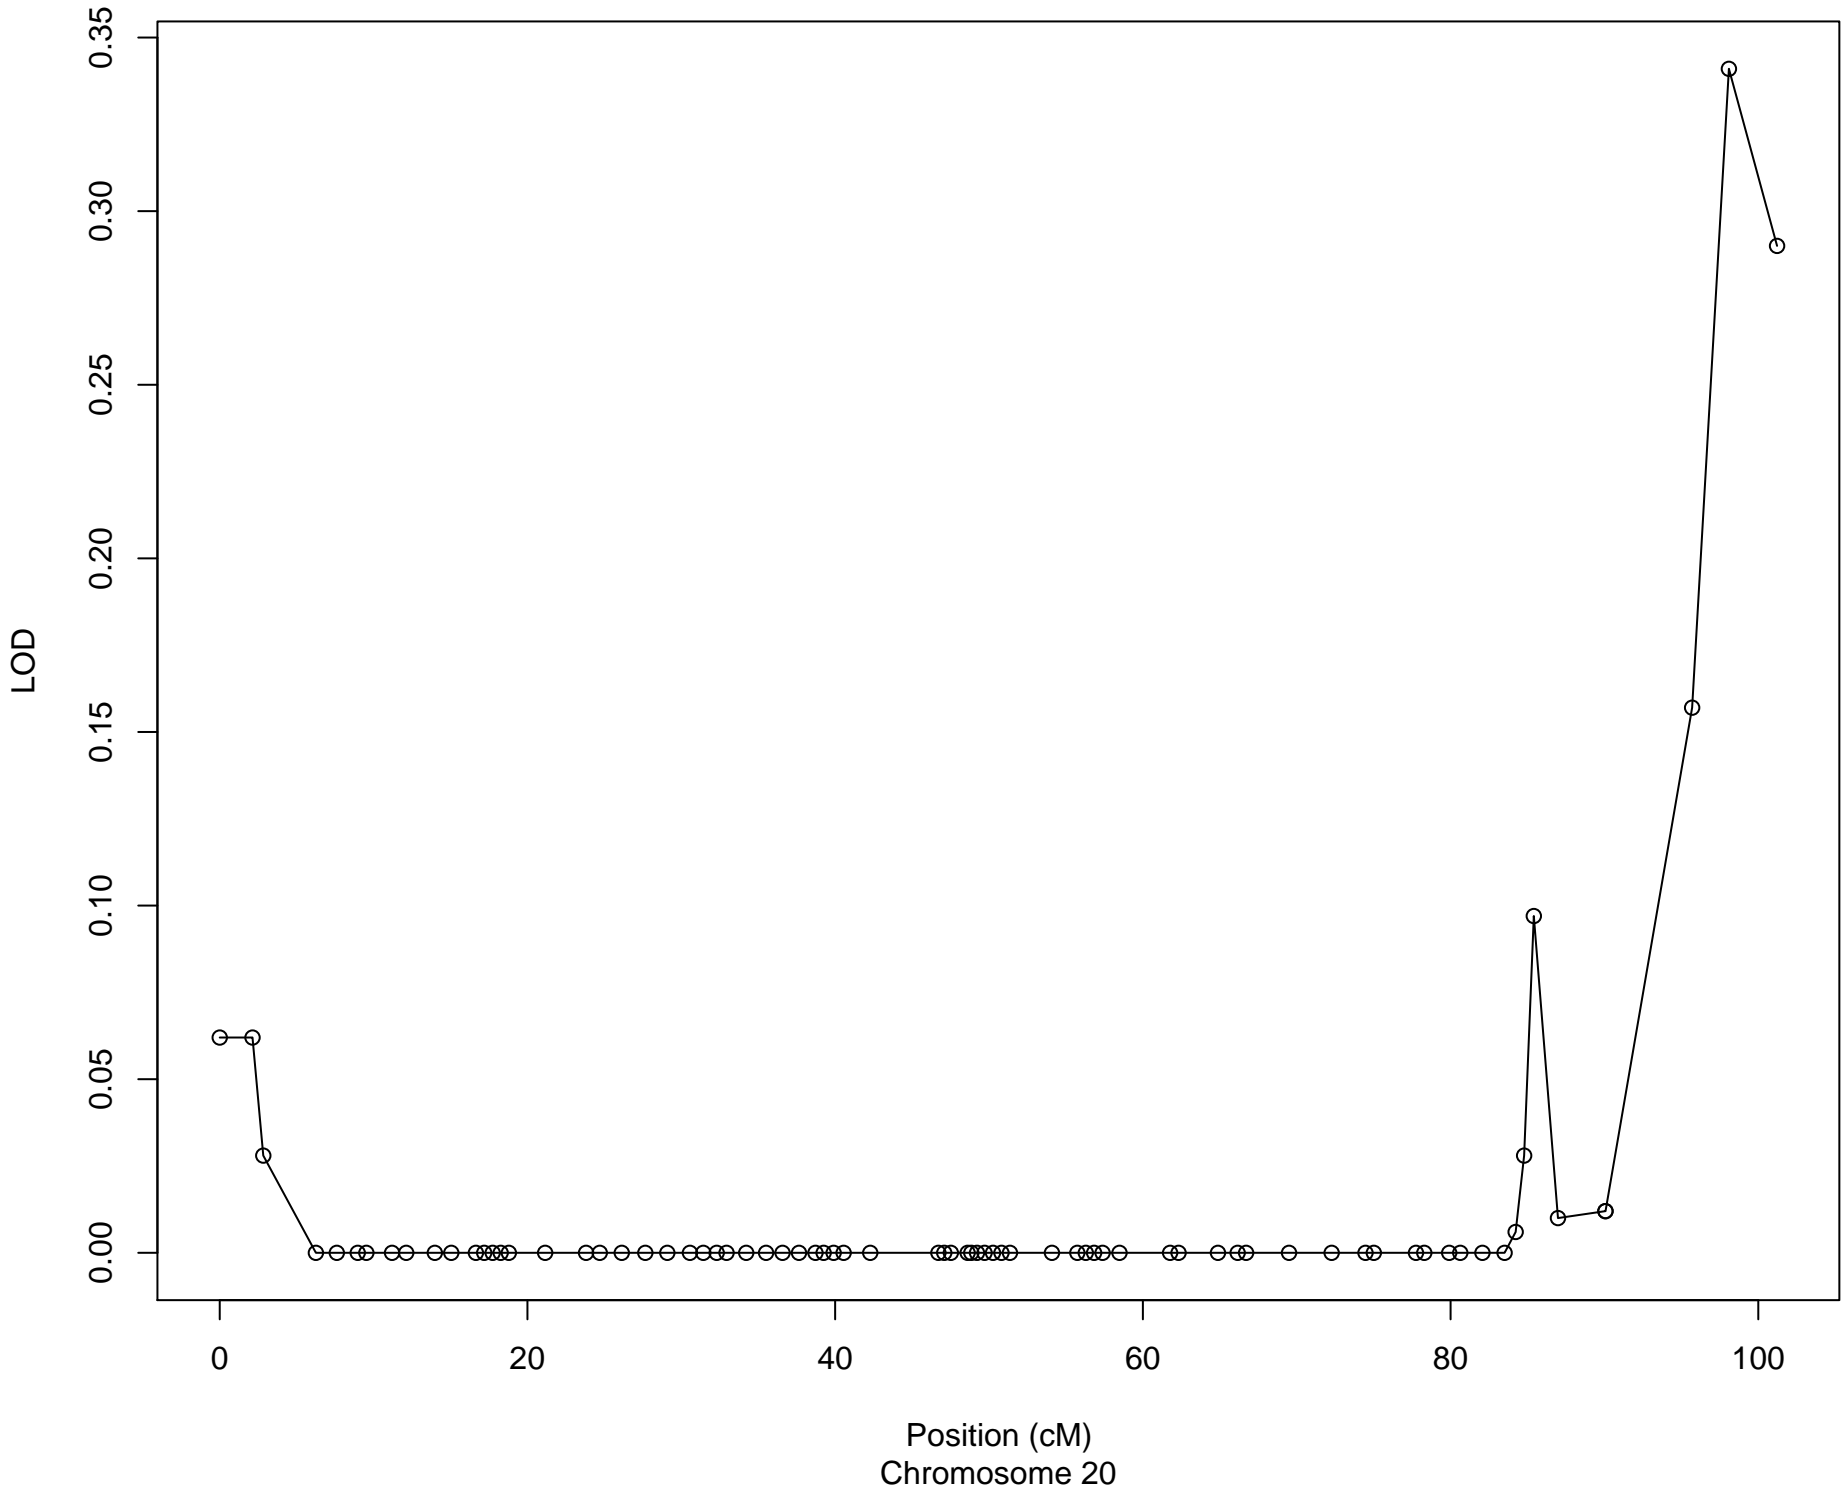

# IC50 (Irinotecan) (IC50\_CPT11)

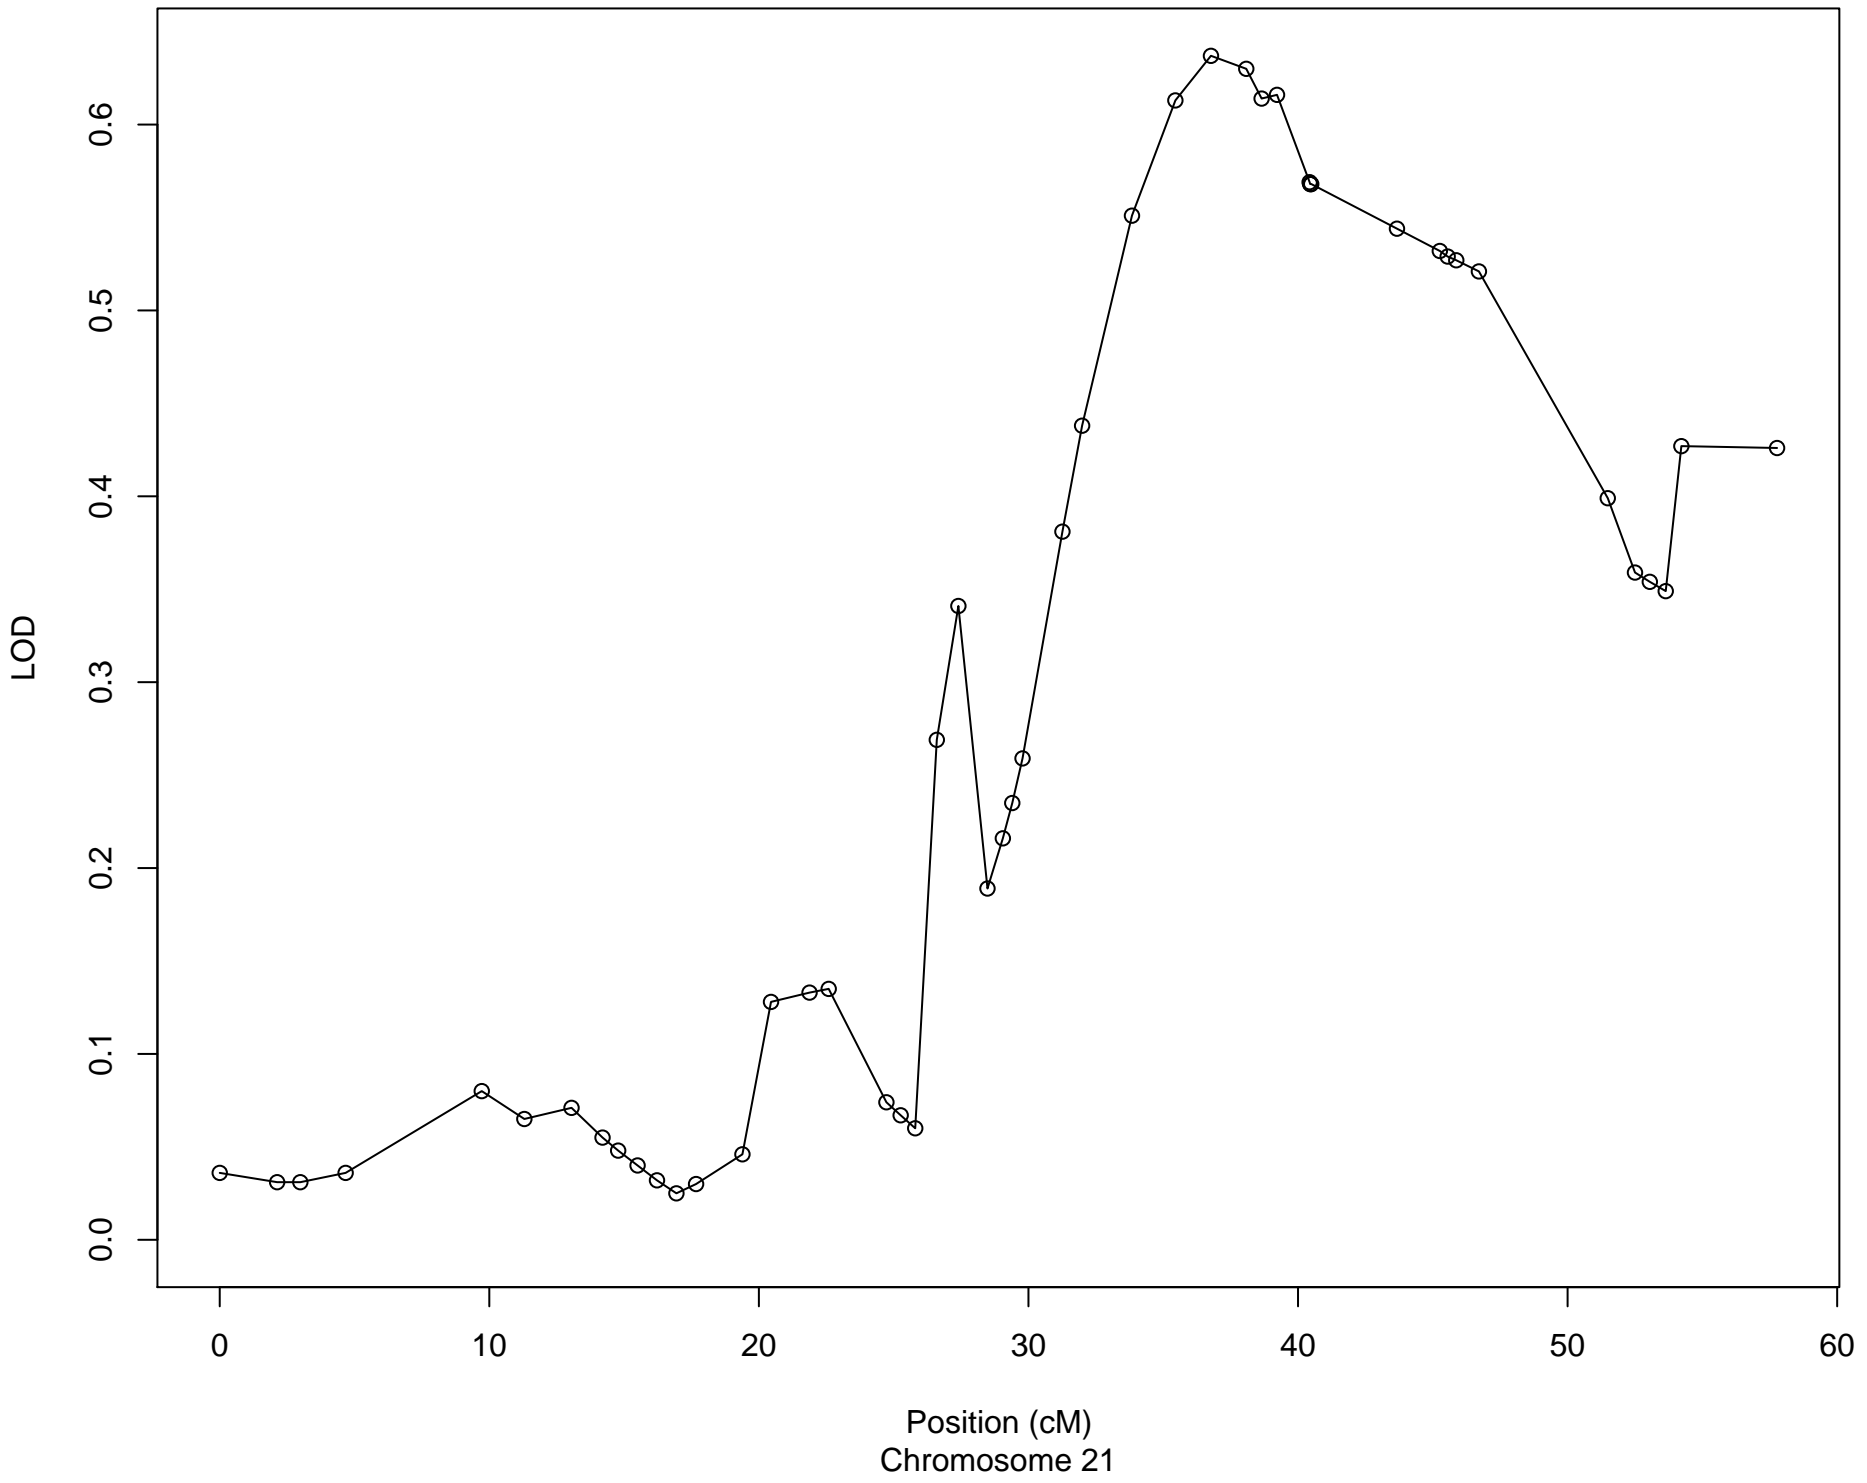

# IC50 (Irinotecan) (IC50\_CPT11)

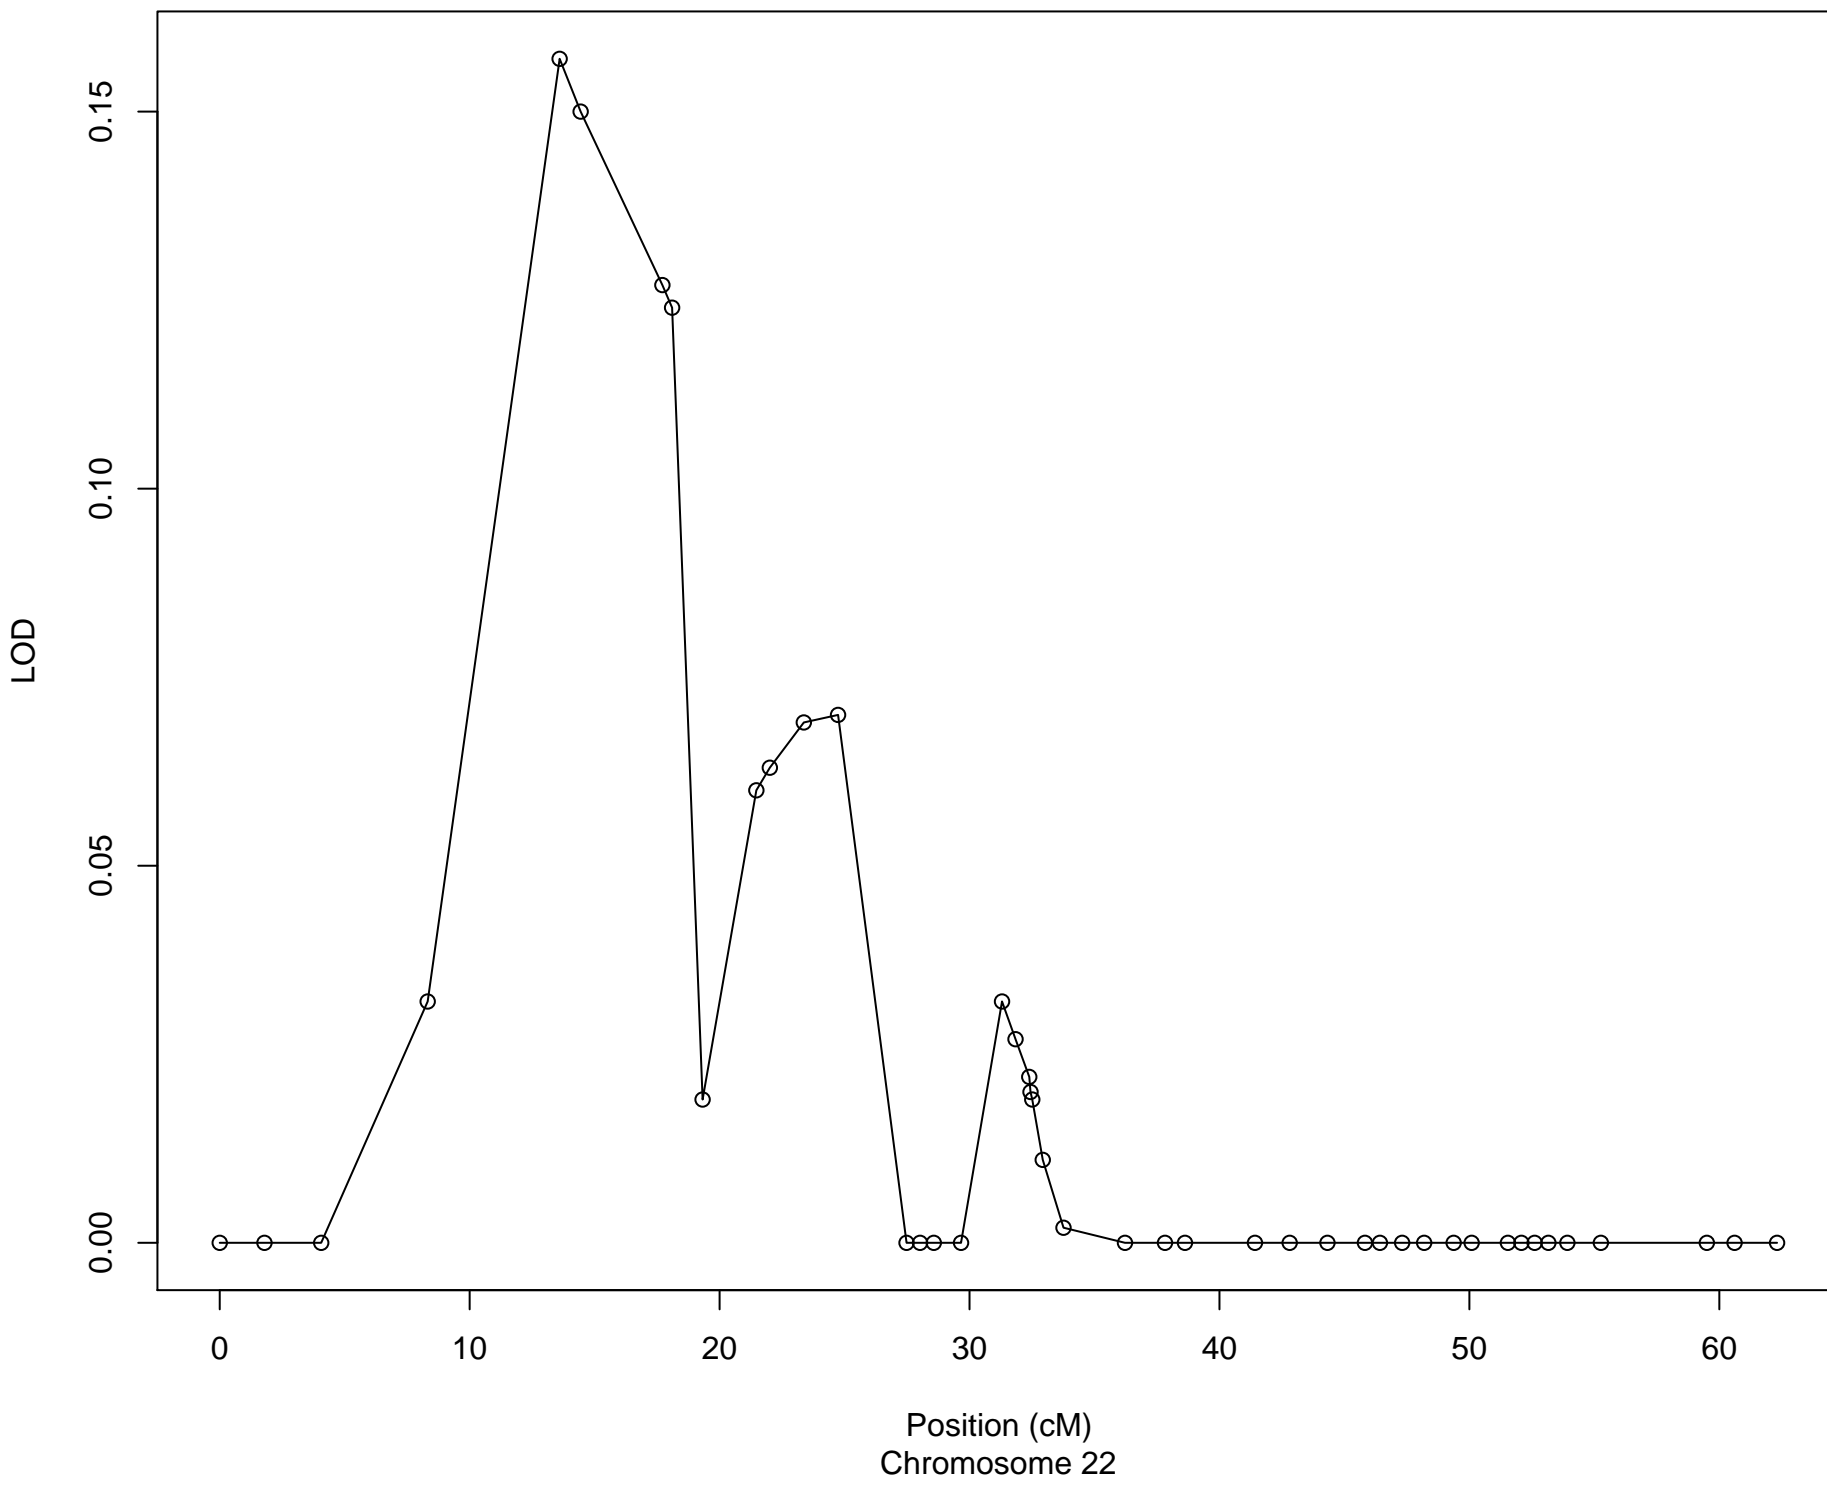

# IC50 (Topotecan) (IC50\_TPT)

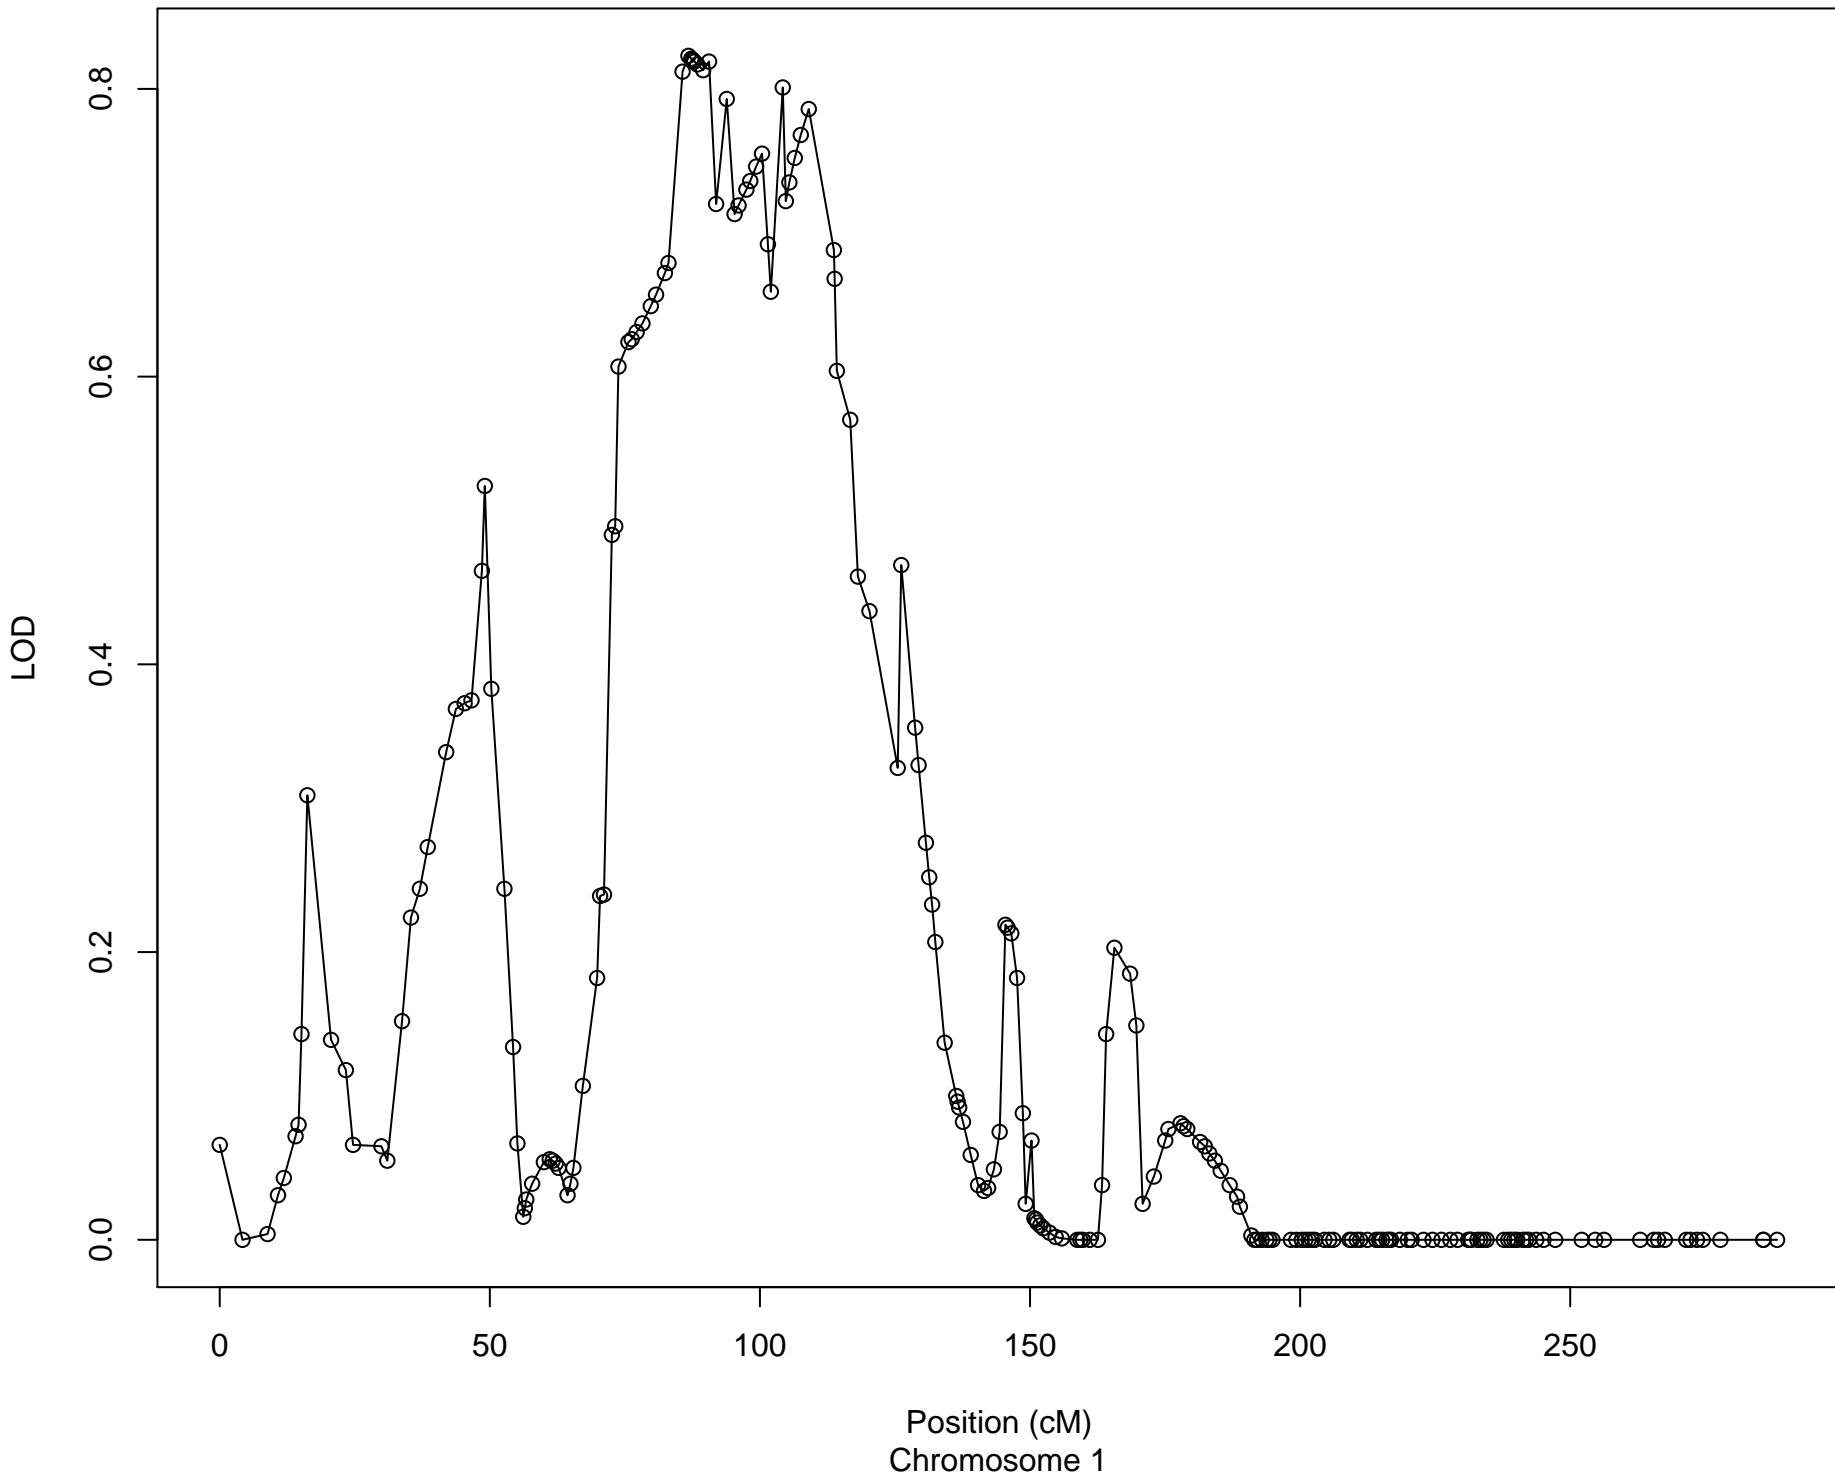

# IC50 (Topotecan) (IC50\_TPT)

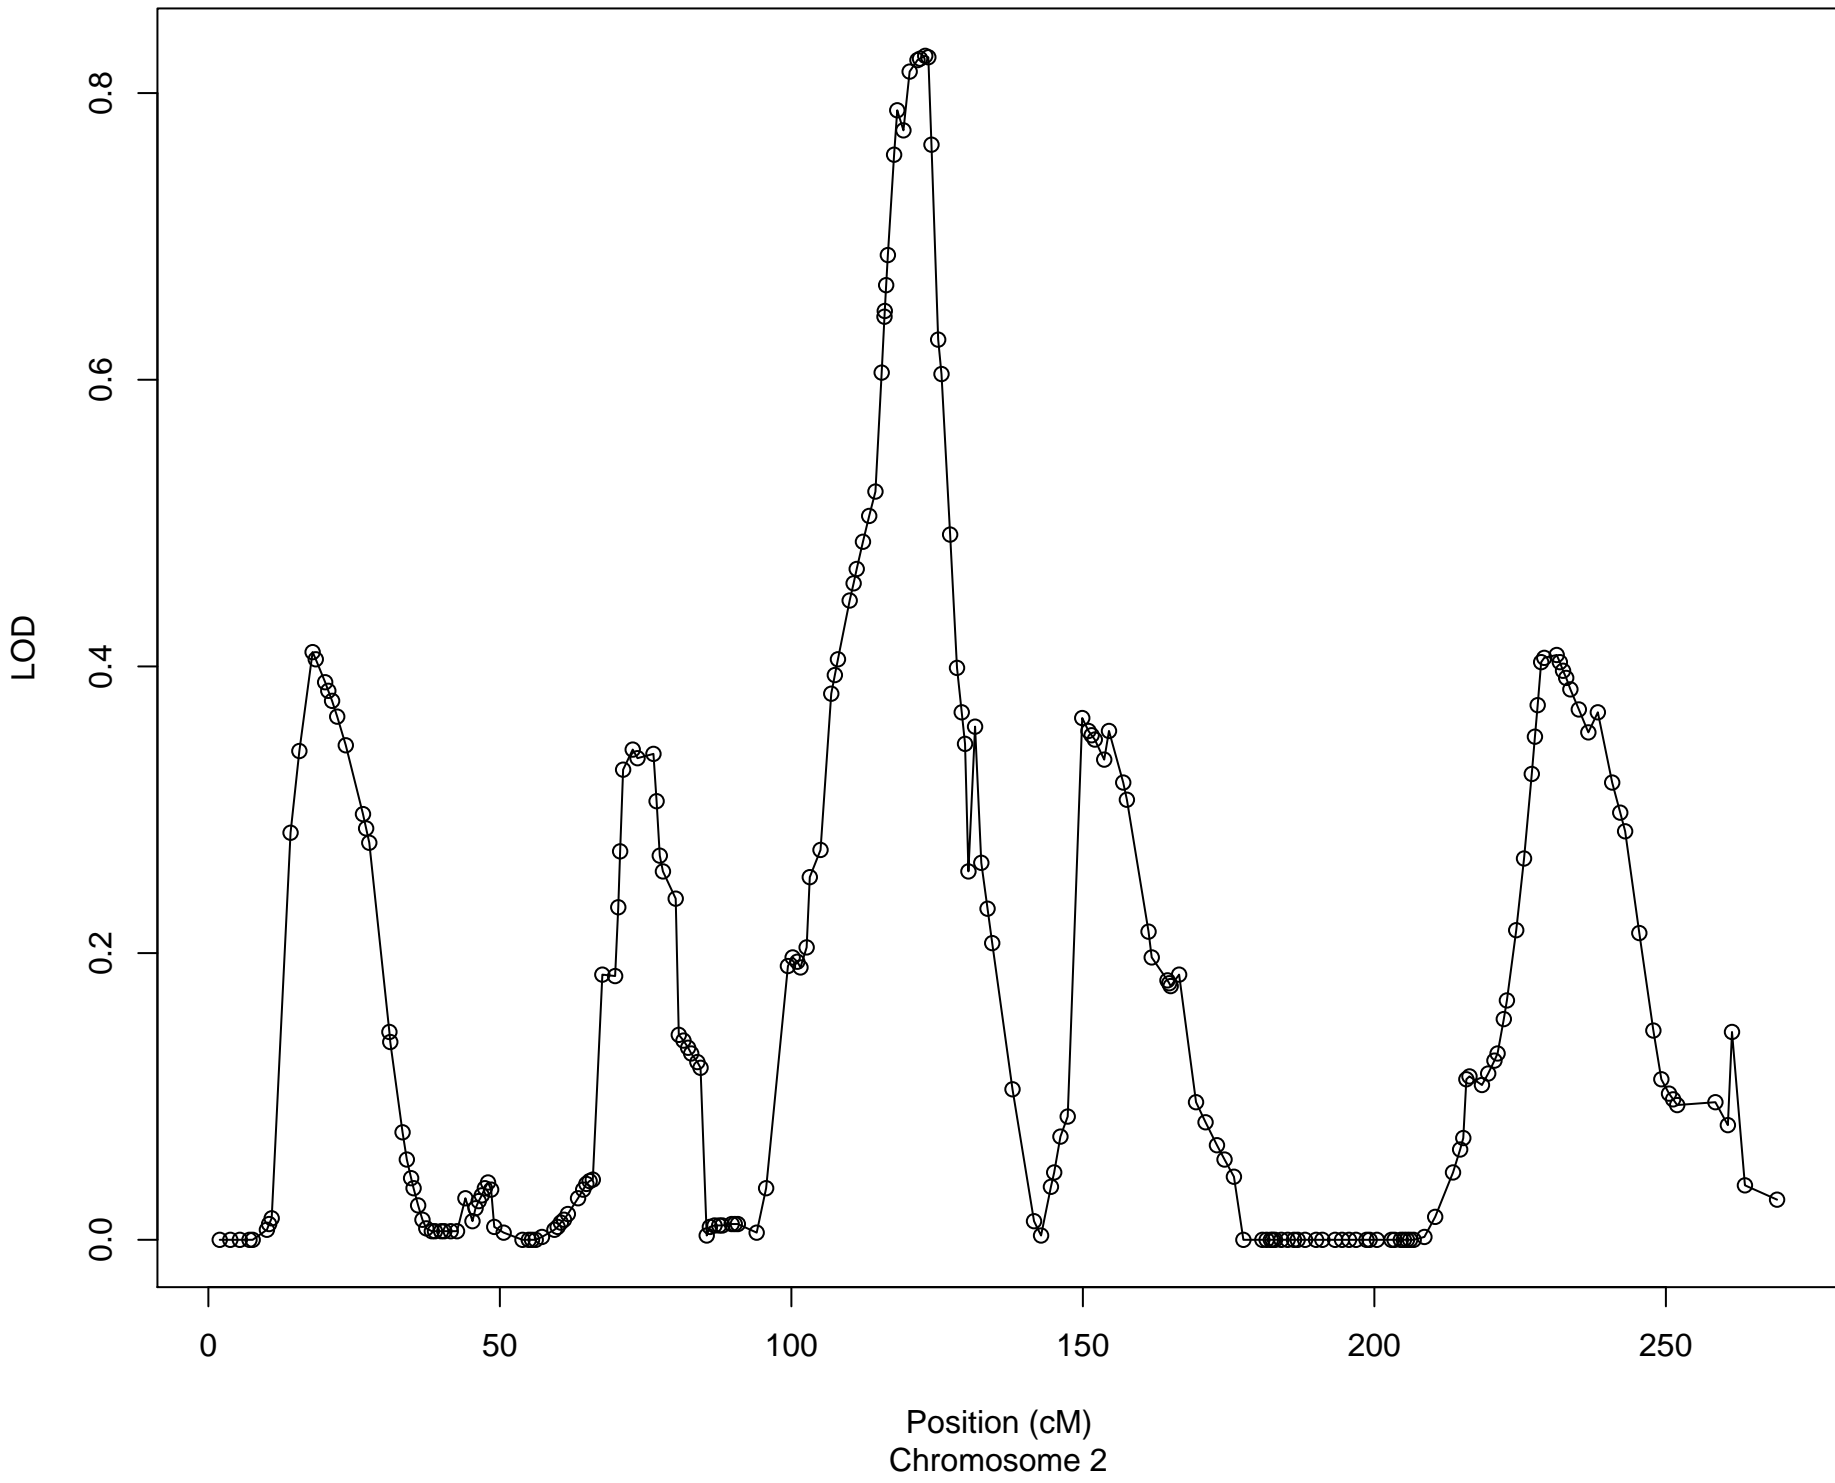



# IC50 (Topotecan) (IC50\_TPT)

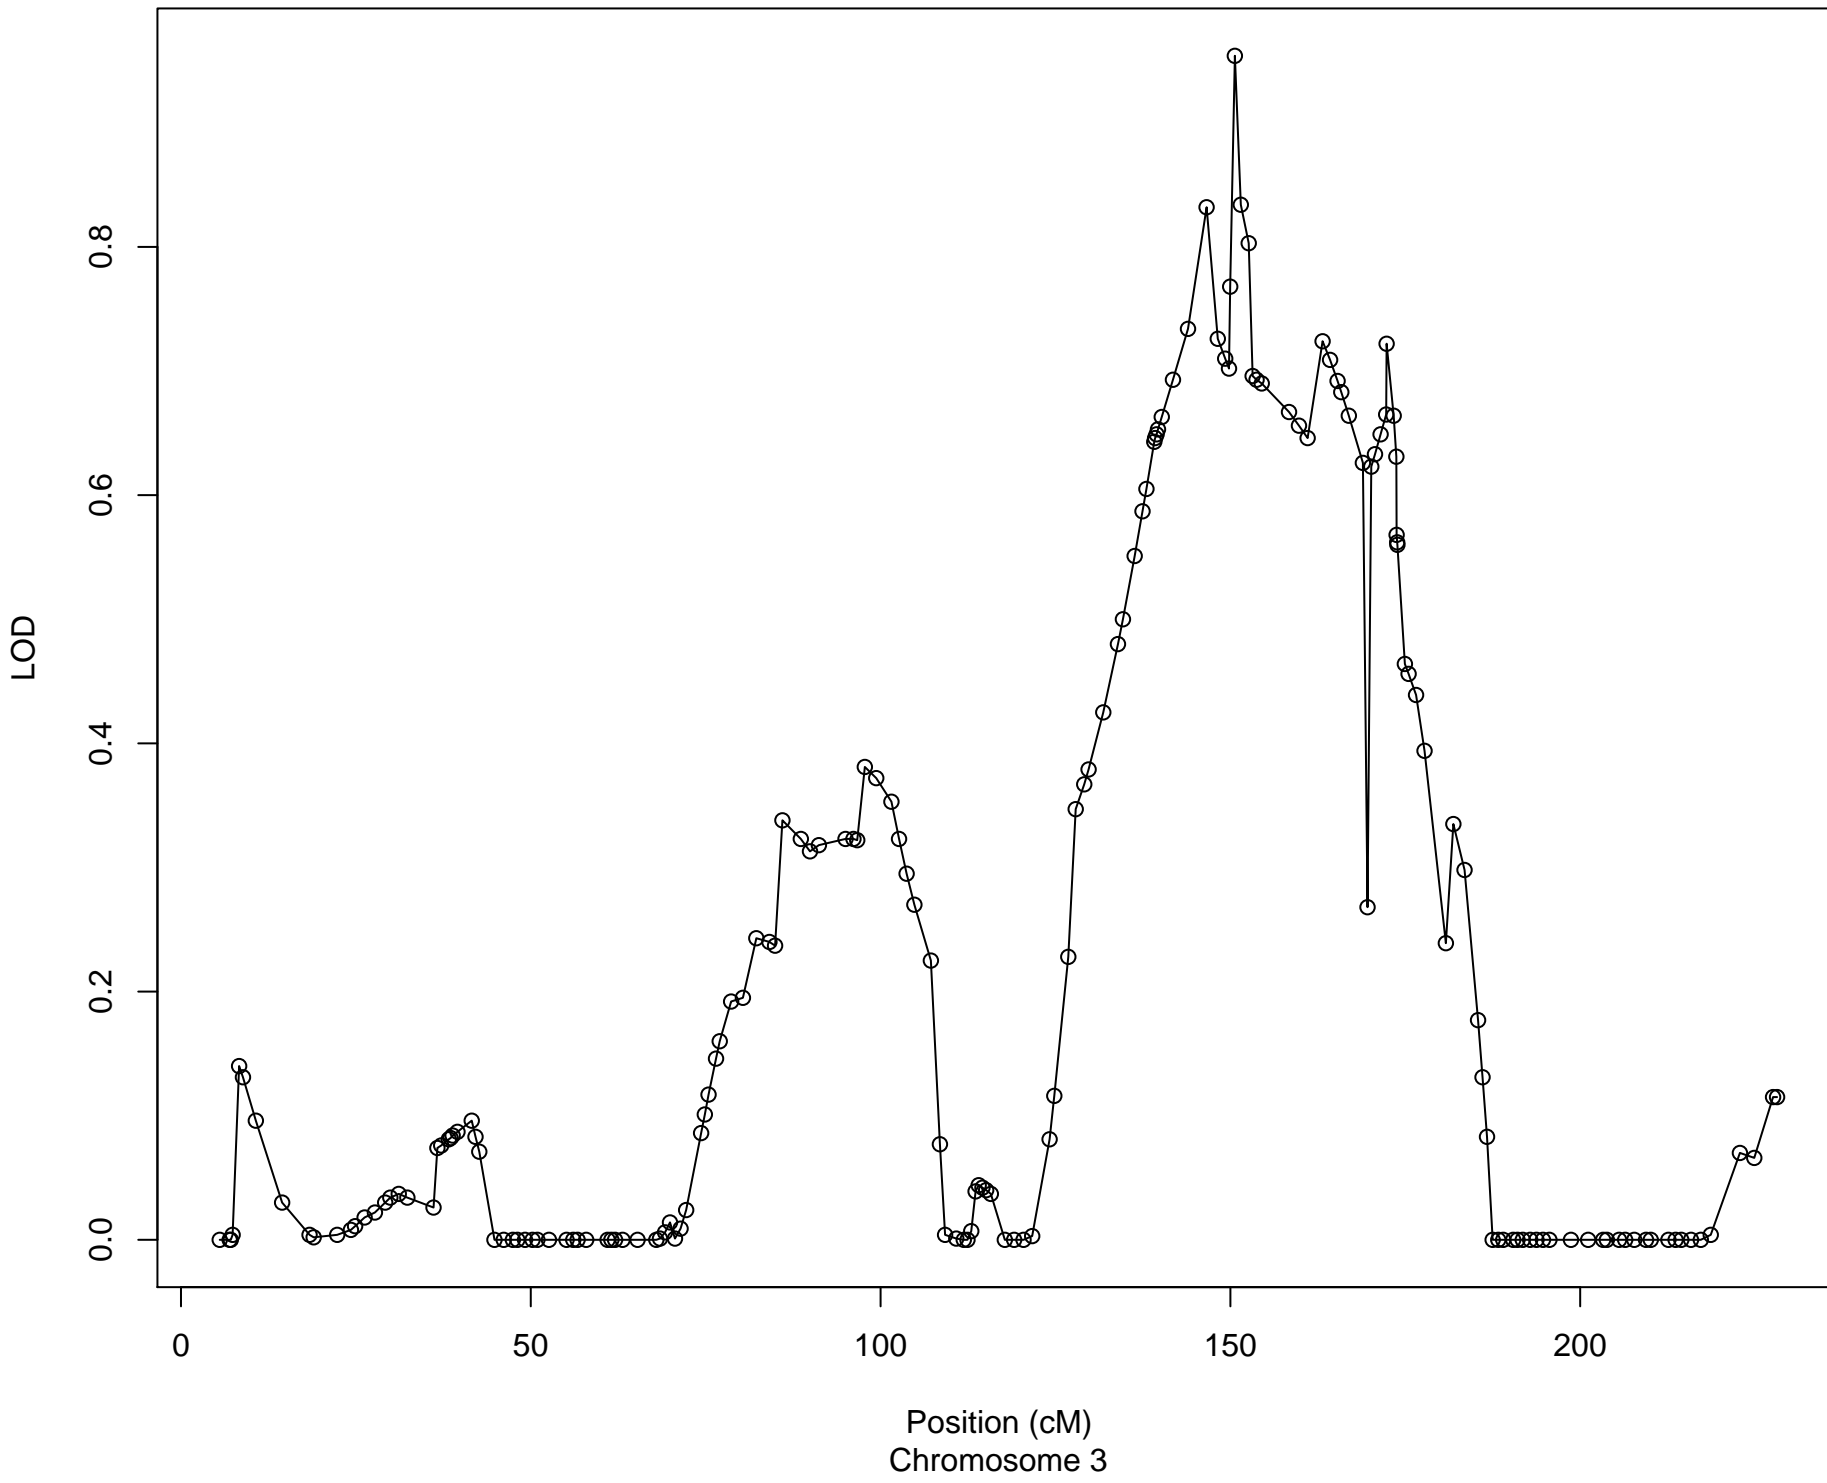

# IC50 (Topotecan) (IC50\_TPT)

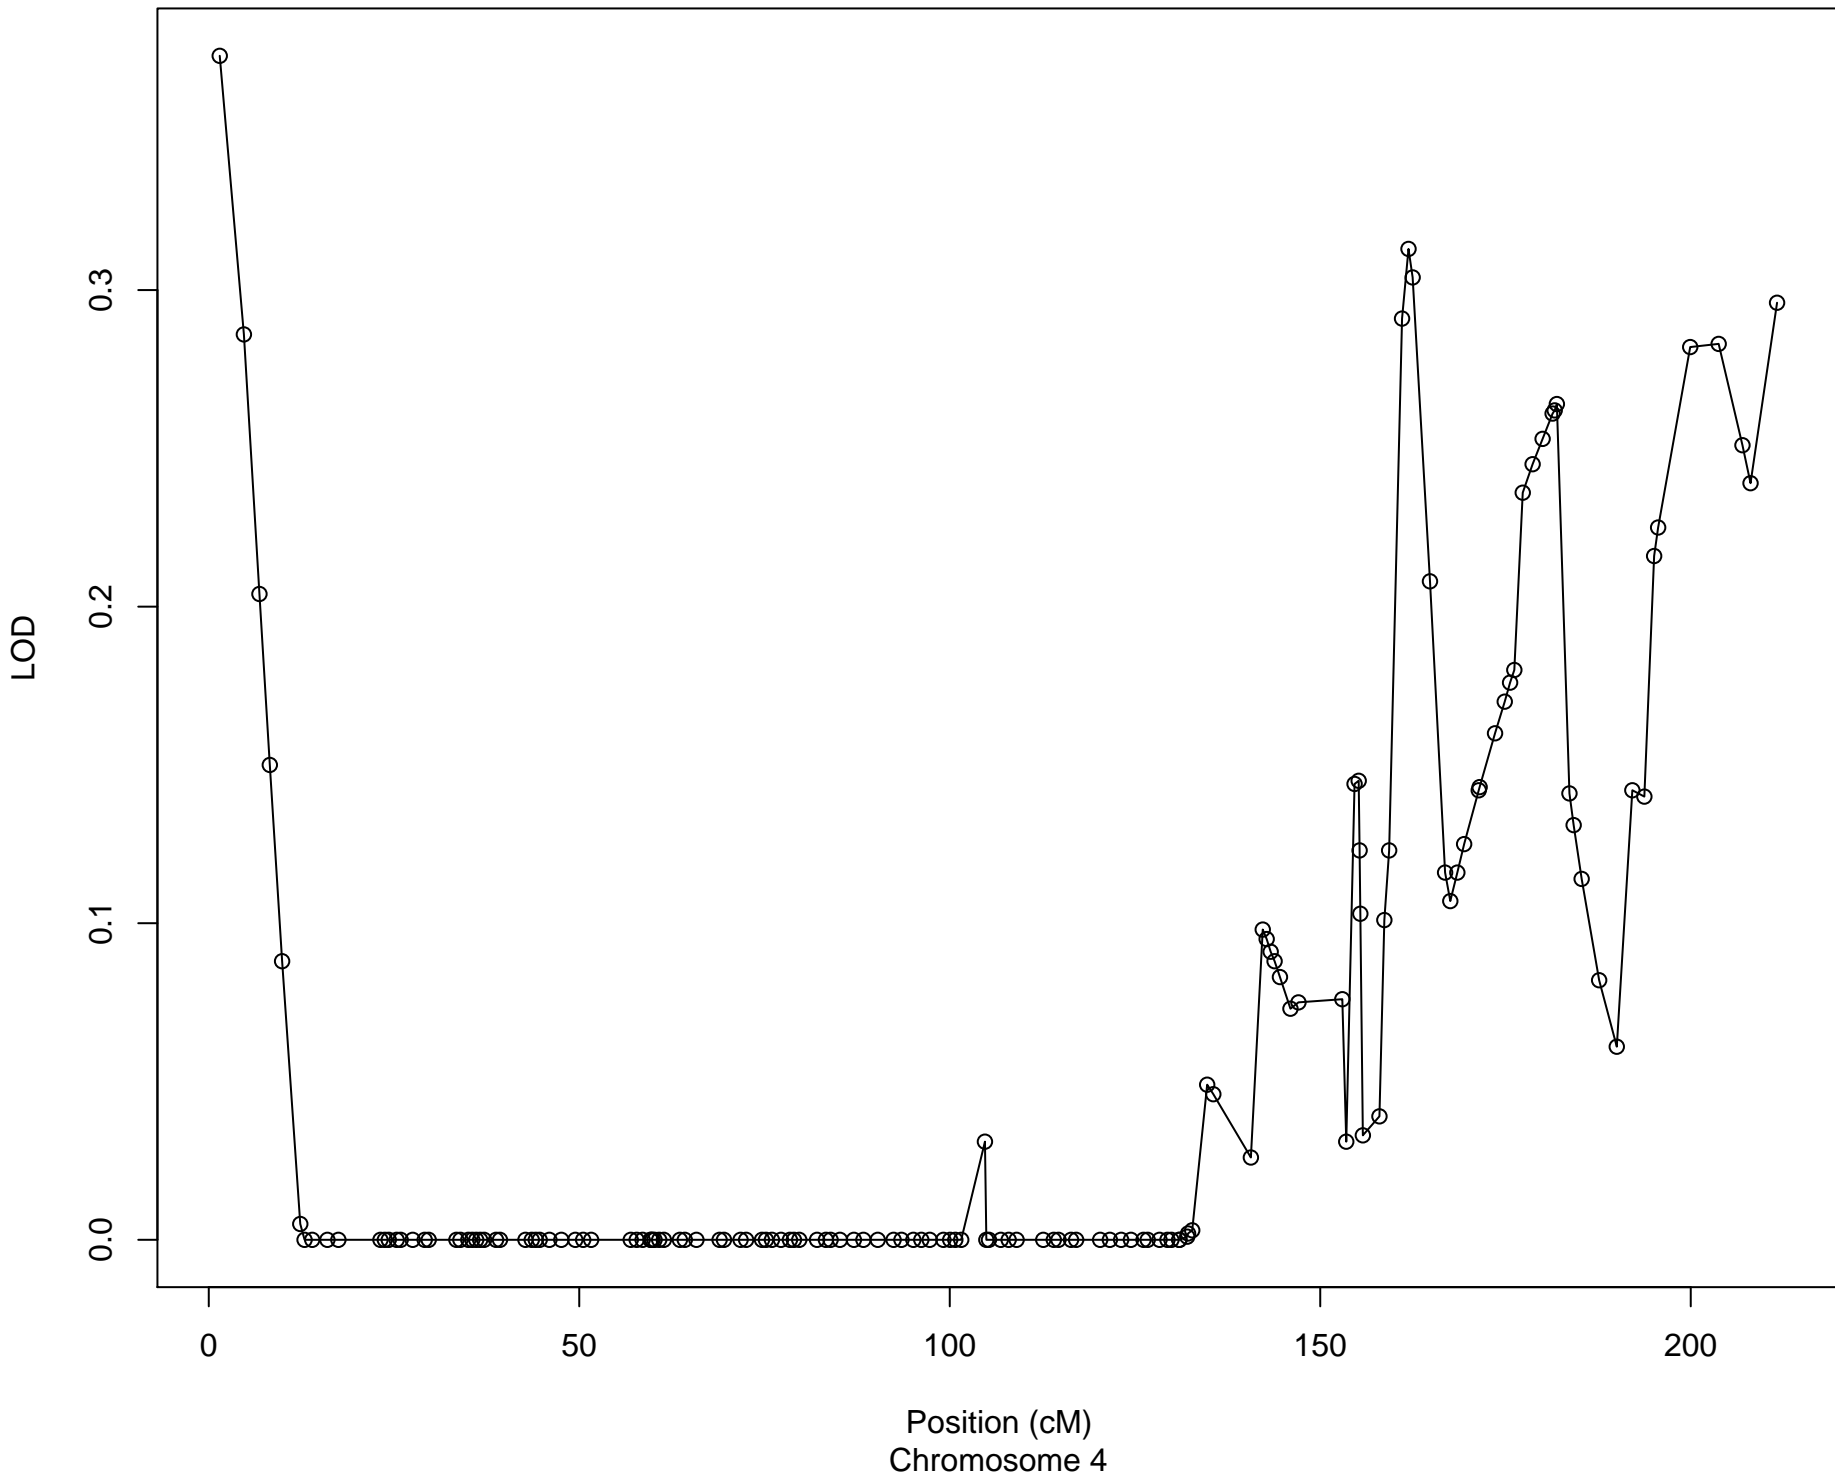

# IC50 (Topotecan) (IC50\_TPT)

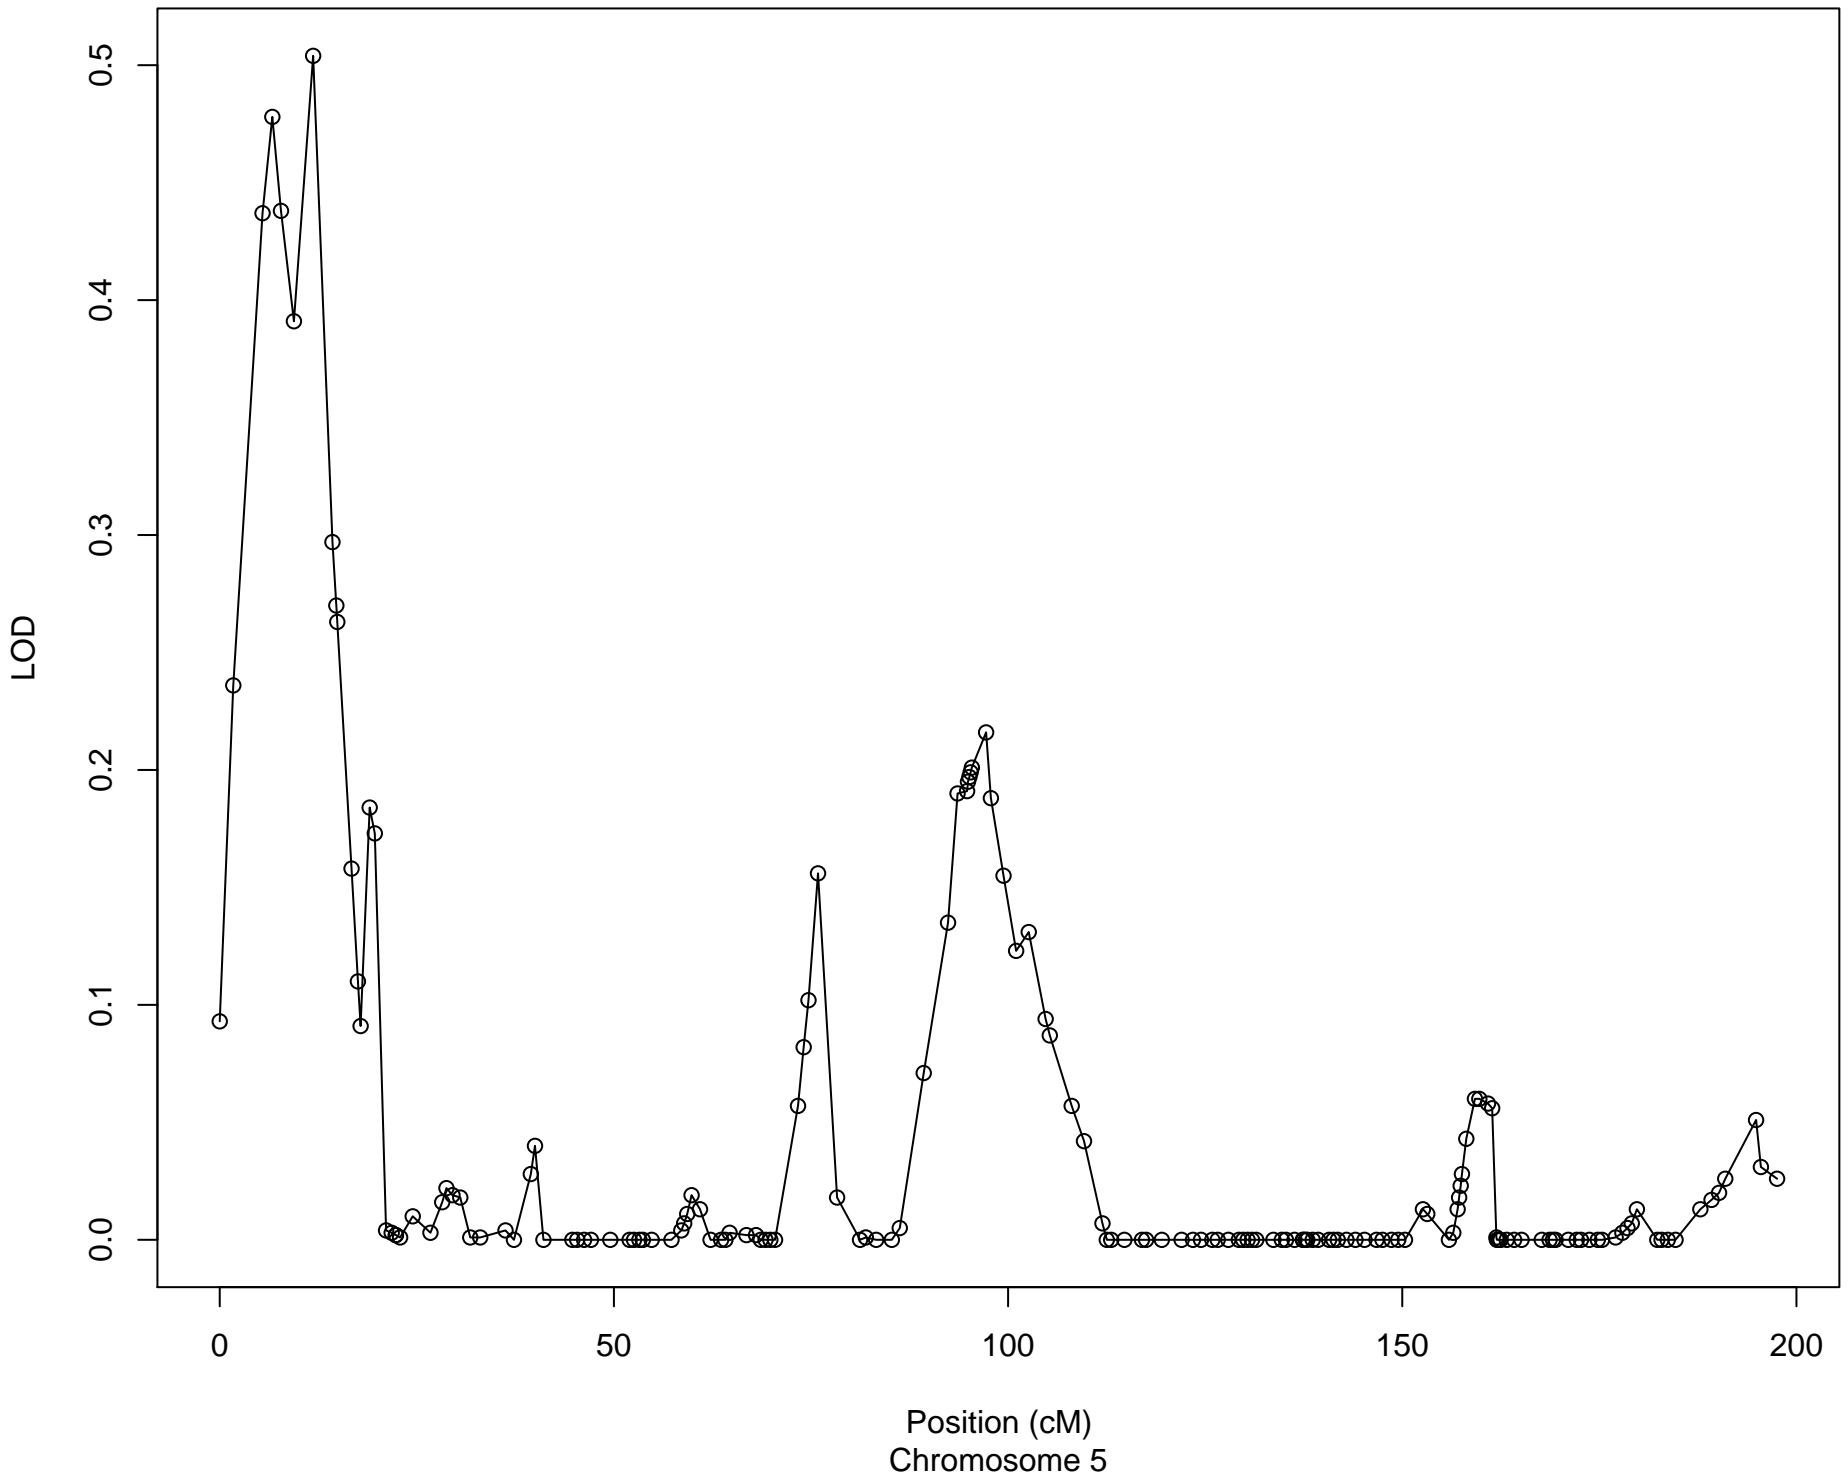

# IC50 (Topotecan) (IC50\_TPT)

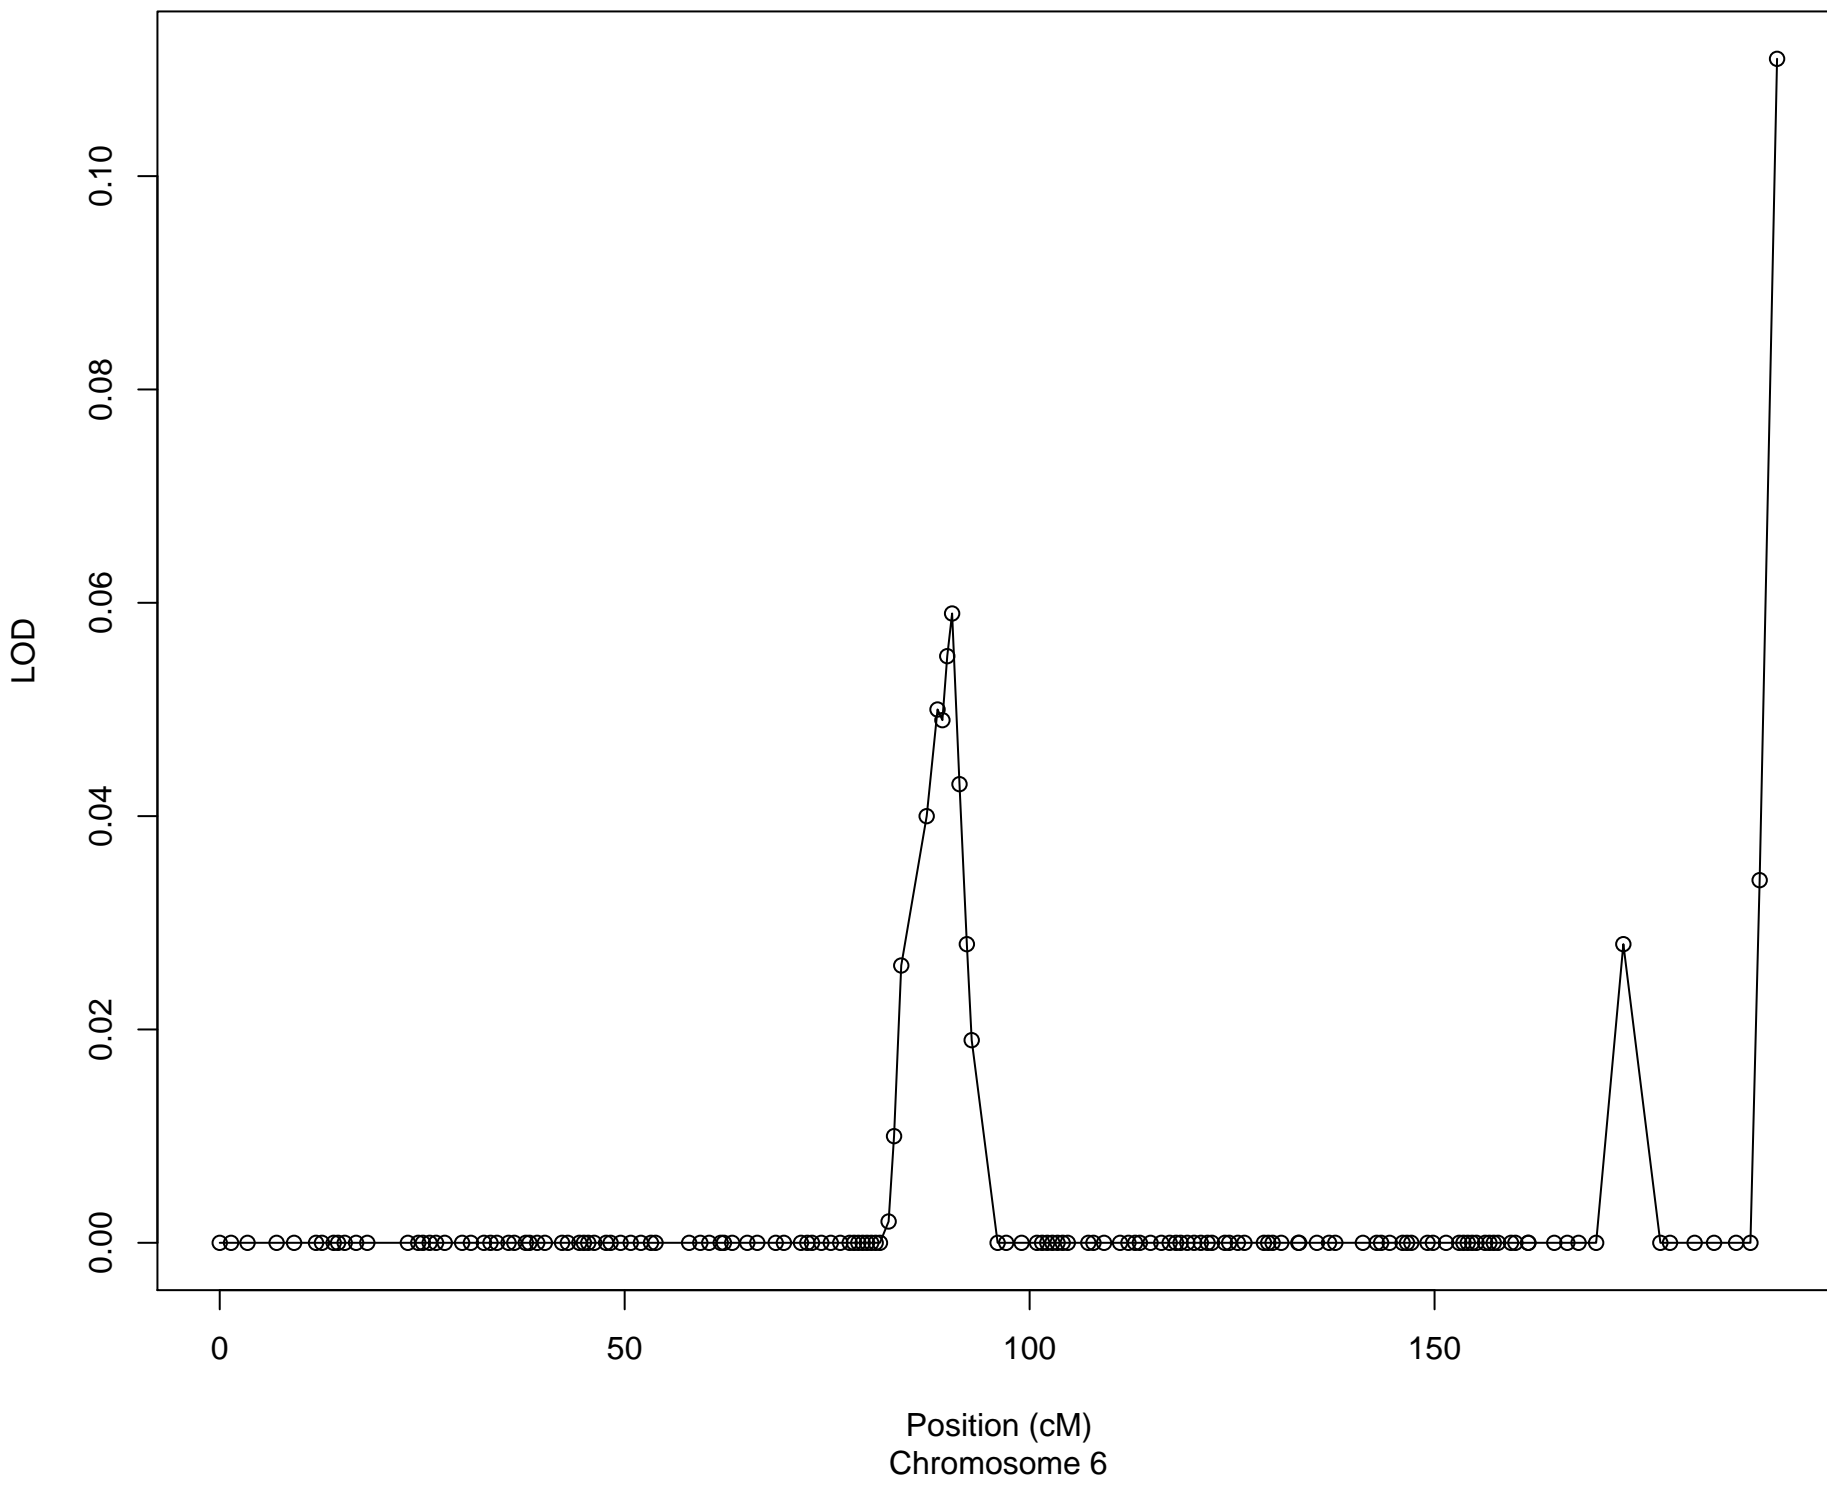

# IC50 (Topotecan) (IC50\_TPT)

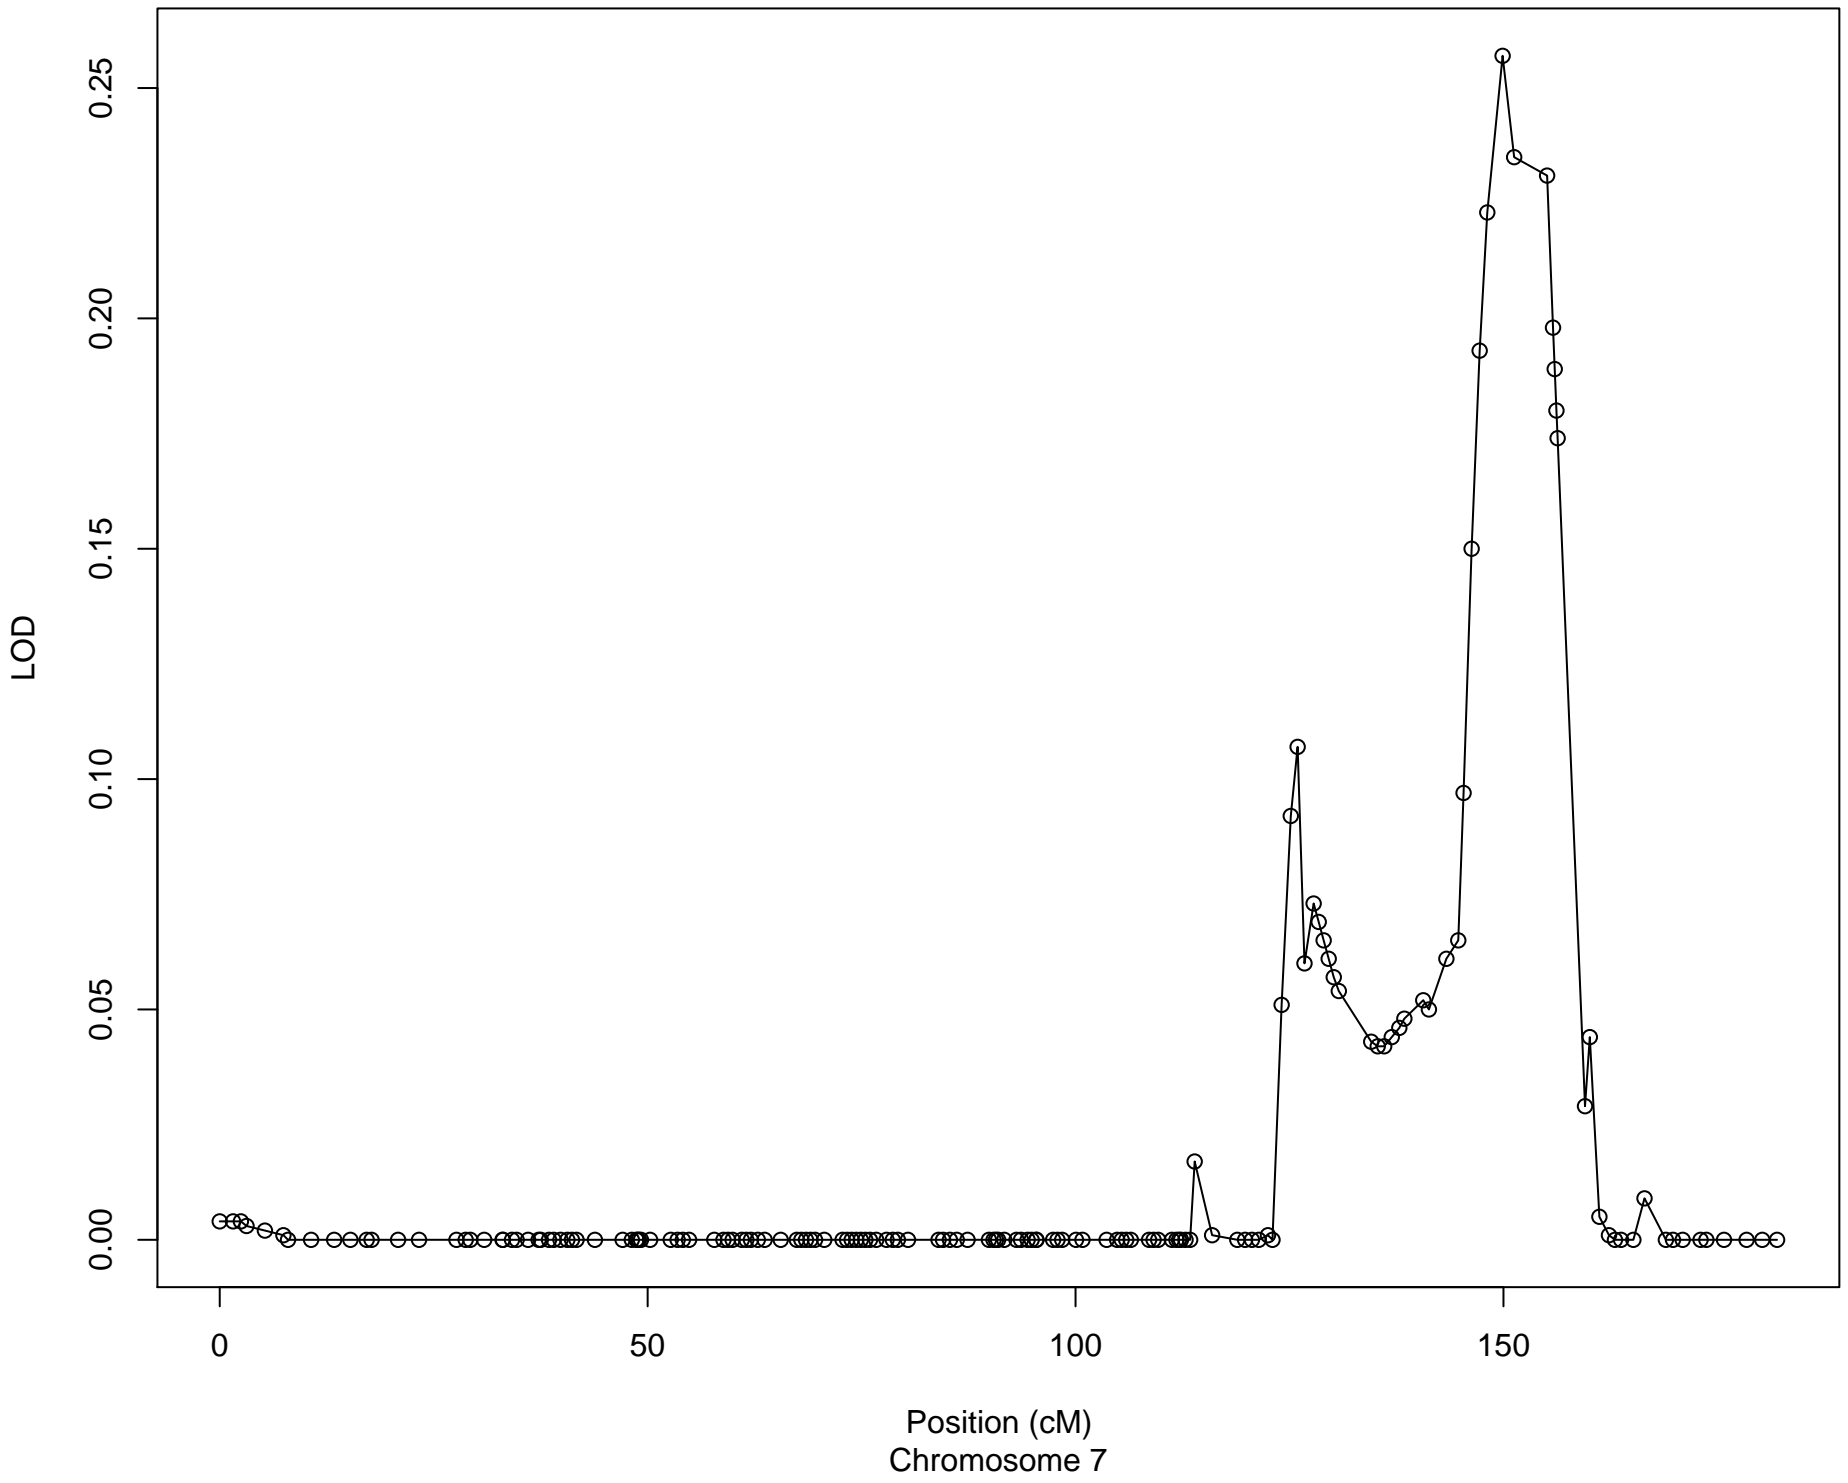

# IC50 (Topotecan) (IC50\_TPT)

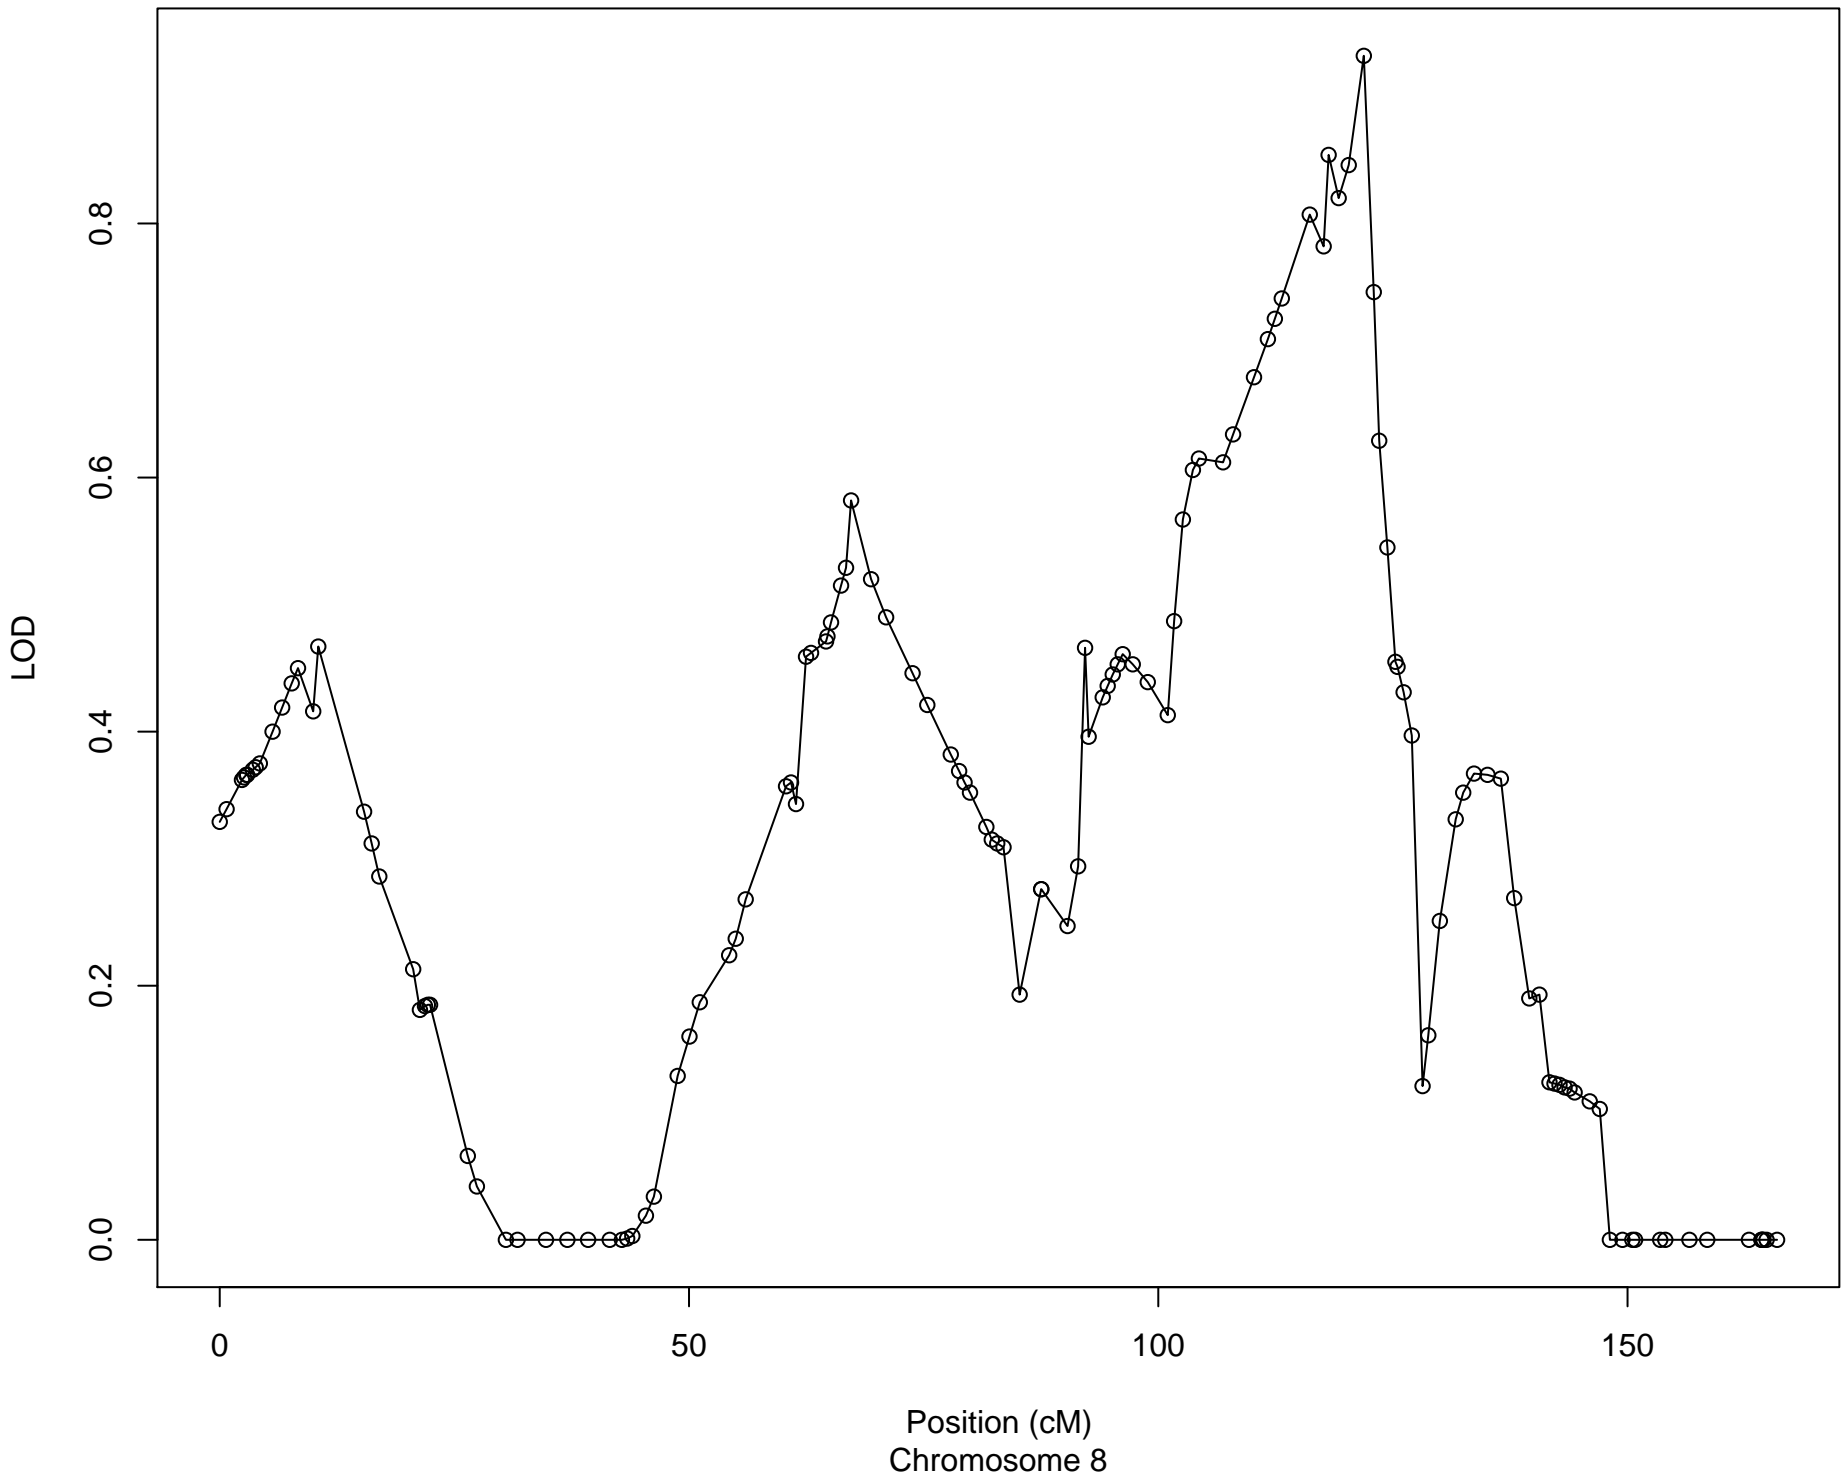

# IC50 (Topotecan) (IC50\_TPT)

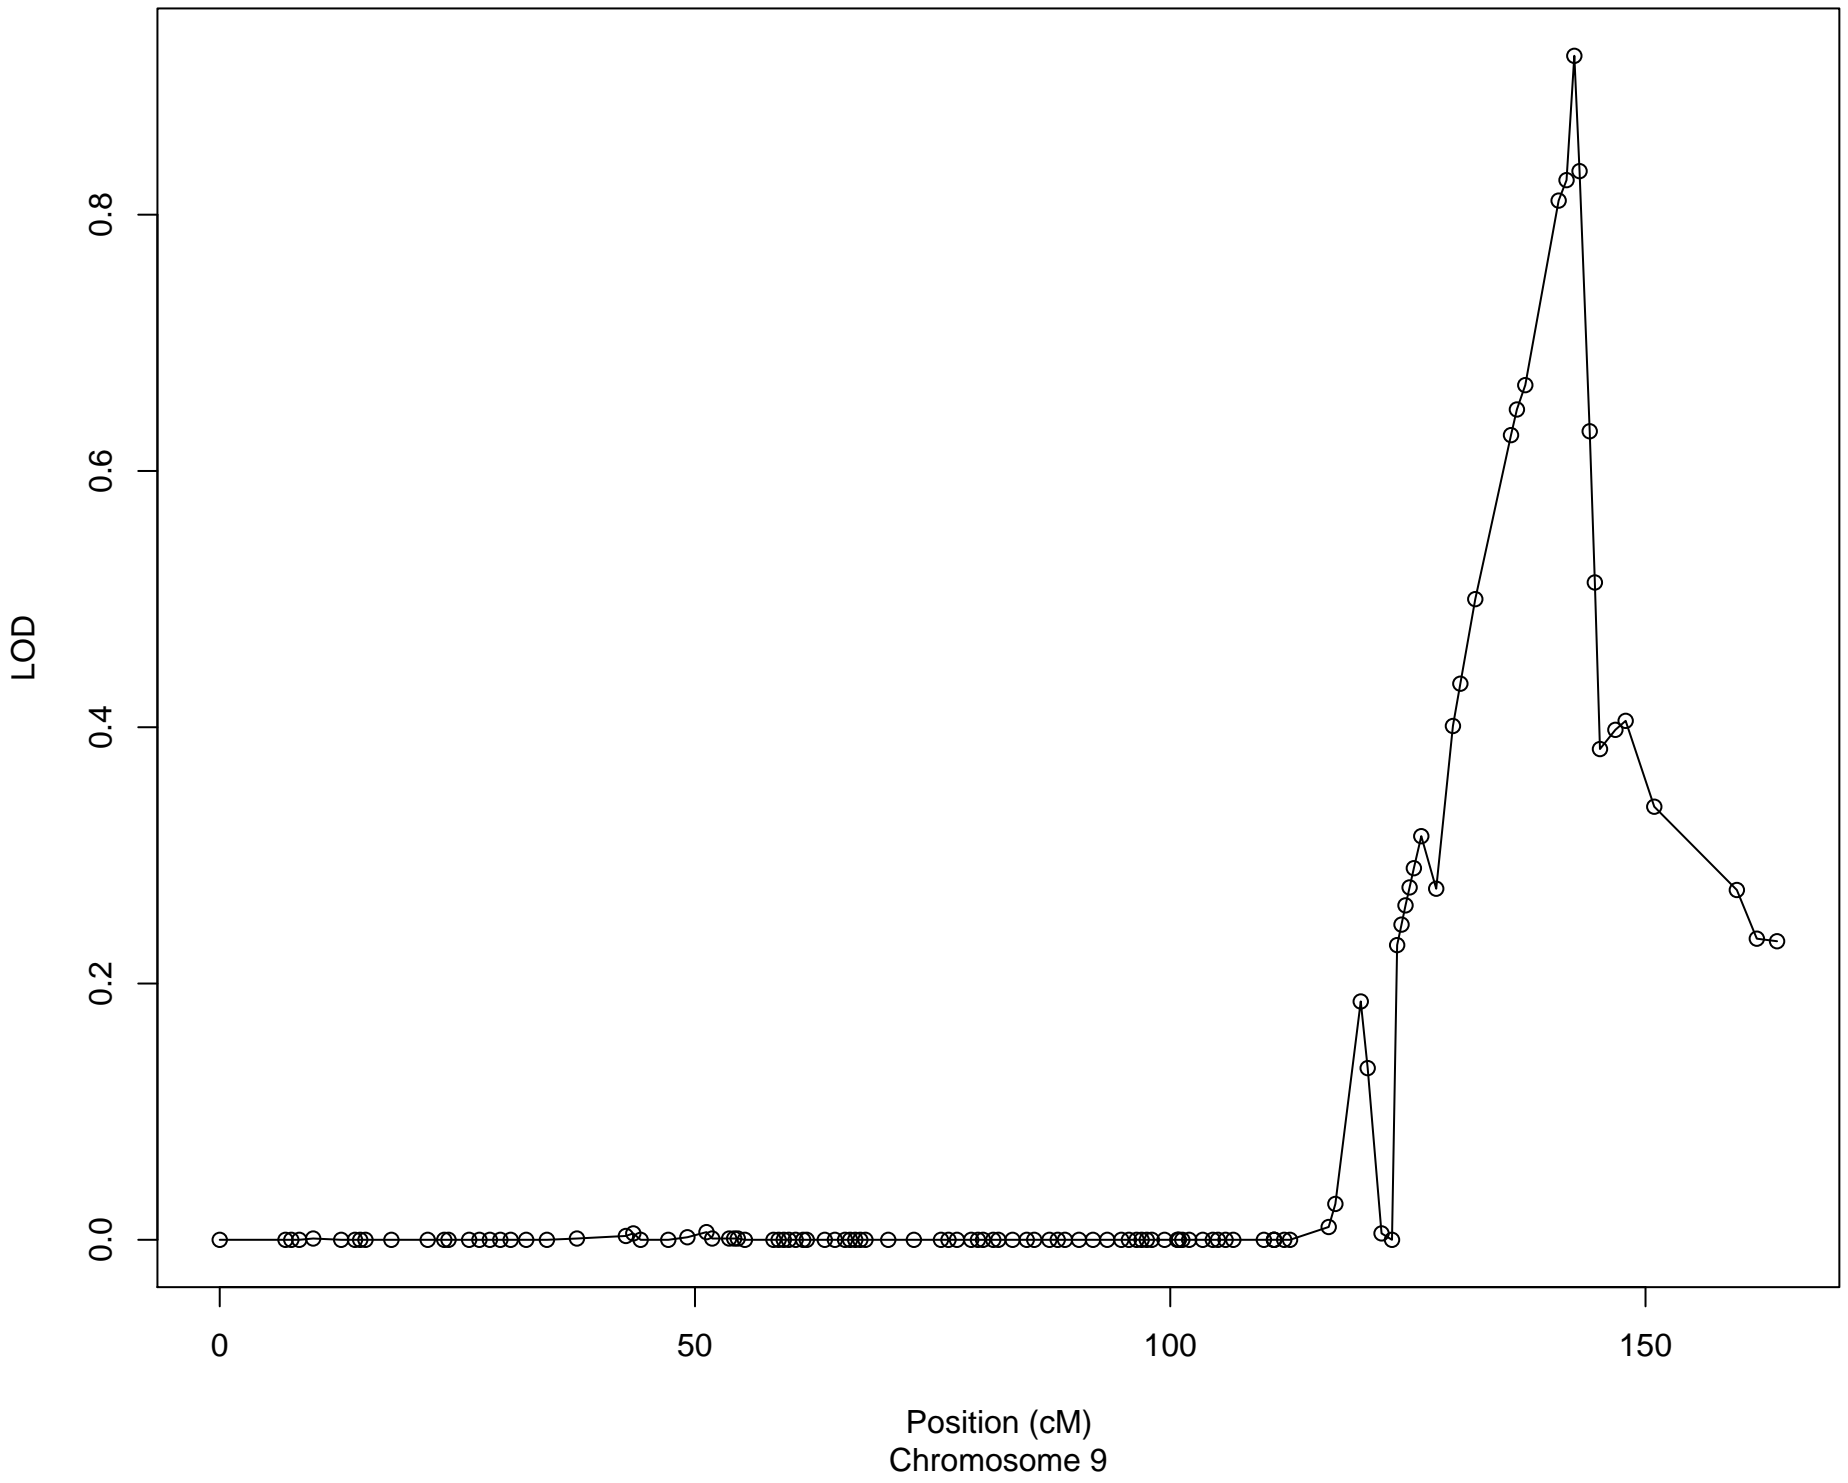

# IC50 (Topotecan) (IC50\_TPT)

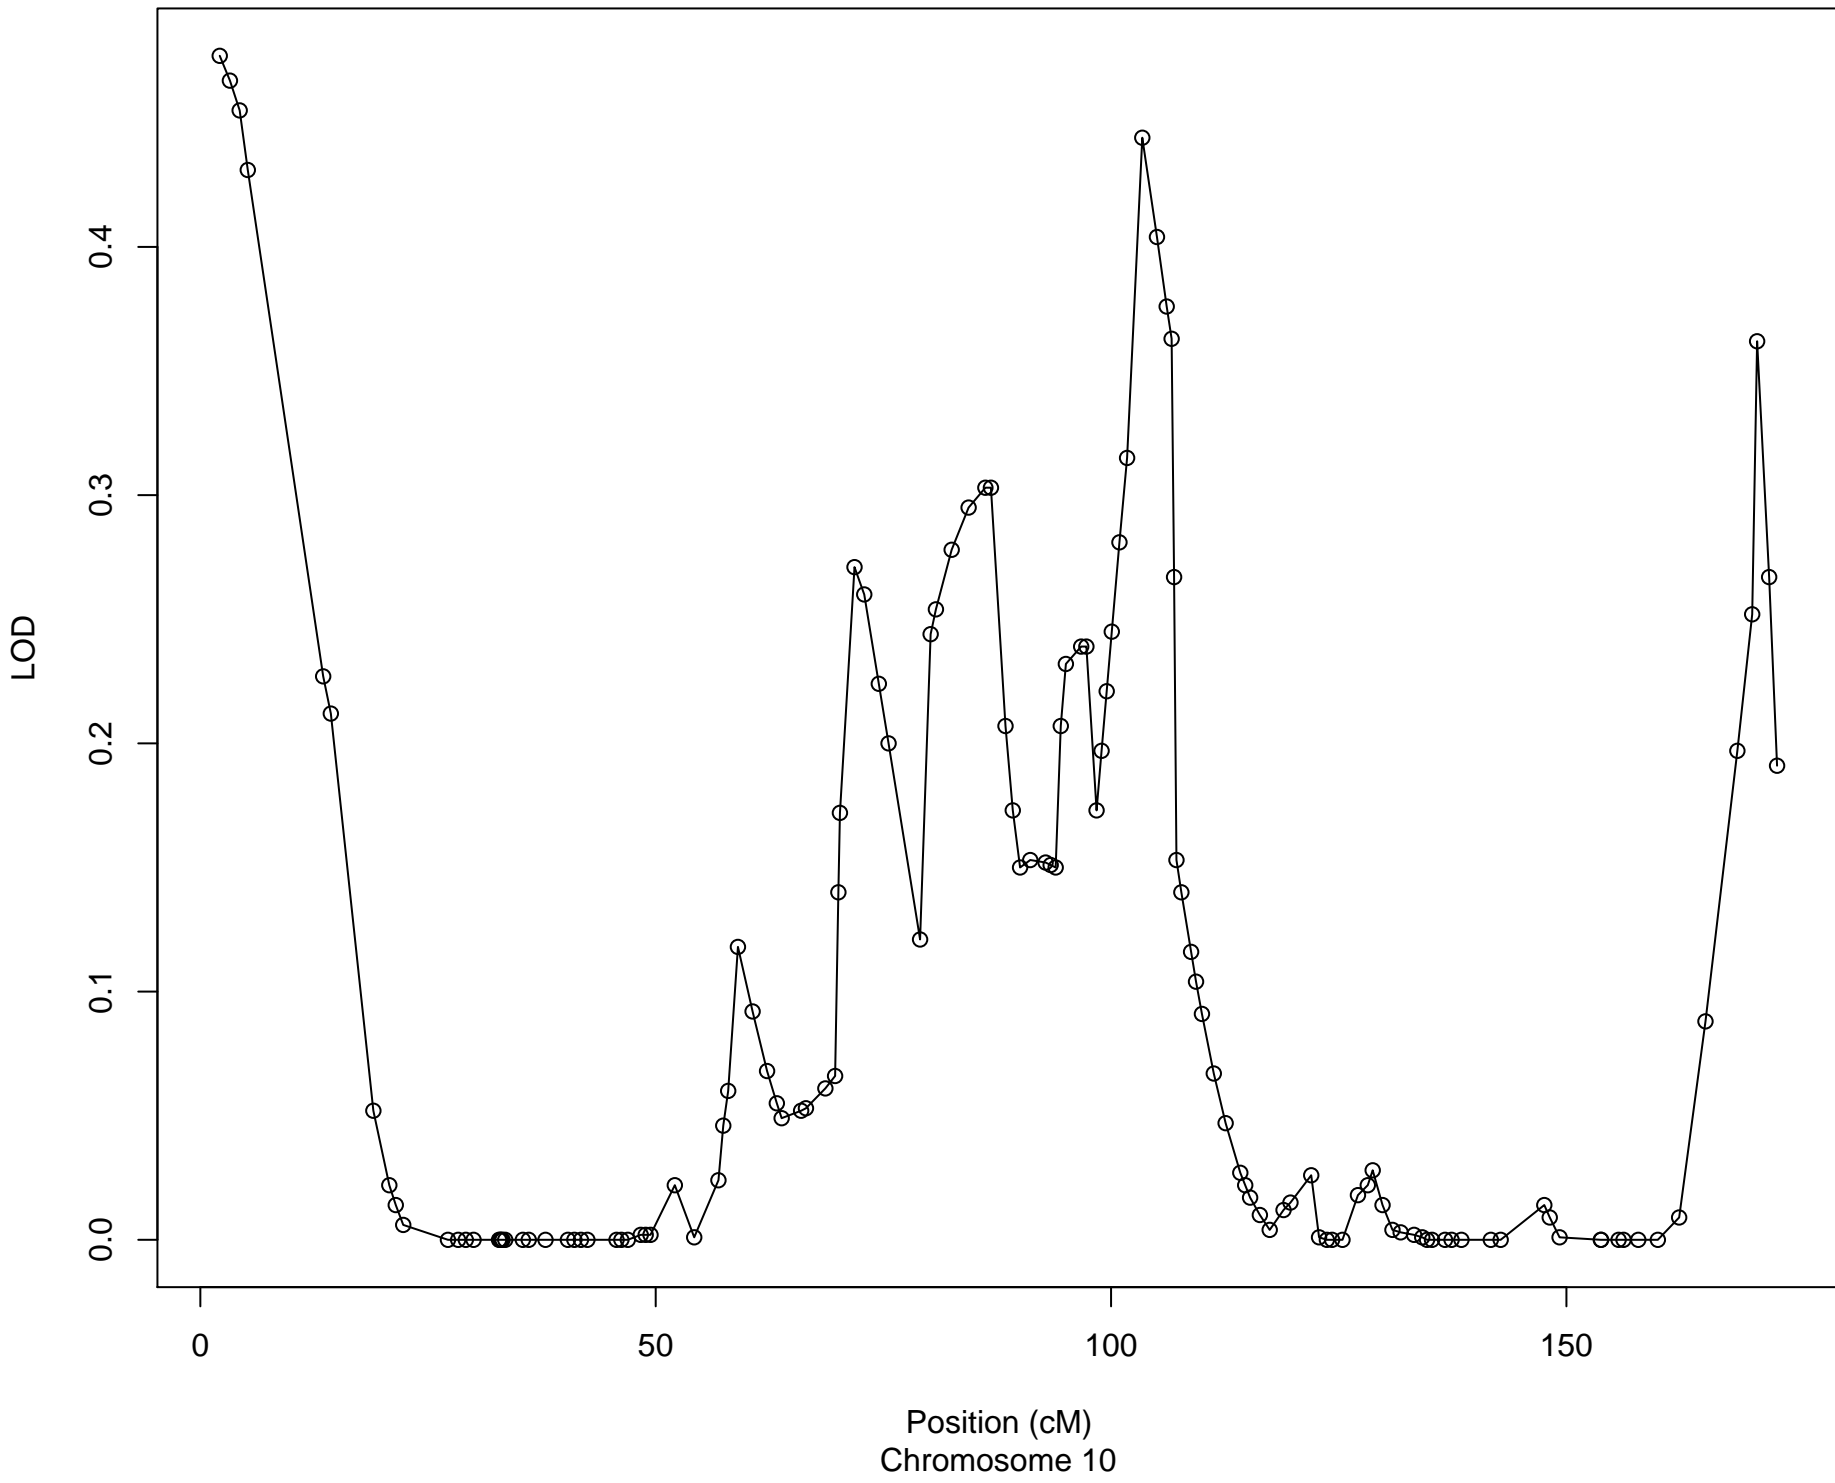



# IC50 (Topotecan) (IC50\_TPT)

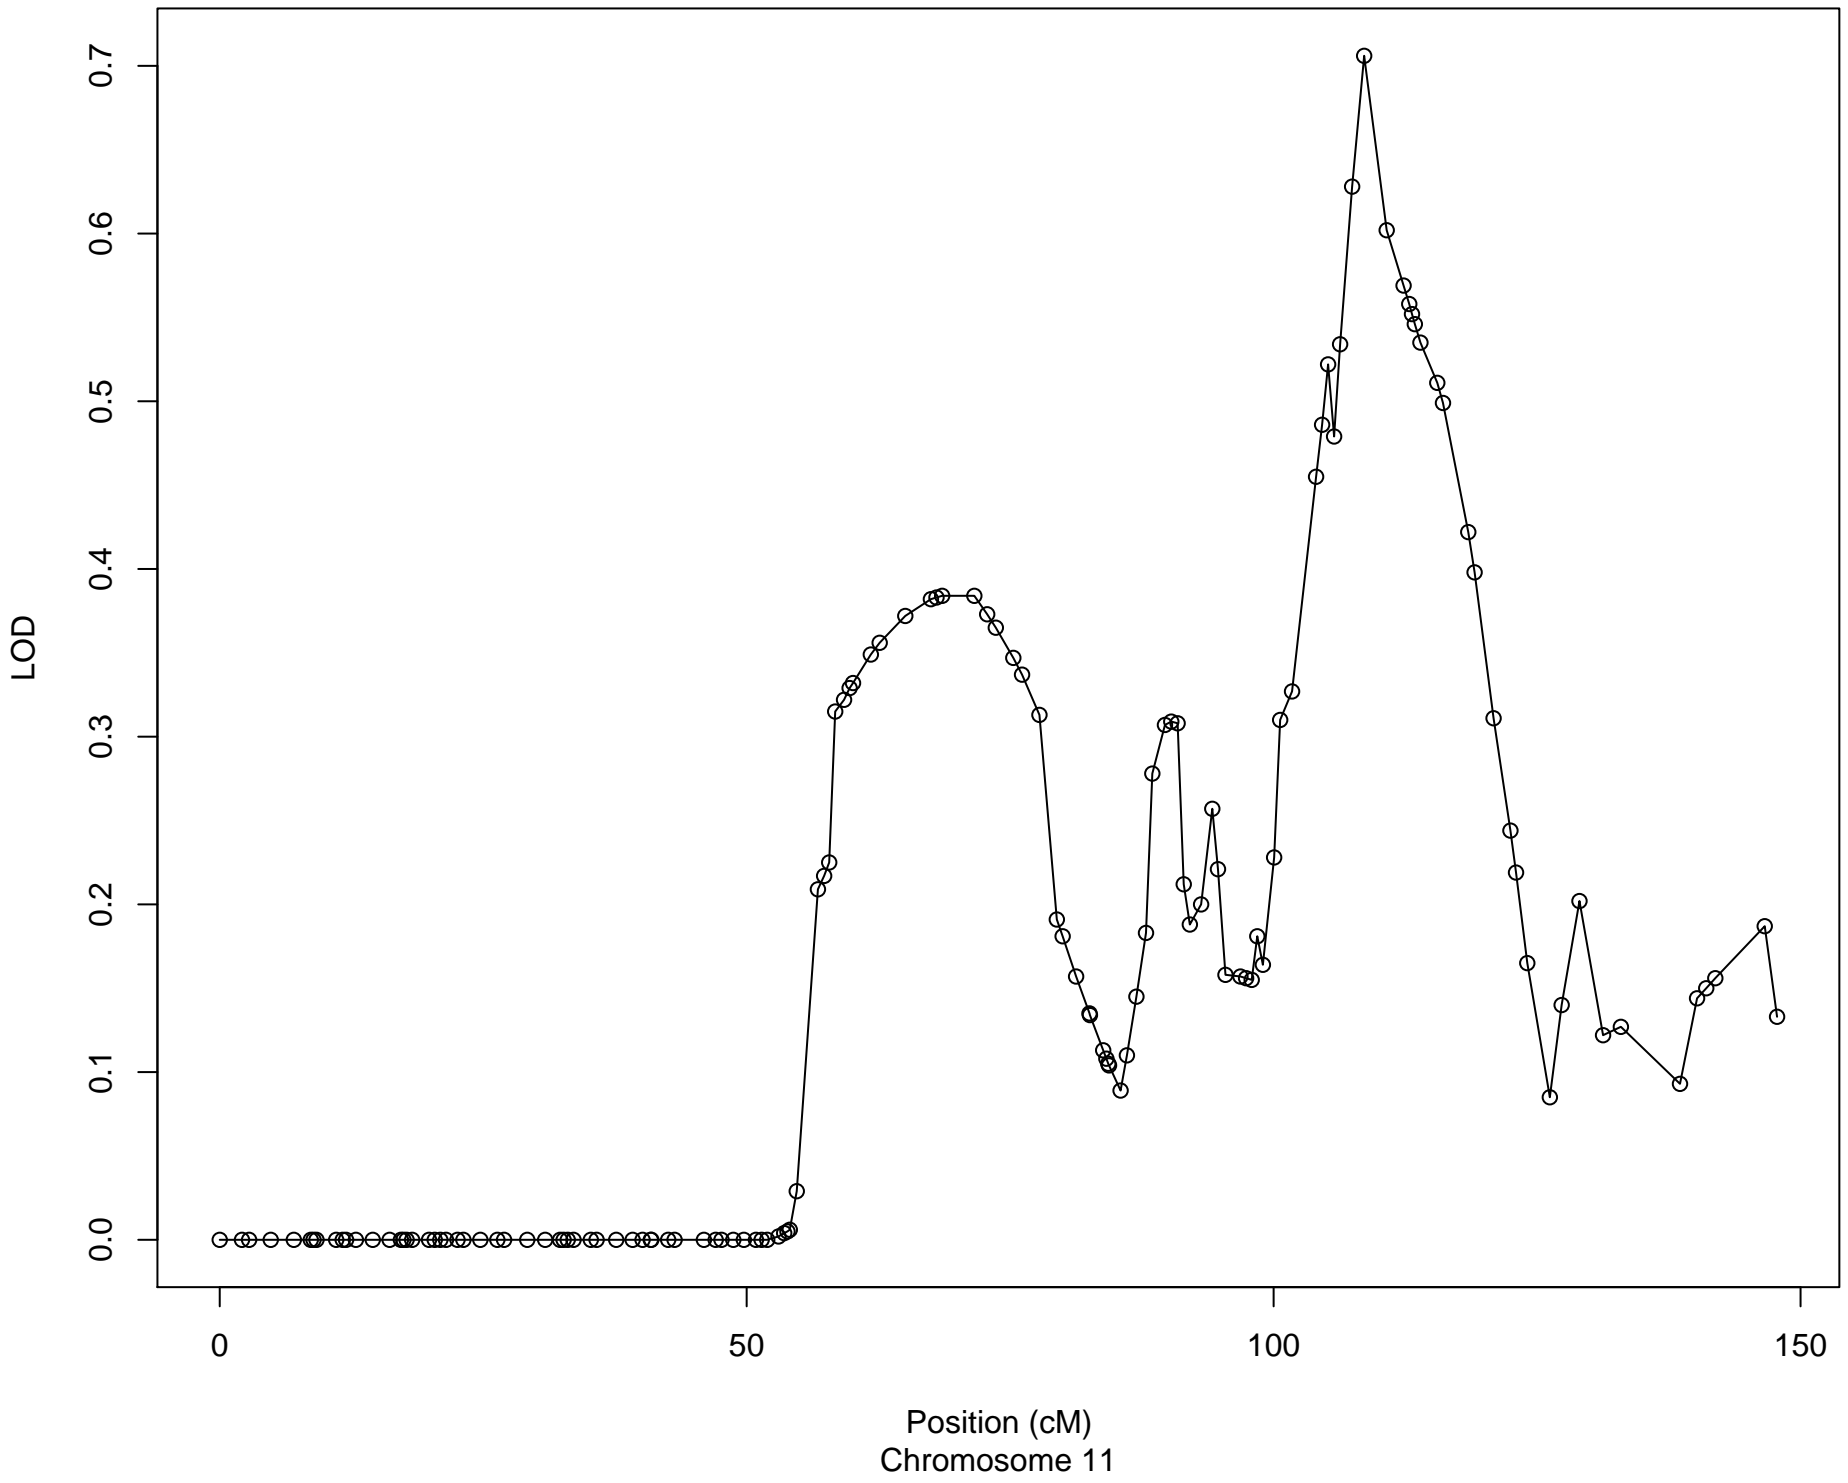

# IC50 (Topotecan) (IC50\_TPT)

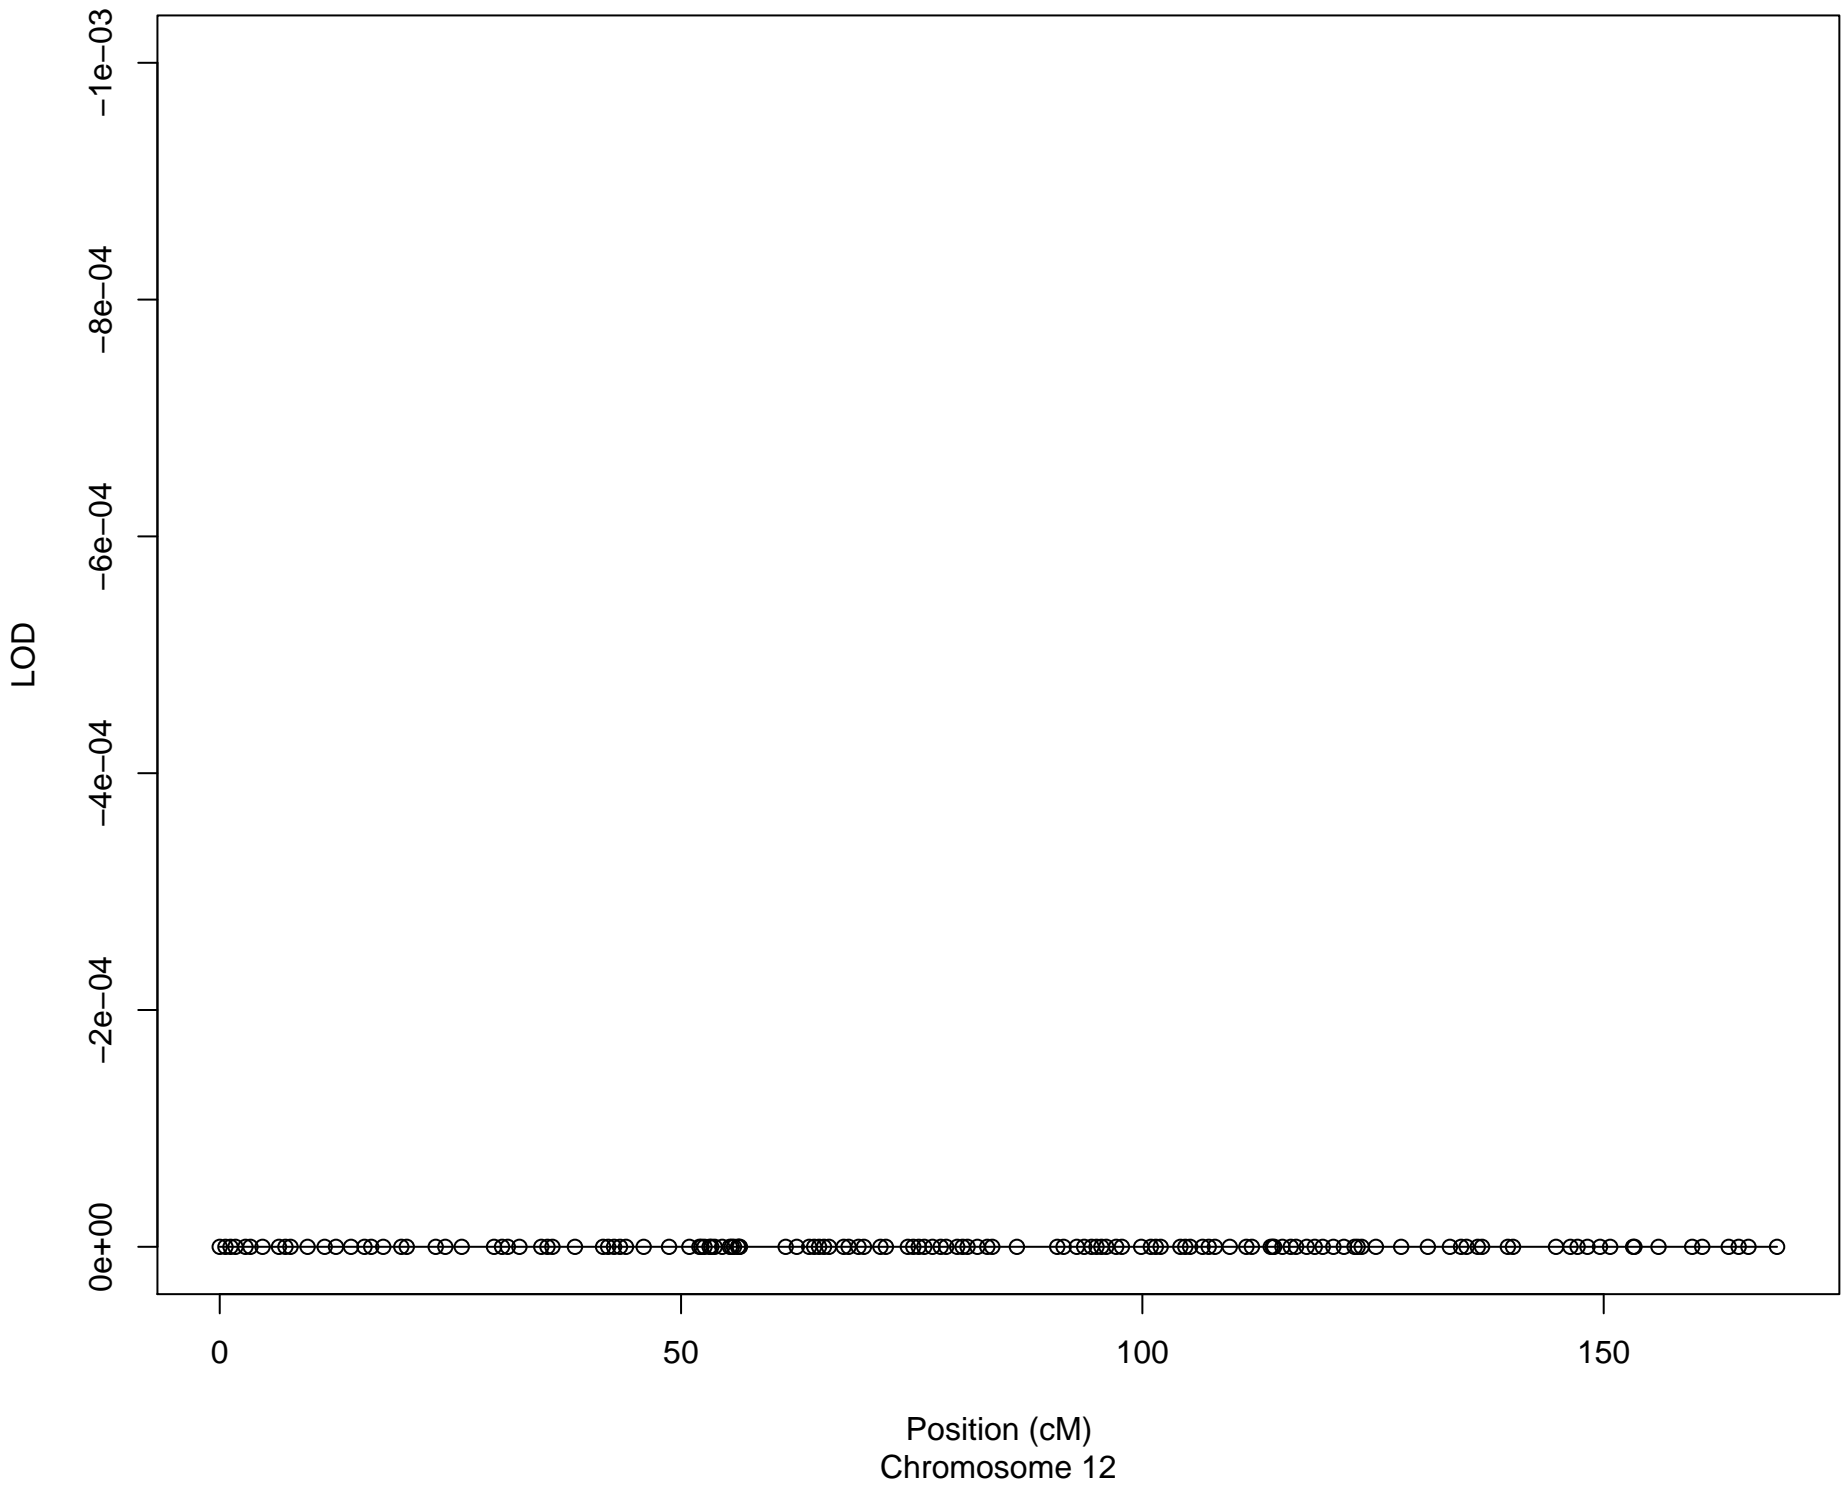

# IC50 (Topotecan) (IC50\_TPT)

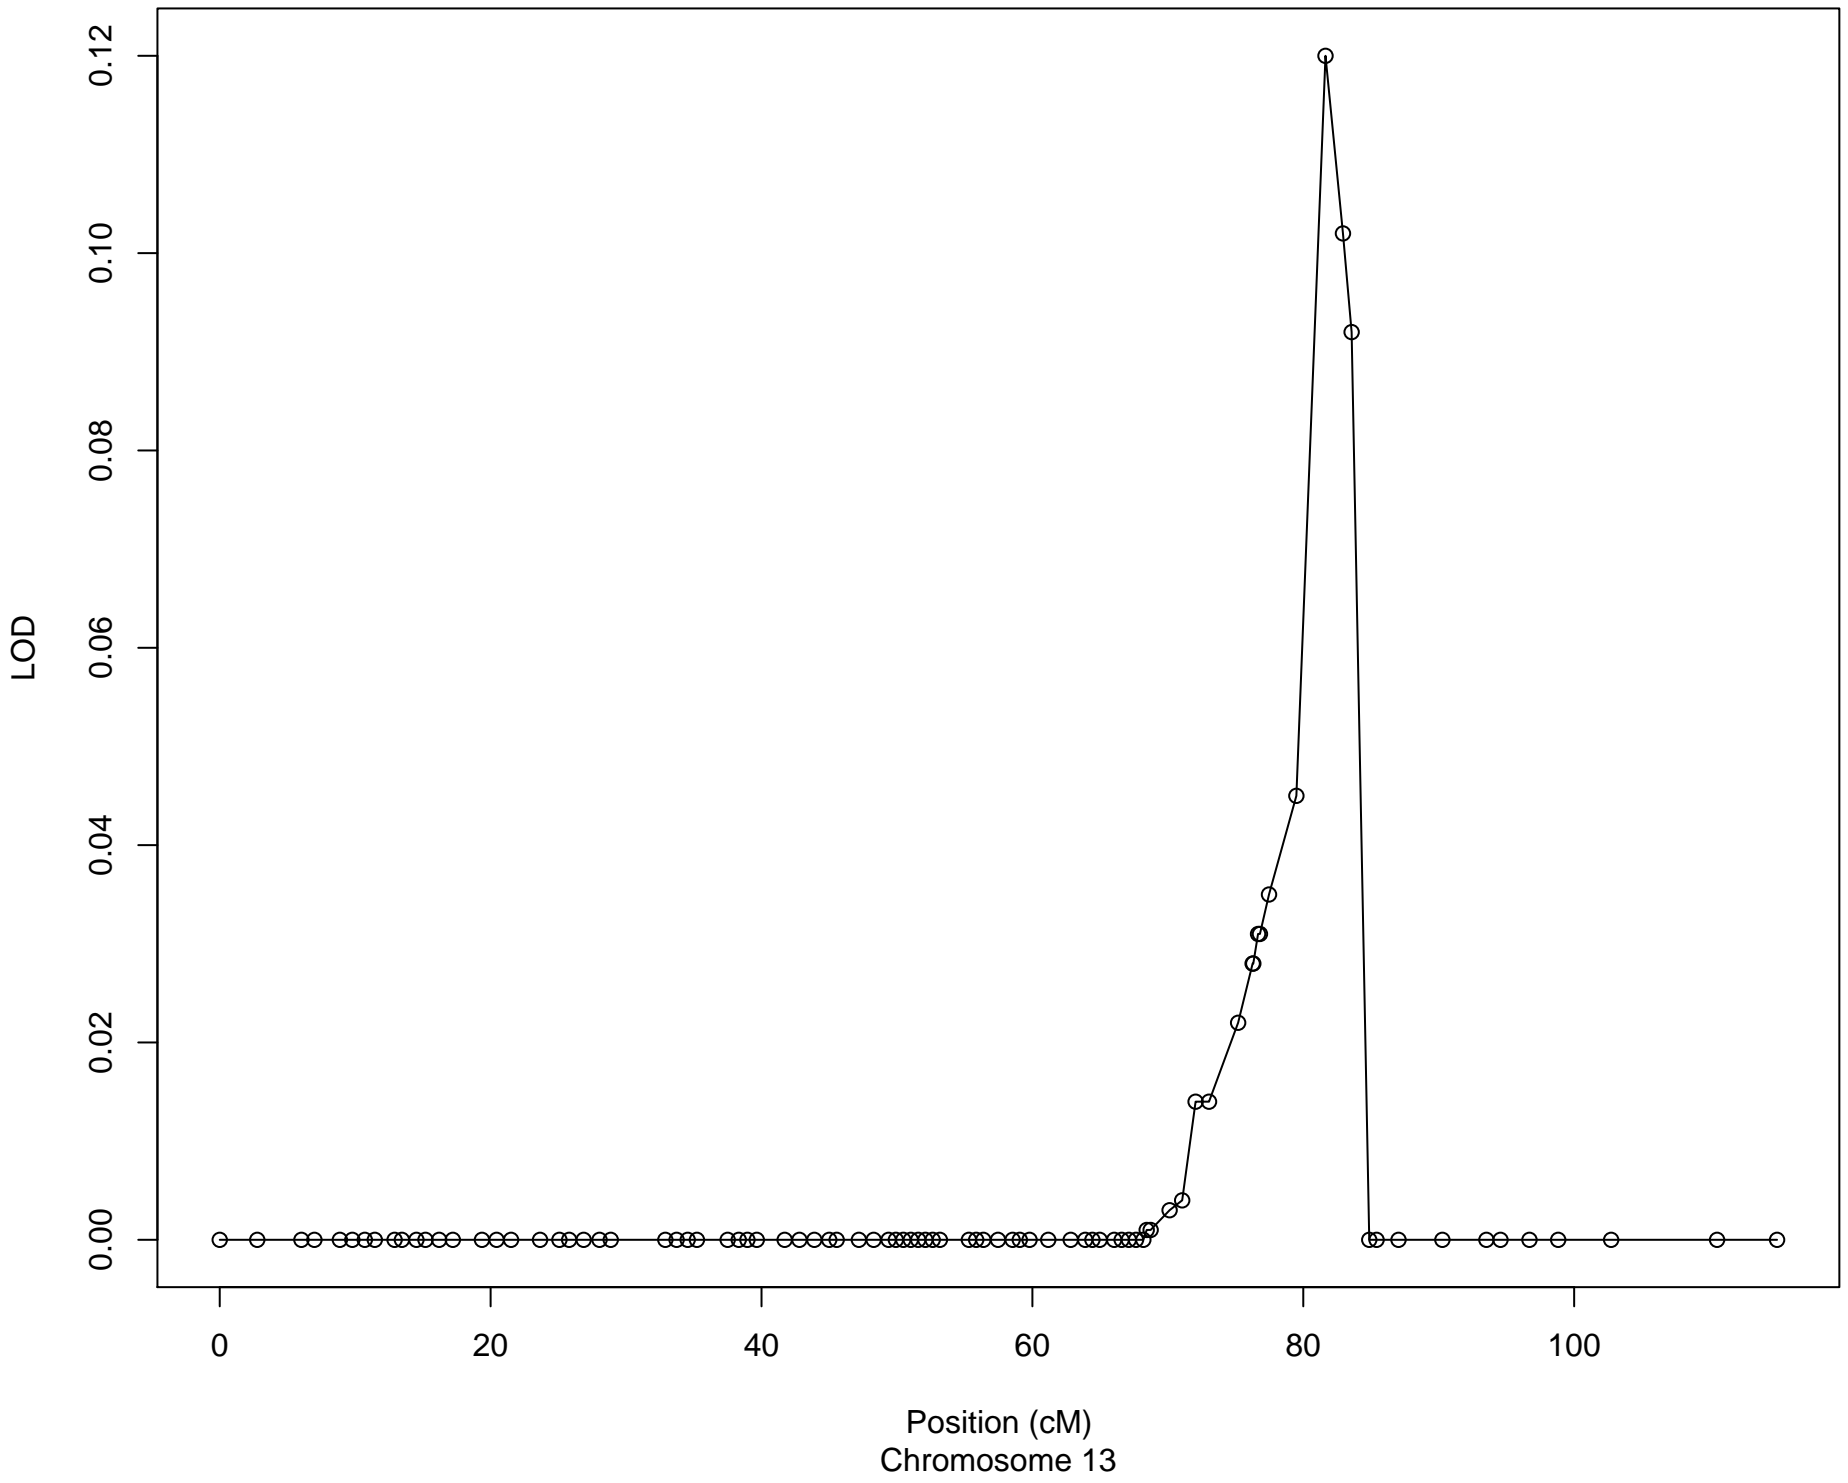

# IC50 (Topotecan) (IC50\_TPT)

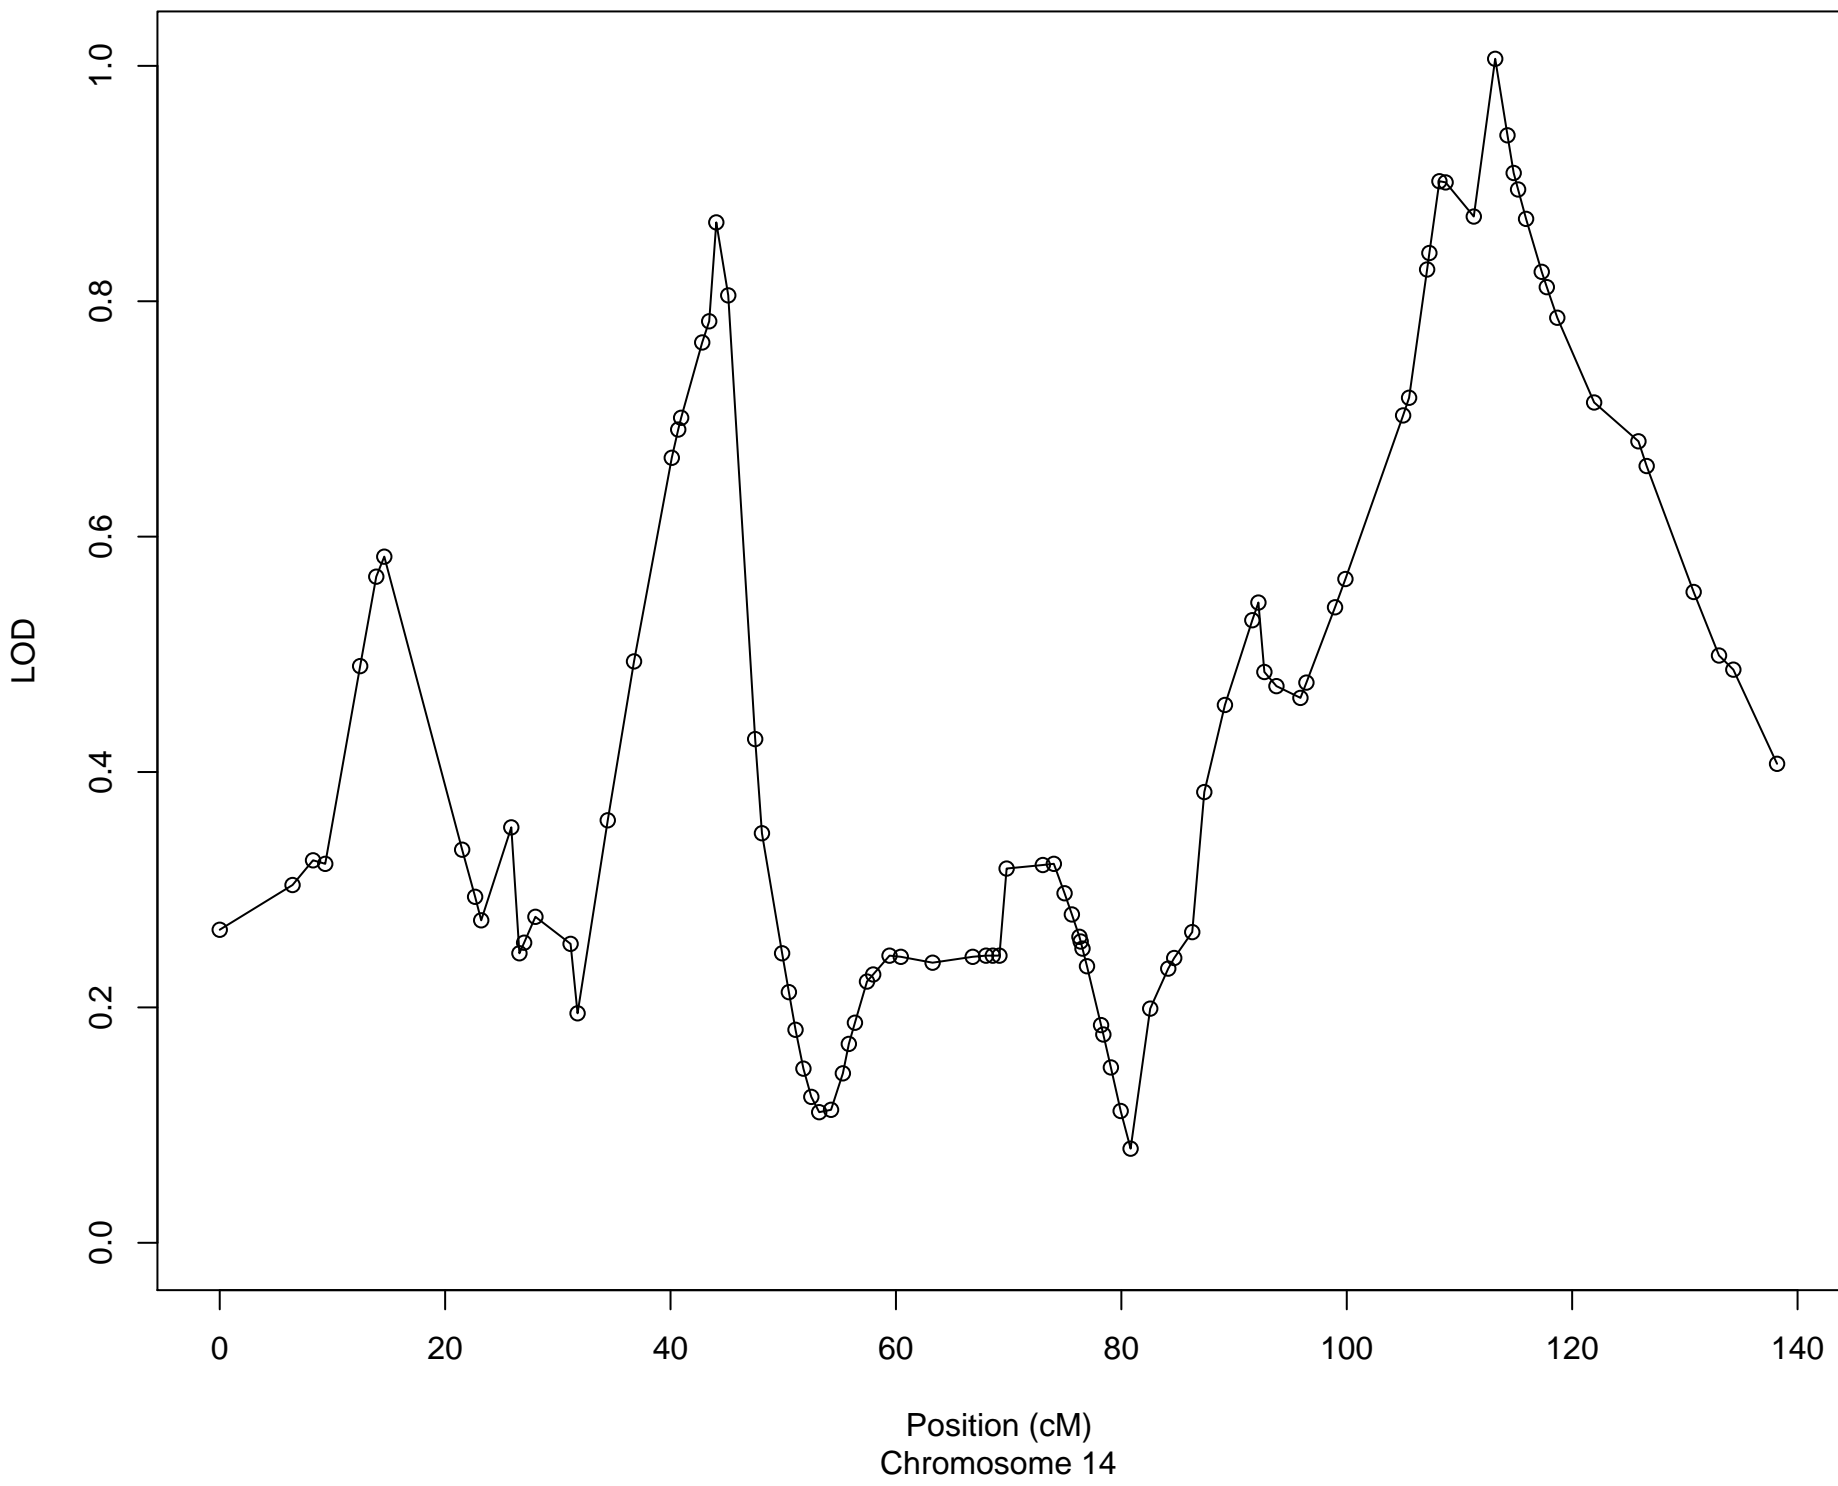

# IC50 (Topotecan) (IC50\_TPT)

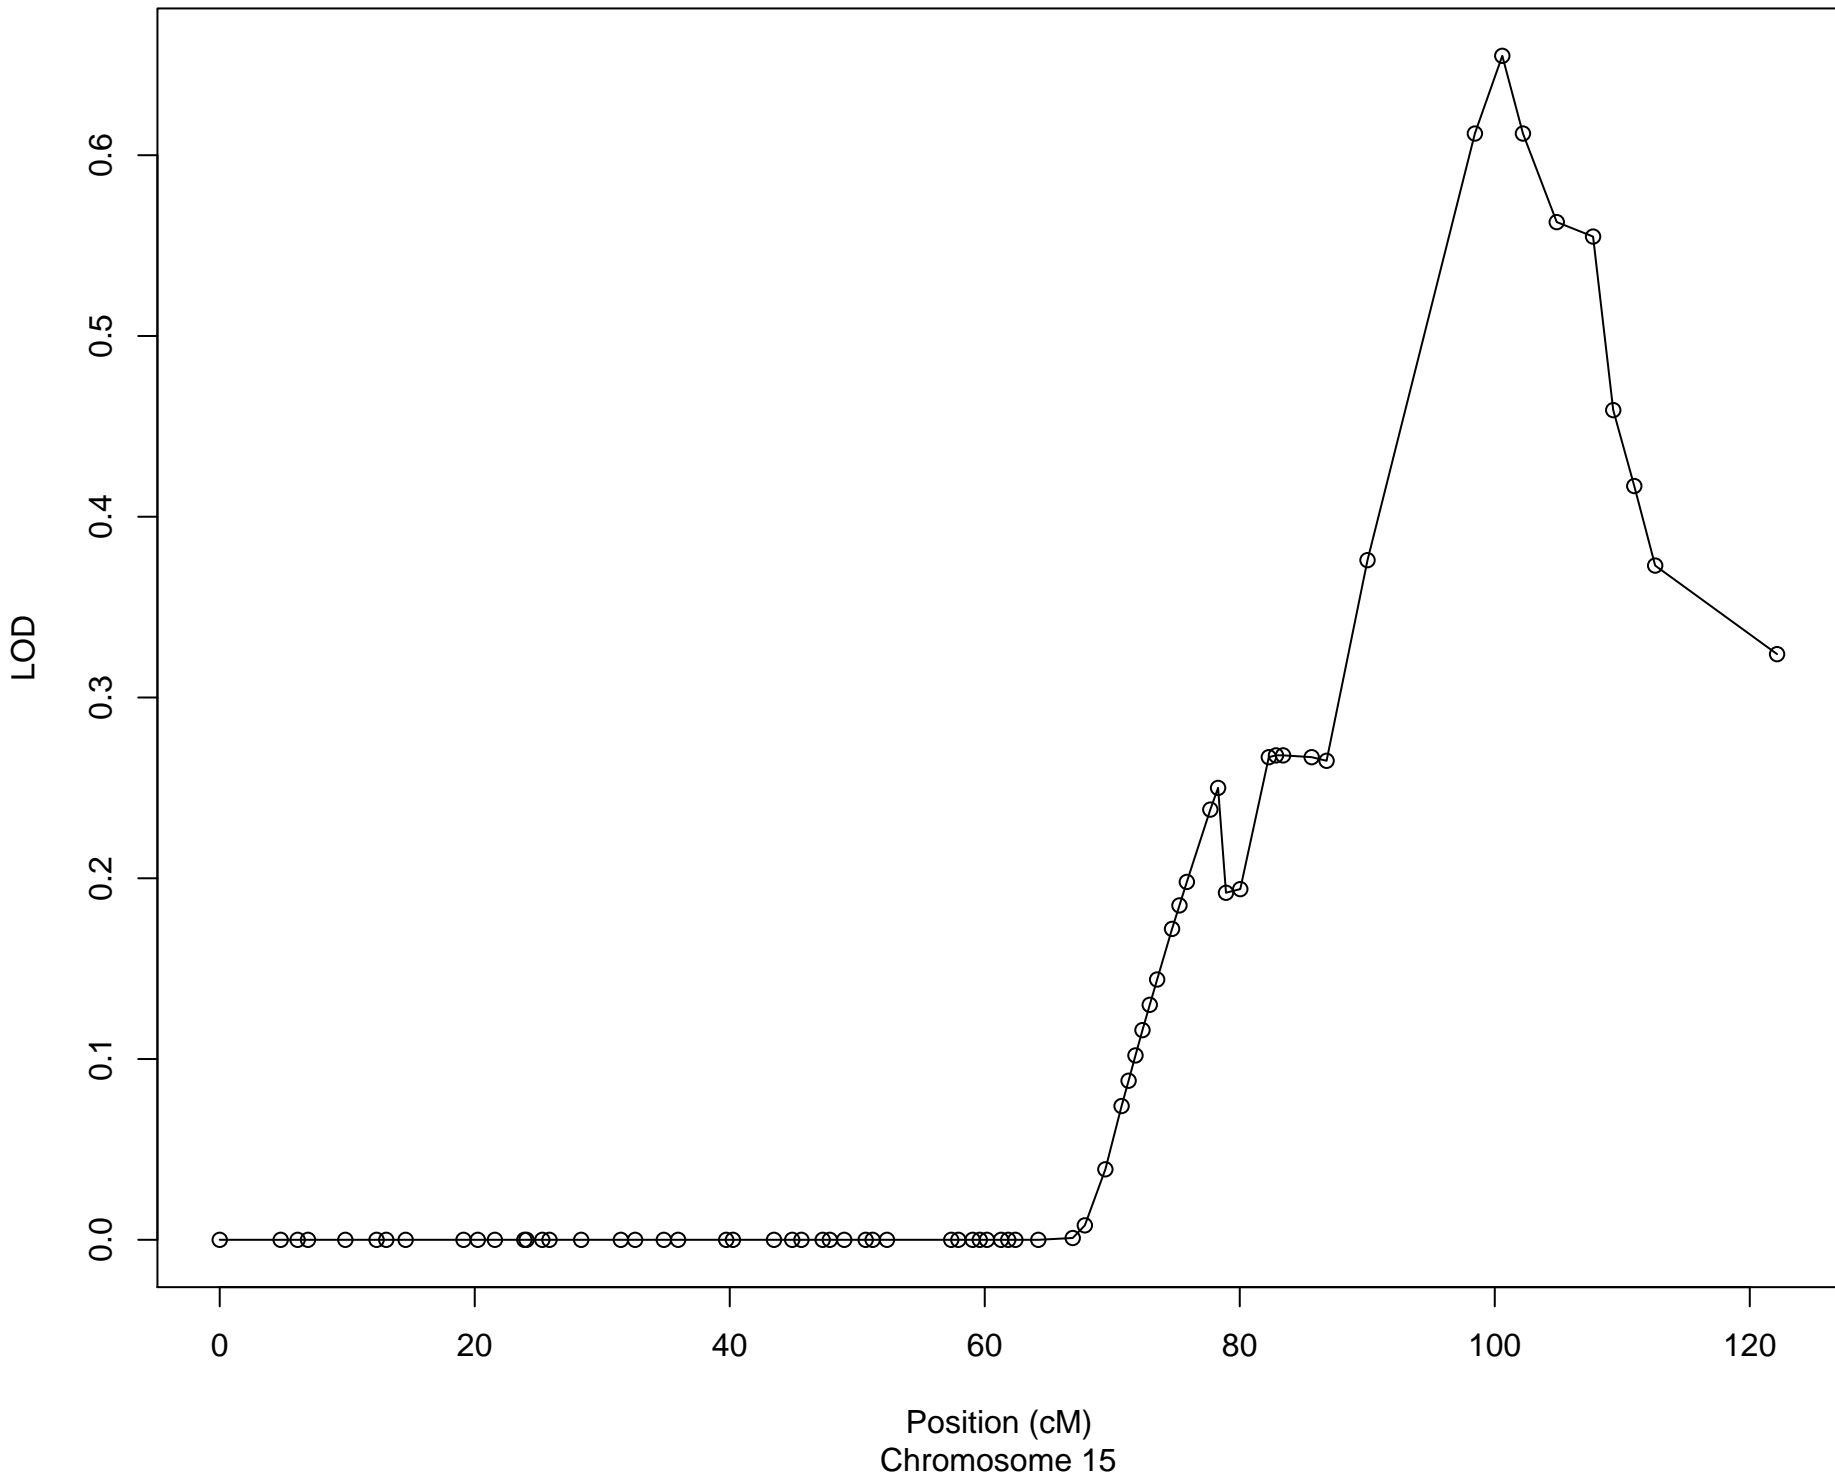

# IC50 (Topotecan) (IC50\_TPT)

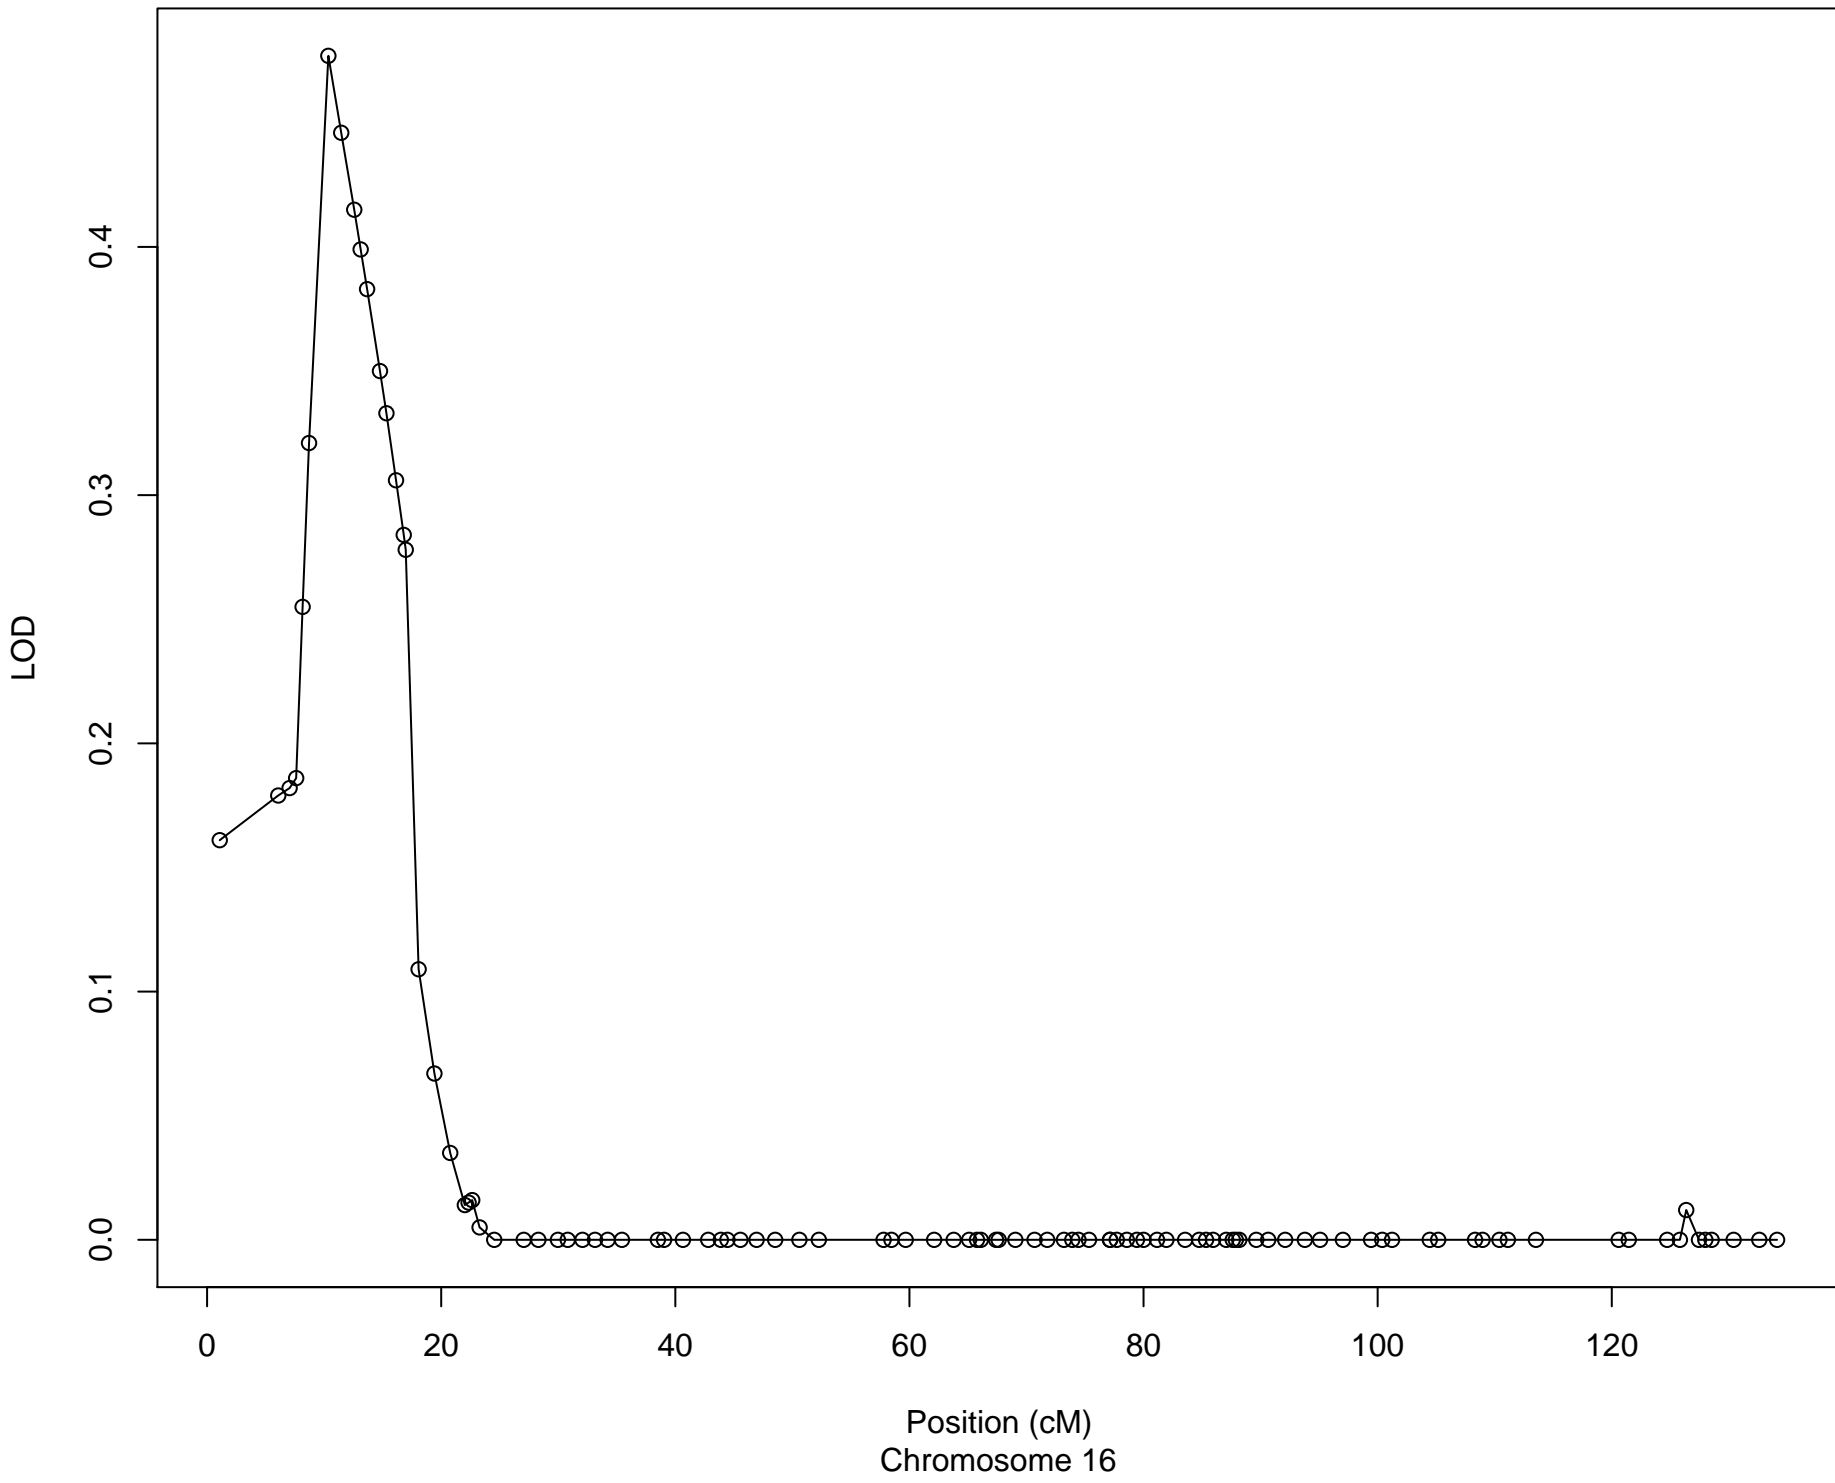

# IC50 (Topotecan) (IC50\_TPT)

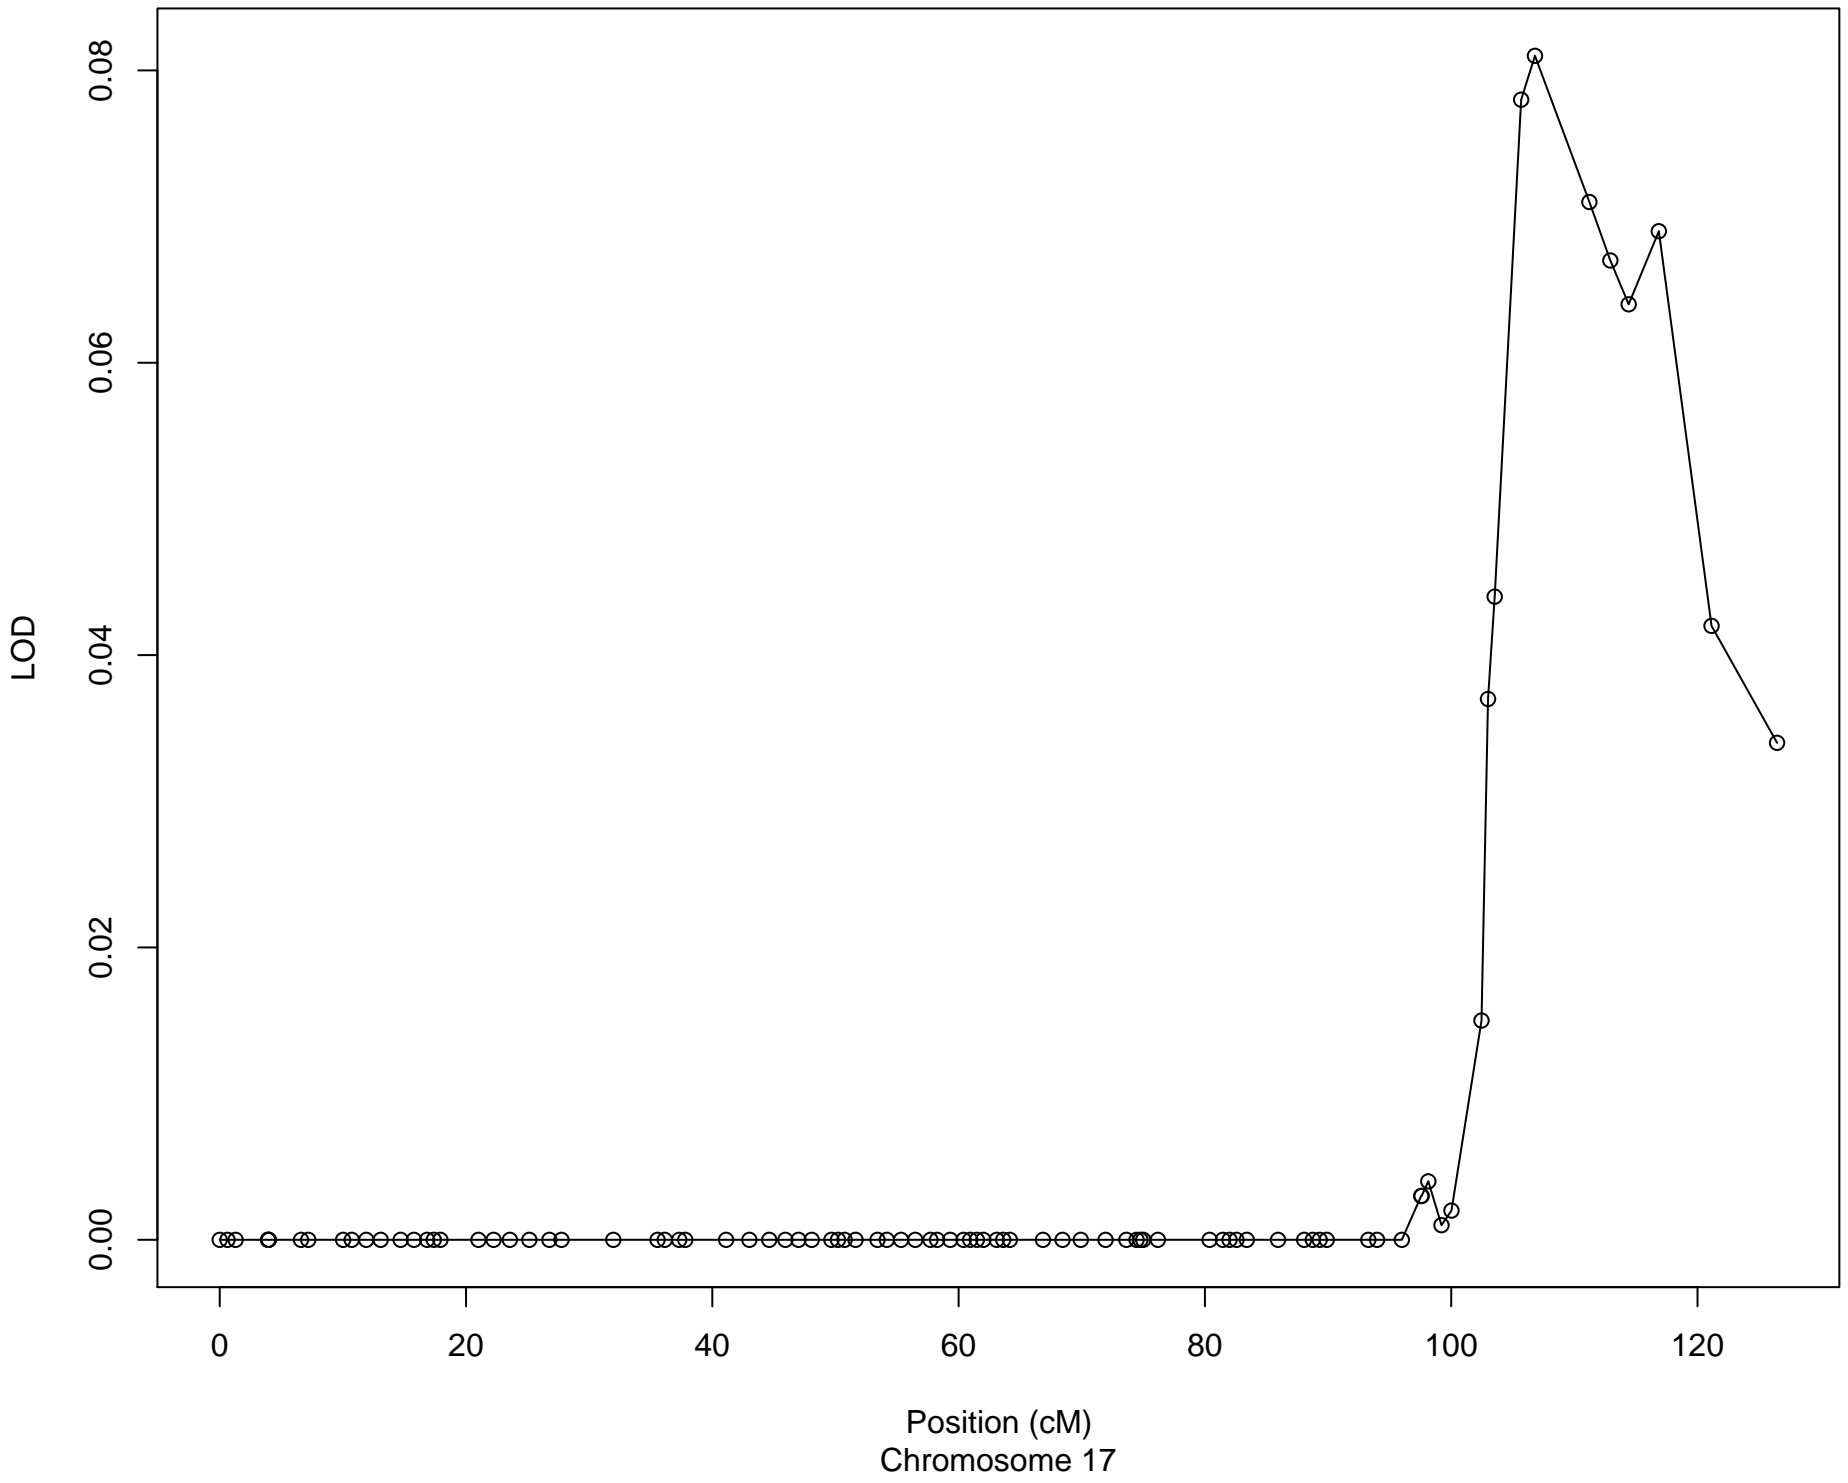

# IC50 (Topotecan) (IC50\_TPT)

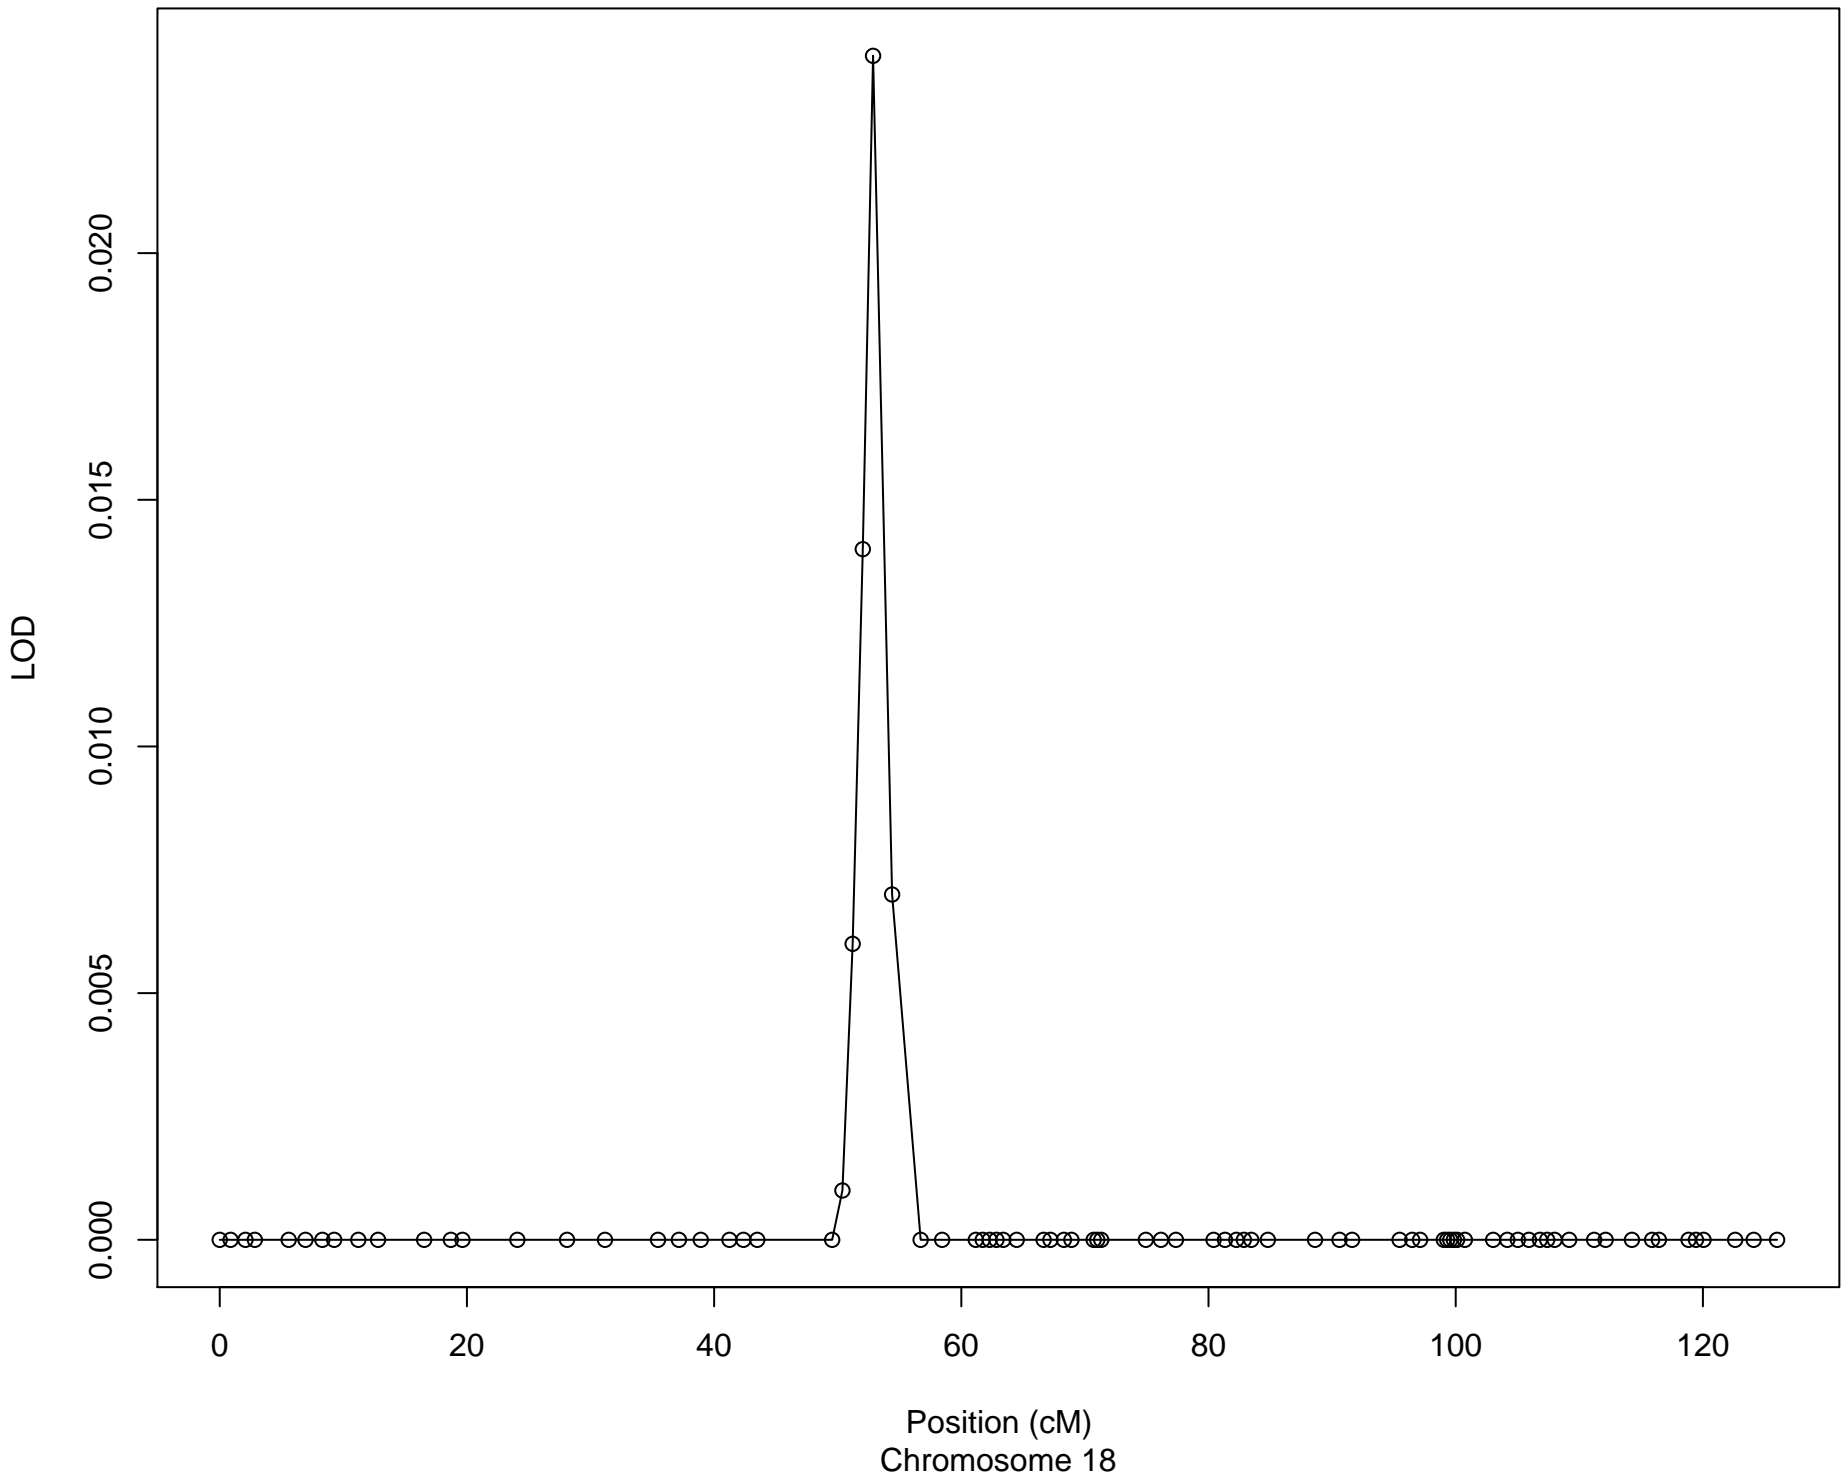



# IC50 (Topotecan) (IC50\_TPT)

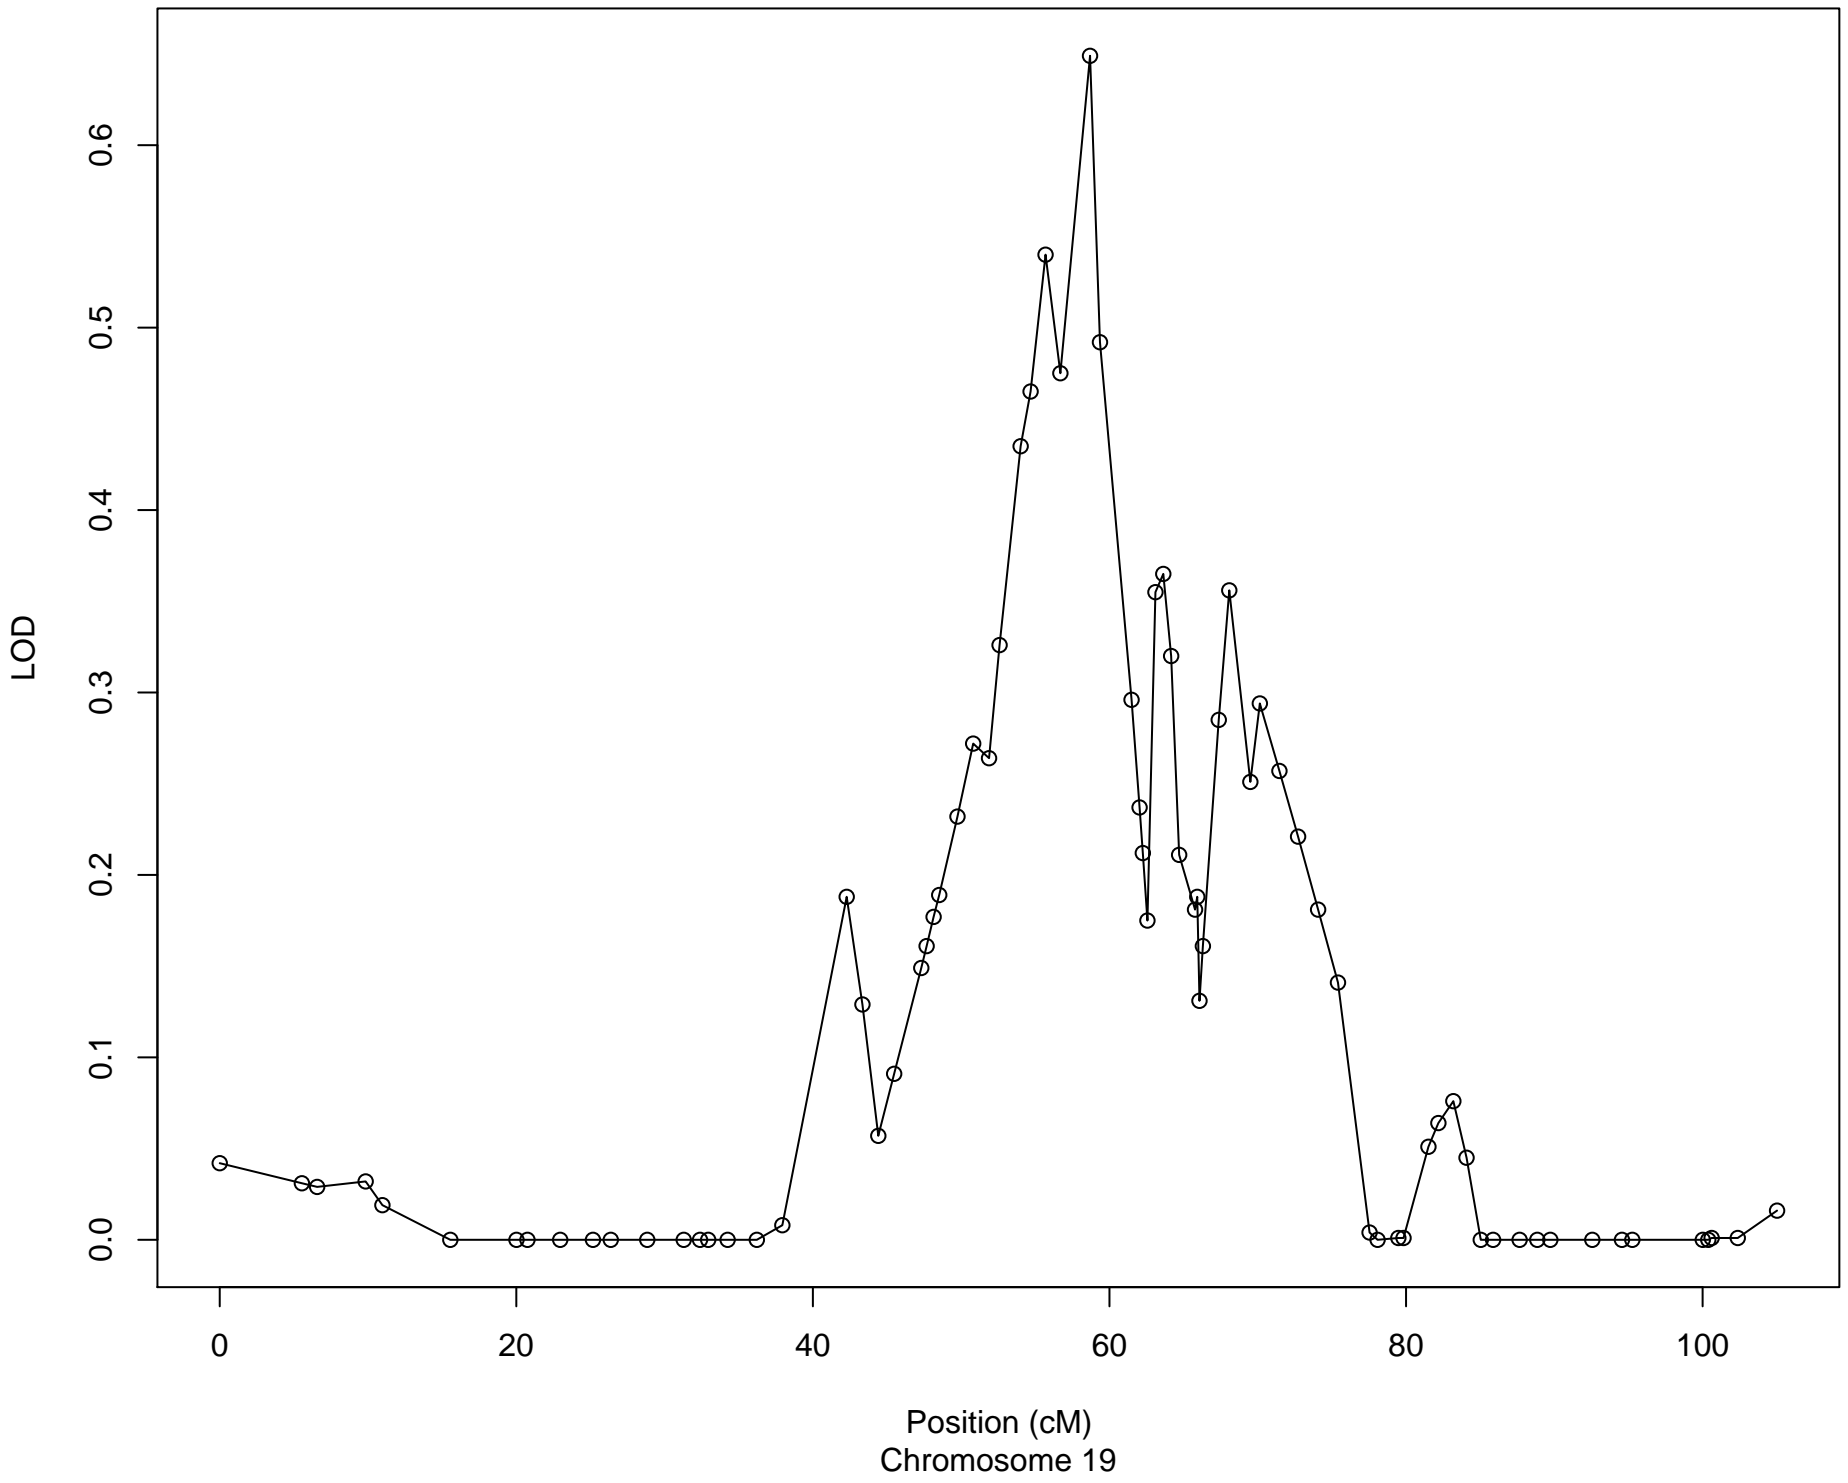

# IC50 (Topotecan) (IC50\_TPT)

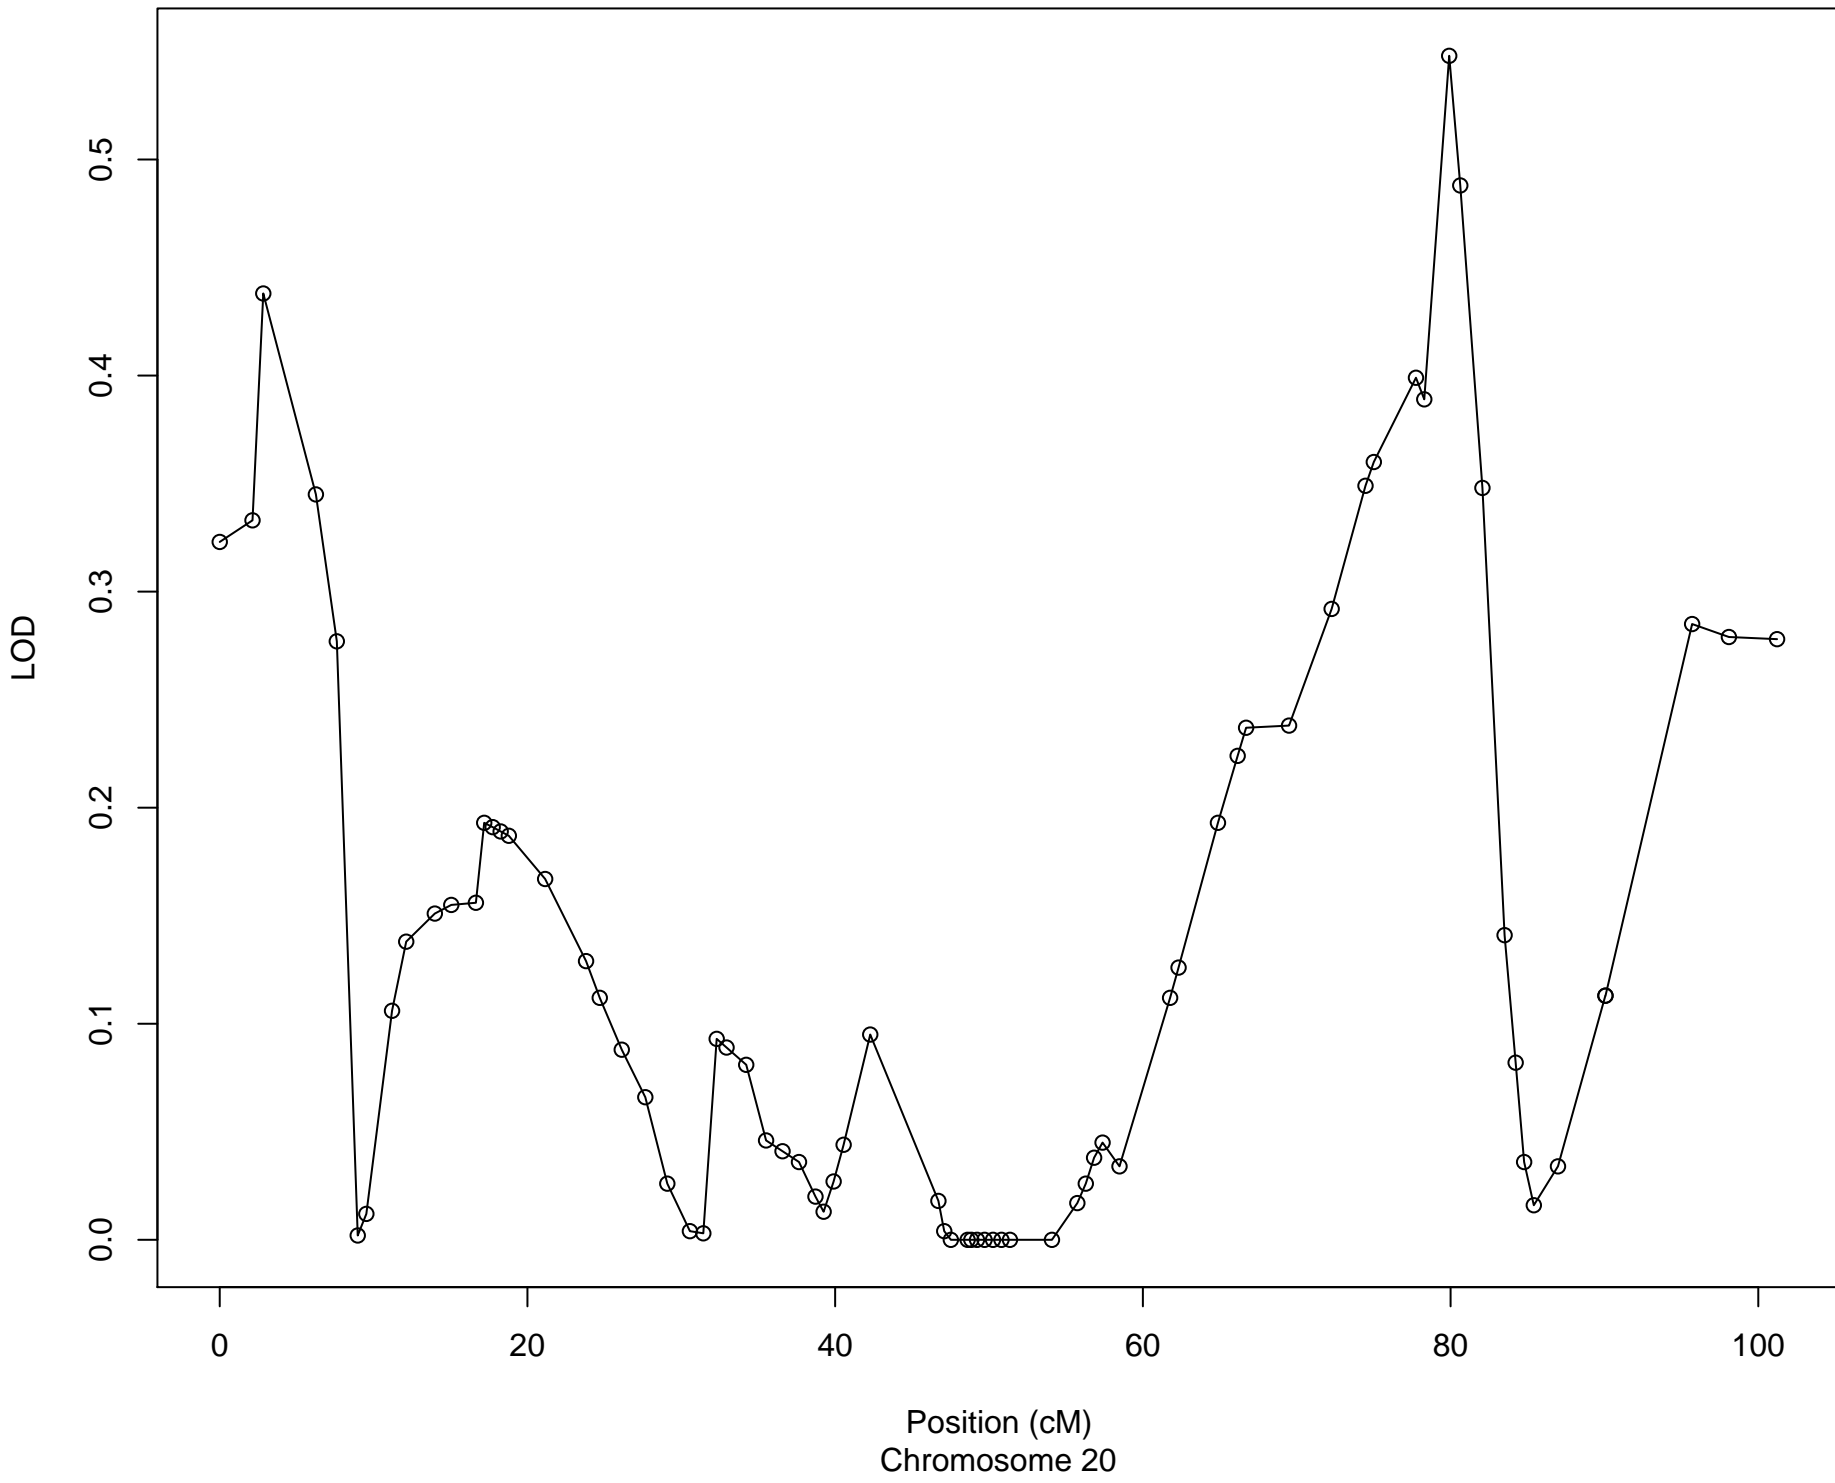

# IC50 (Topotecan) (IC50\_TPT)

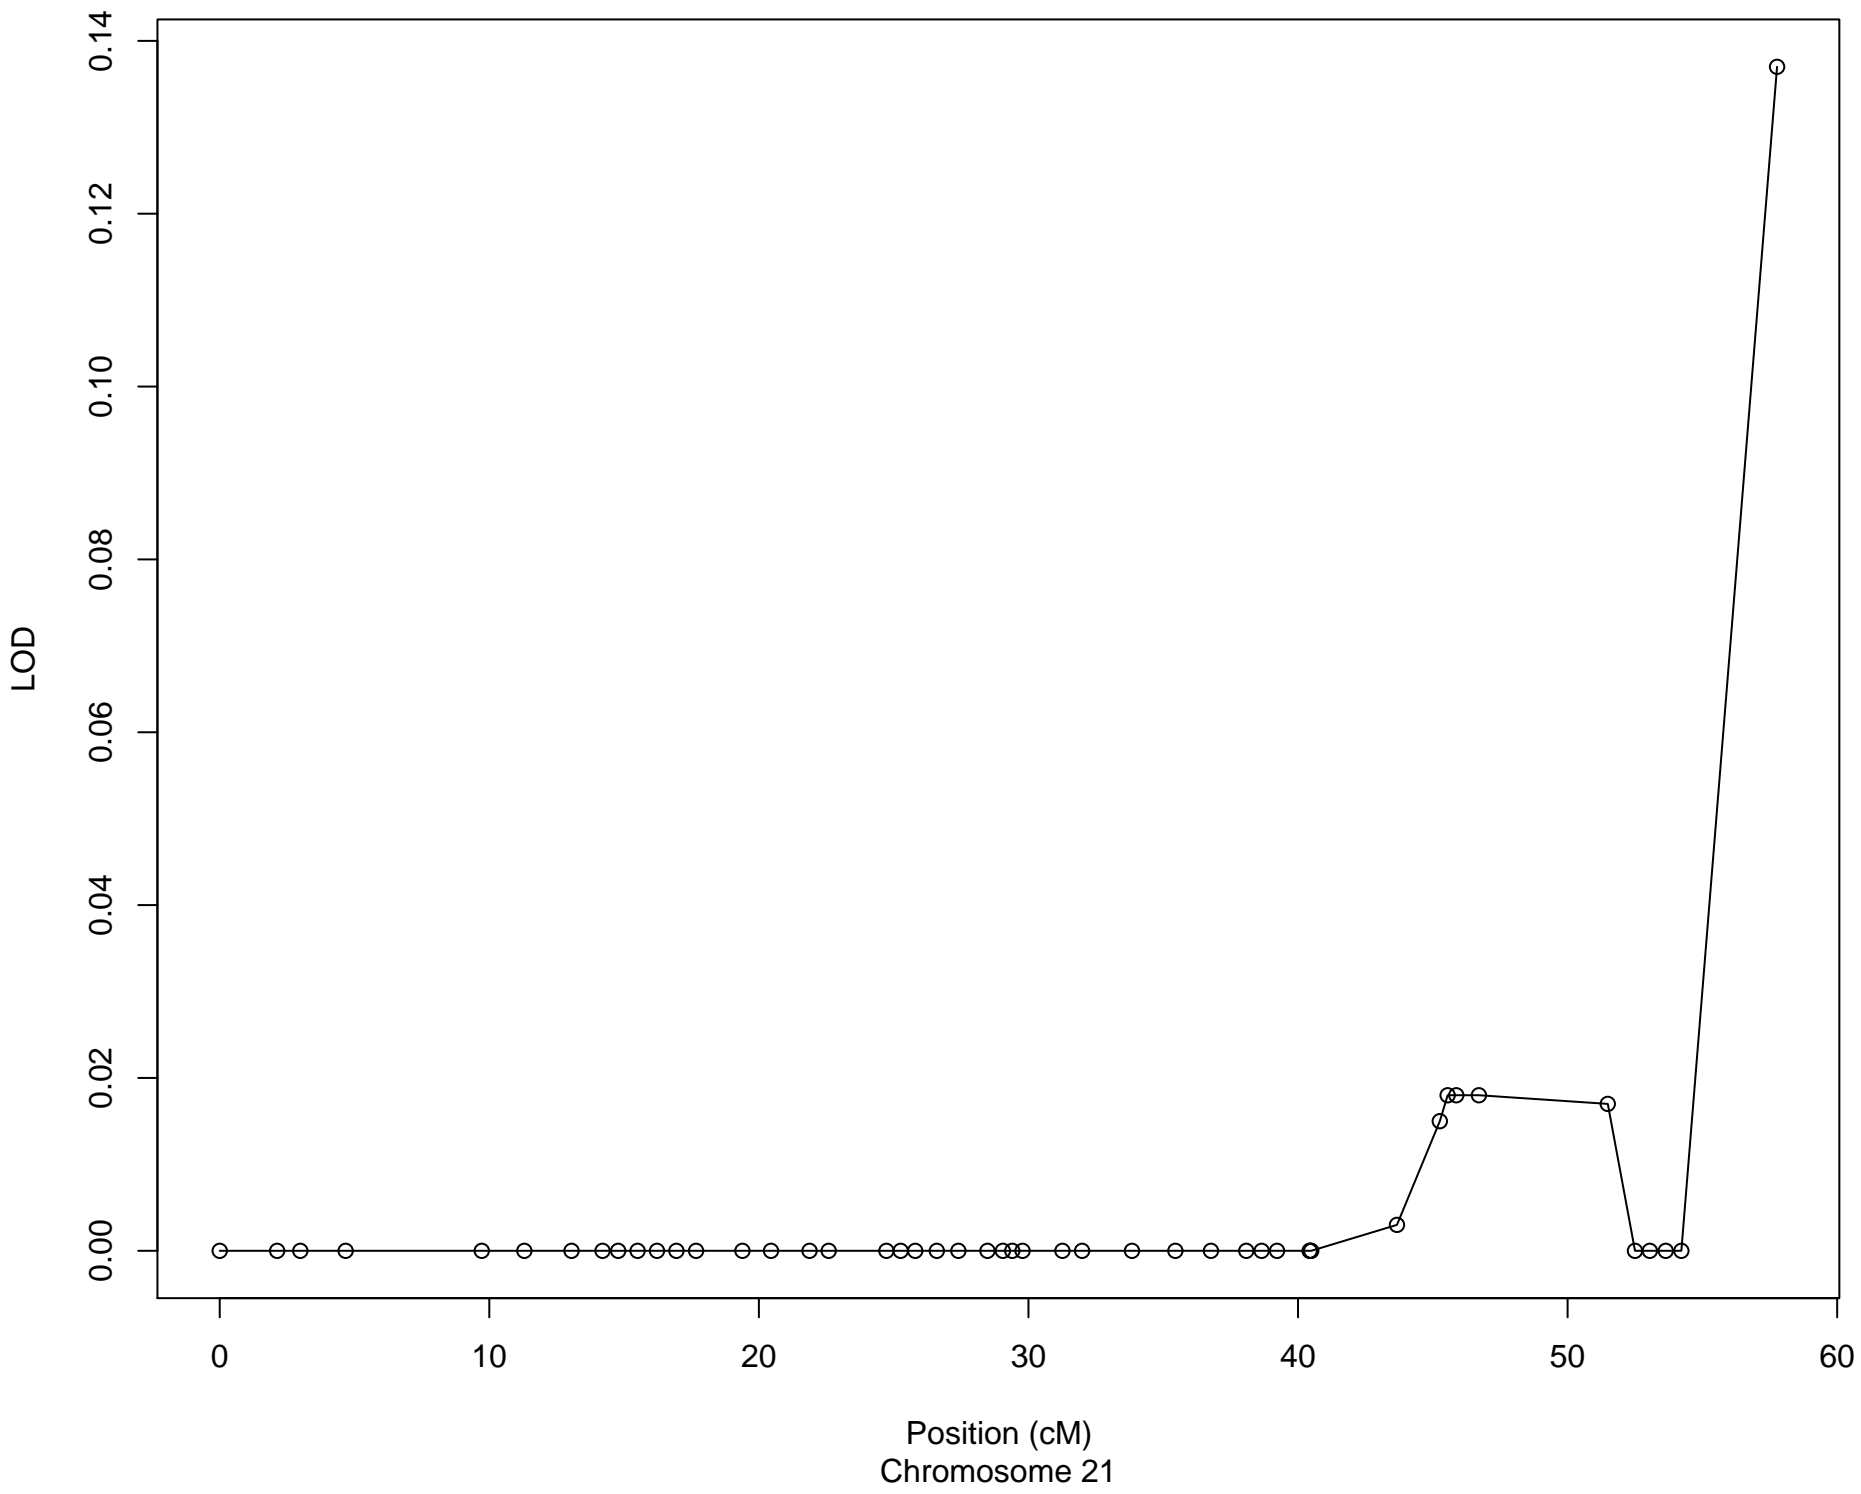

# IC50 (Topotecan) (IC50\_TPT)

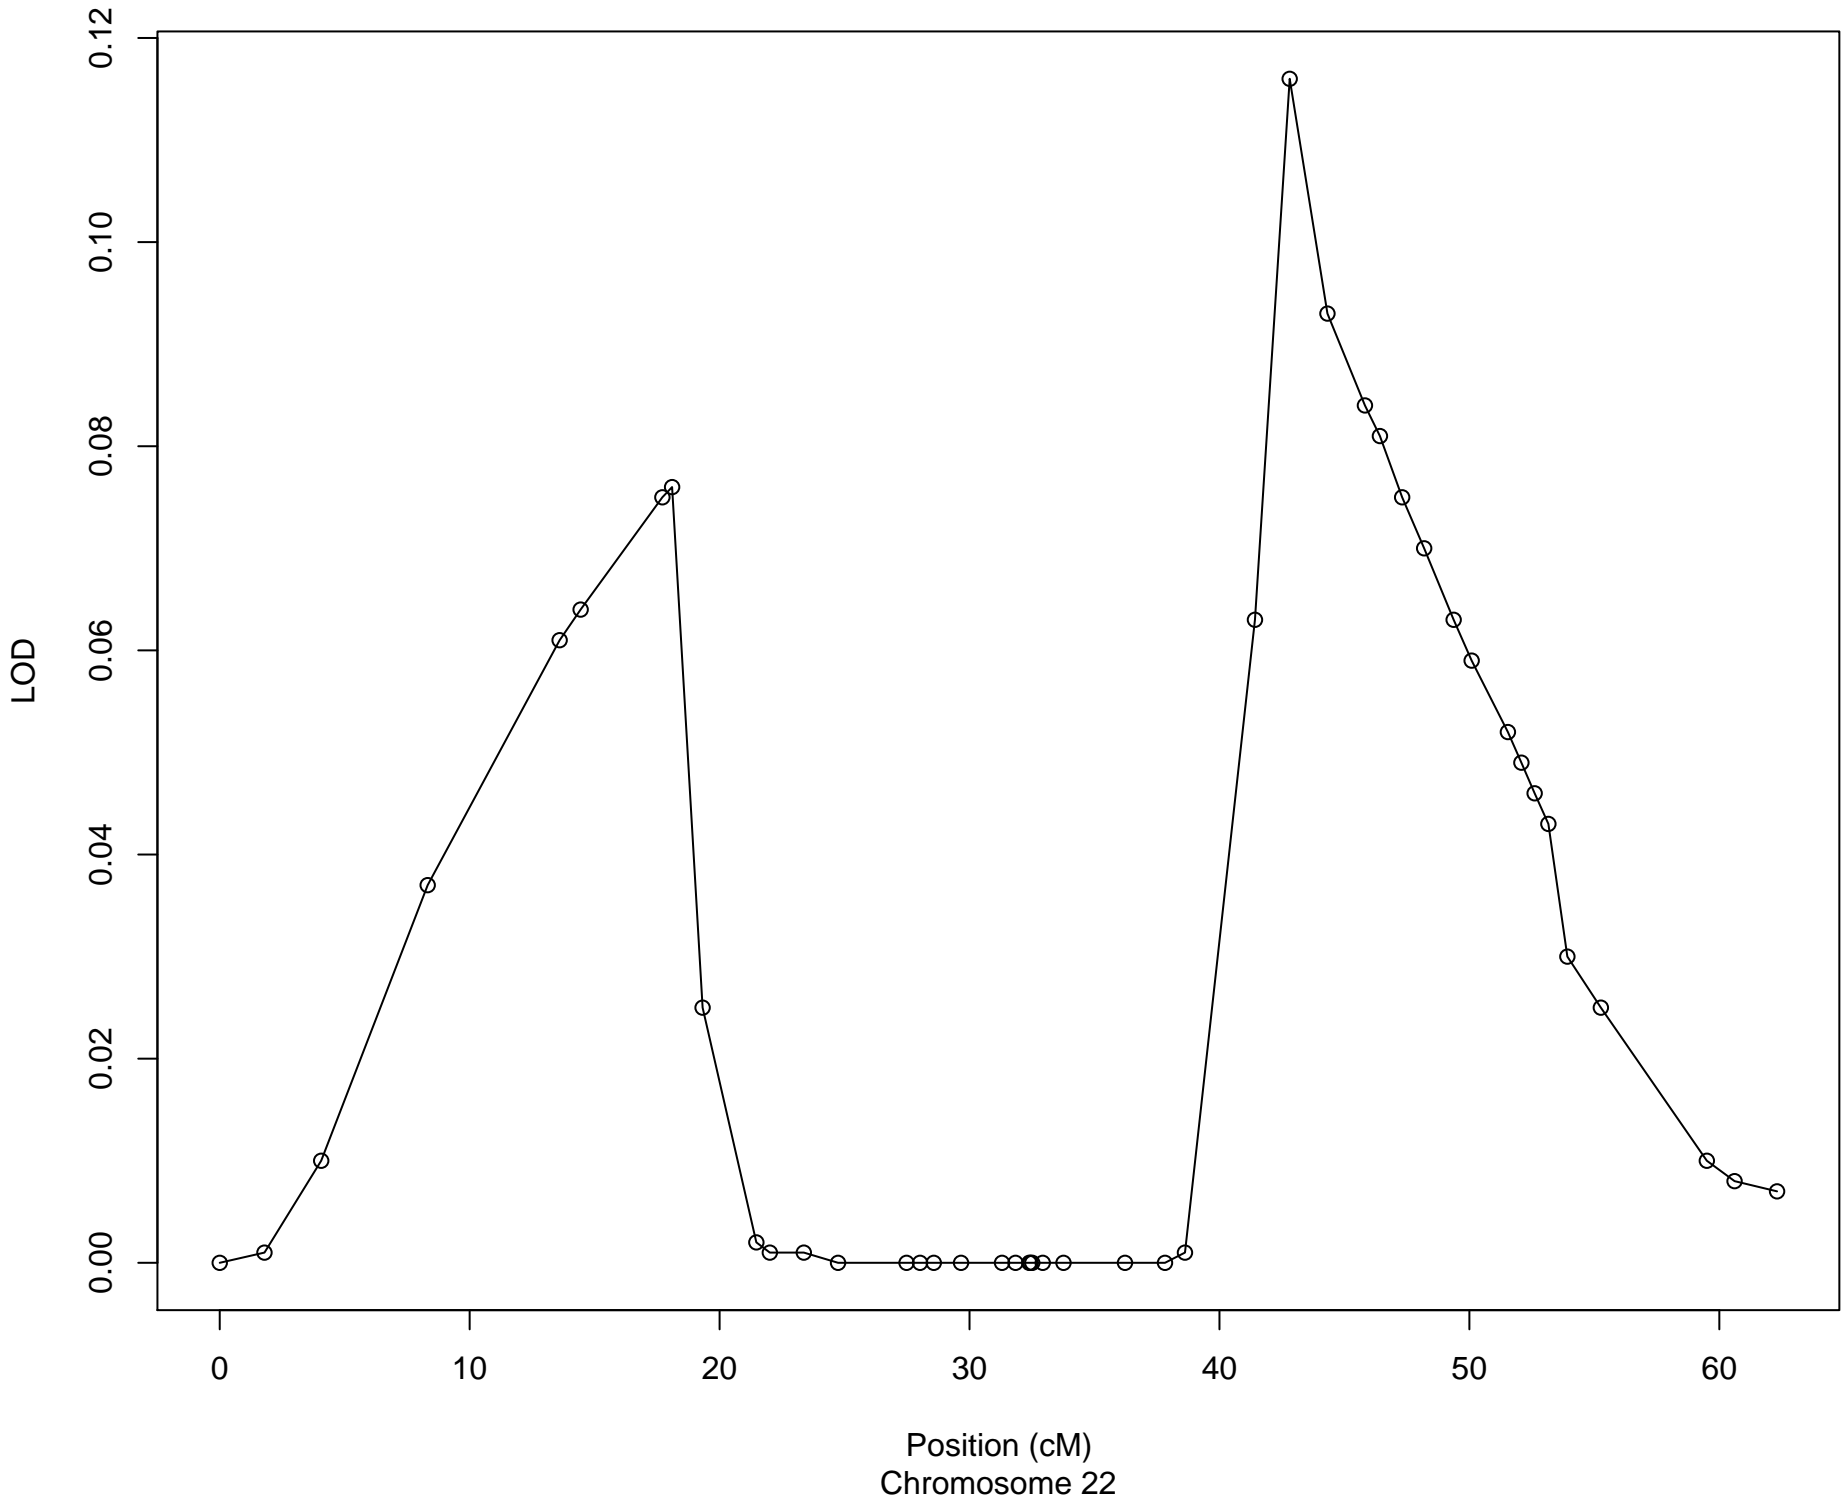

# Irinotecan (CPT11)

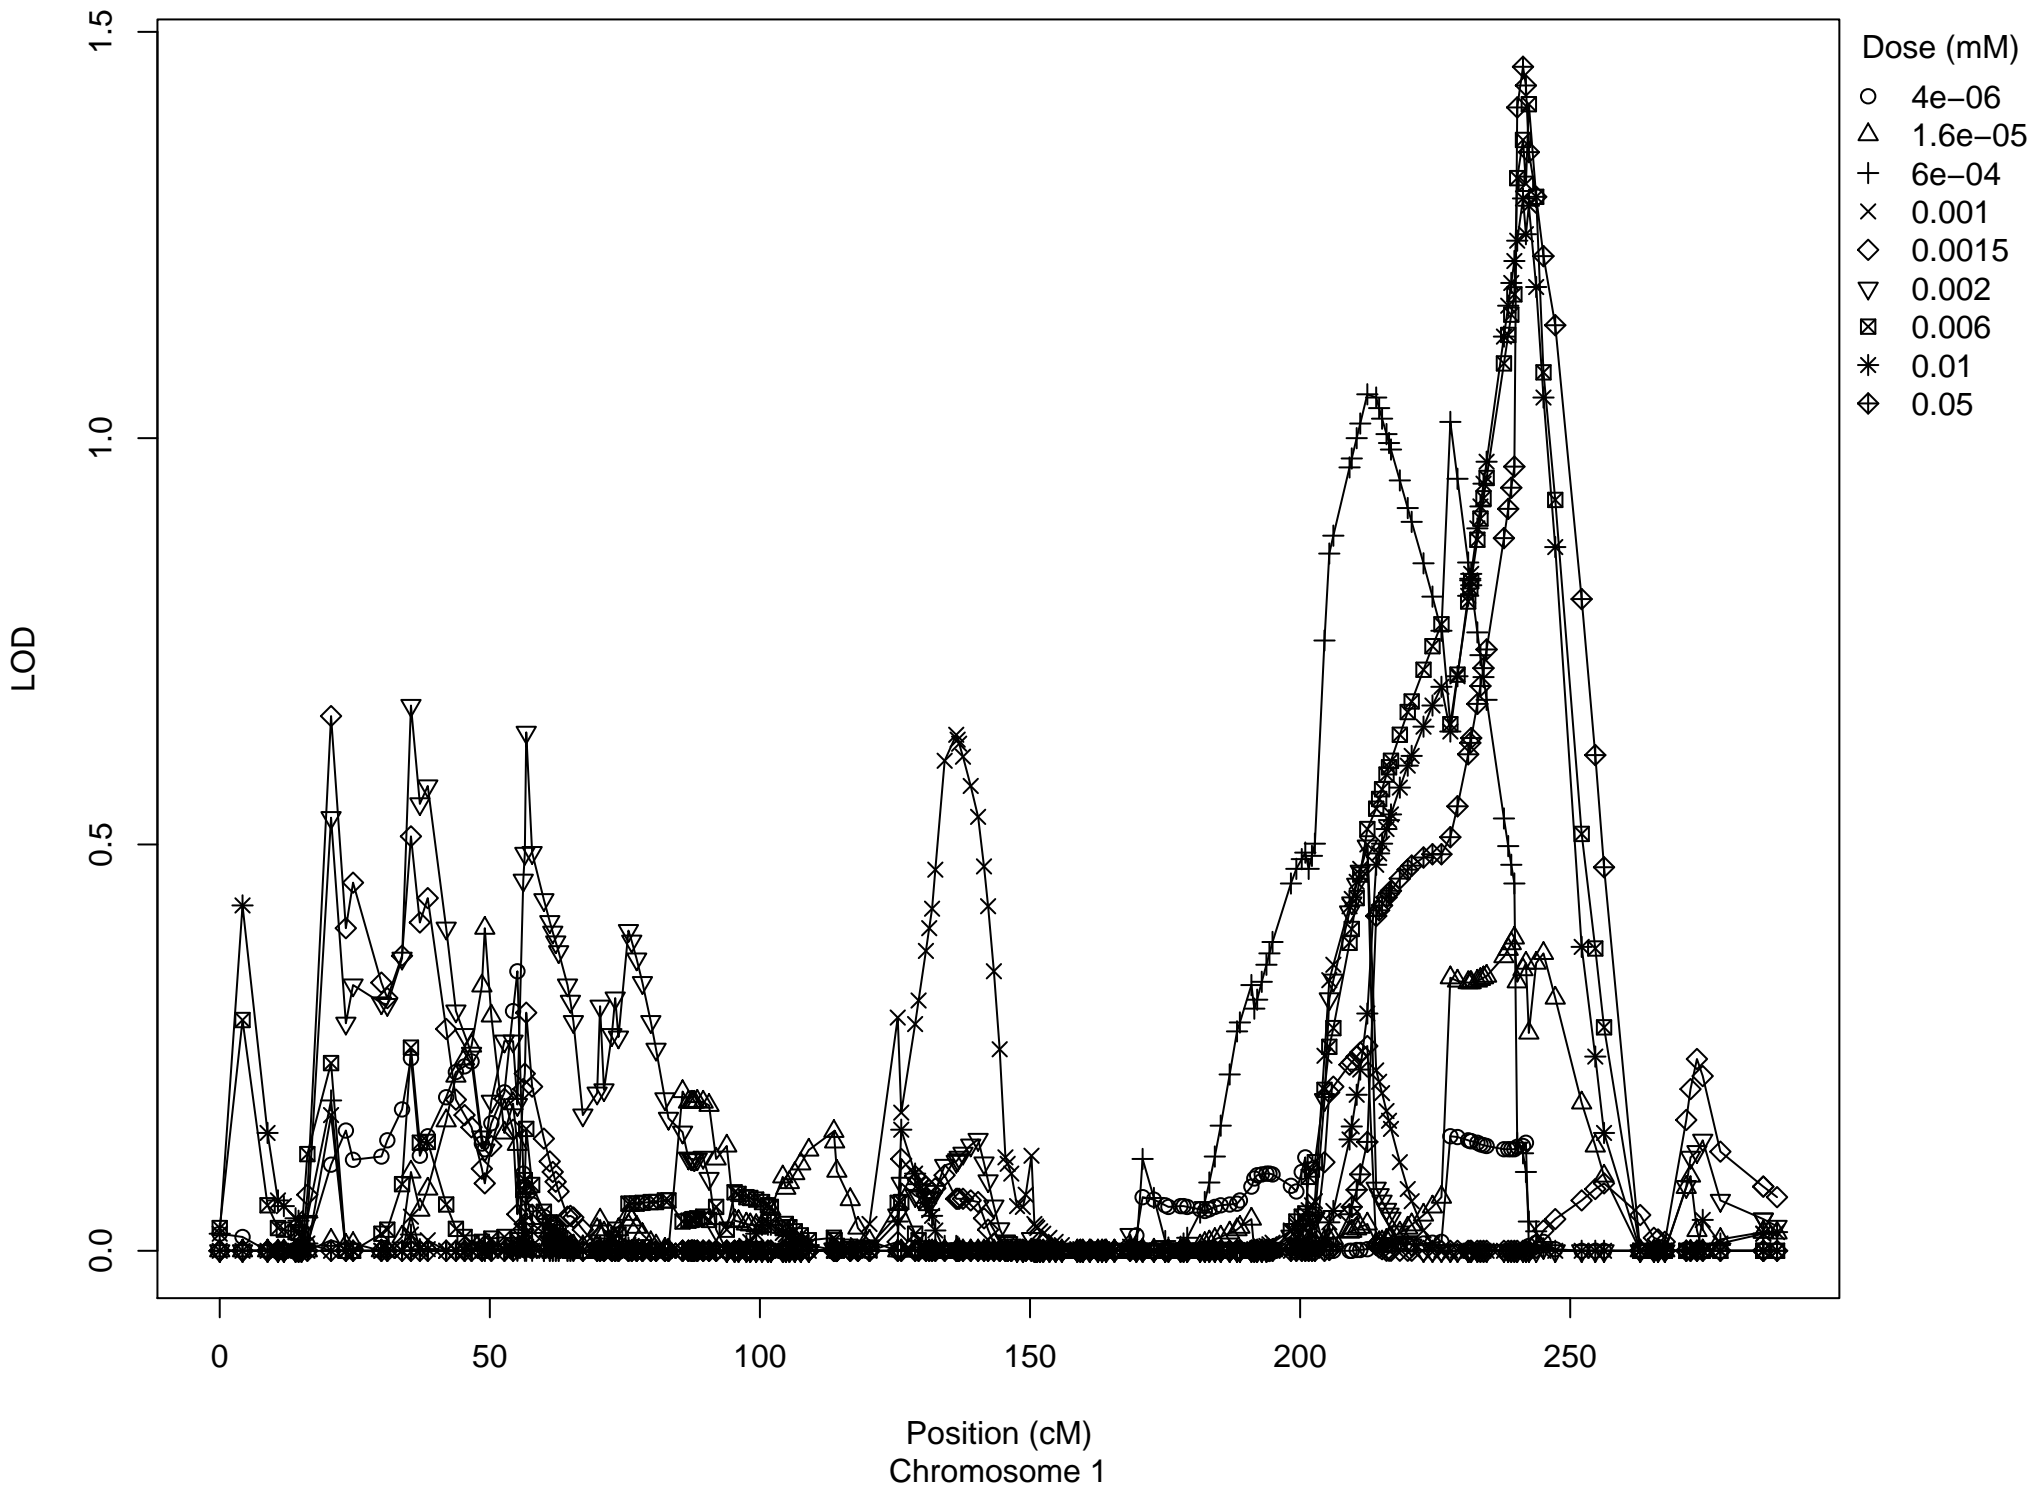

# Irinotecan (CPT11)

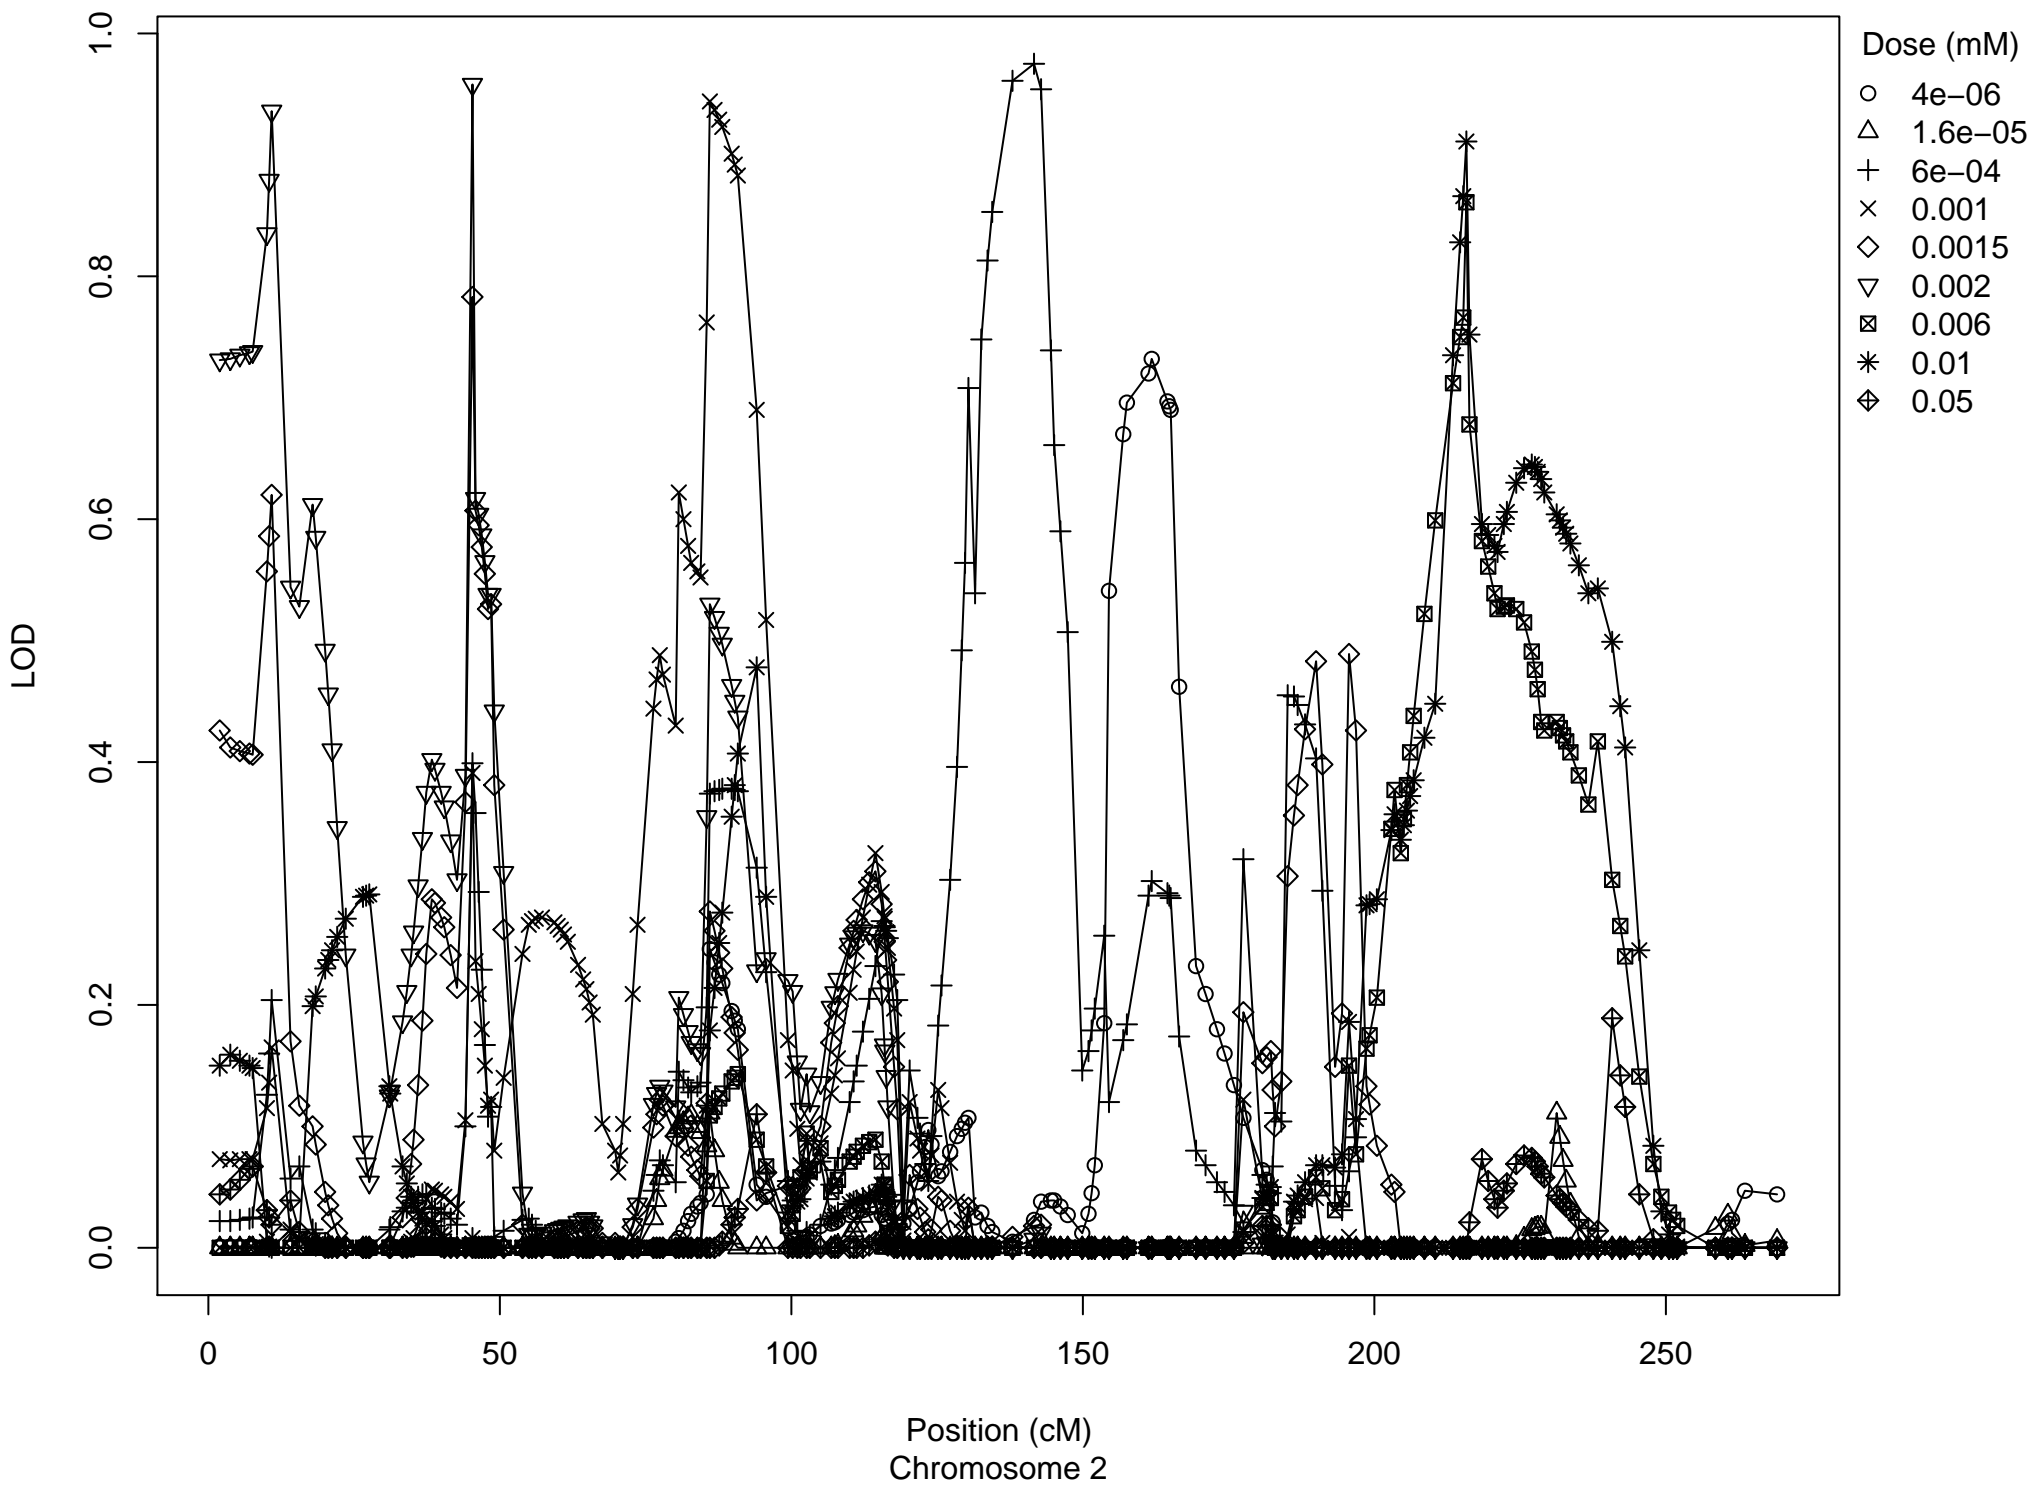

# Irinotecan (CPT11)

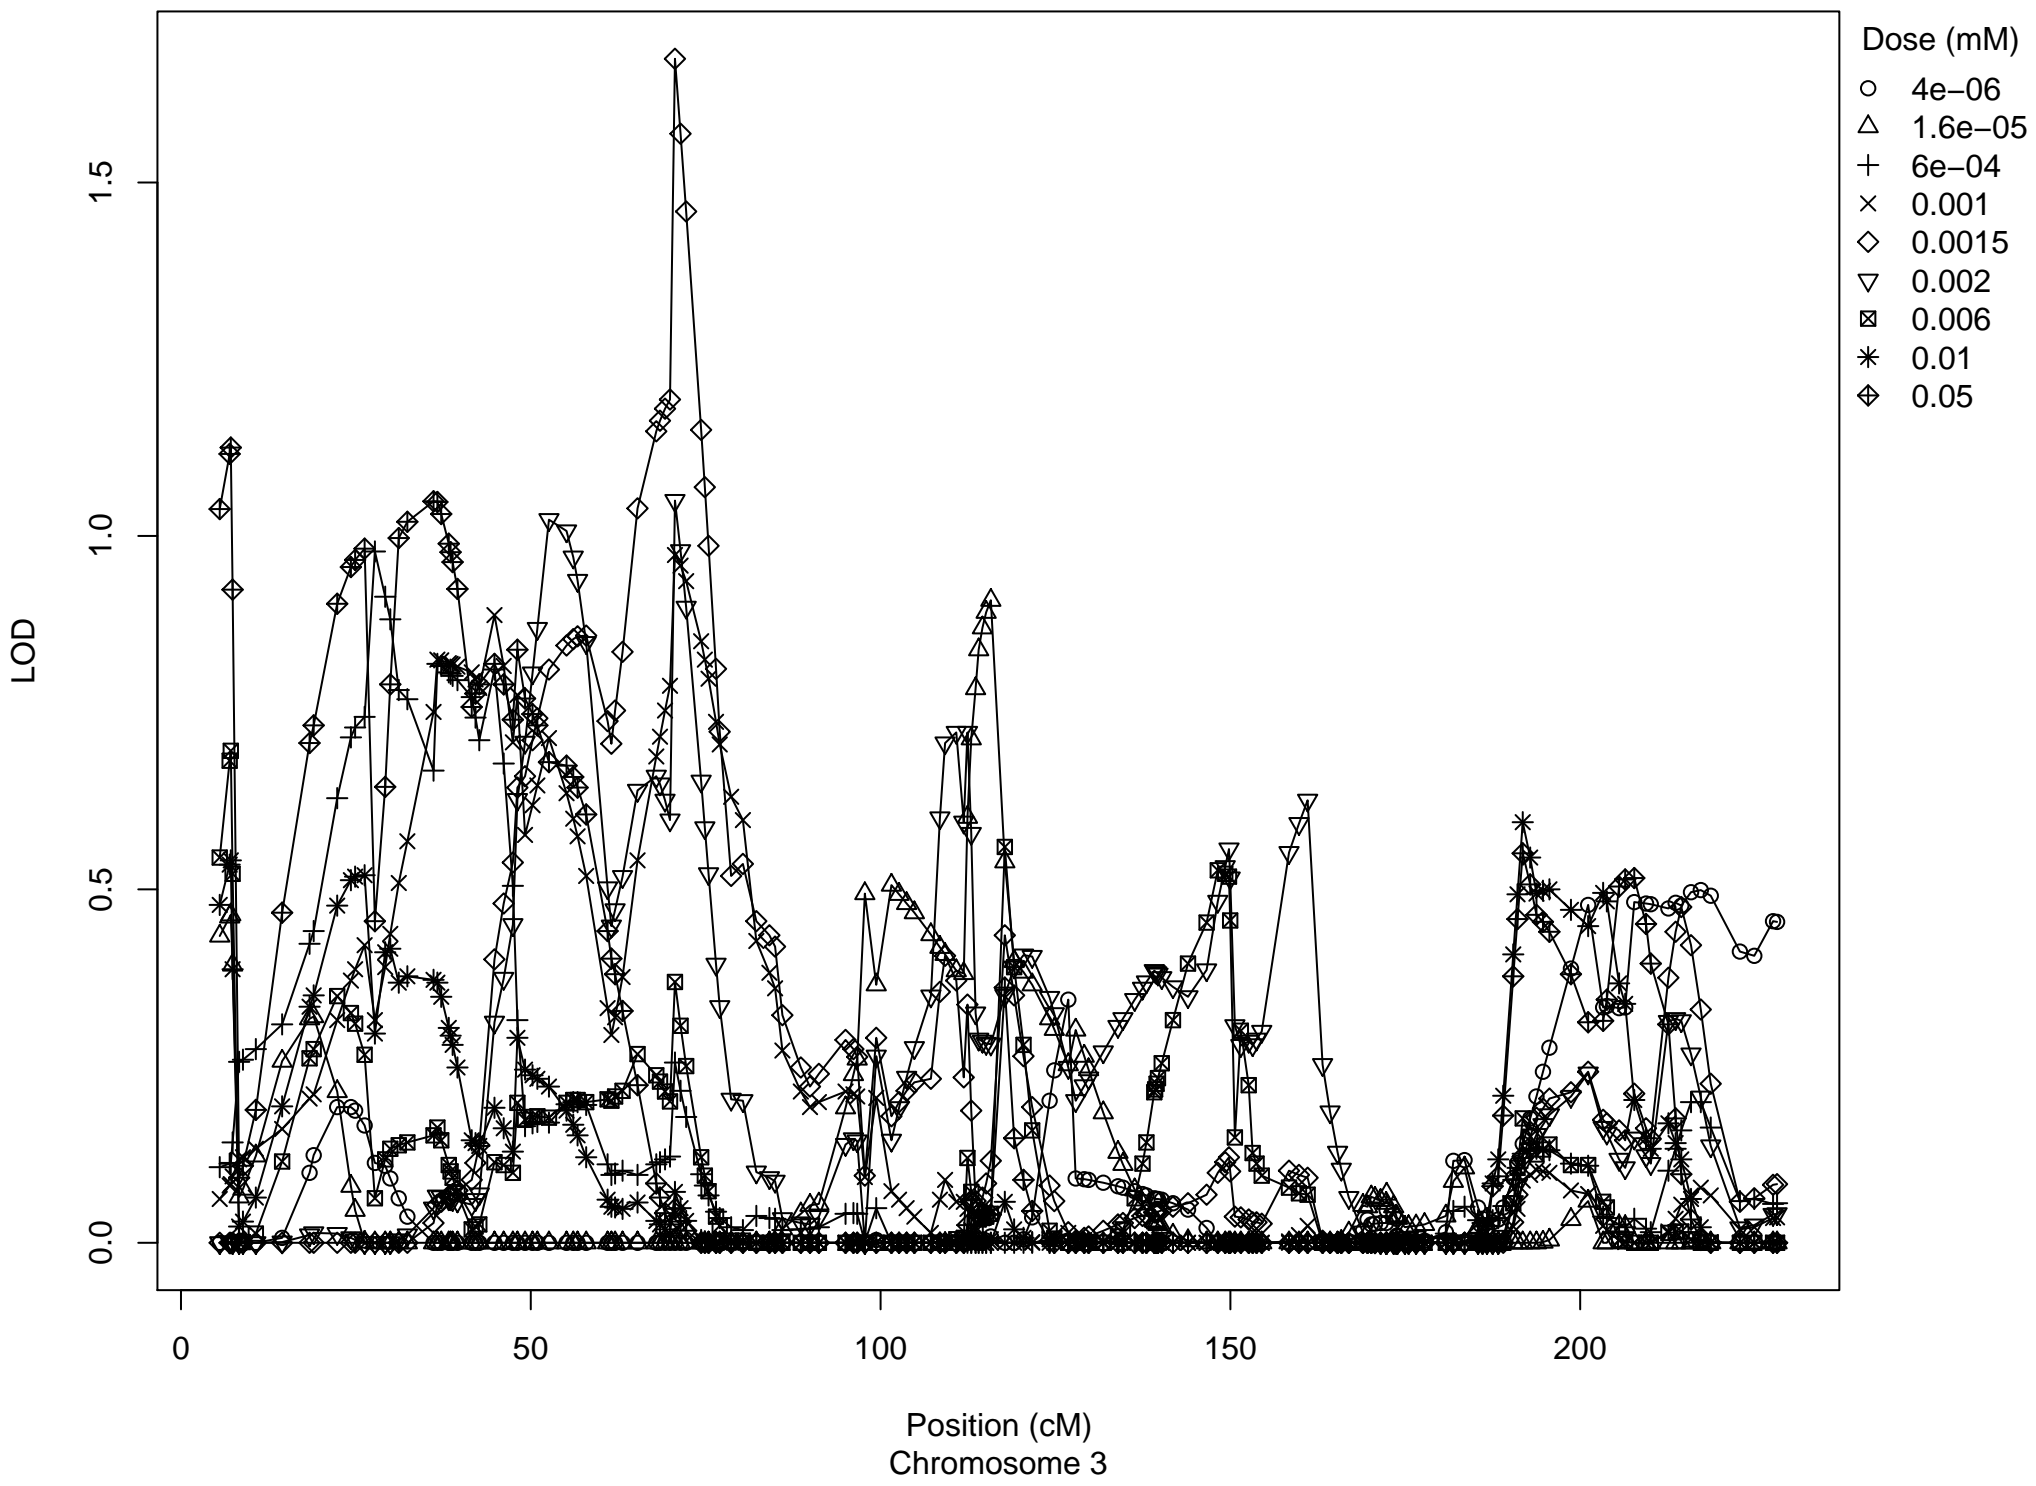





# Irinotecan (CPT11)

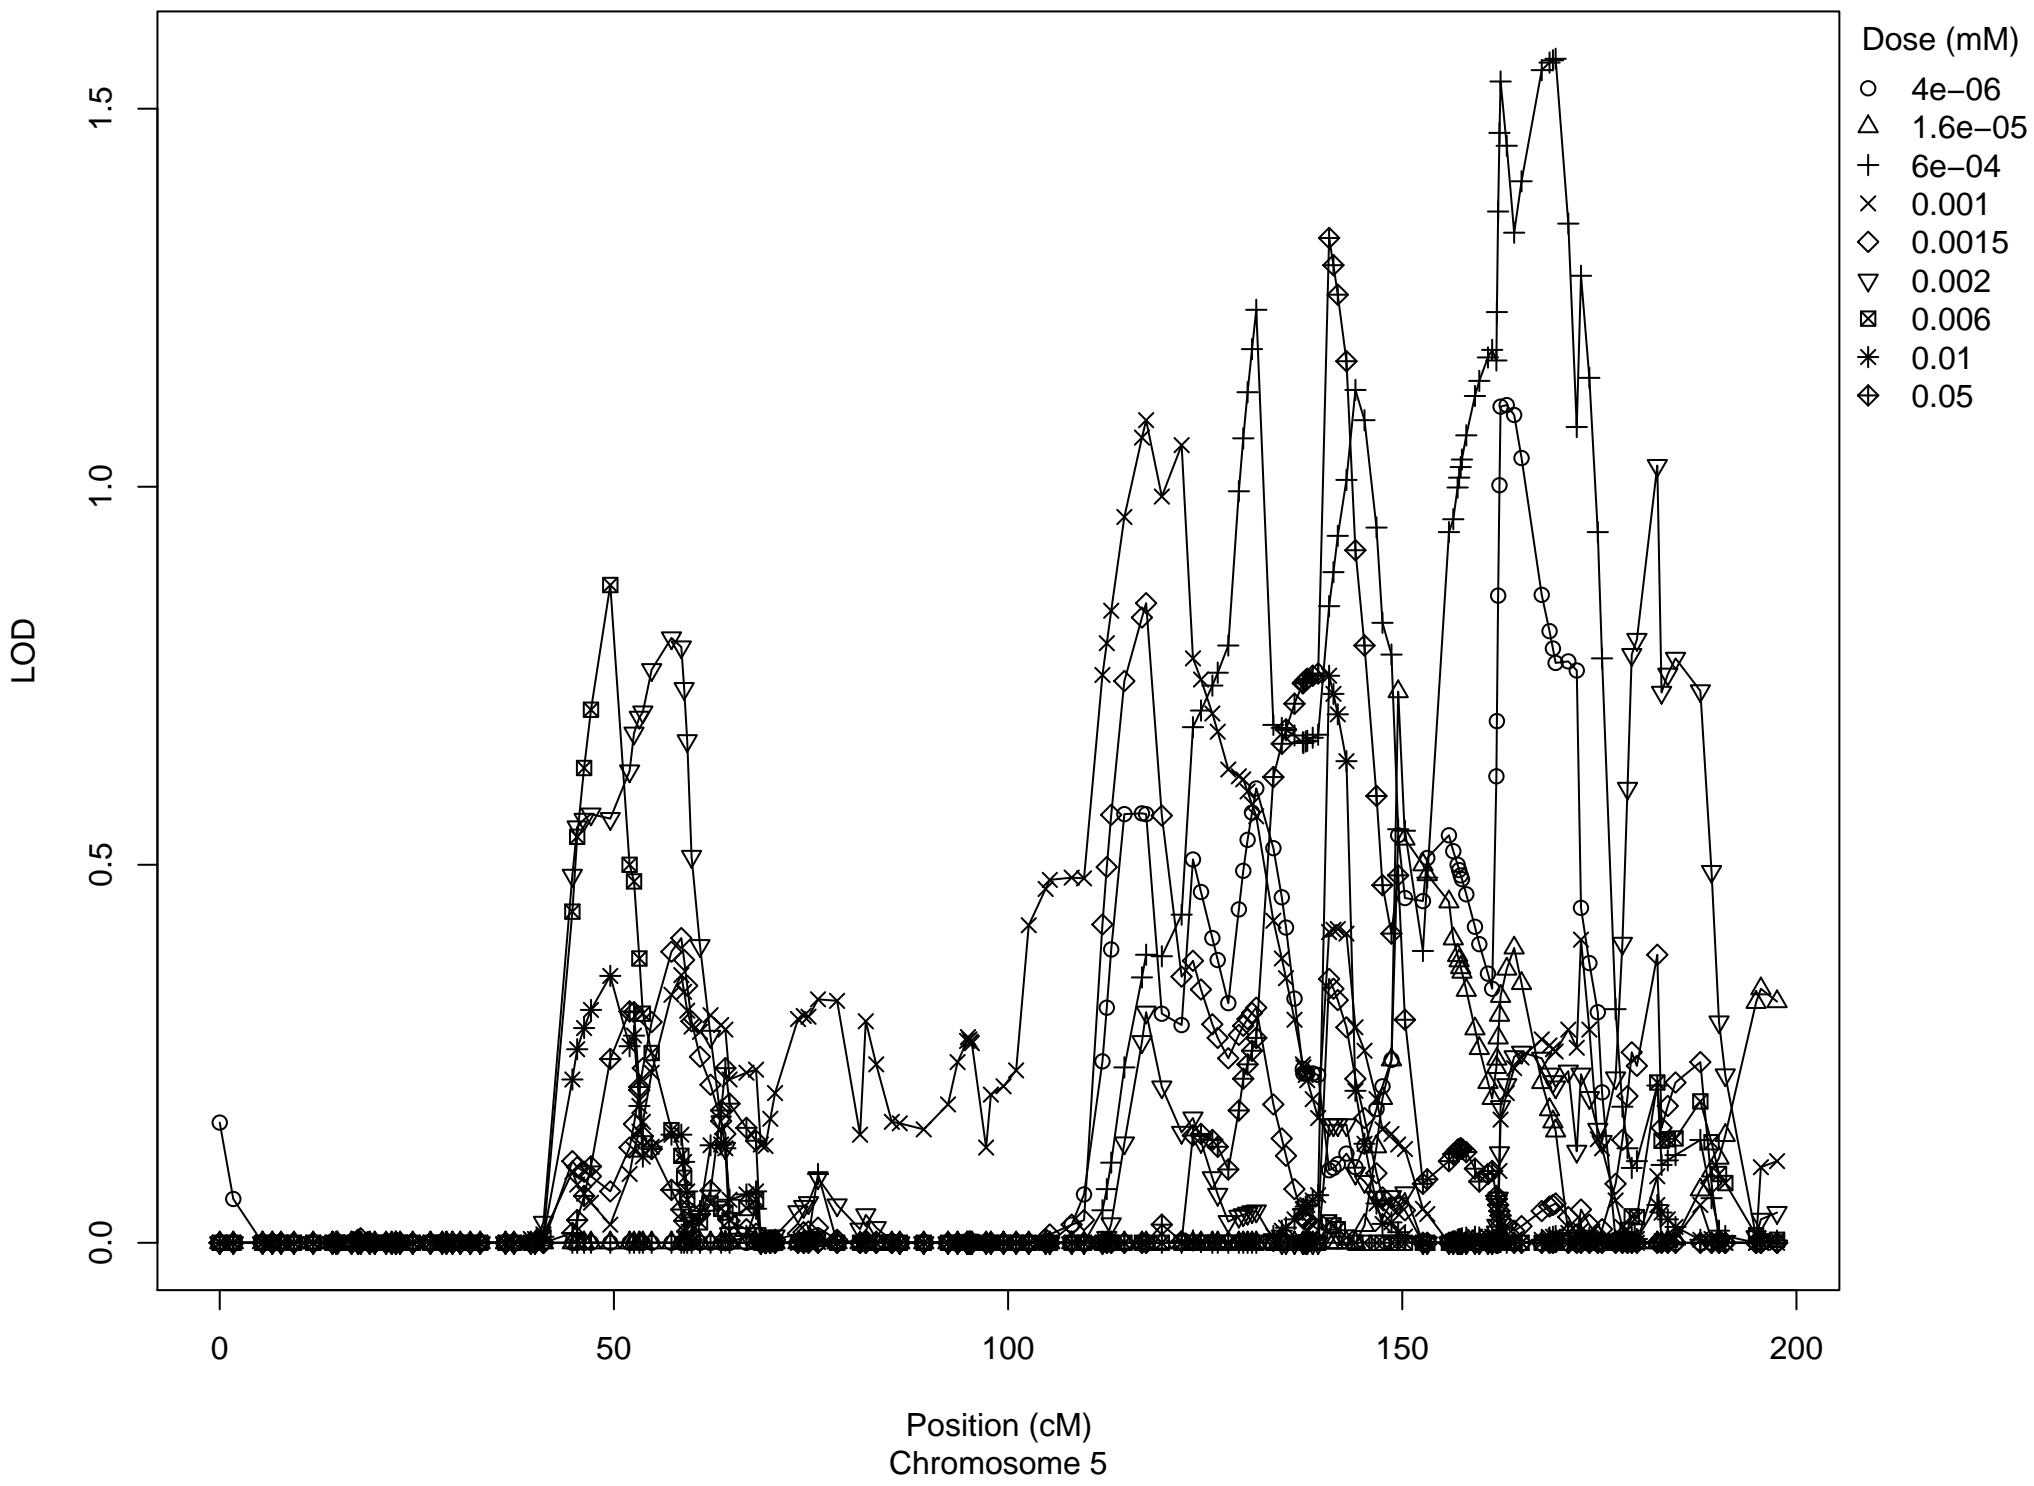

# Irinotecan (CPT11)

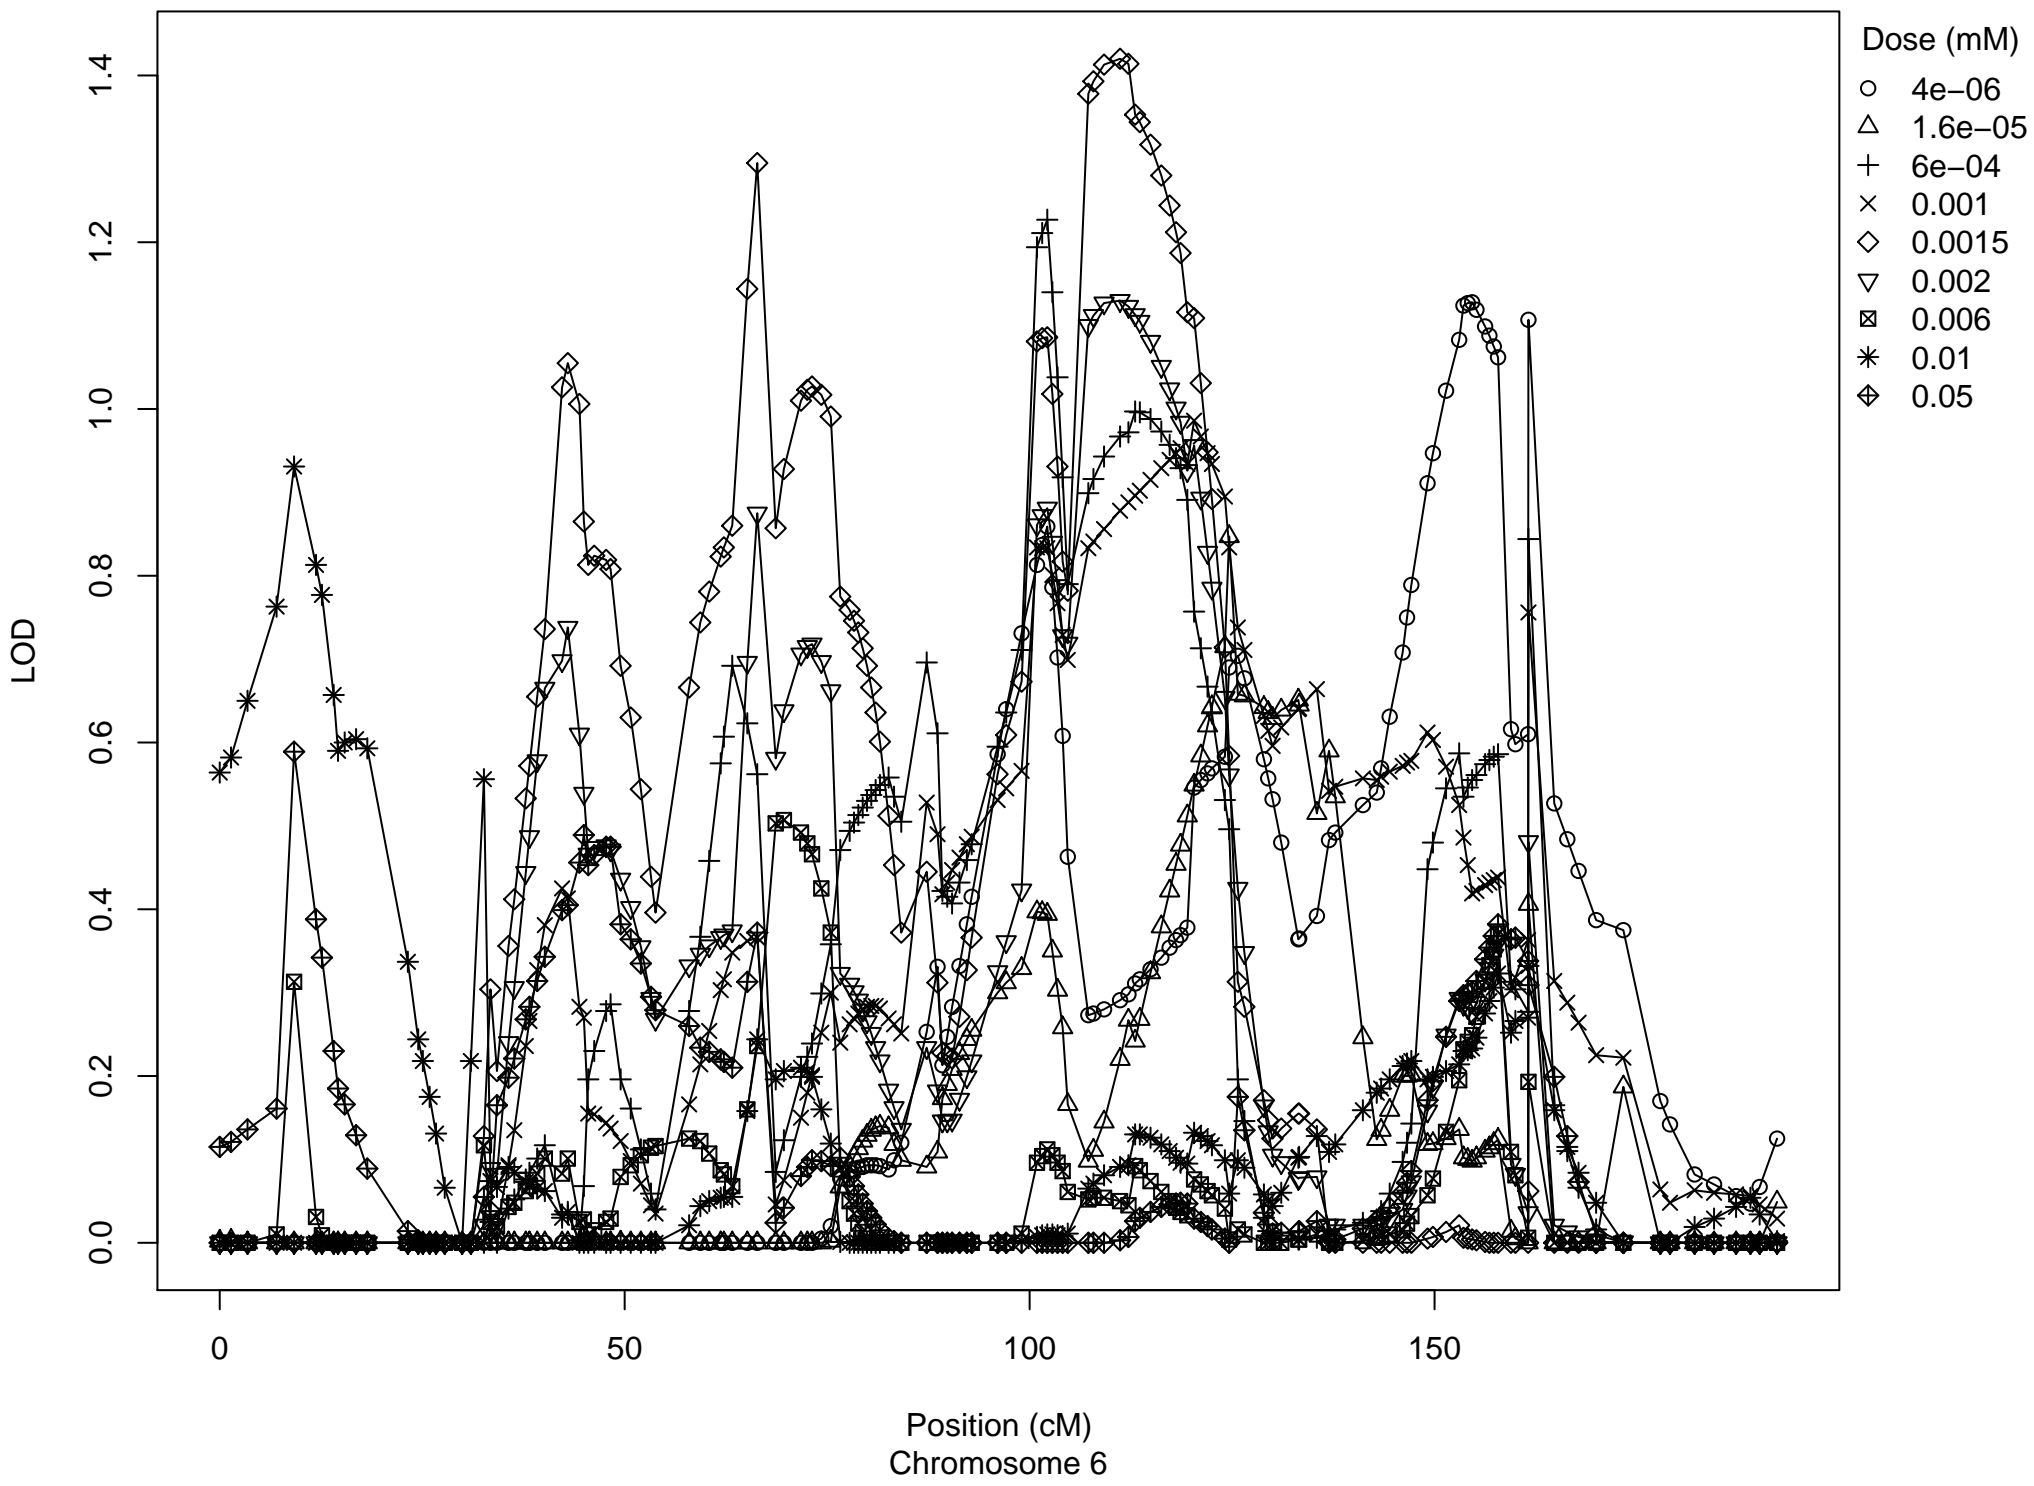

# Irinotecan (CPT11)

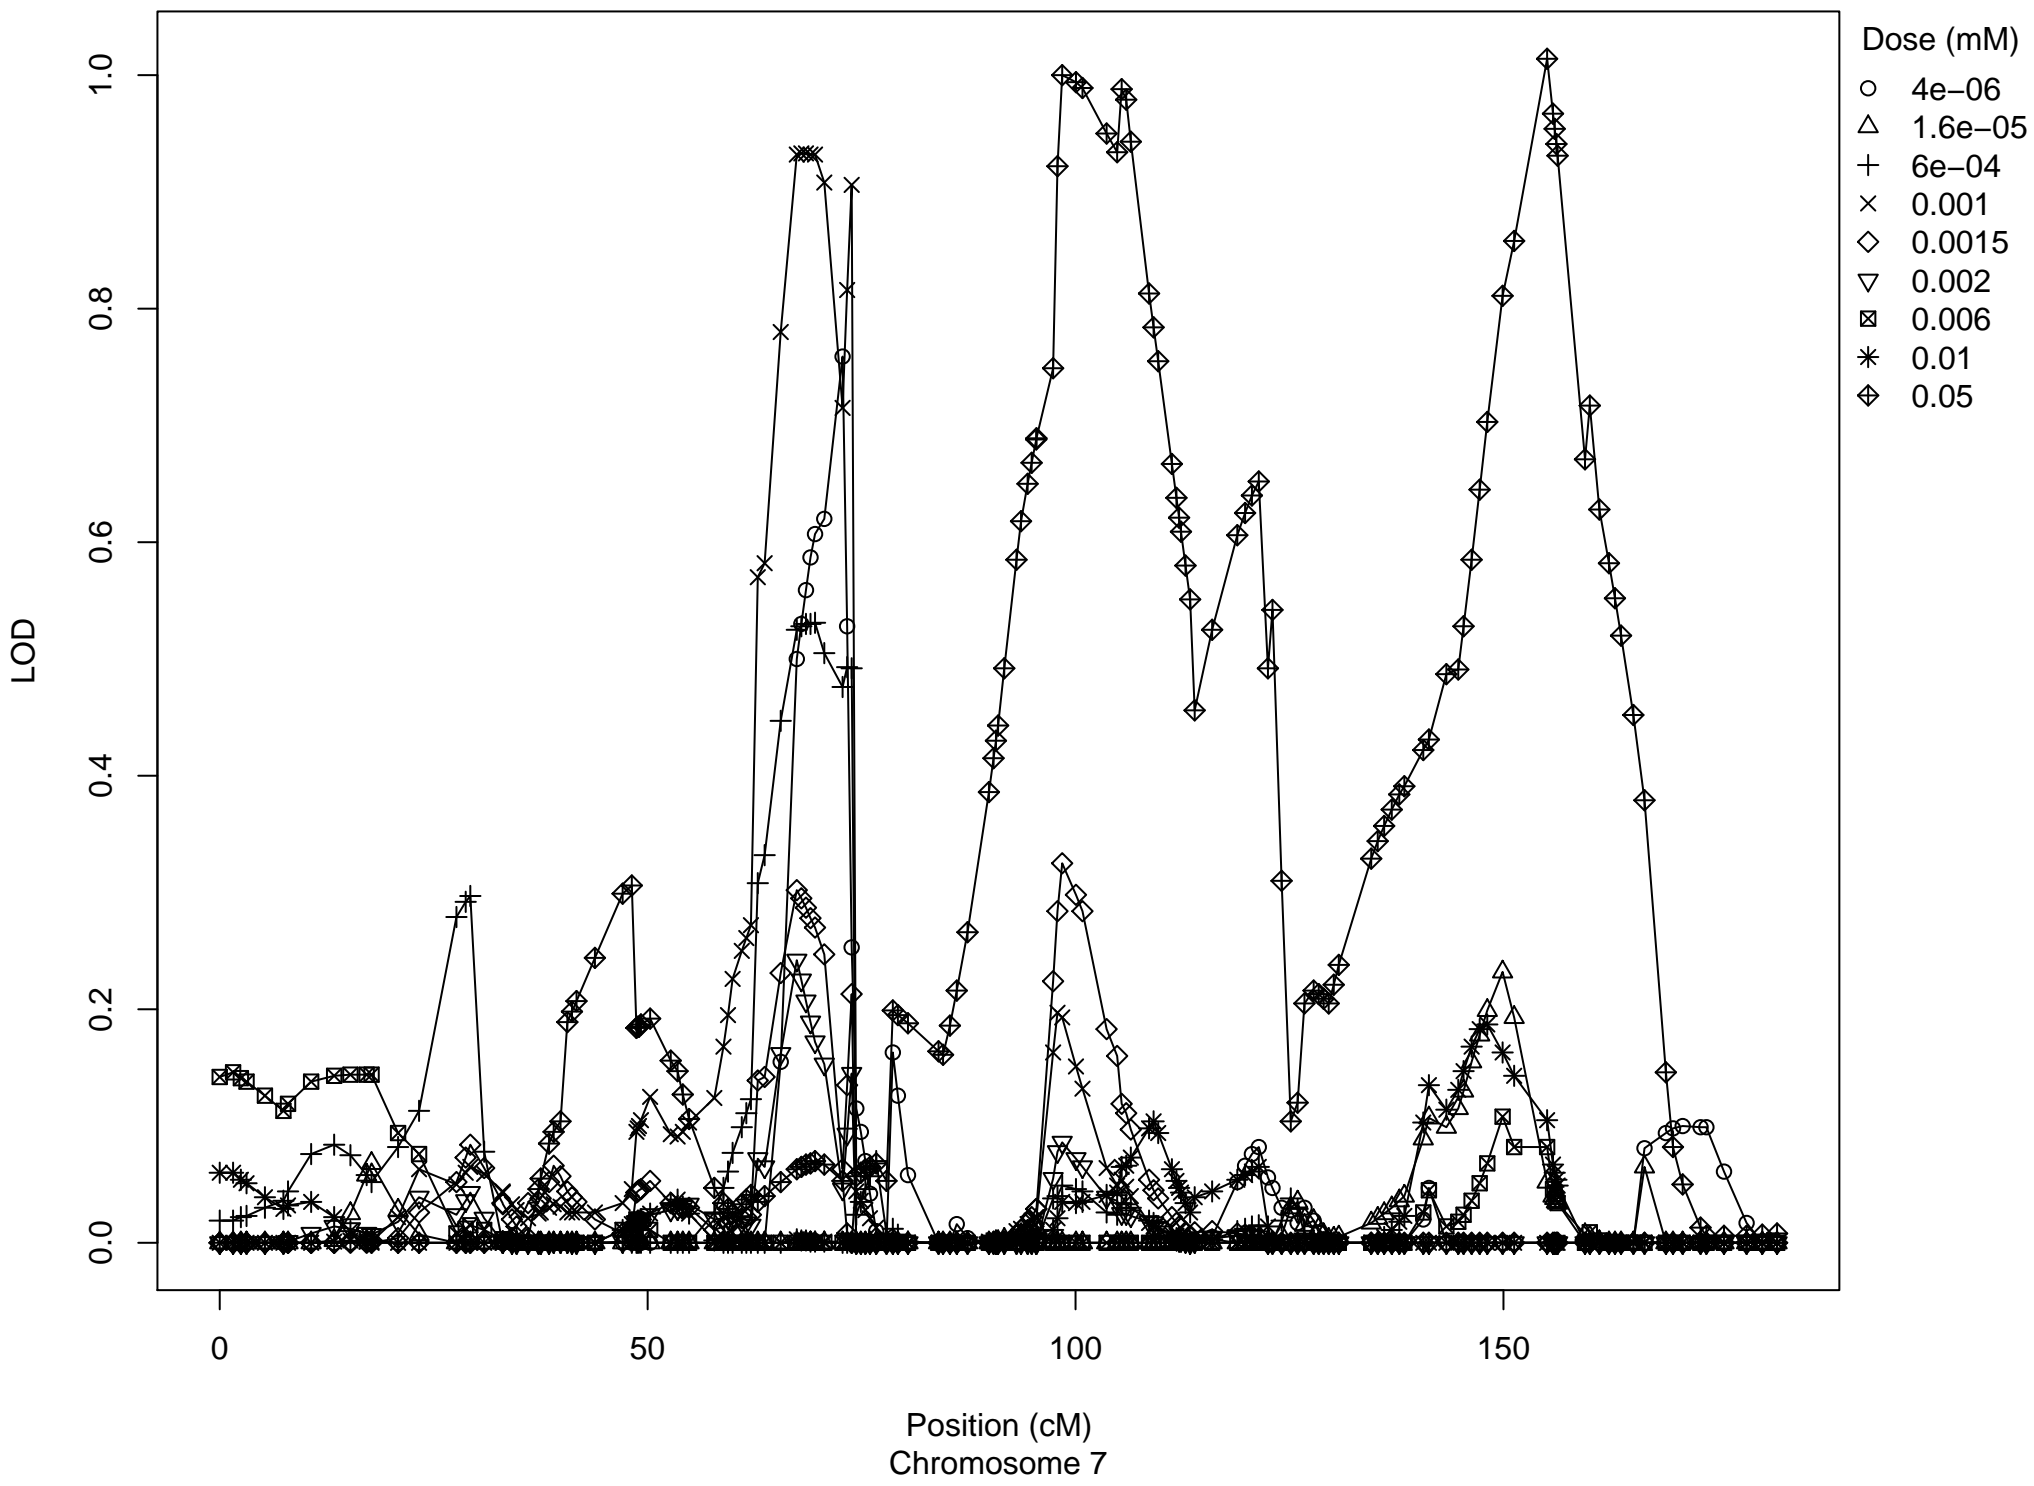

# Irinotecan (CPT11)

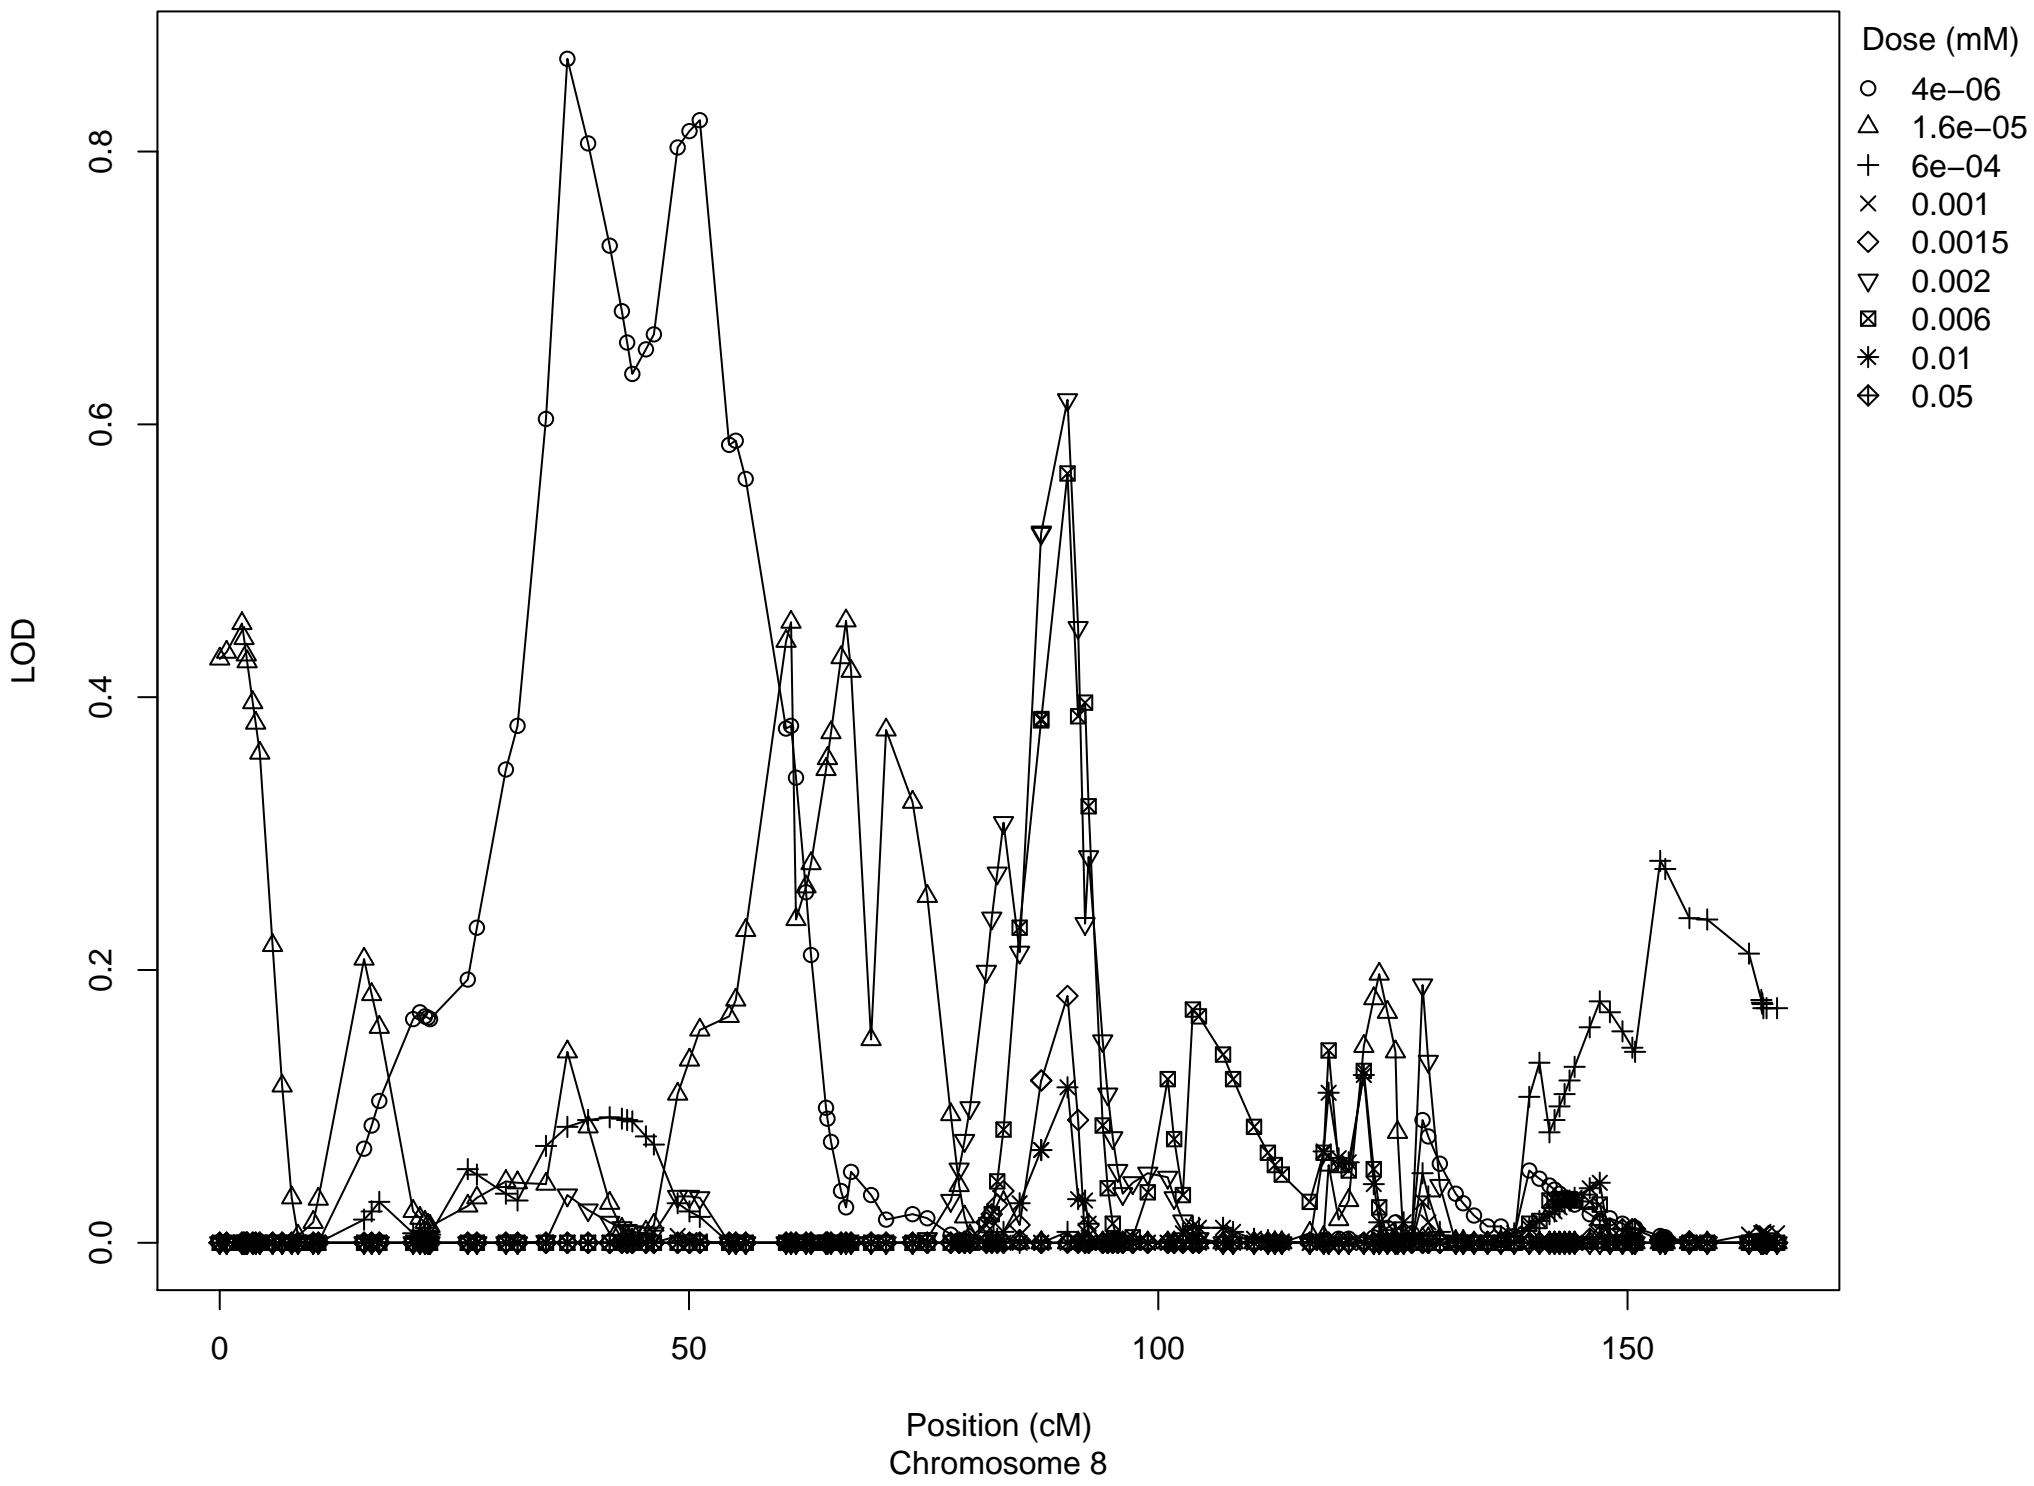



# Irinotecan (CPT11)

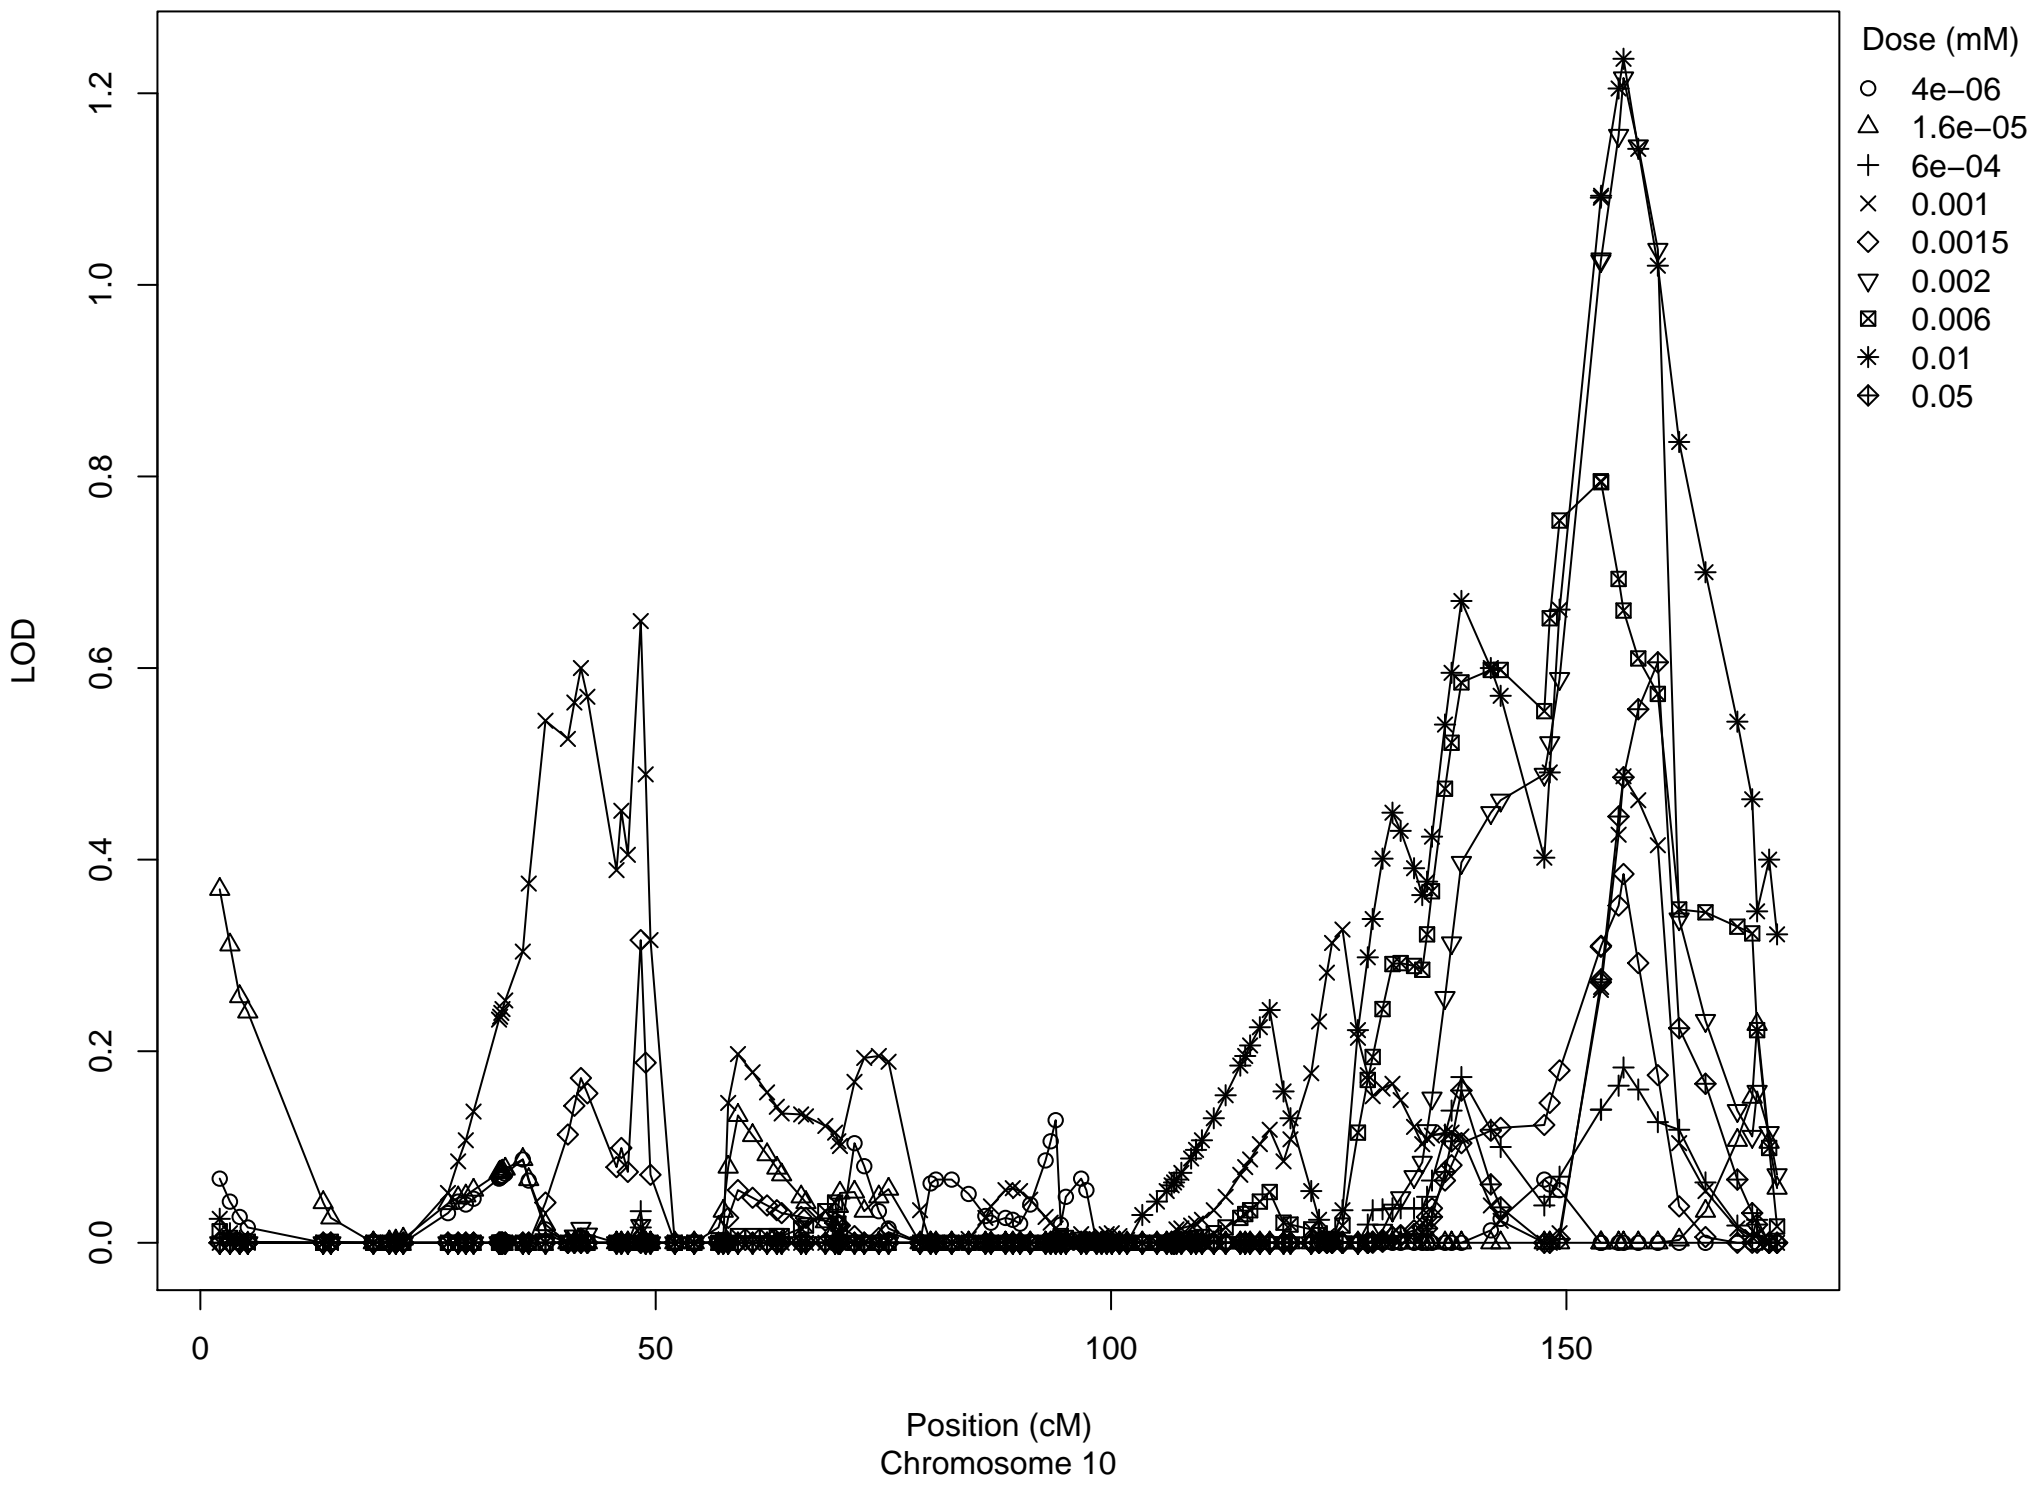

# Irinotecan (CPT11)

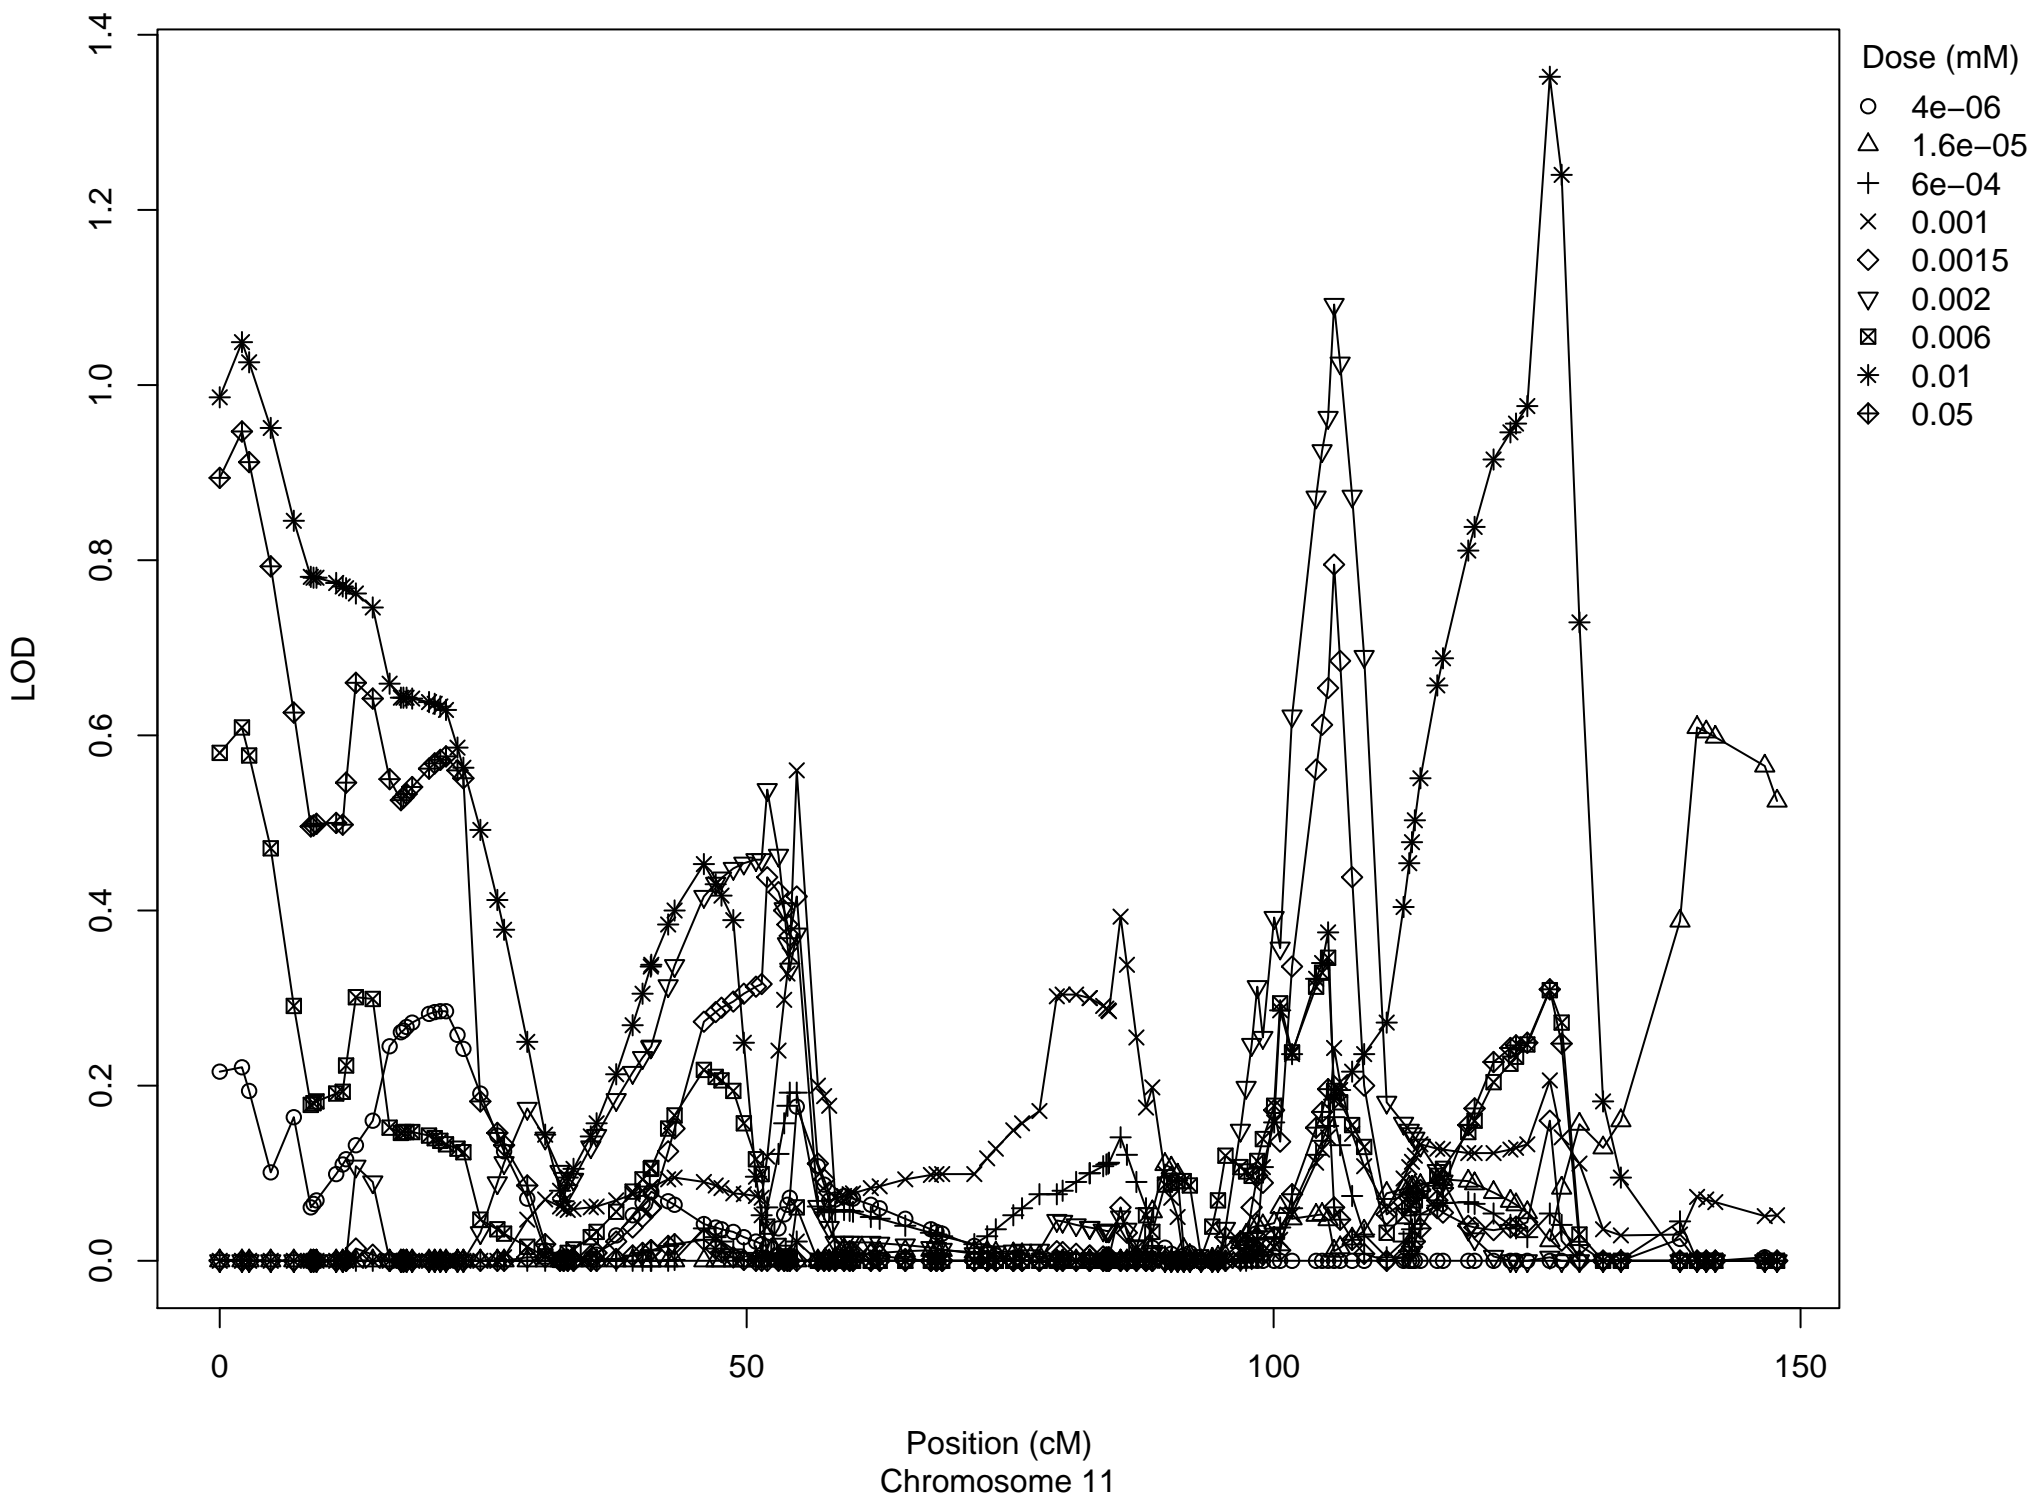

# Irinotecan (CPT11)

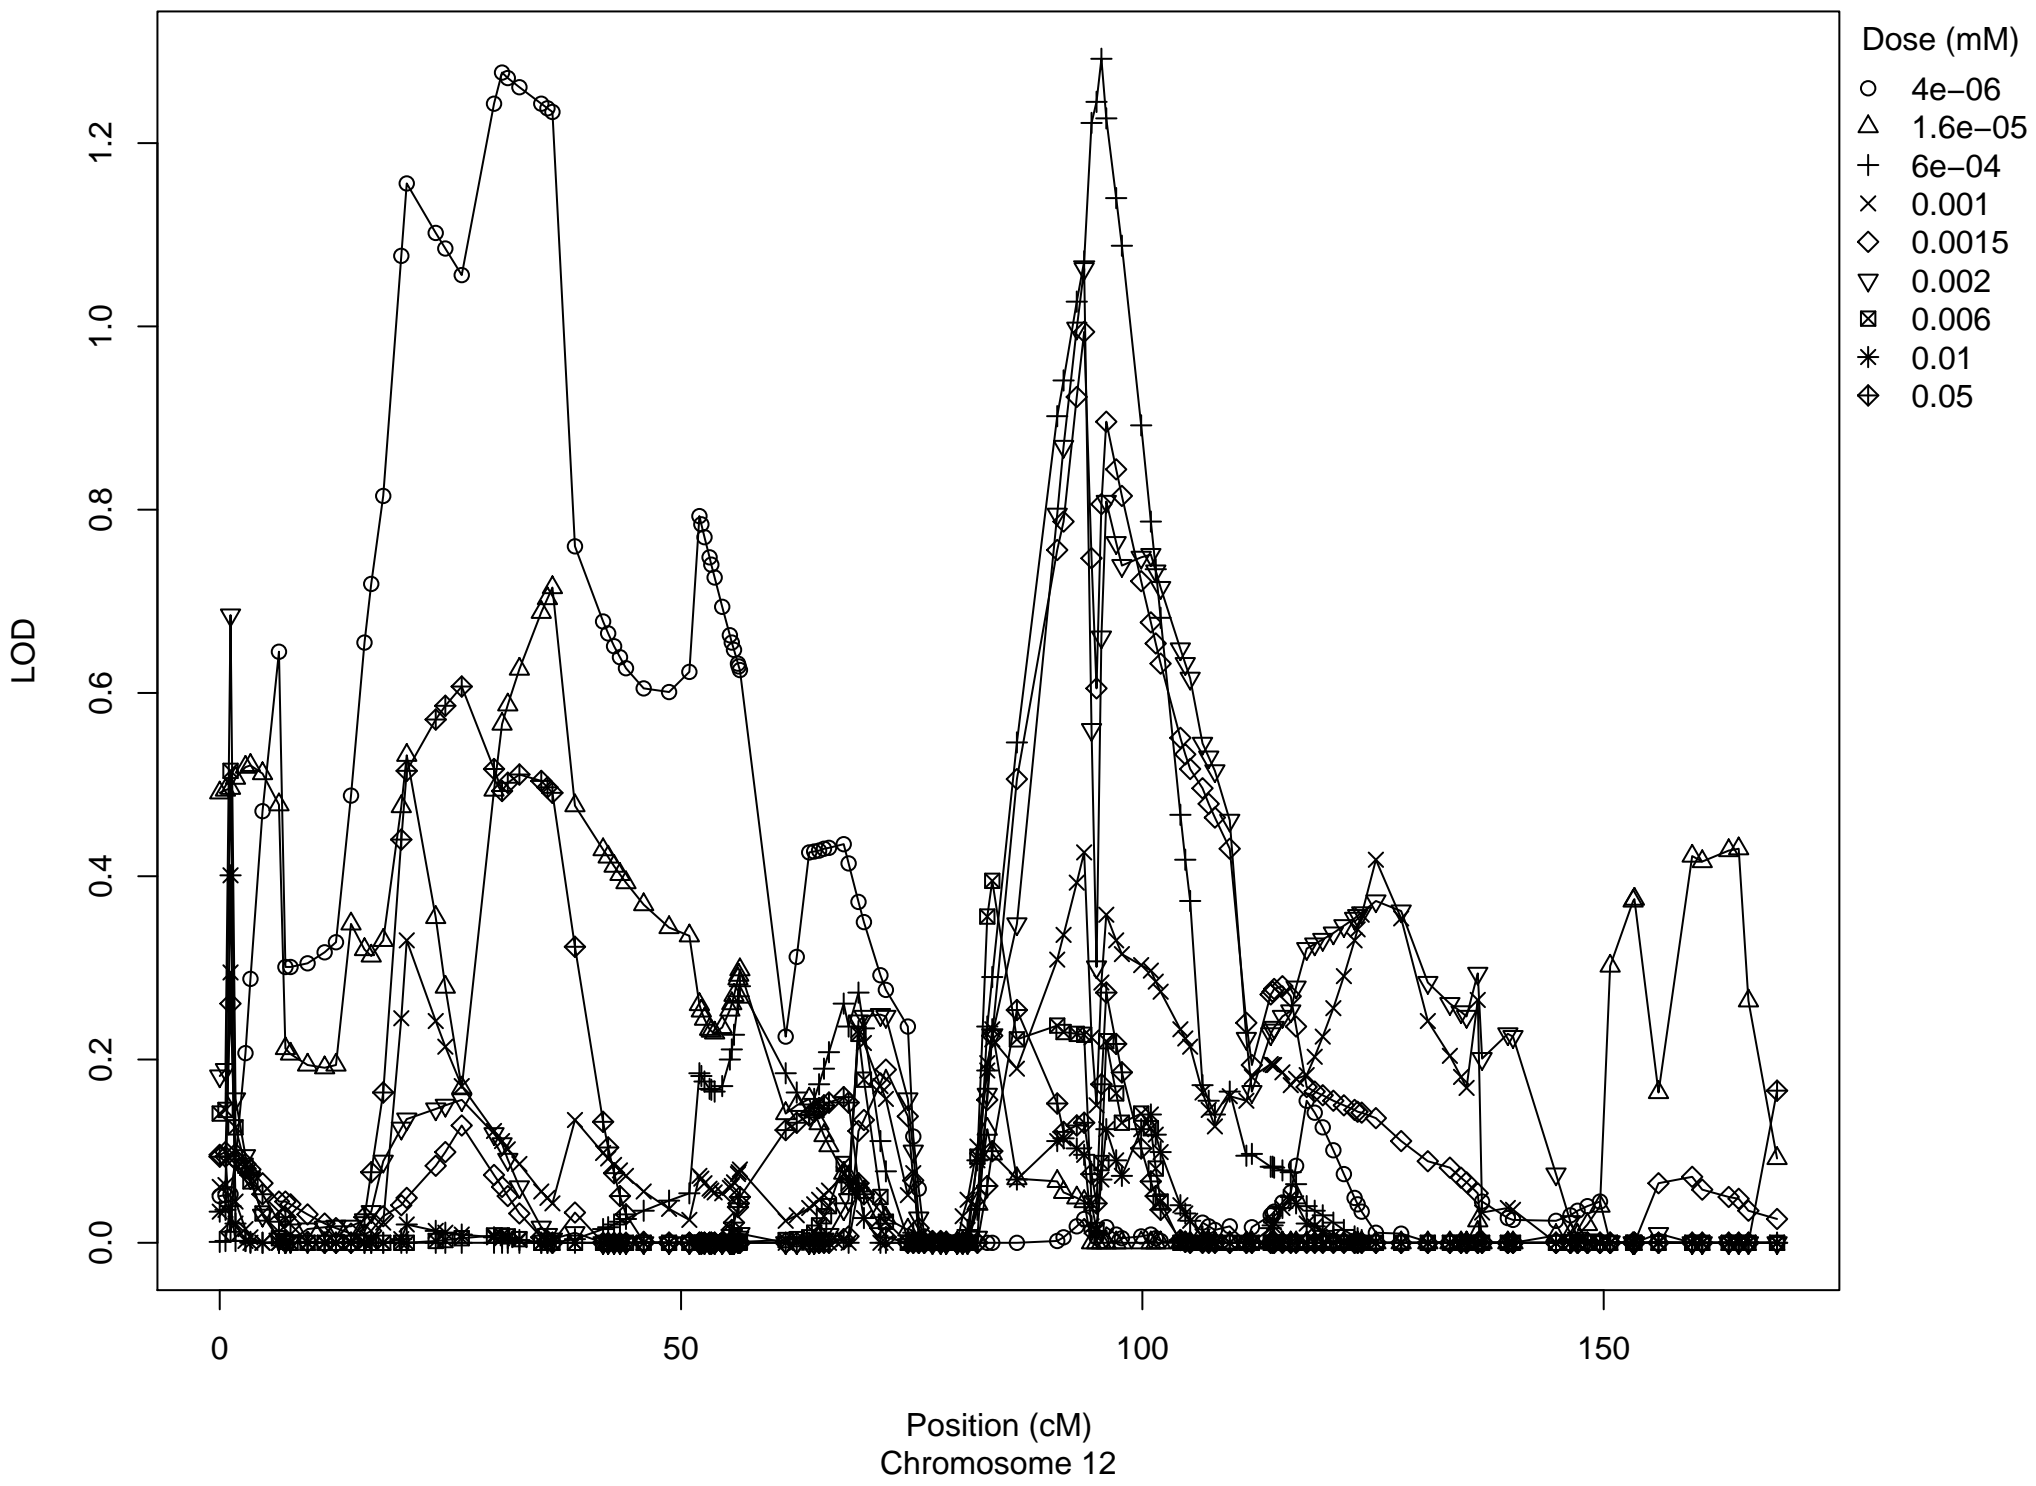



# Irinotecan (CPT11)

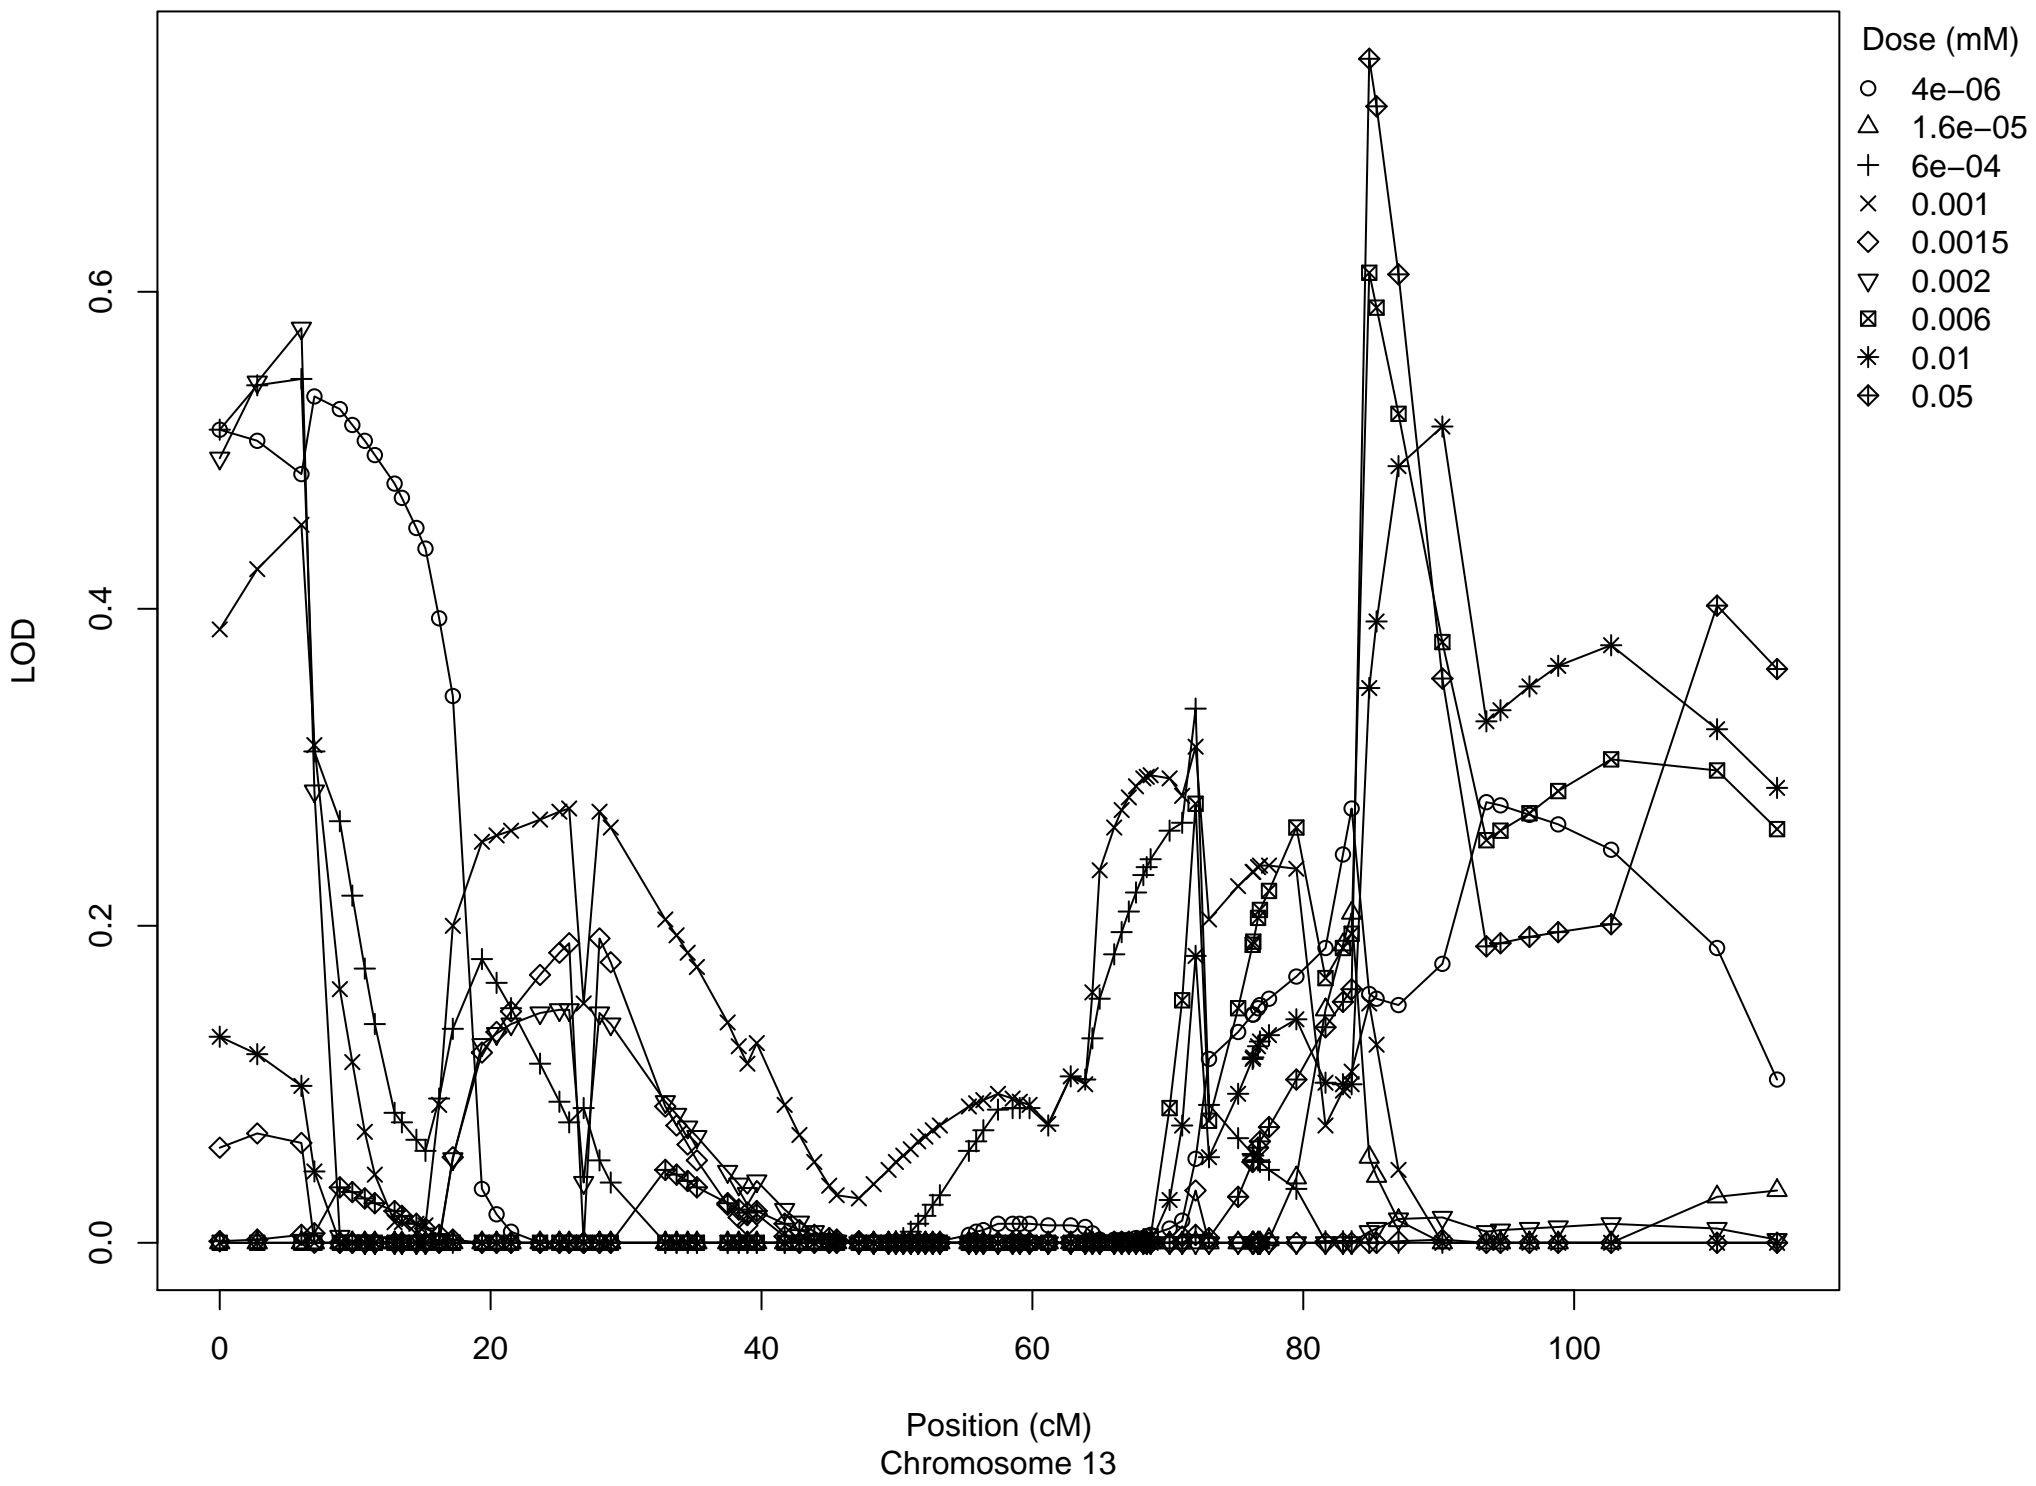

# Irinotecan (CPT11)

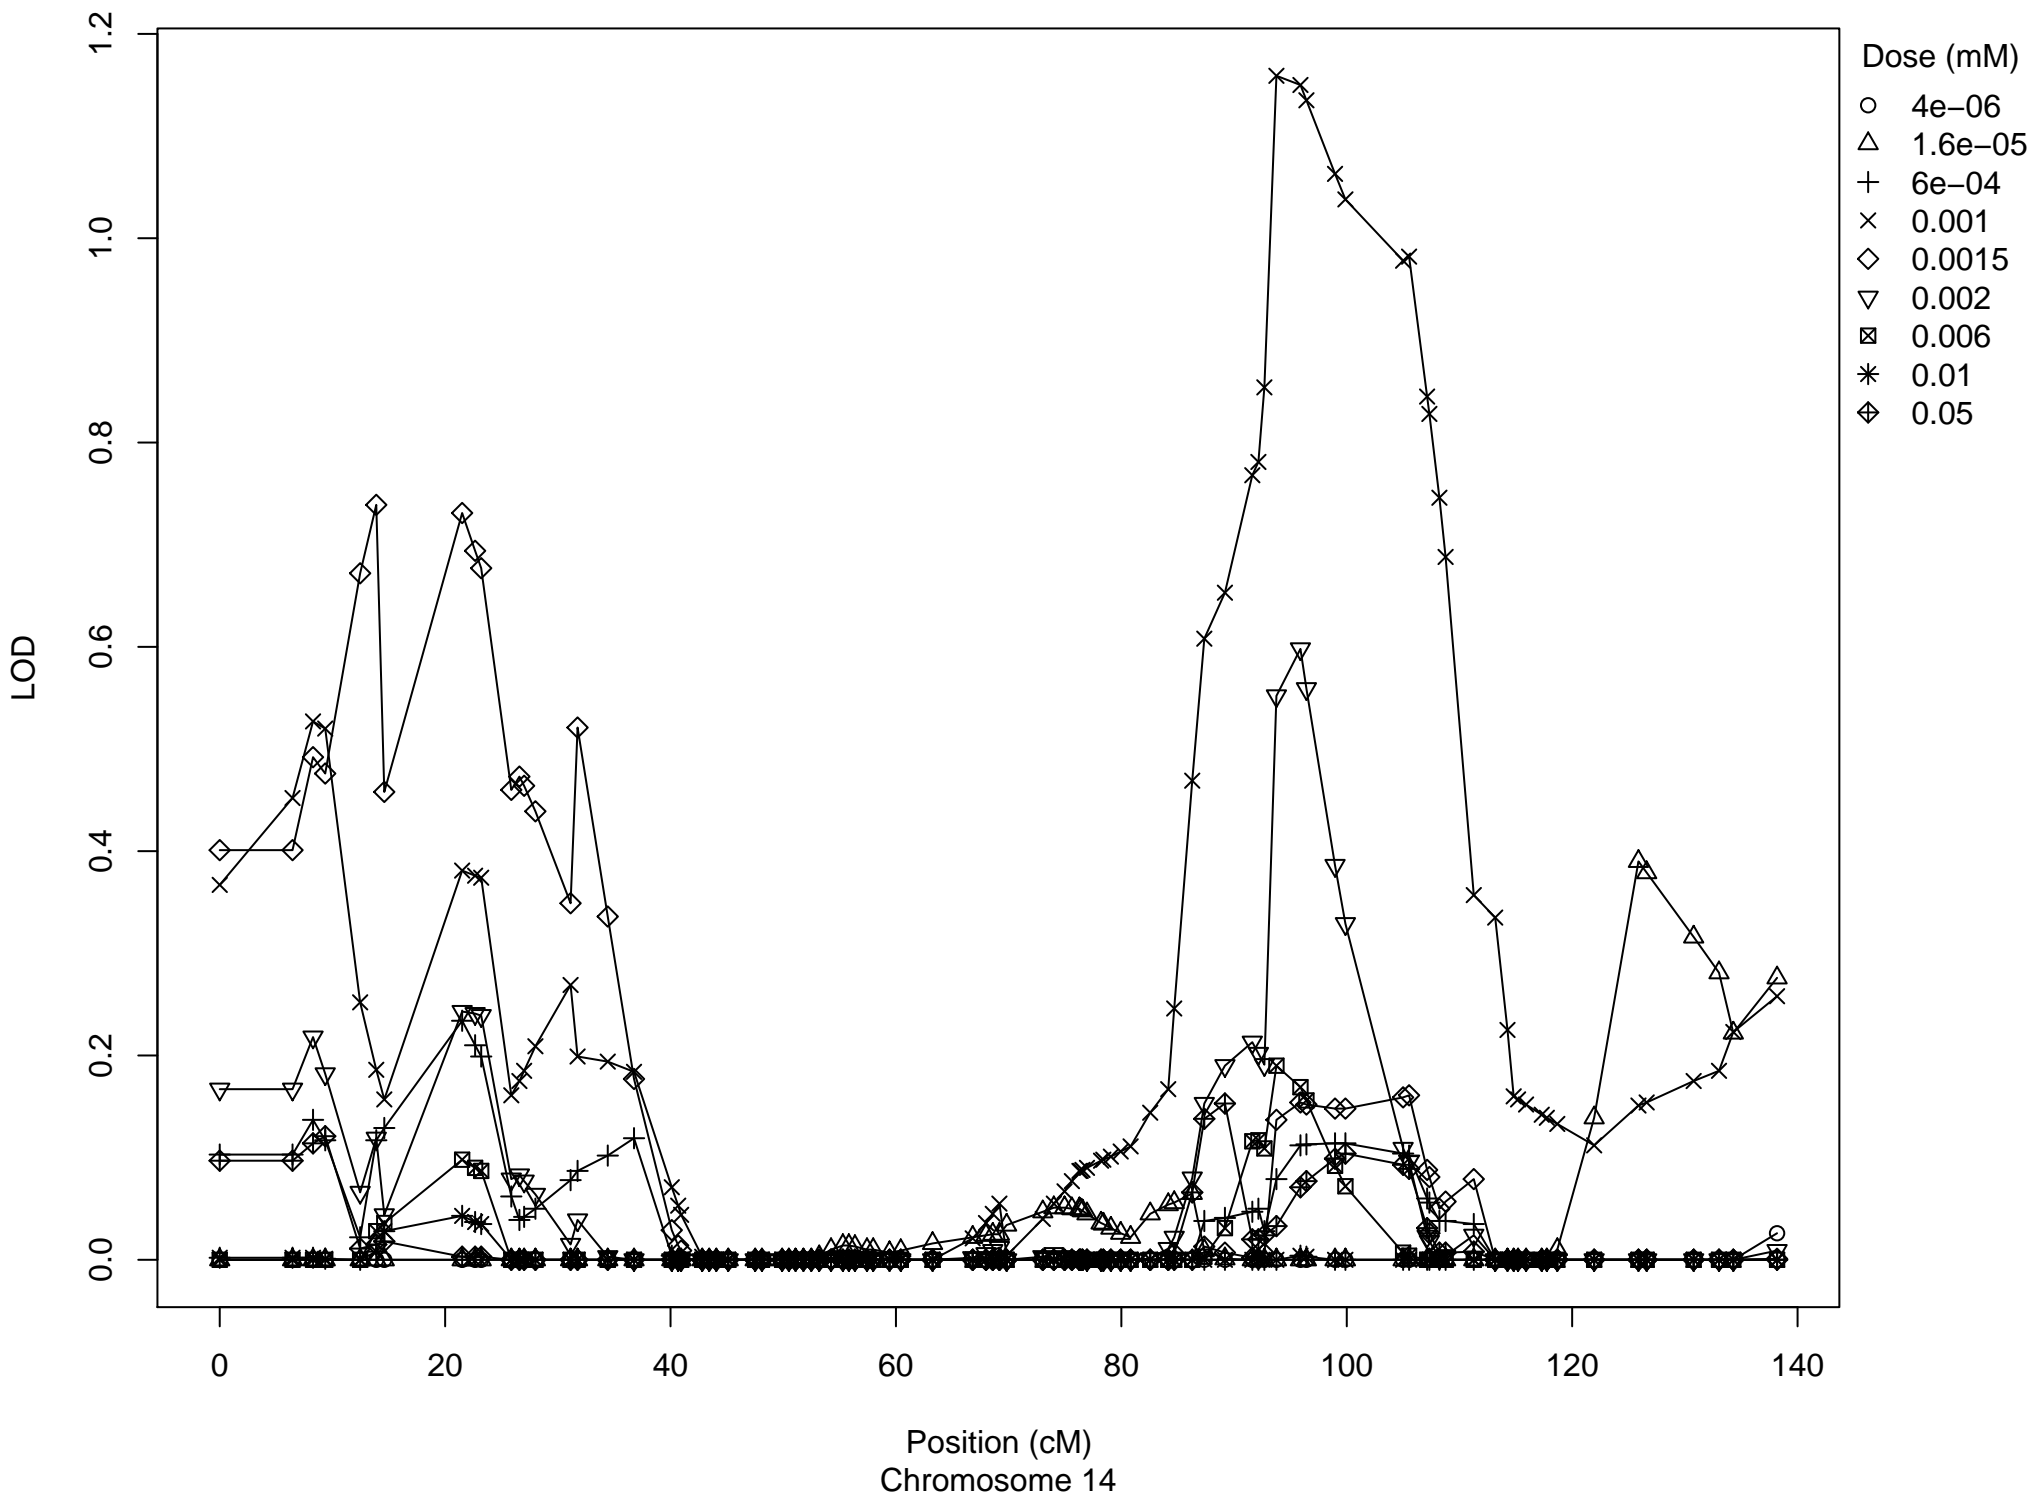

# Irinotecan (CPT11)

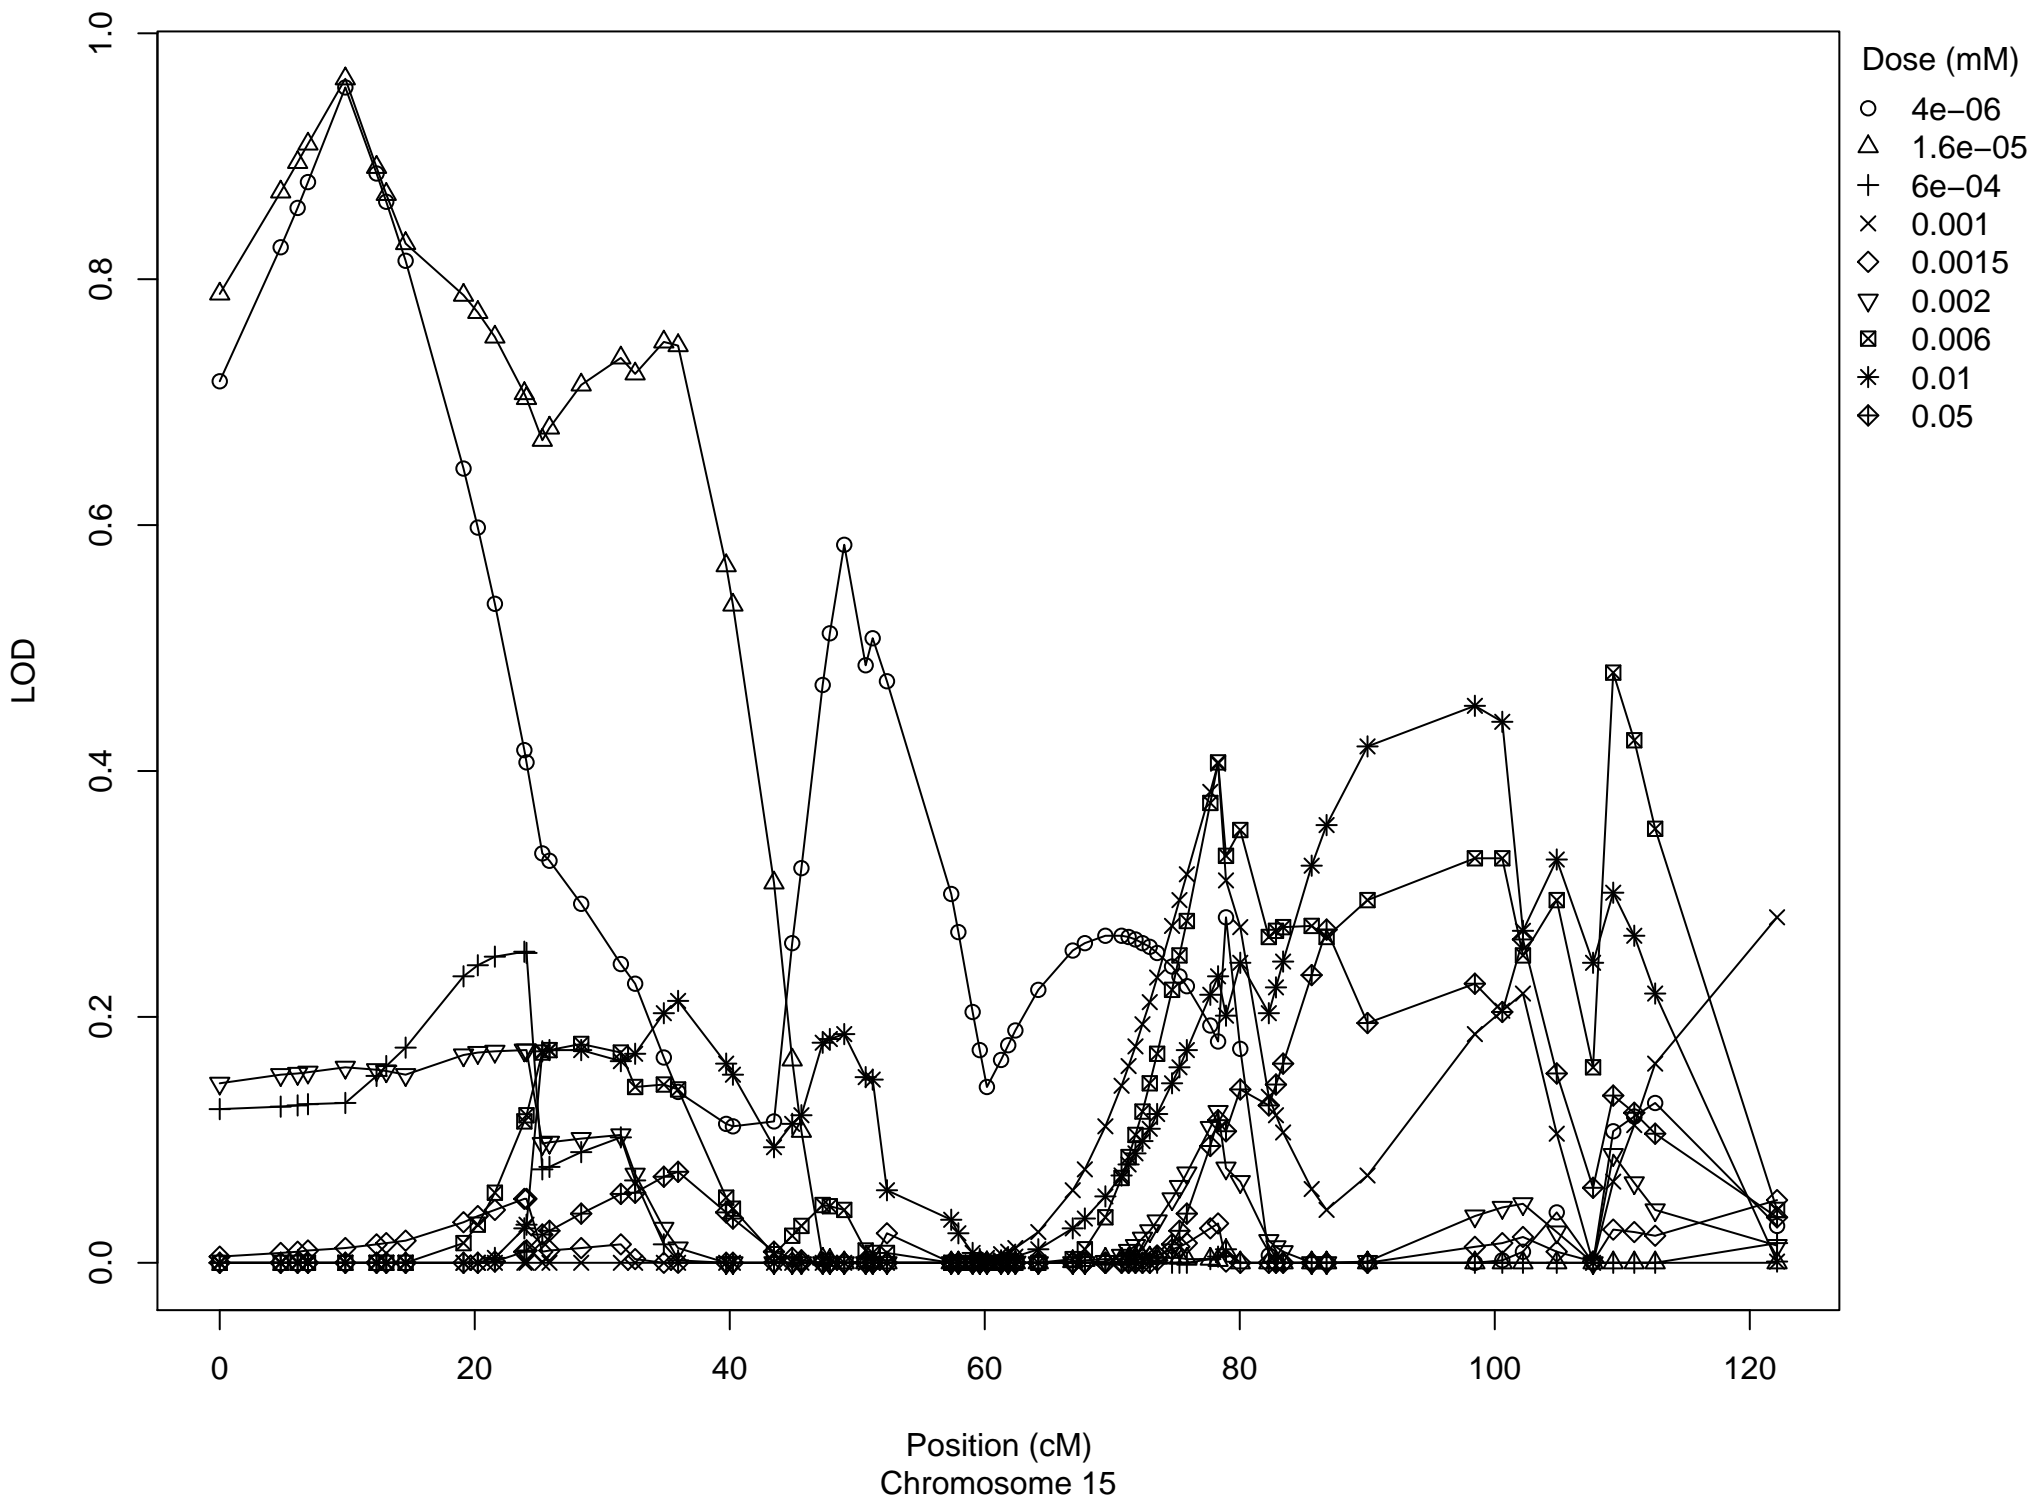







# Irinotecan (CPT11)

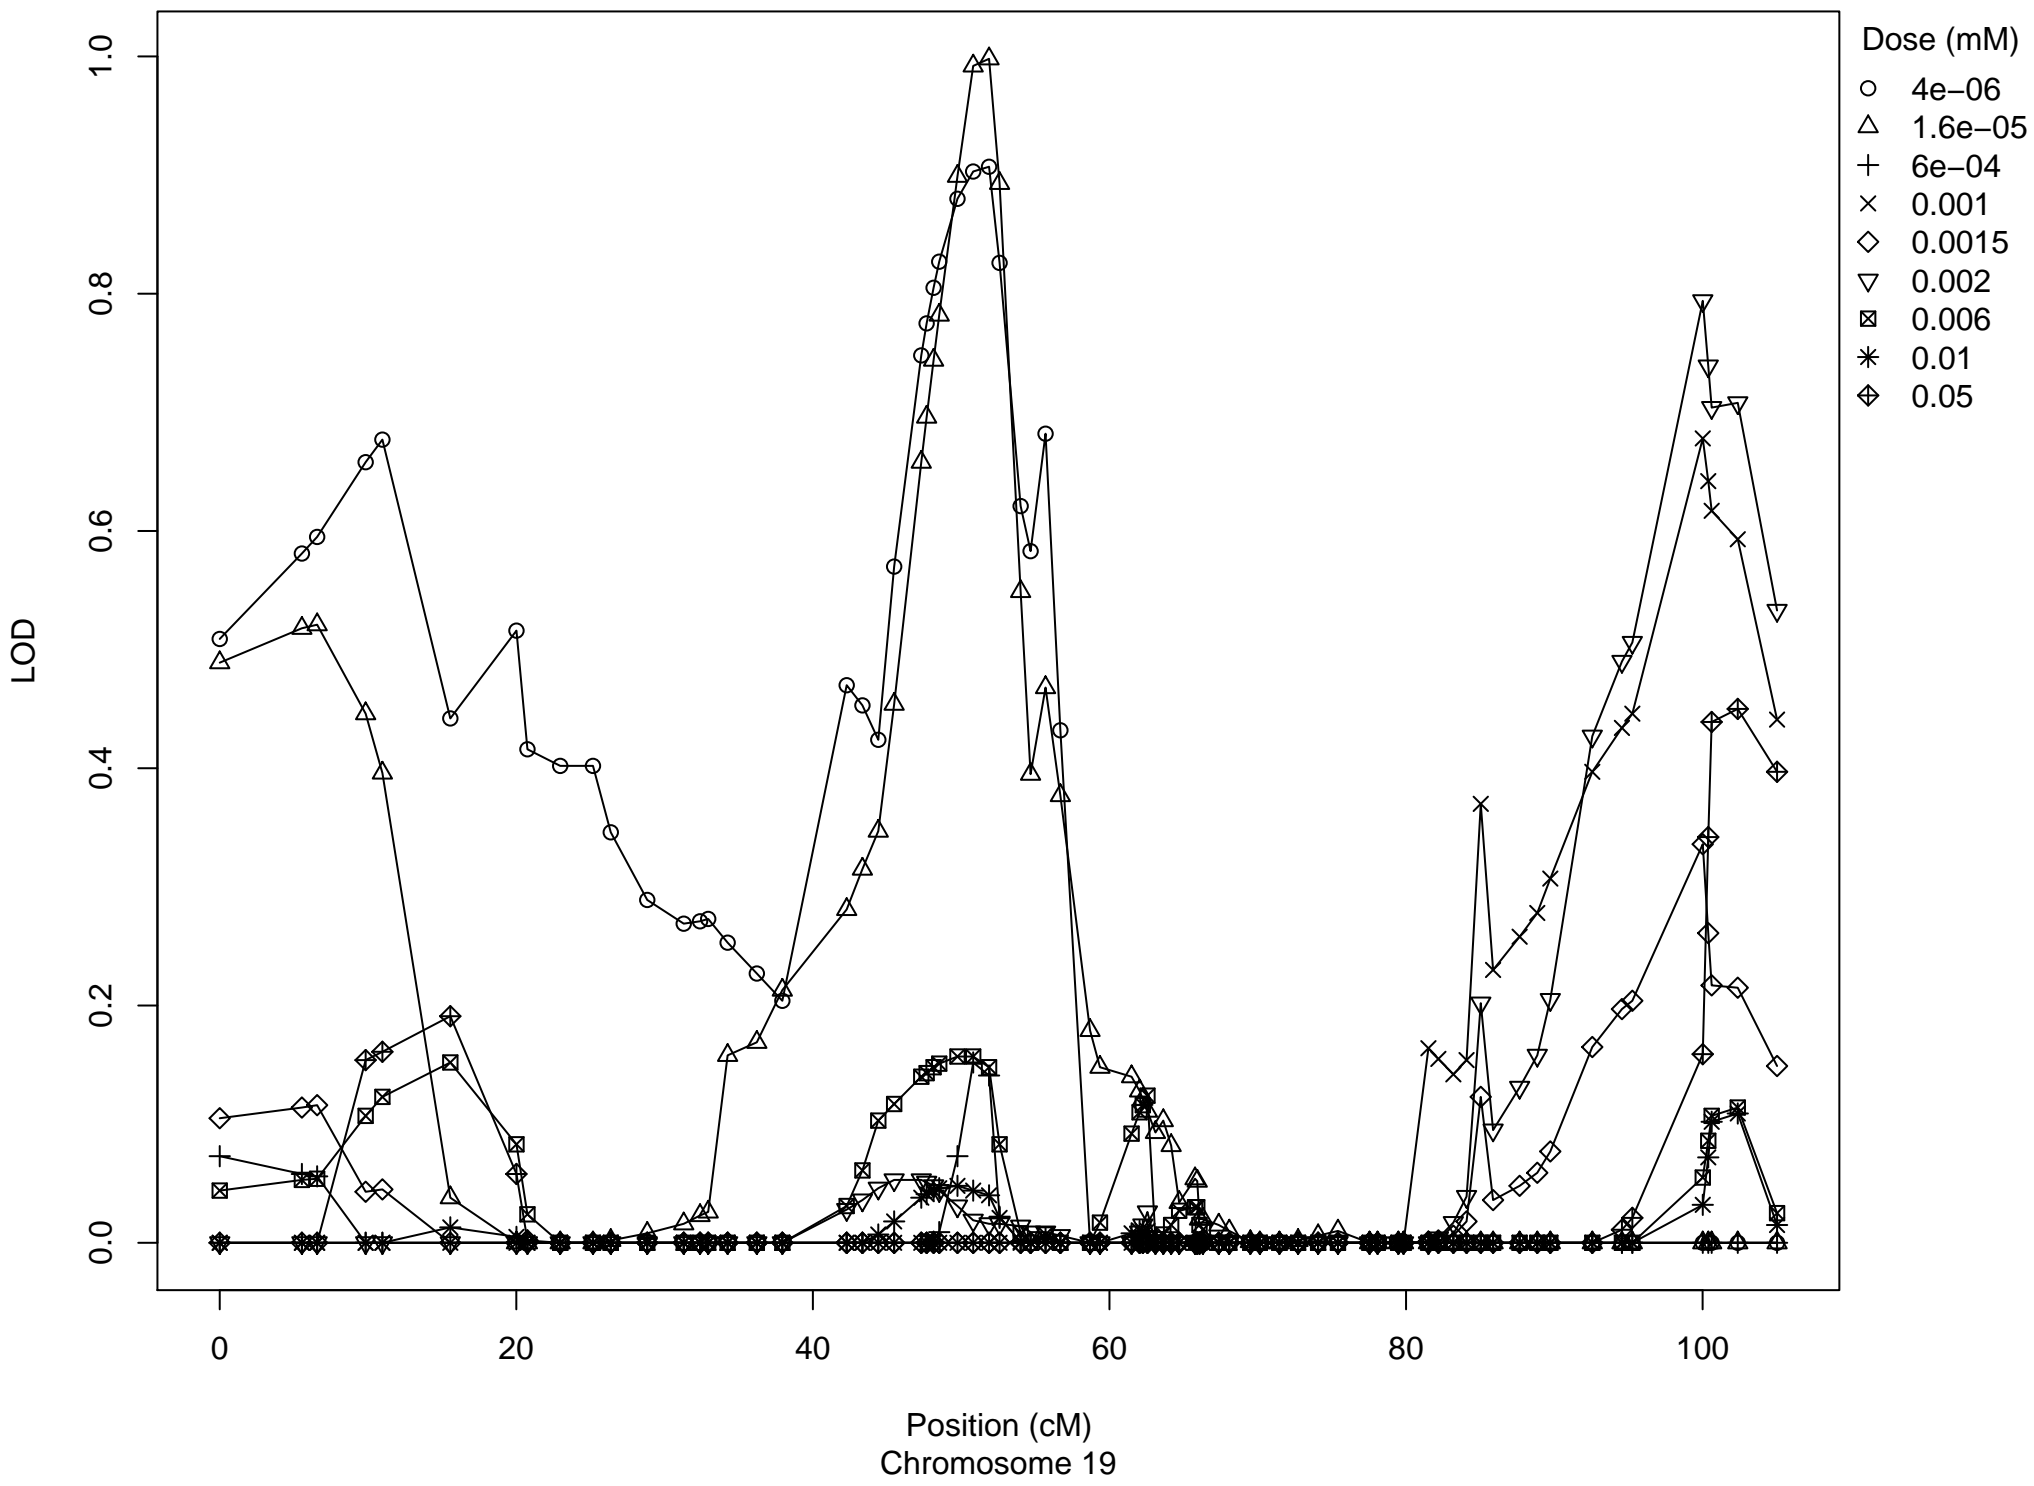

# Irinotecan (CPT11)

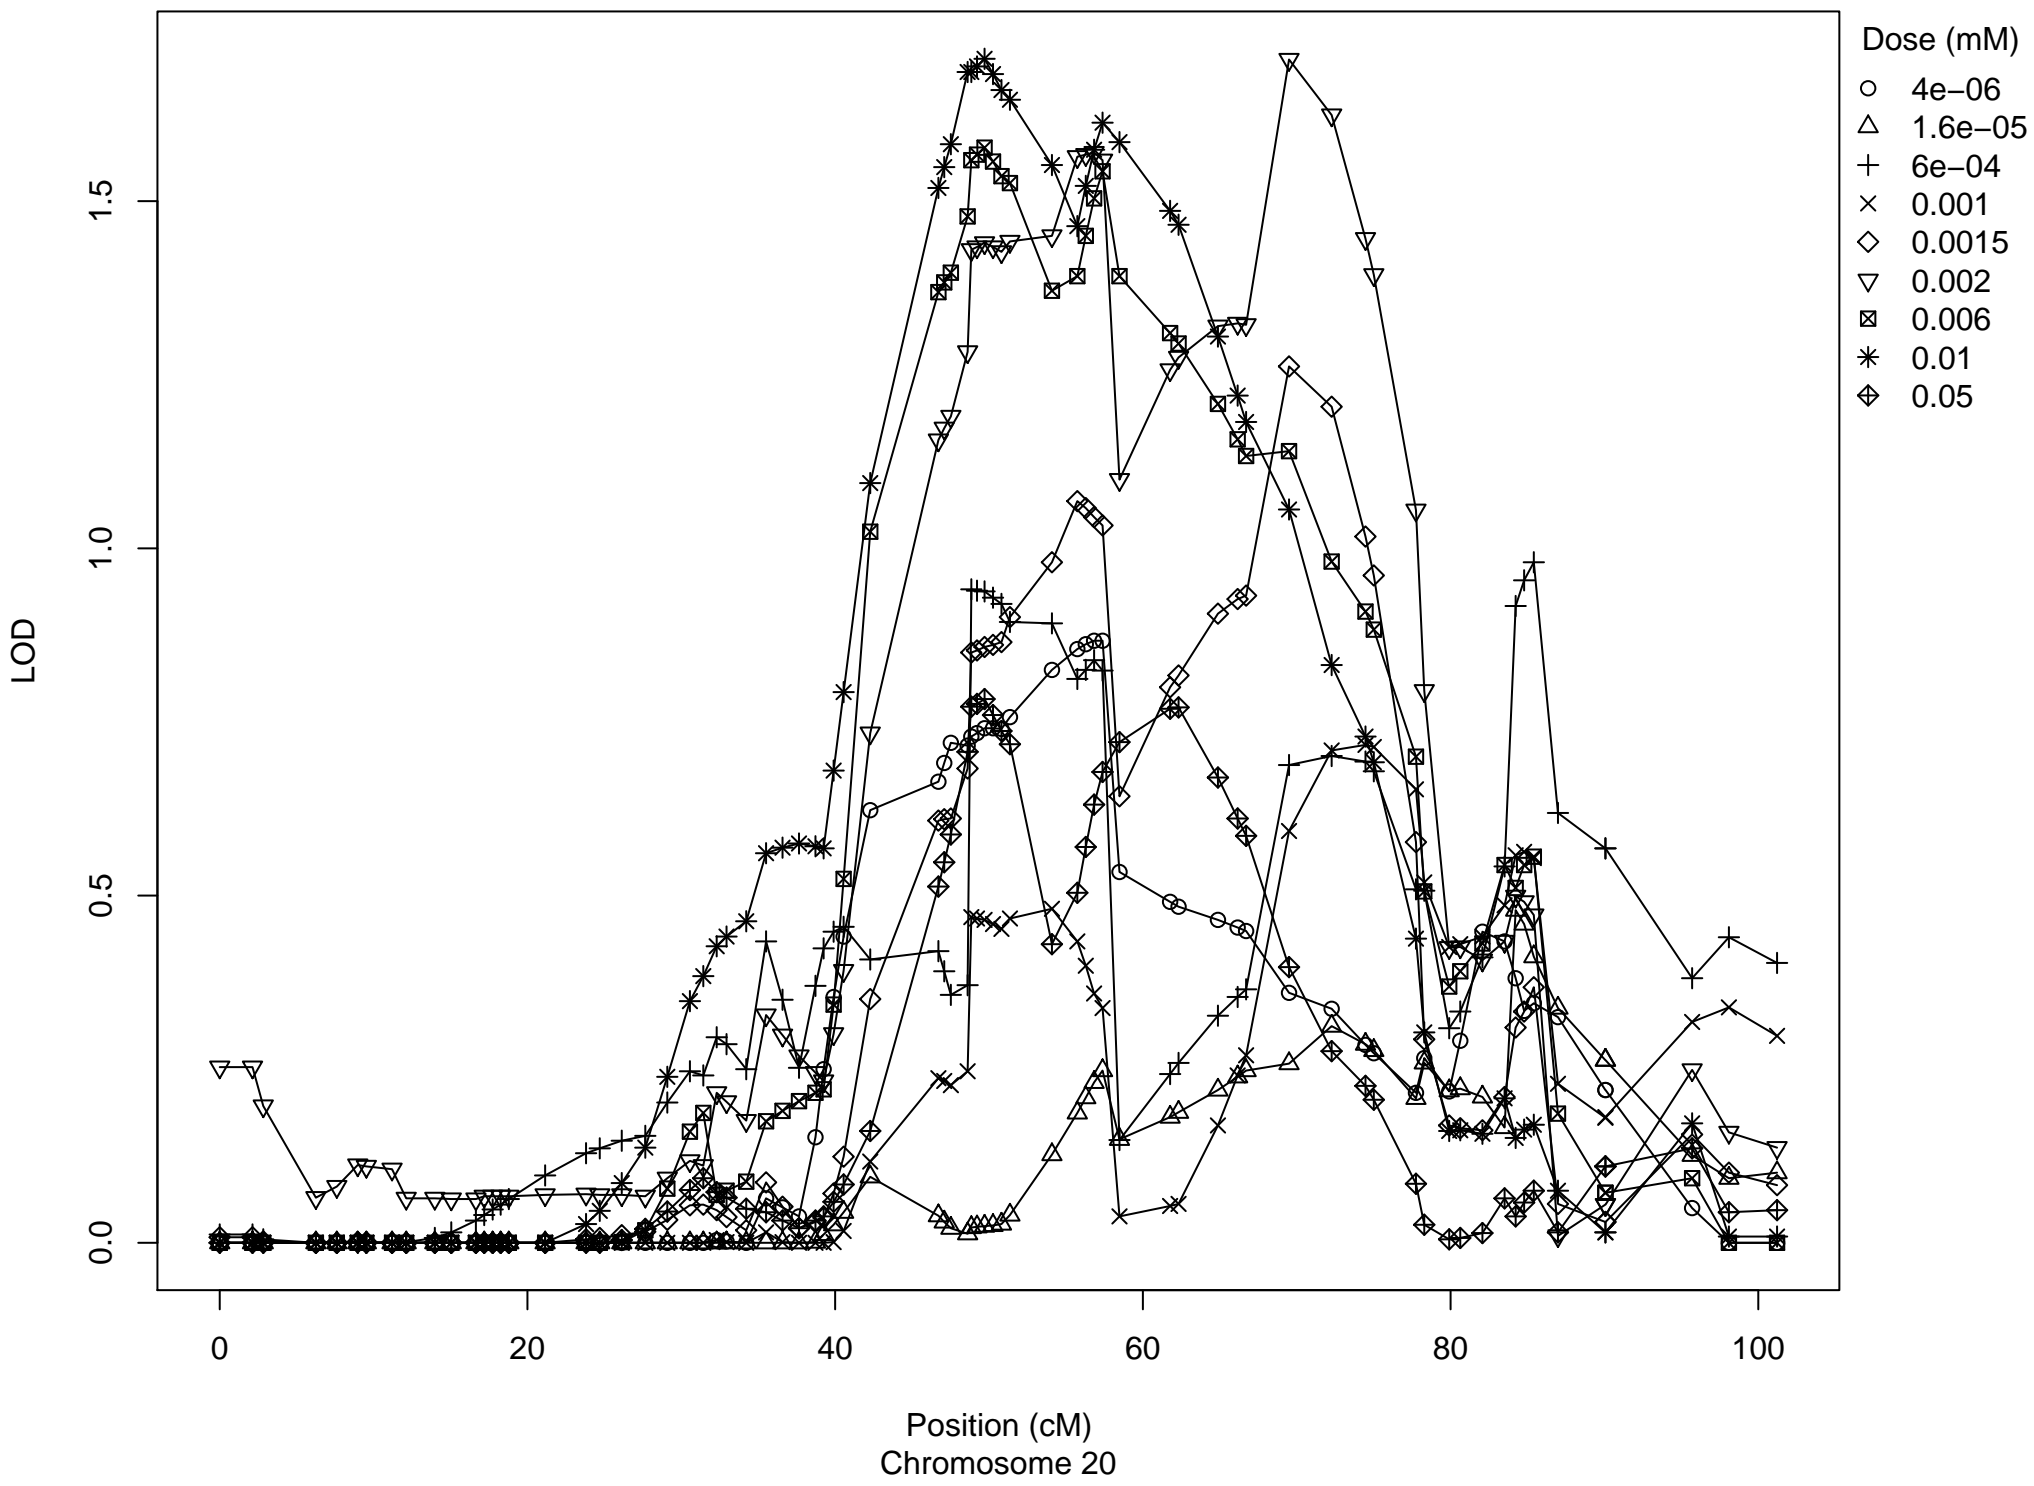



# Irinotecan (CPT11)

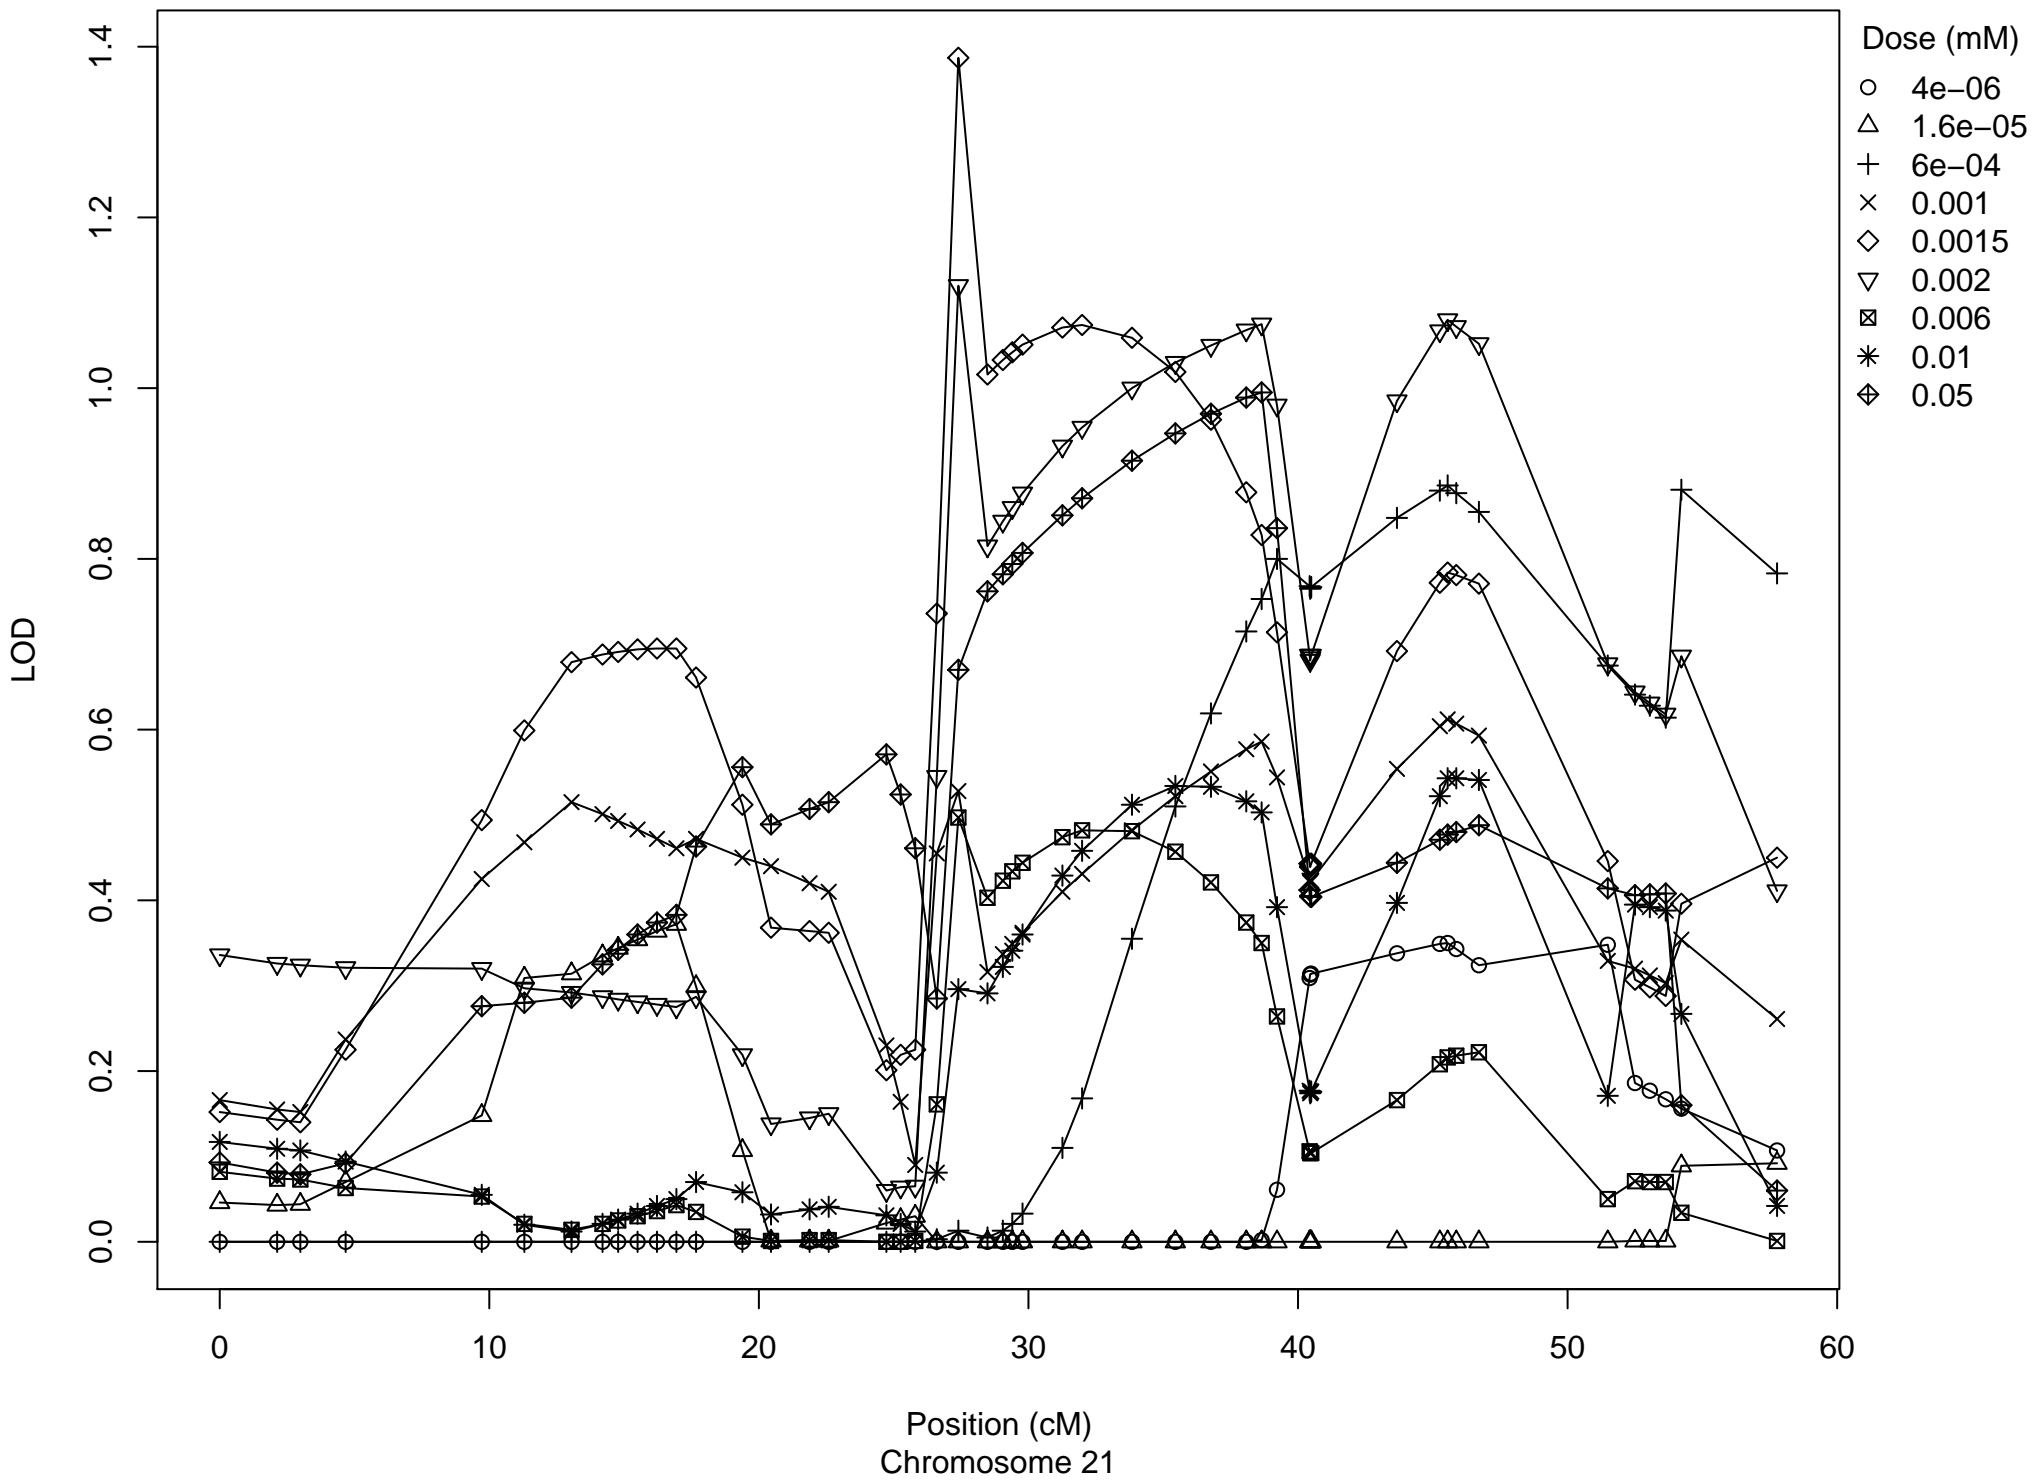





# Topotecan (TPT)

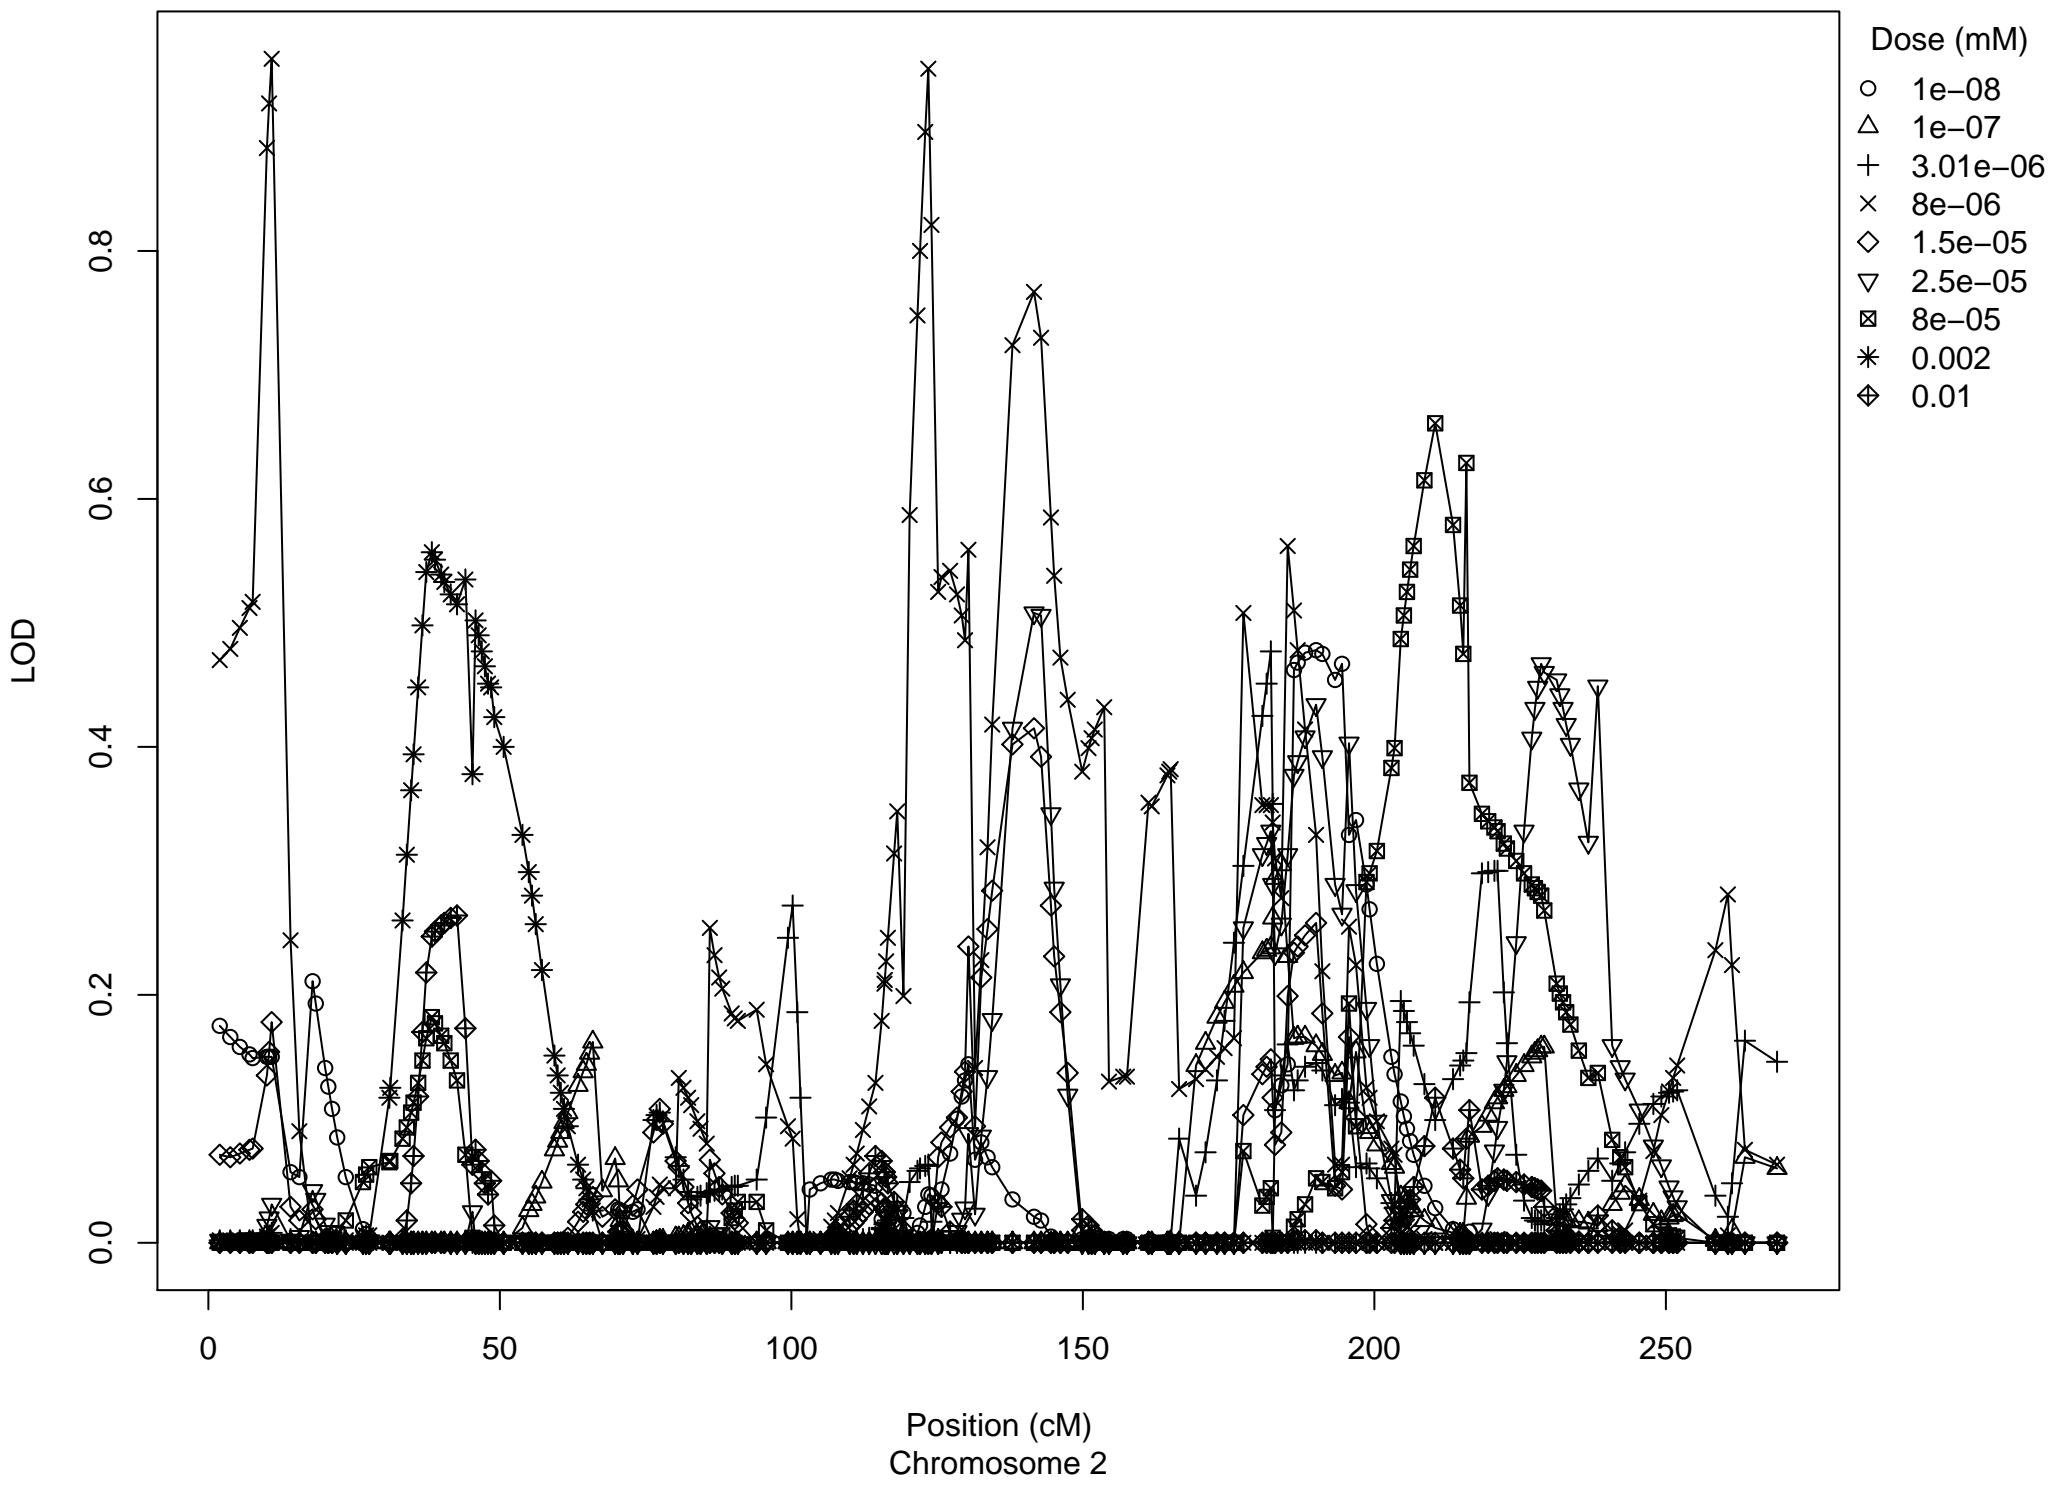

# Topotecan (TPT)

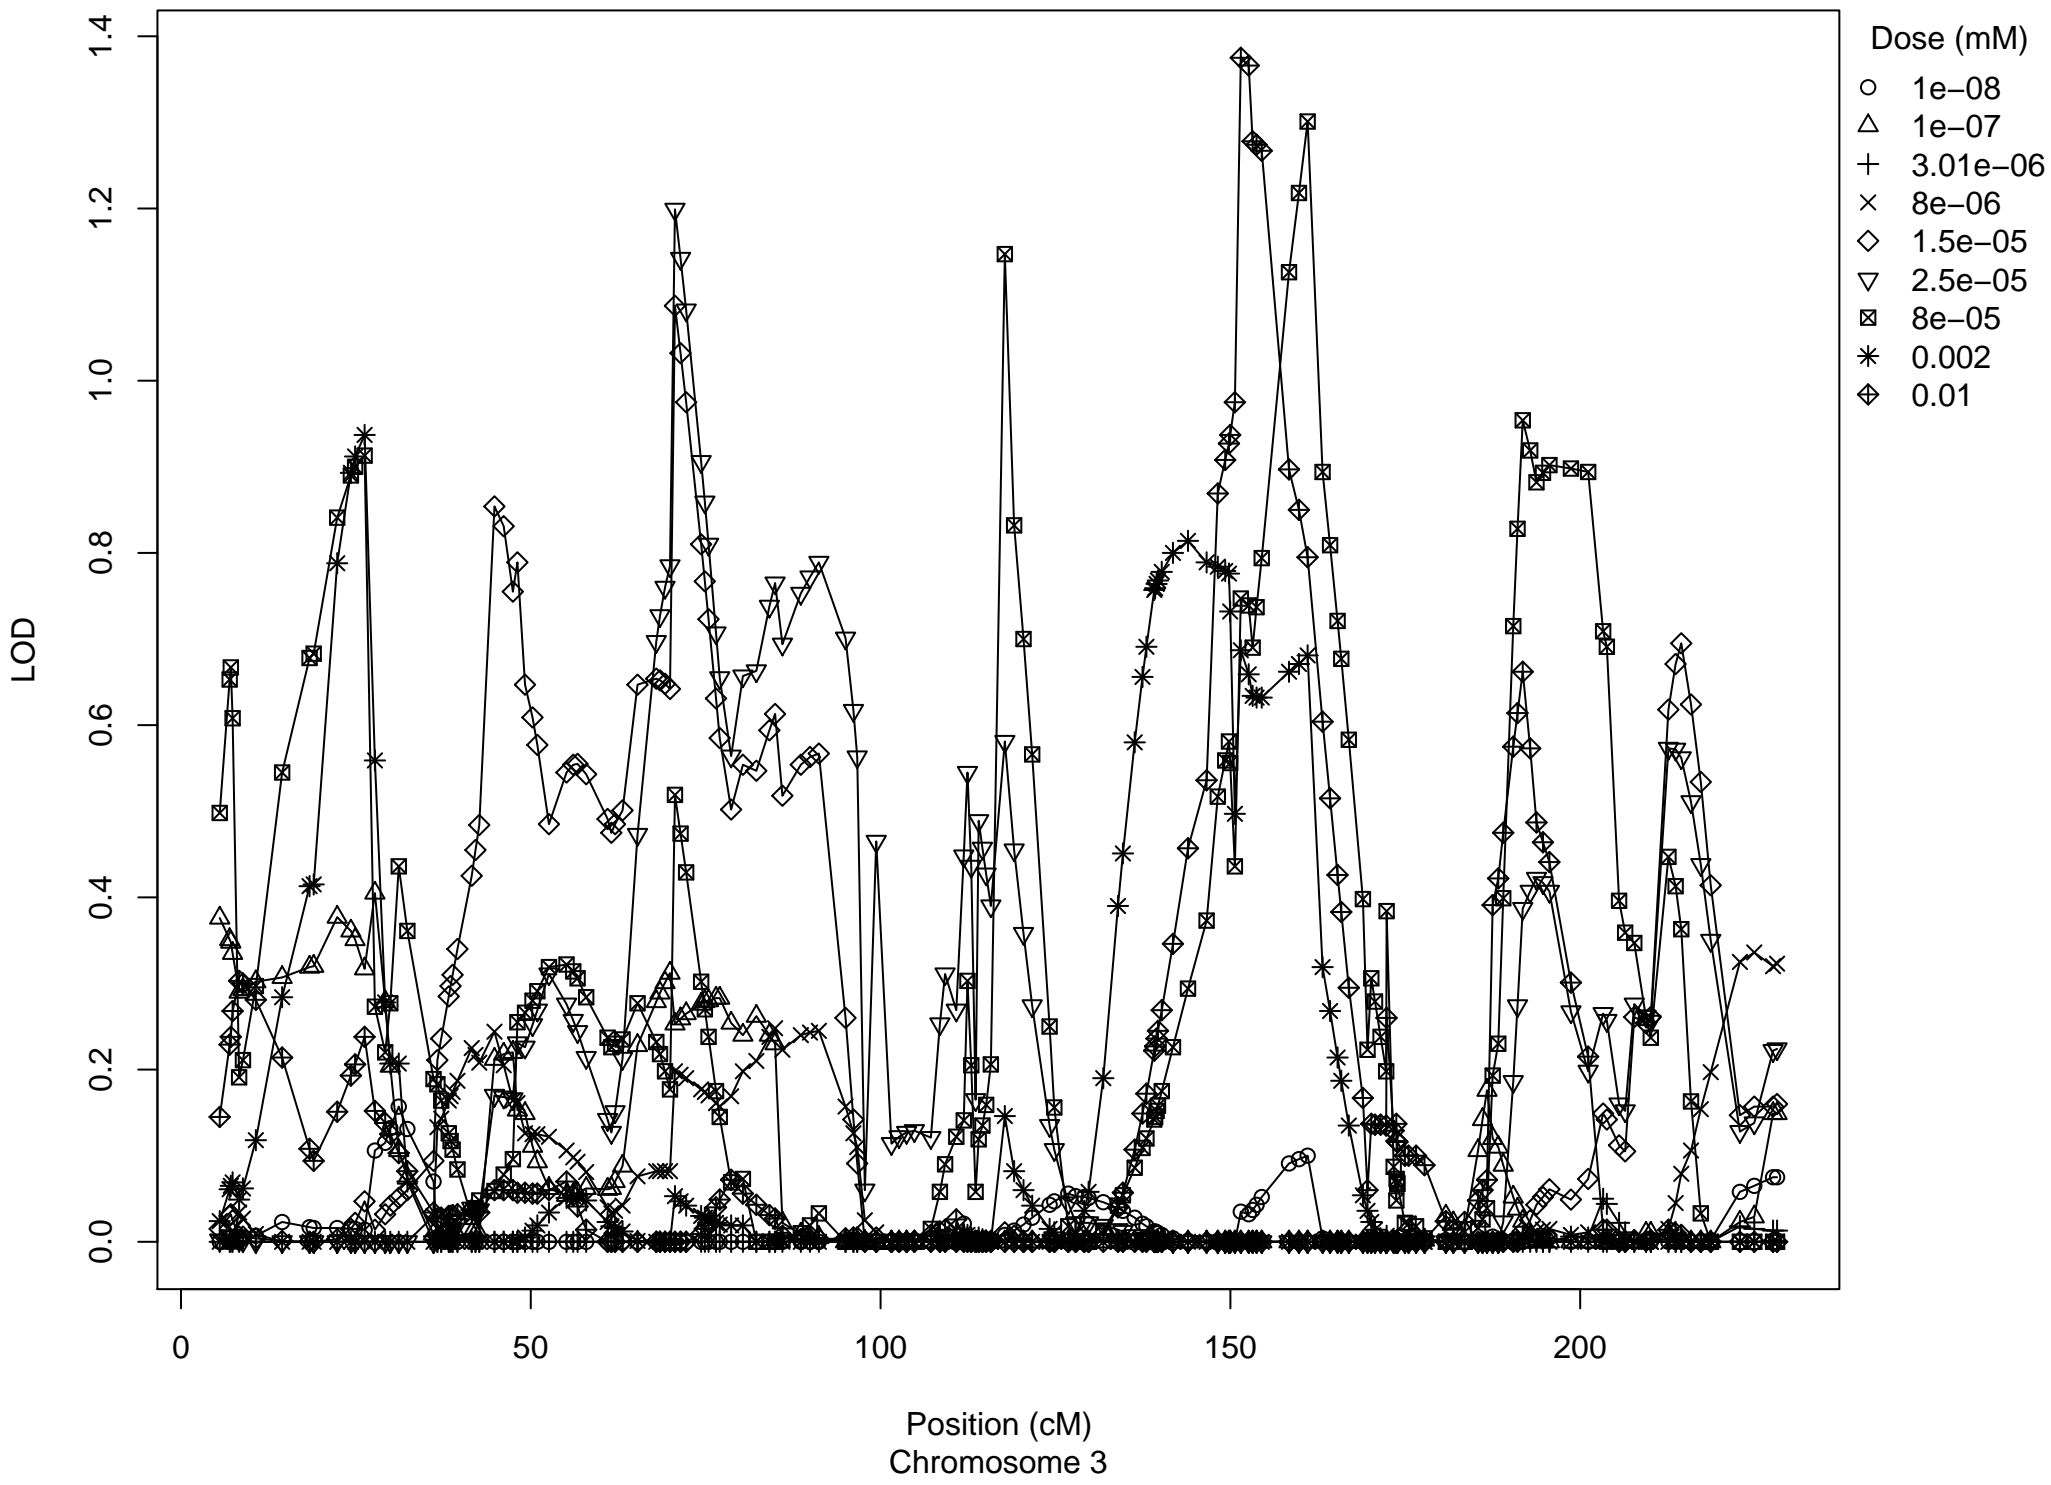



# Topotecan (TPT)

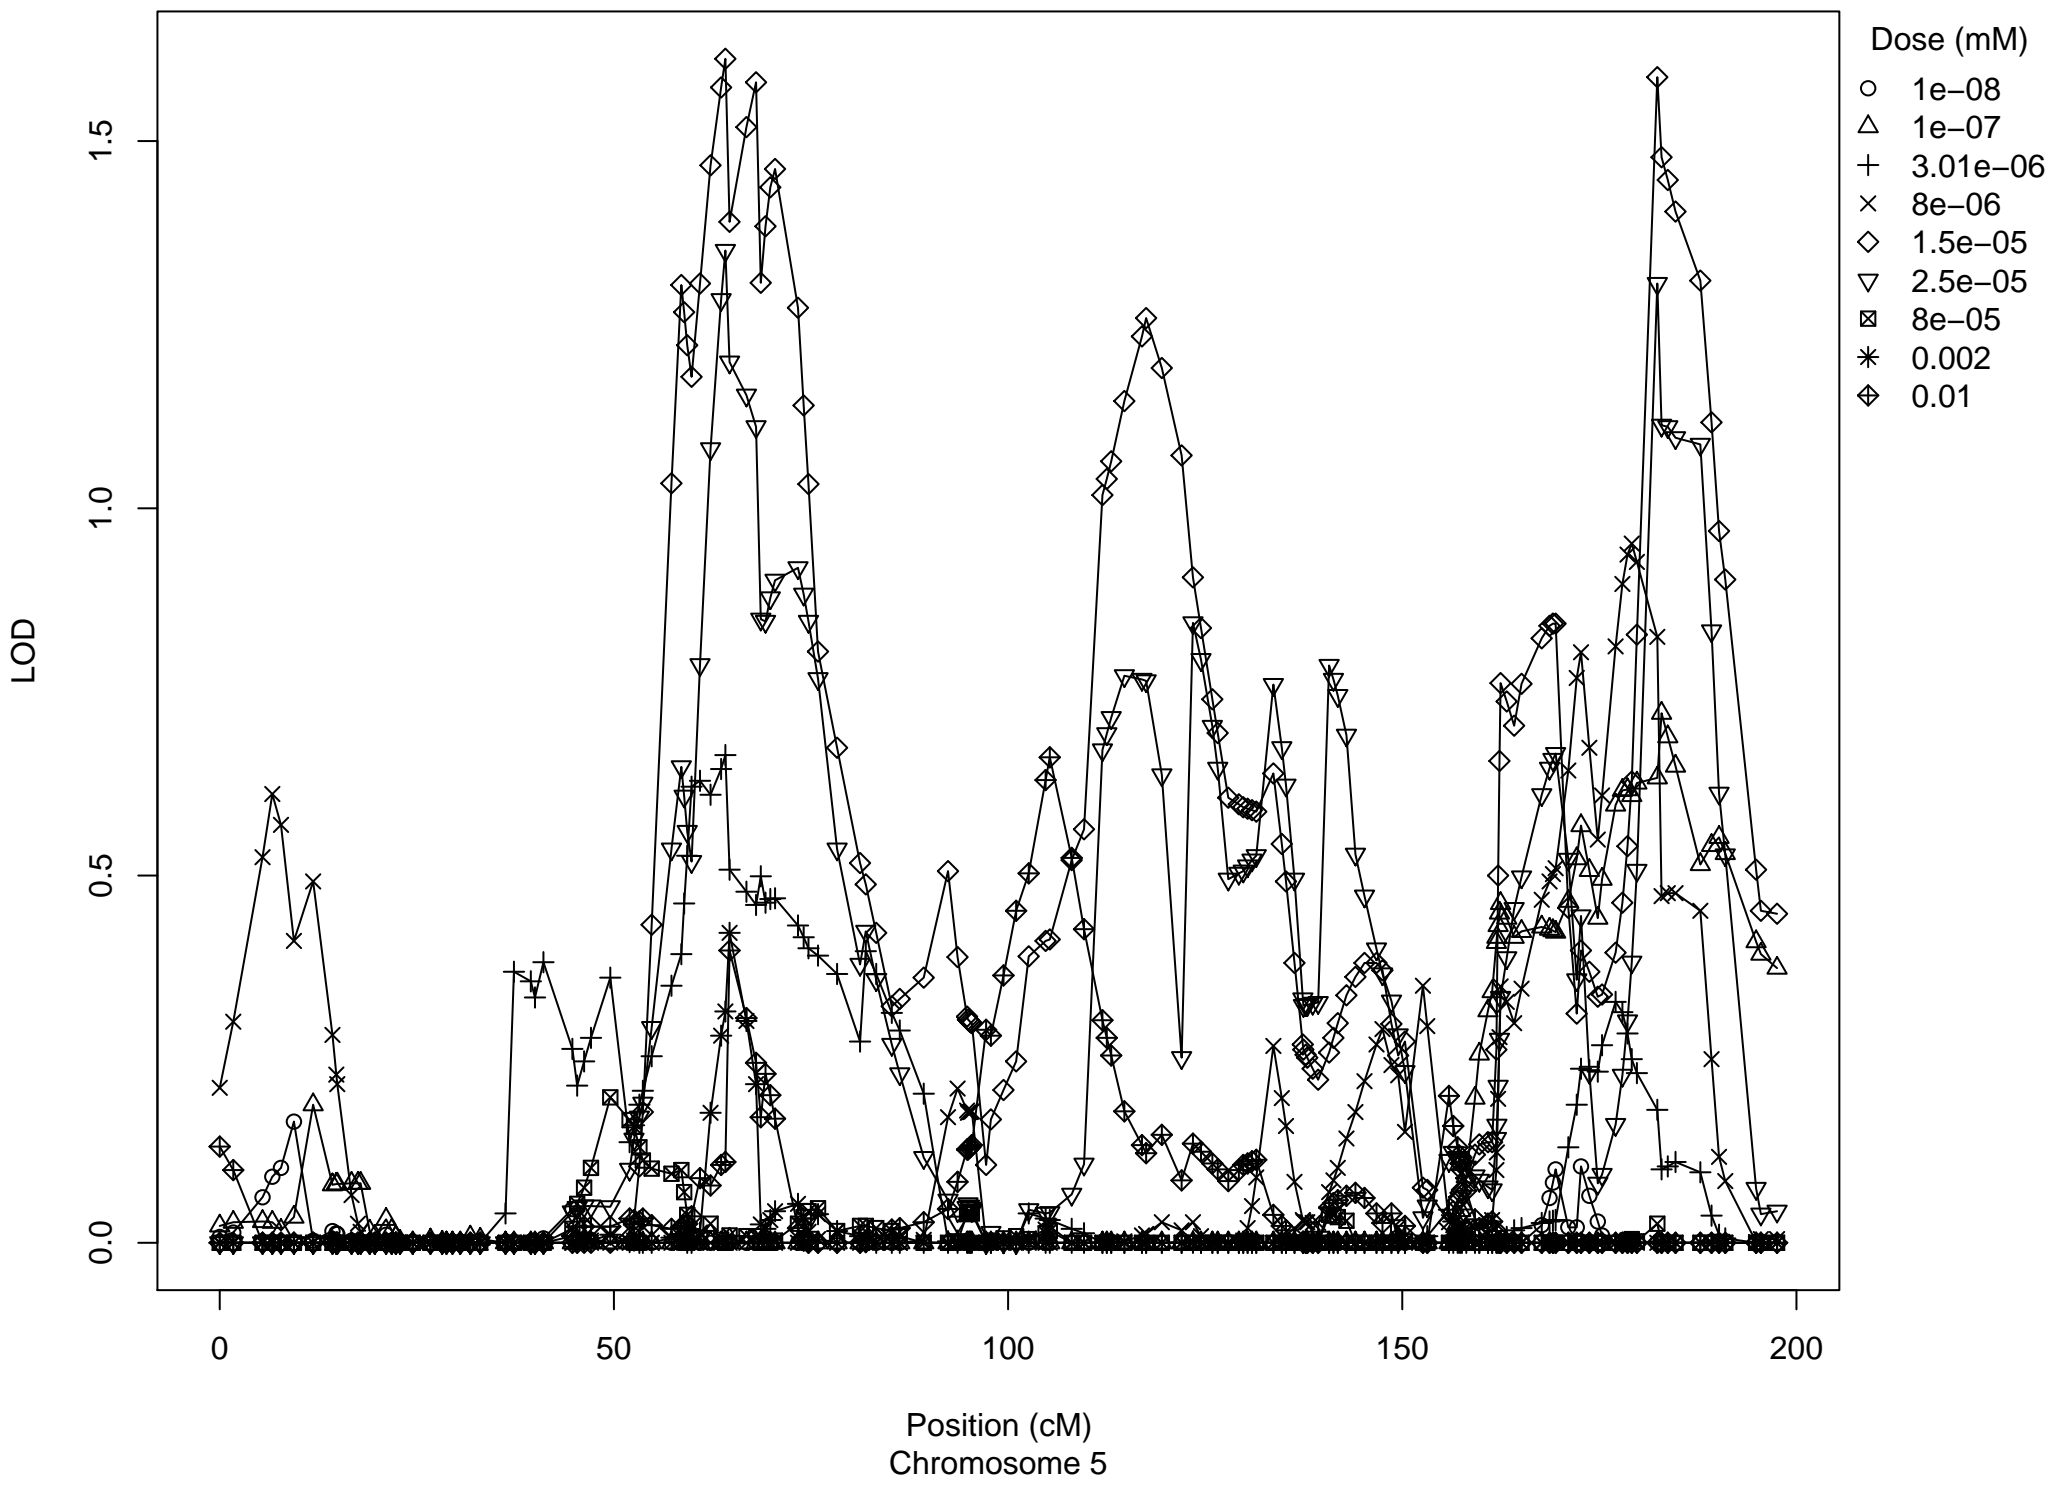

# Topotecan (TPT)

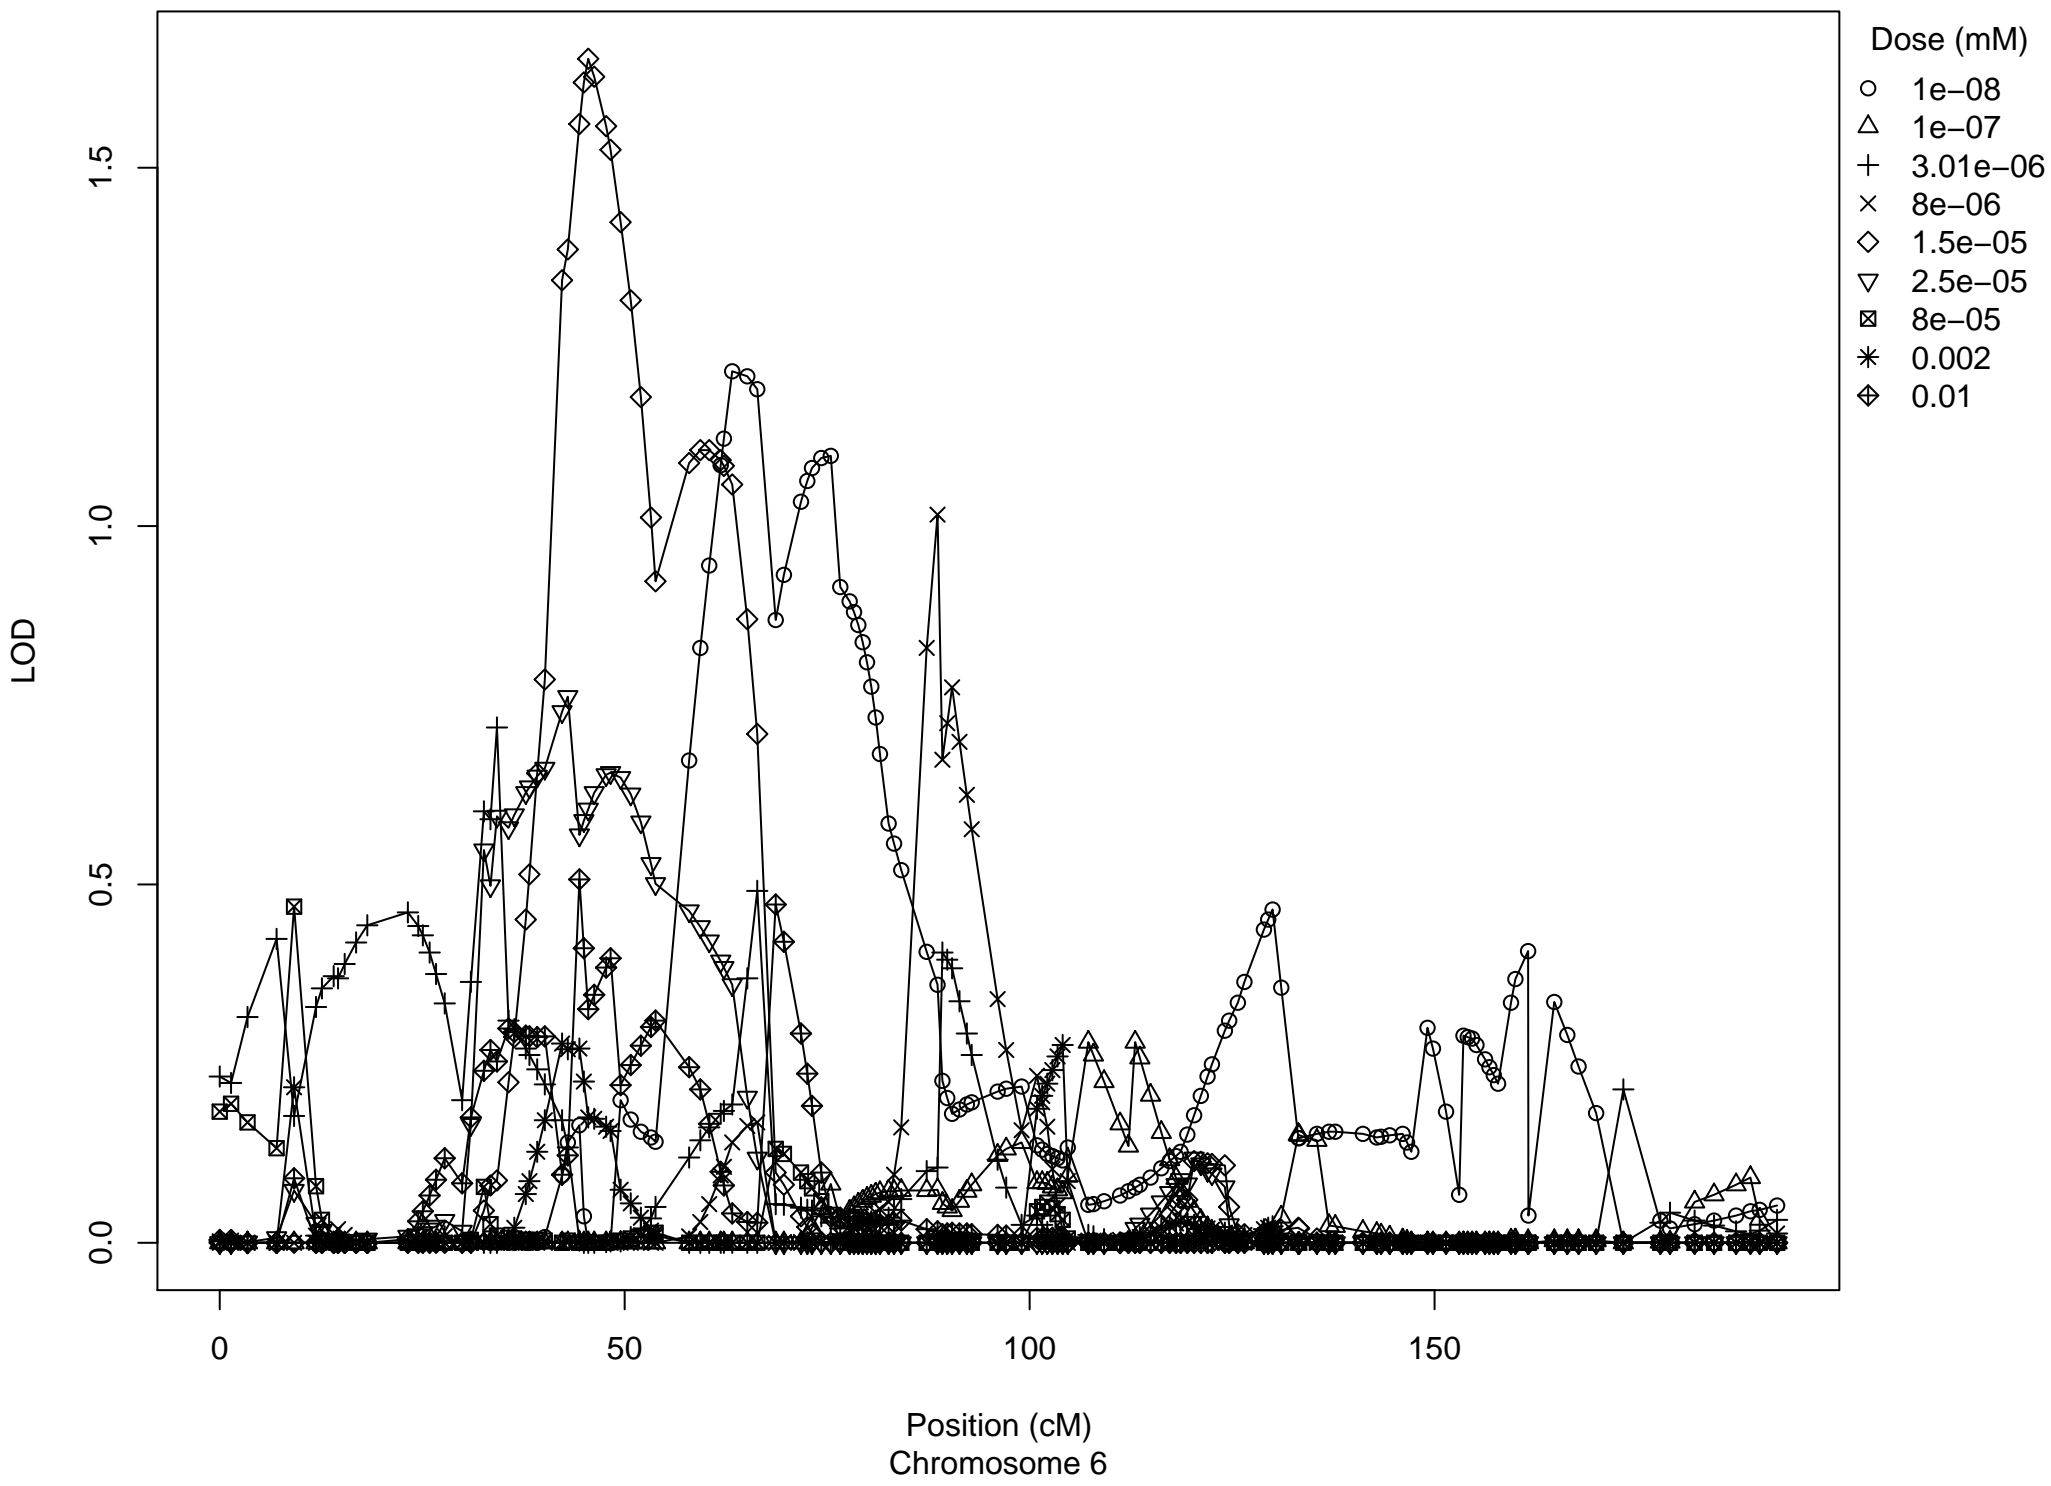









# Topotecan (TPT)

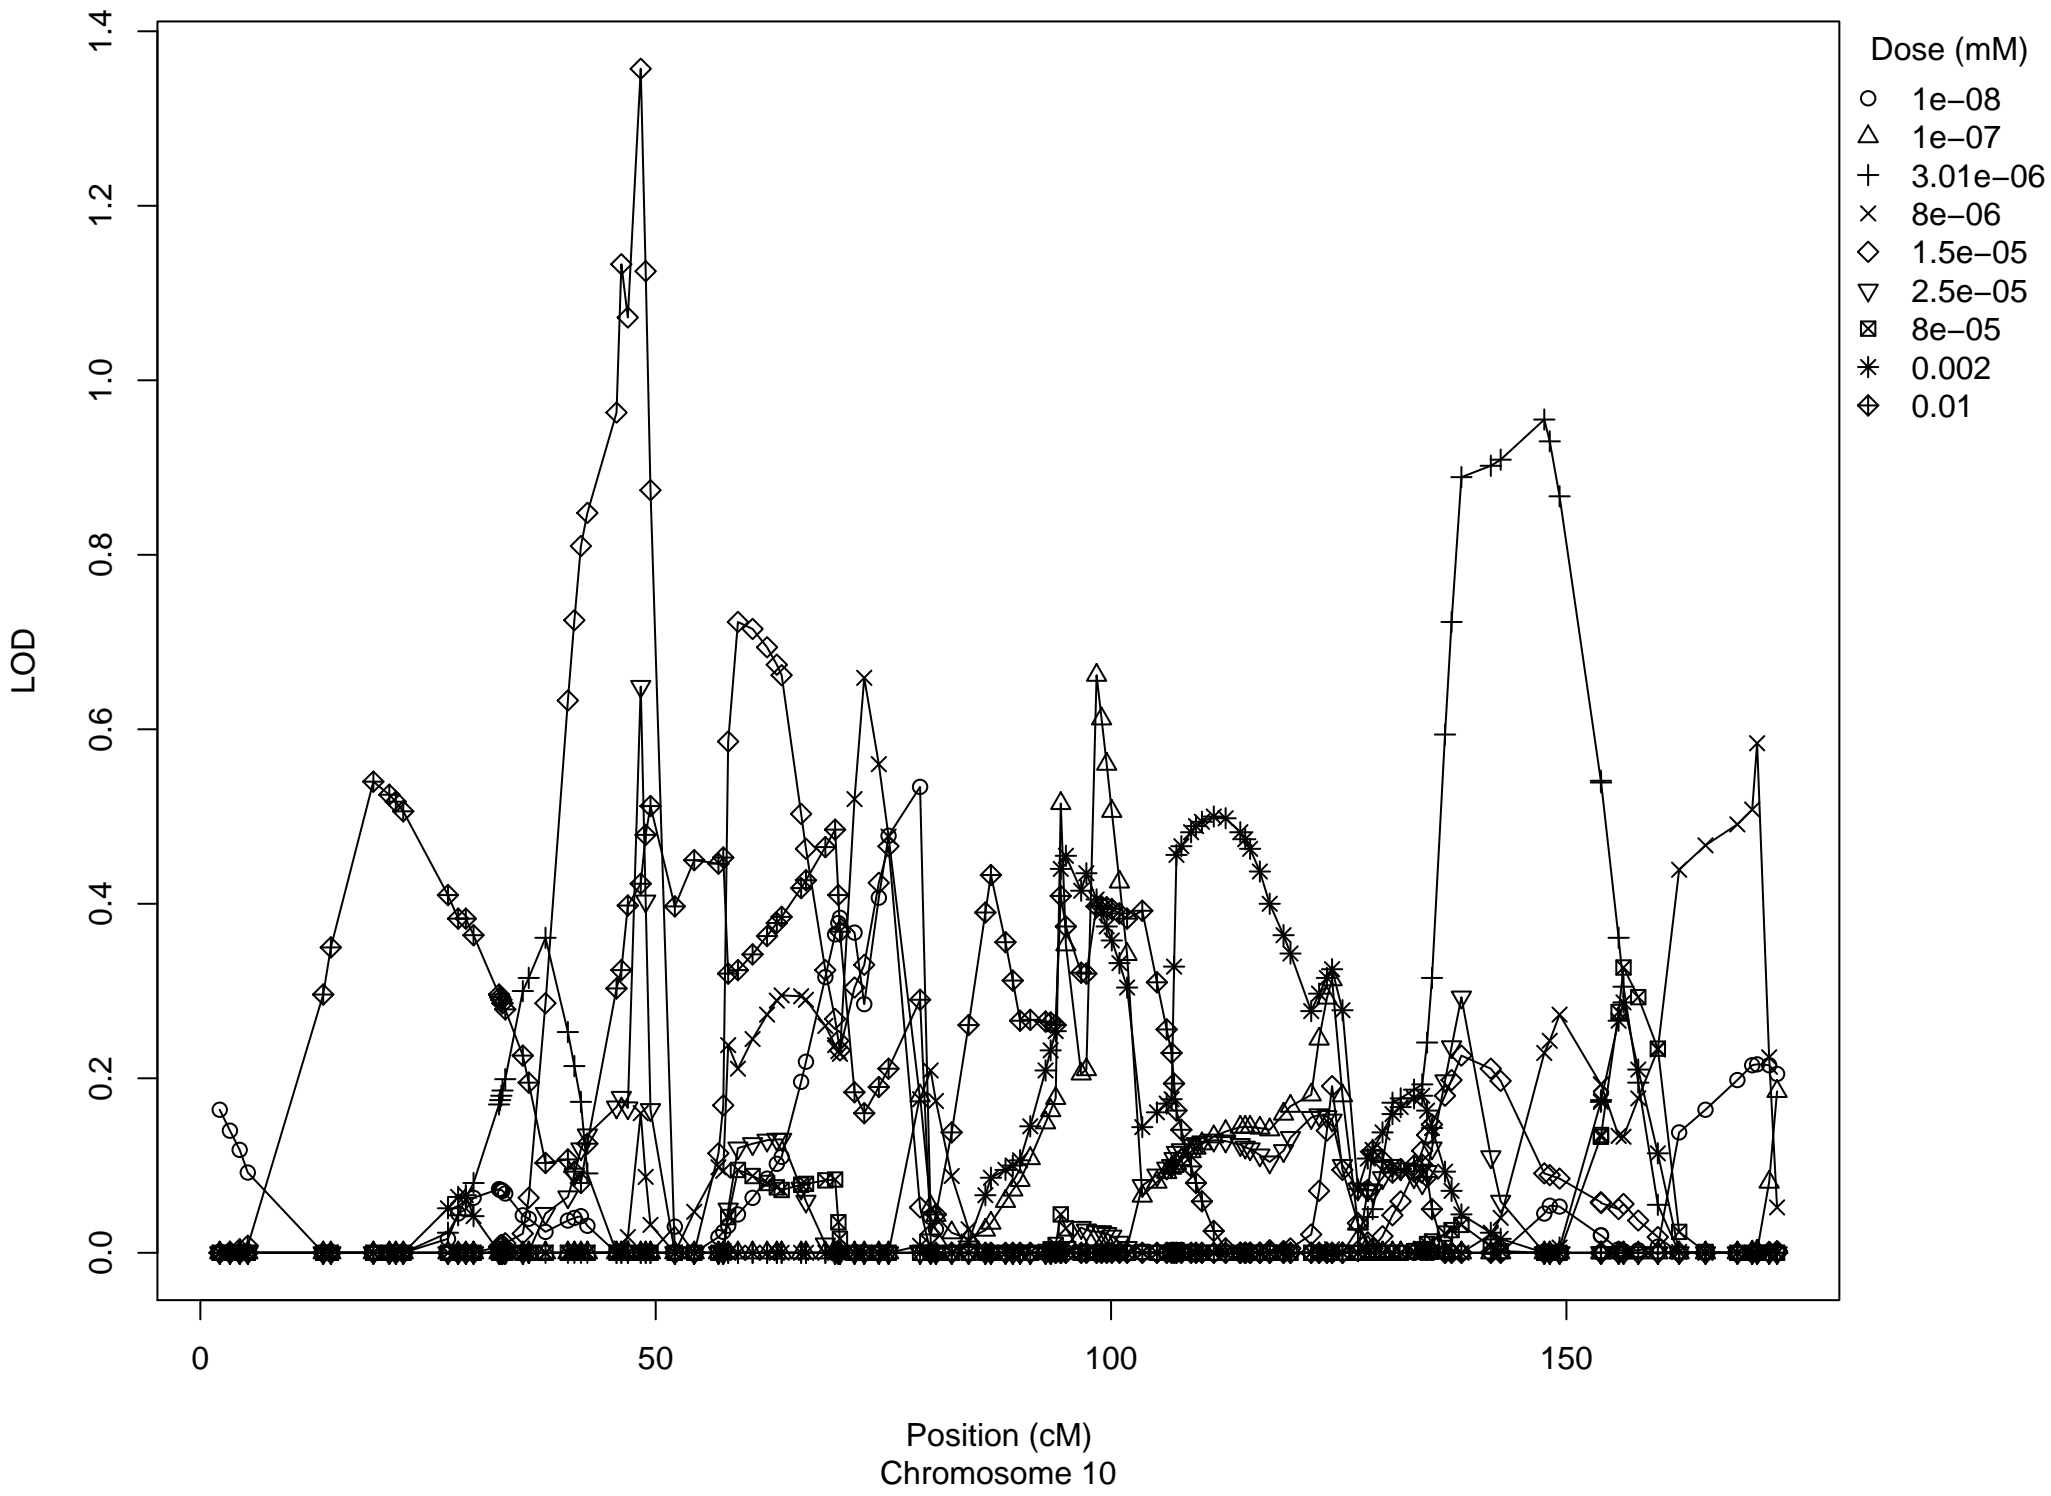

# Topotecan (TPT)

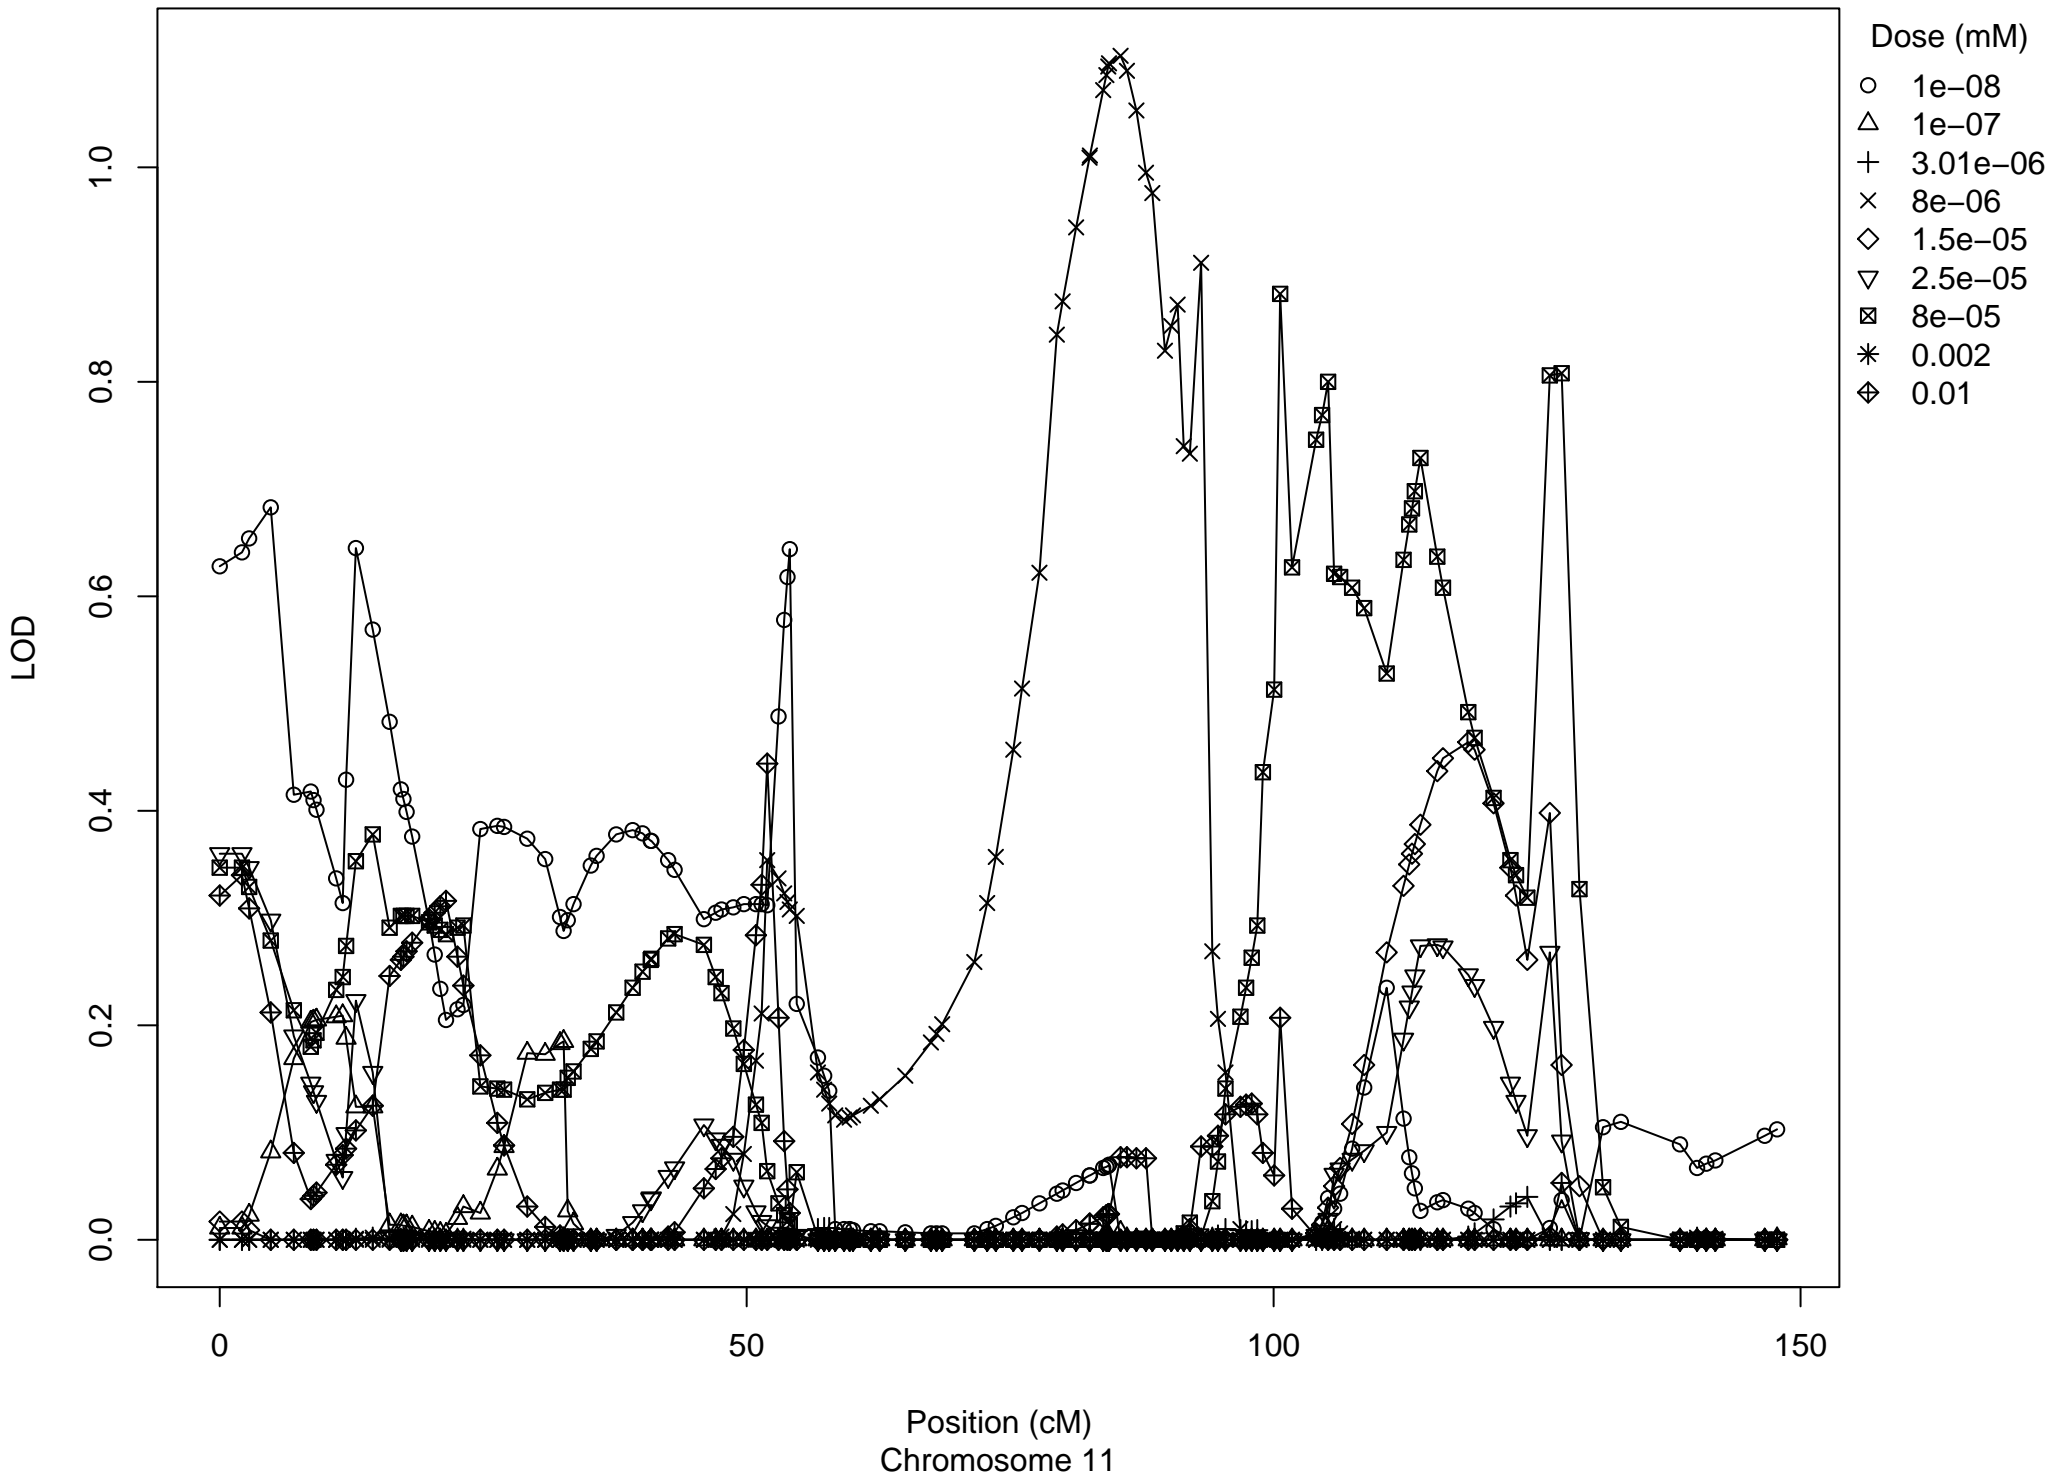

# Topotecan (TPT)

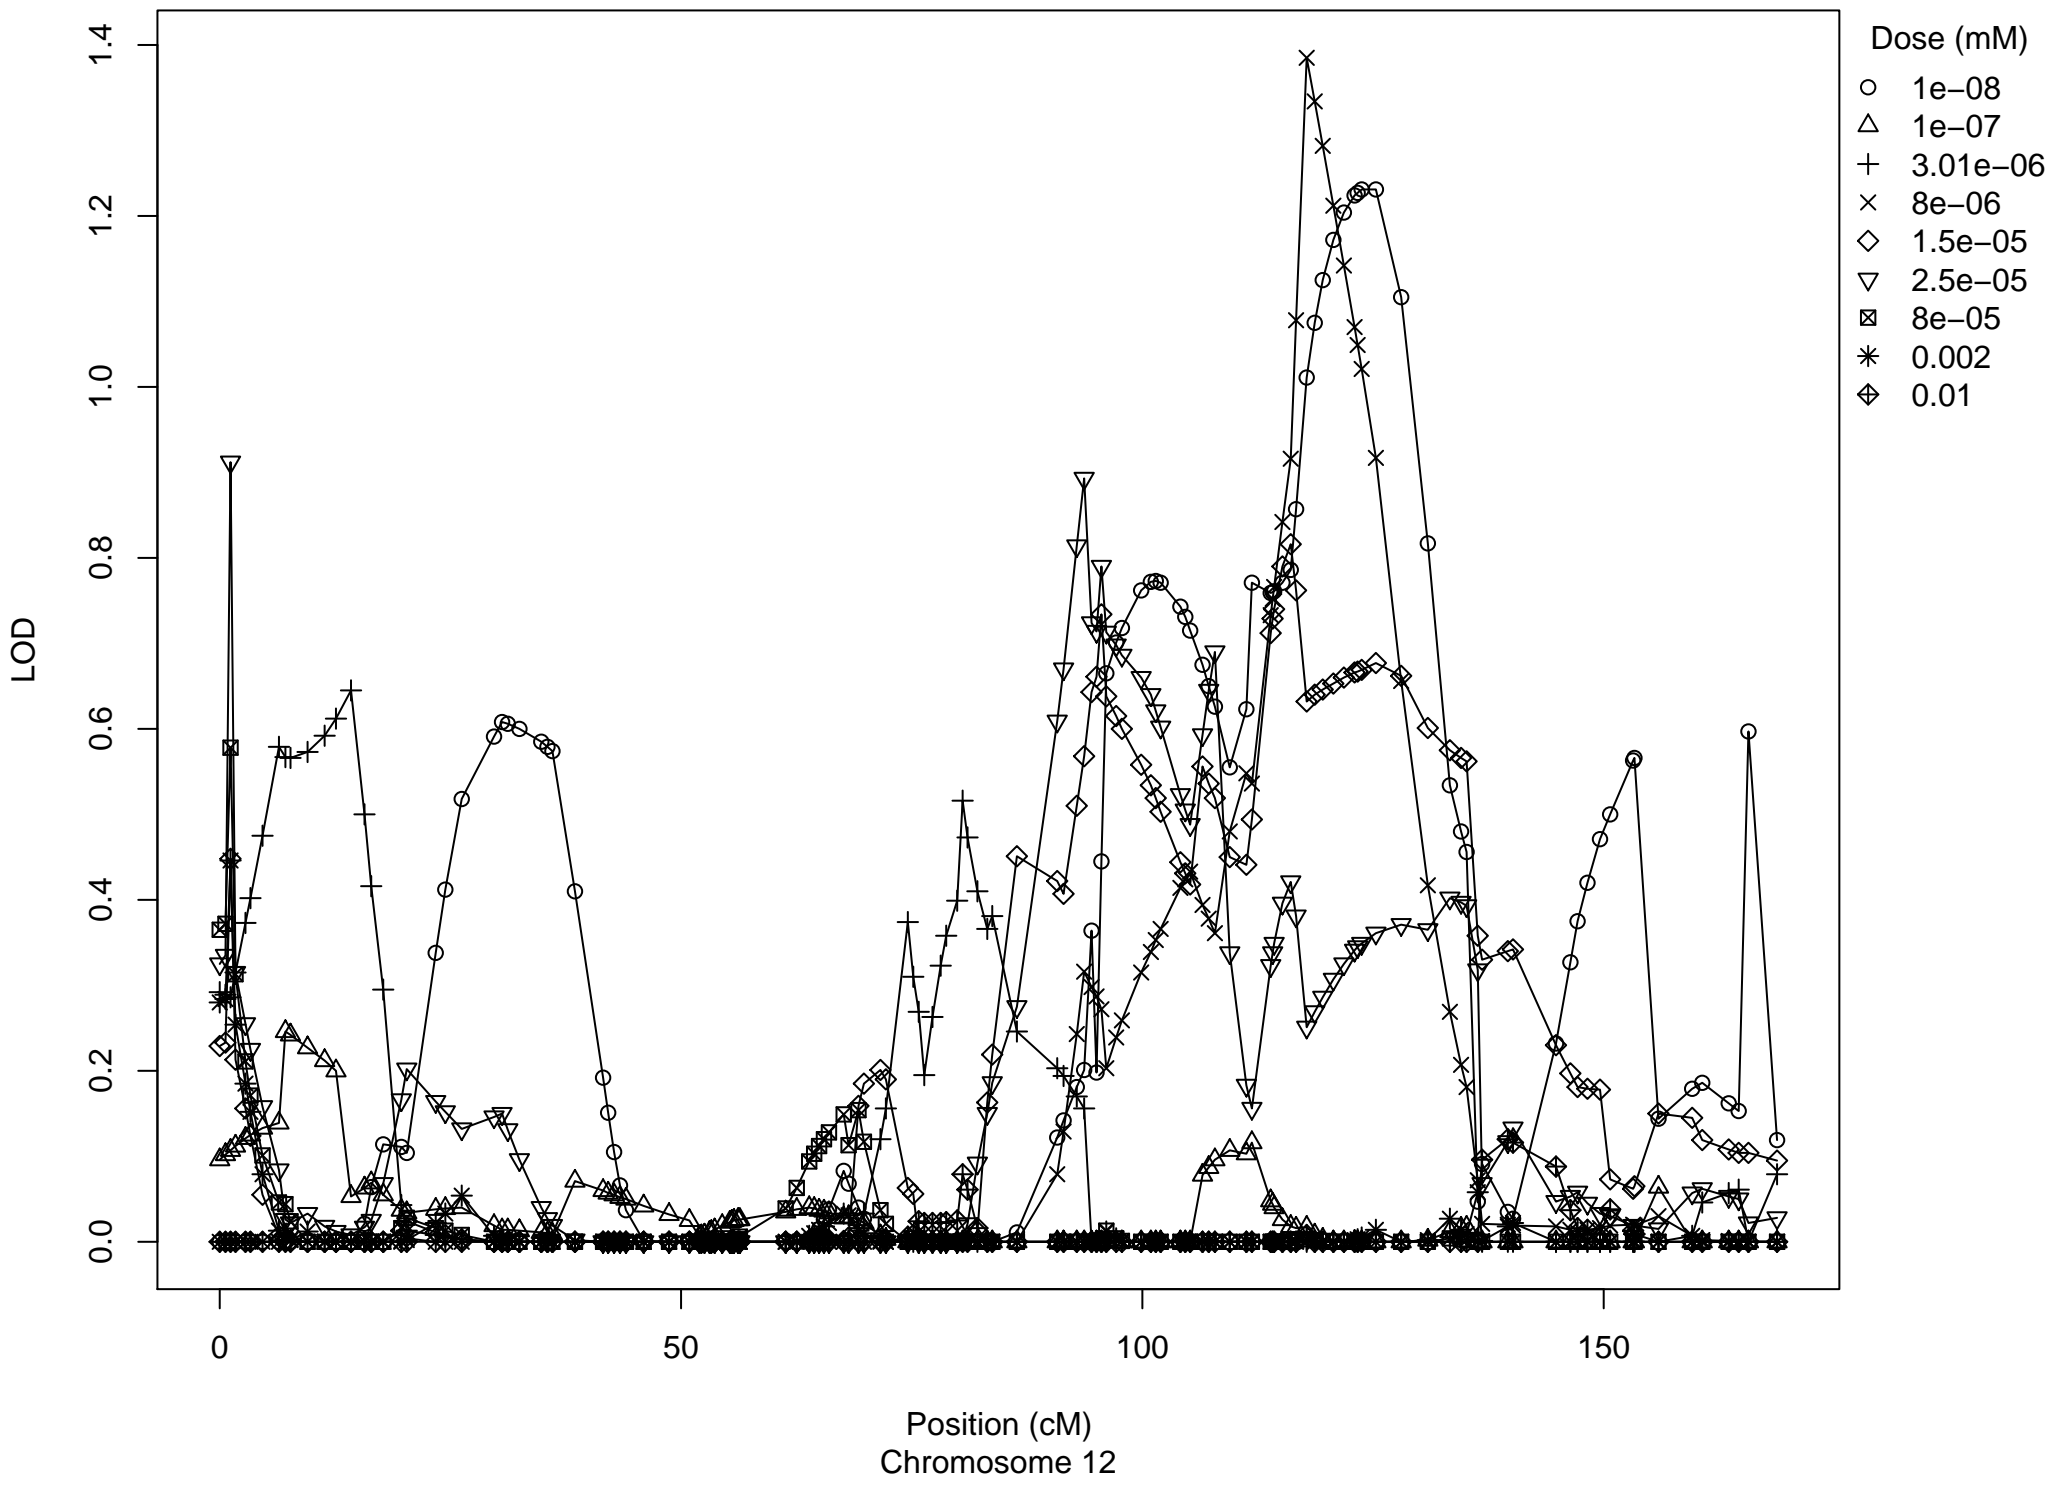

# Topotecan (TPT)

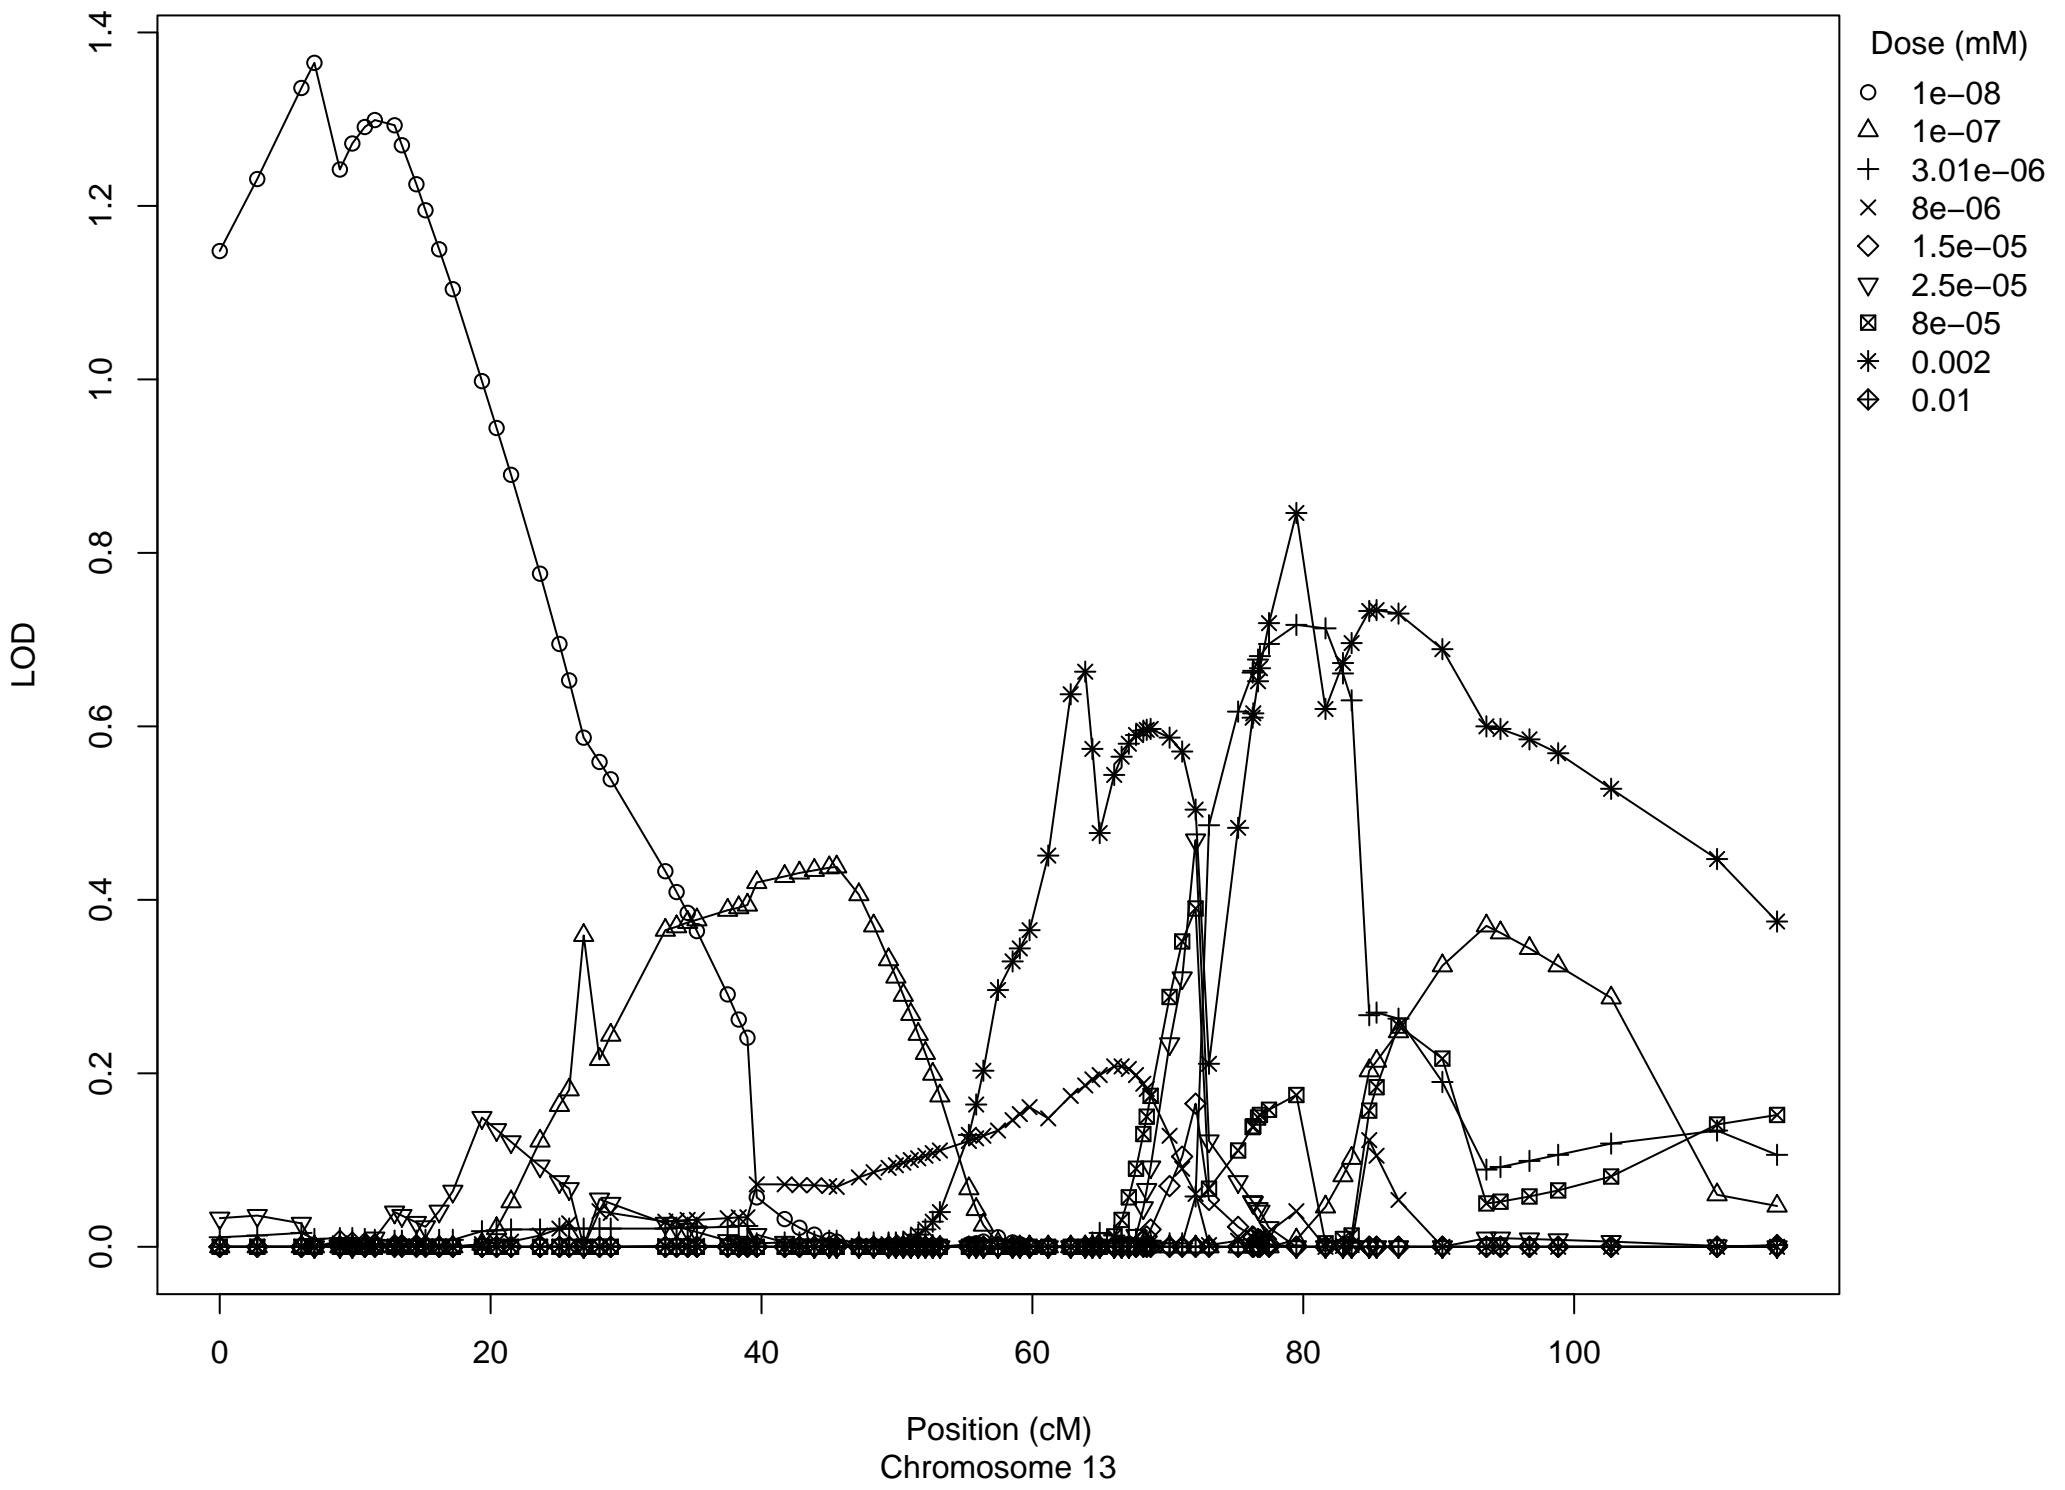





# Topotecan (TPT)

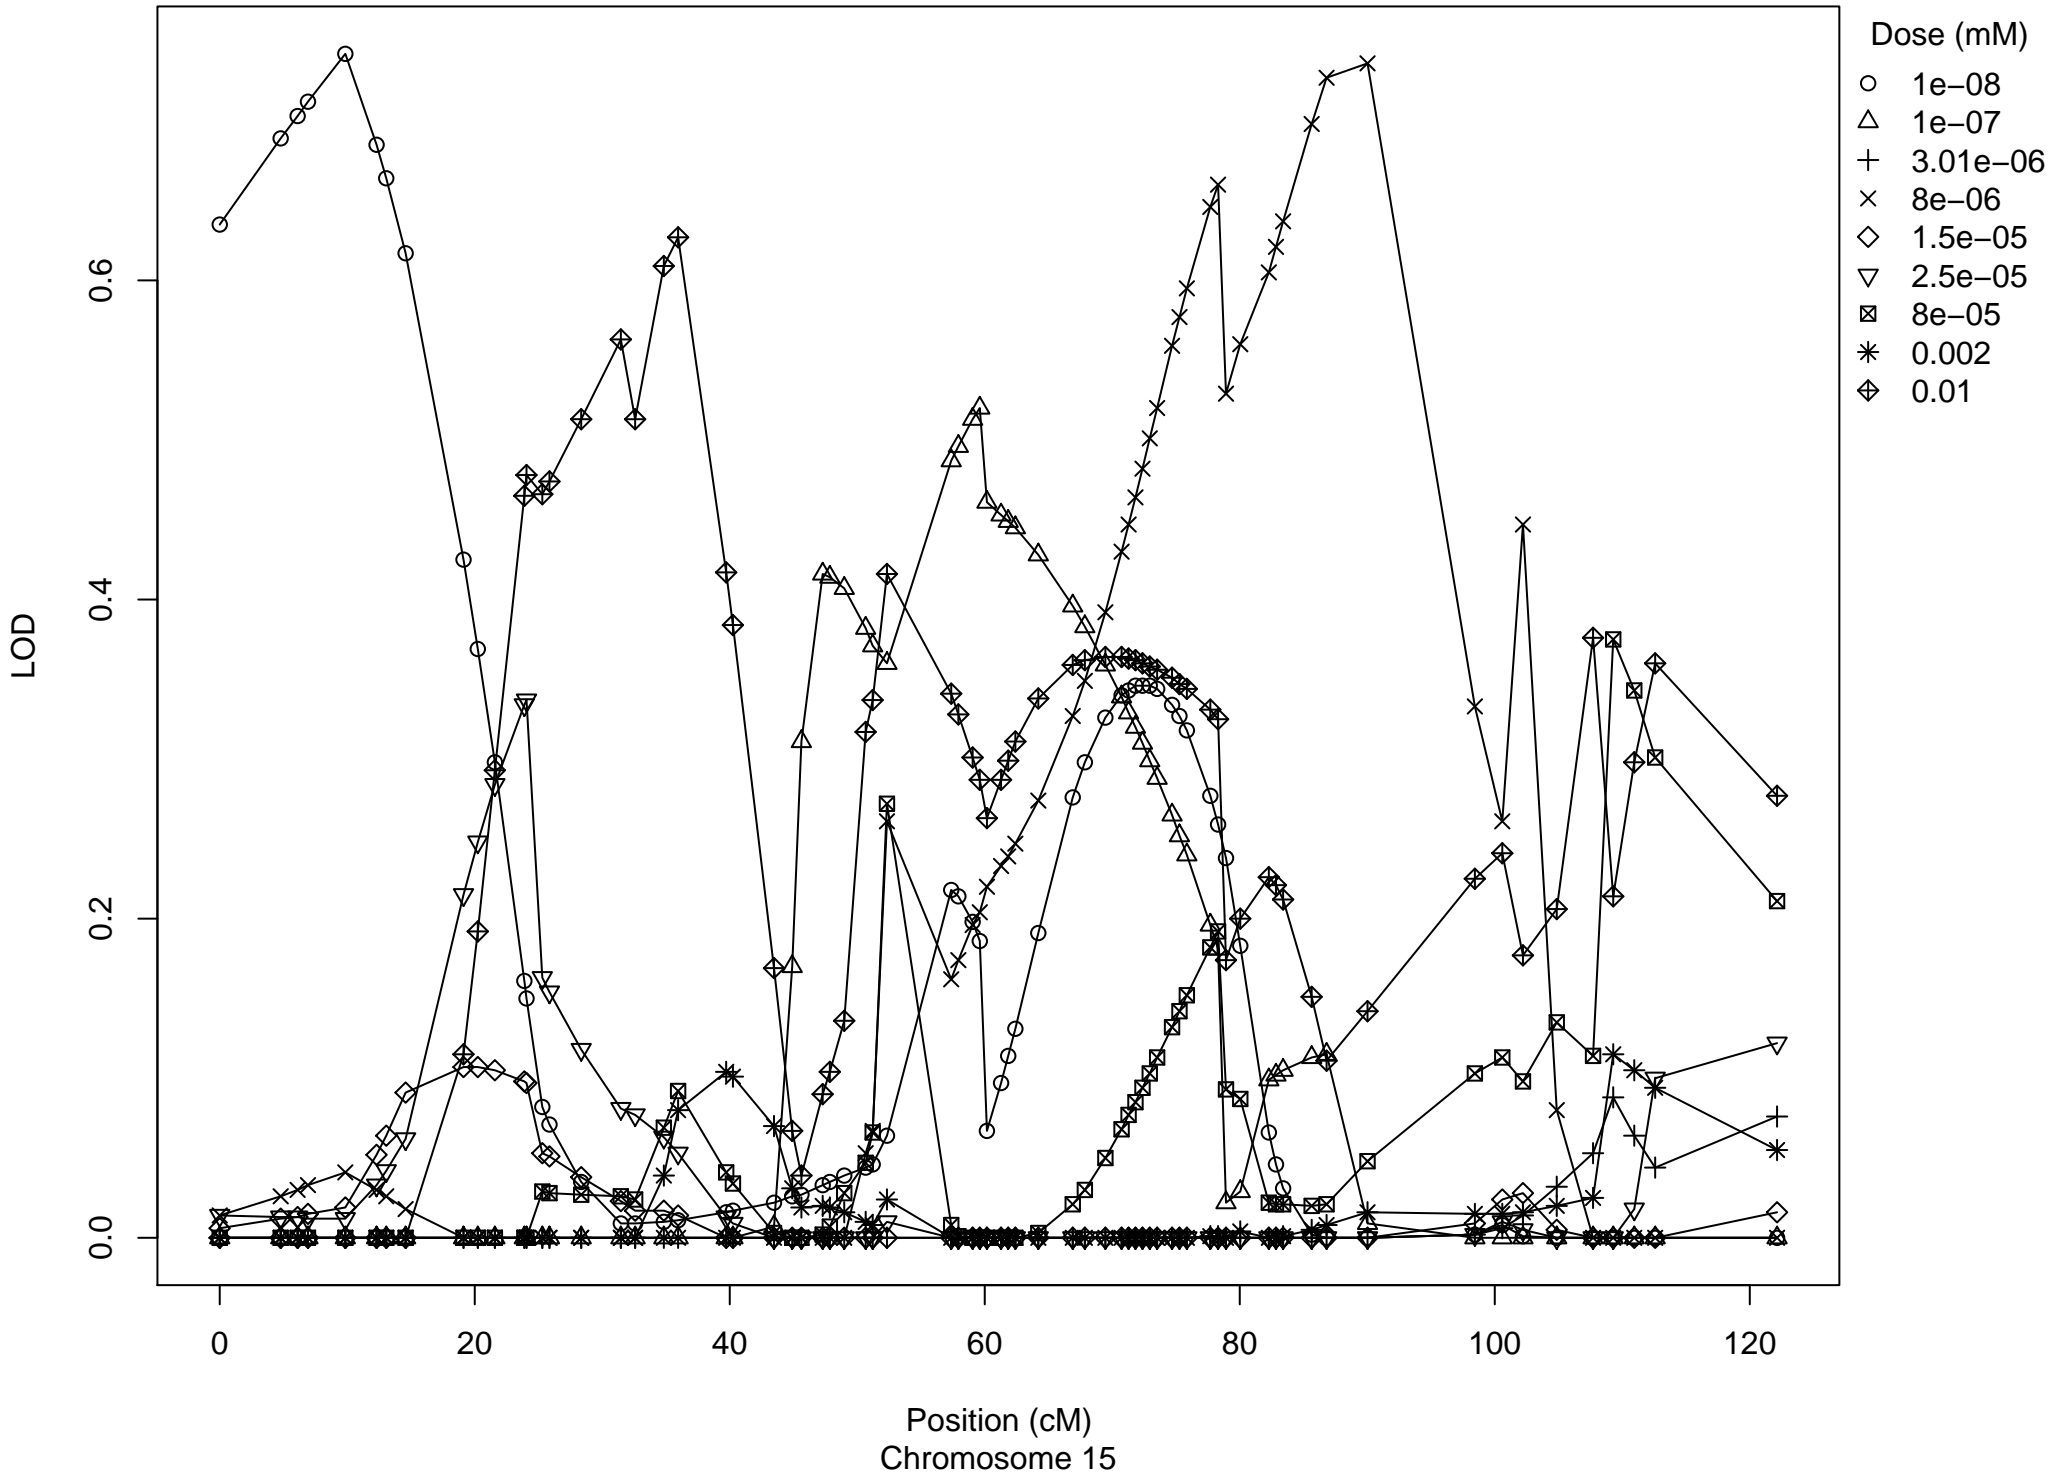

# Topotecan (TPT)

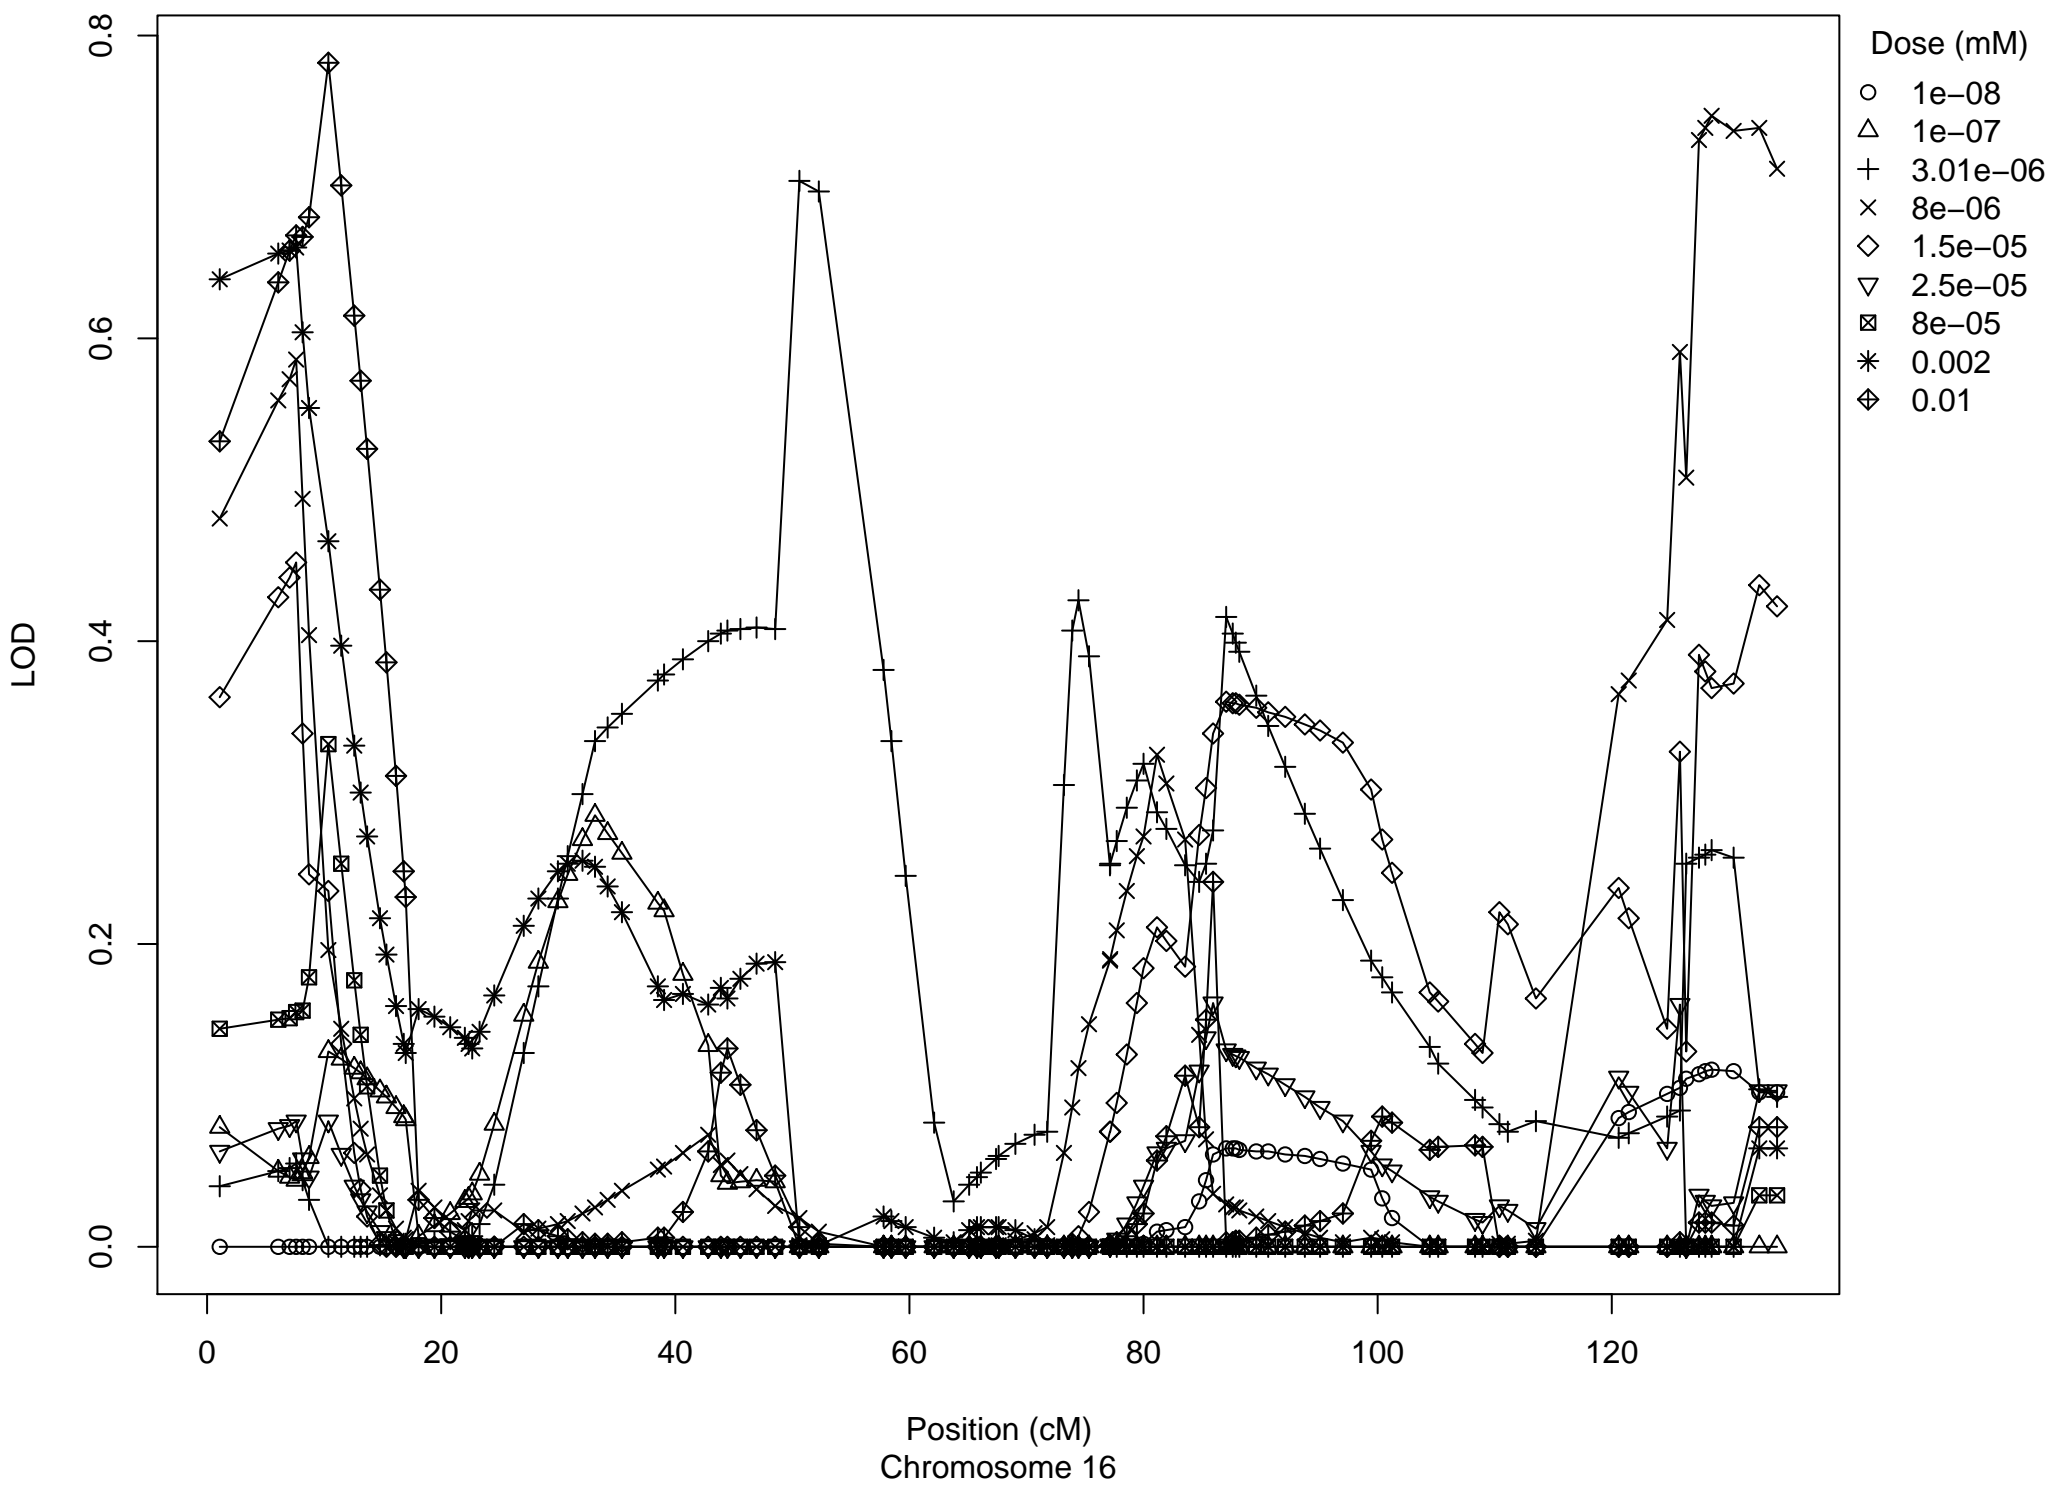



# Topotecan (TPT)

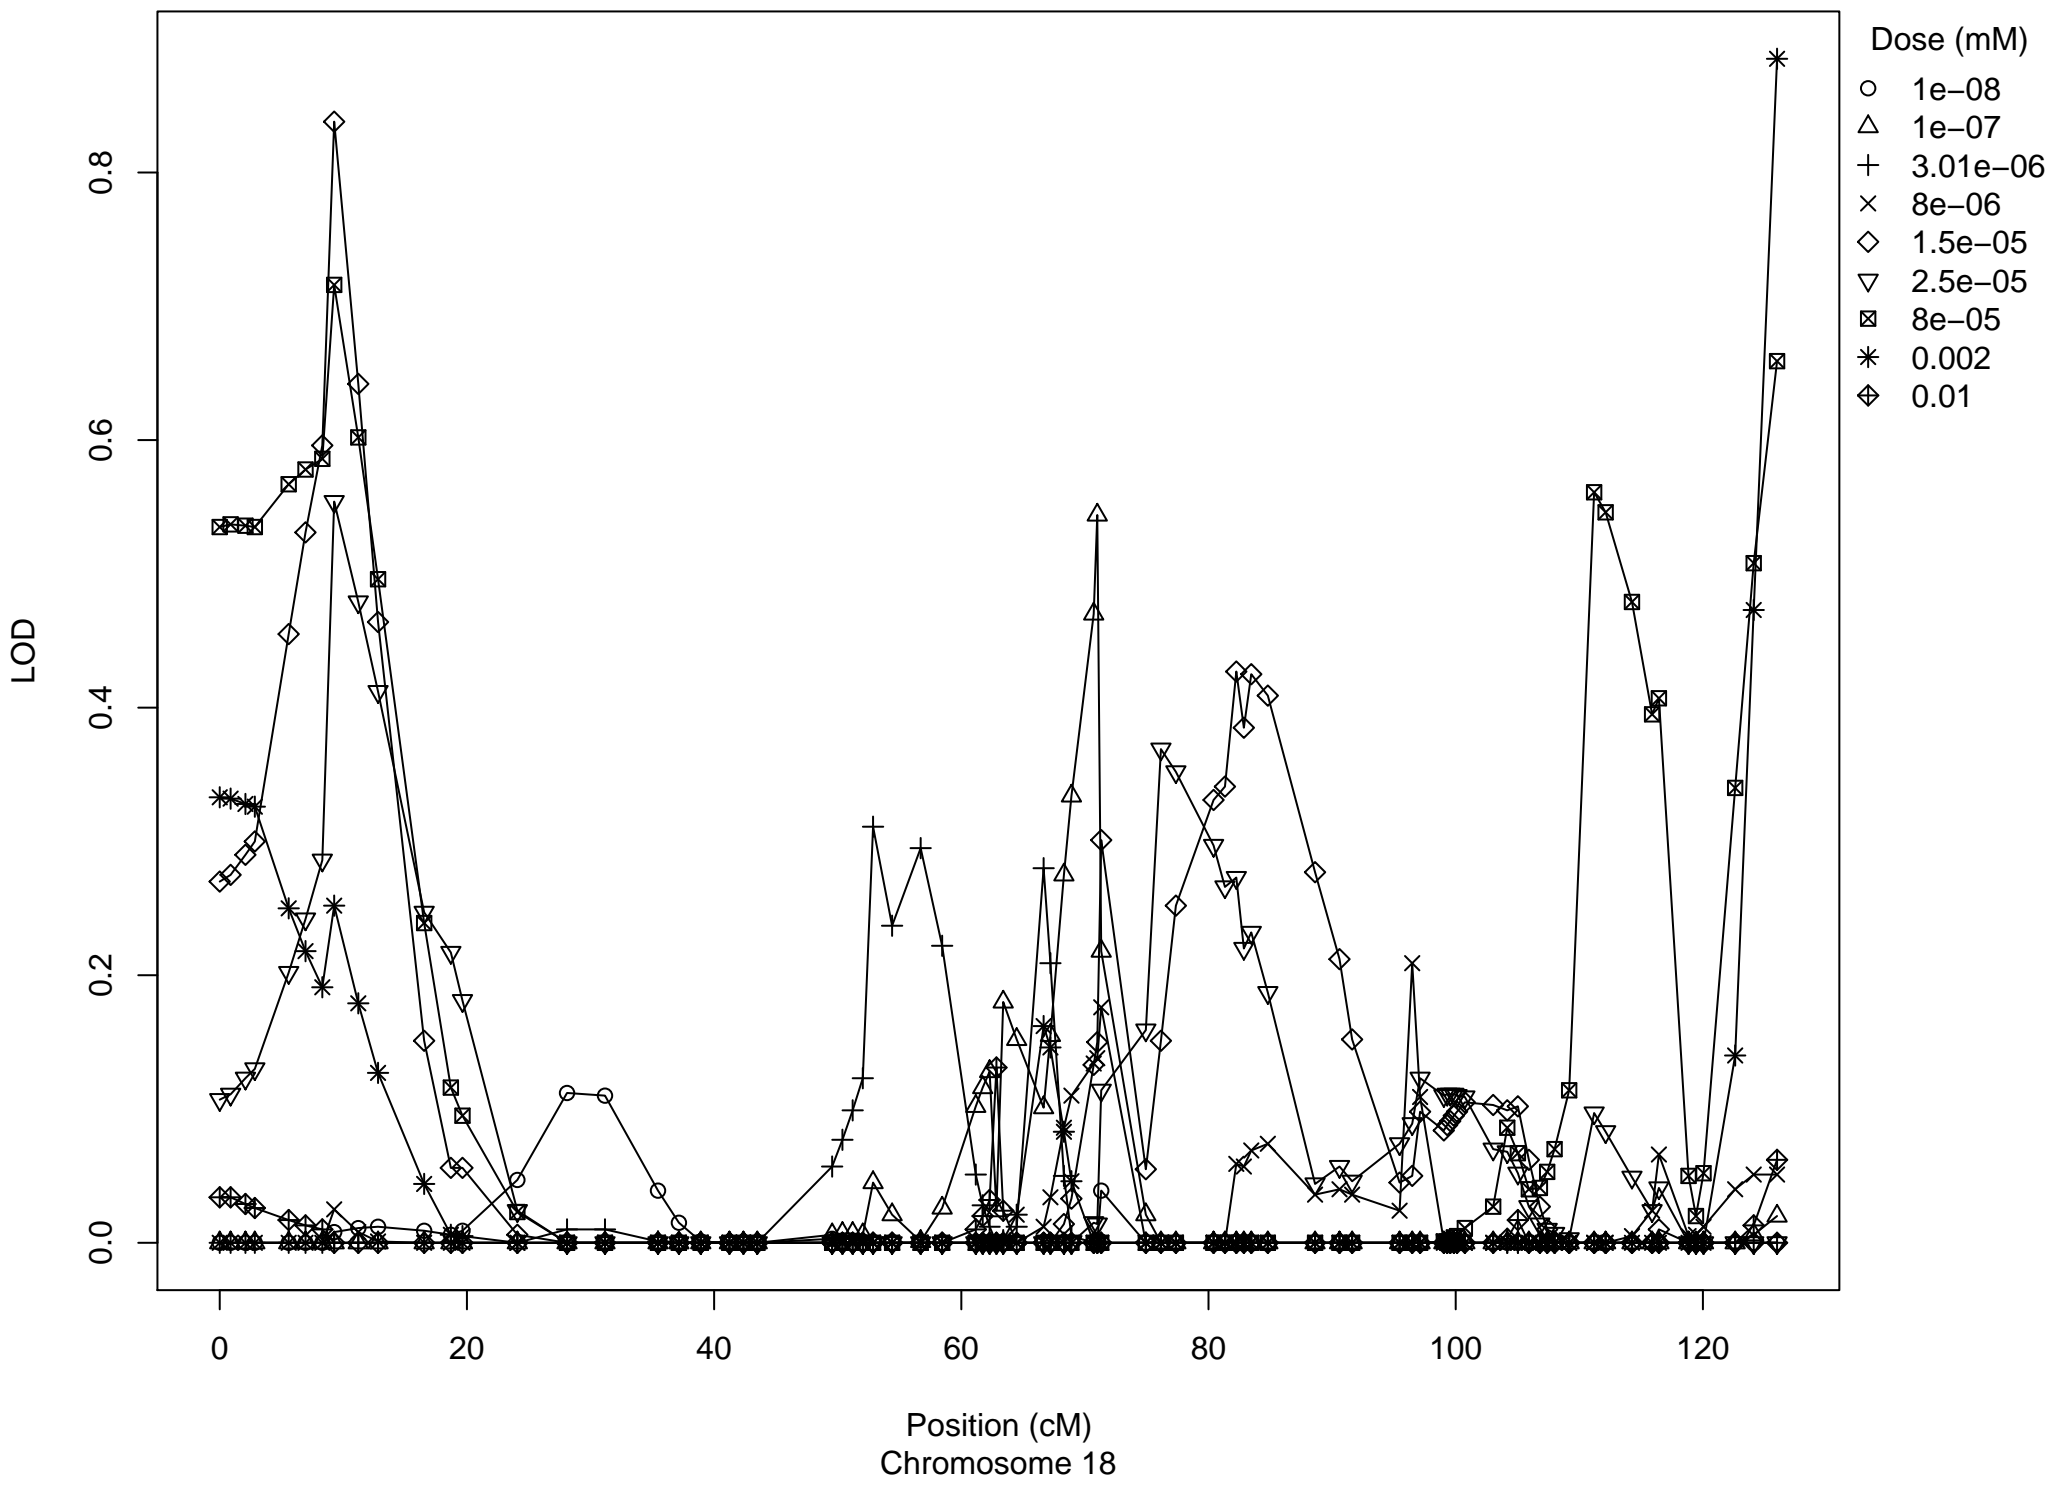



# Topotecan (TPT)

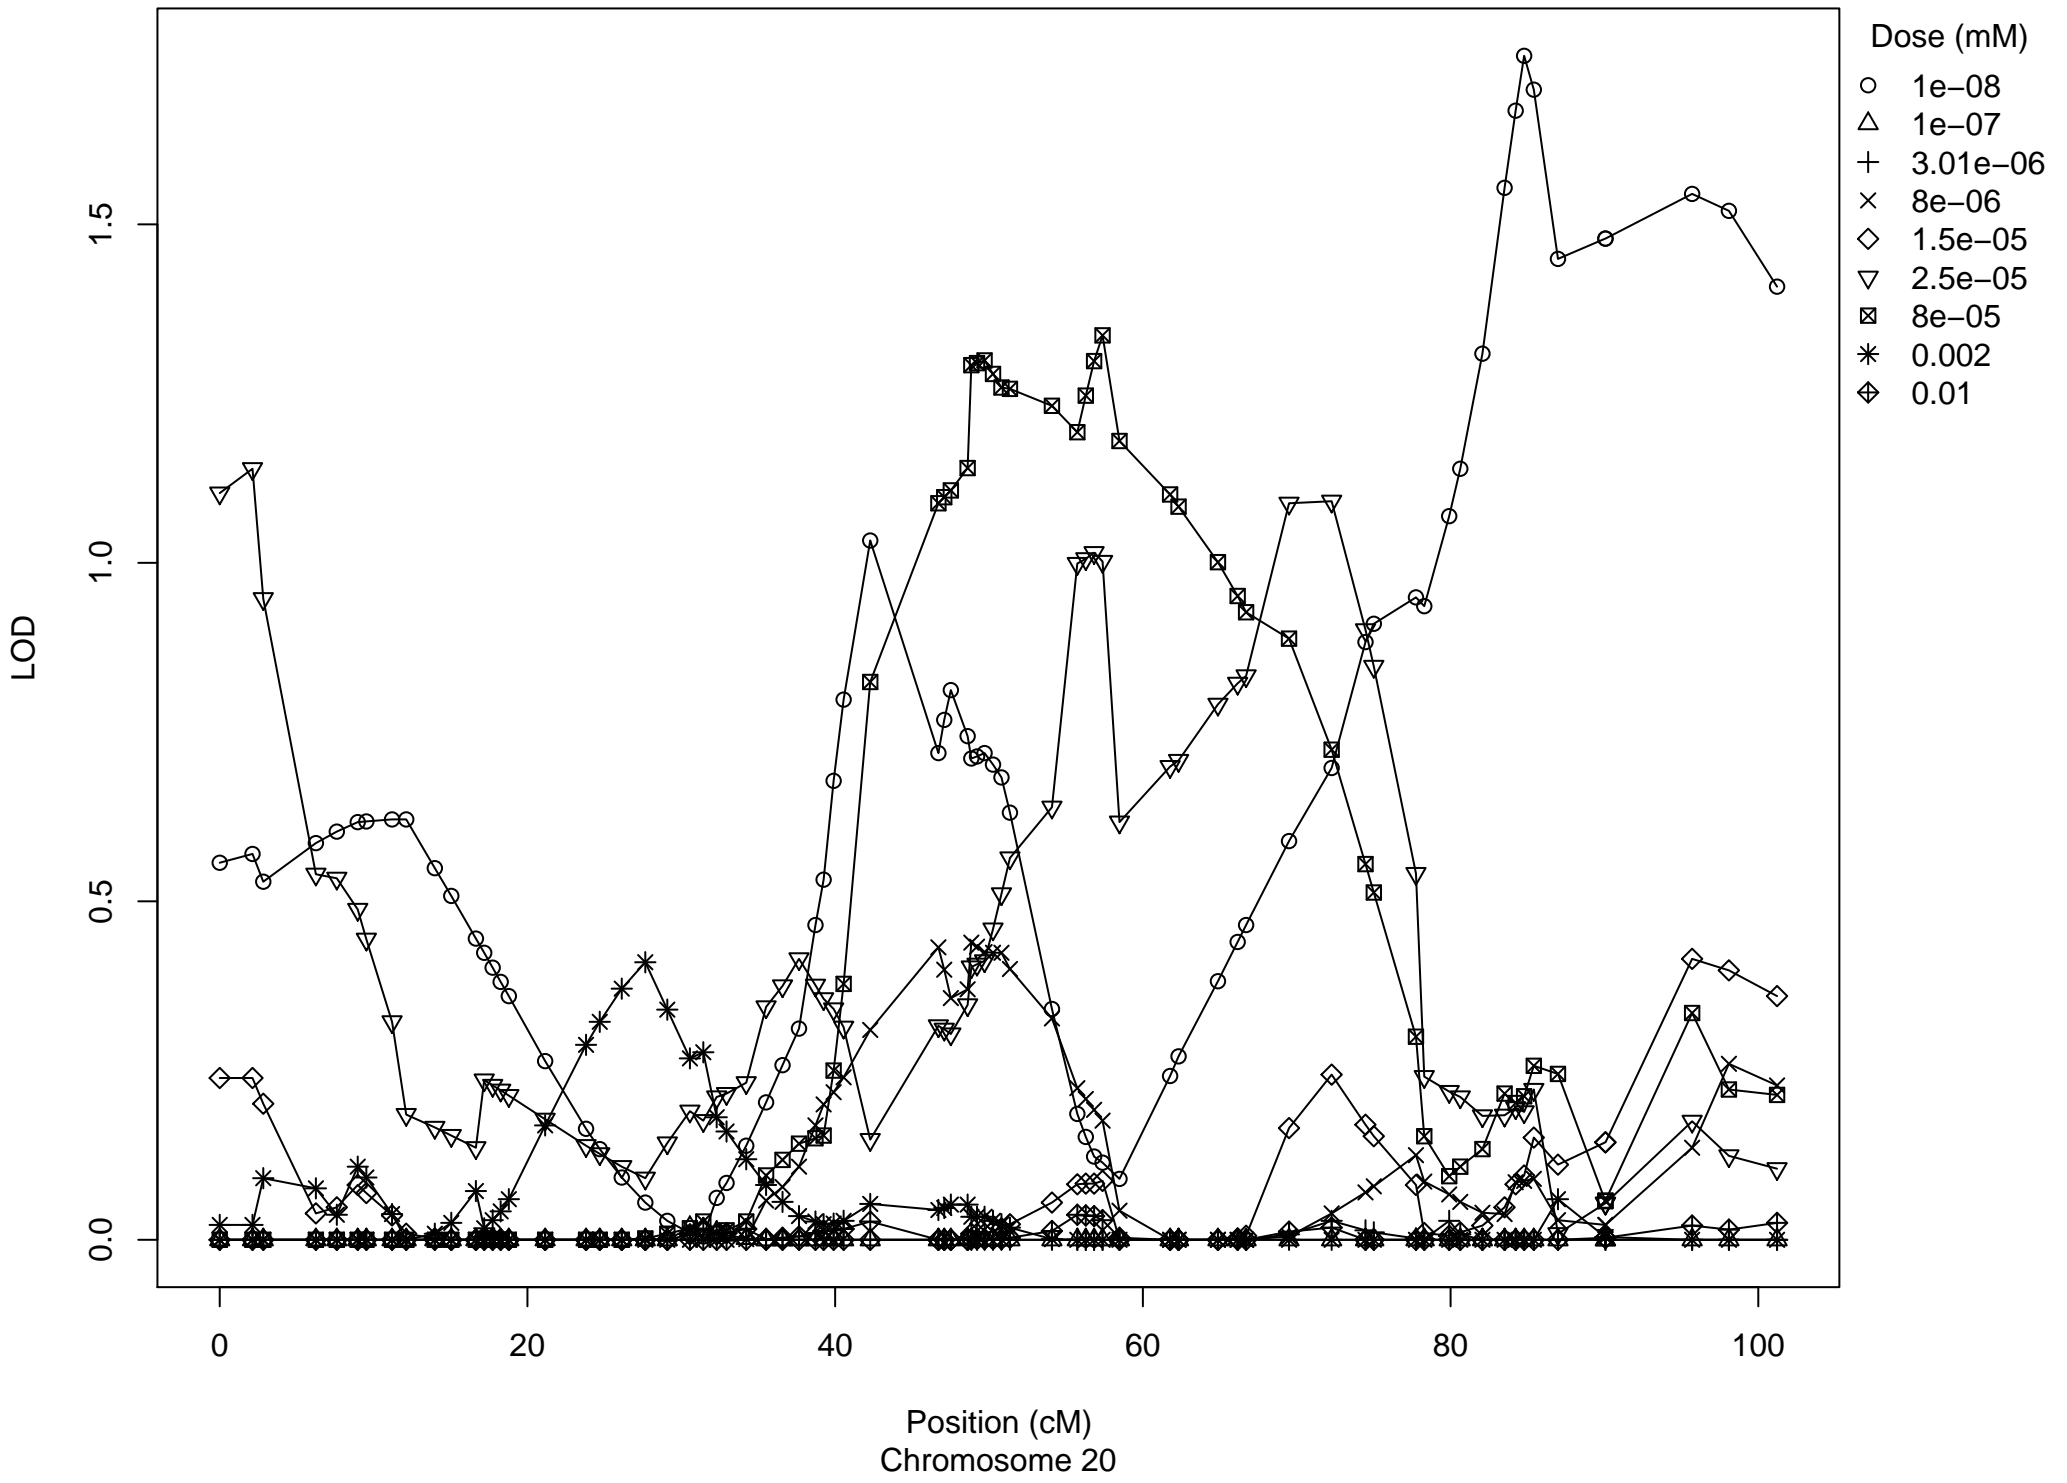

# Topotecan (TPT)

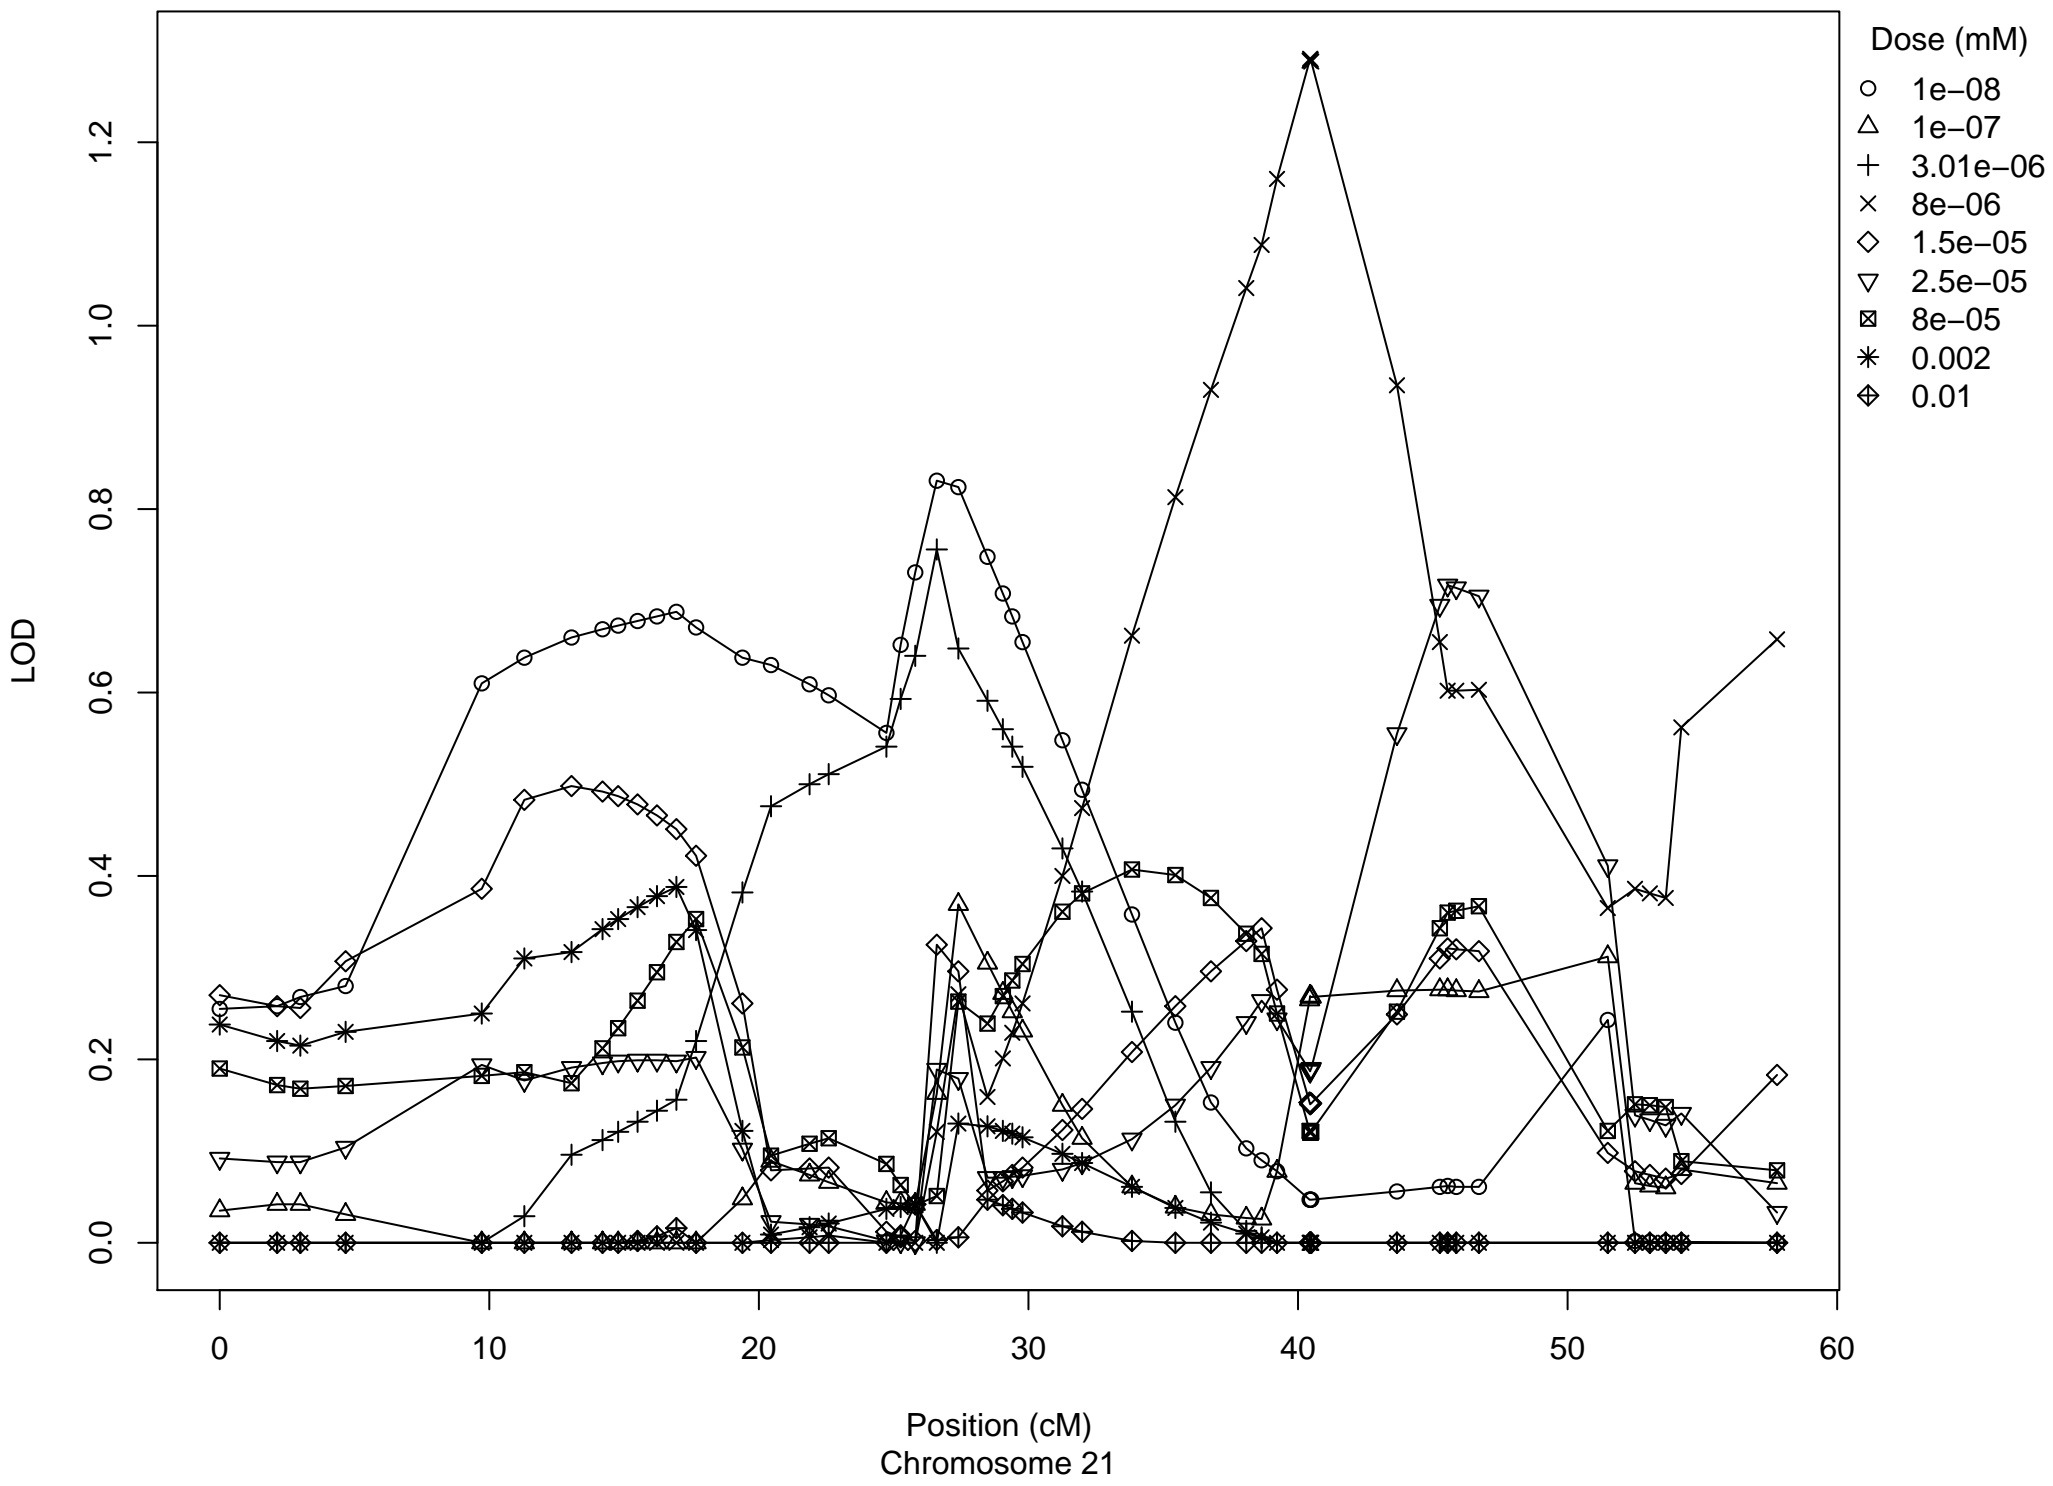

# Topotecan (TPT)

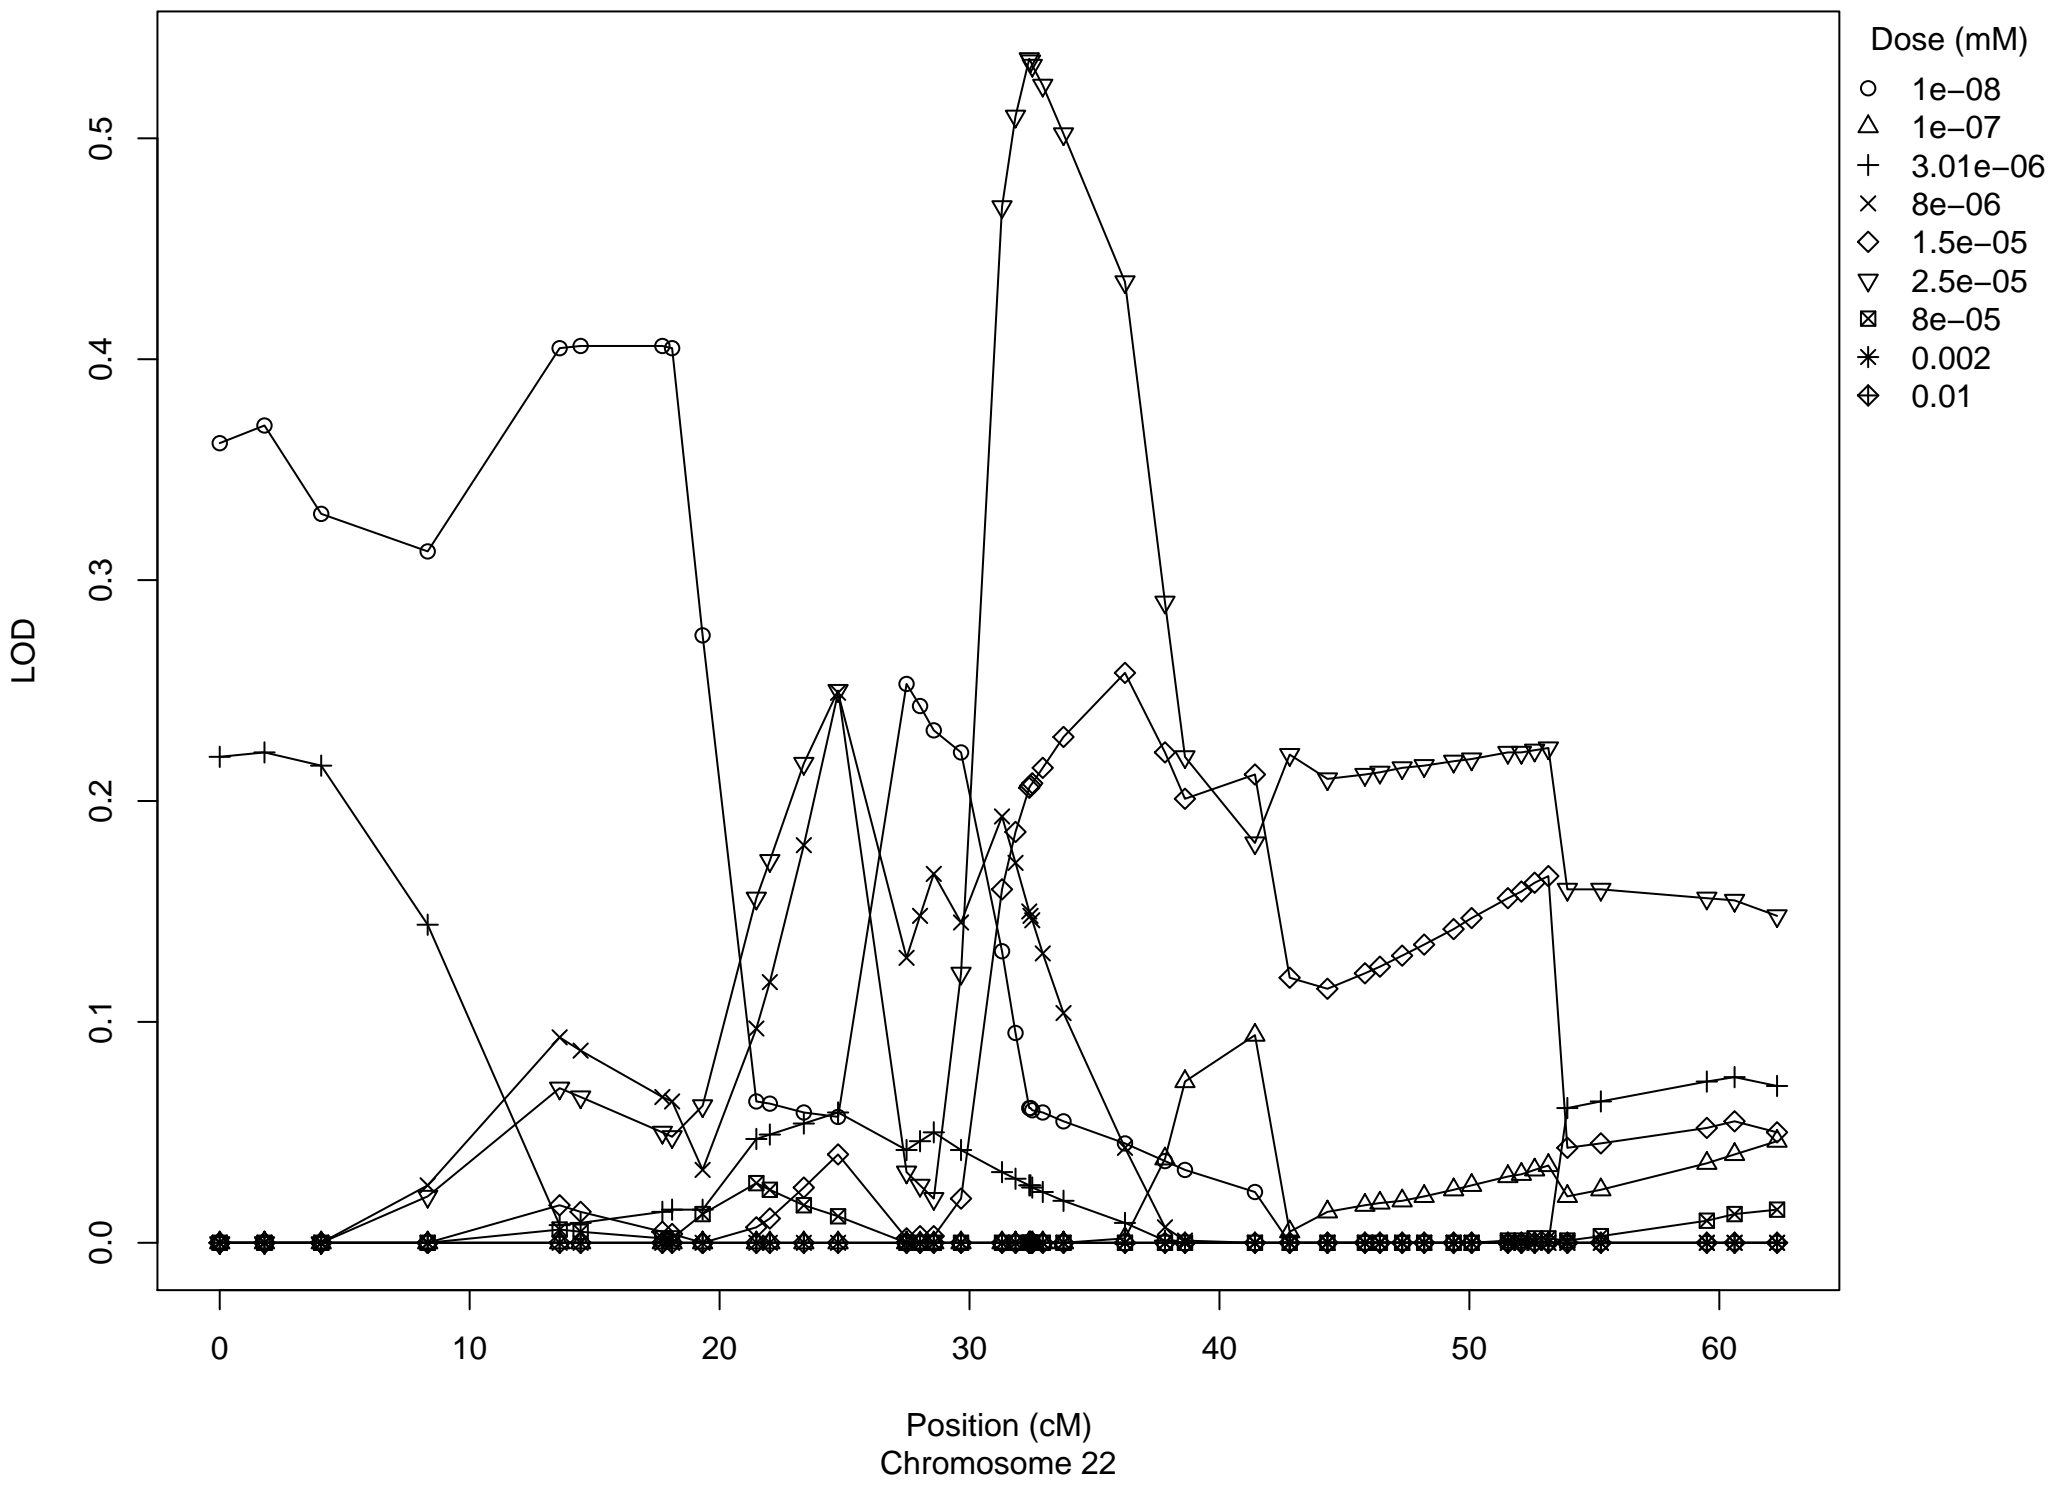



# 14-chloro-camptothecin (CICPT)

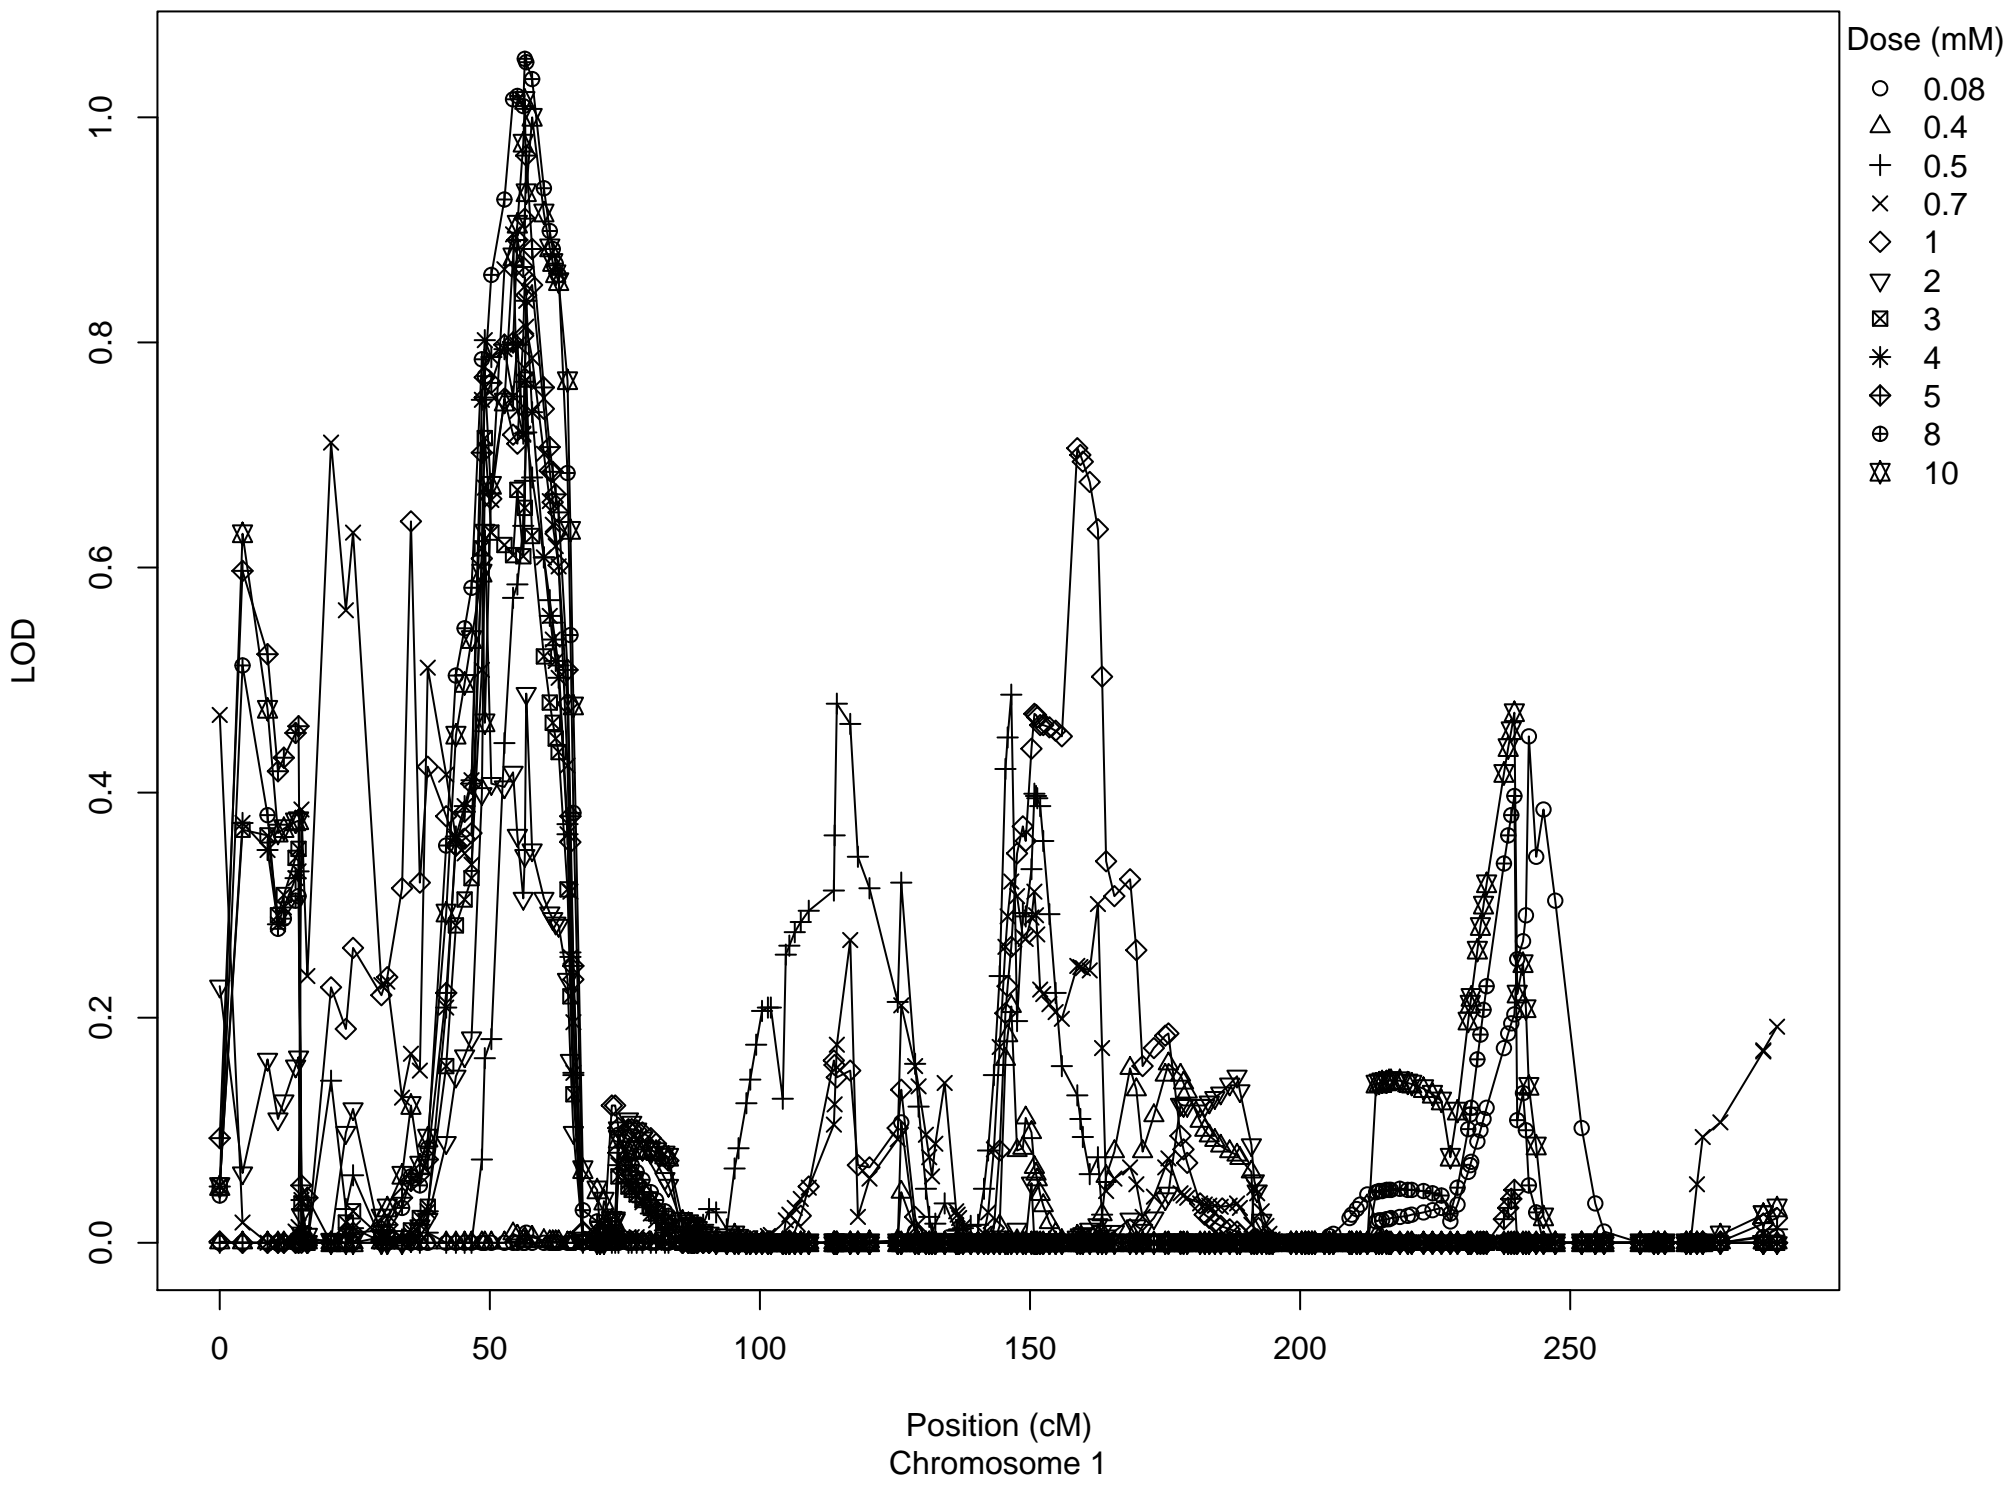

# 14-chloro-camptothecin (CICPT)

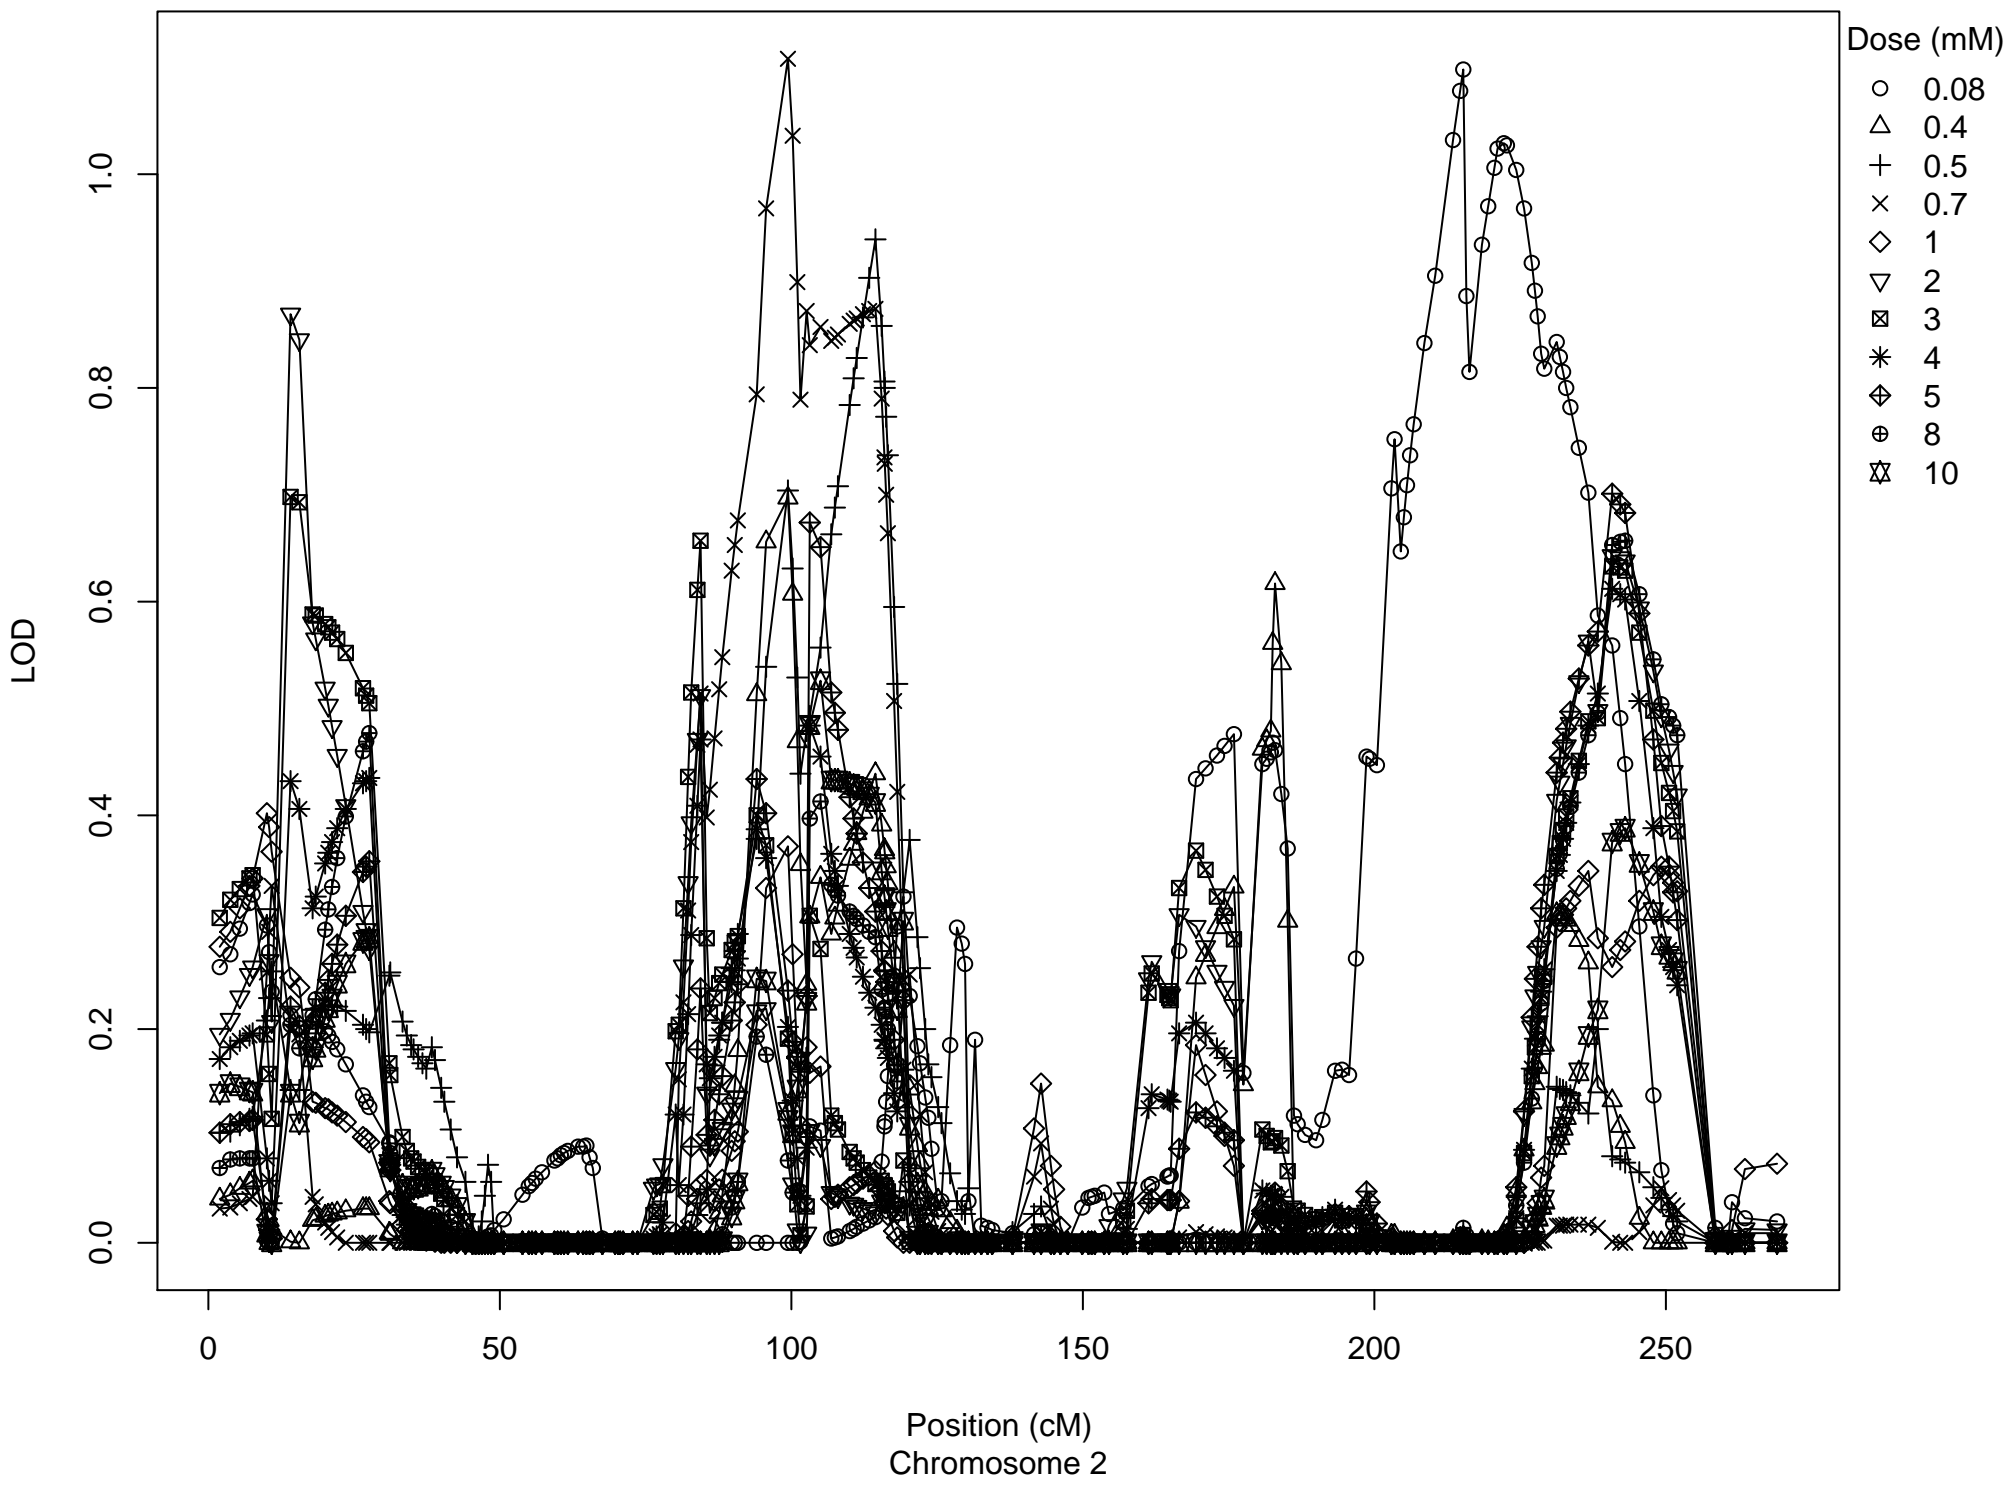

# 14-chloro-camptothecin (CICPT)

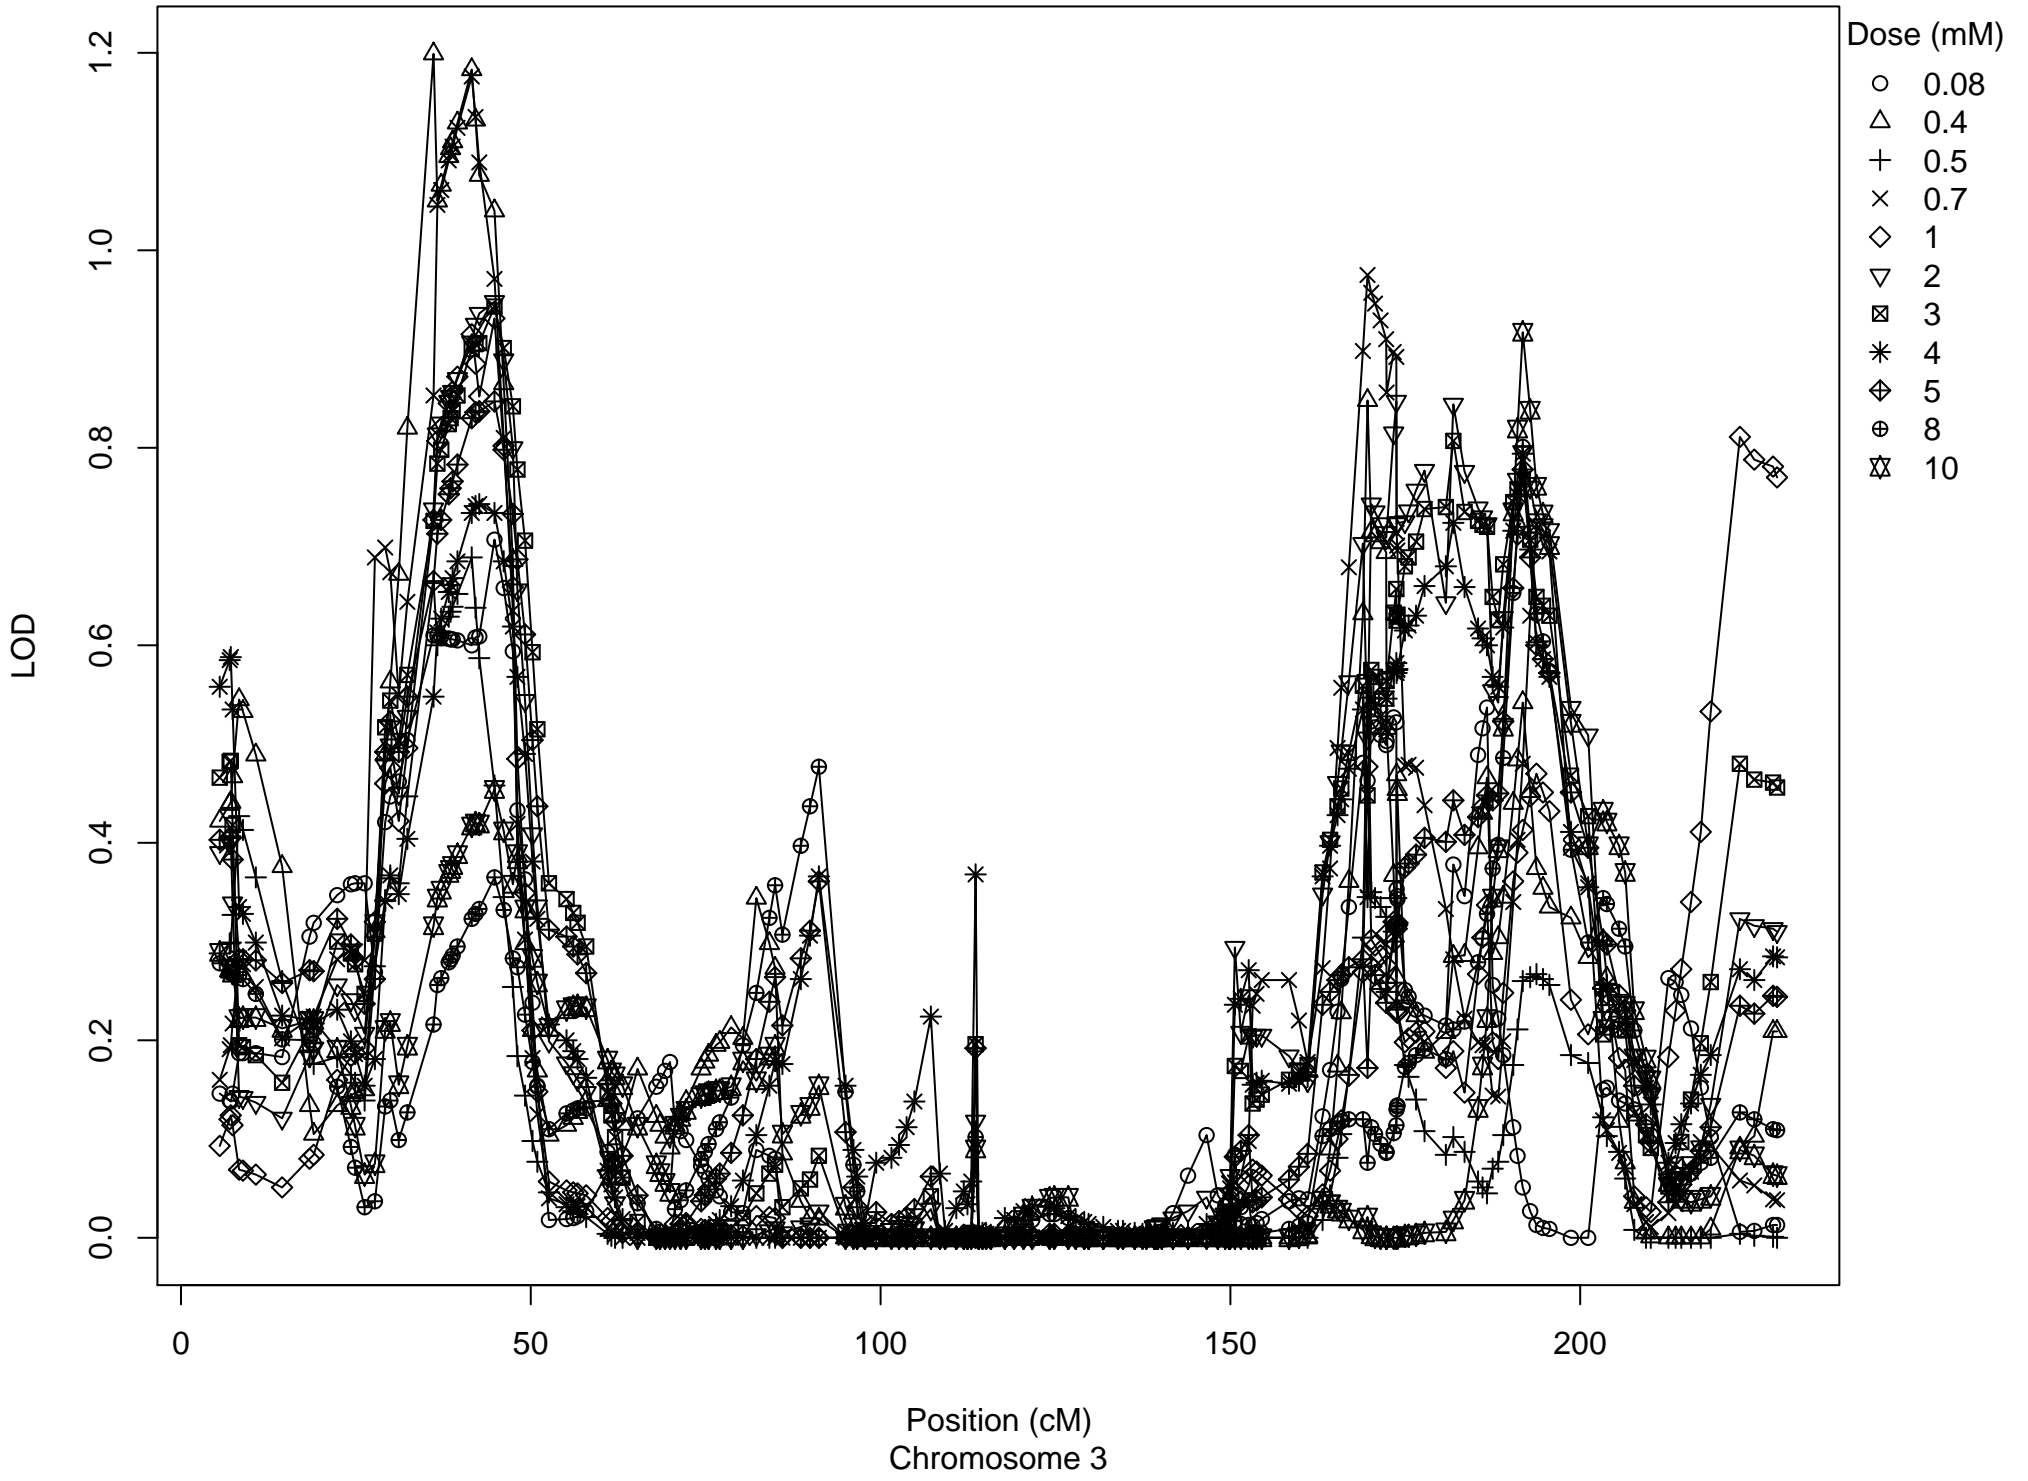

# 14-chloro-camptothecin (CICPT)

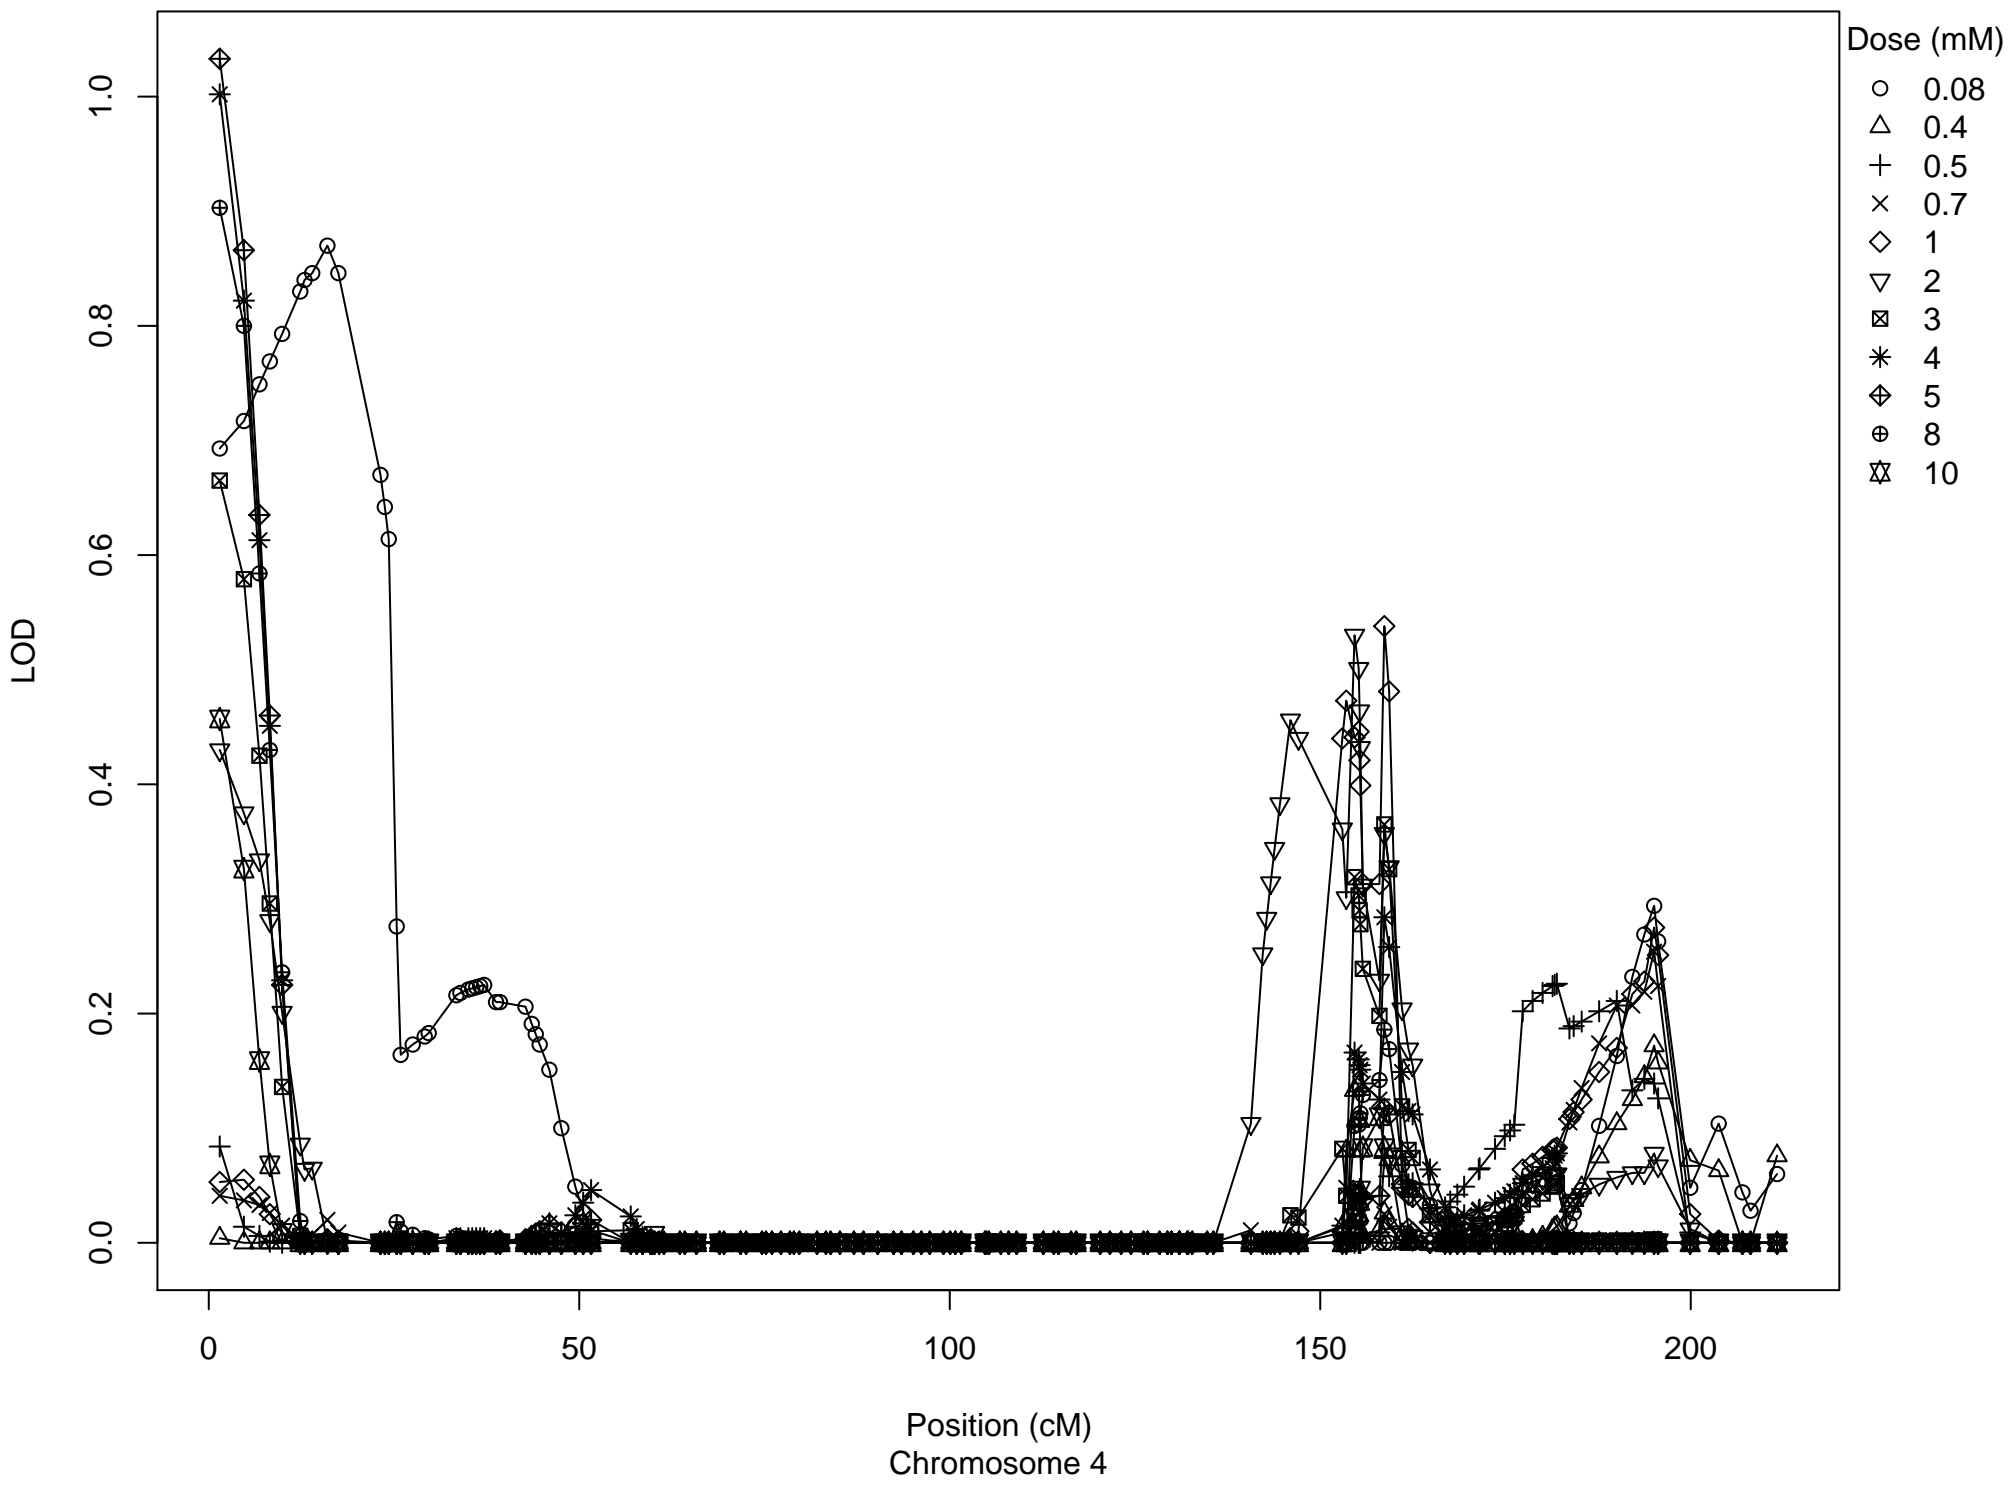

# 14-chloro-camptothecin (CICPT)

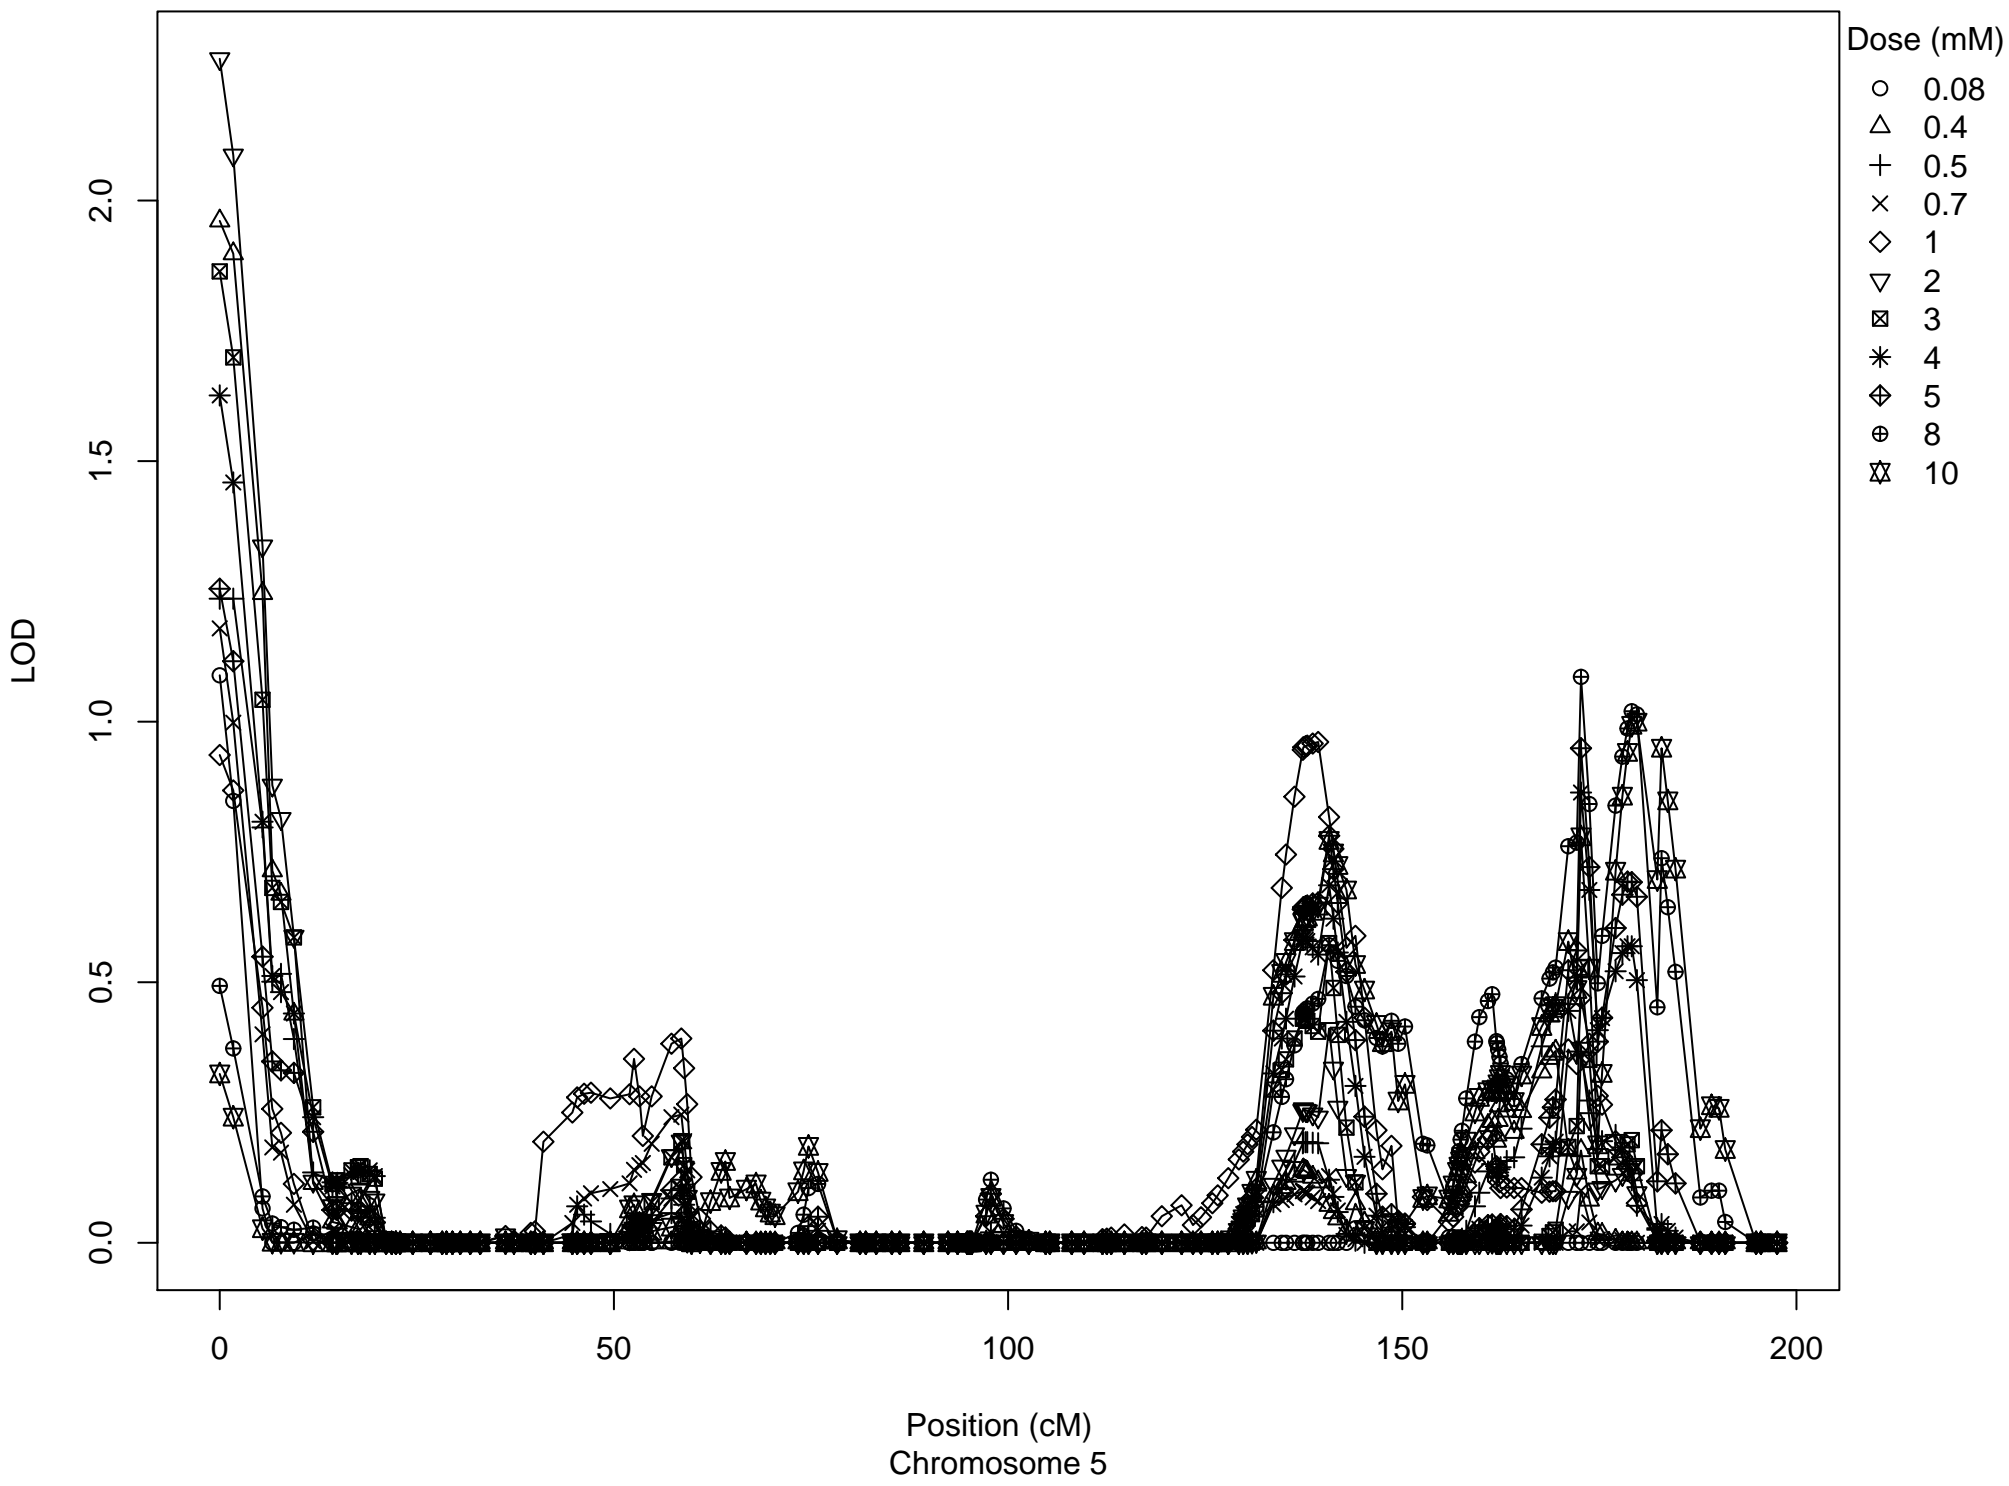

# 14-chloro-camptothecin (CICPT)

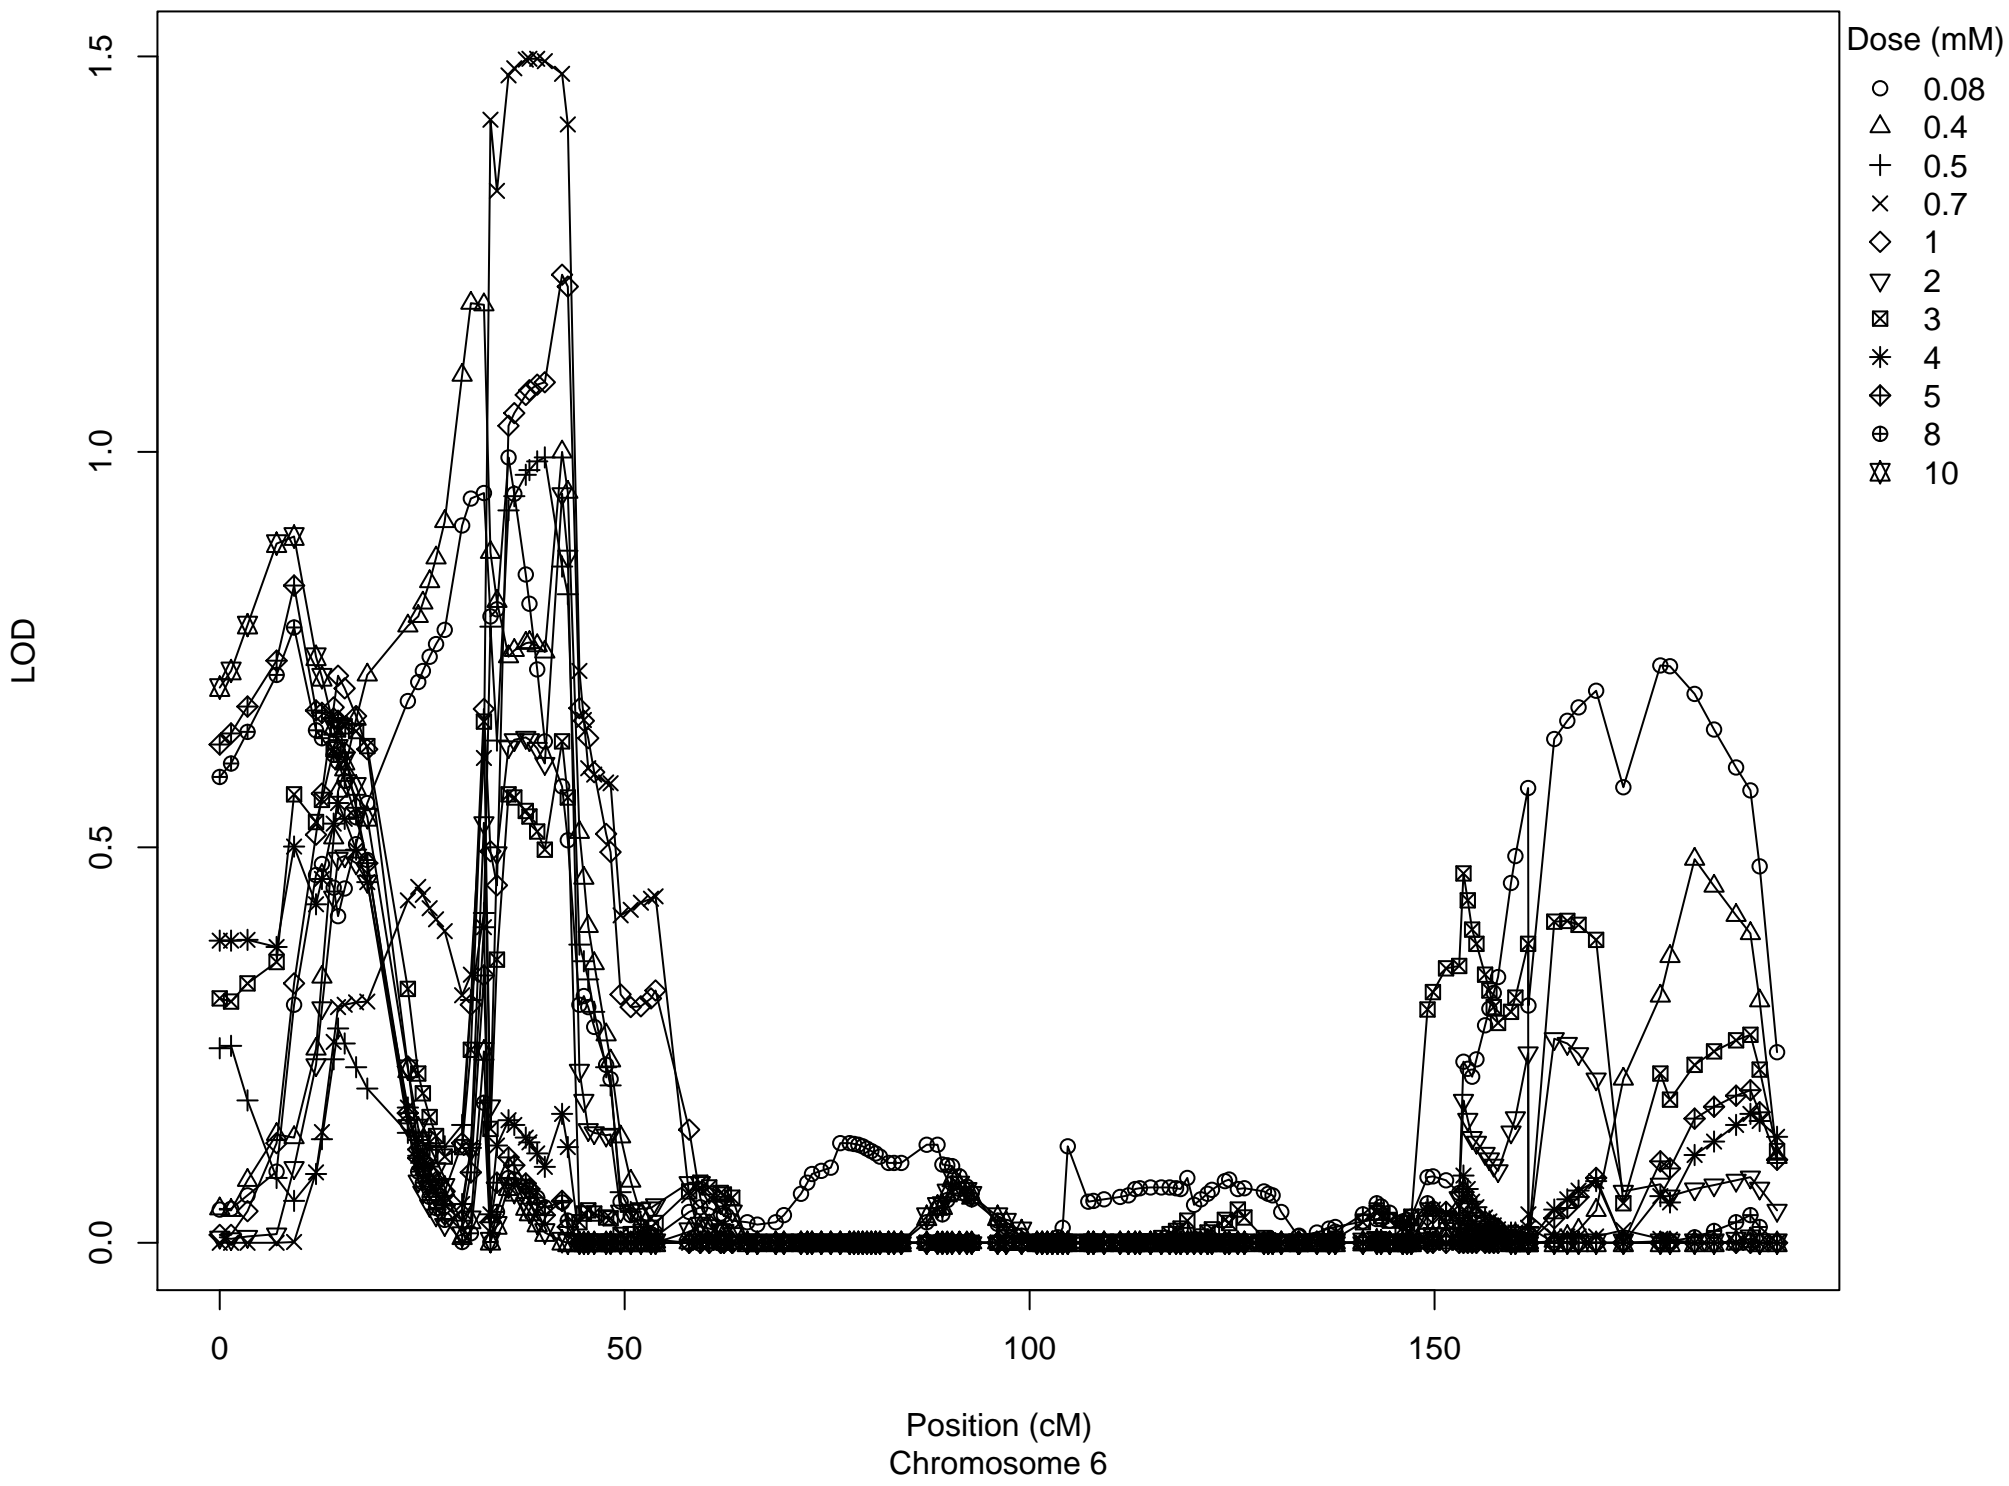

# 14-chloro-camptothecin (CICPT)

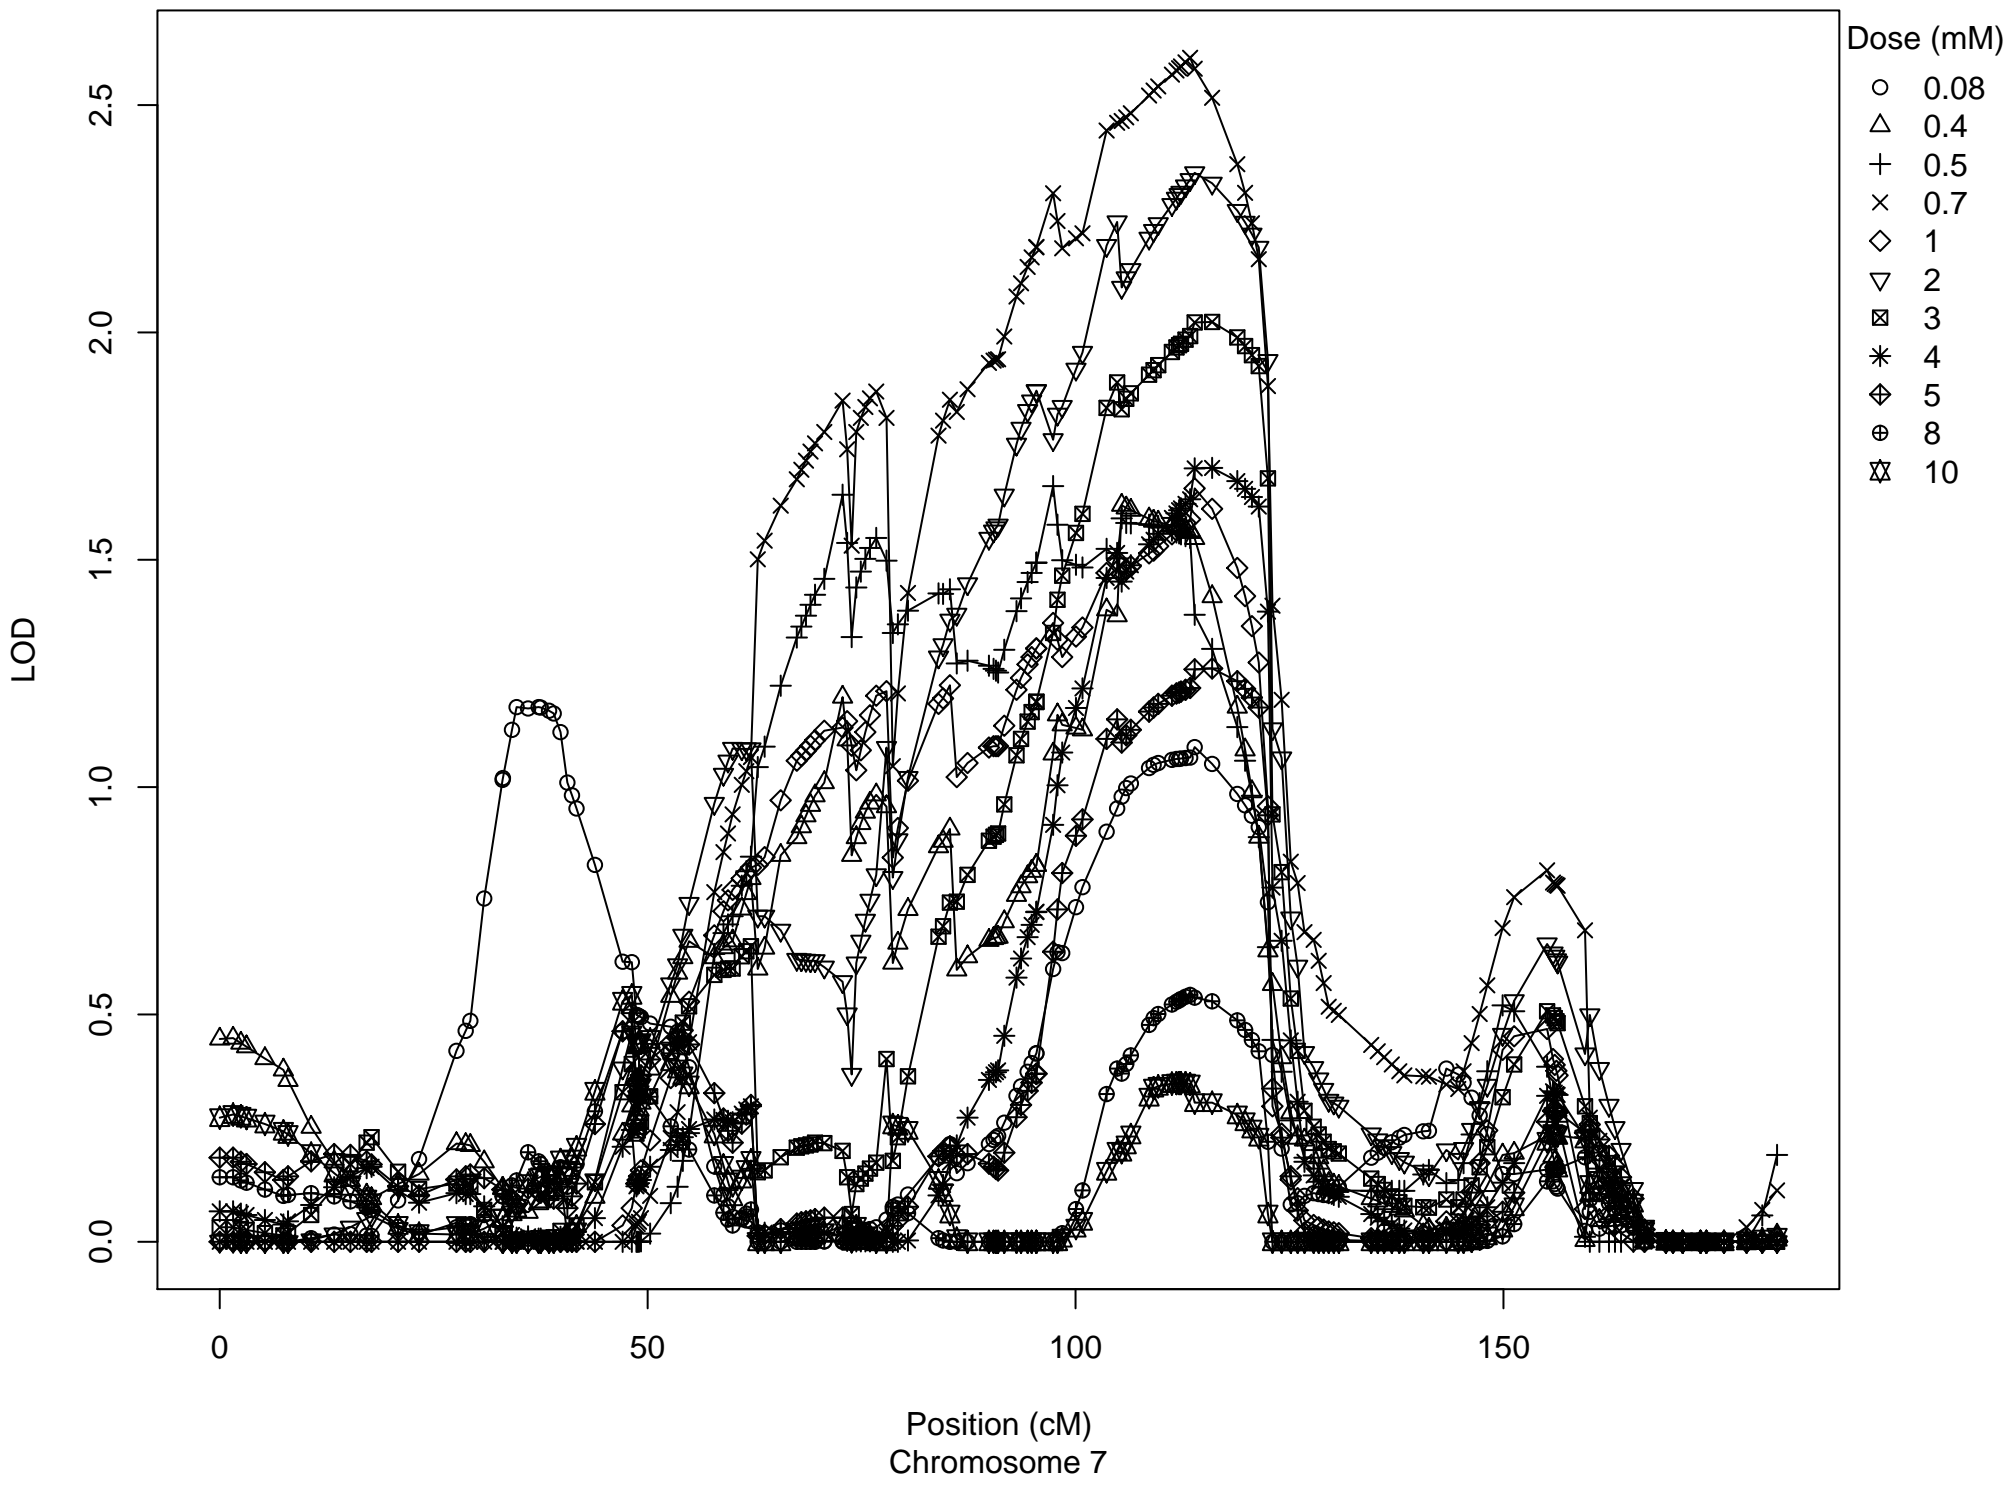

# 14-chloro-camptothecin (CICPT)

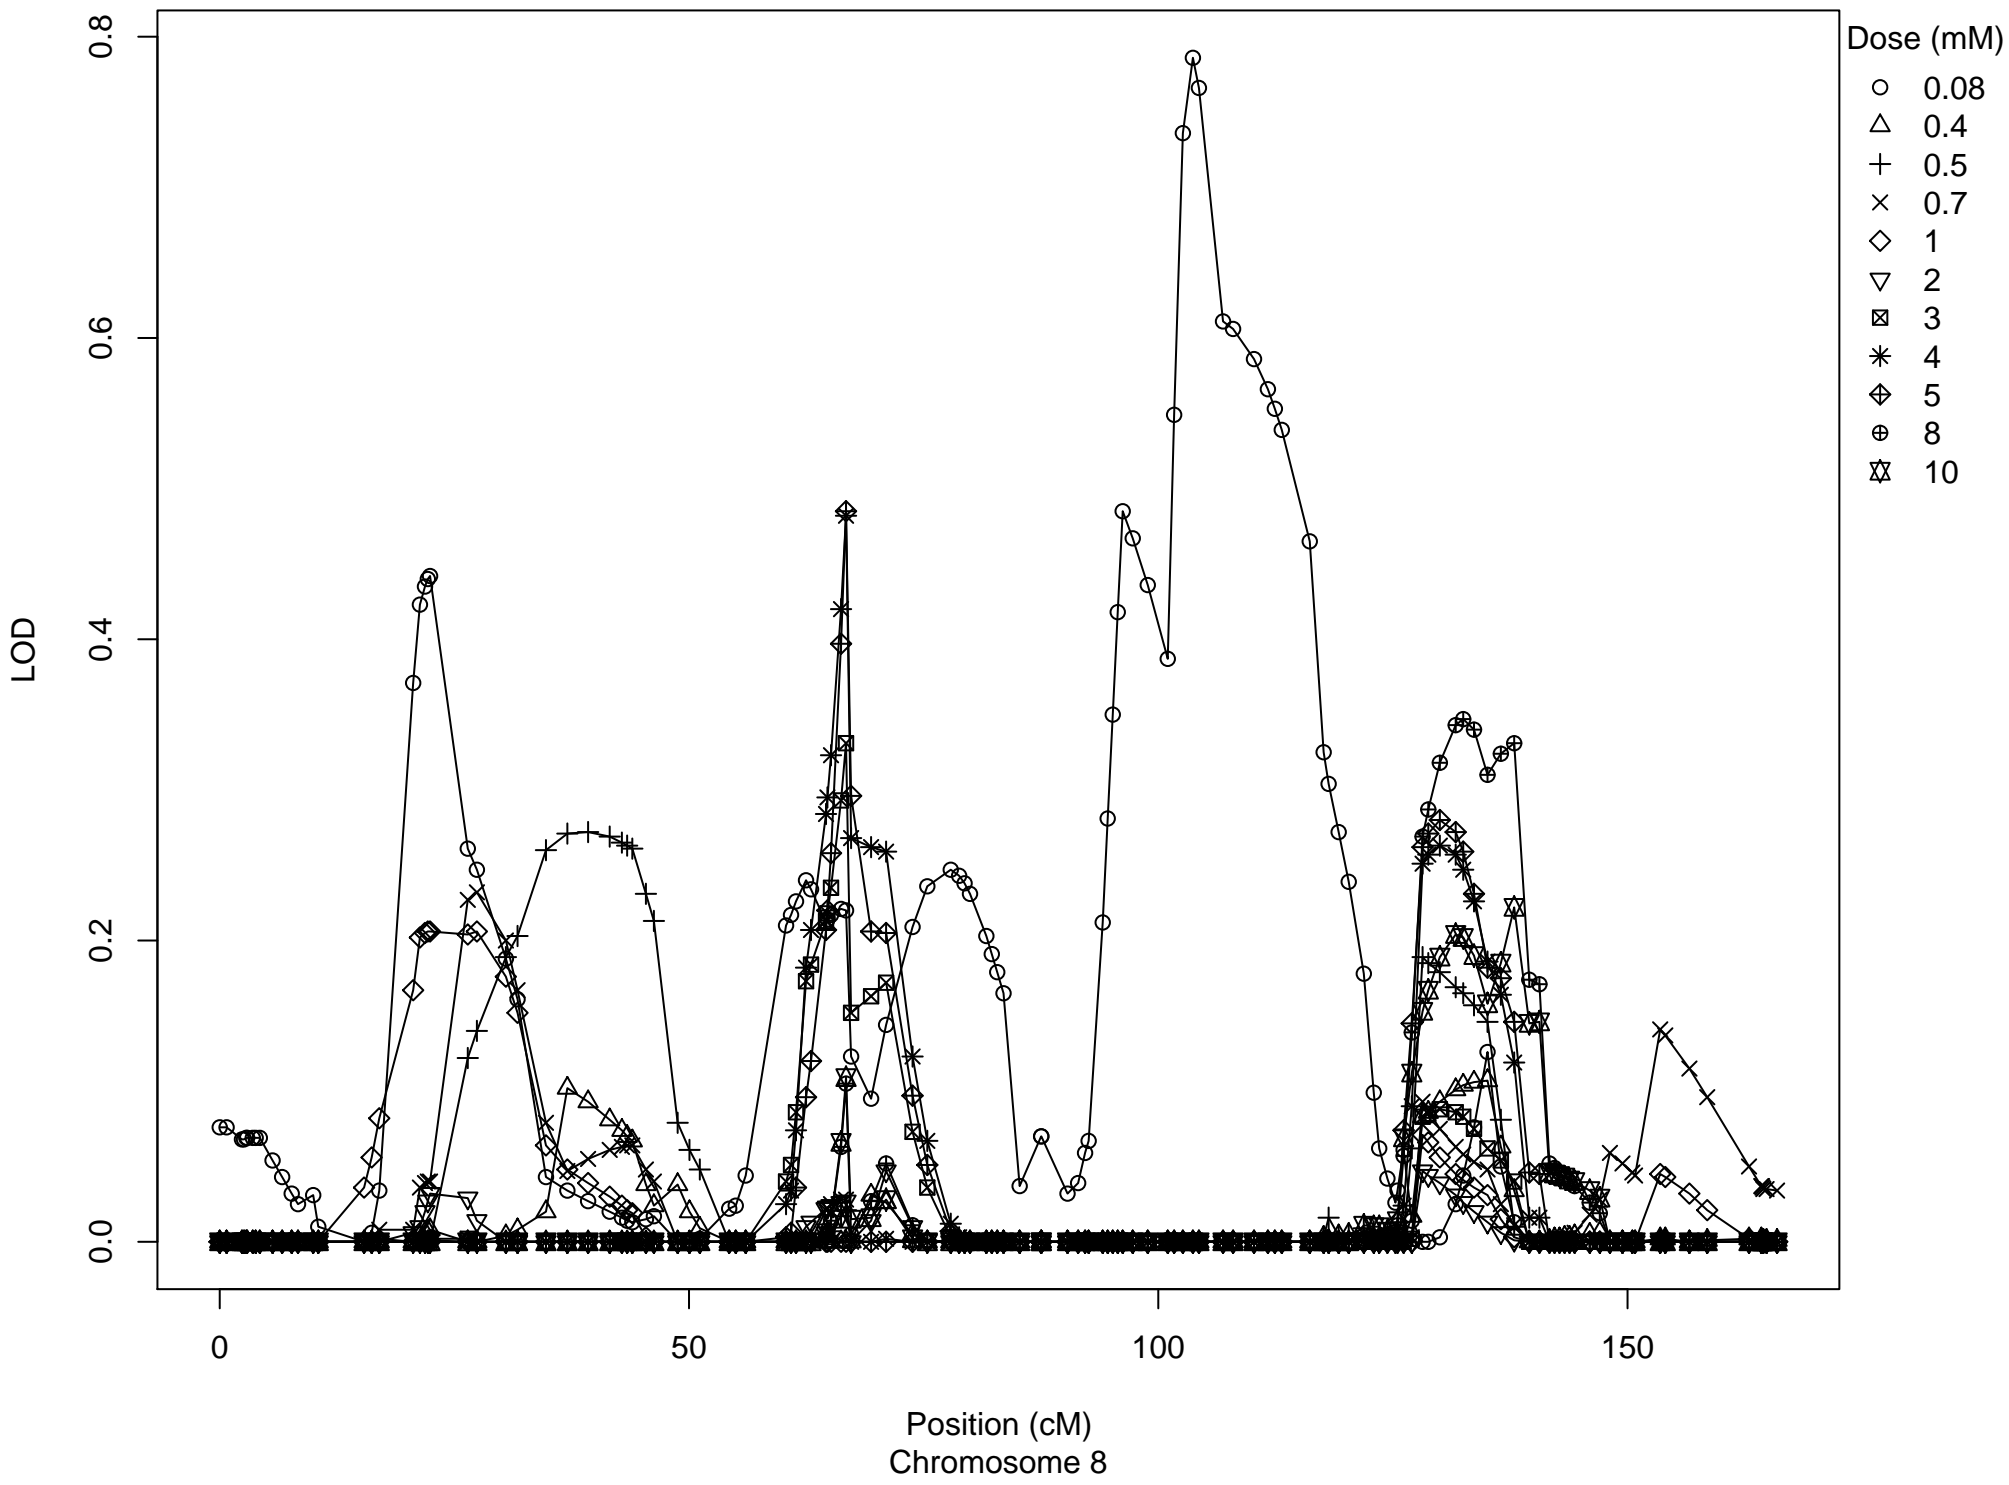



# 14-chloro-camptothecin (CICPT)

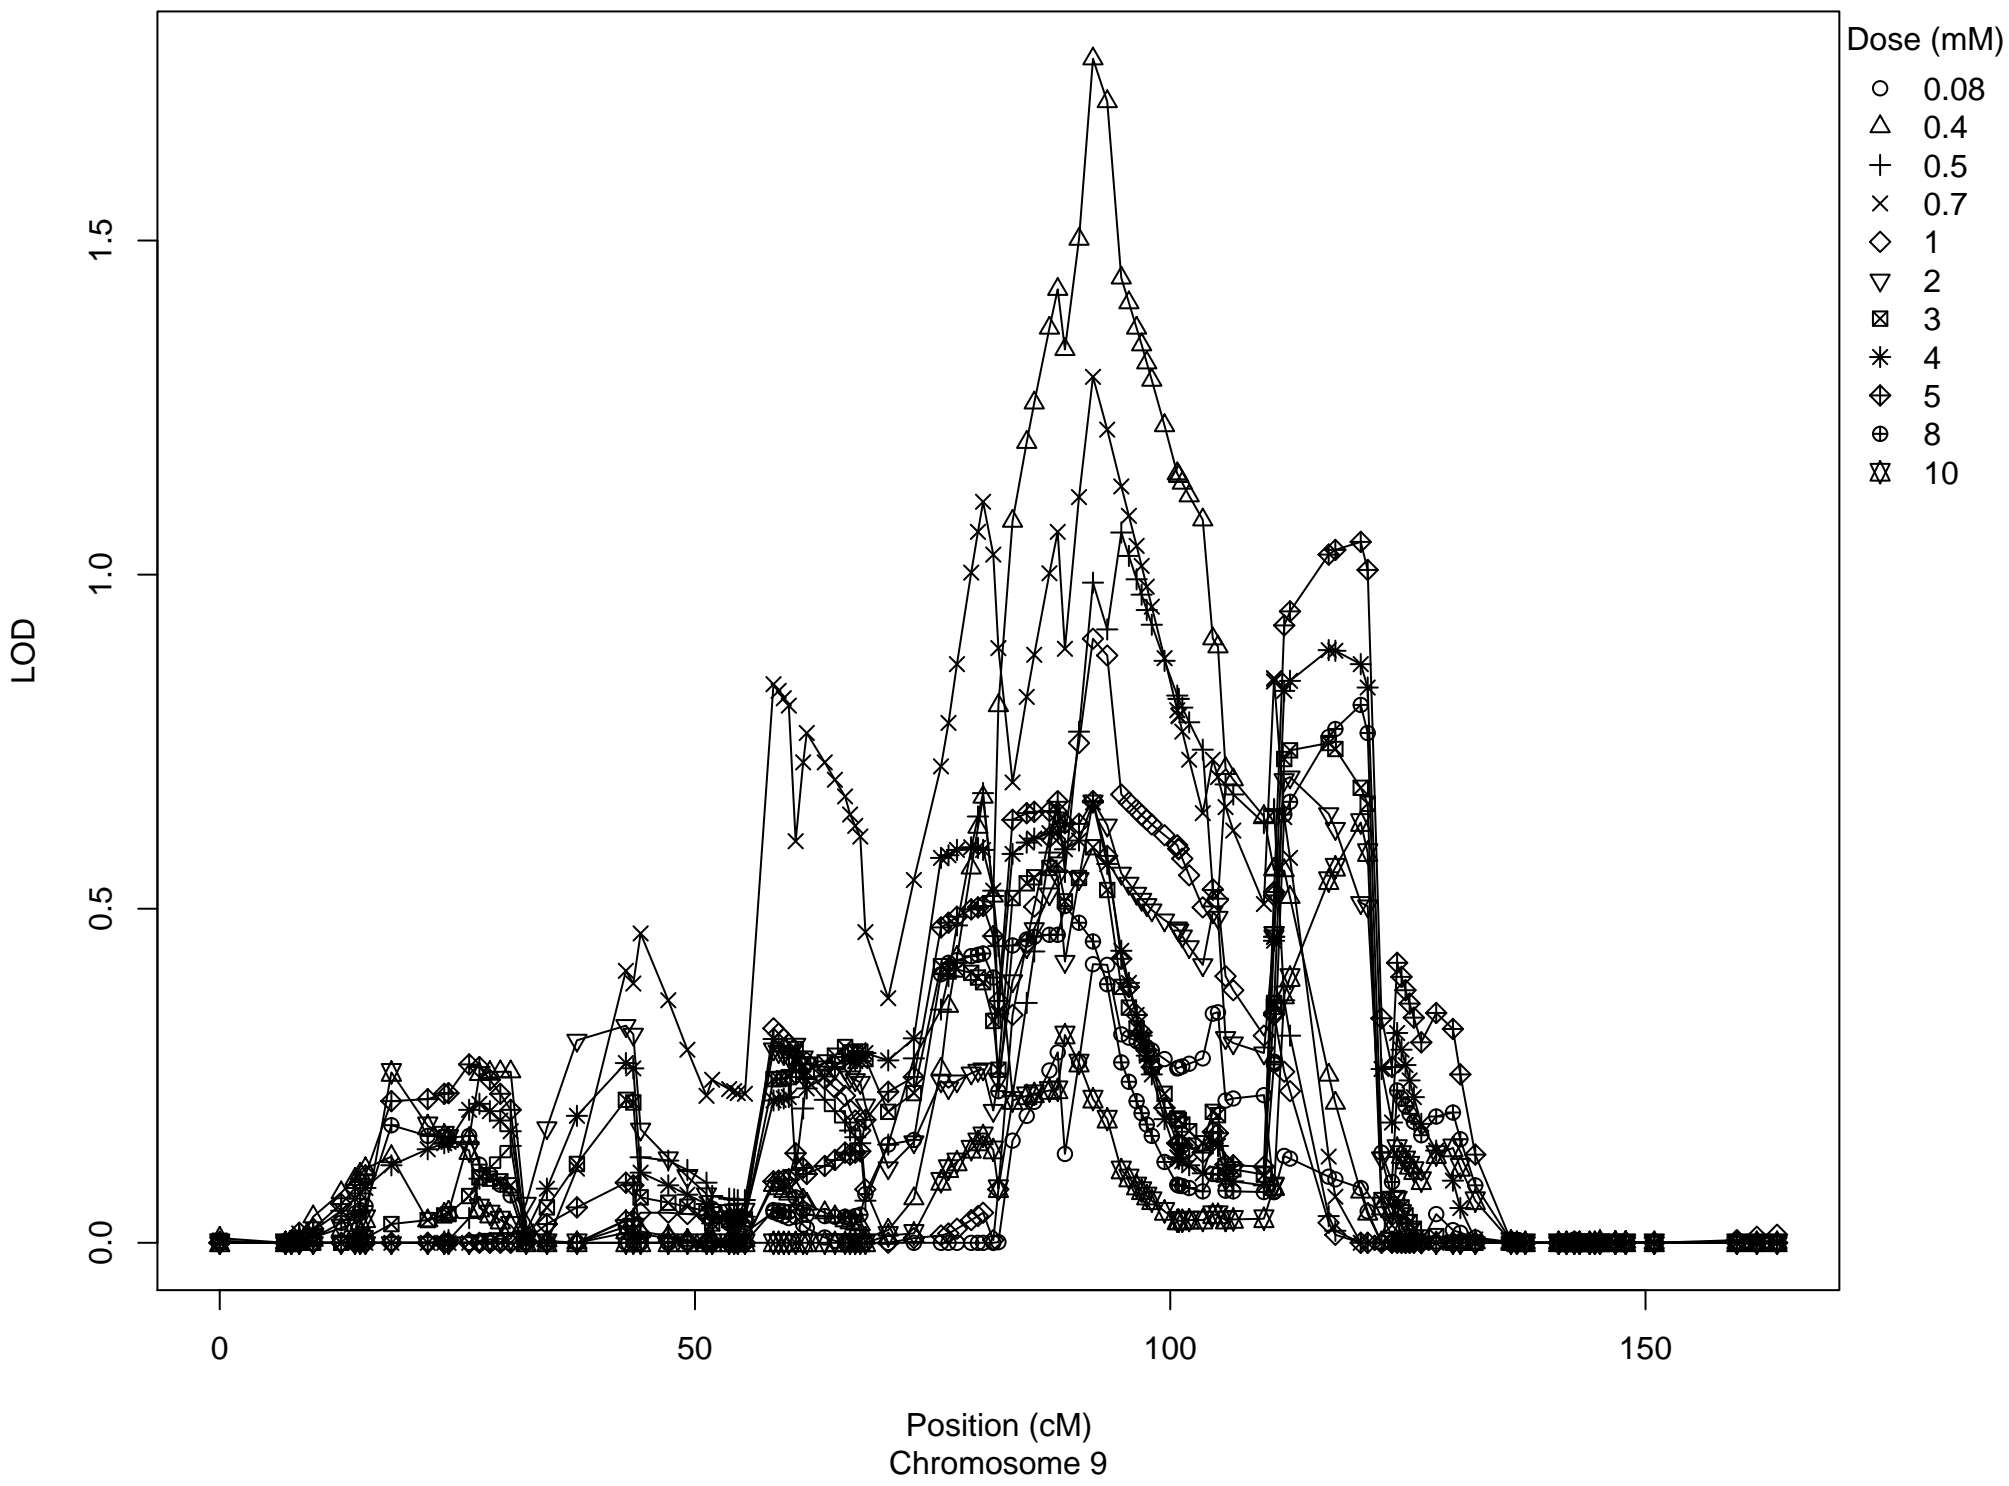

# 14-chloro-camptothecin (CICPT)

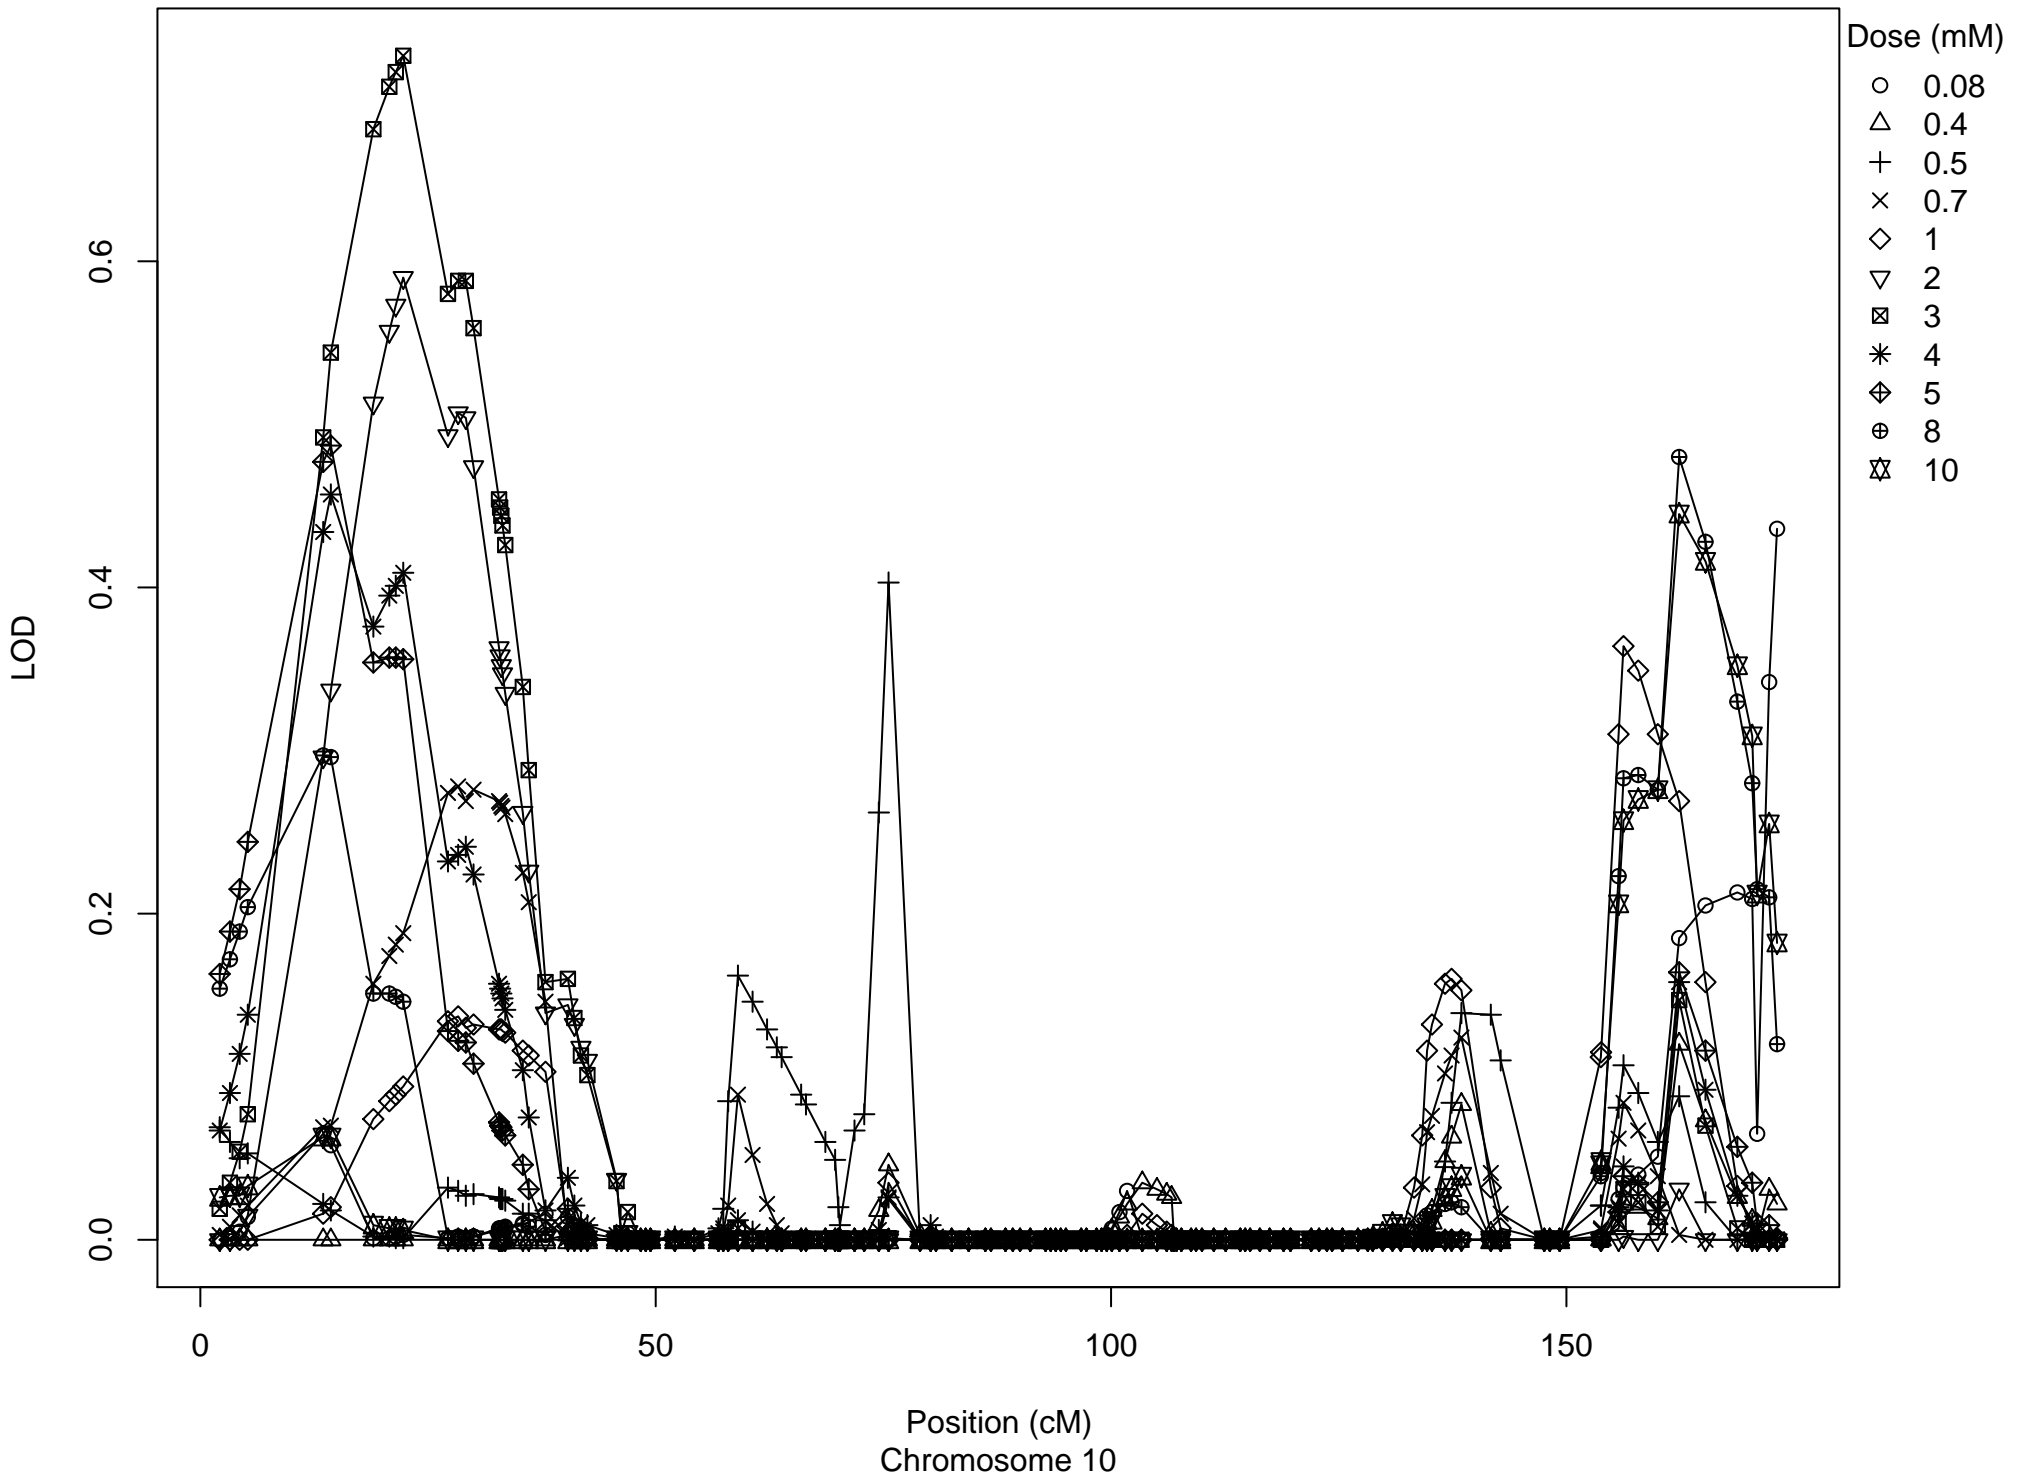

# 14-chloro-camptothecin (CICPT)

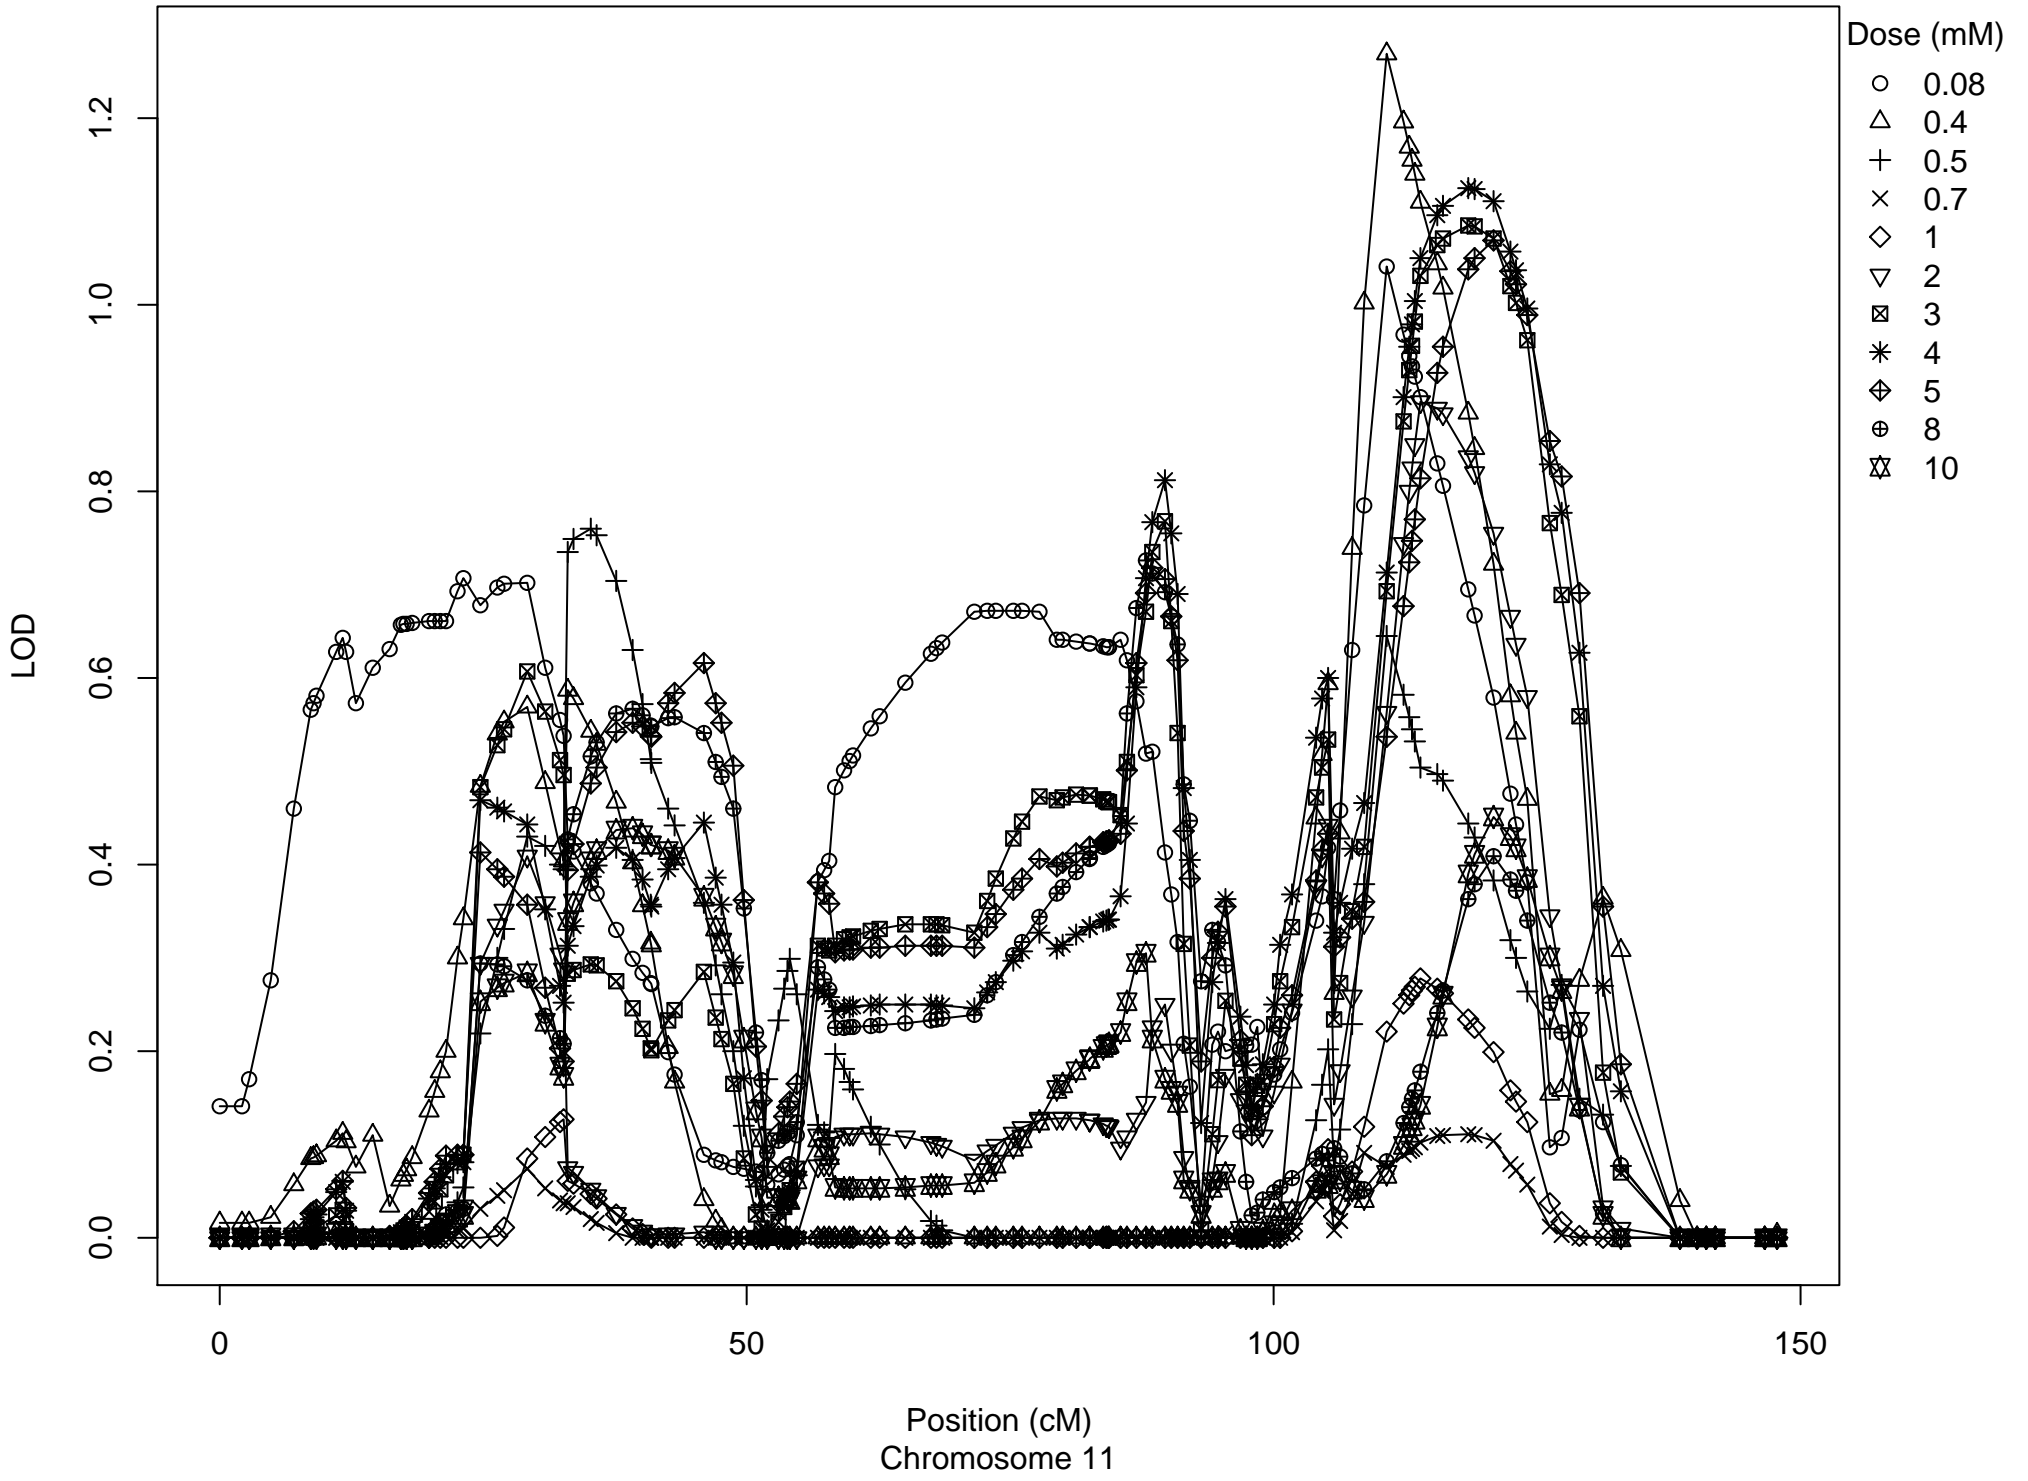





# 14-chloro-camptothecin (CICPT)

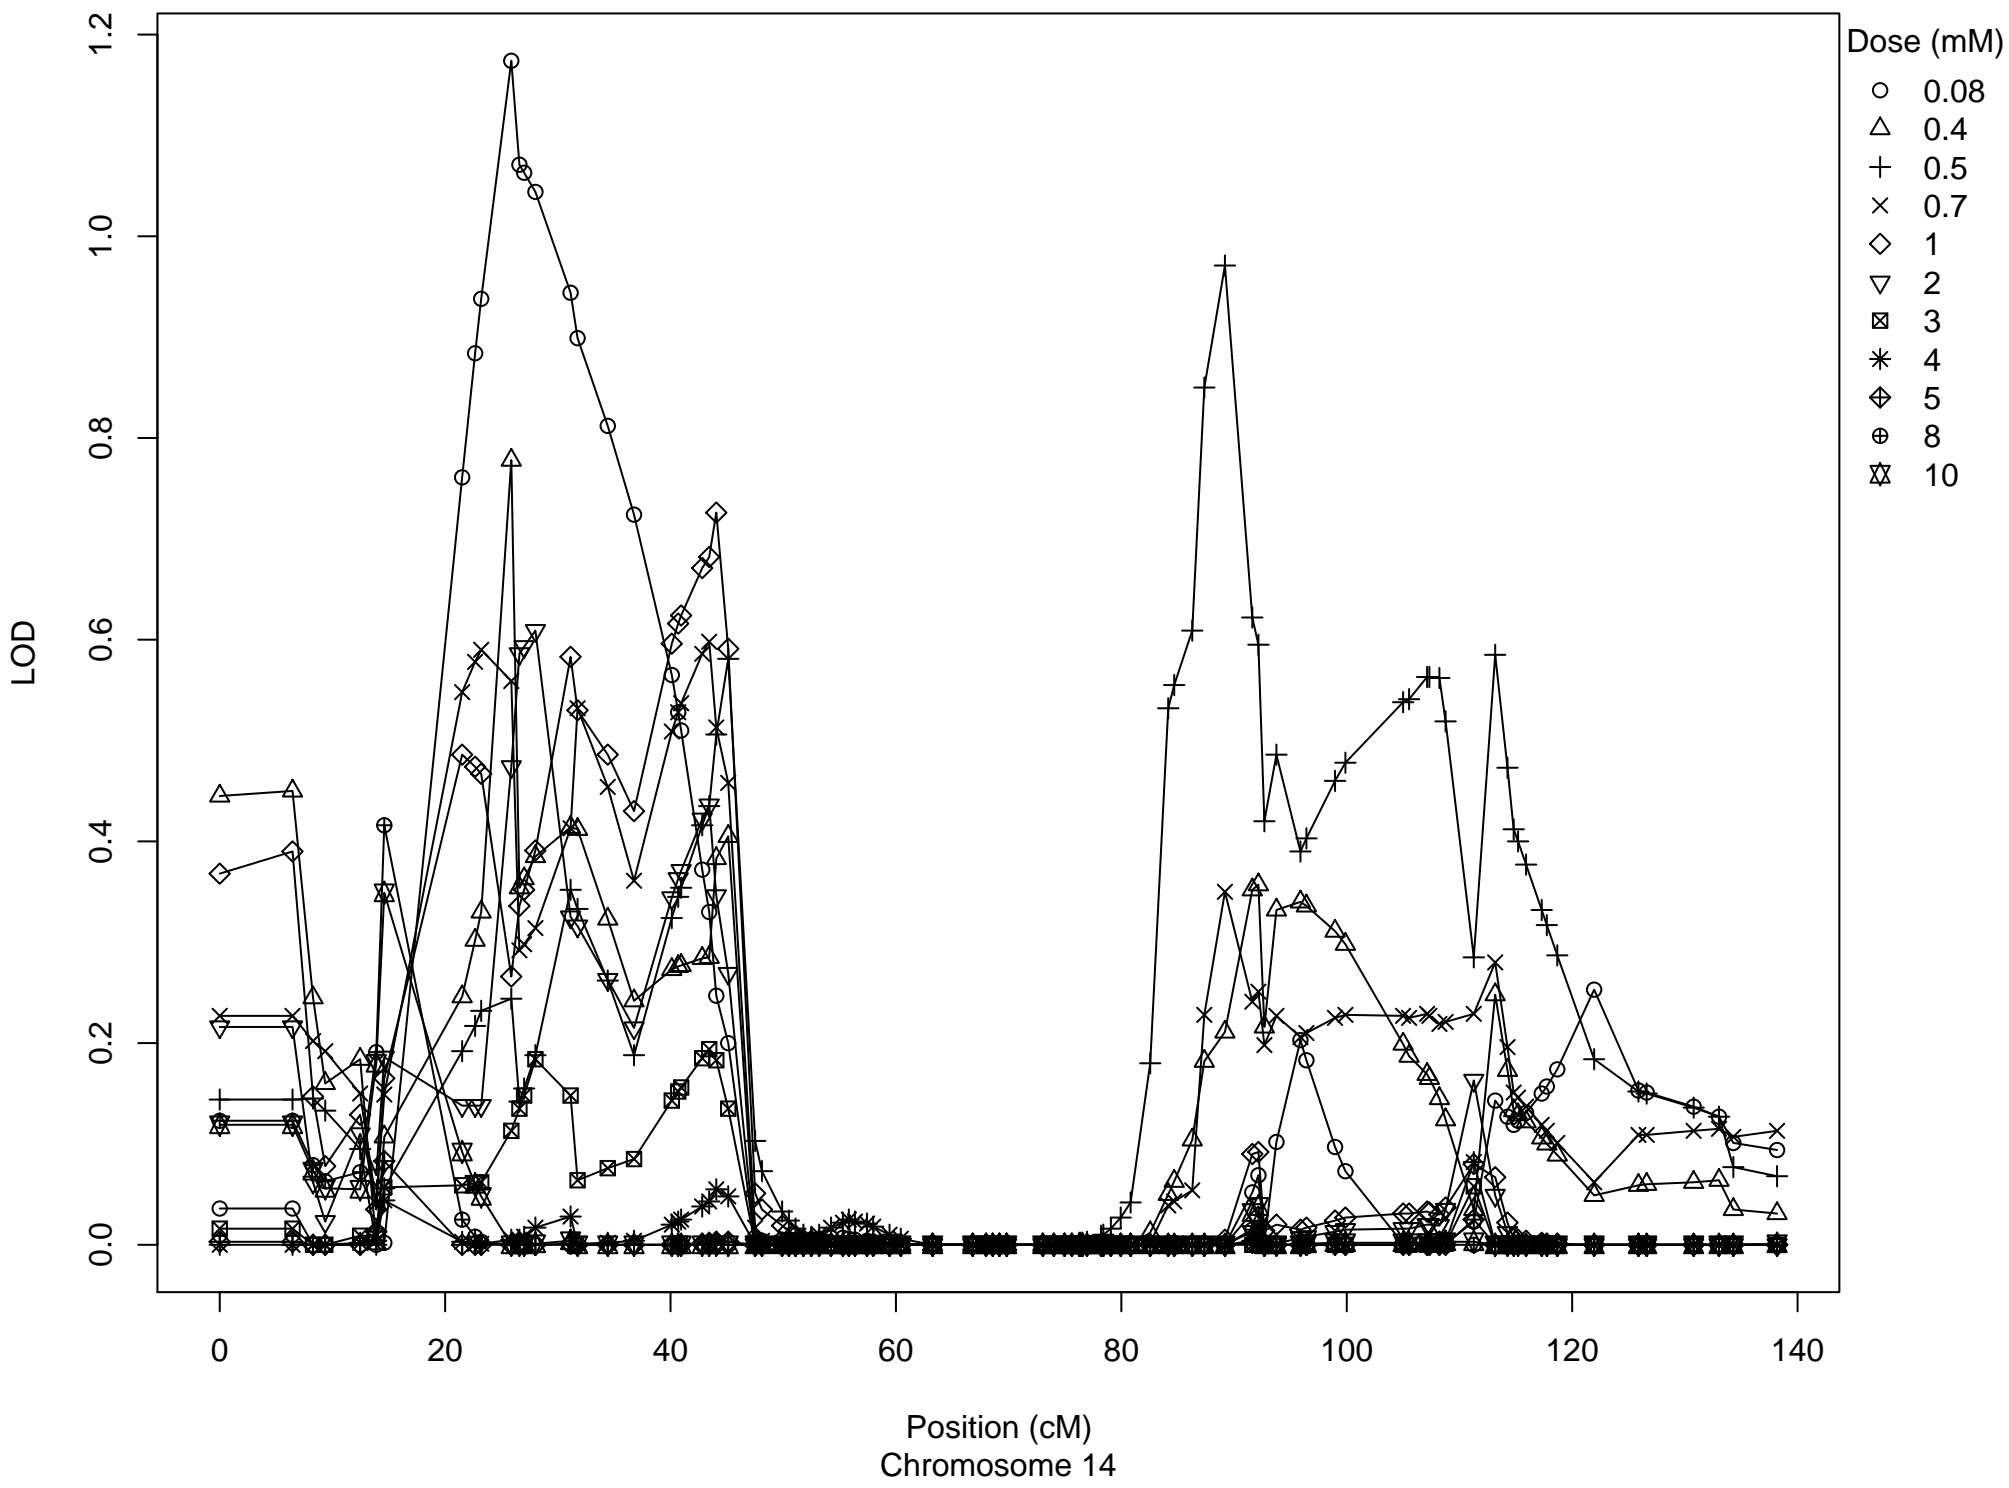

# 14-chloro-camptothecin (CICPT)

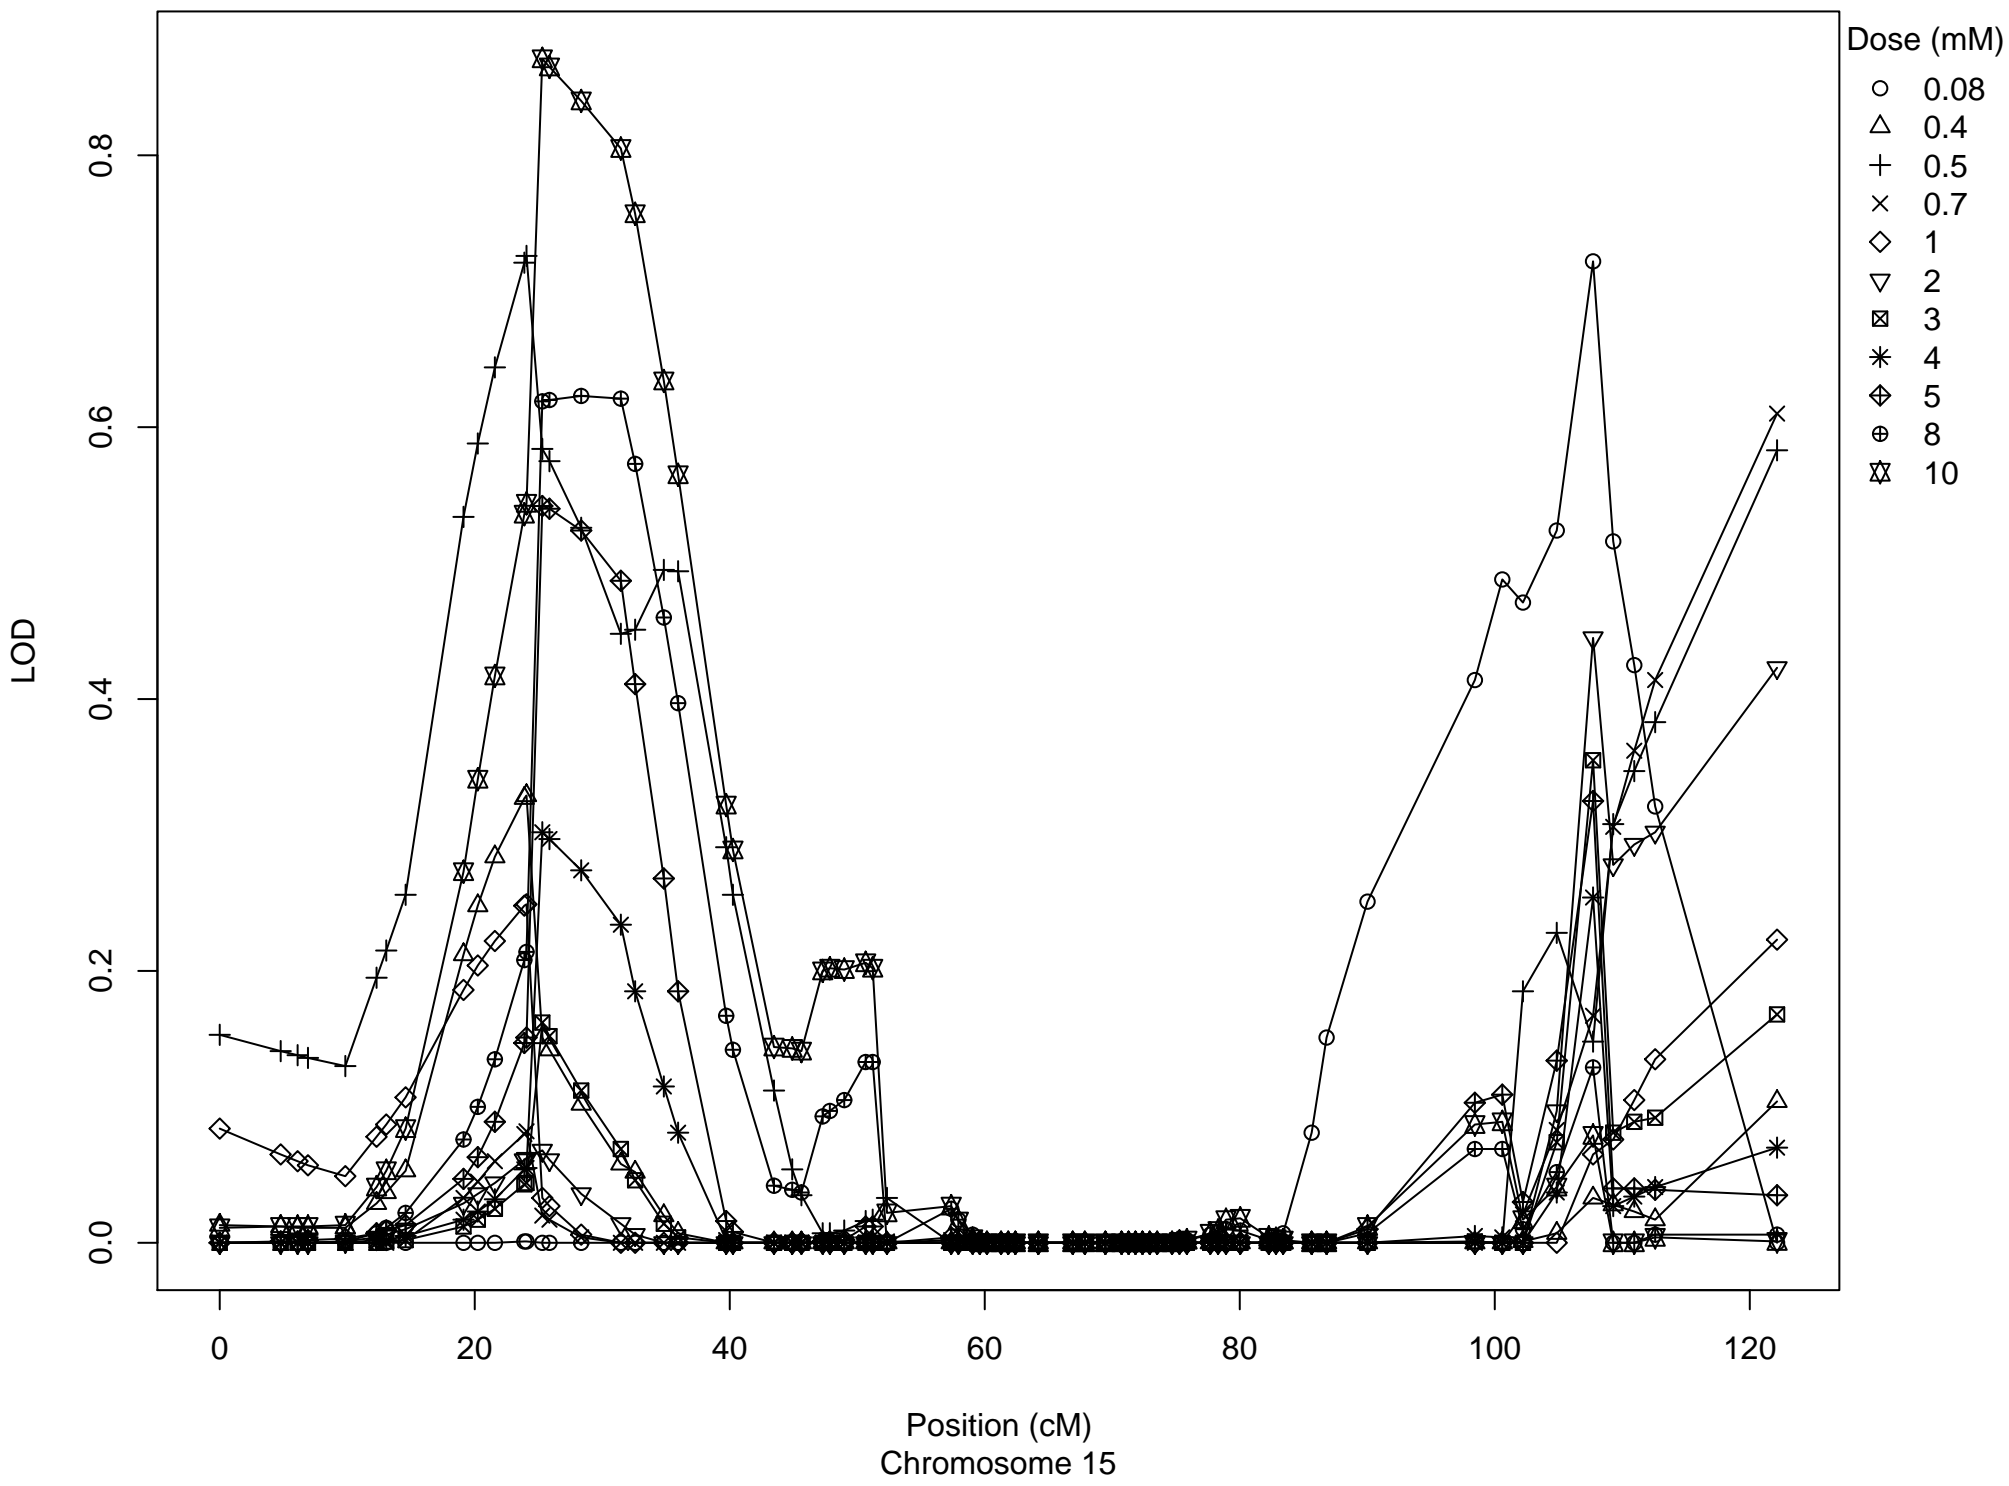

# 14-chloro-camptothecin (CICPT)

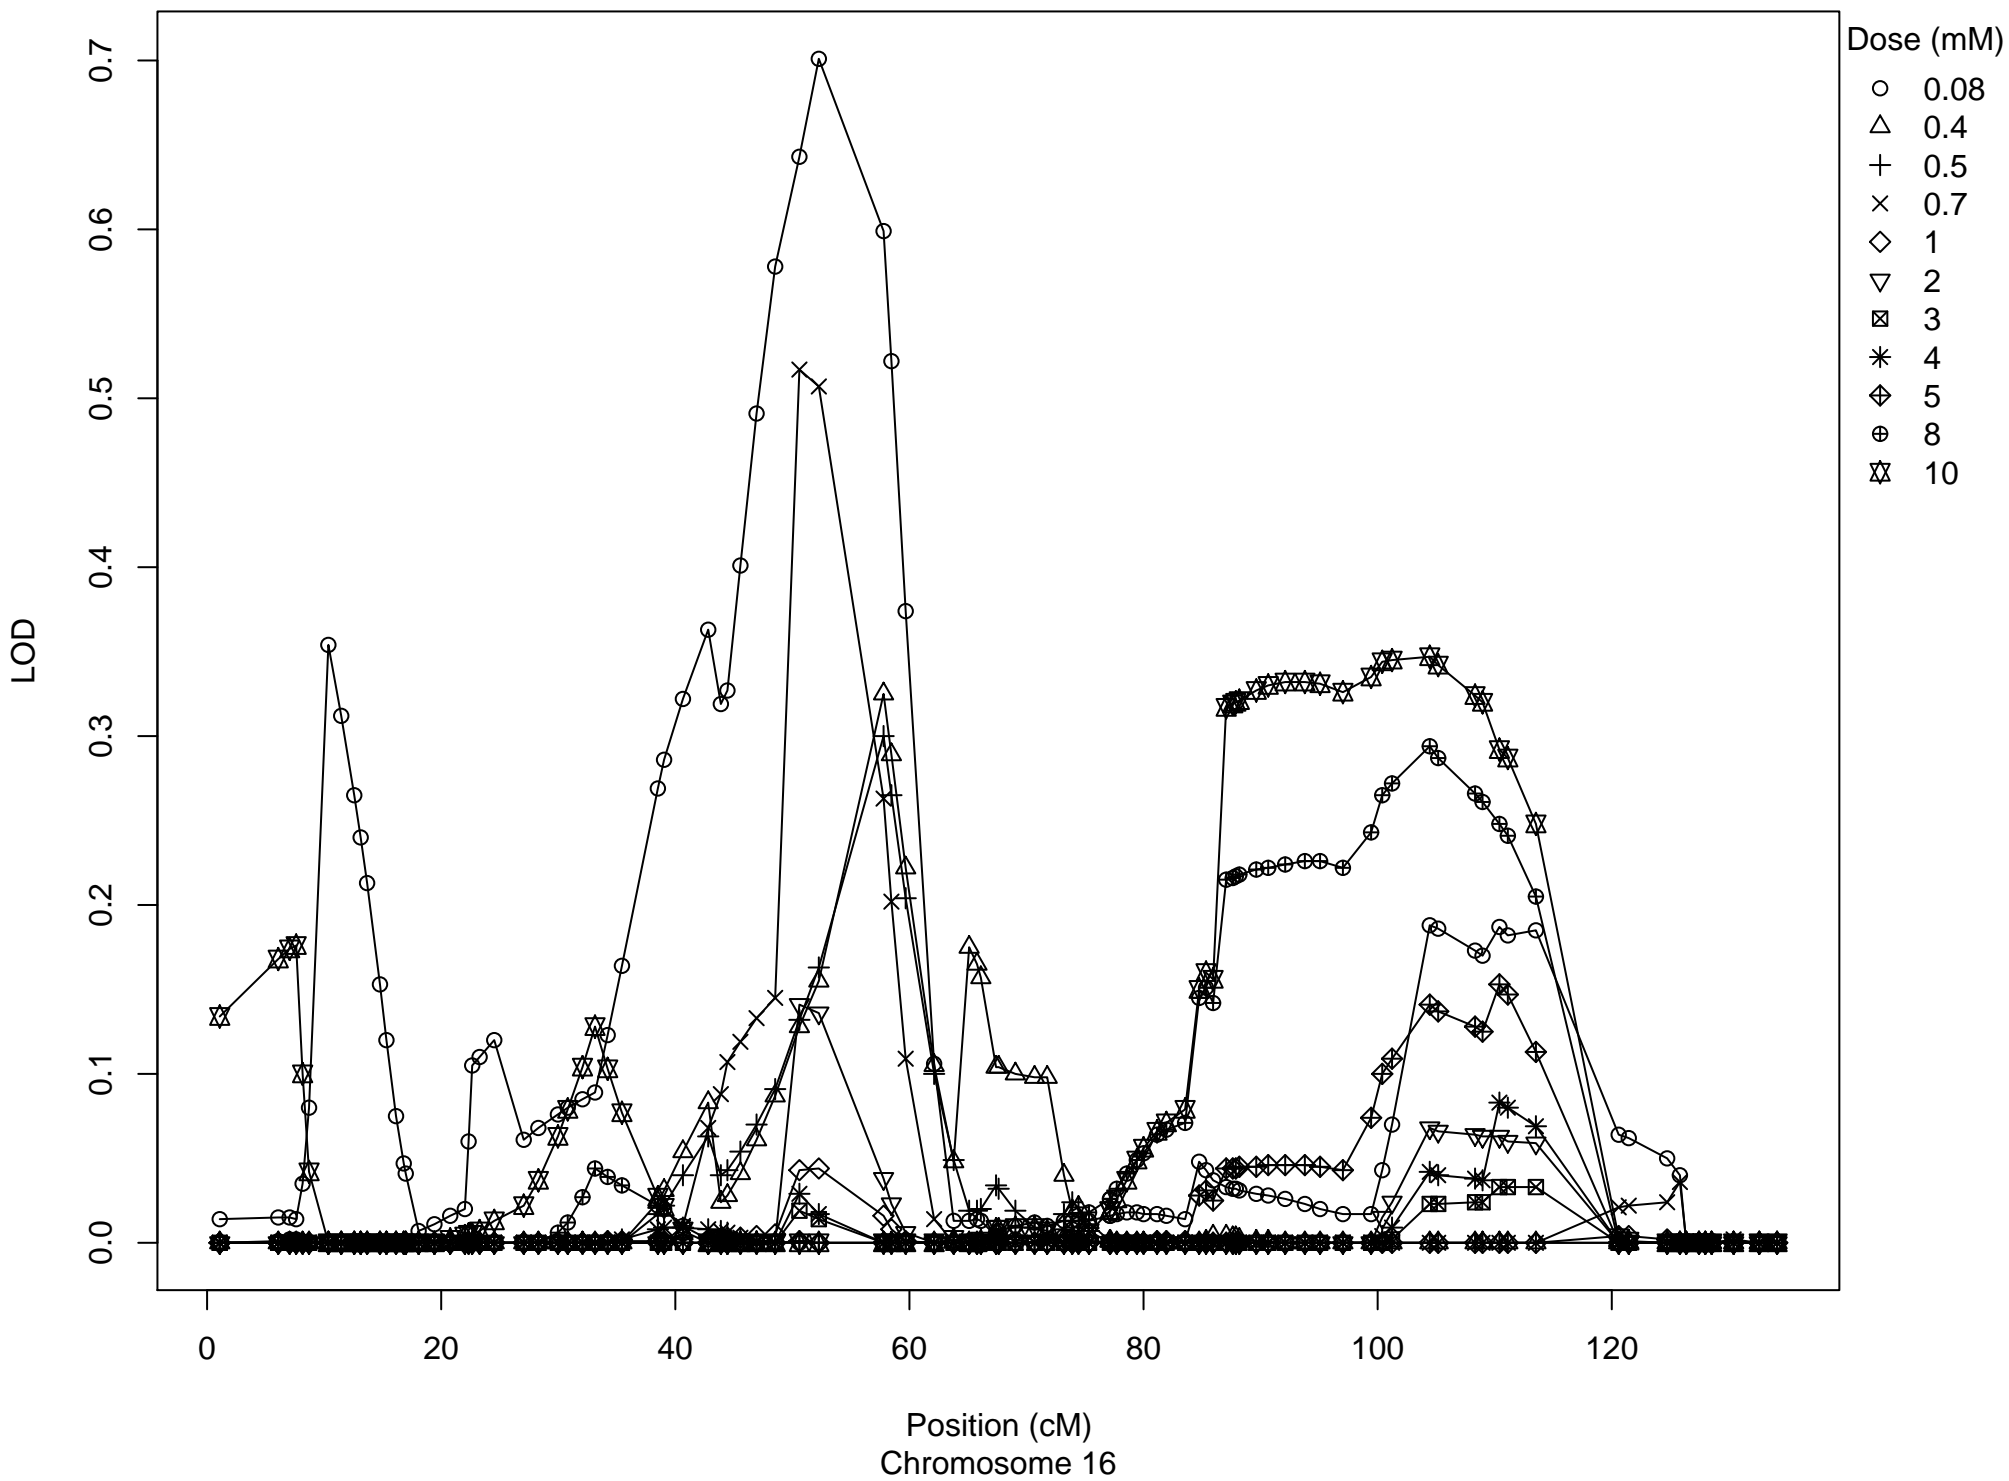



# 14-chloro-camptothecin (CICPT)

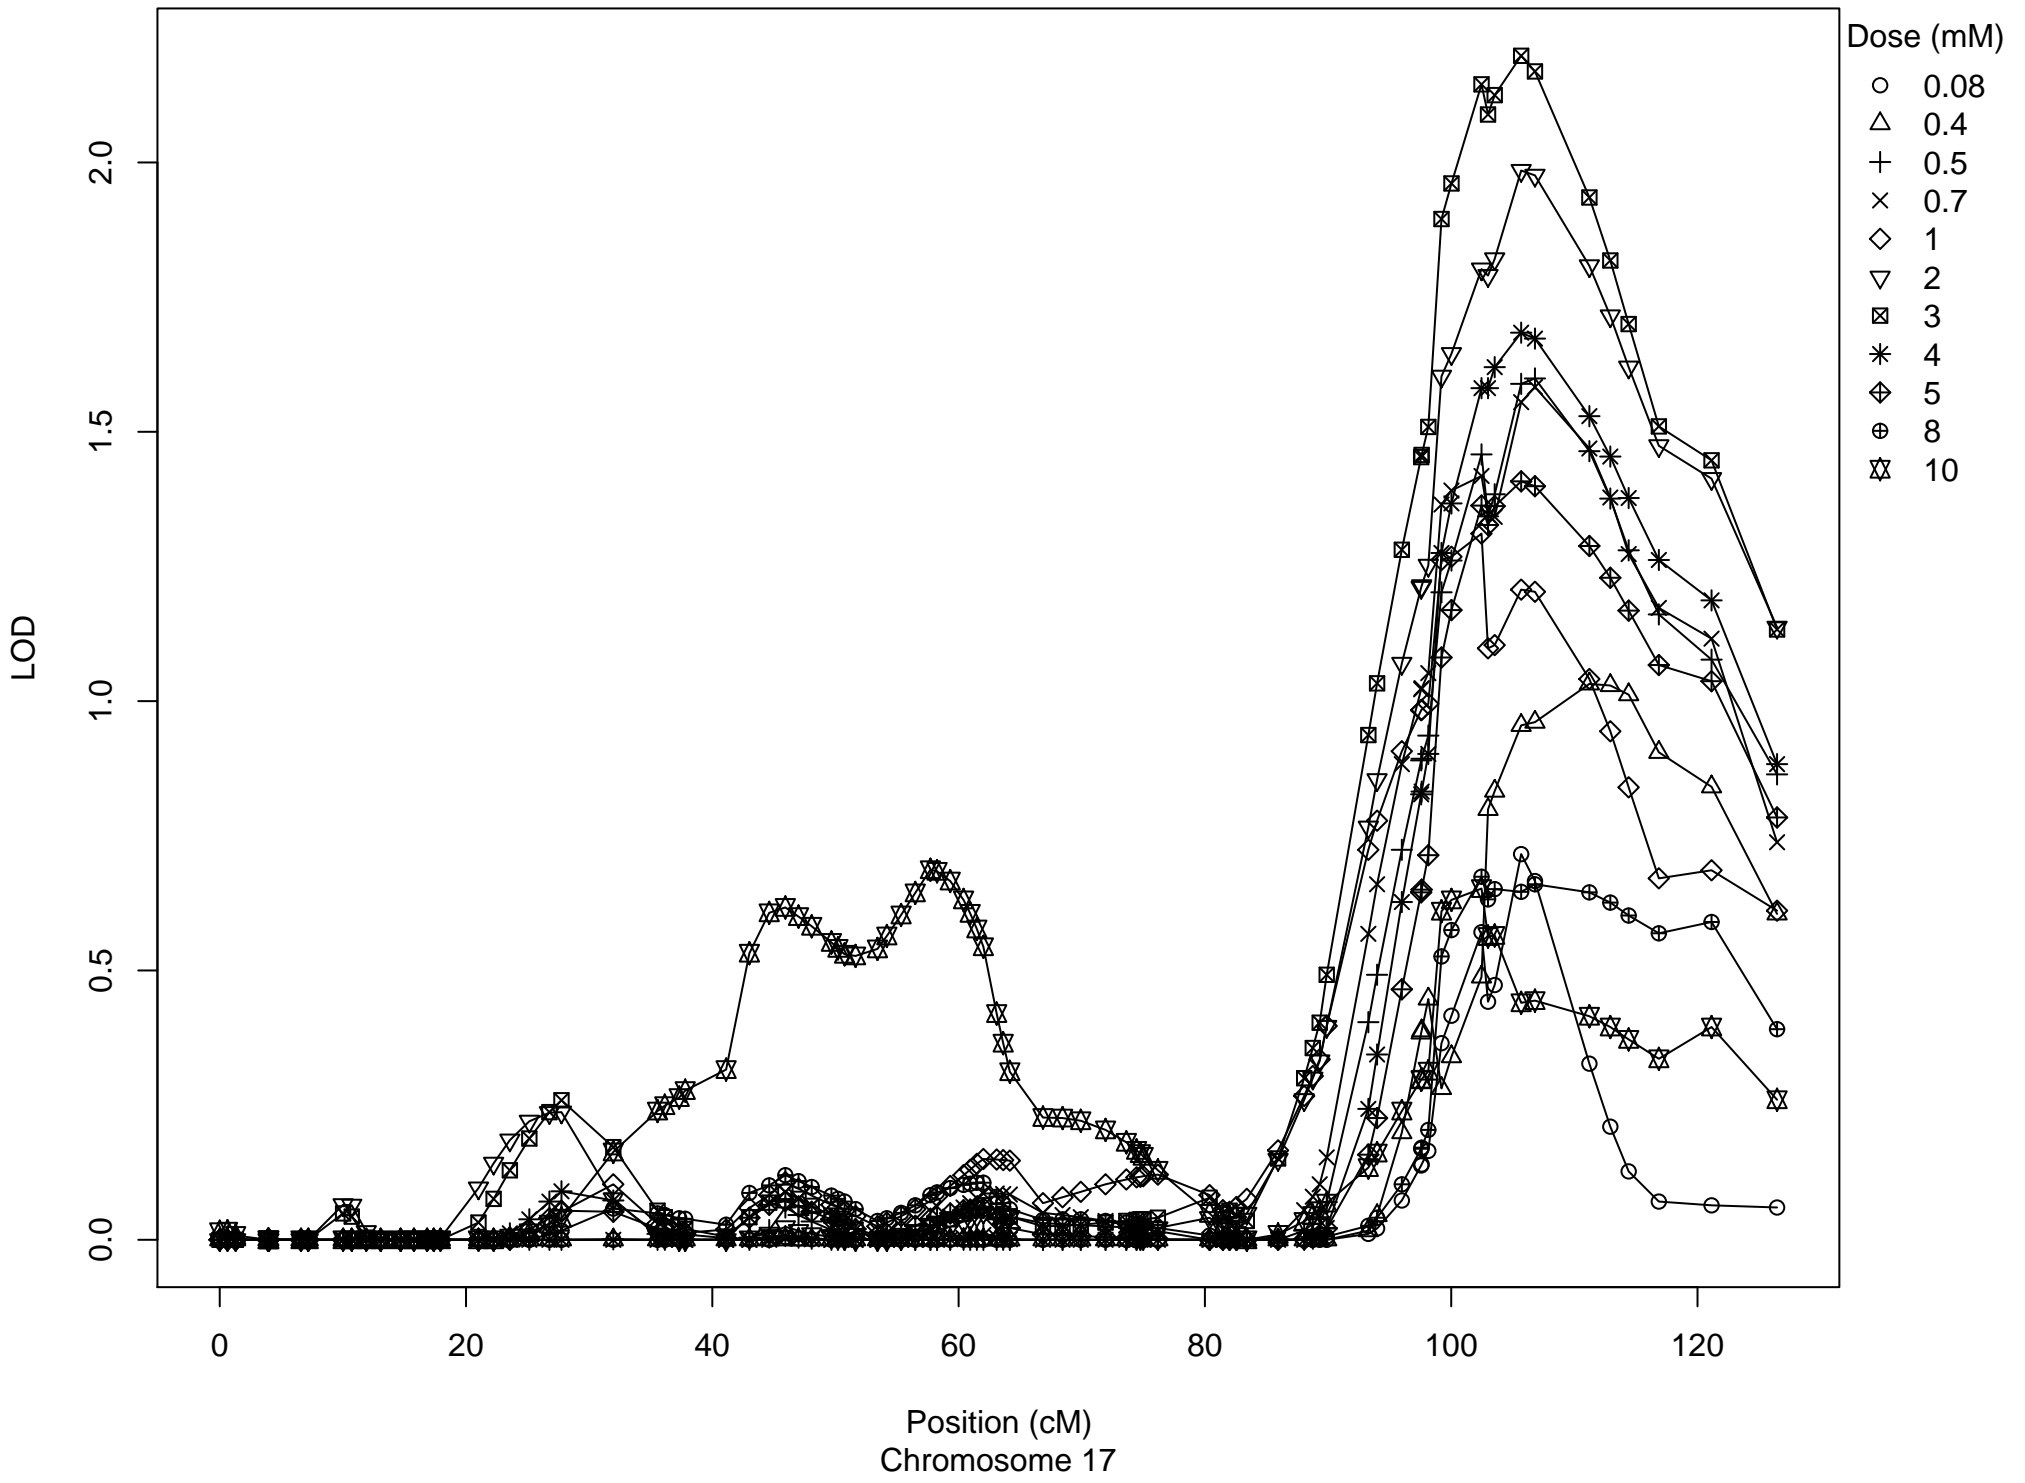

# 14-chloro-camptothecin (CICPT)

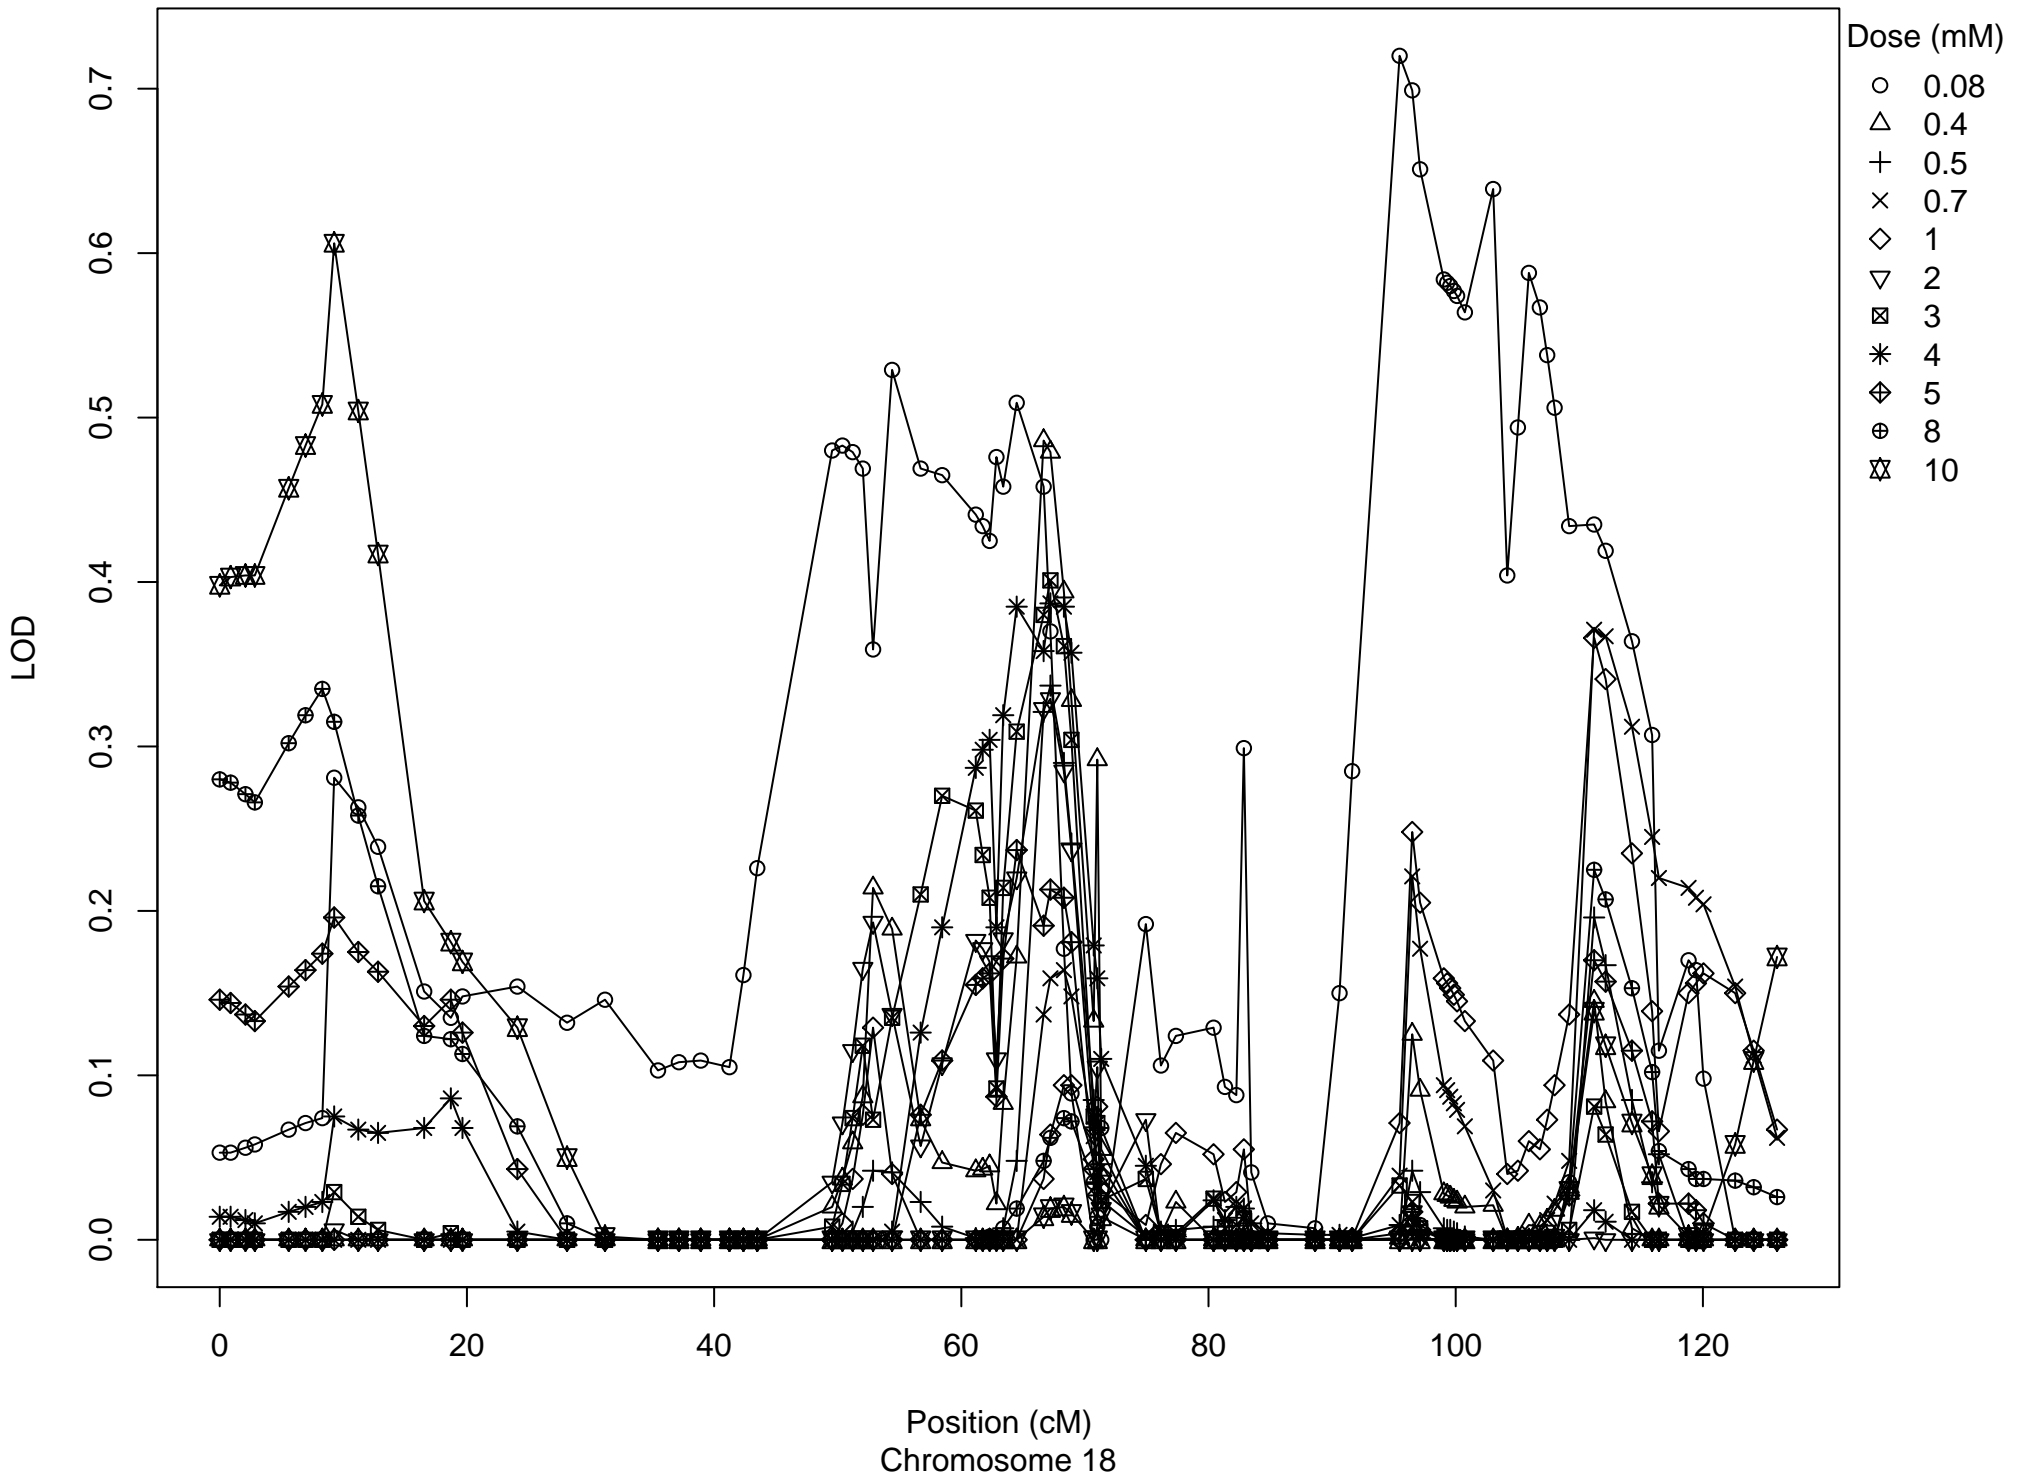

# 14-chloro-camptothecin (CICPT)

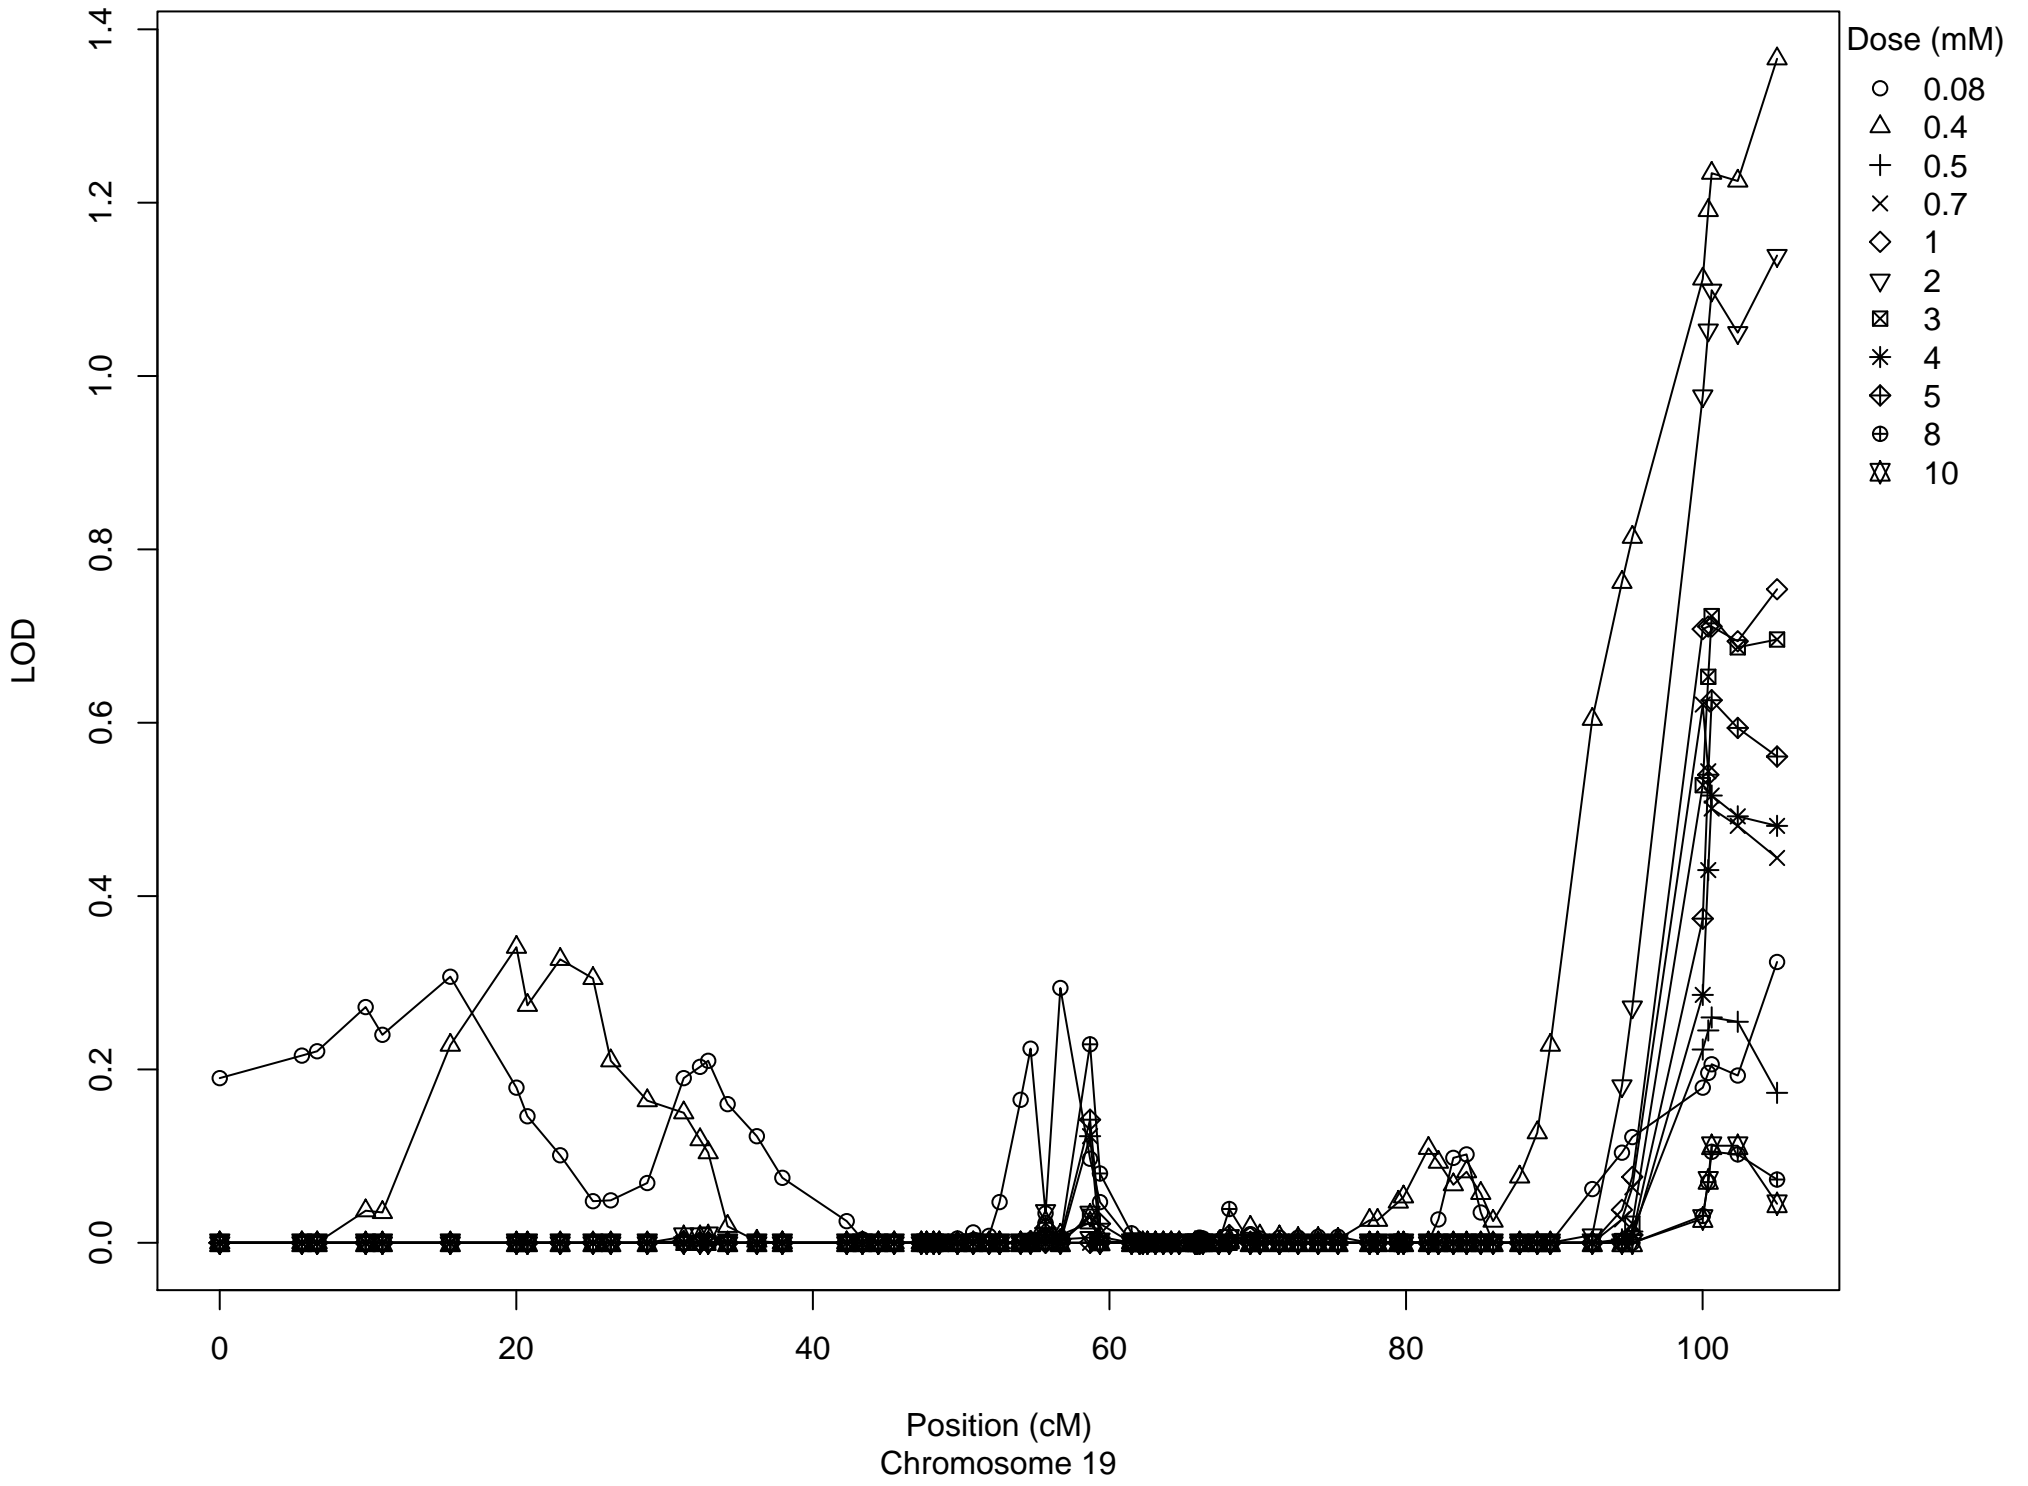

# 14-chloro-camptothecin (CICPT)

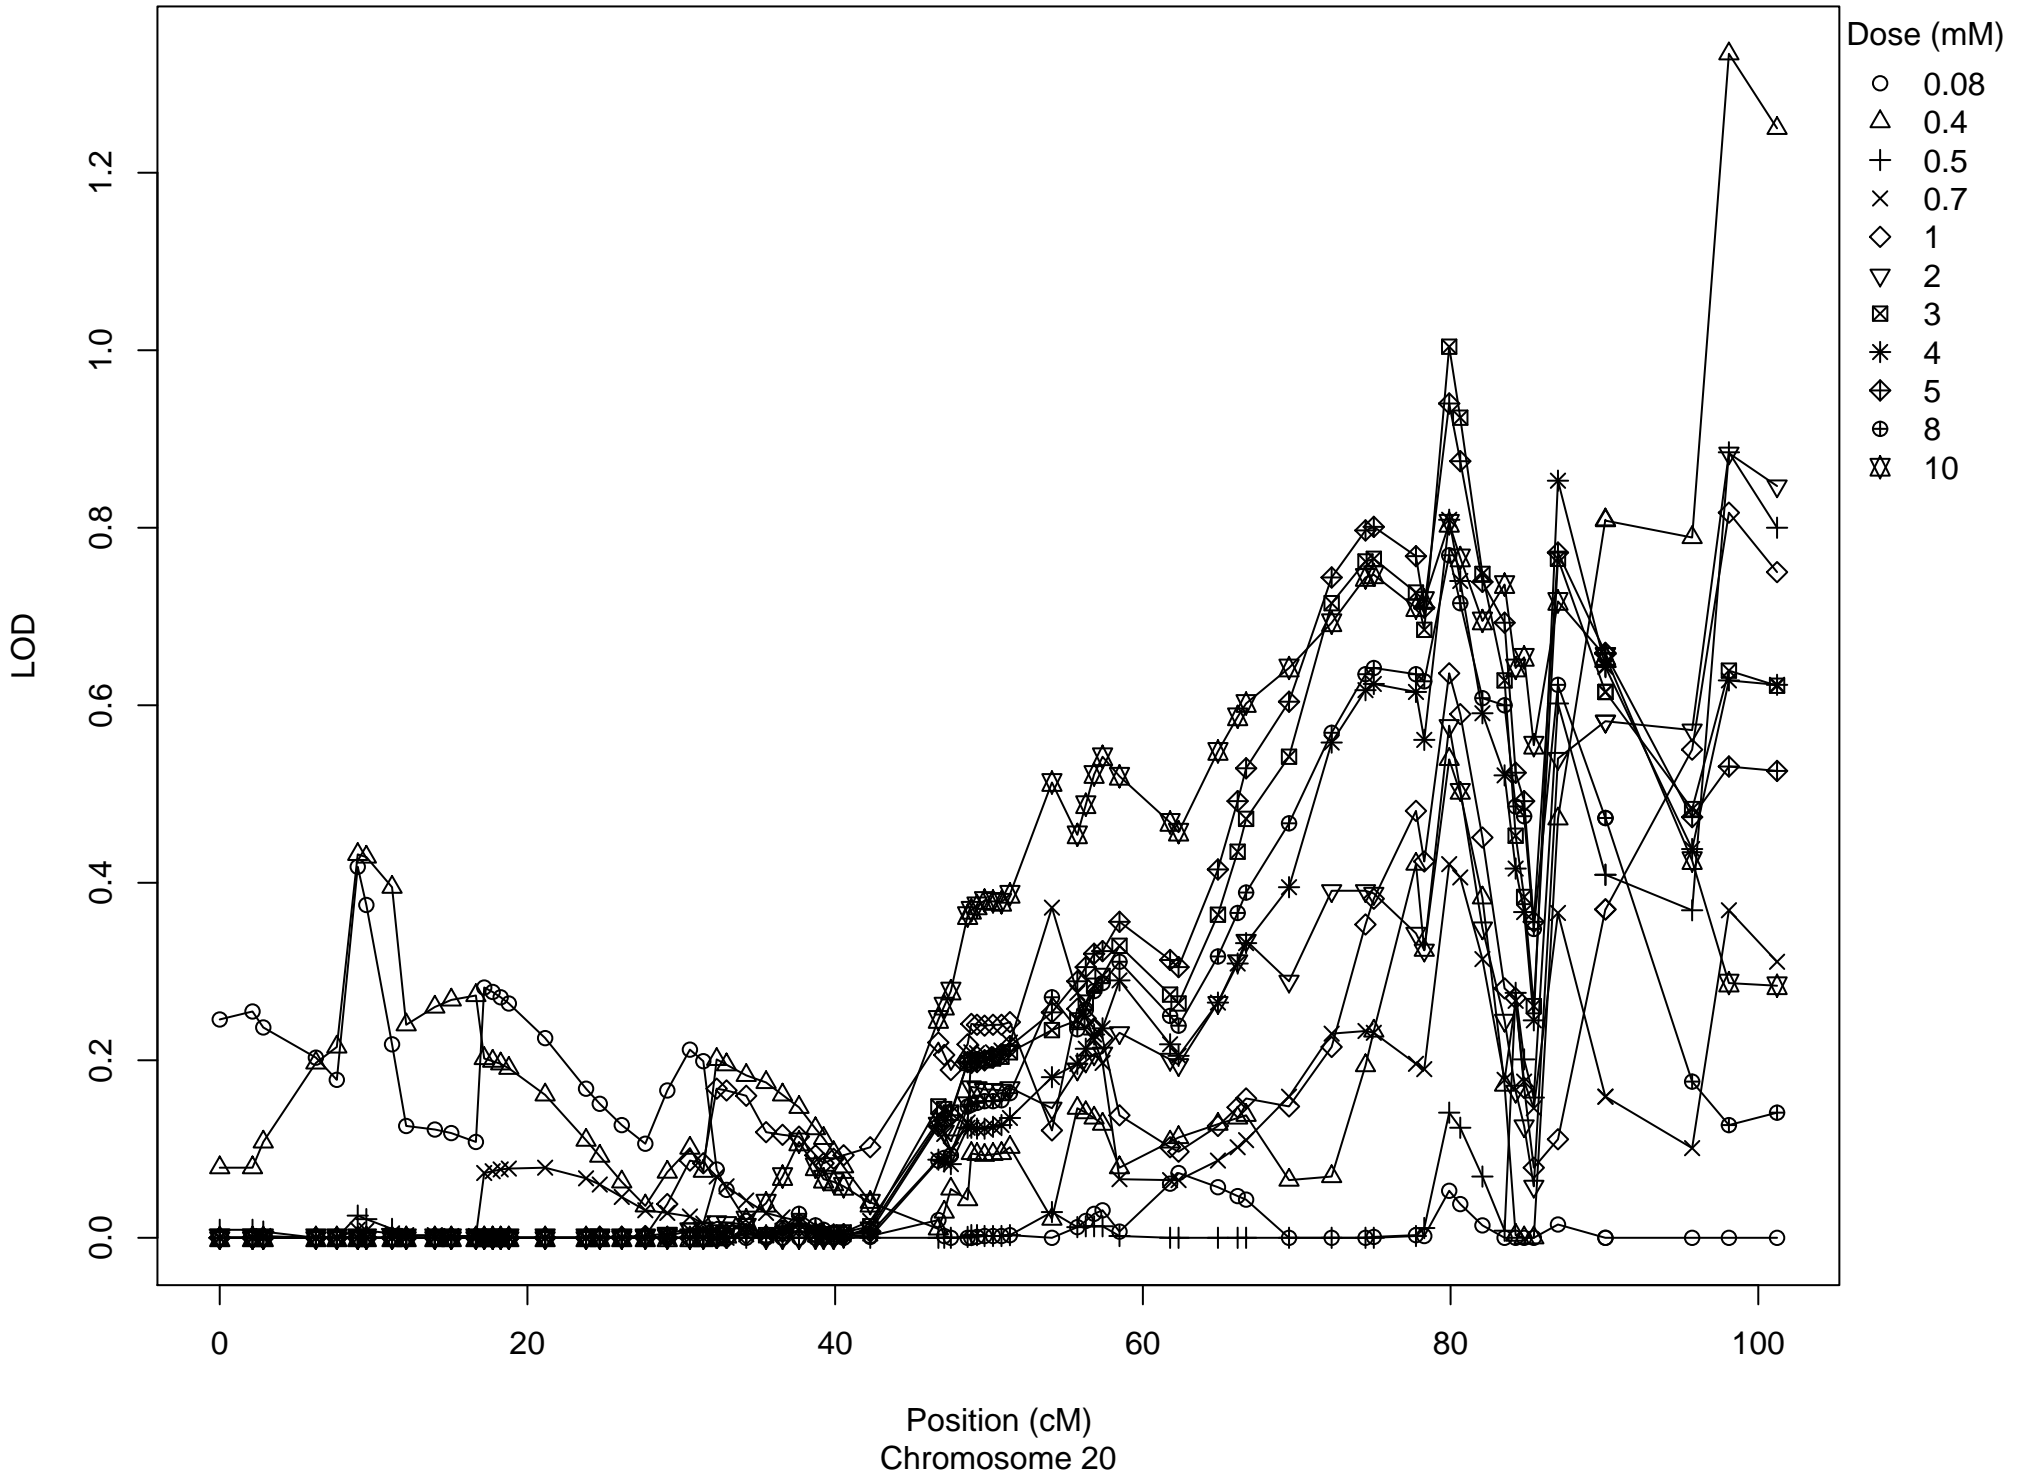



# 14-chloro-camptothecin (CICPT)

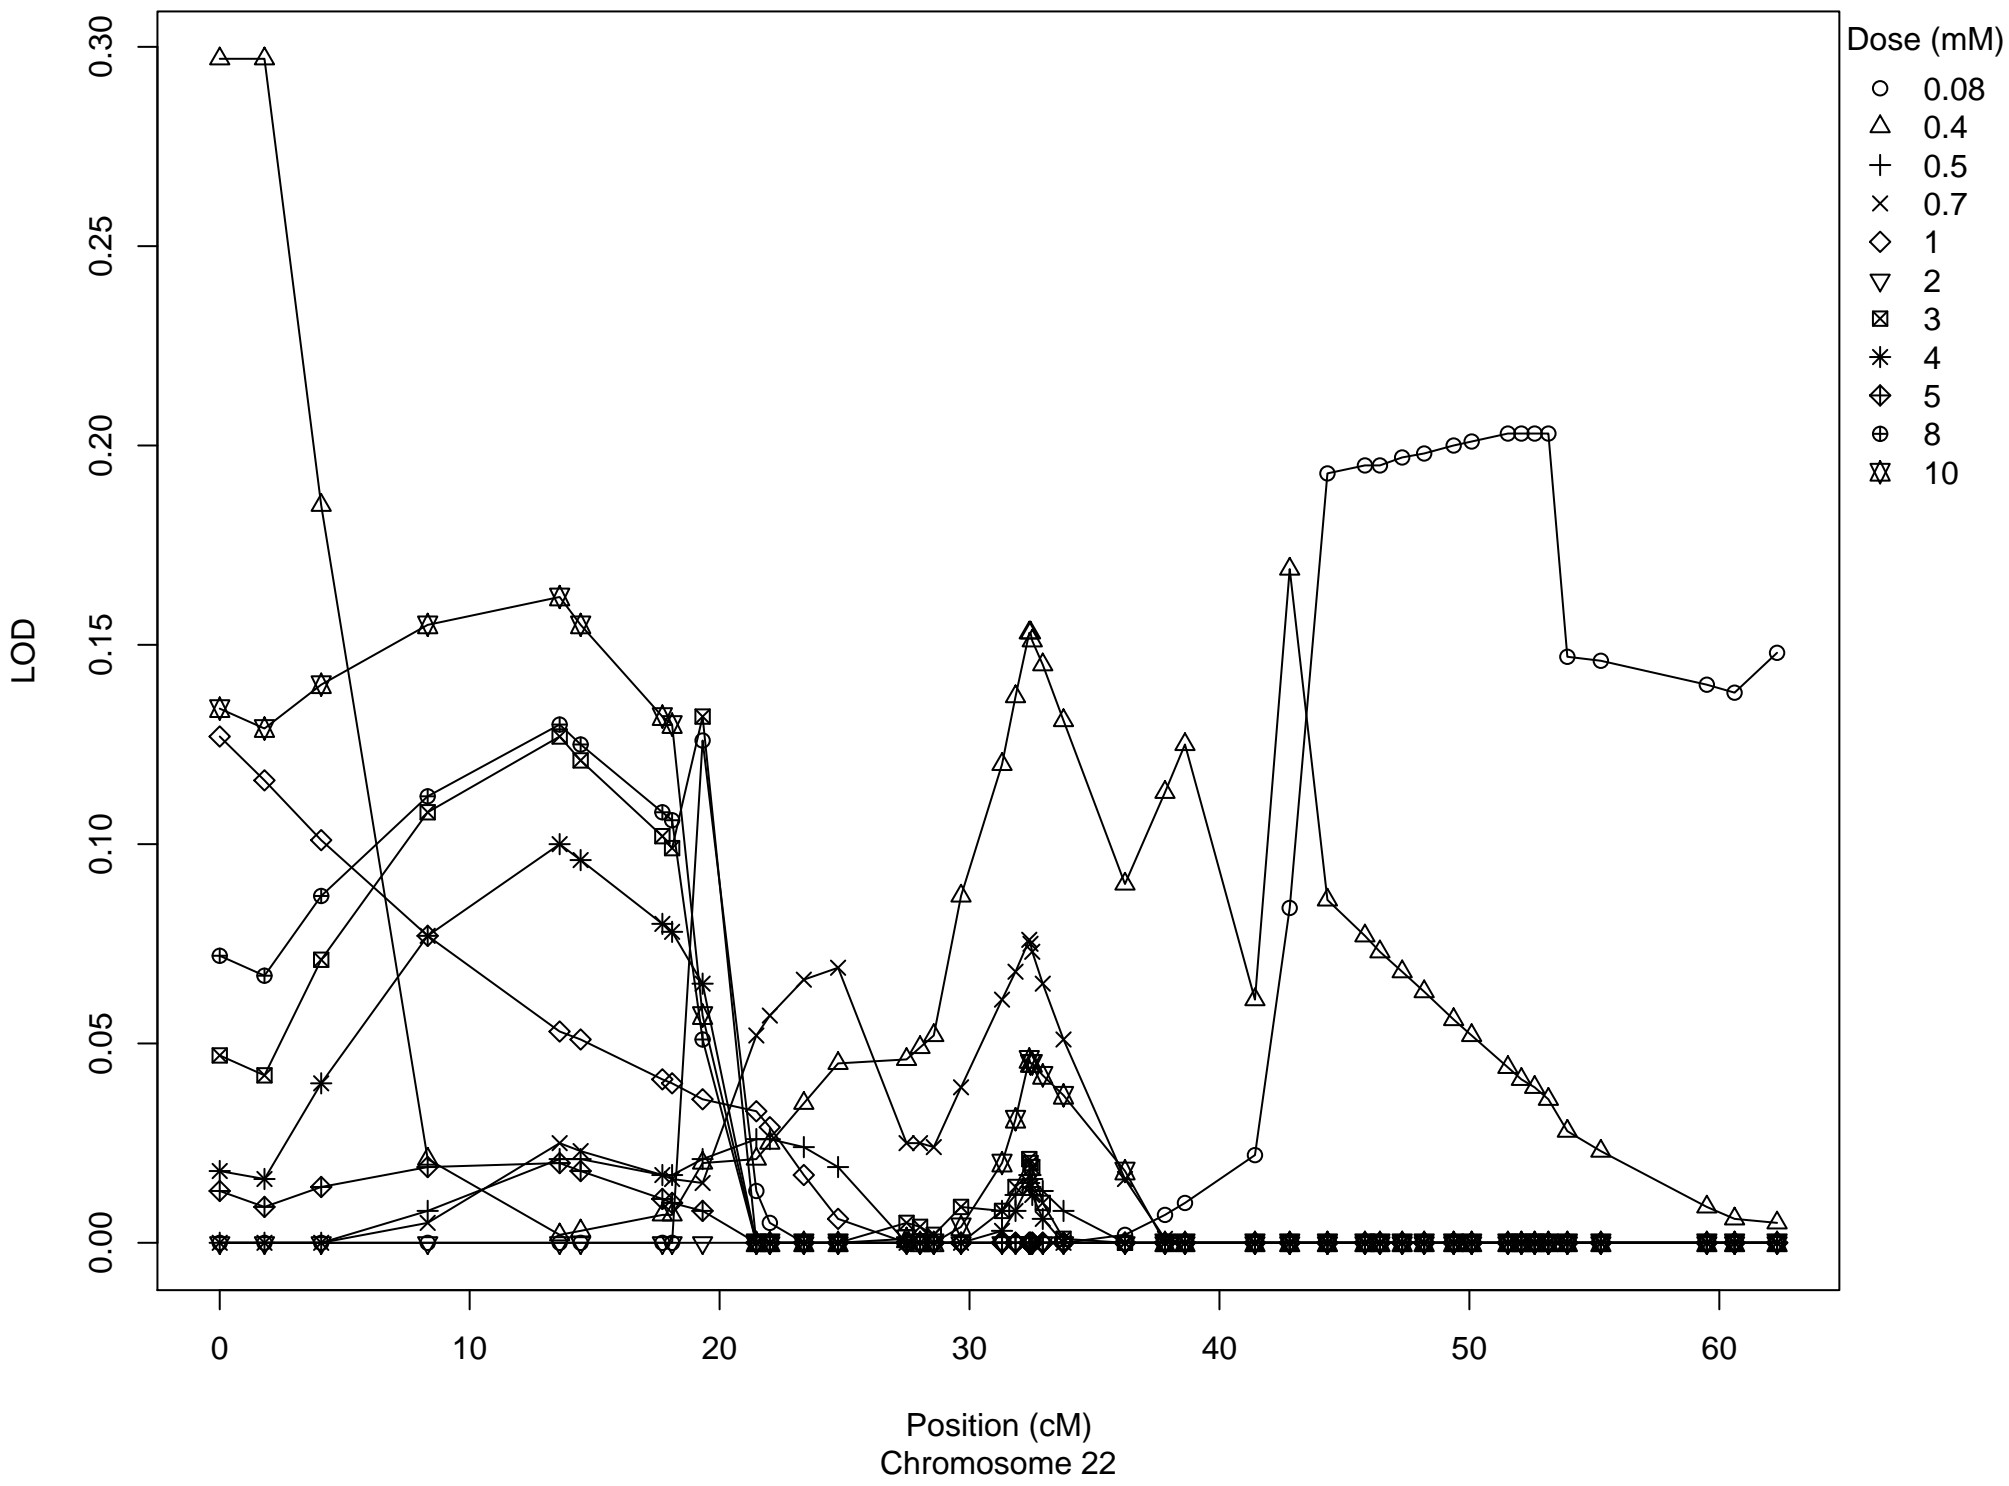

# Growth (1) (GR\_1)

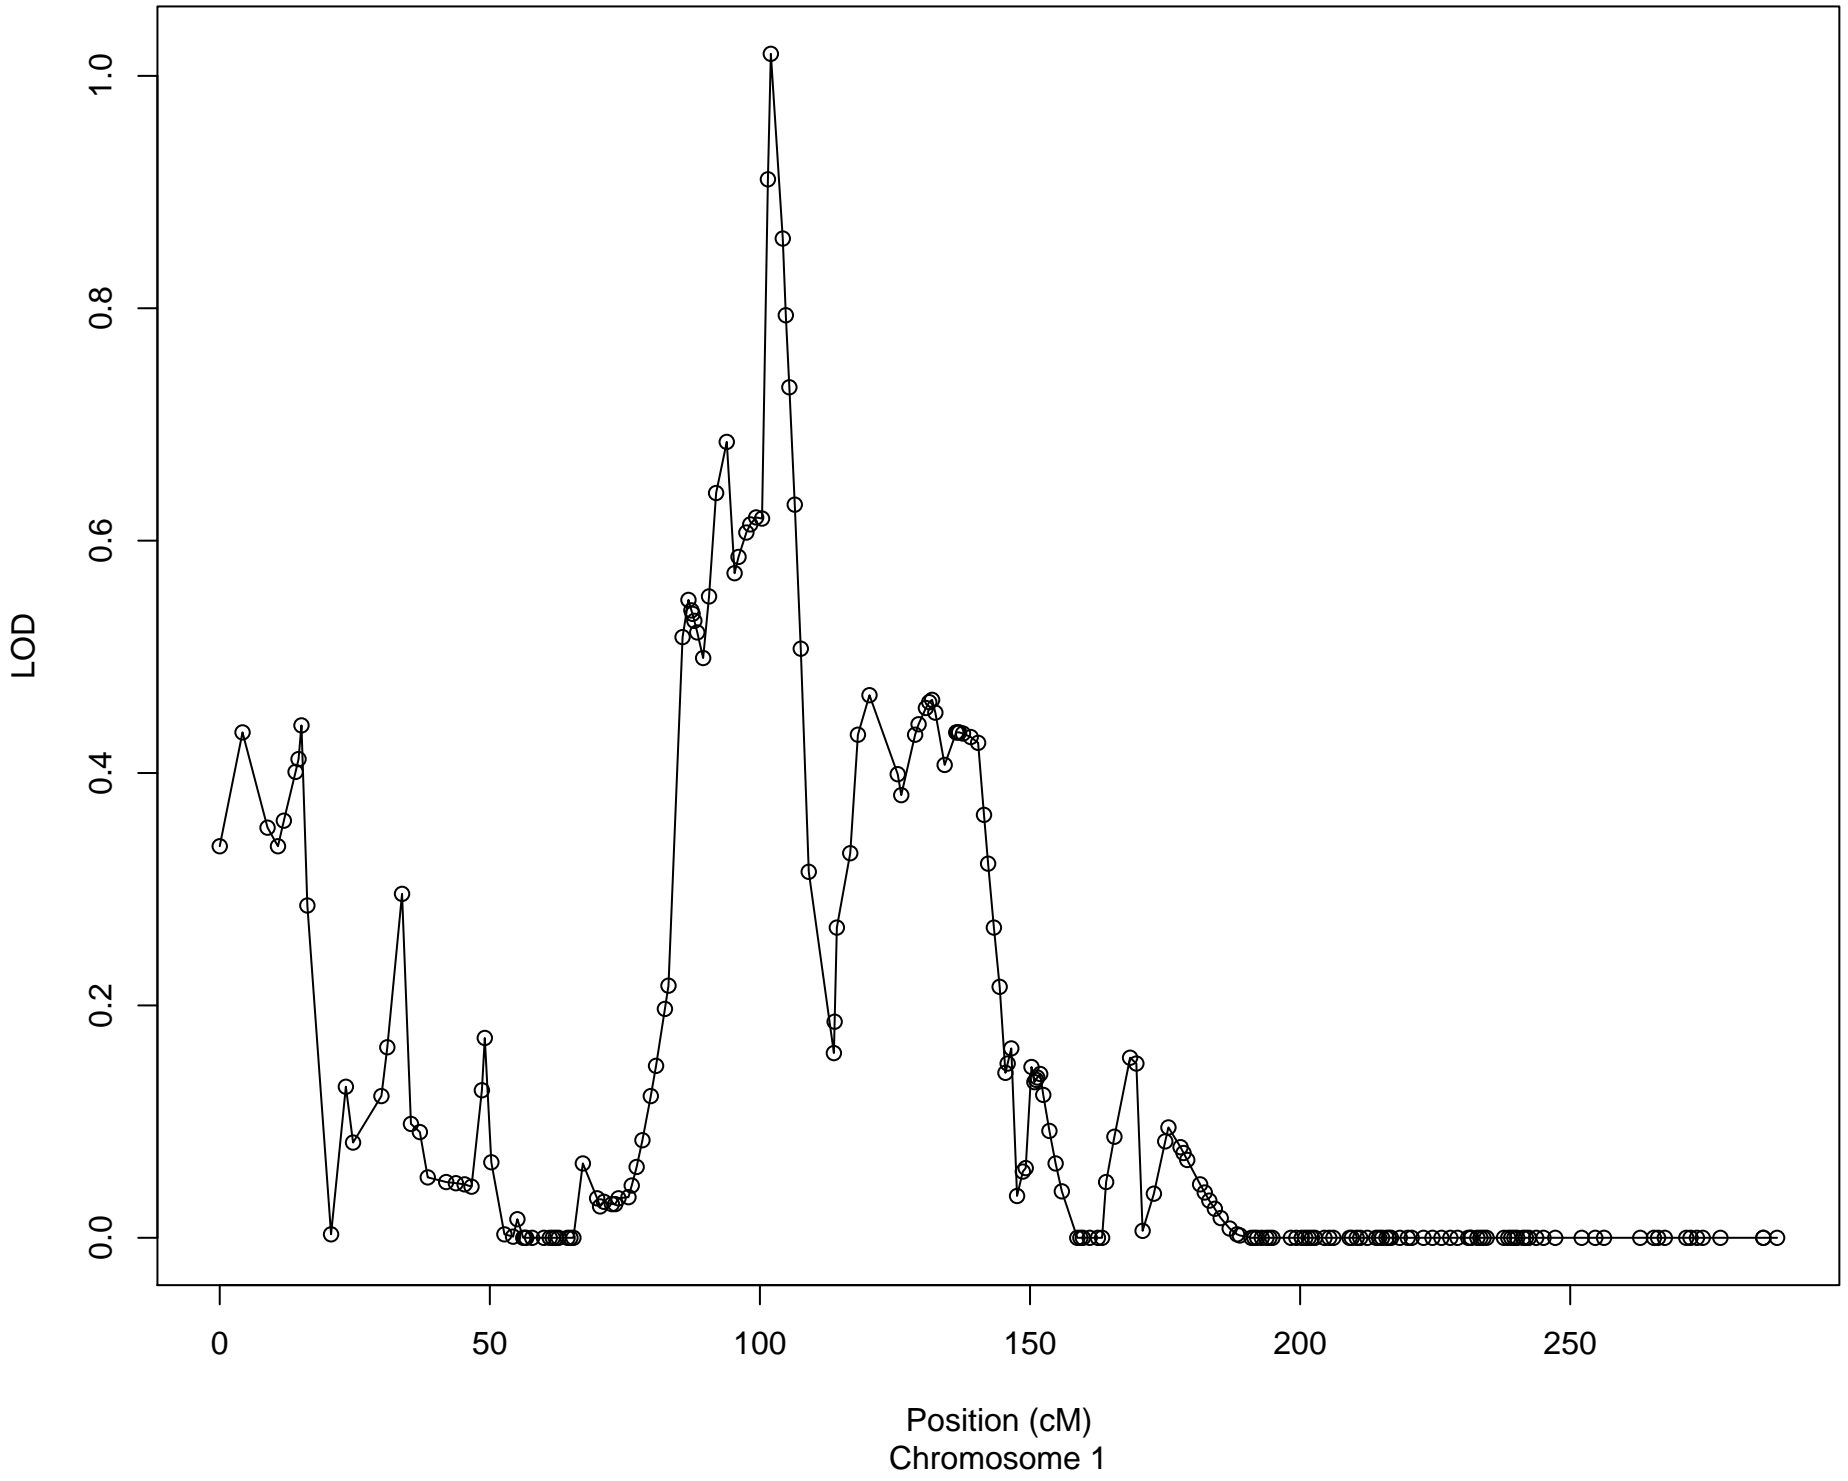

# Growth (1) (GR\_1)

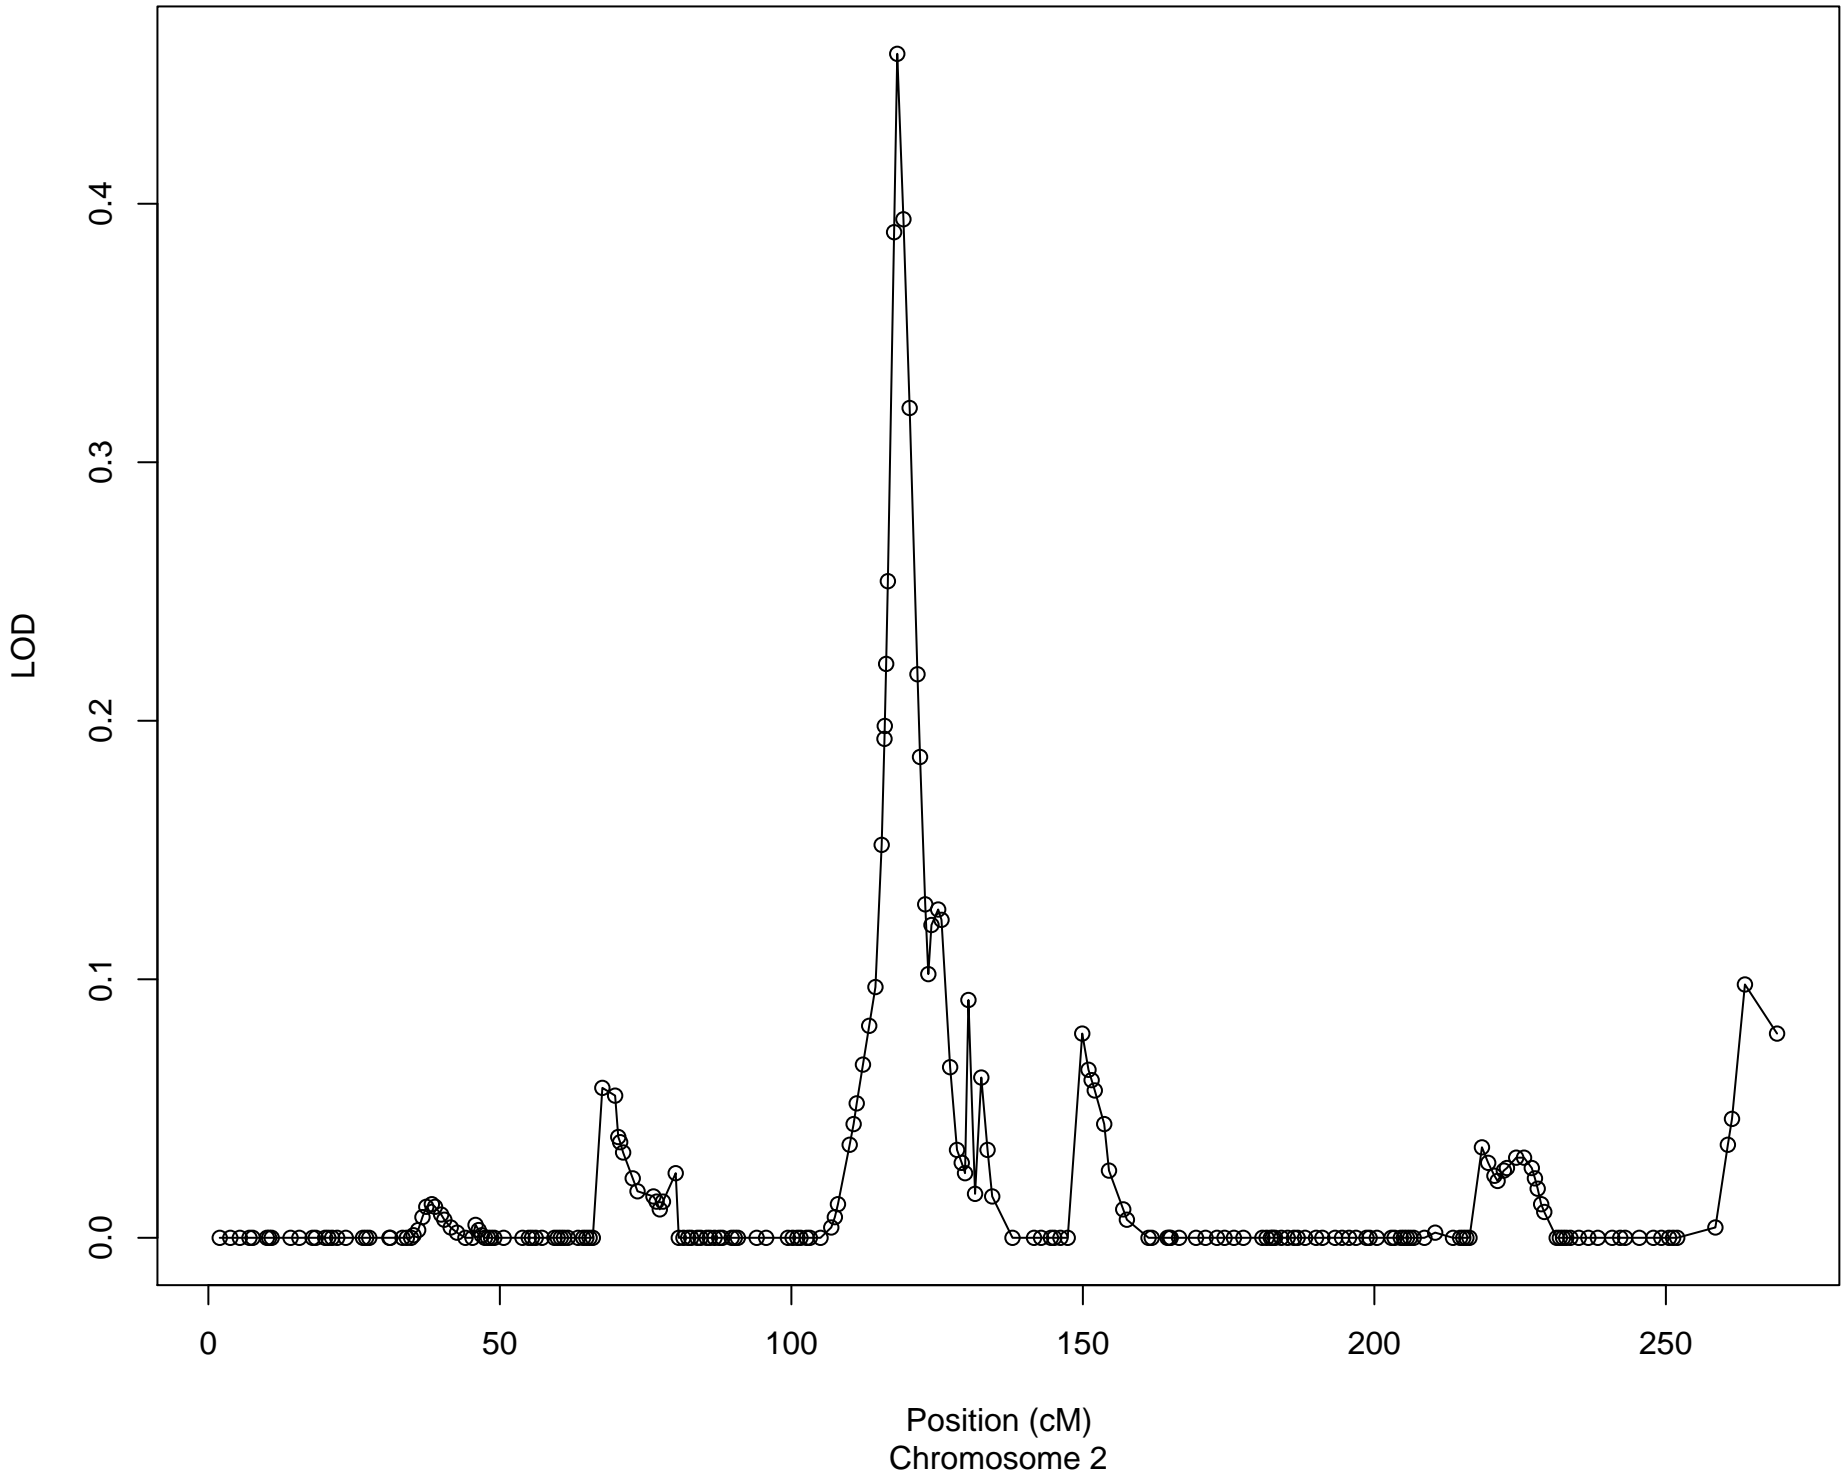



# Growth (1) (GR\_1)

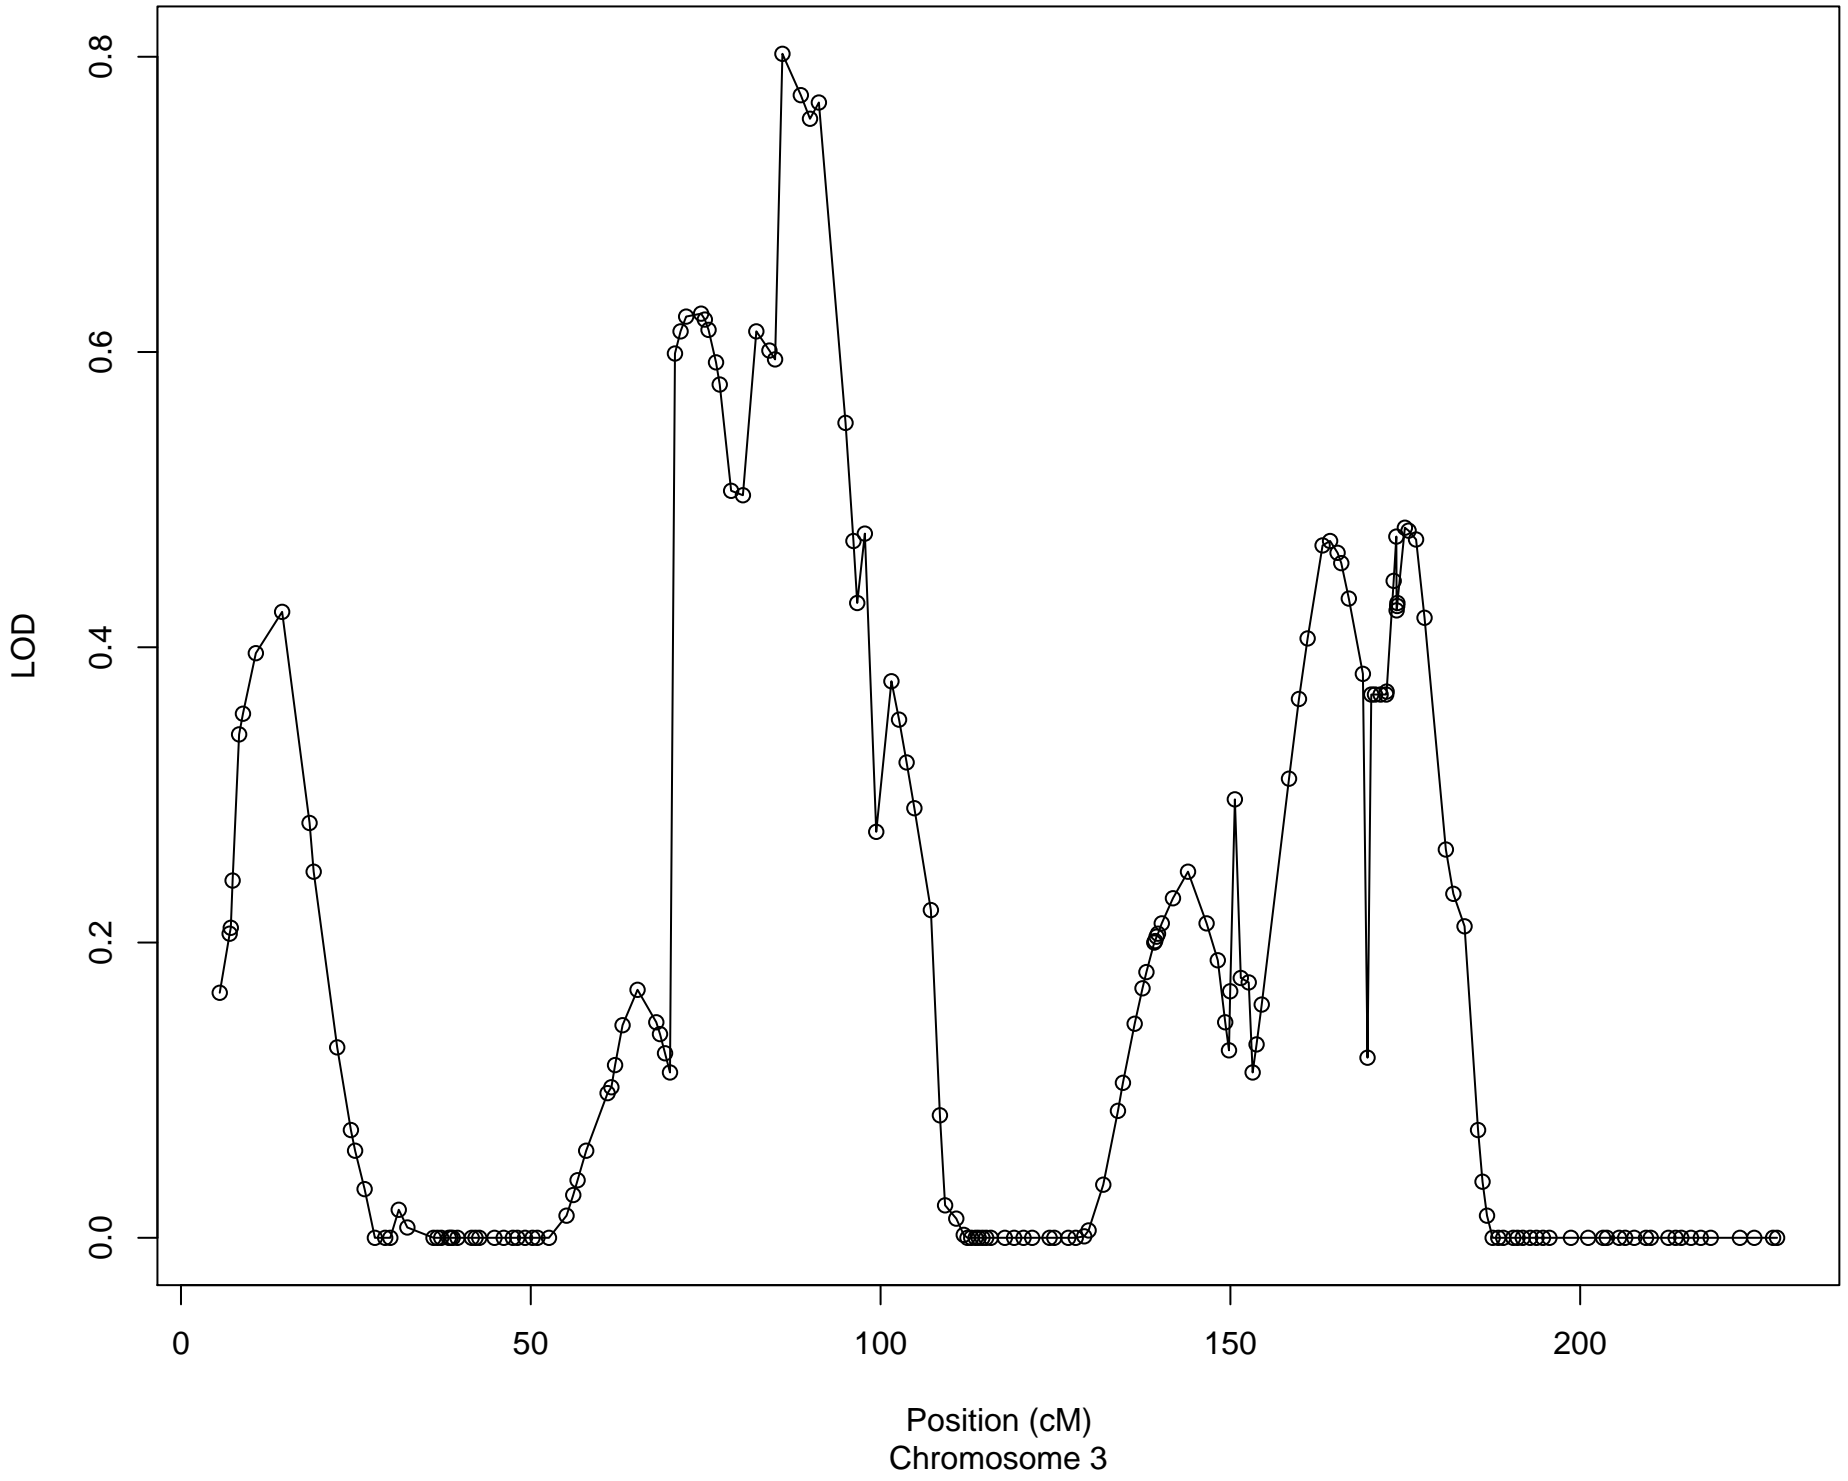

# Growth (1) (GR\_1)

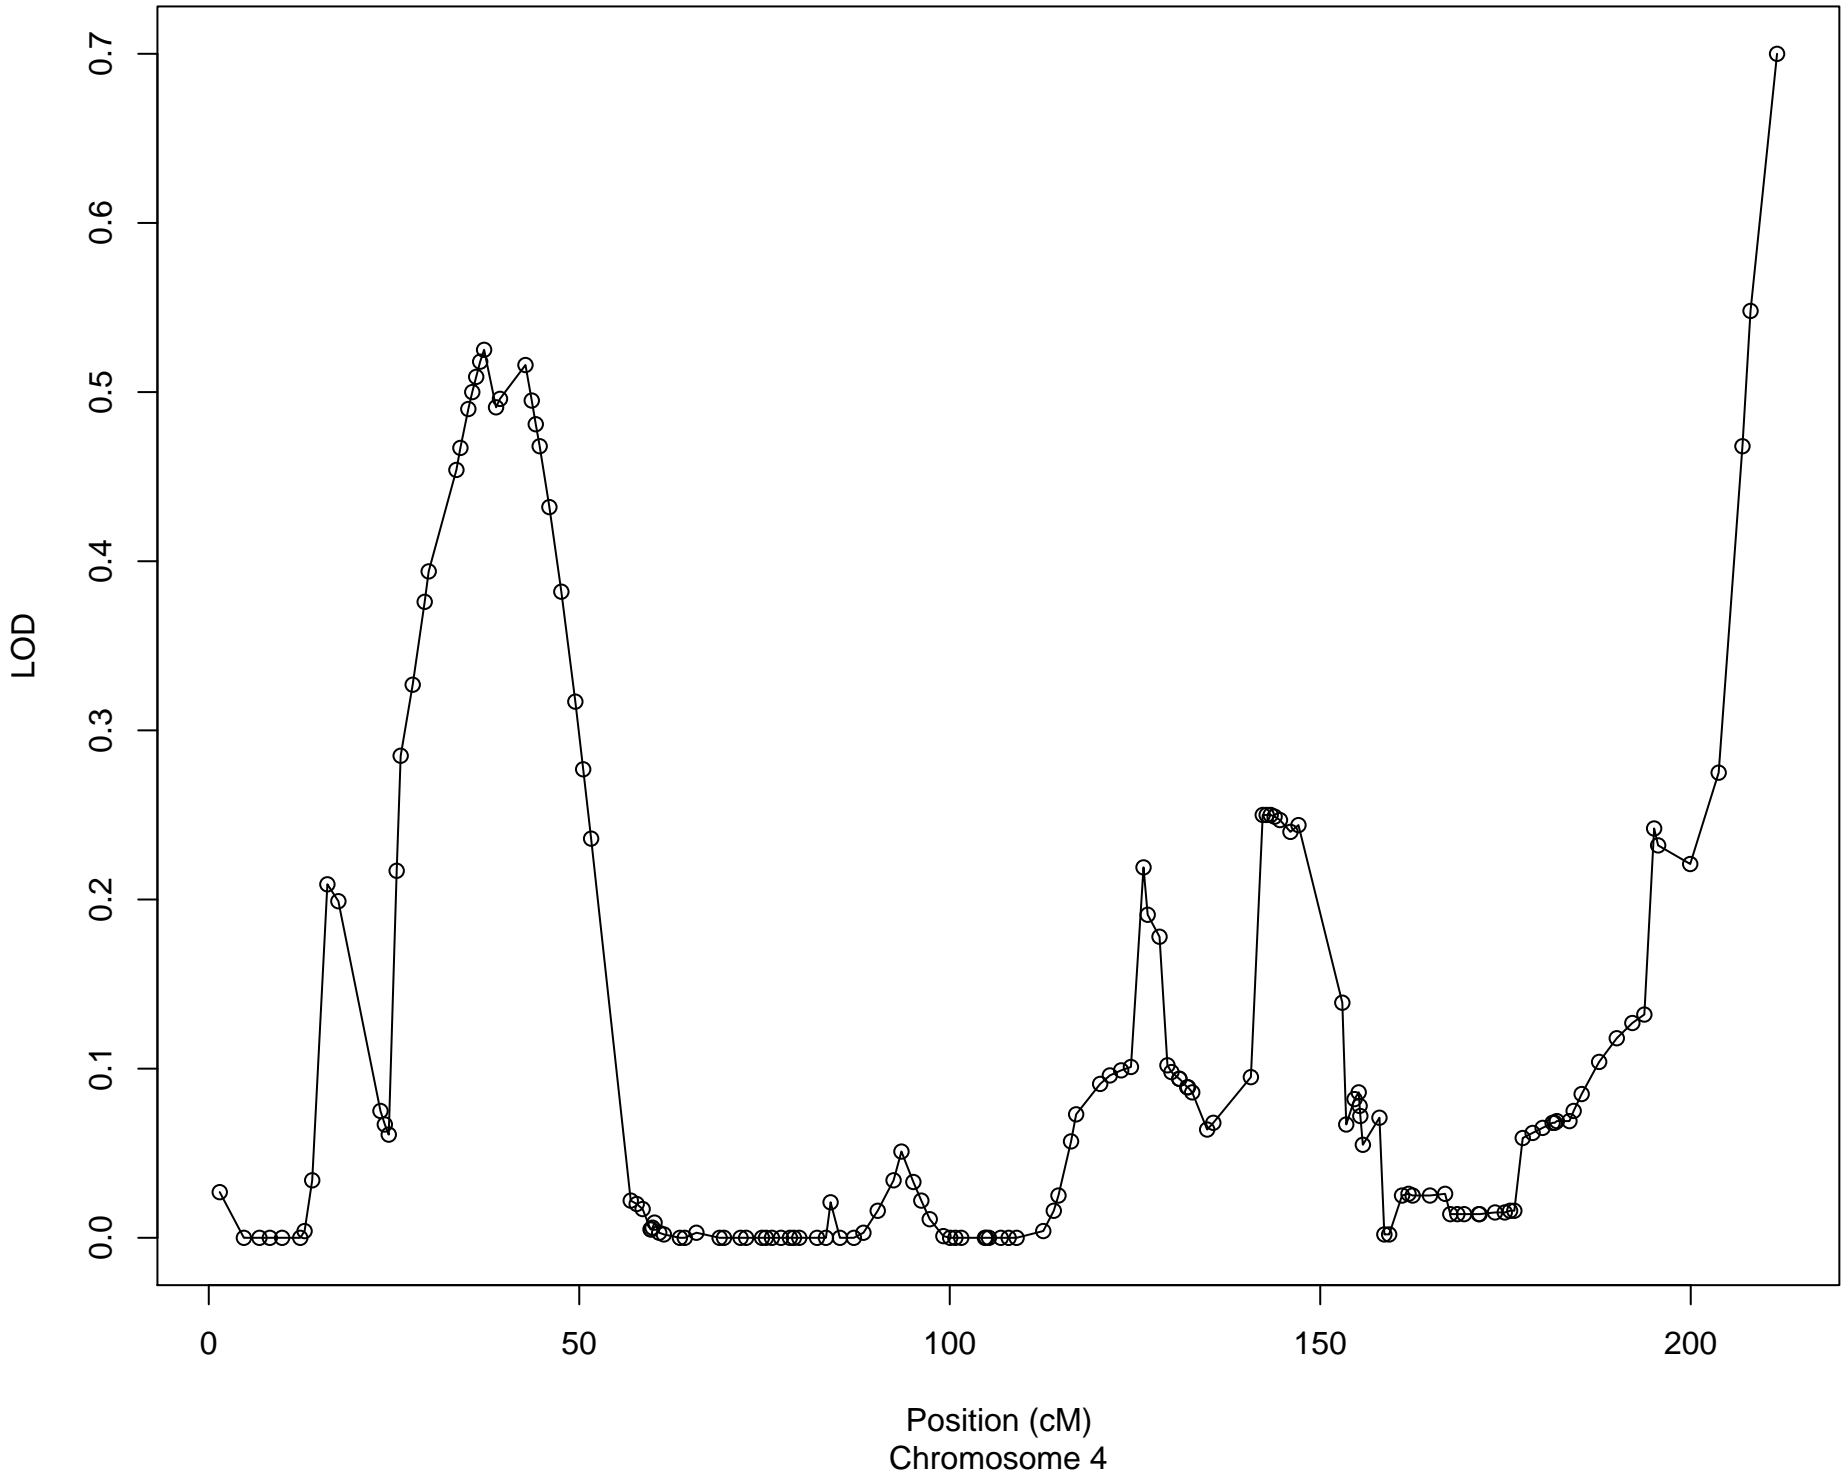

# Growth (1) (GR\_1)

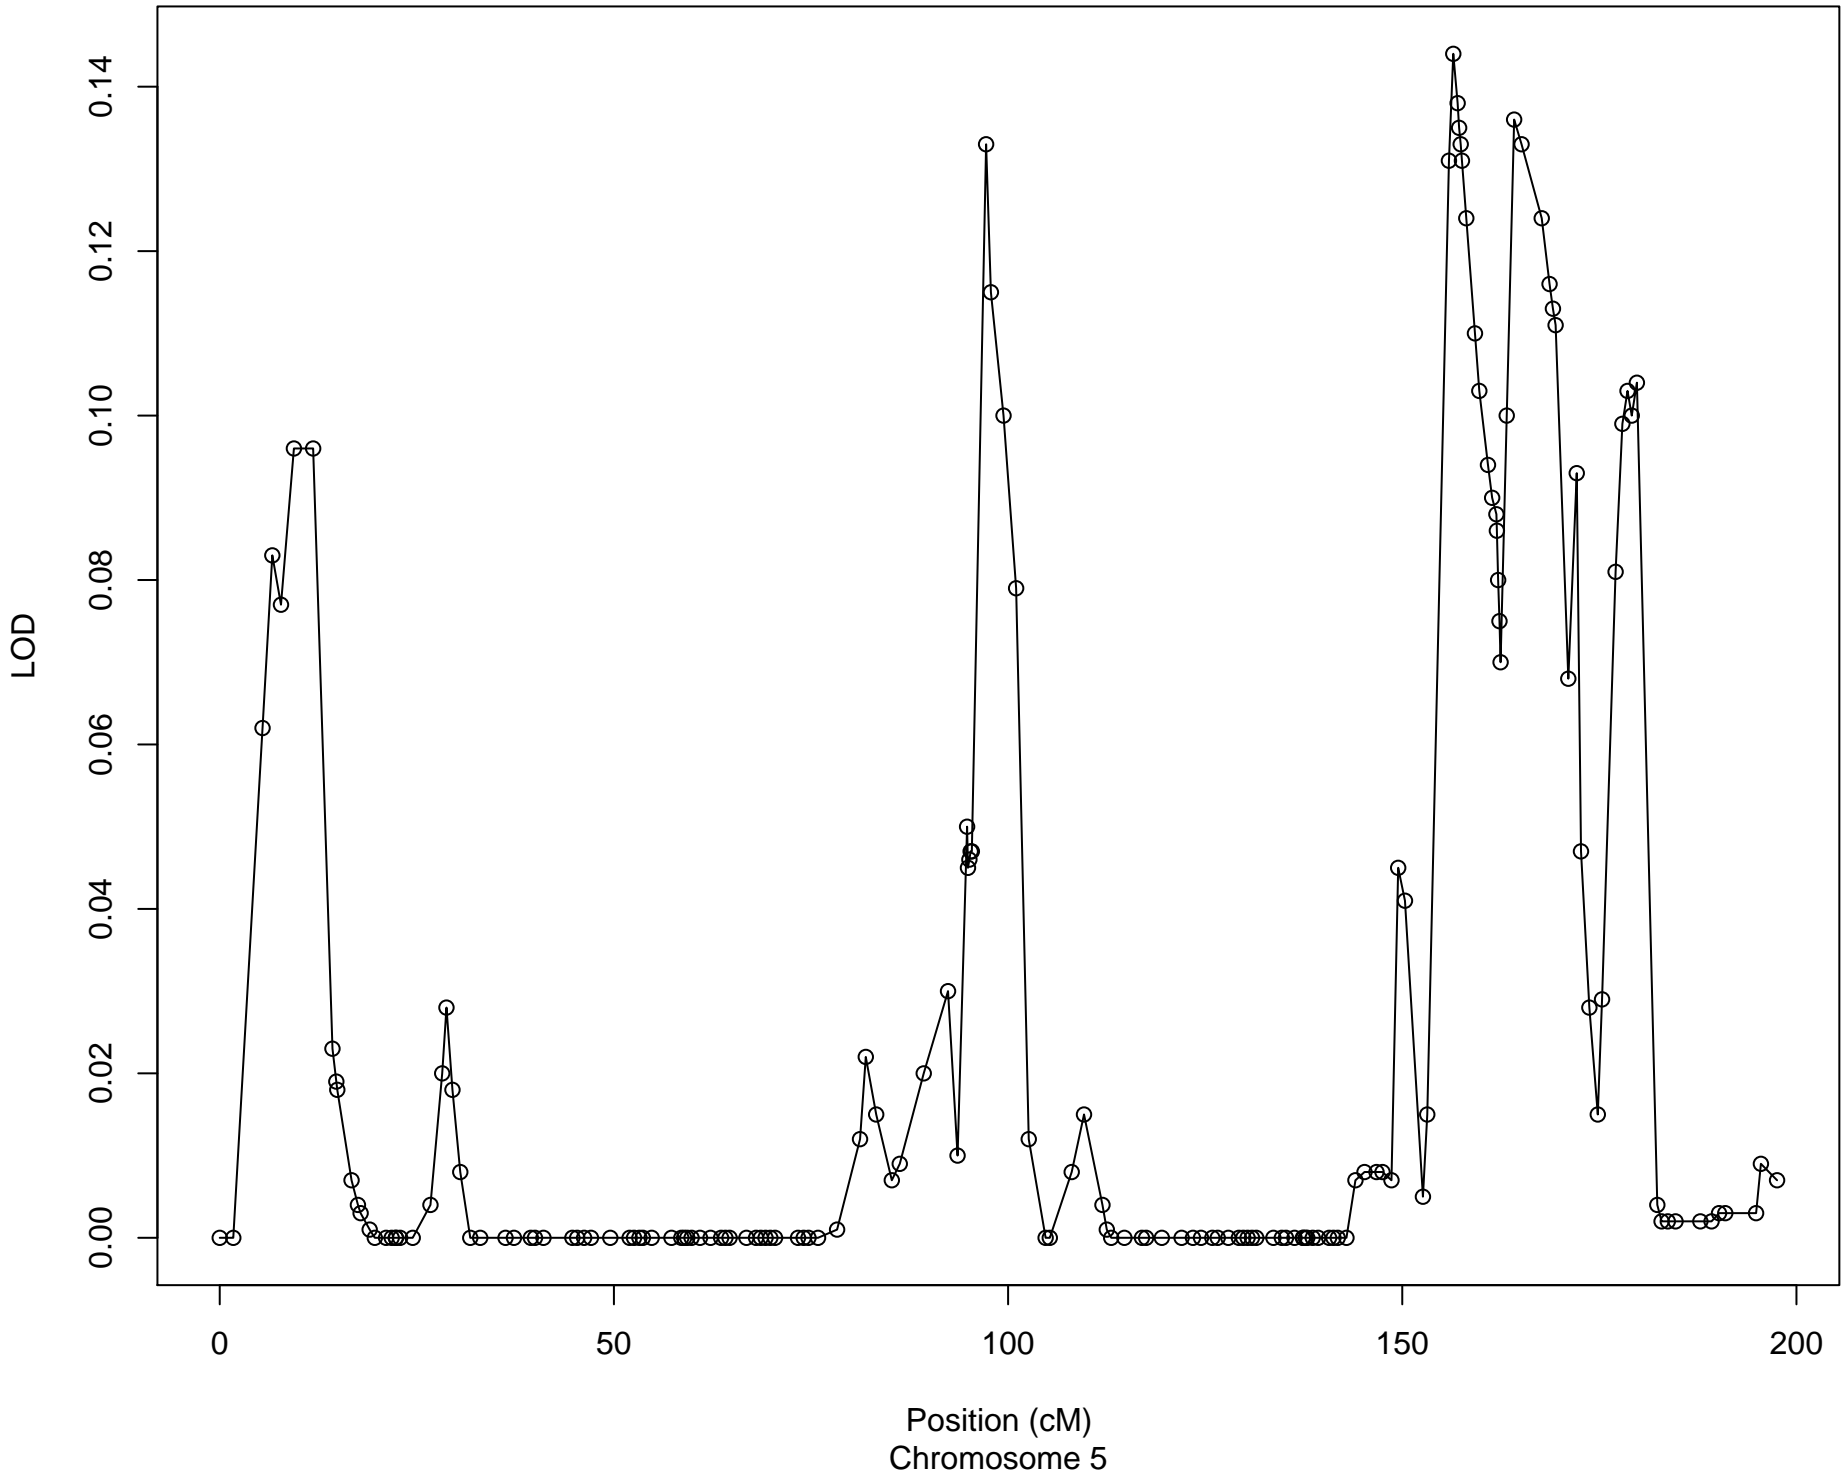

# Growth (1) (GR\_1)

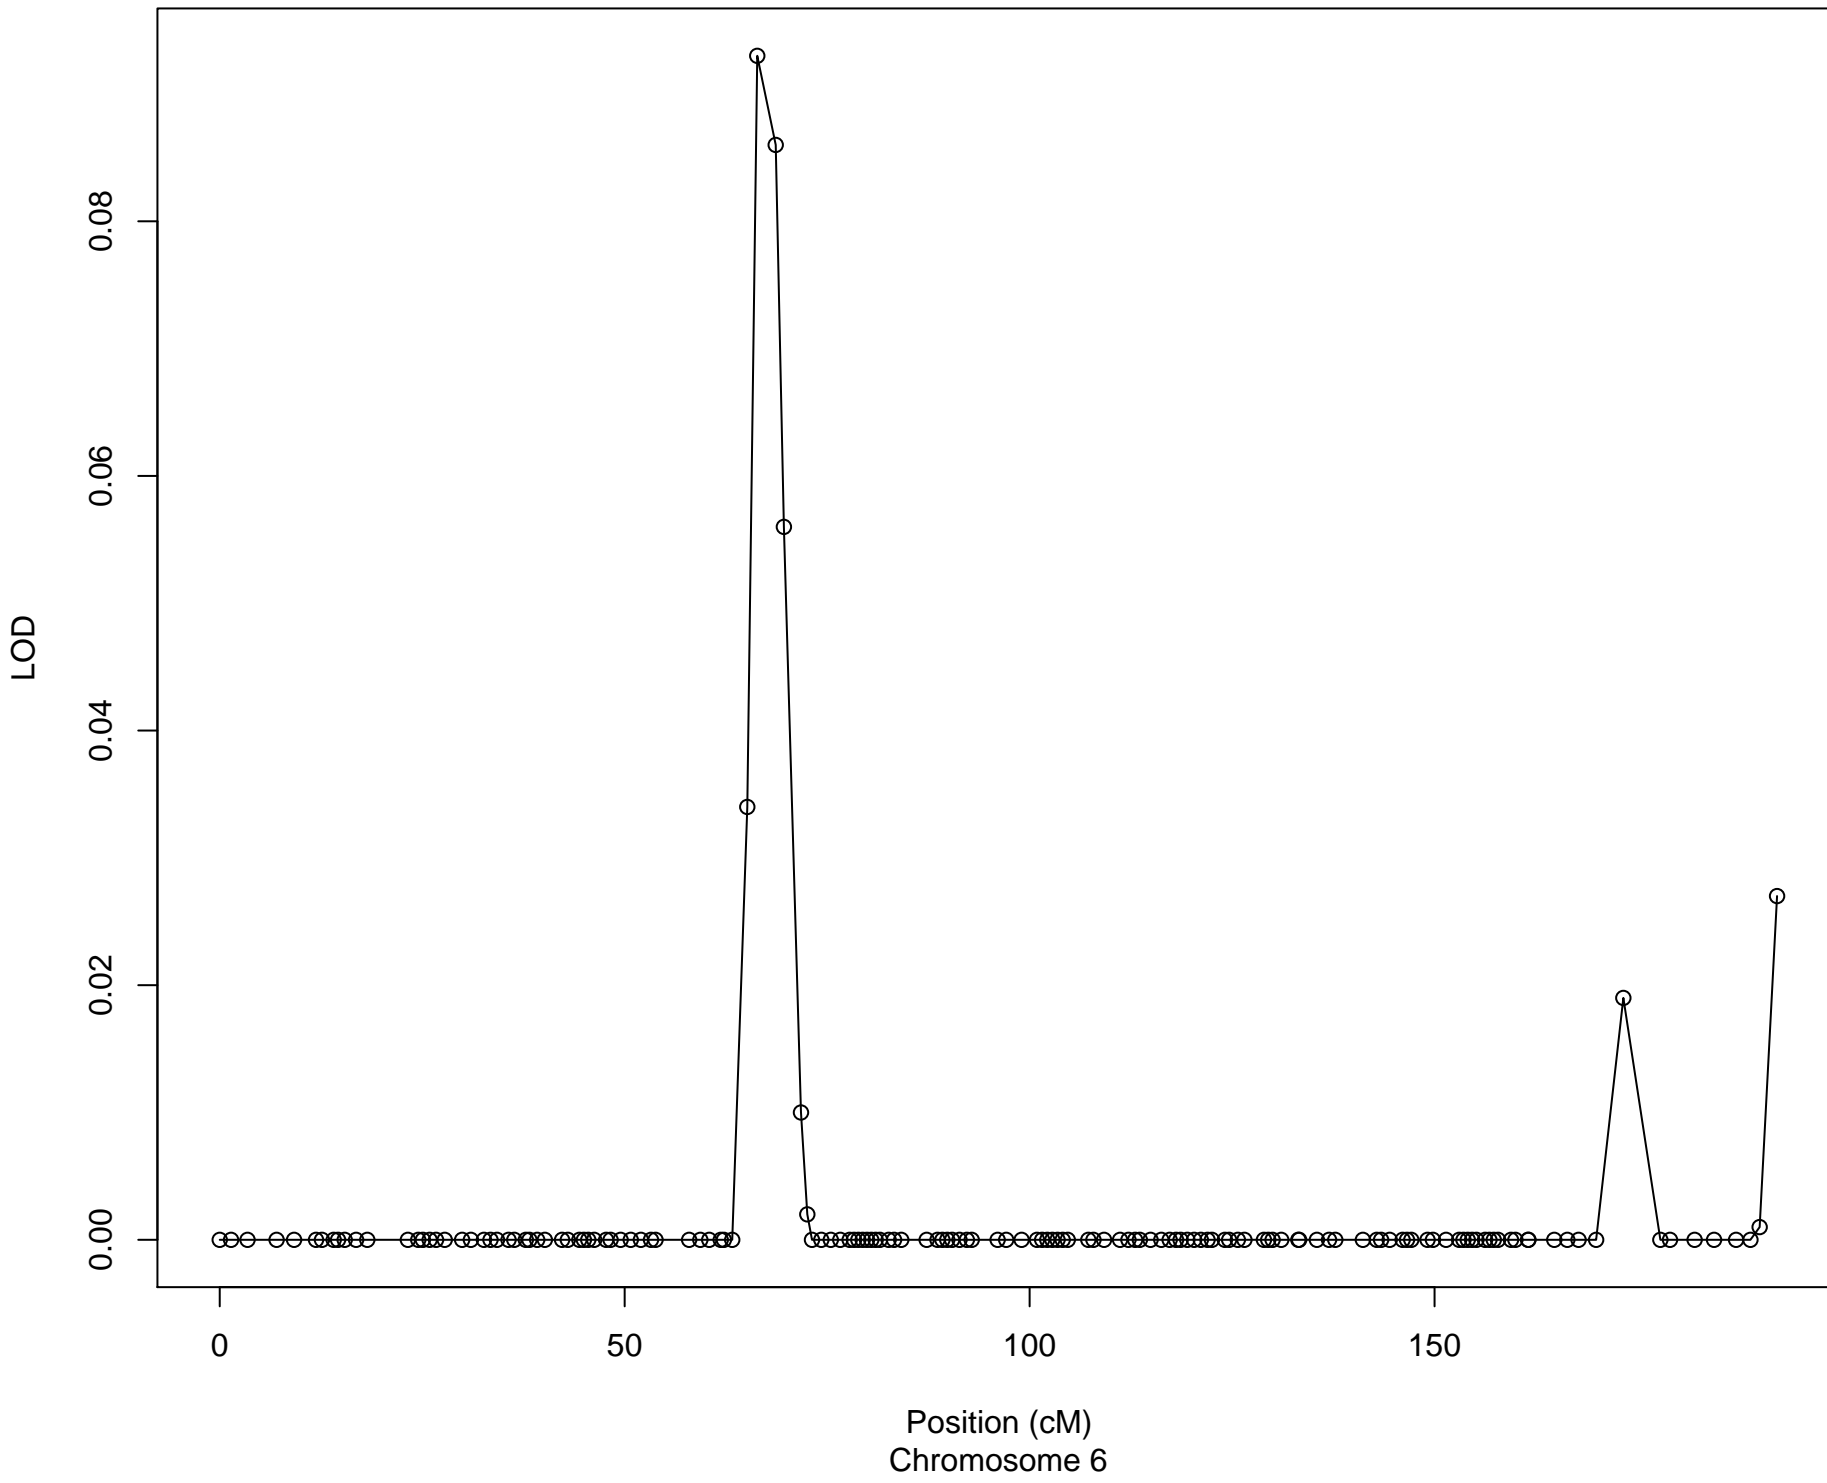

# Growth (1) (GR\_1)

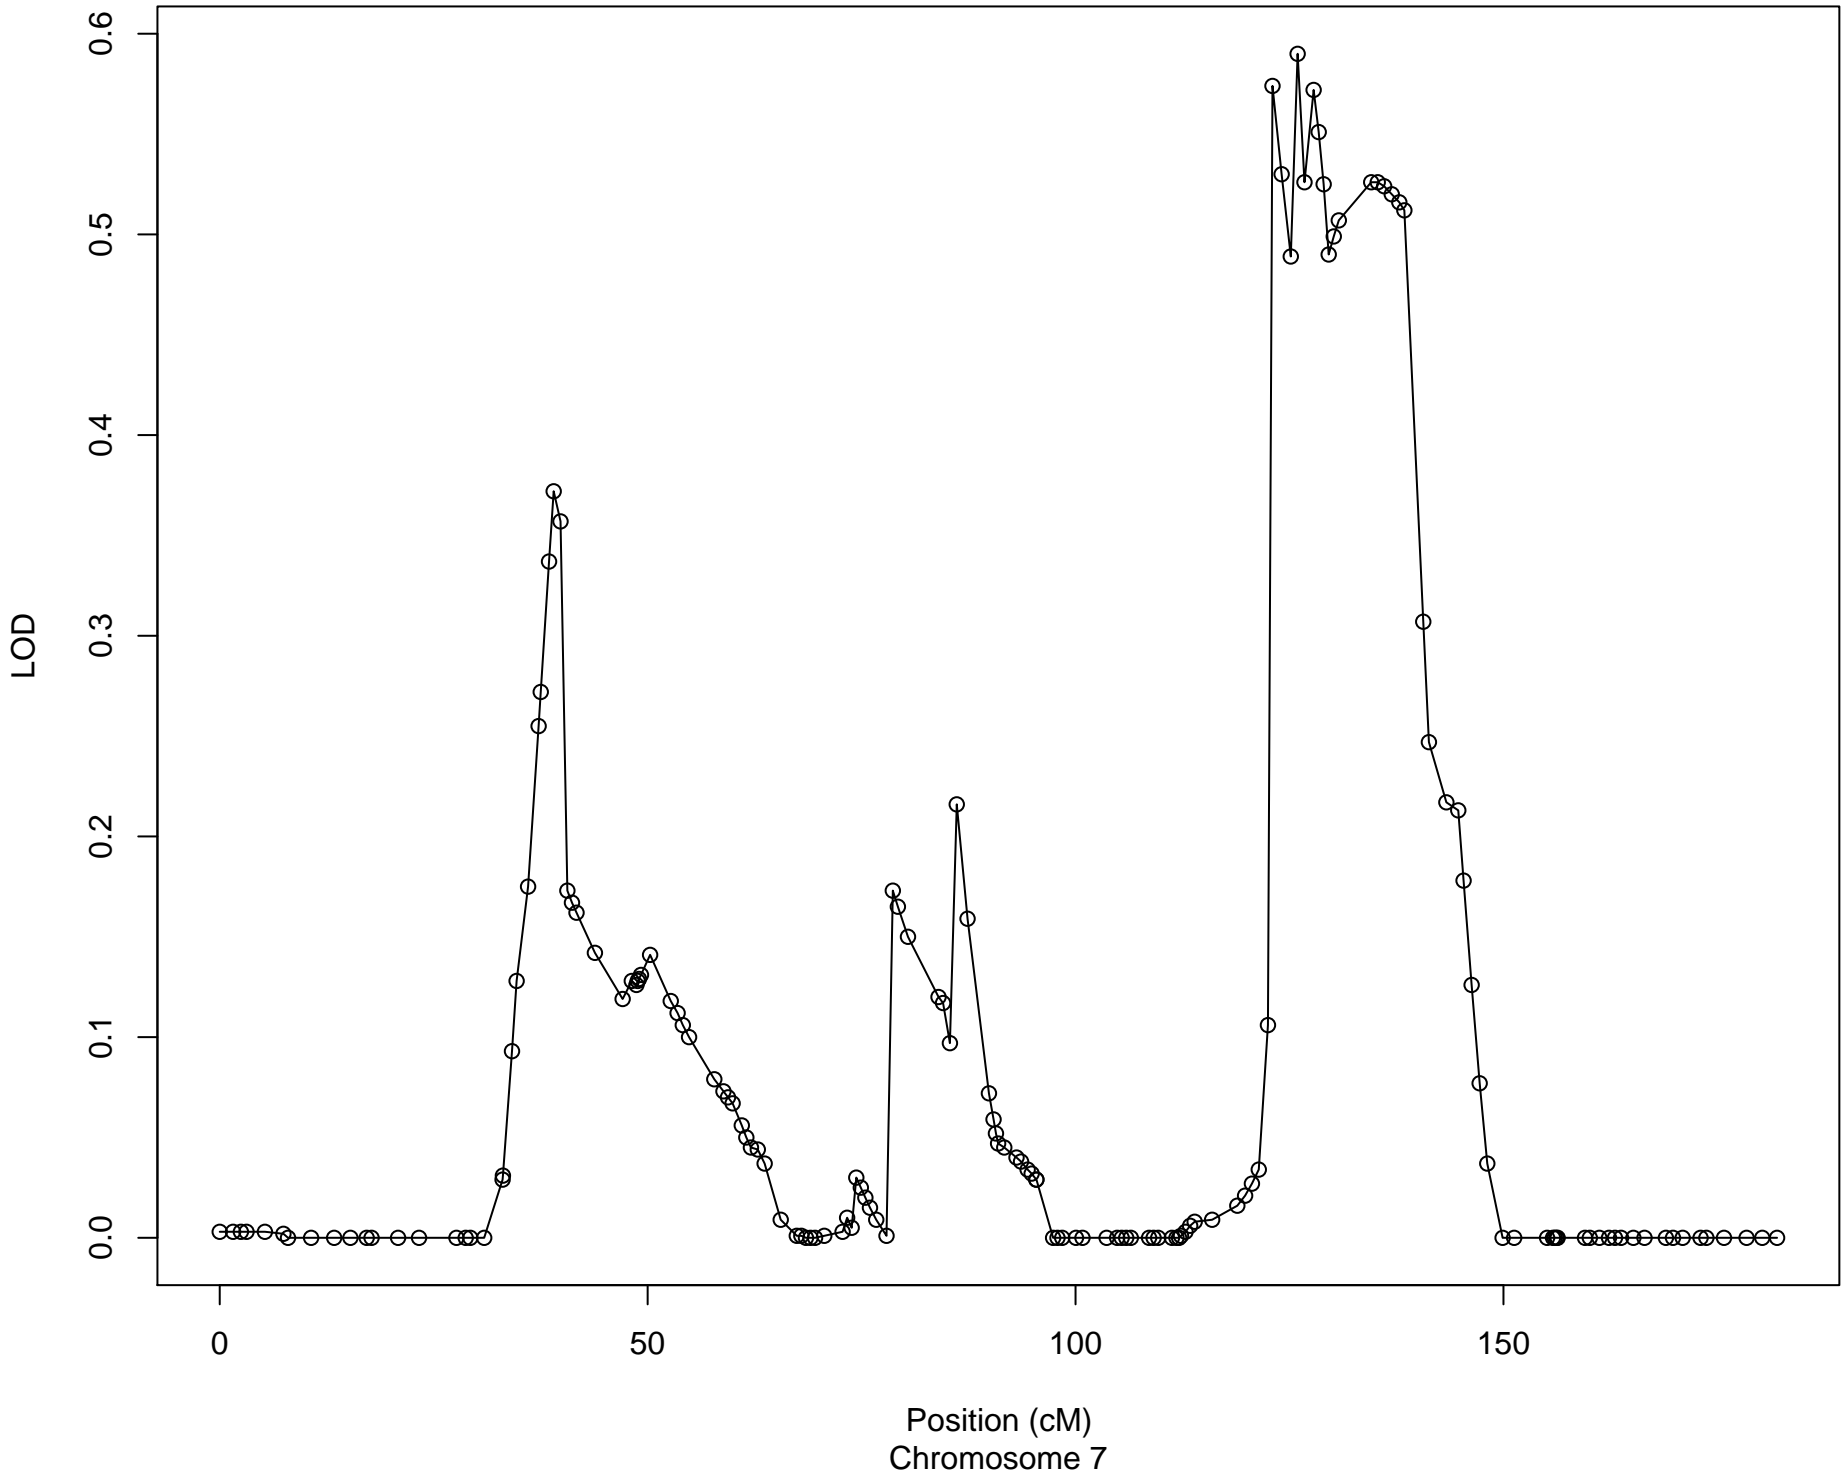

# Growth (1) (GR\_1)

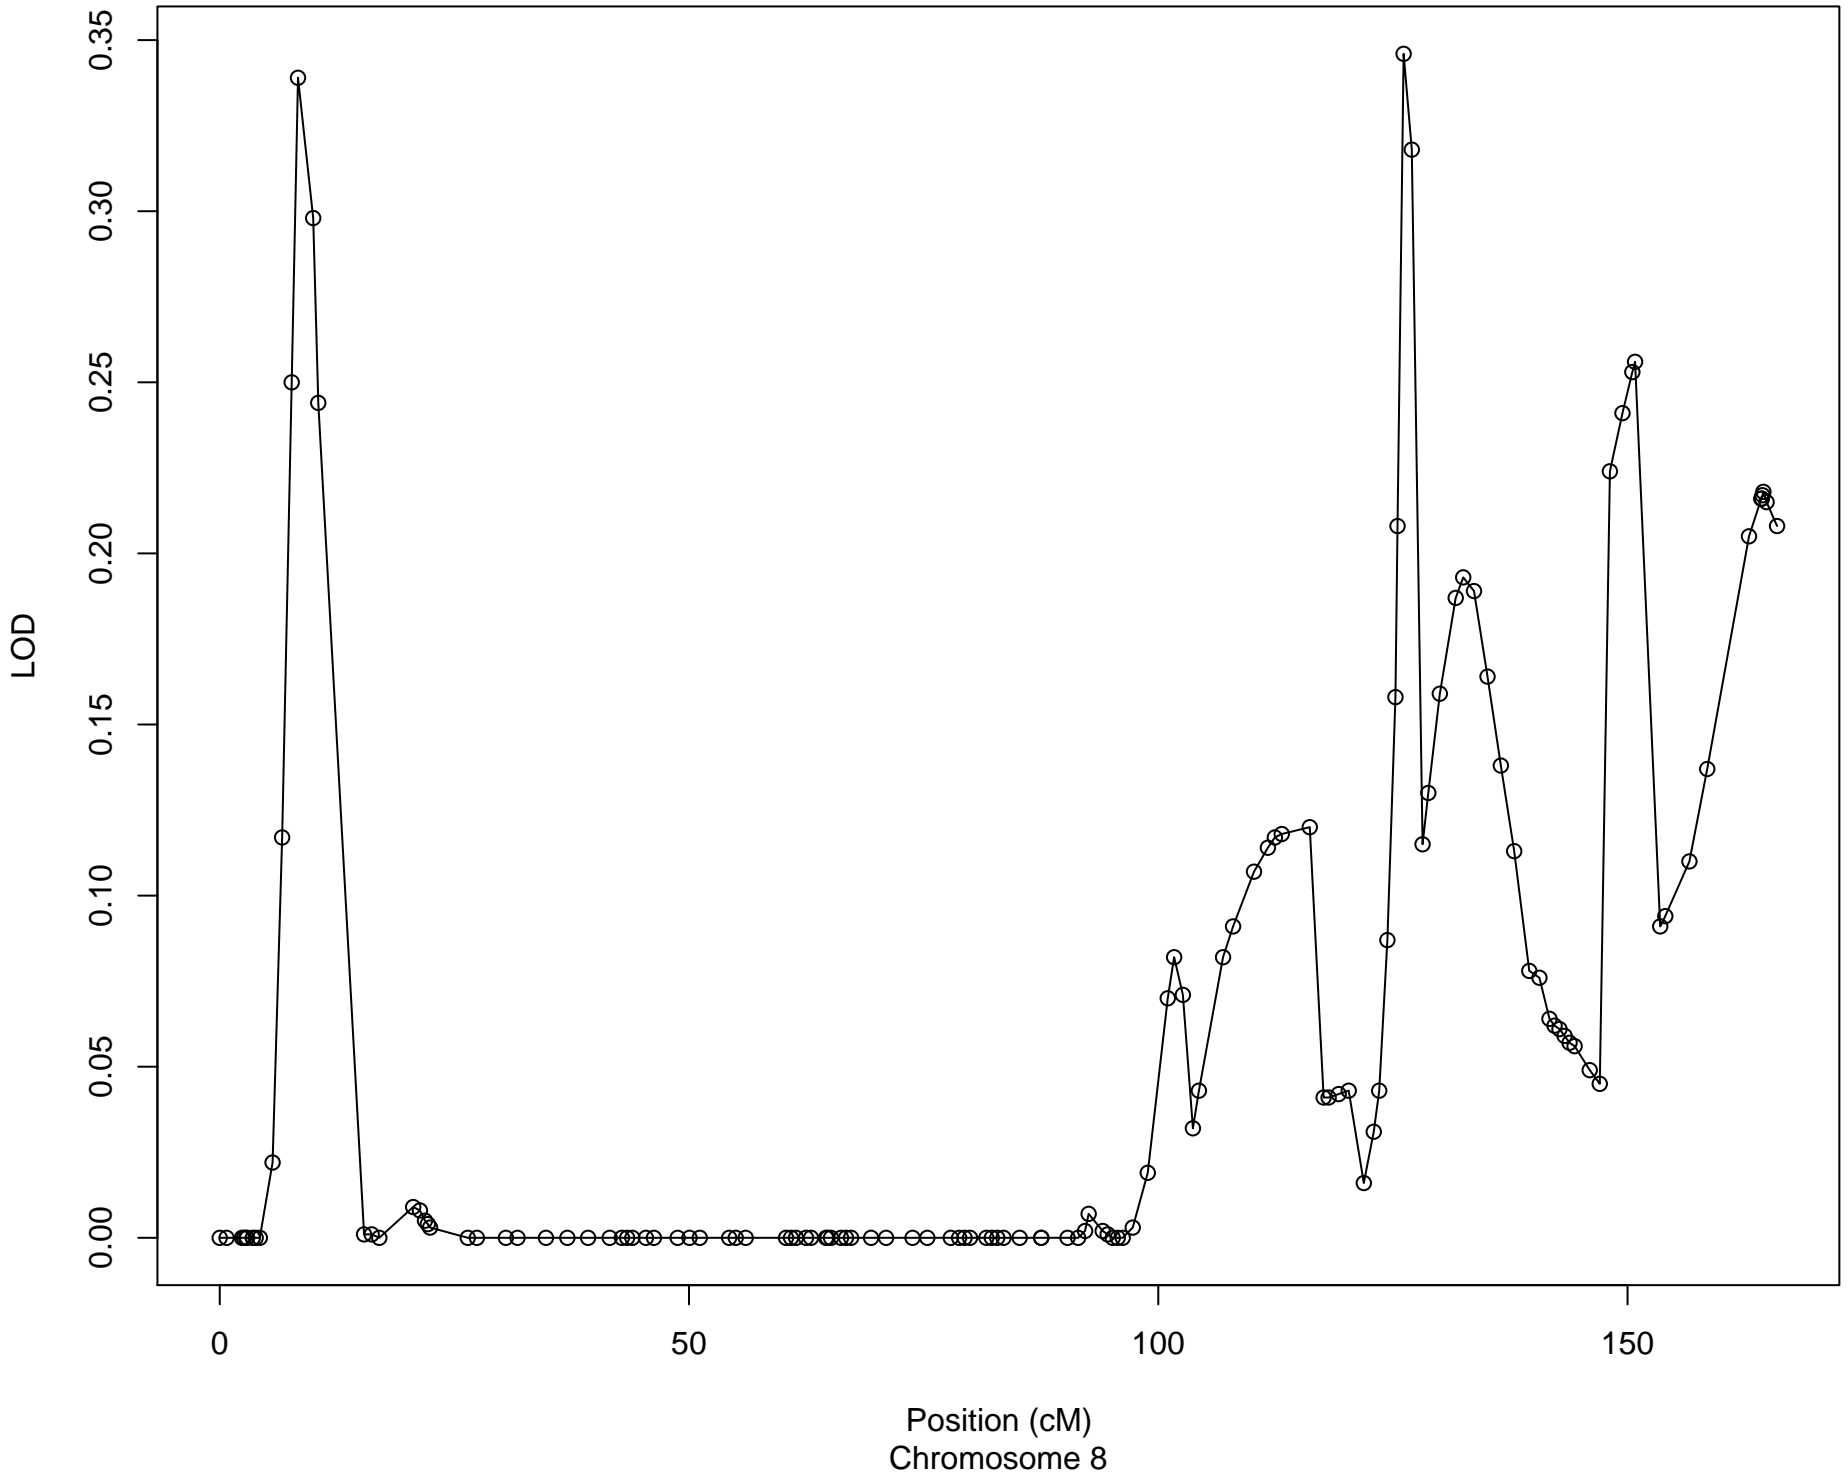

# Growth (1) (GR\_1)

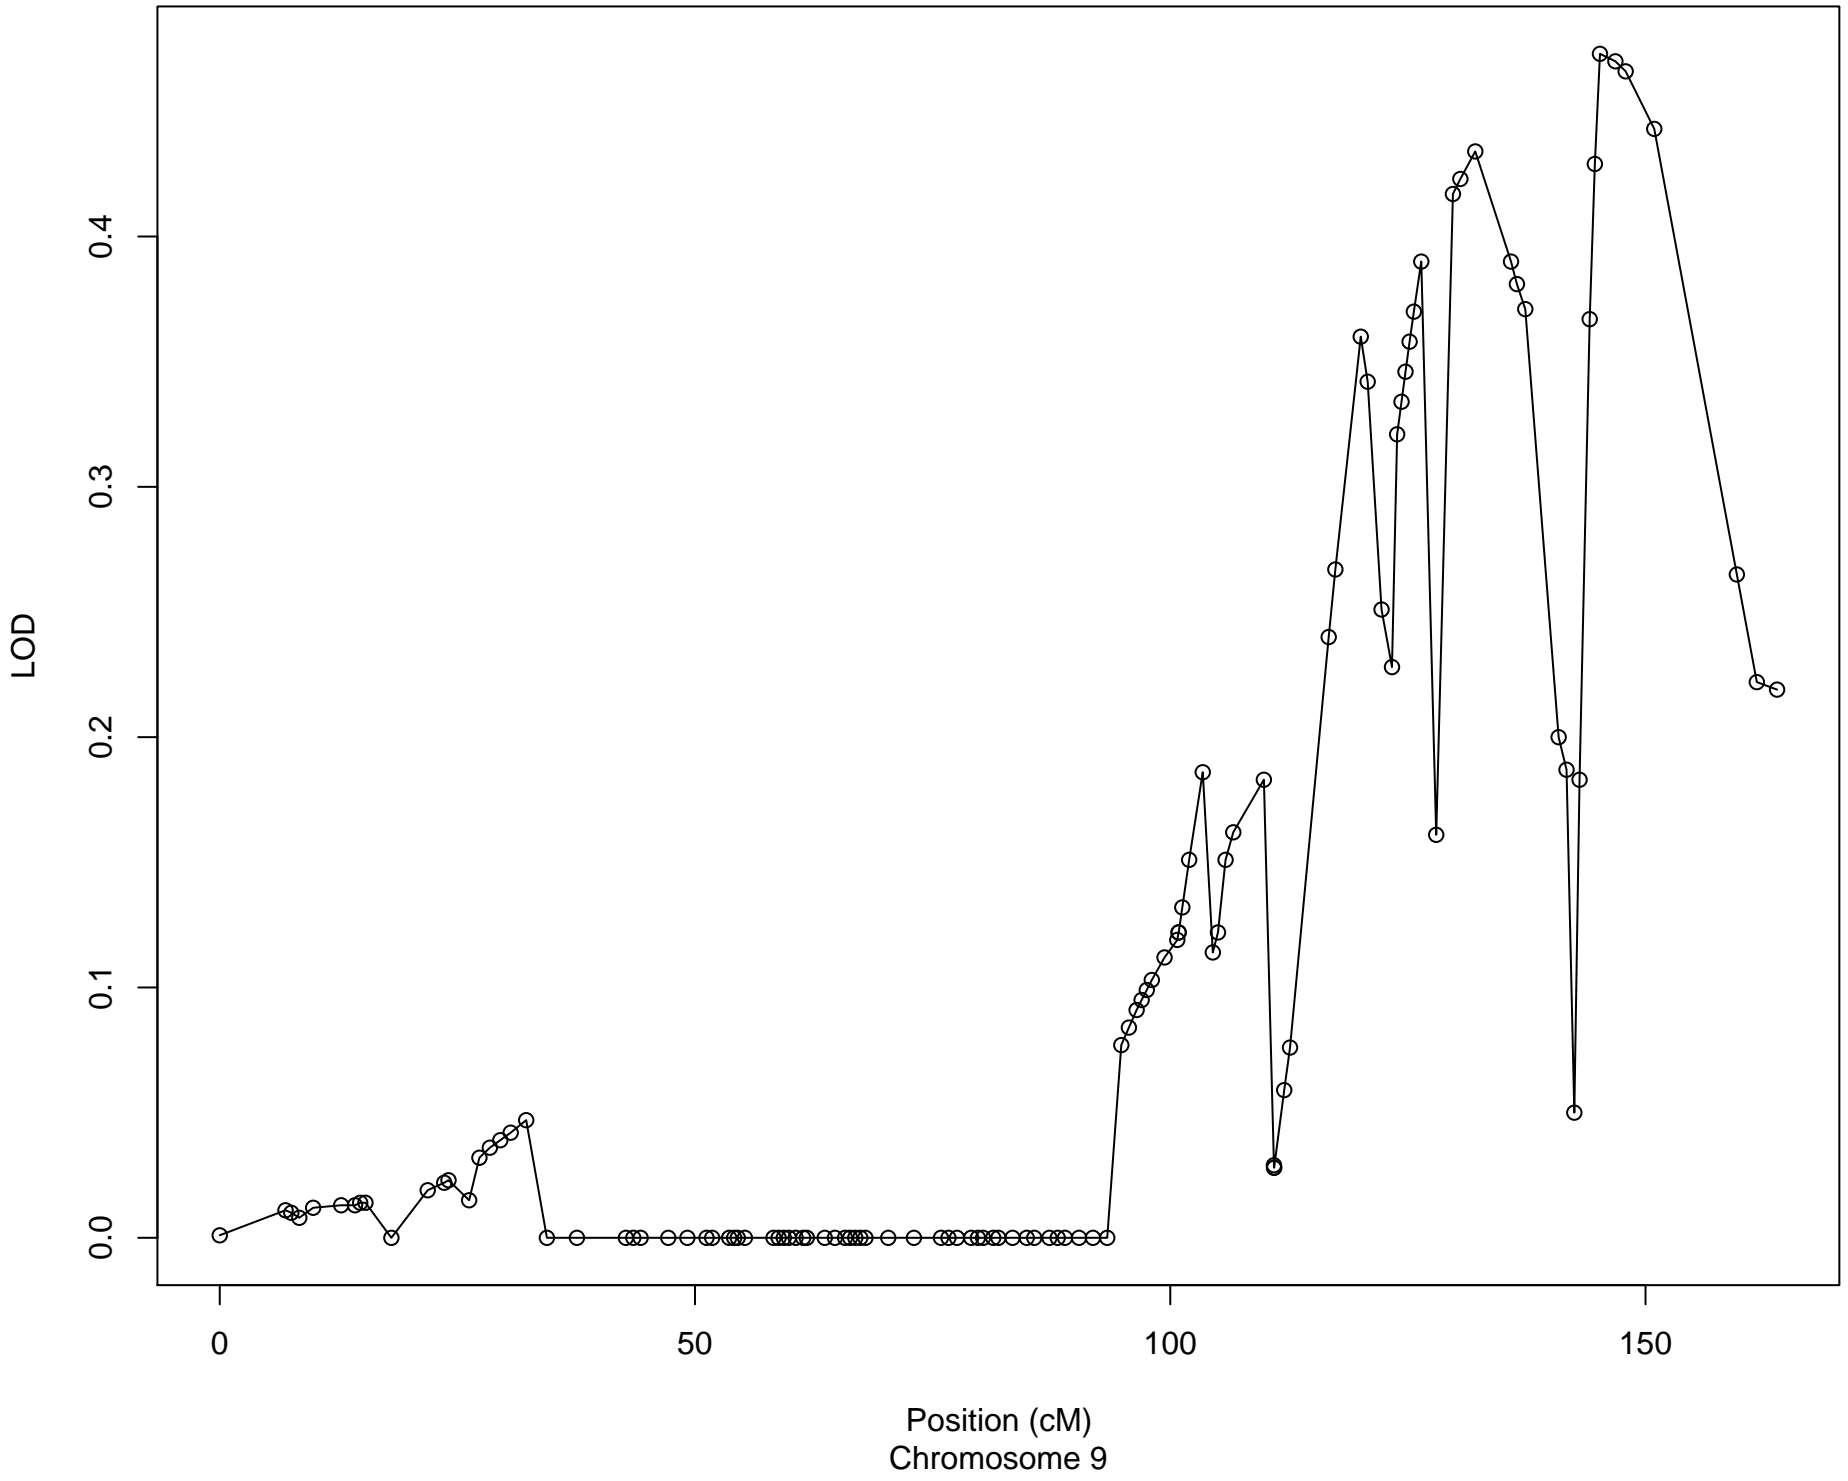

# Growth (1) (GR\_1)

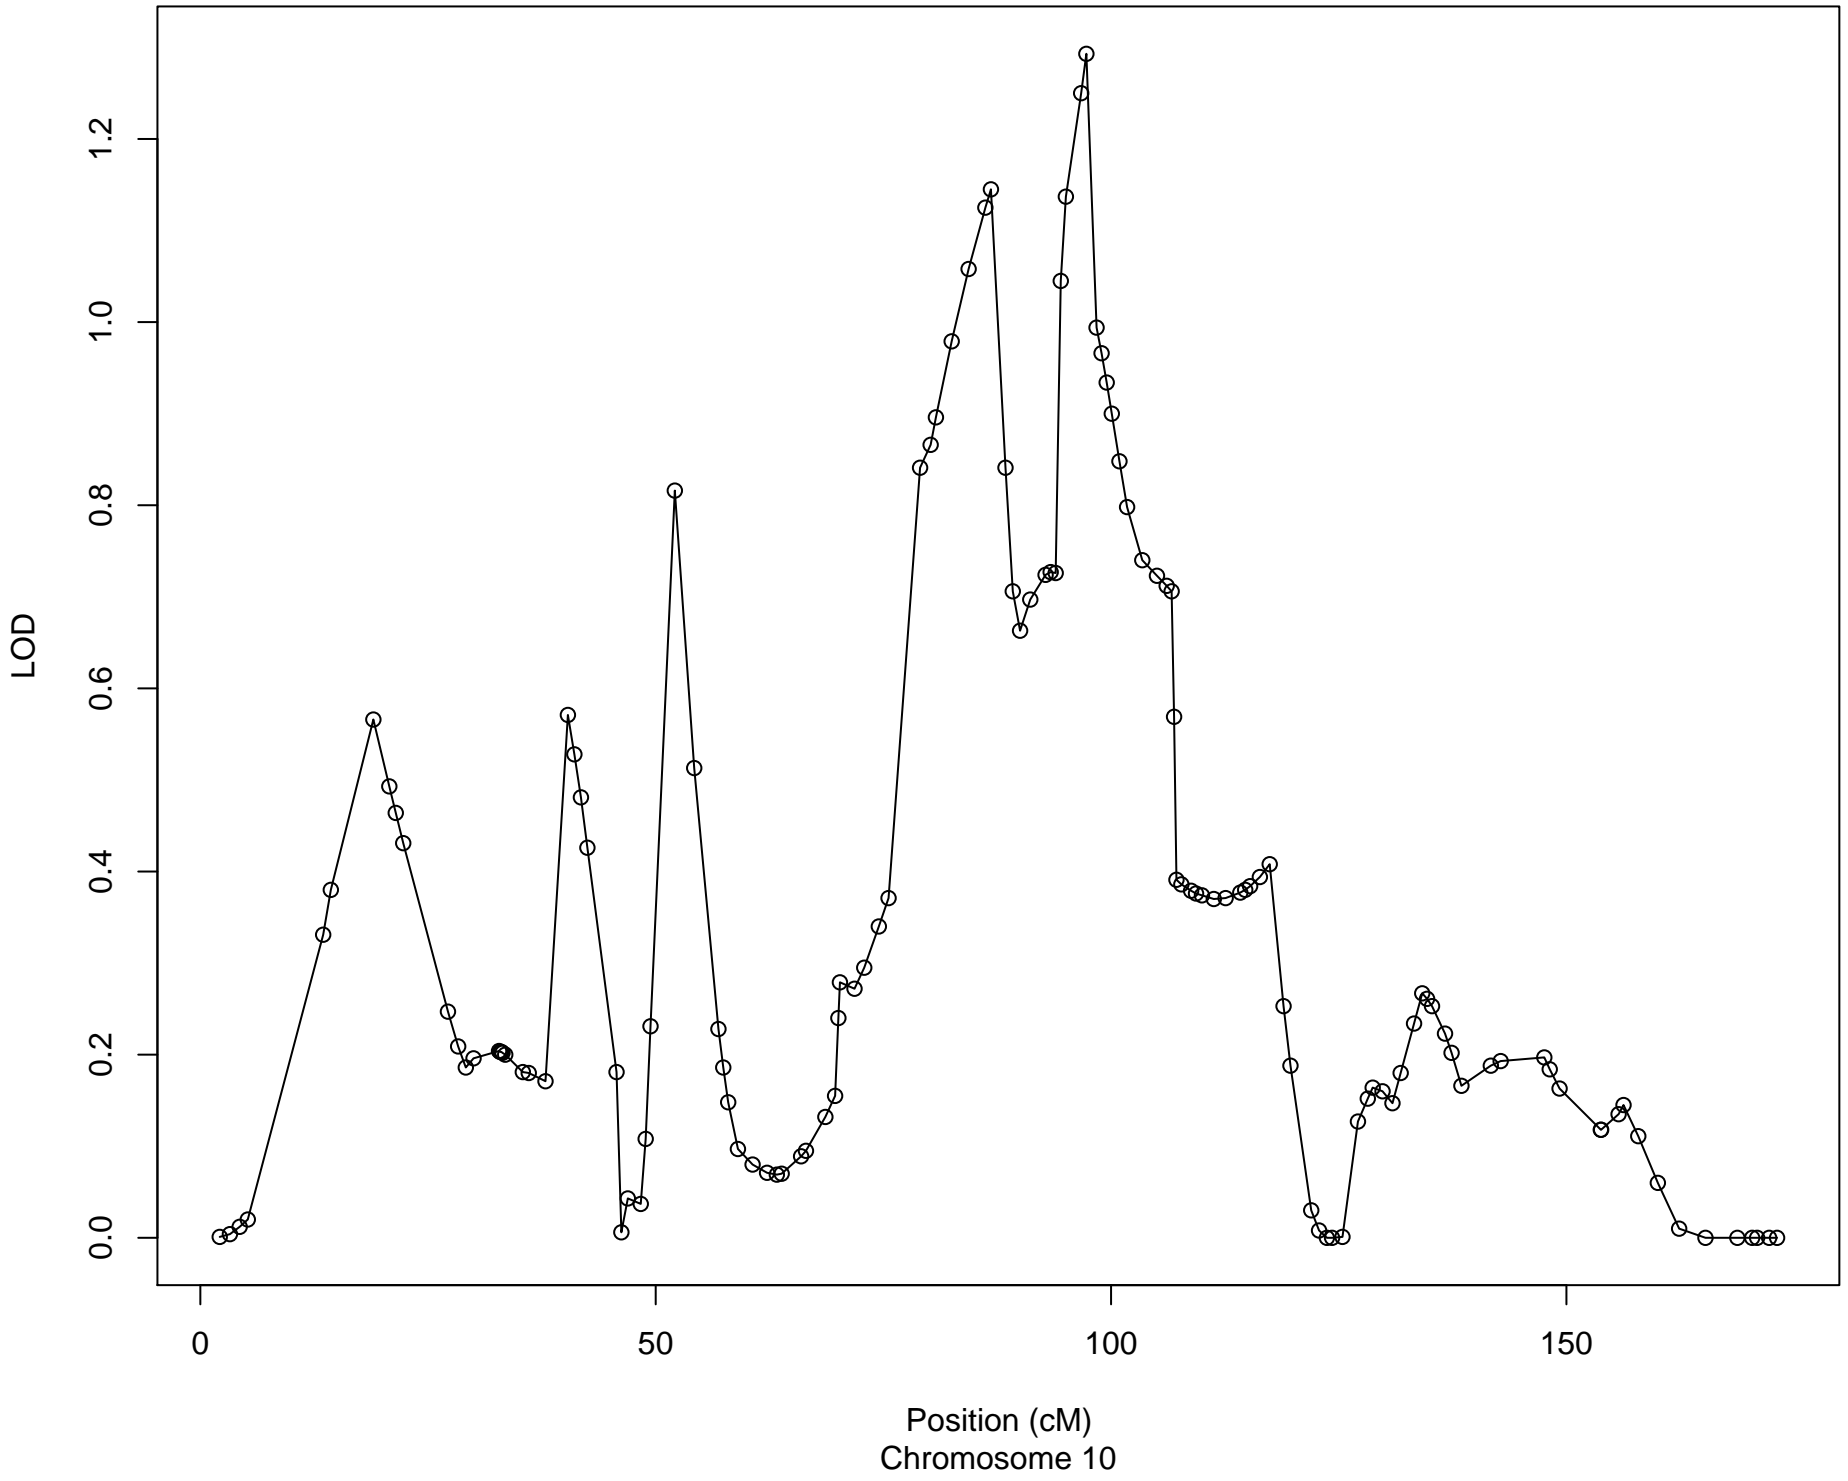



# Growth (1) (GR\_1)

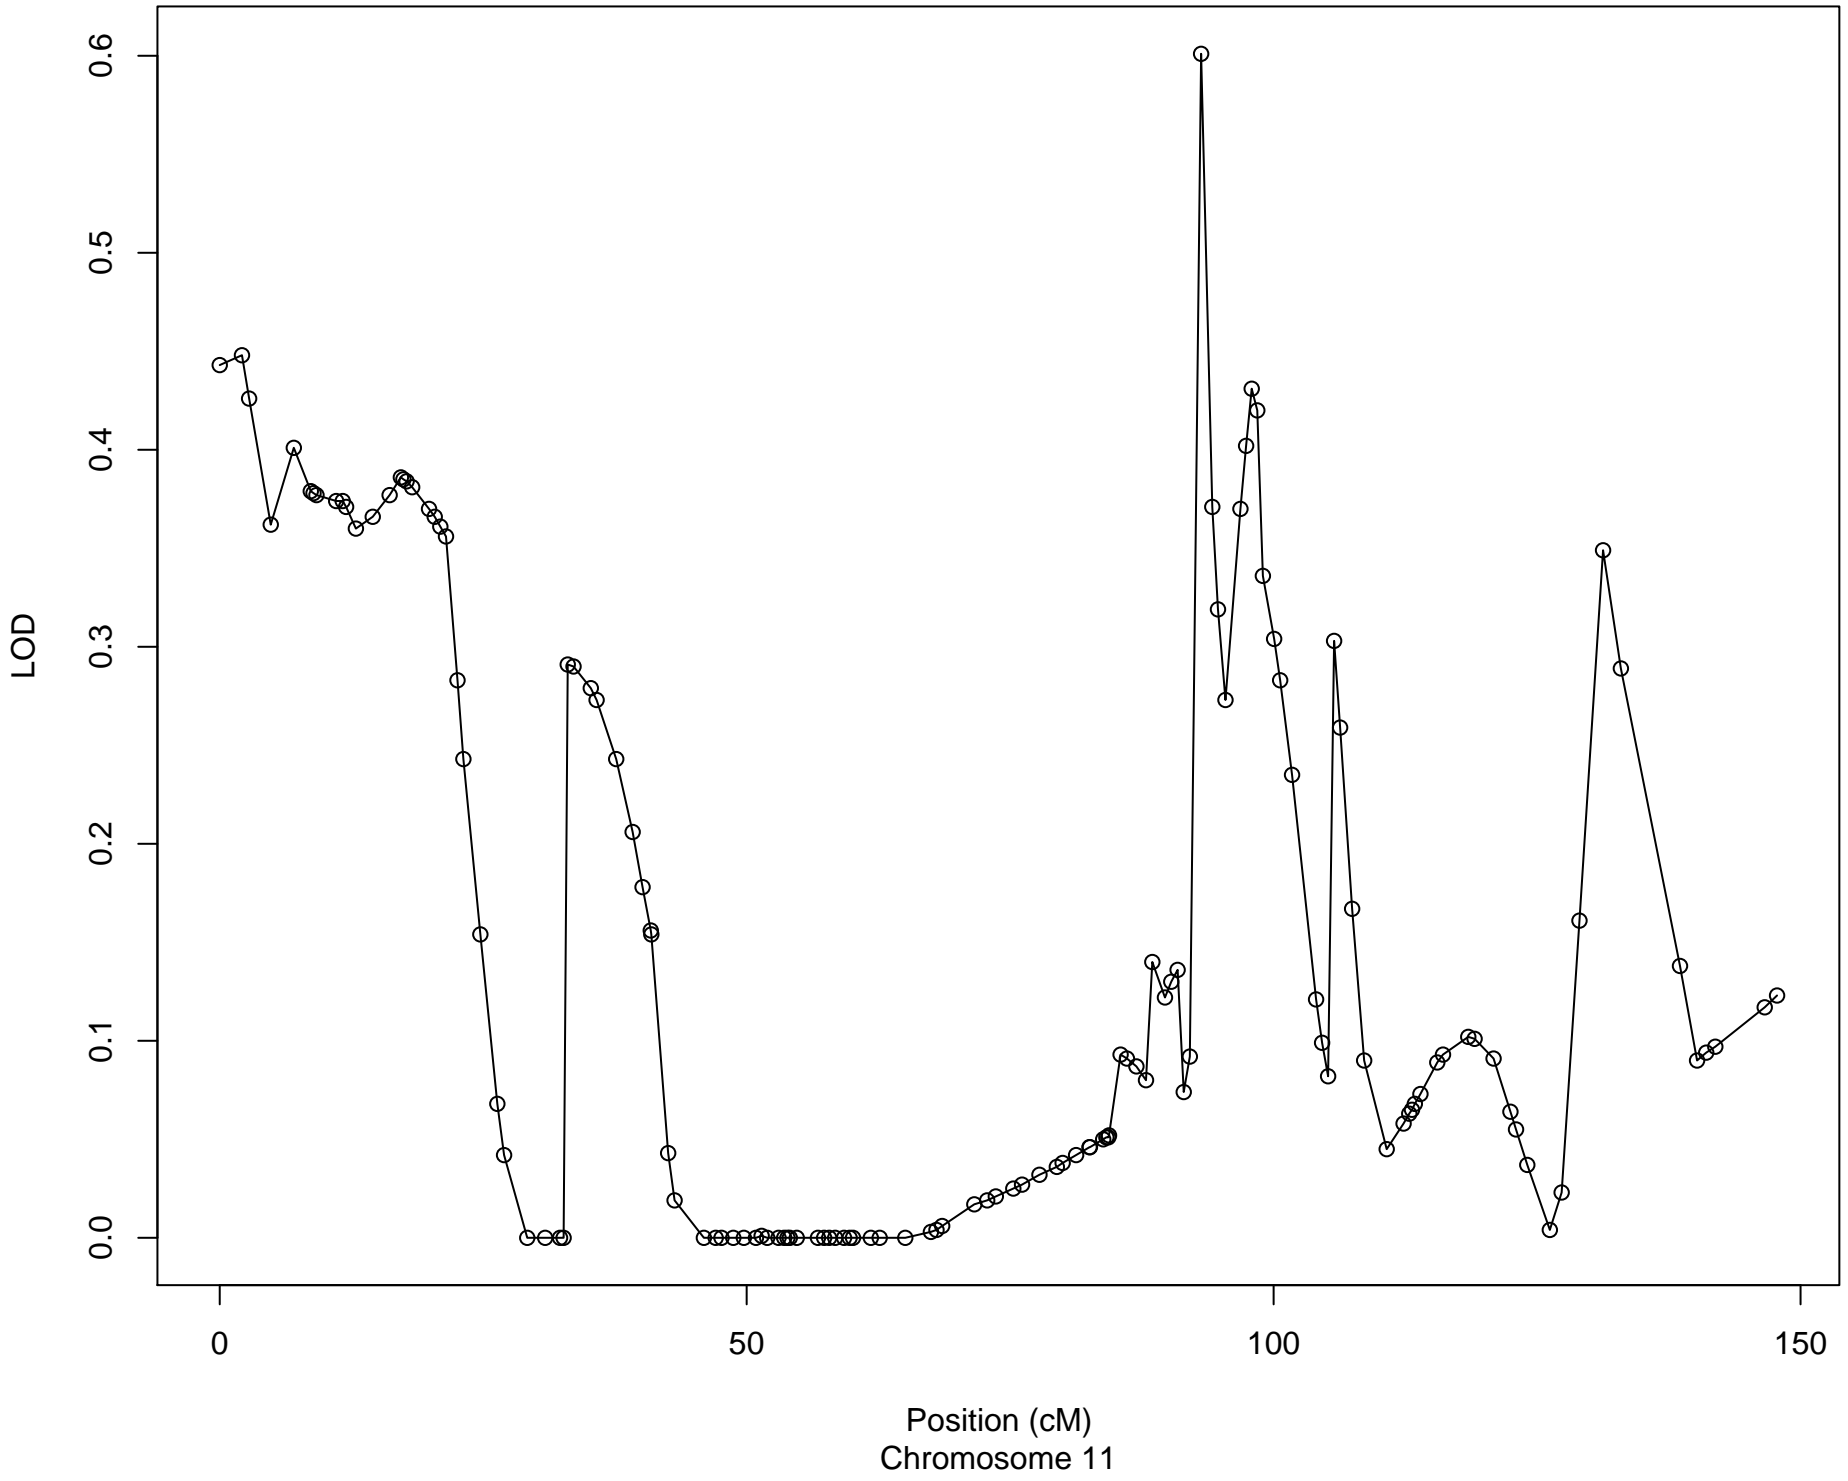

# Growth (1) (GR\_1)

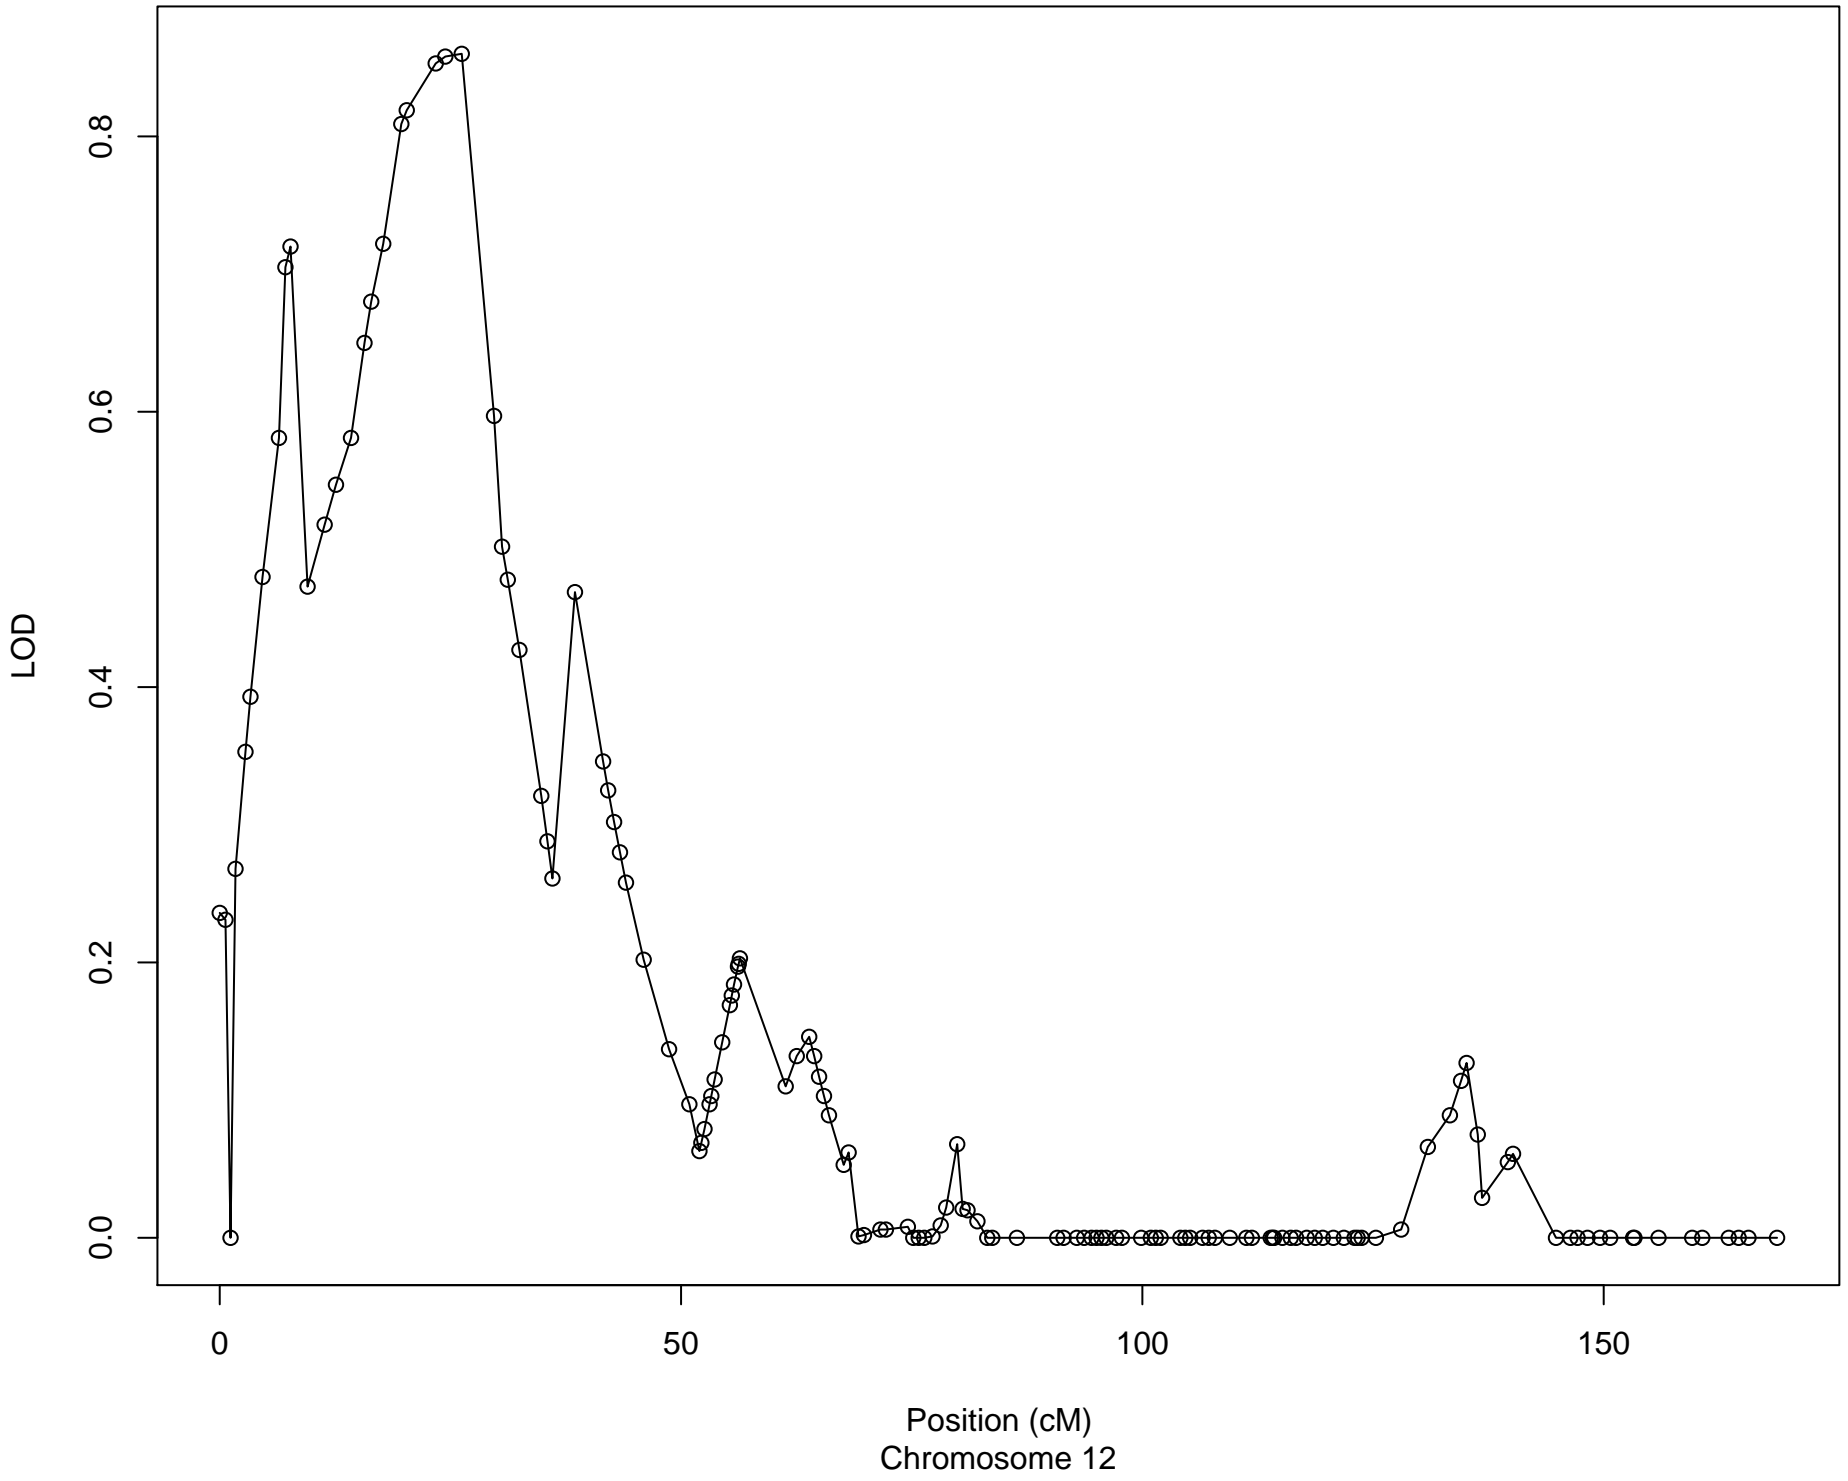

# Growth (1) (GR\_1)

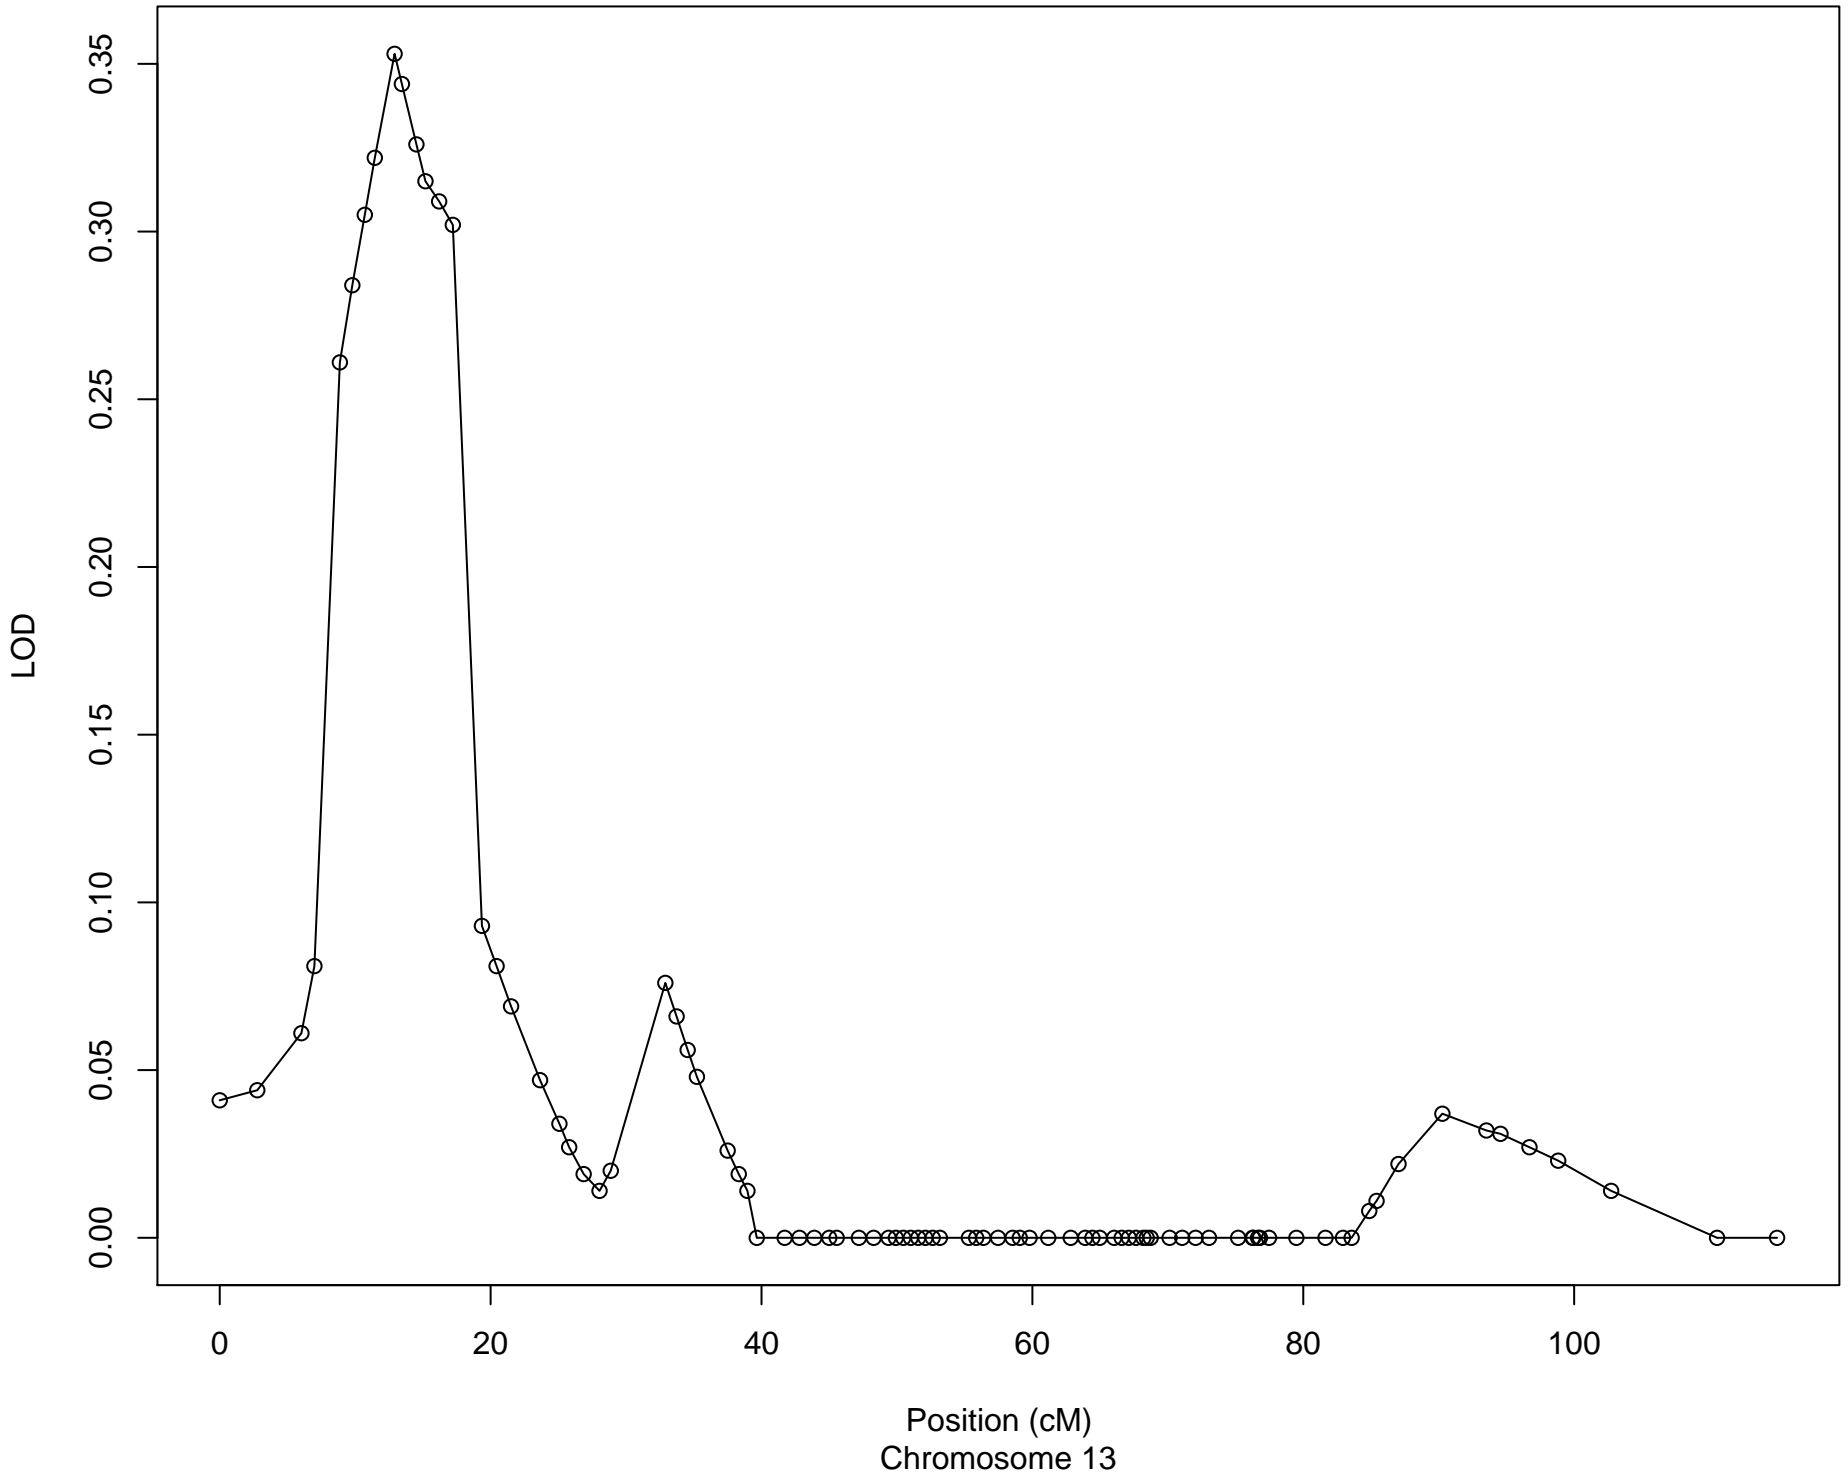

# Growth (1) (GR\_1)

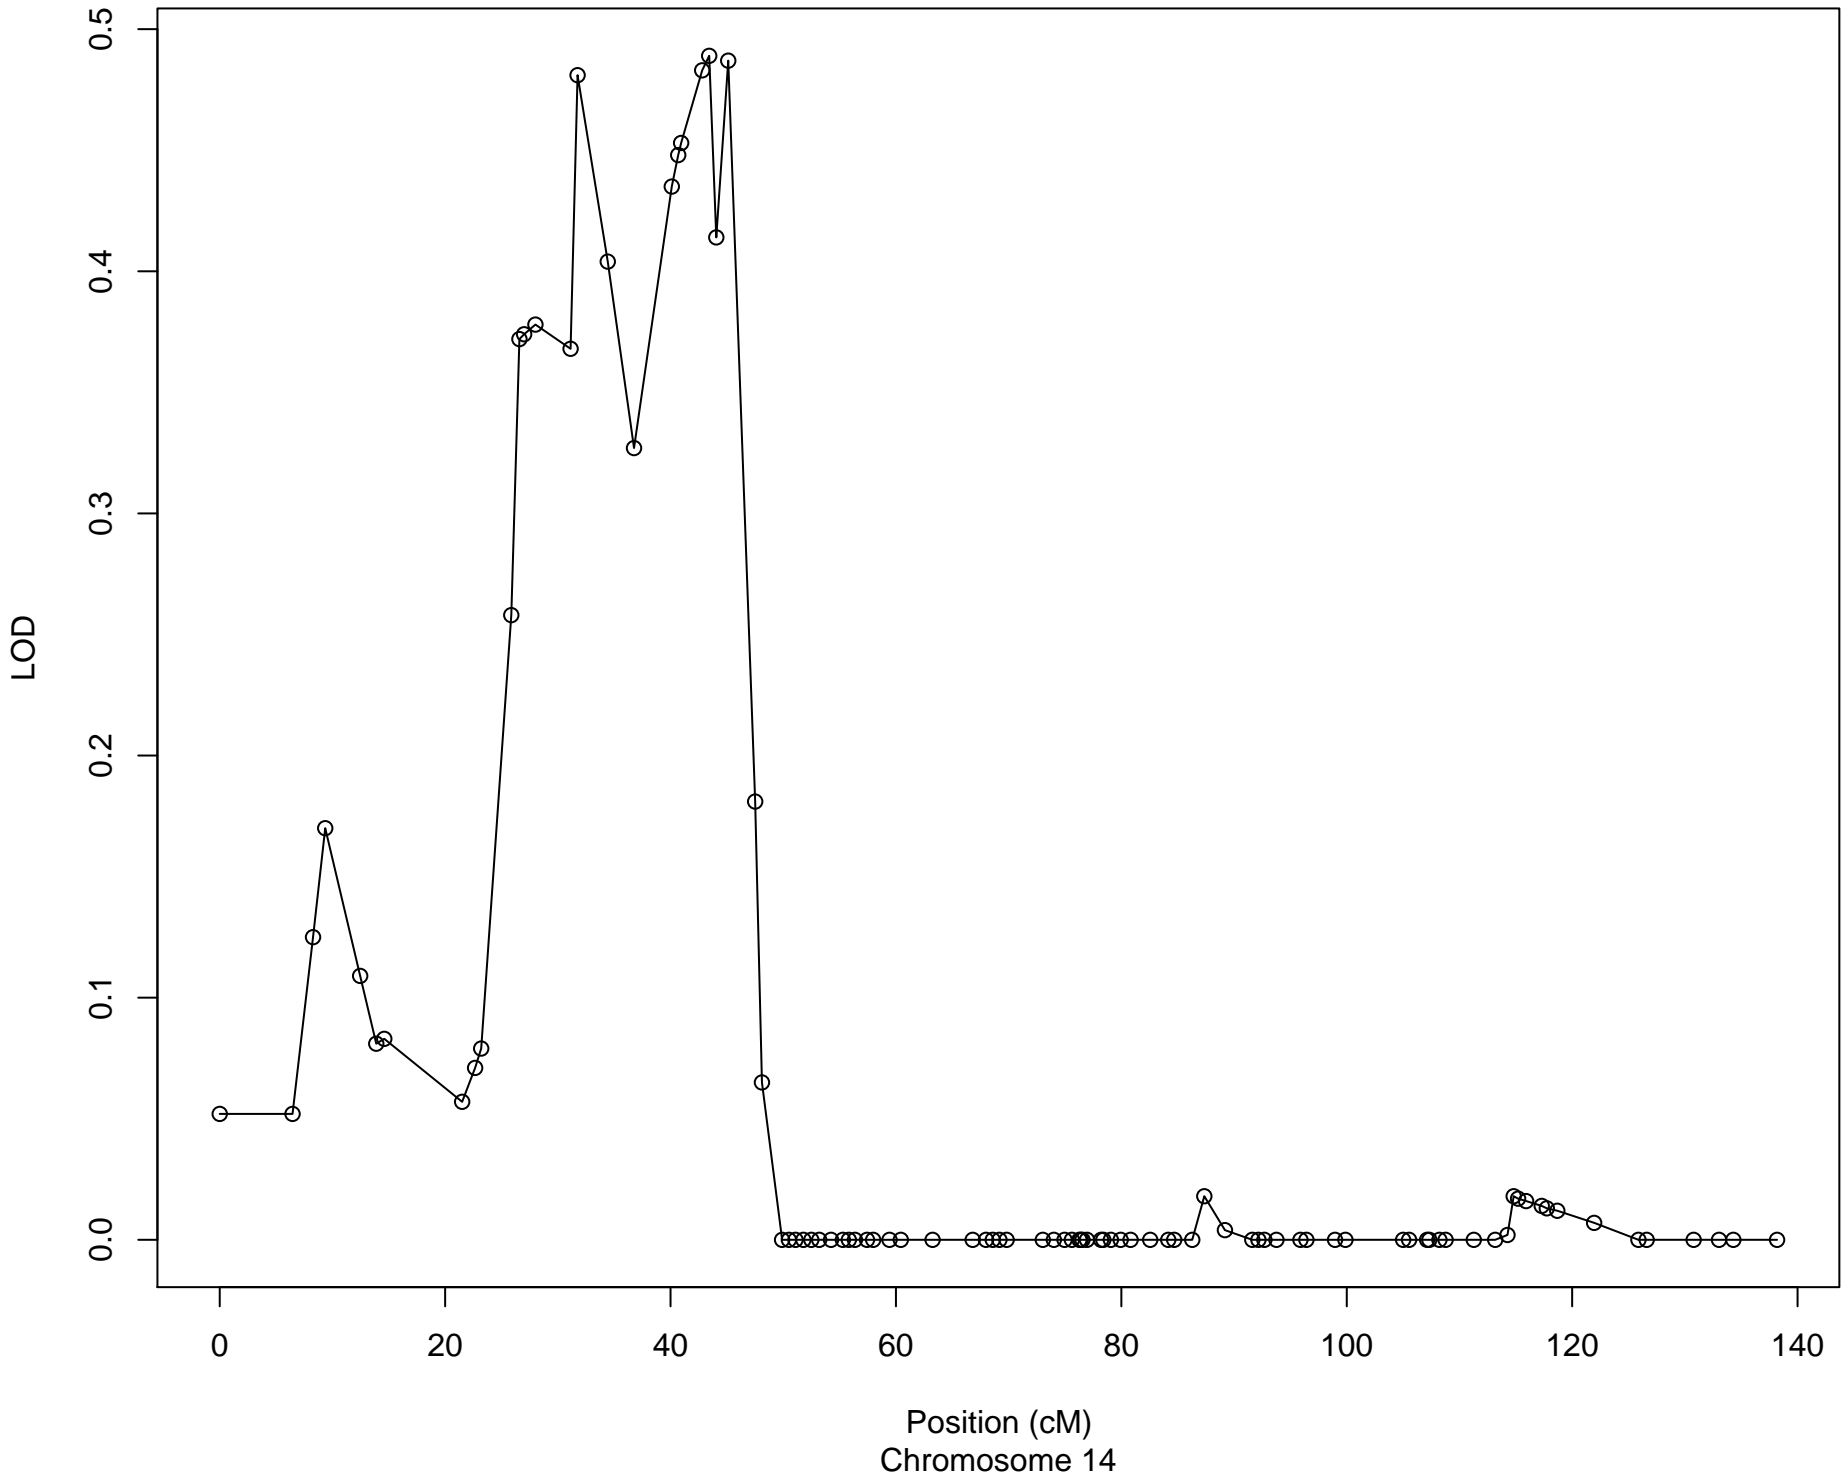

# Growth (1) (GR\_1)

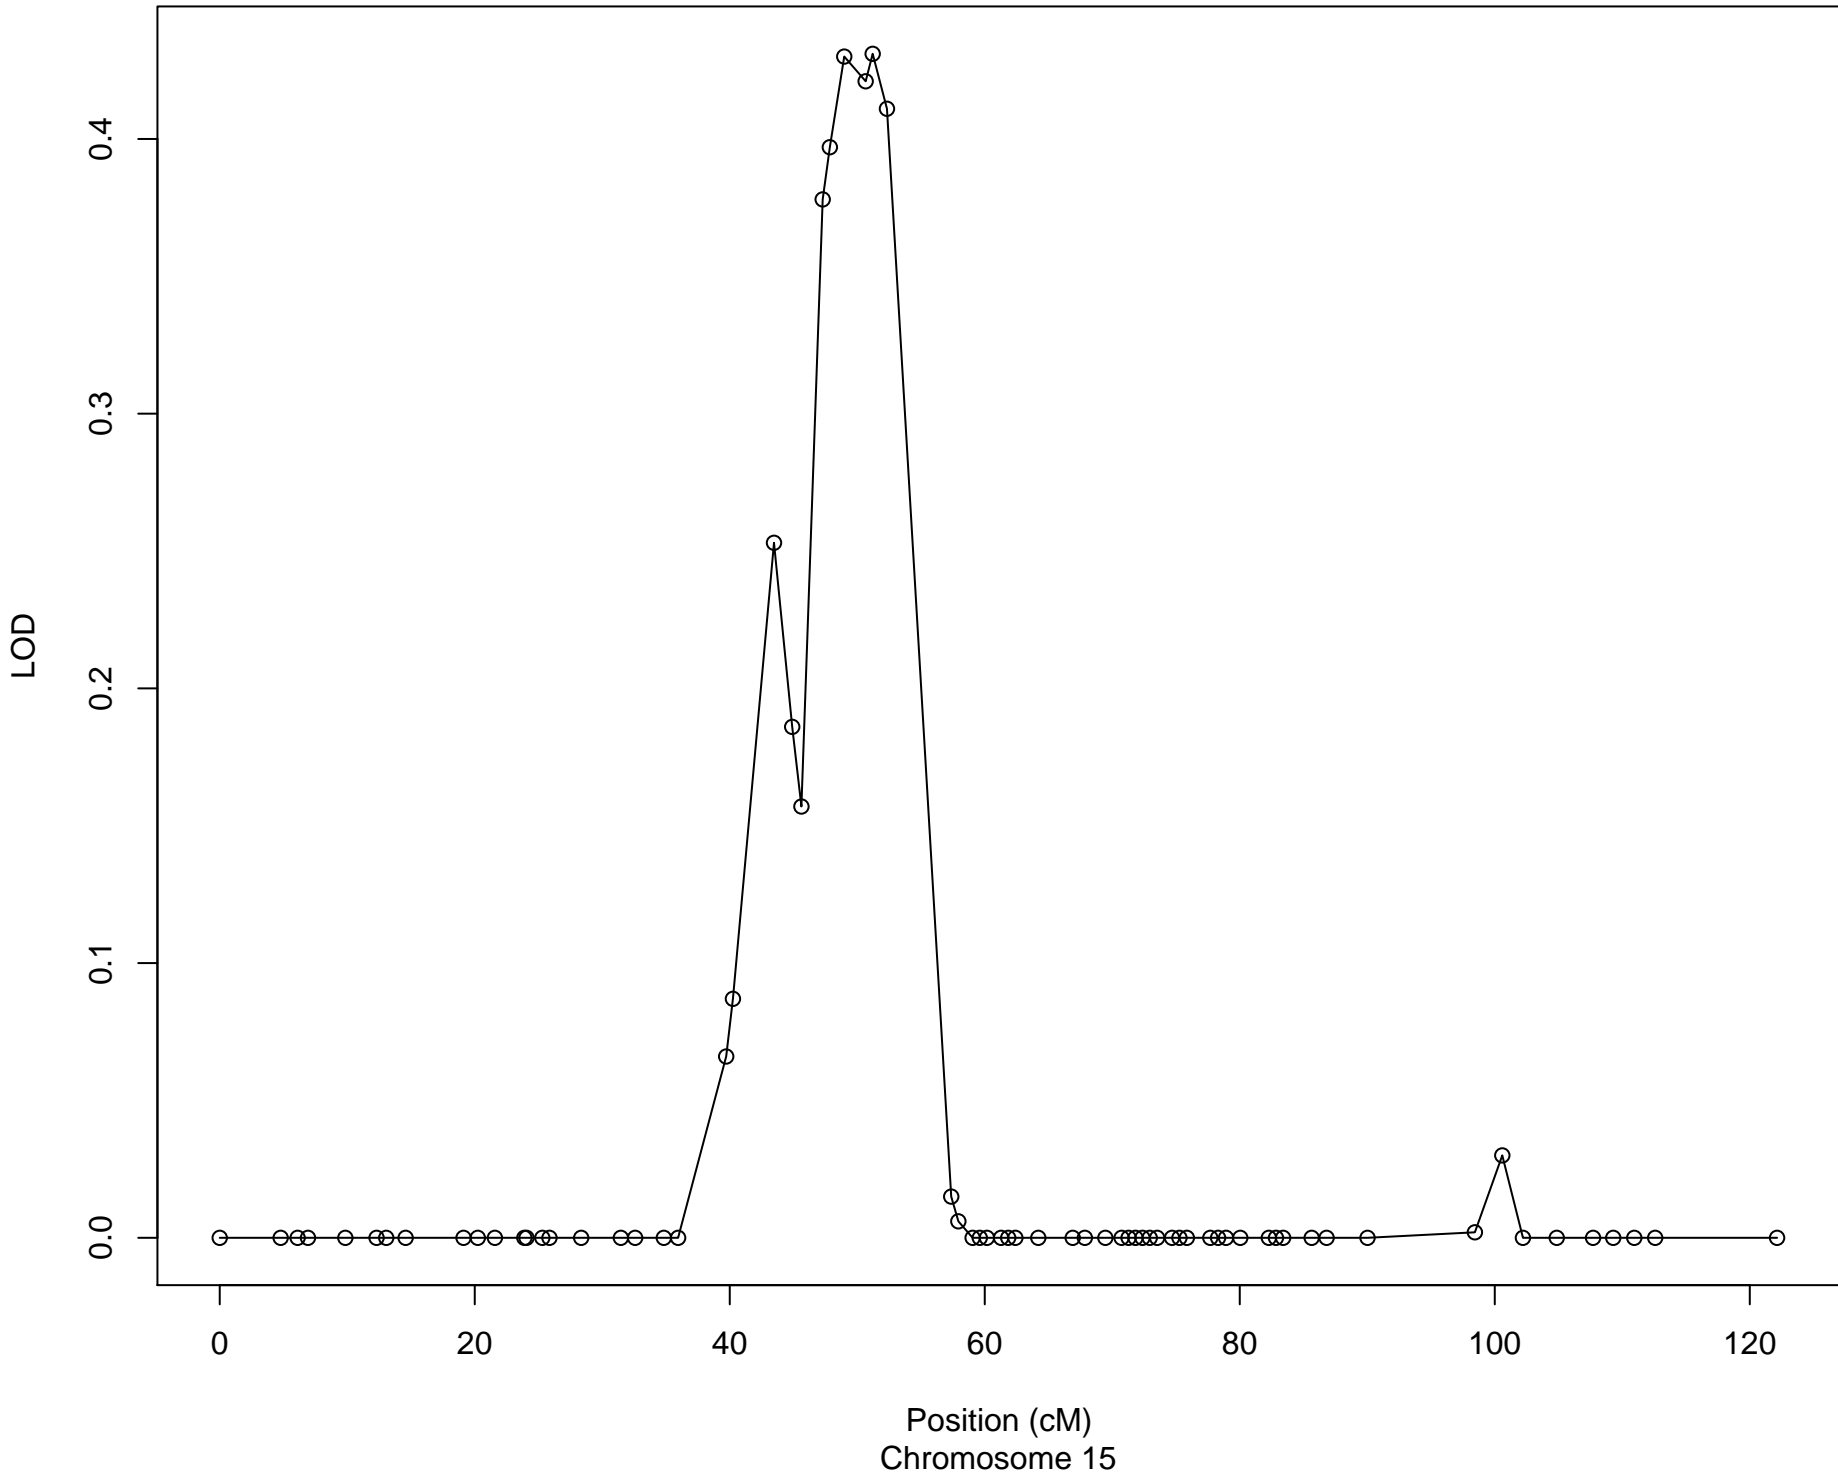

# Growth (1) (GR\_1)

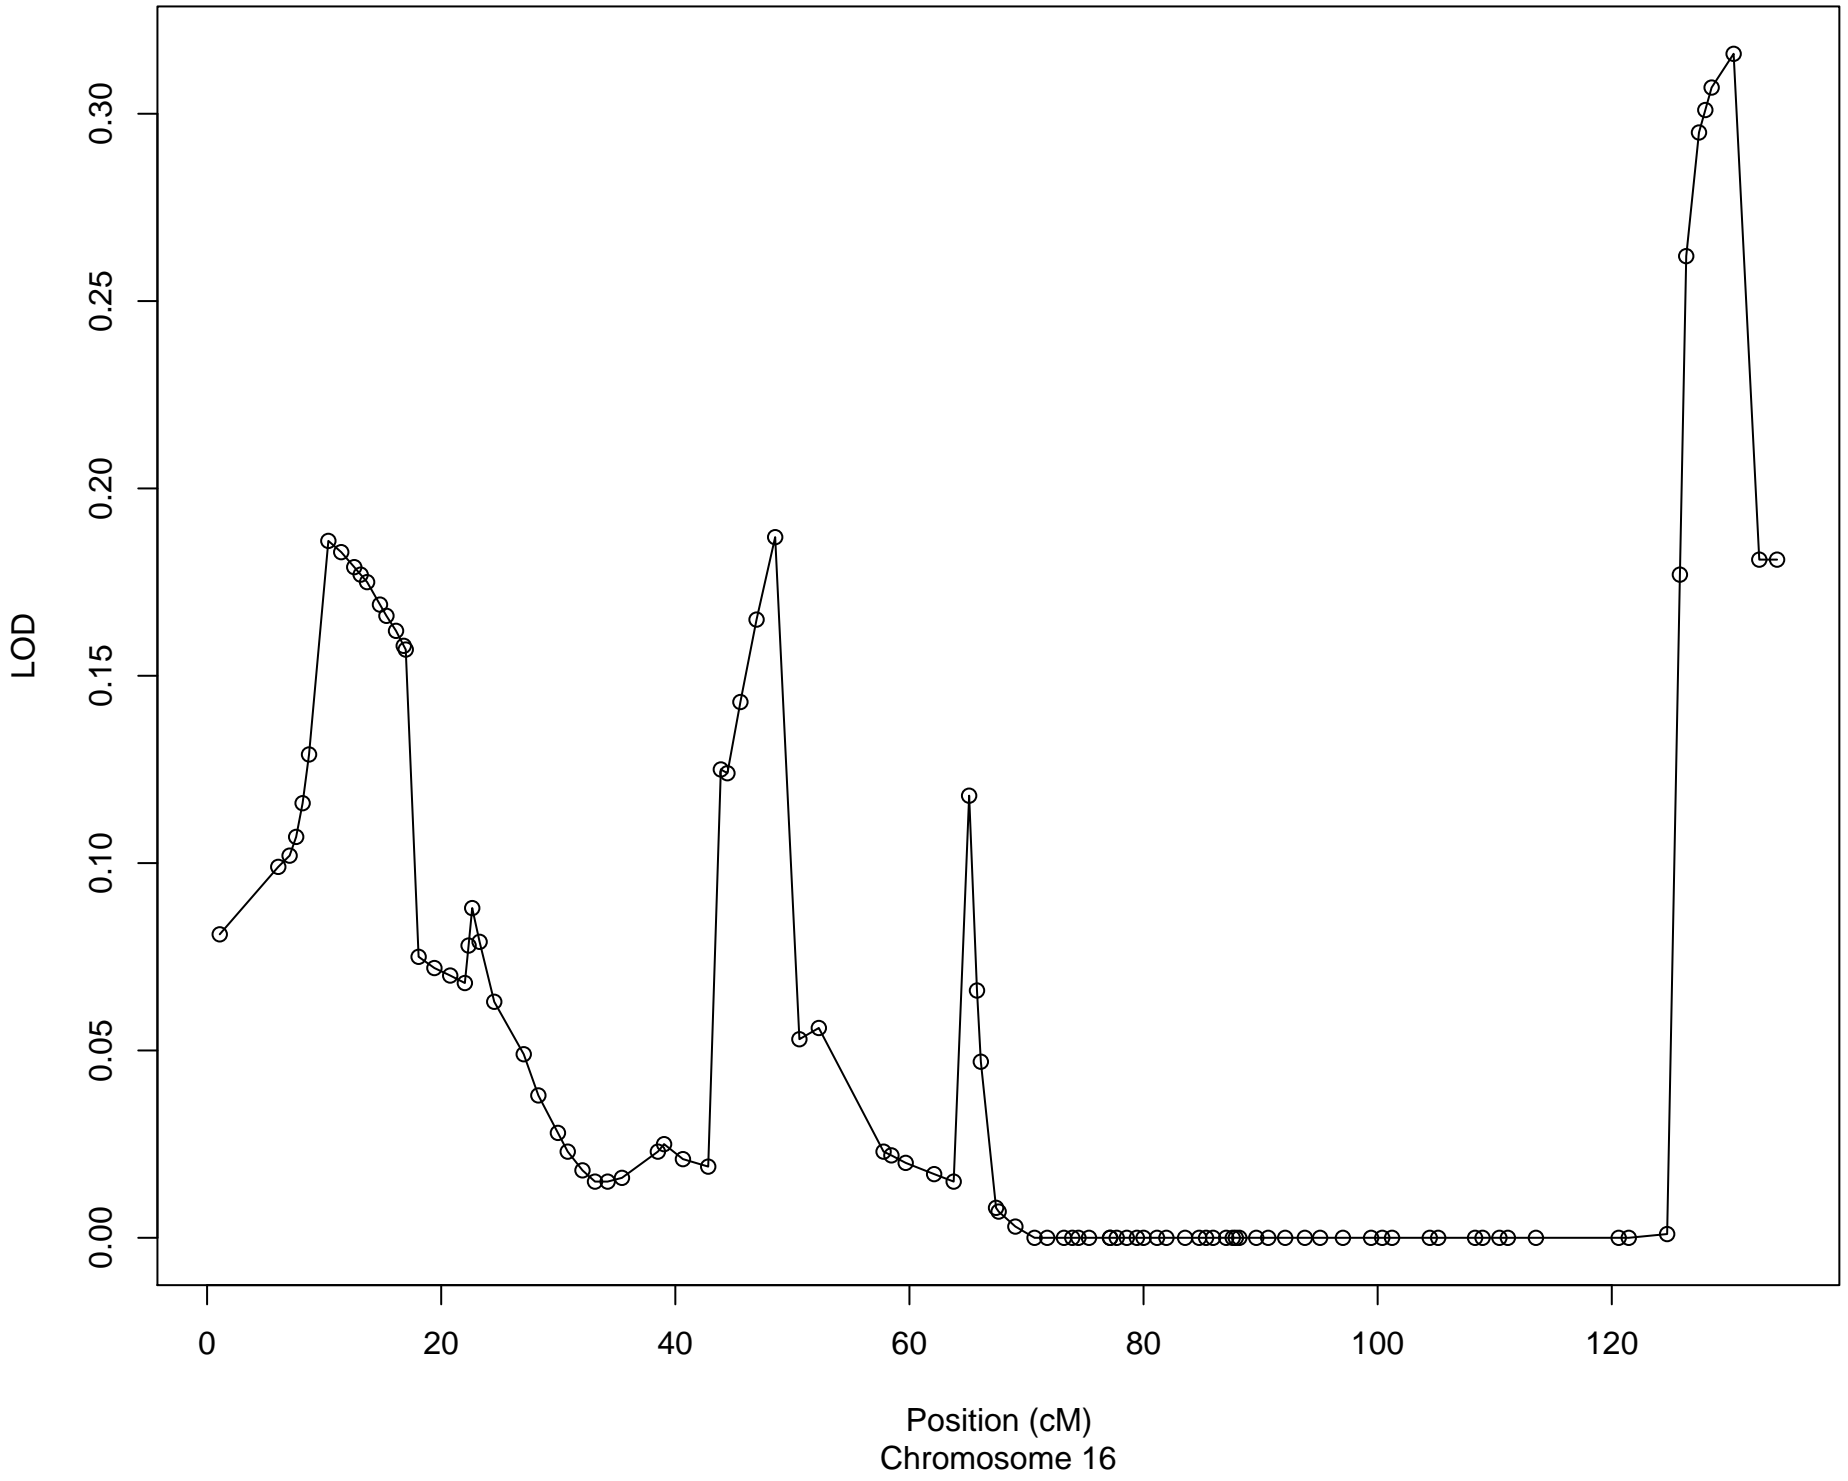

# Growth (1) (GR\_1)

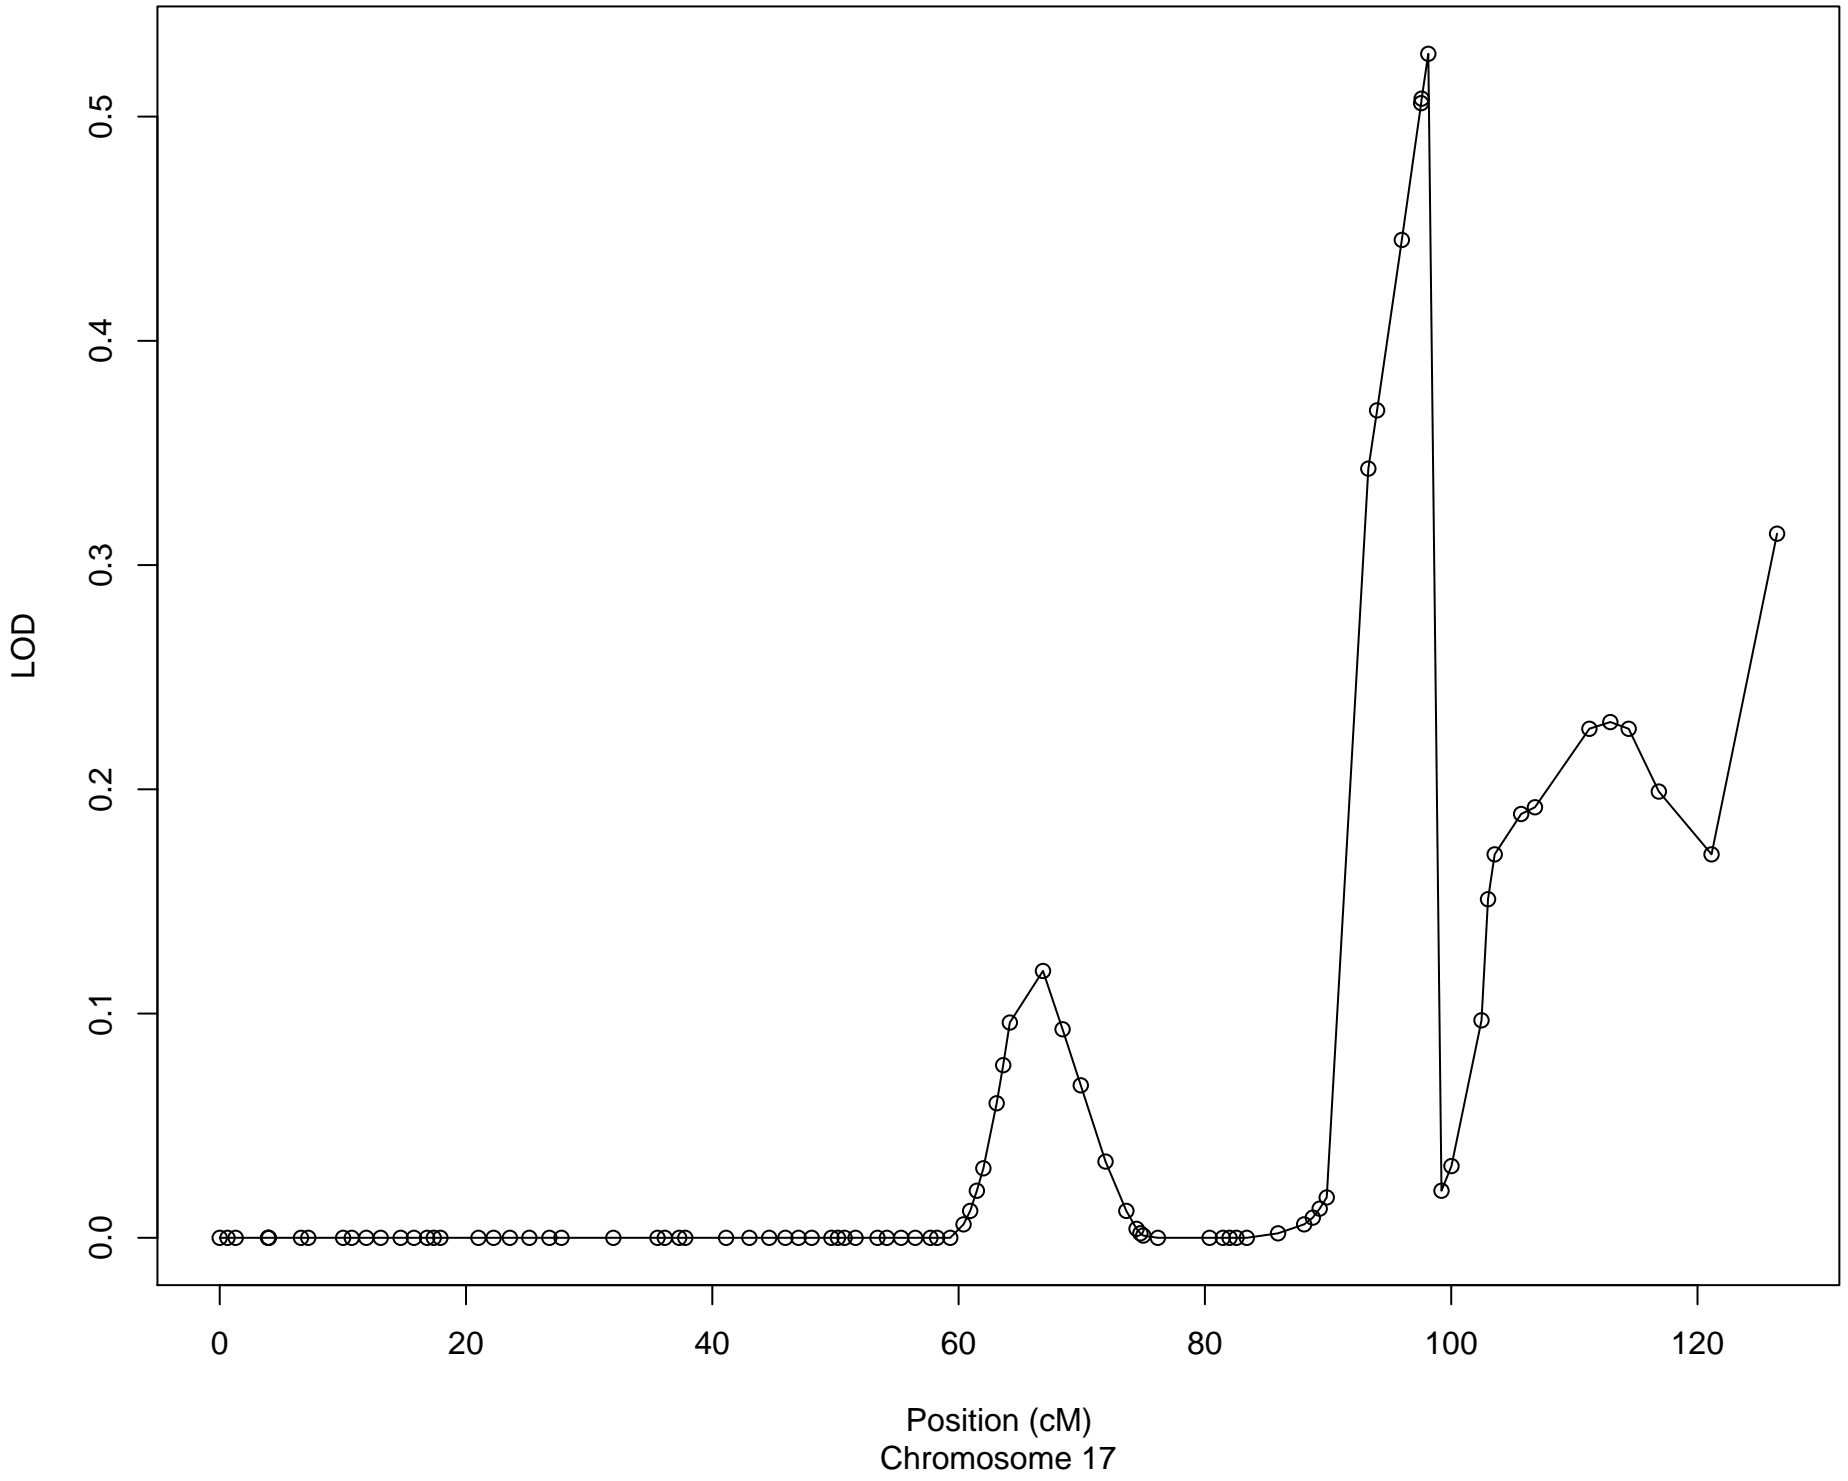

# Growth (1) (GR\_1)

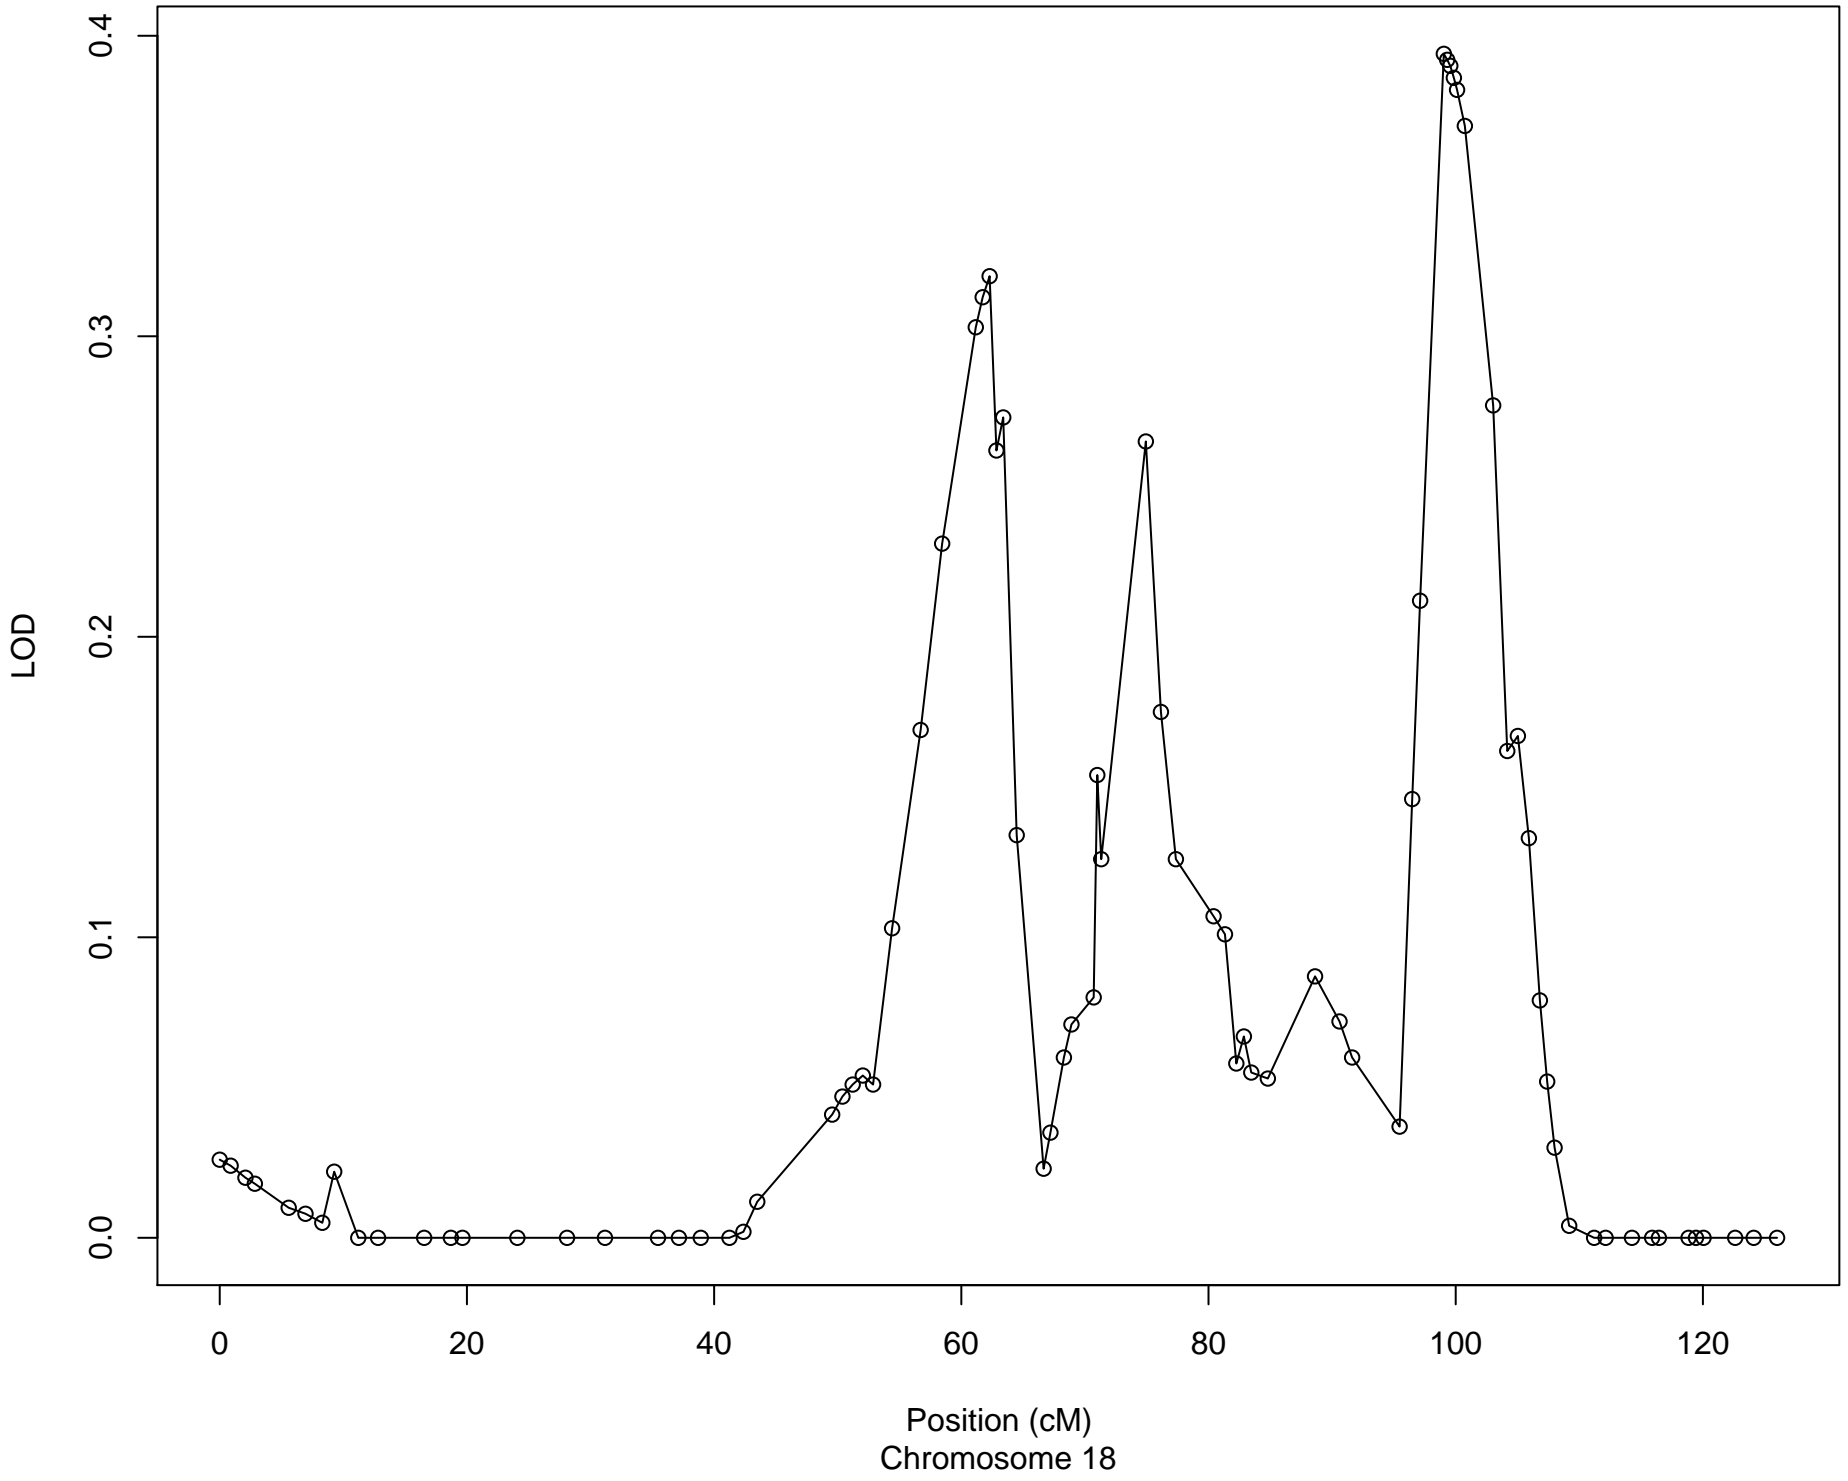



# Growth (1) (GR\_1)

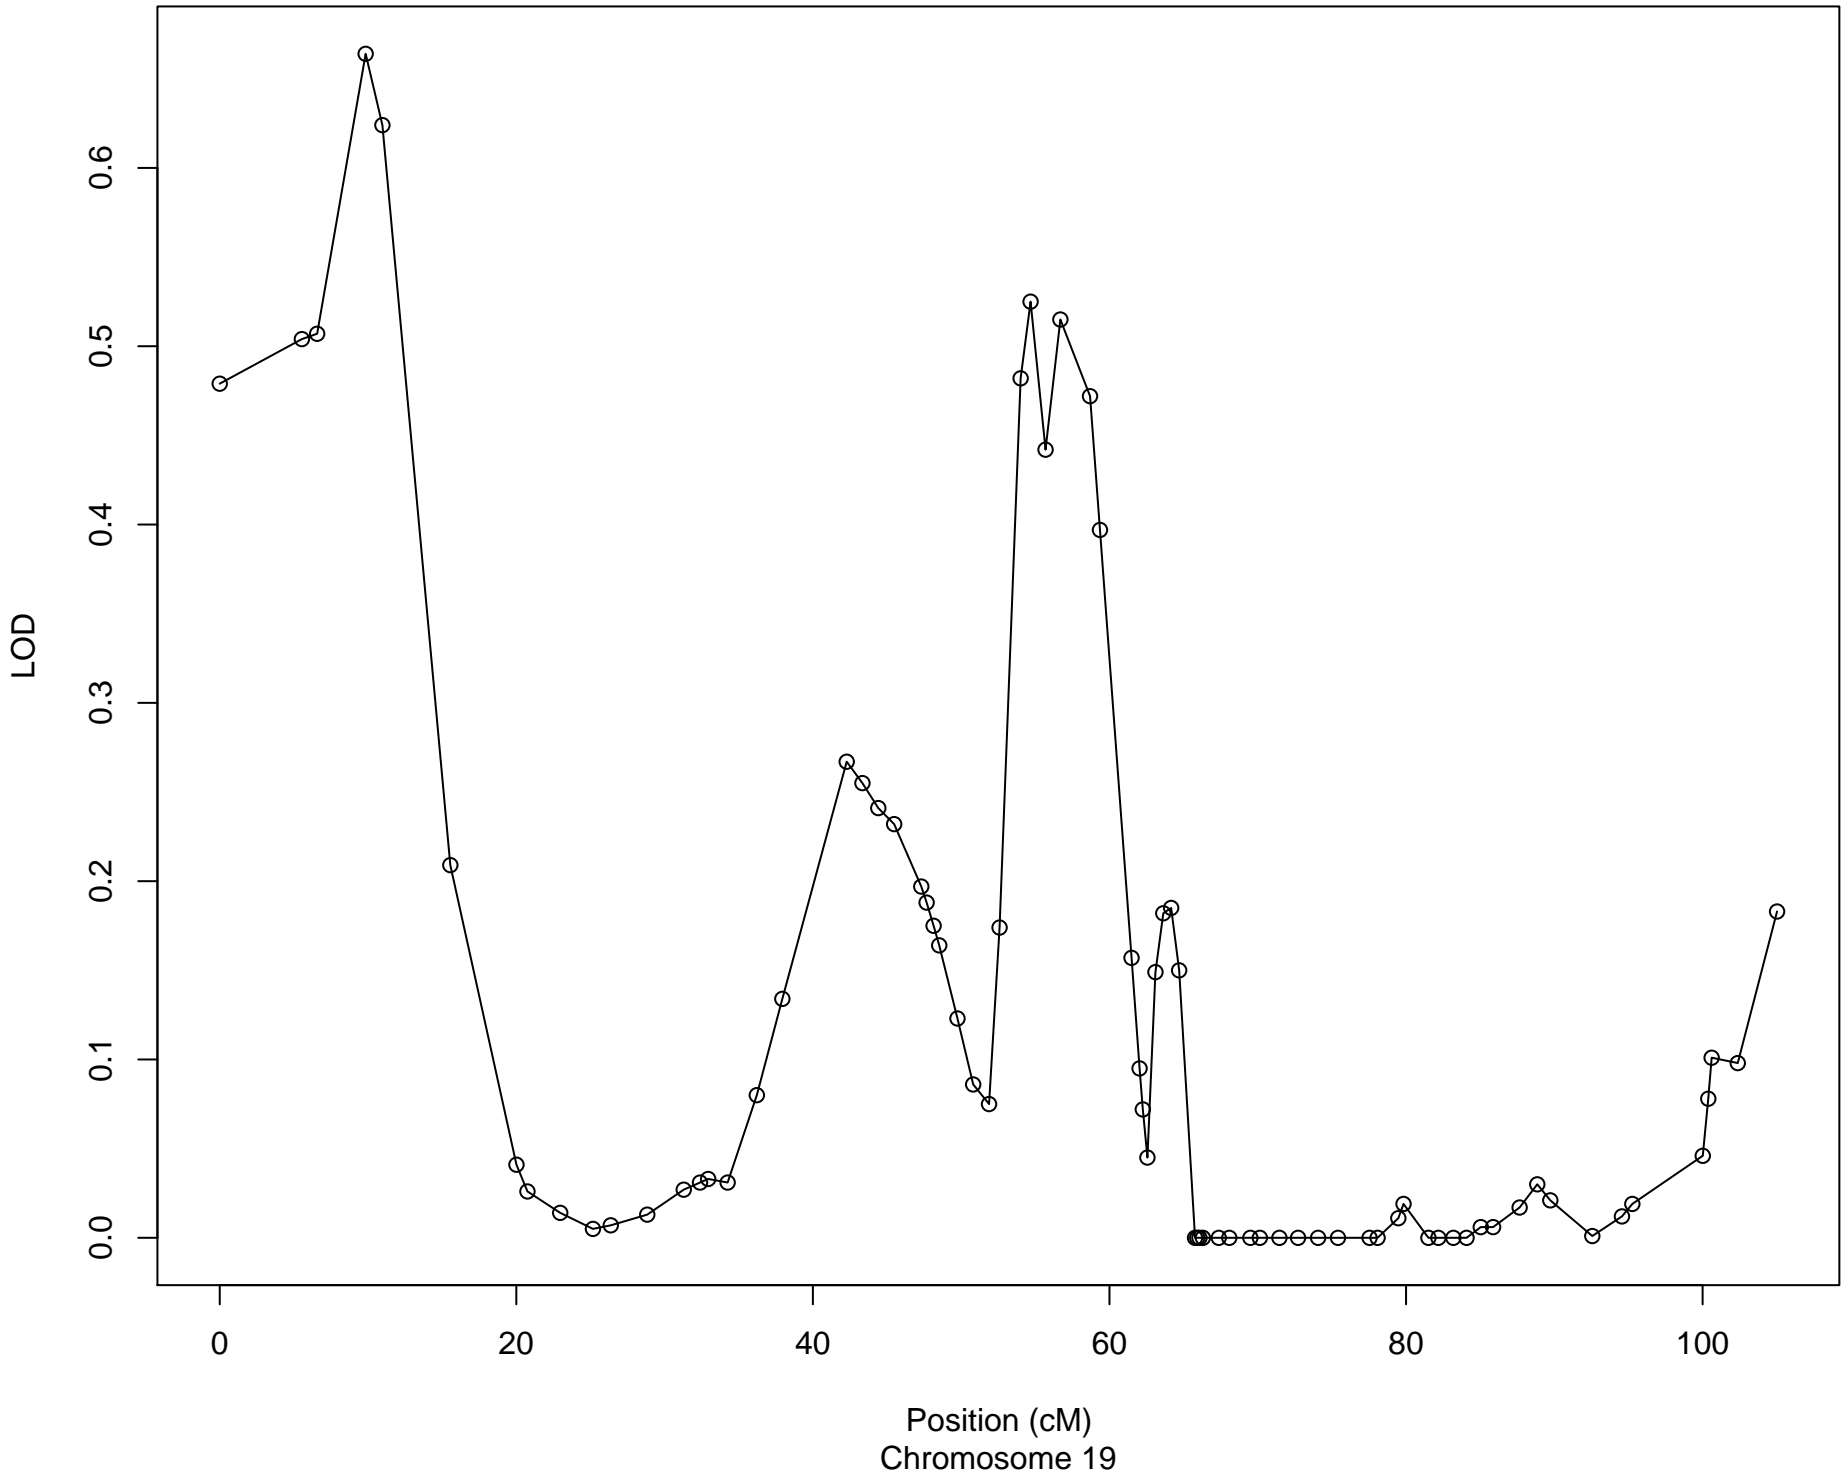

# Growth (1) (GR\_1)

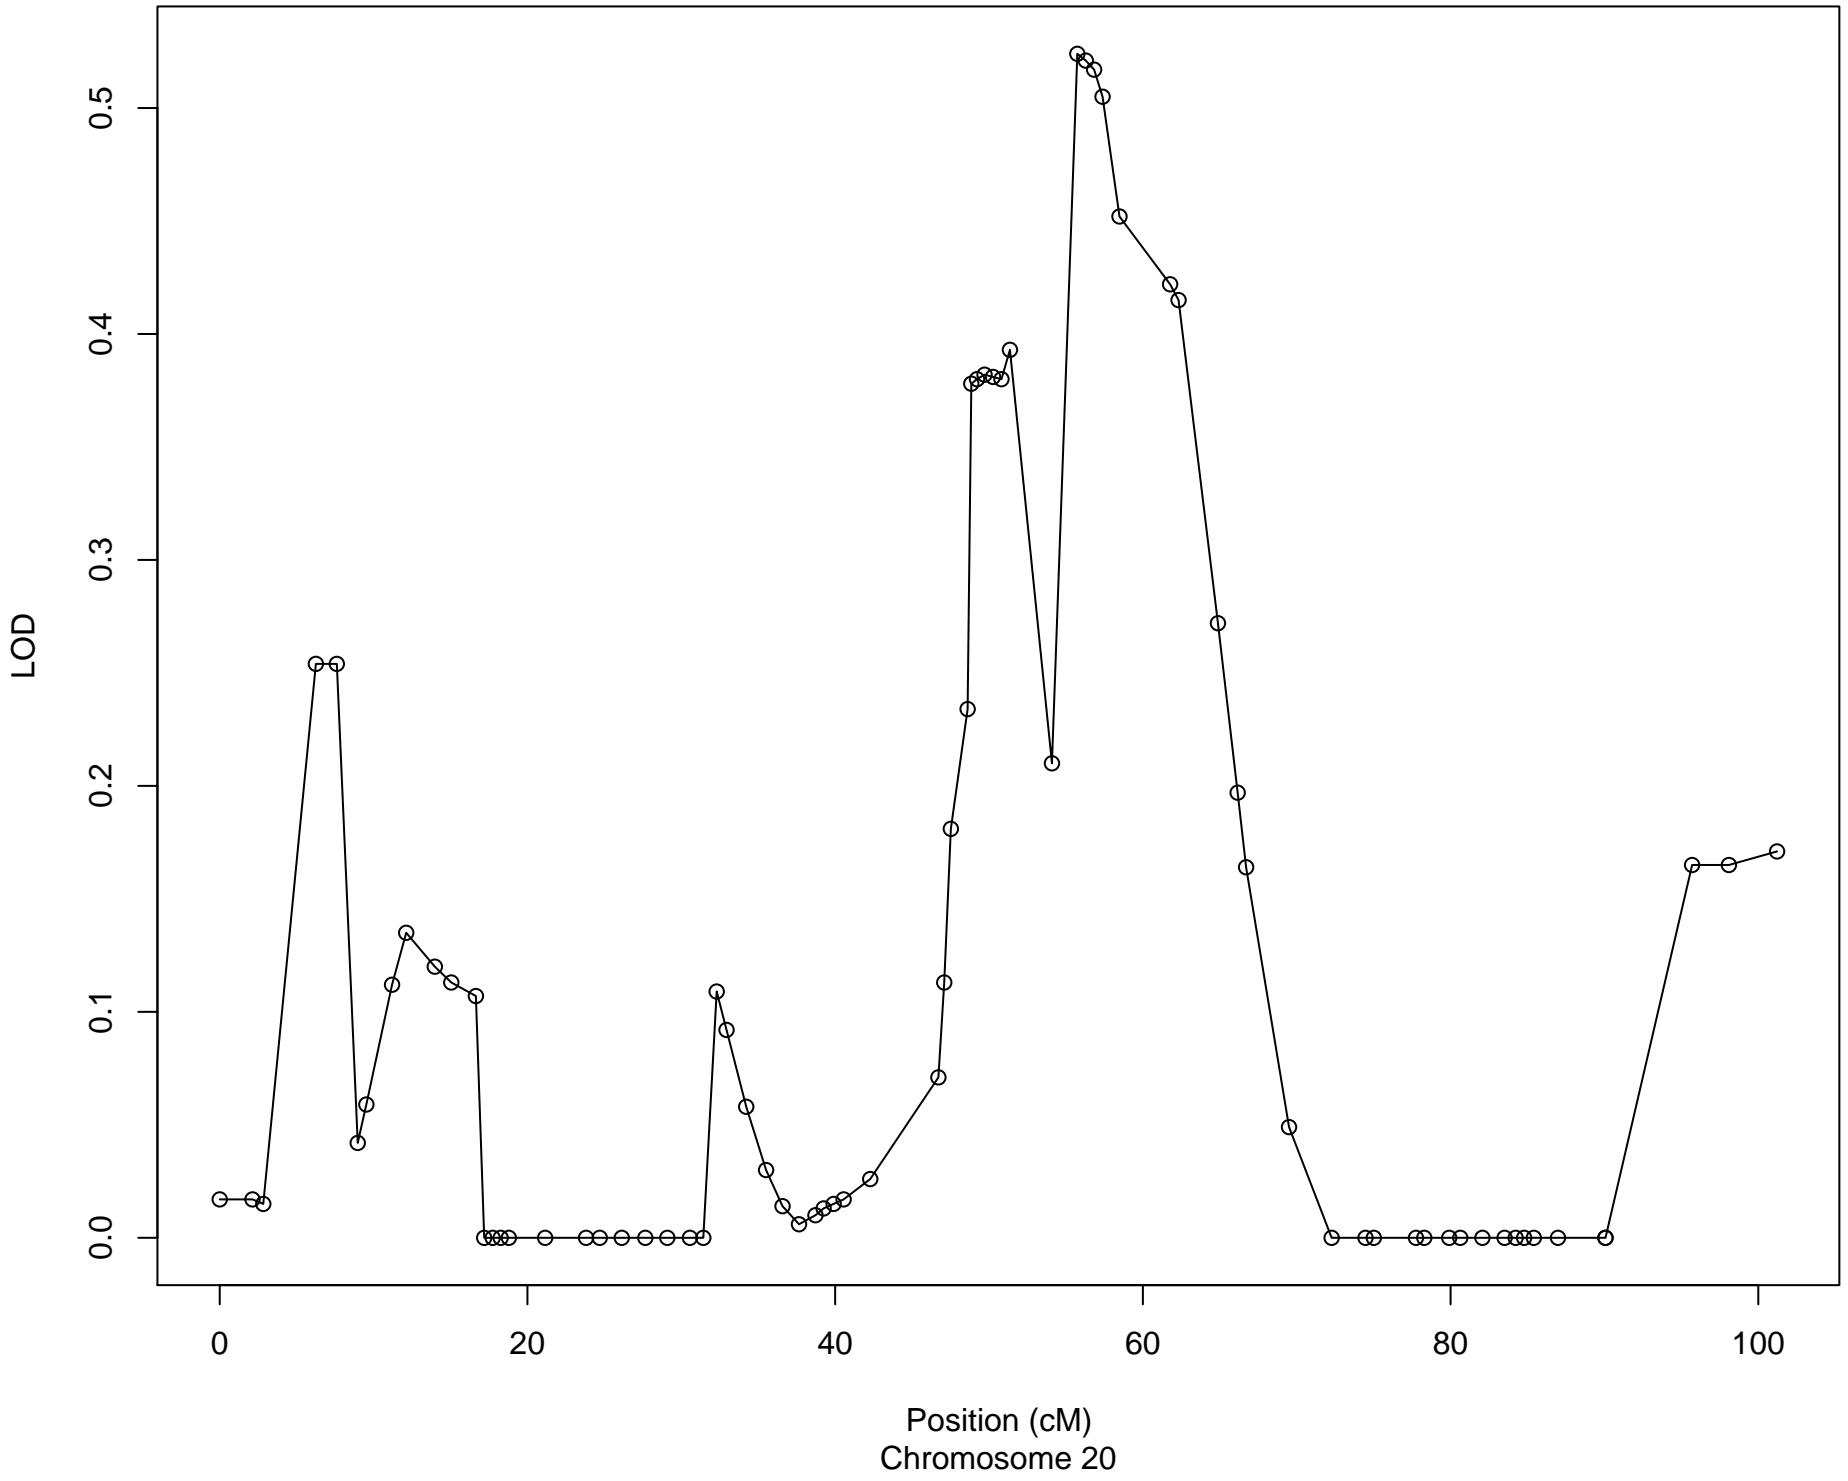

Growth (1) (GR\_1)

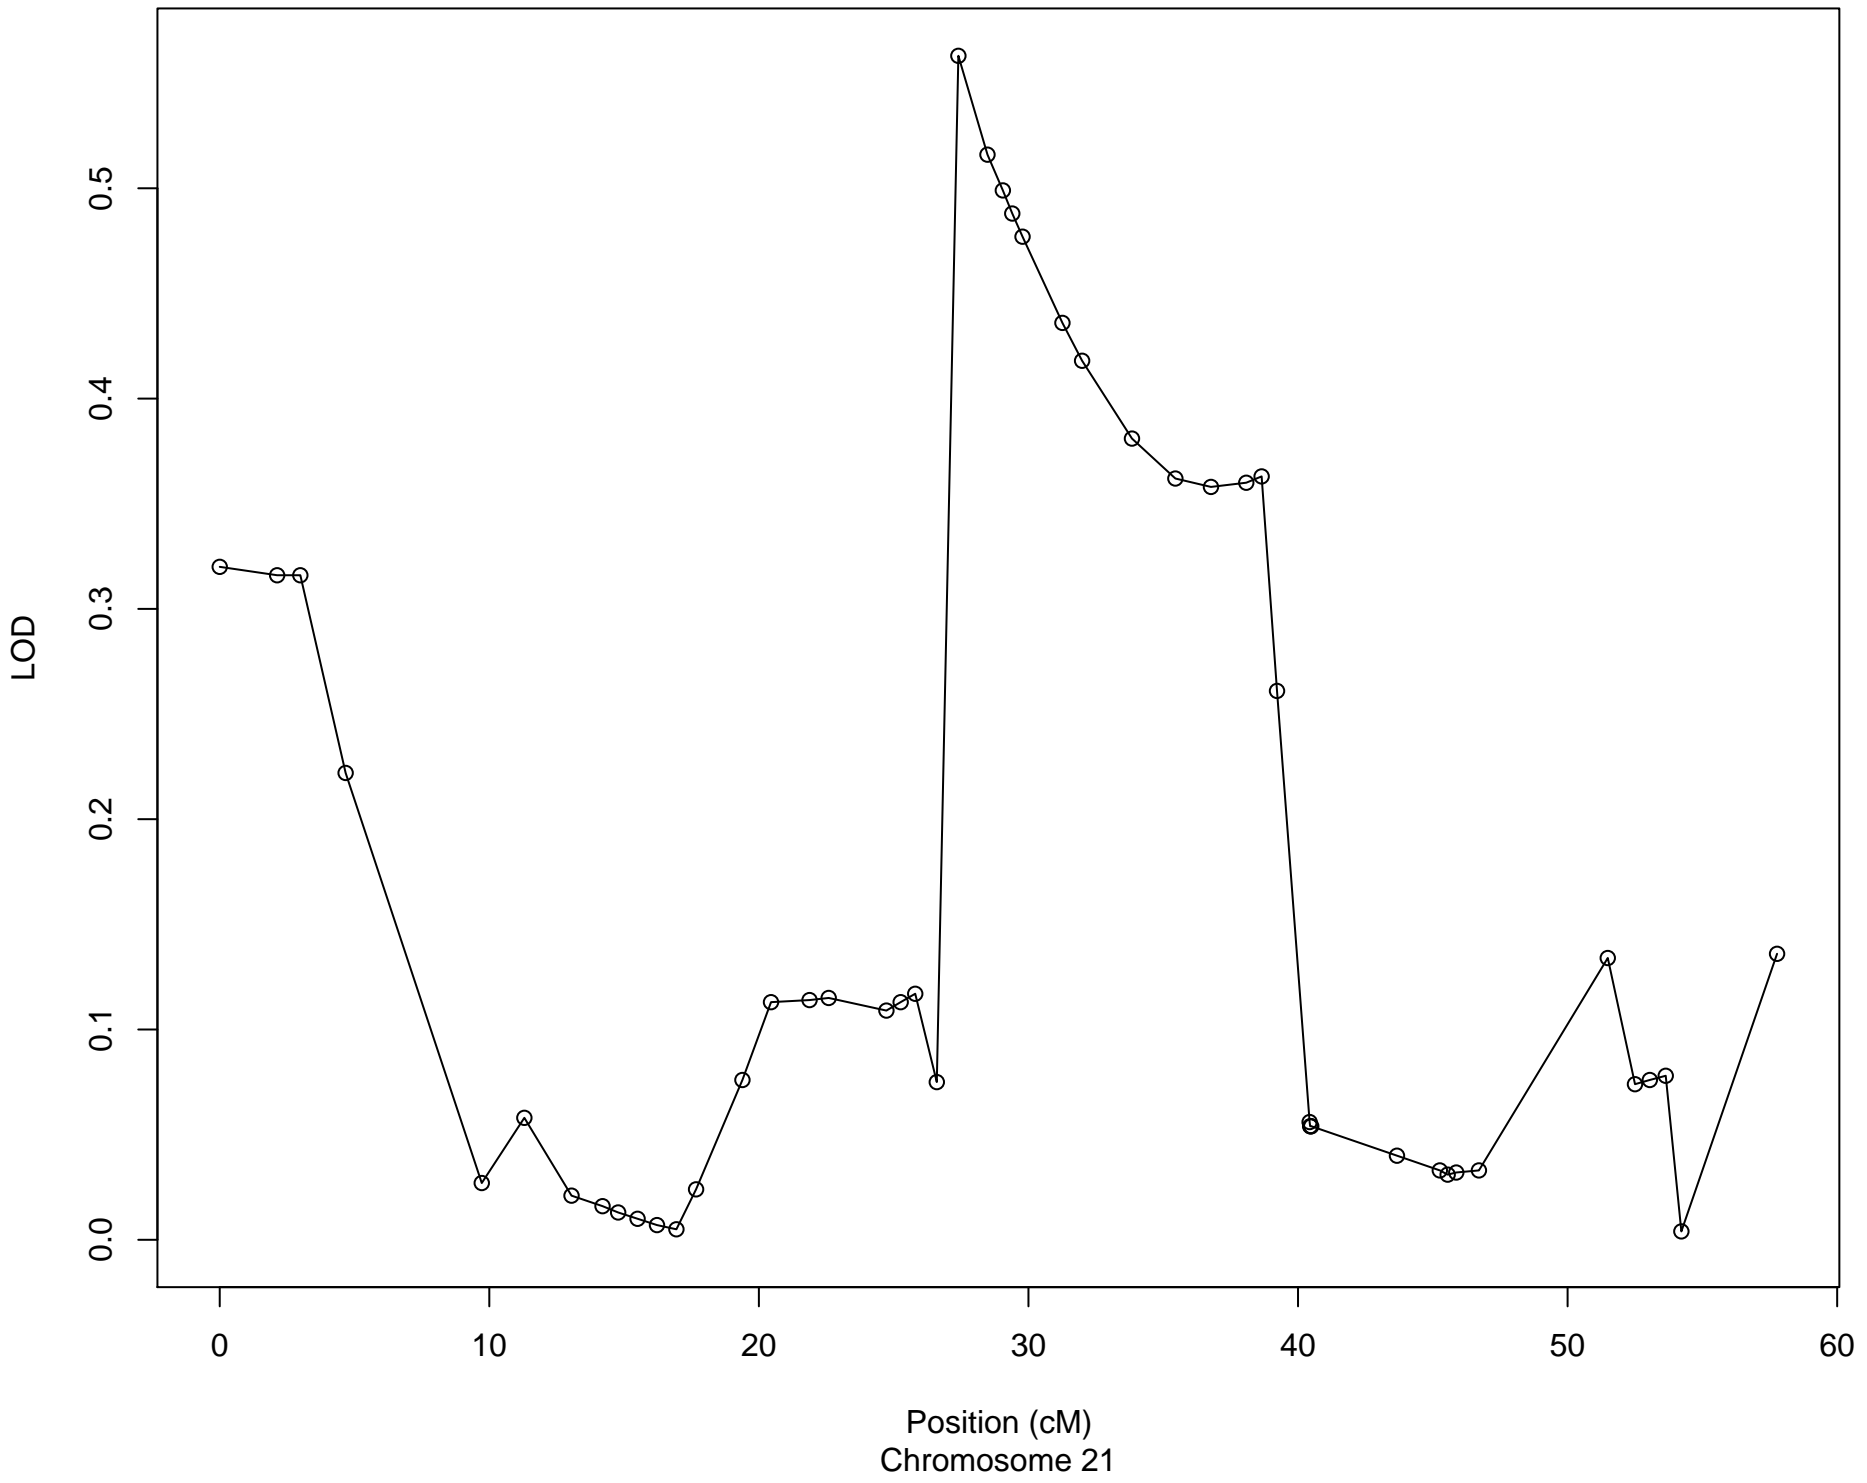

# Growth (1) (GR\_1)

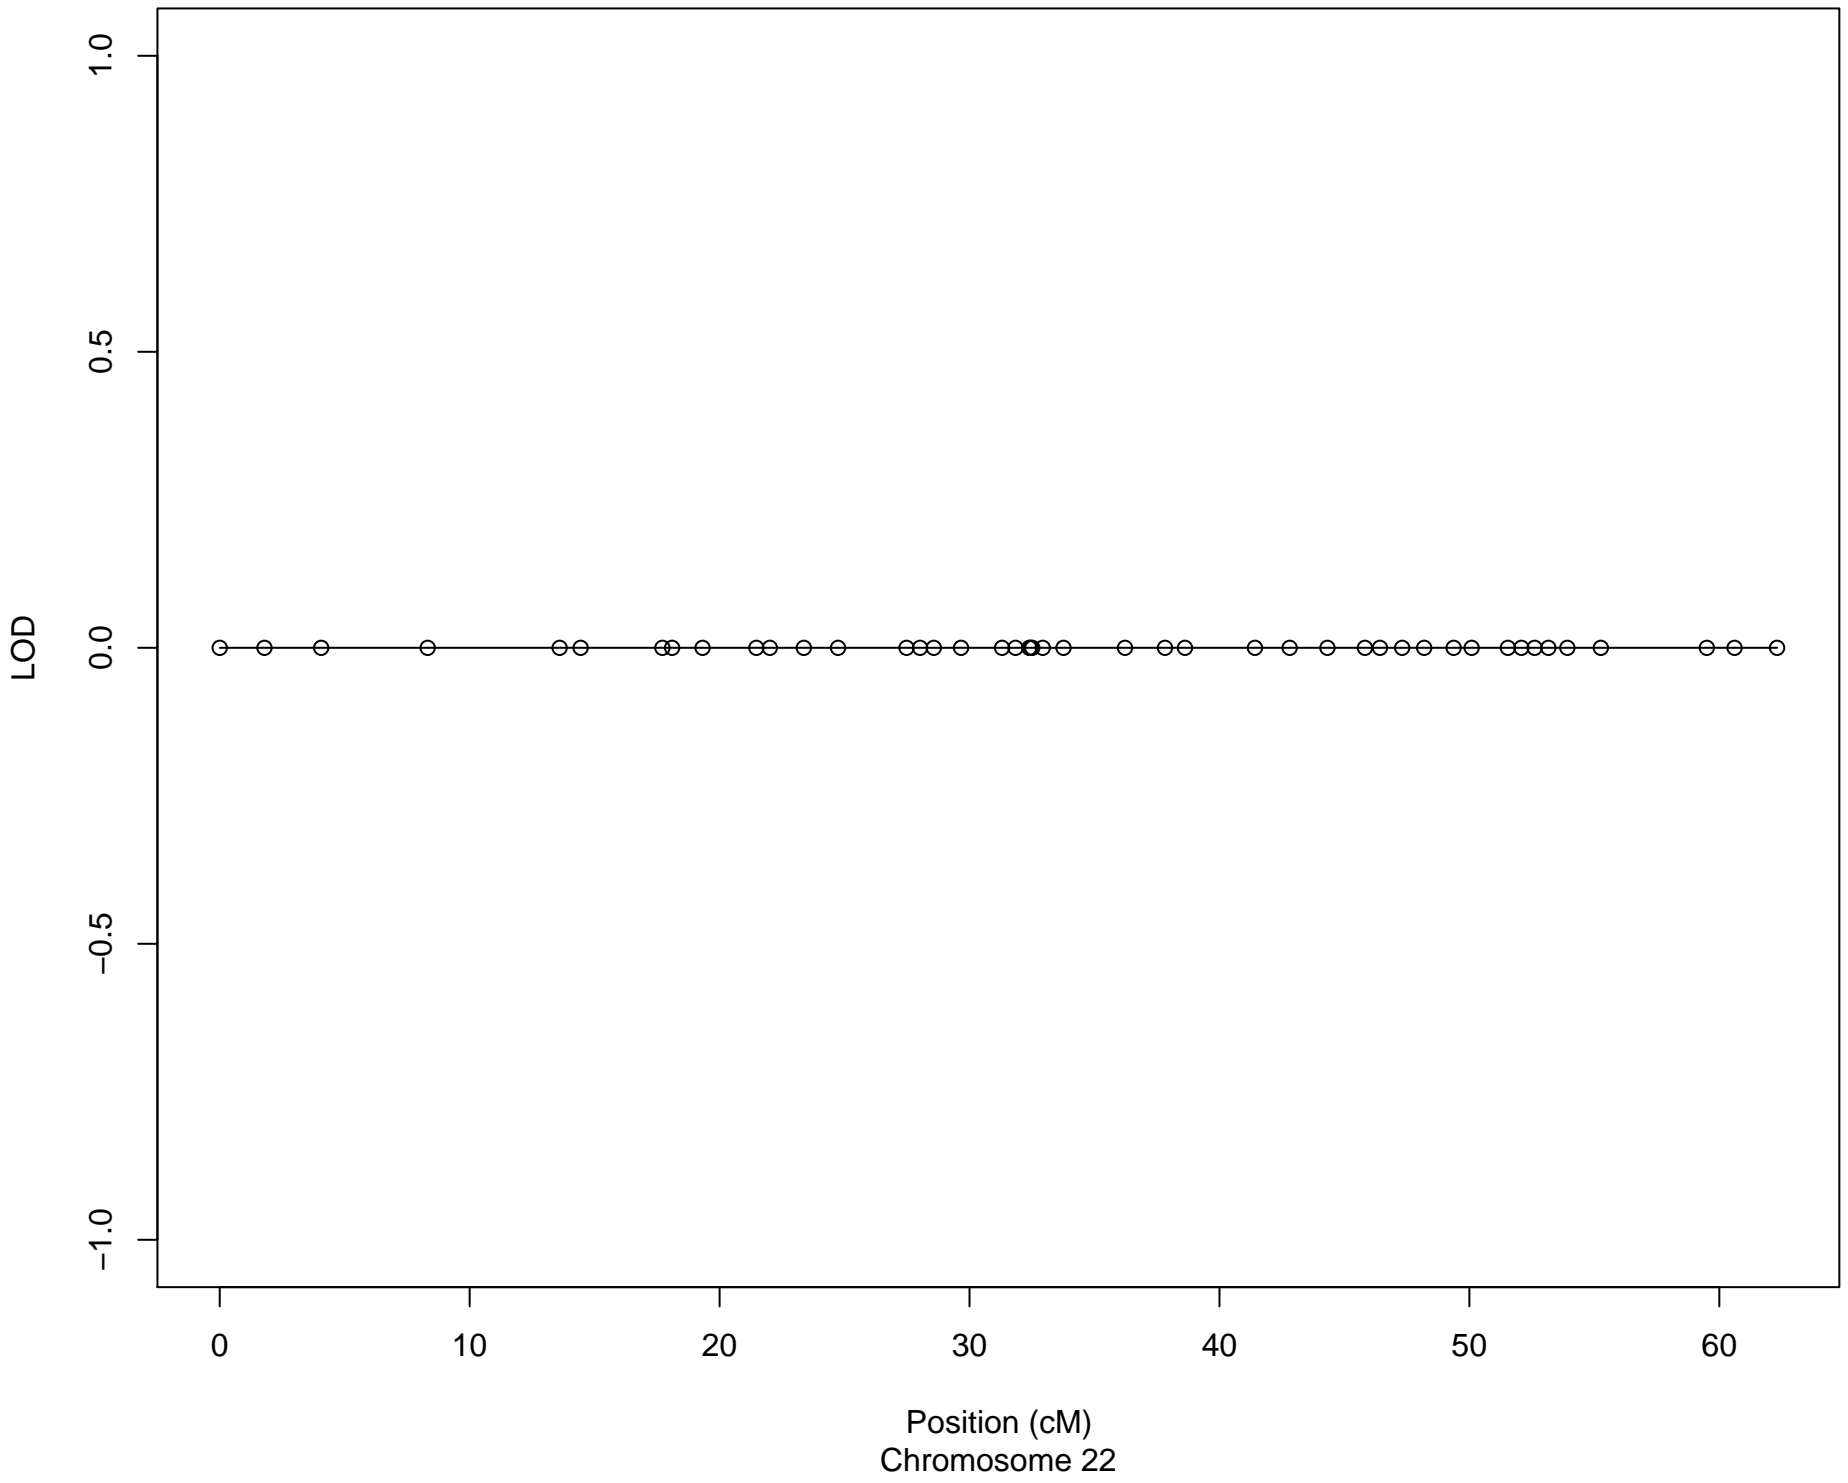

# 10-hydroxy-camptothecin (hCPT)

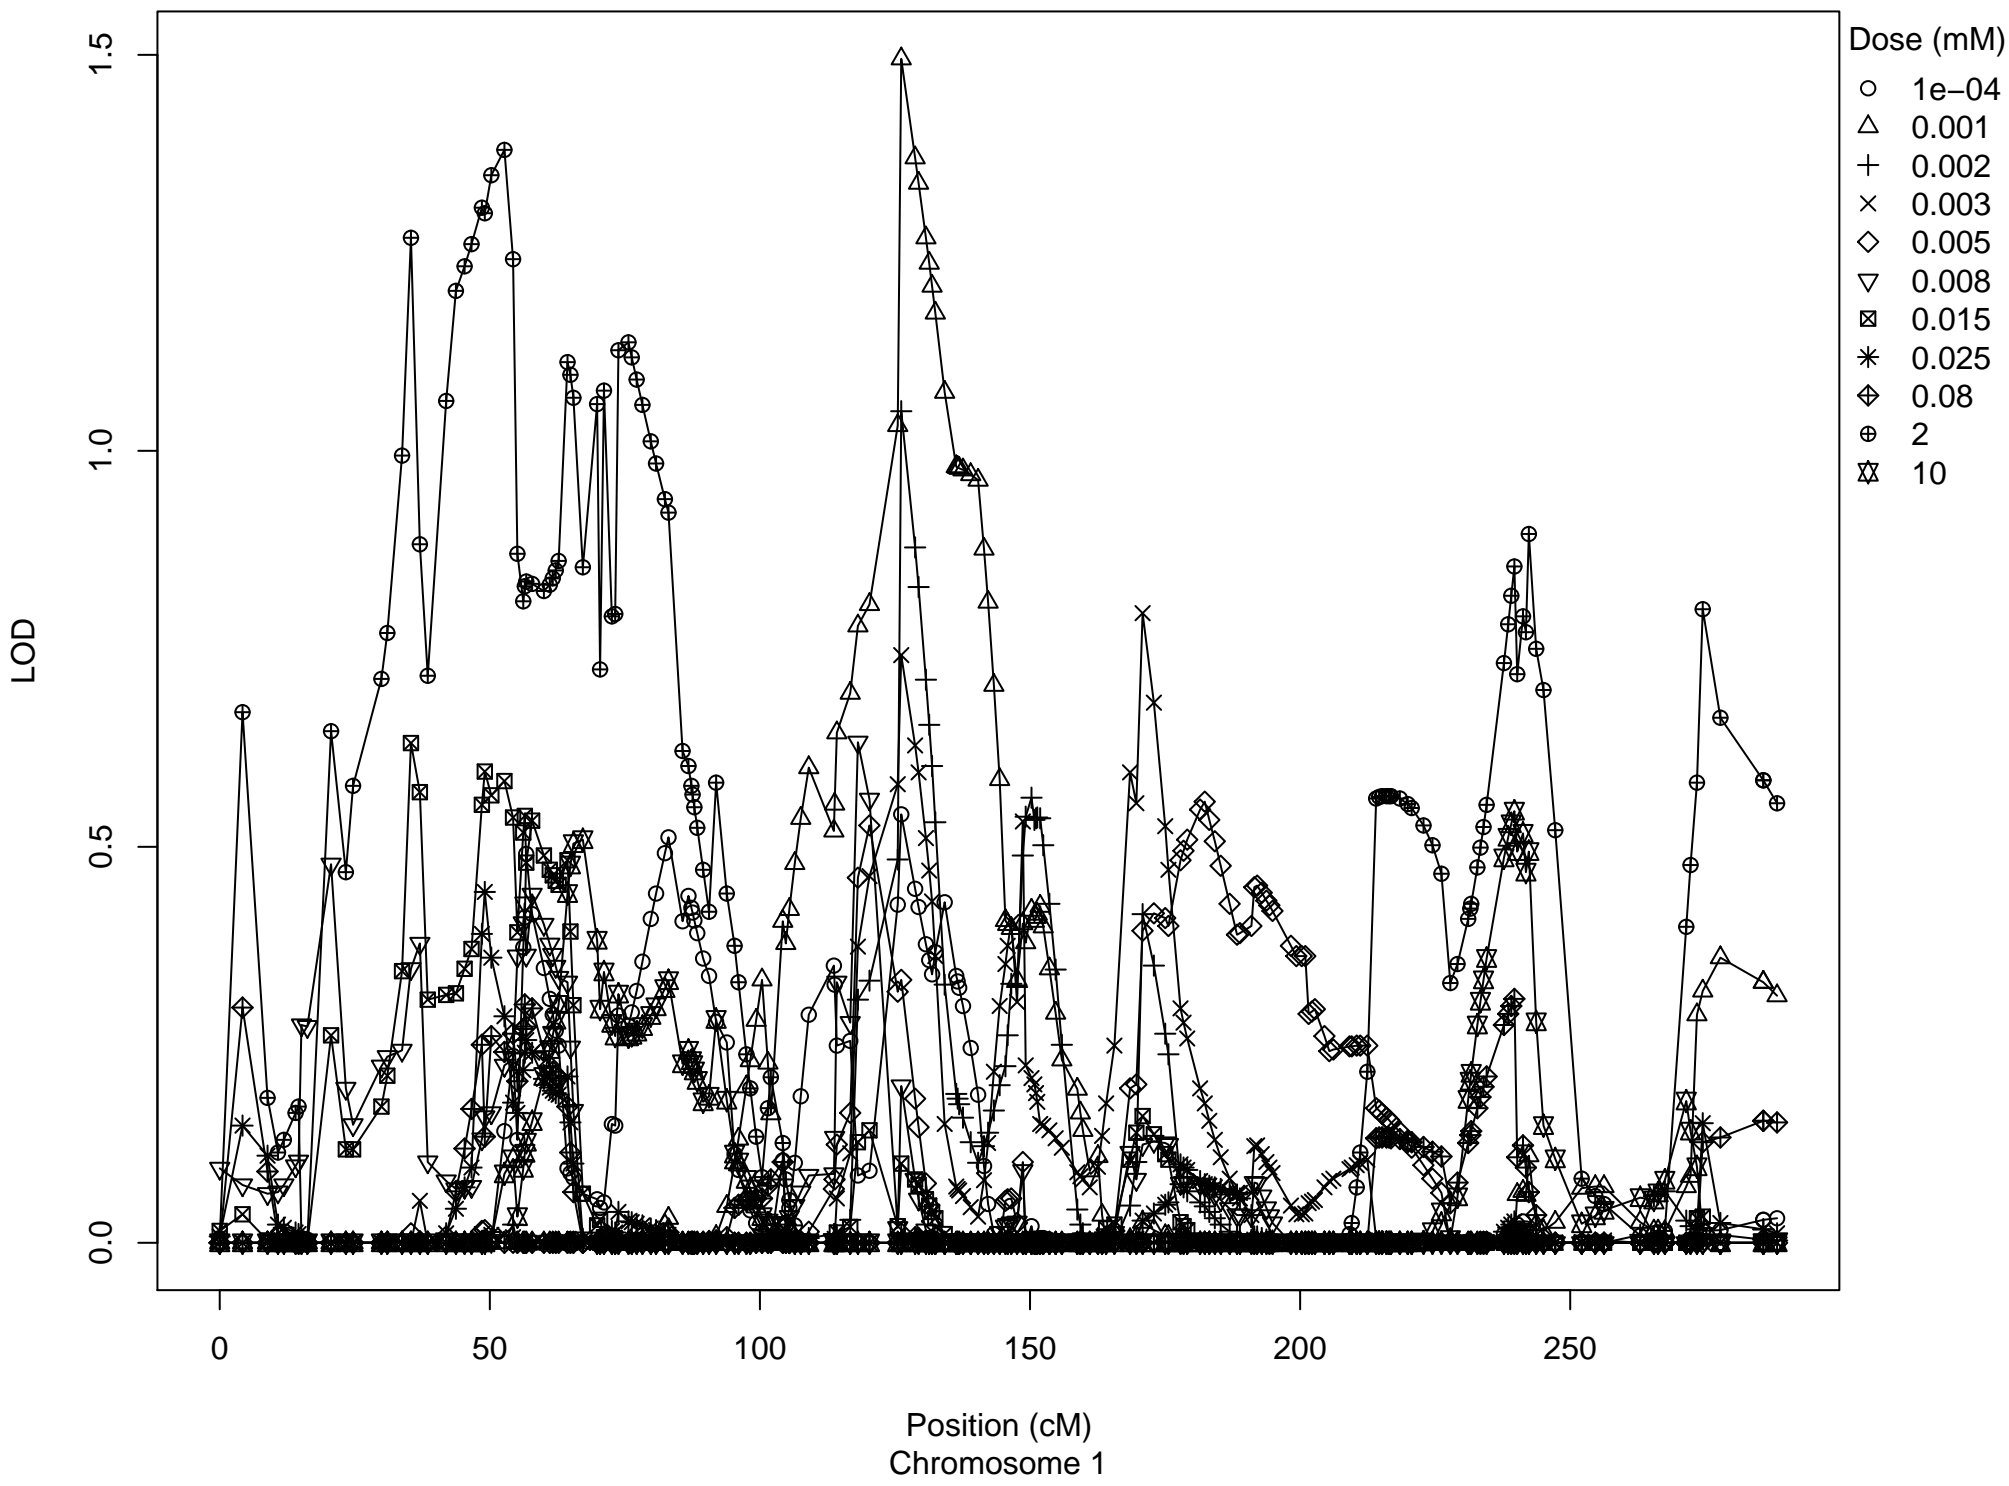

# 10-hydroxy-camptothecin (hCPT)

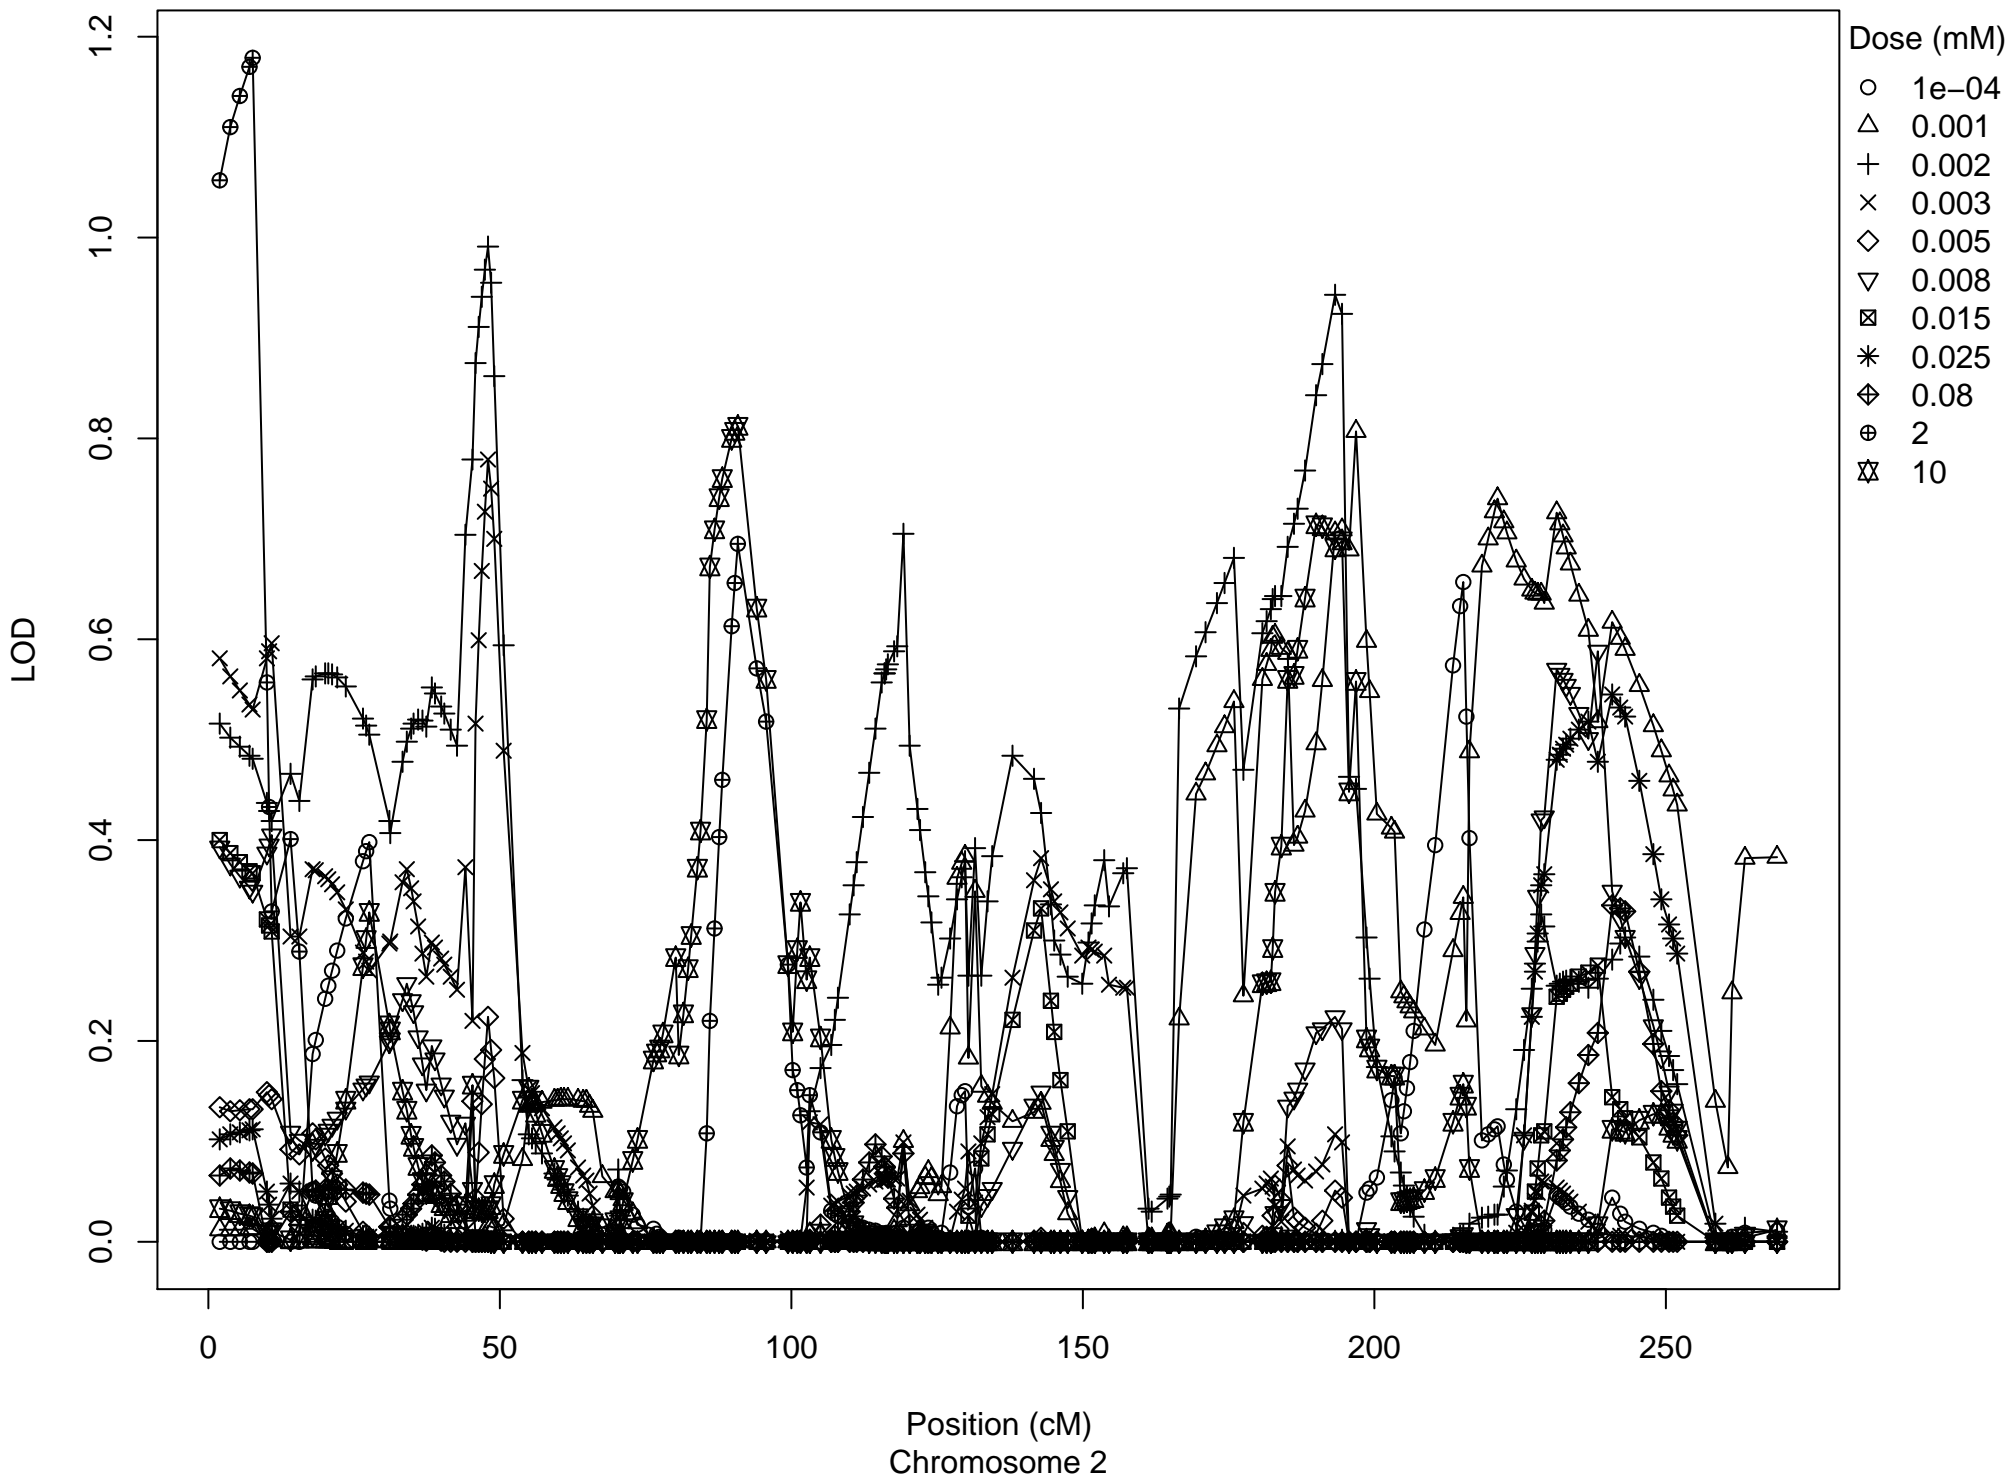

# 10-hydroxy-camptothecin (hCPT)

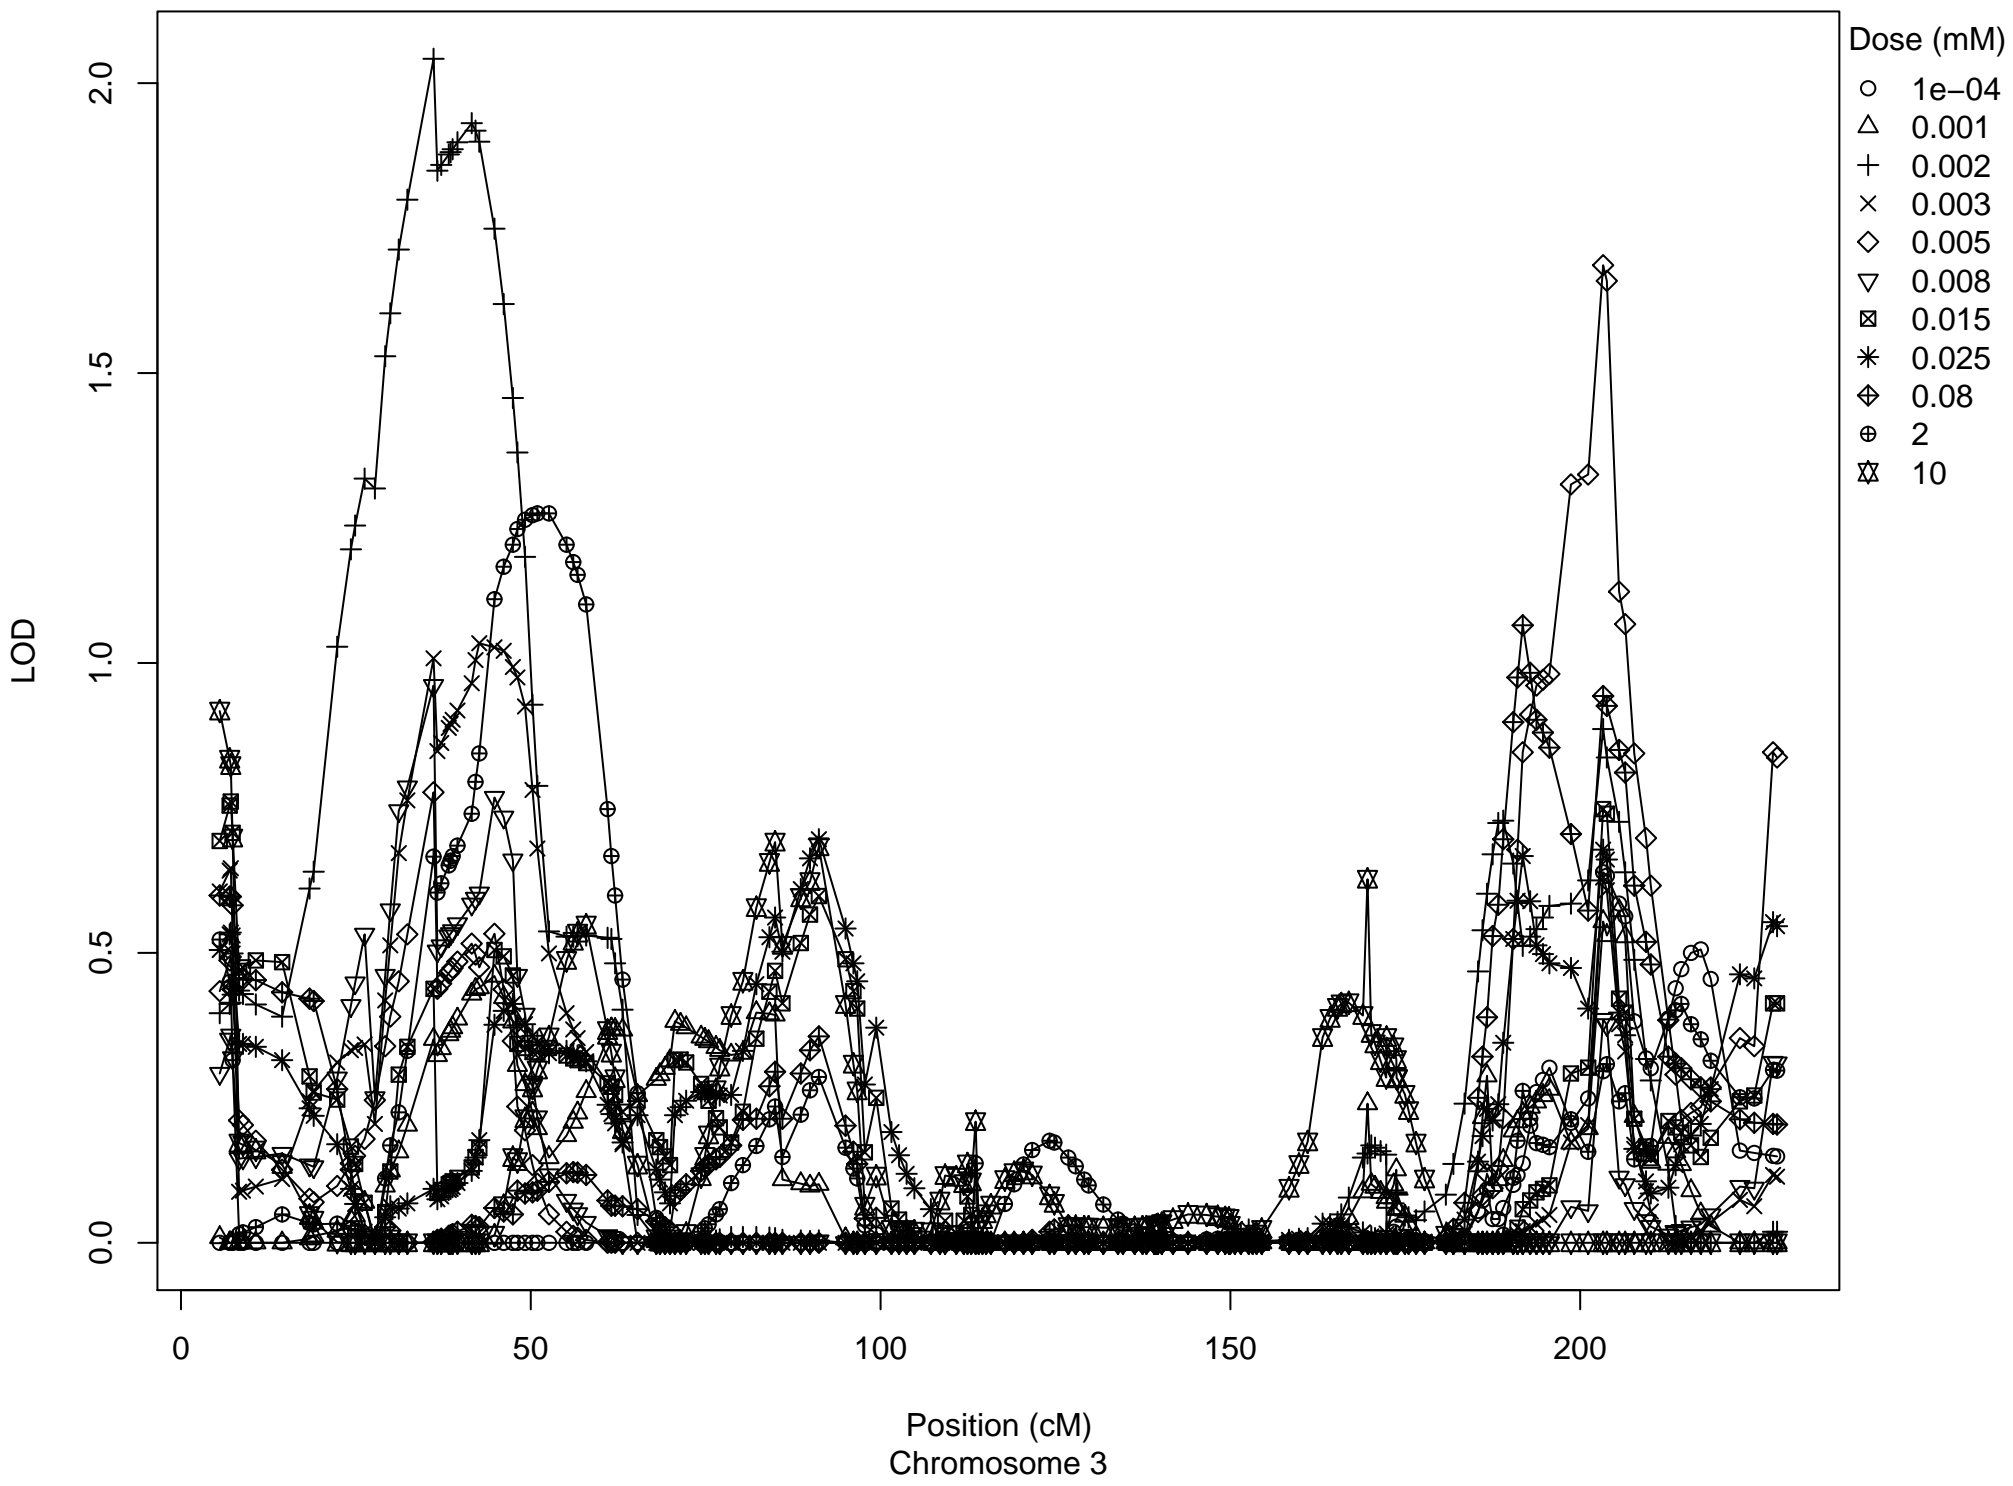

# 10-hydroxy-camptothecin (hCPT)

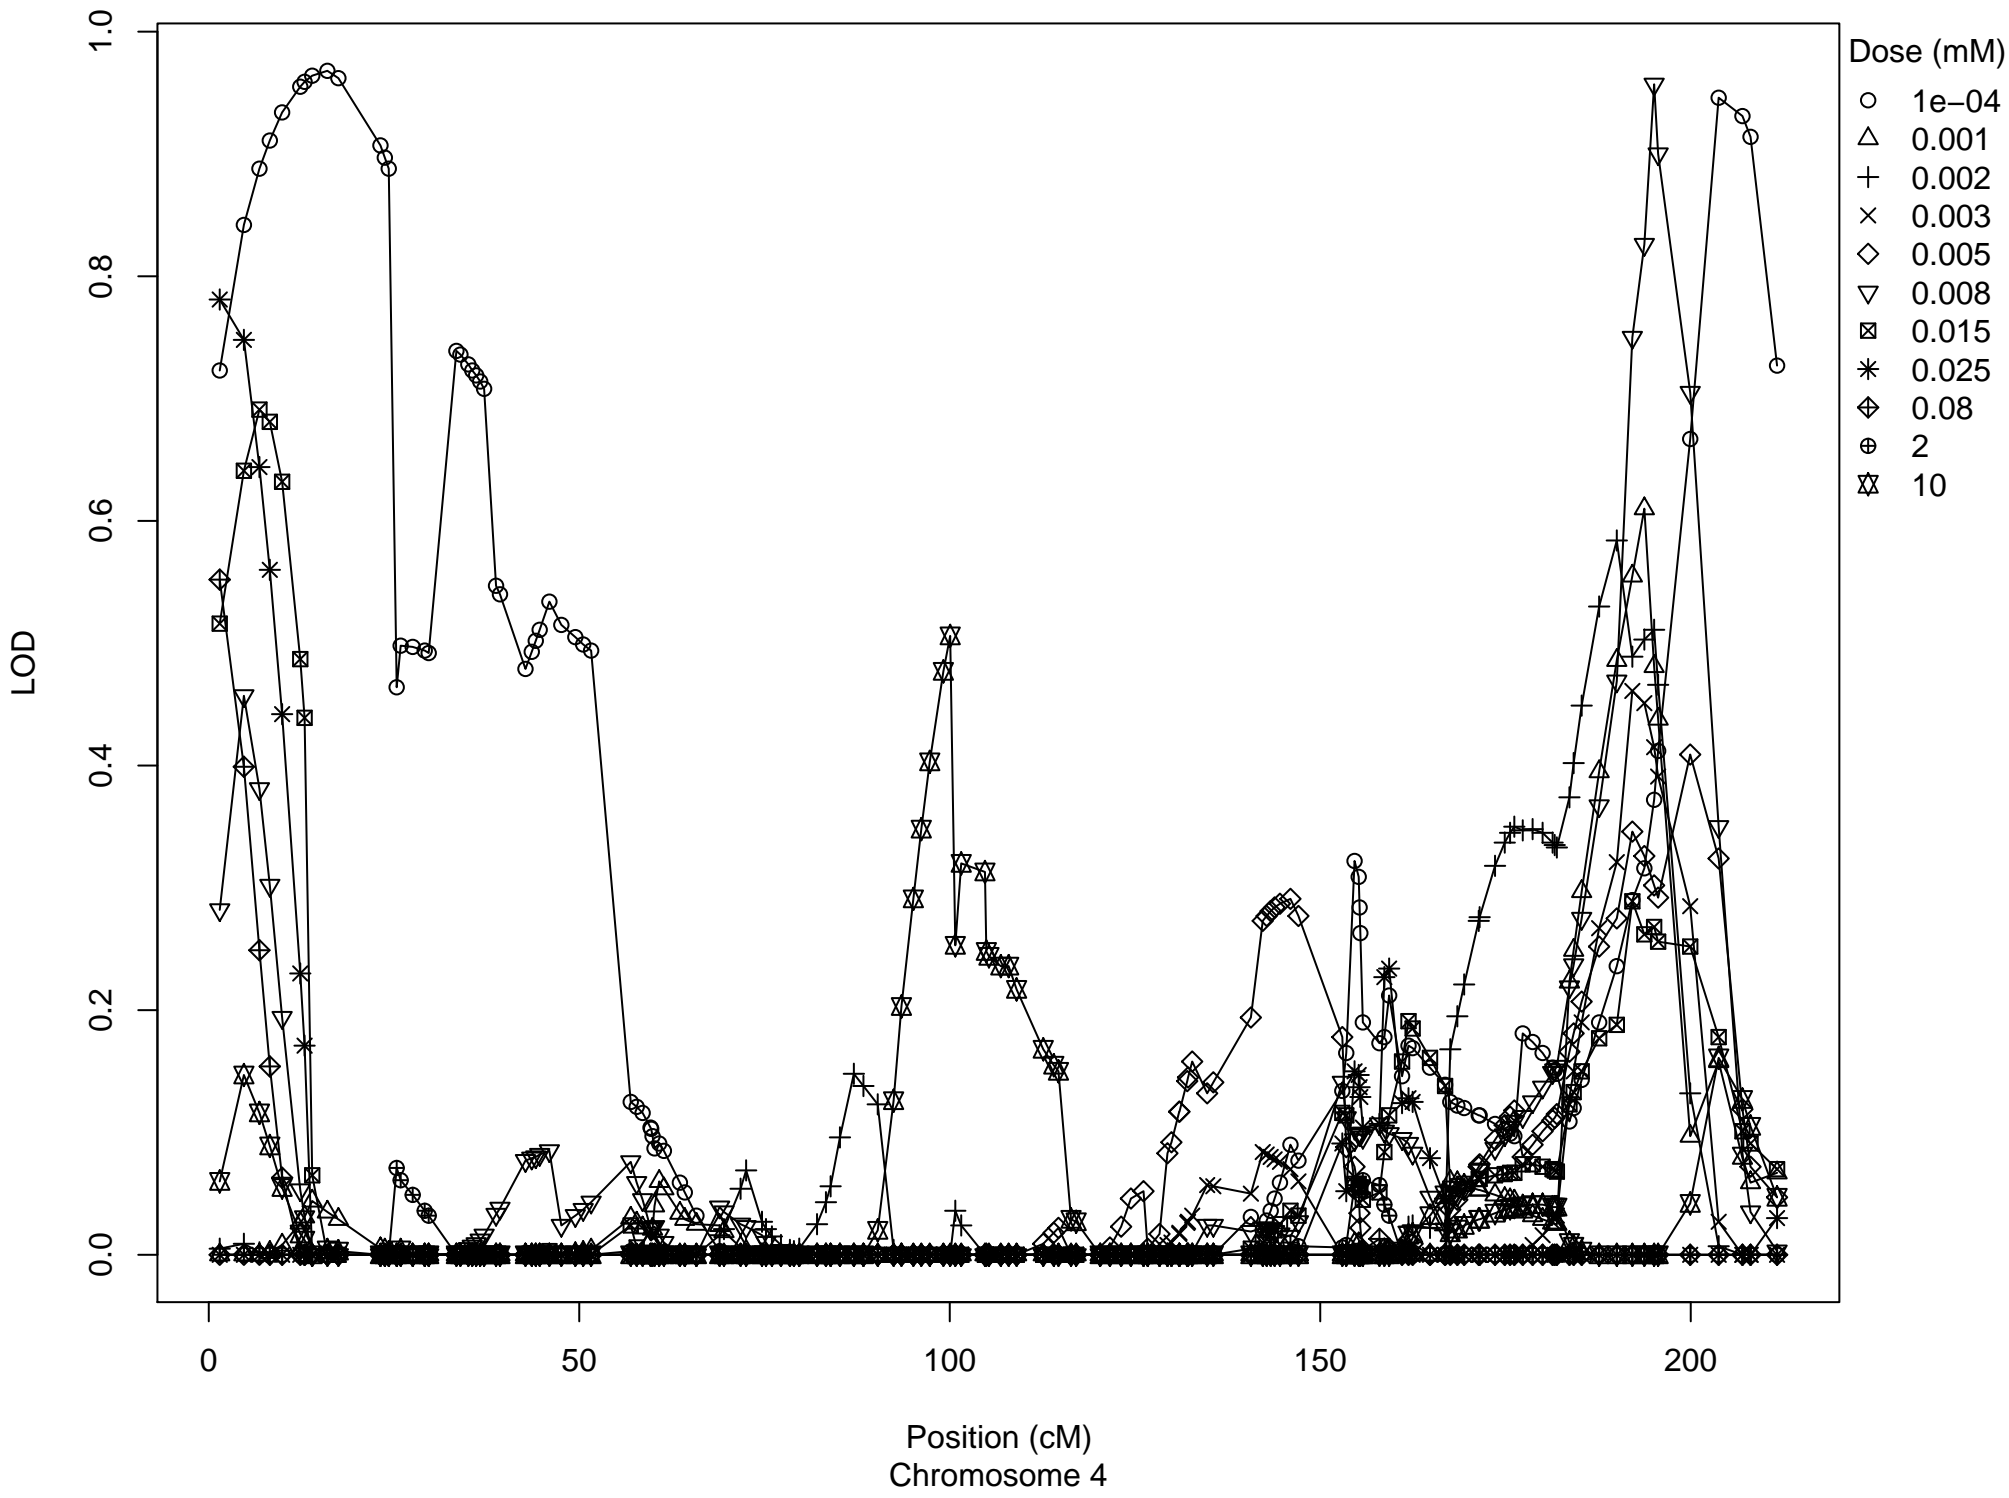







# 10-hydroxy-camptothecin (hCPT)

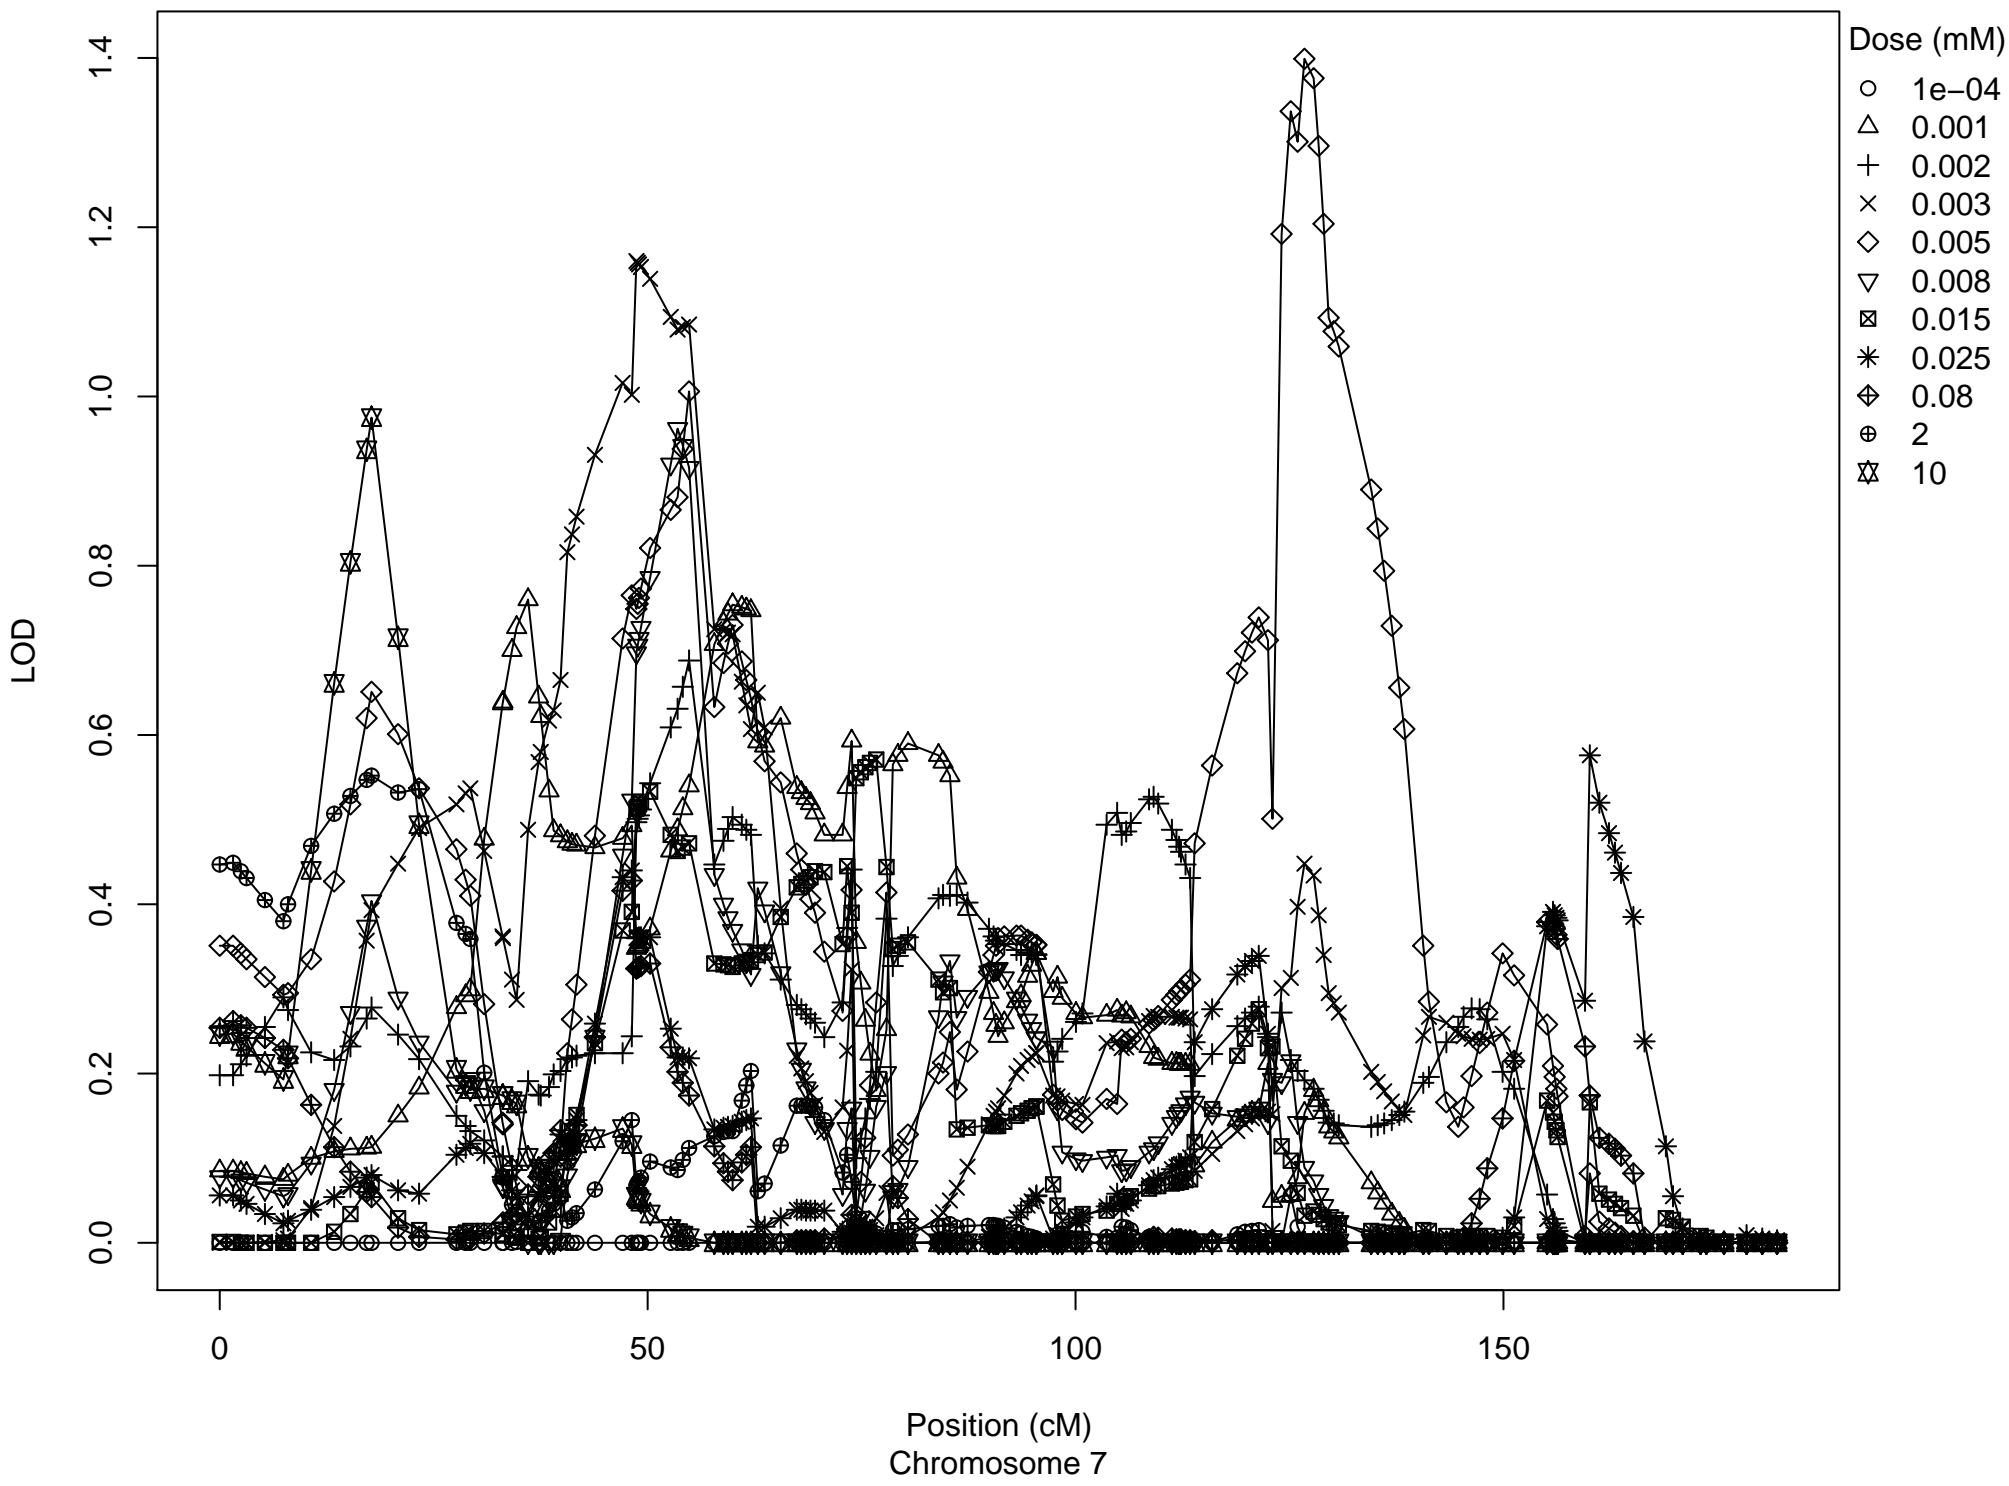

# 10-hydroxy-camptothecin (hCPT)

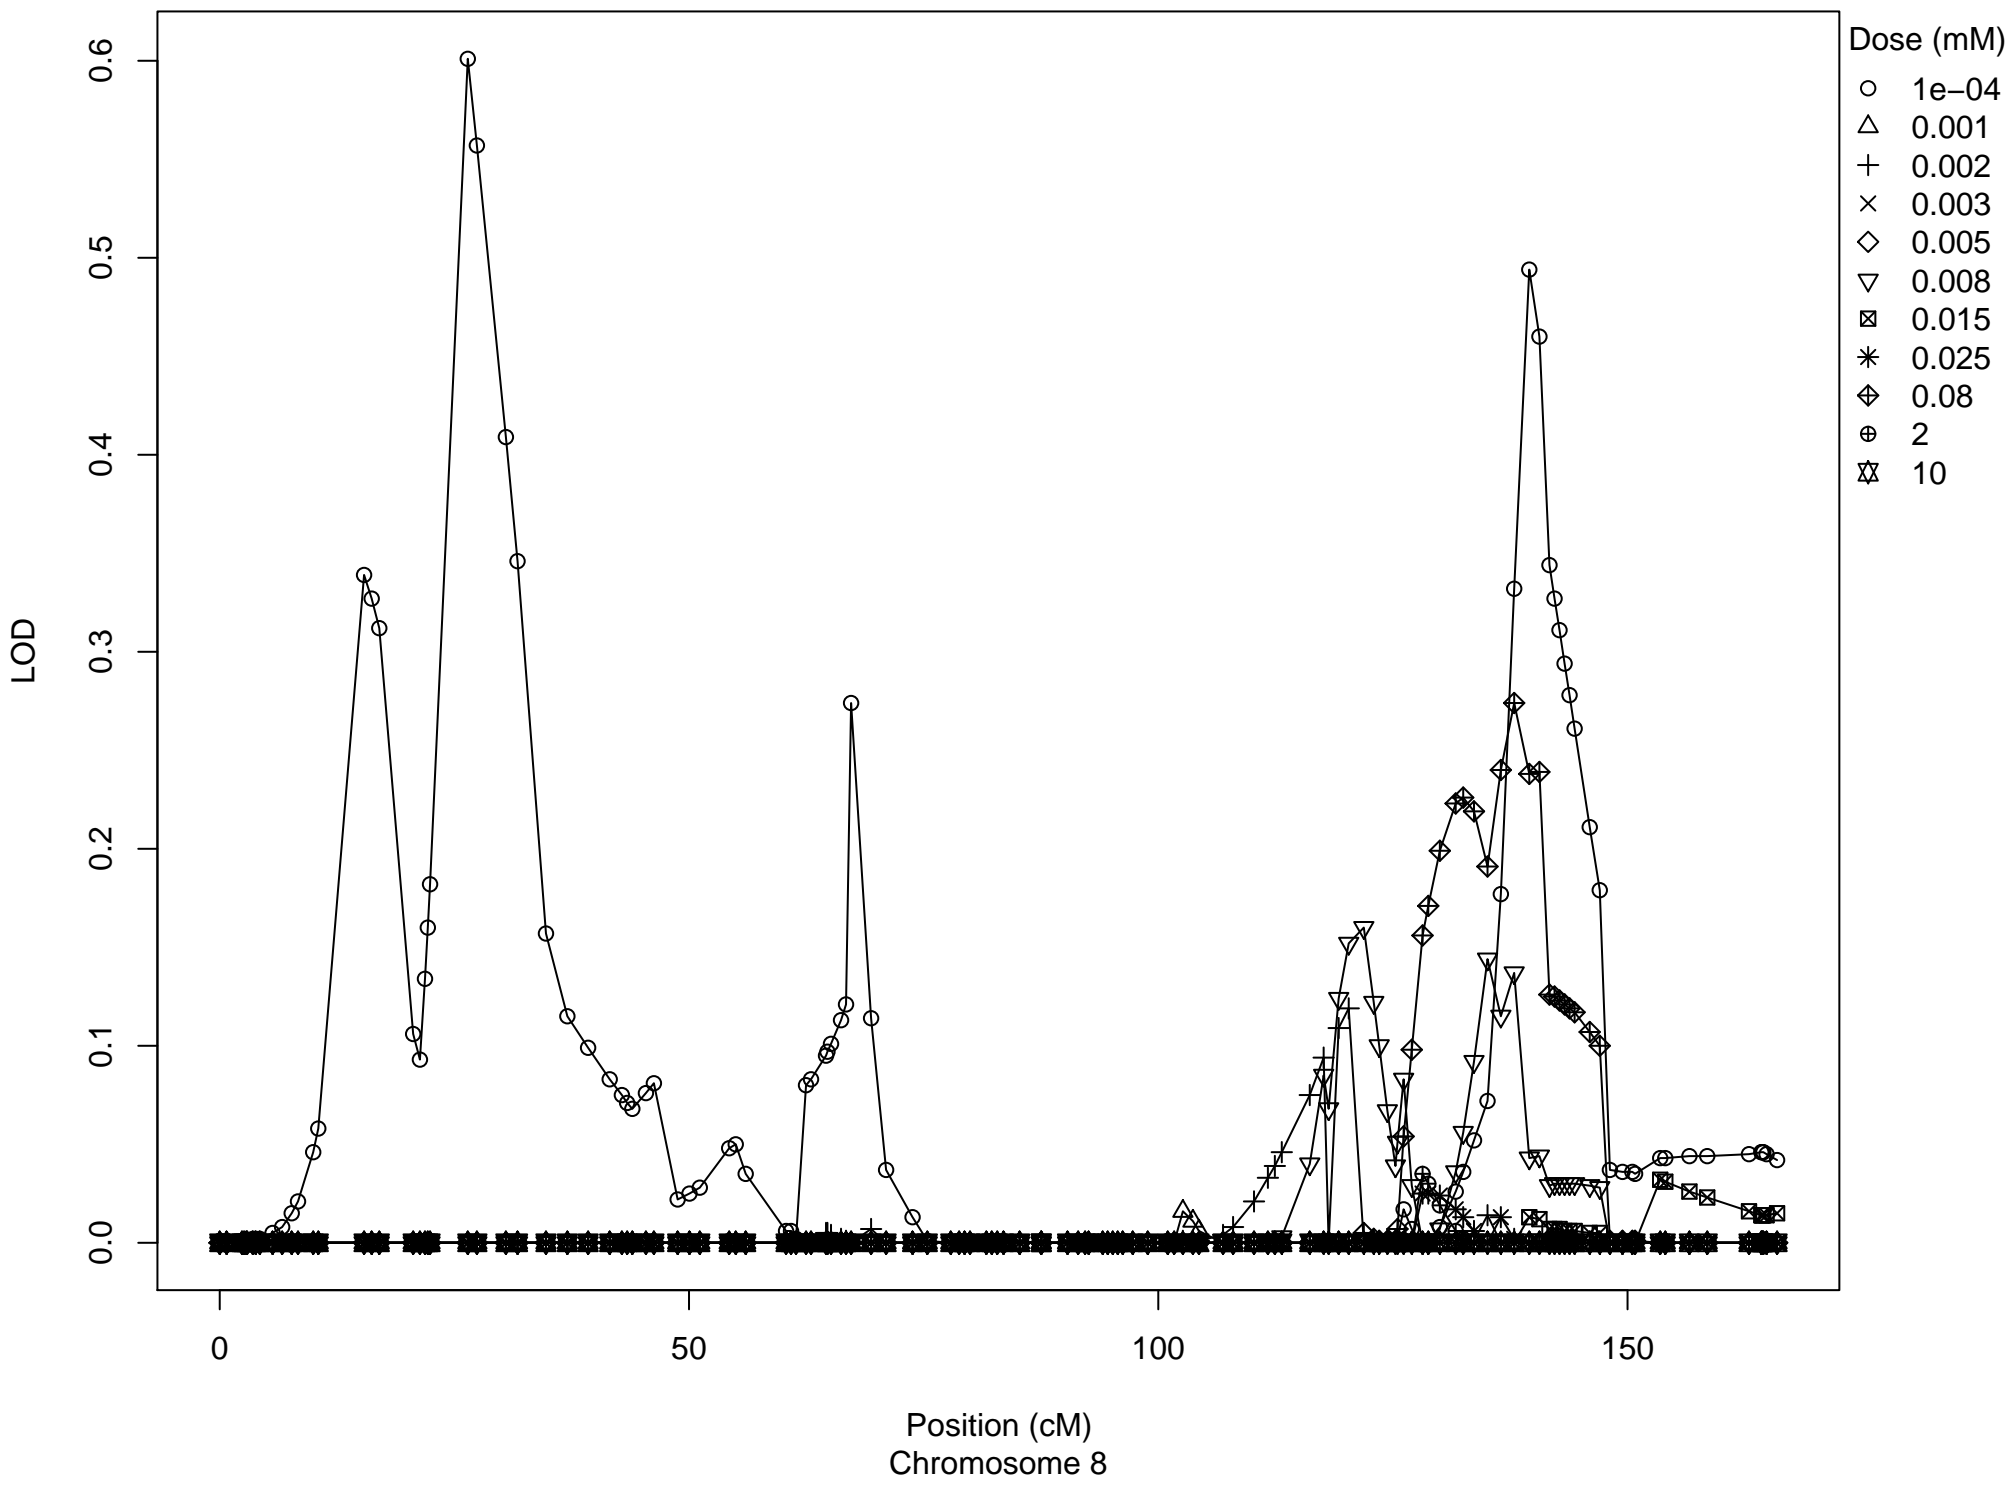

# 10-hydroxy-camptothecin (hCPT)

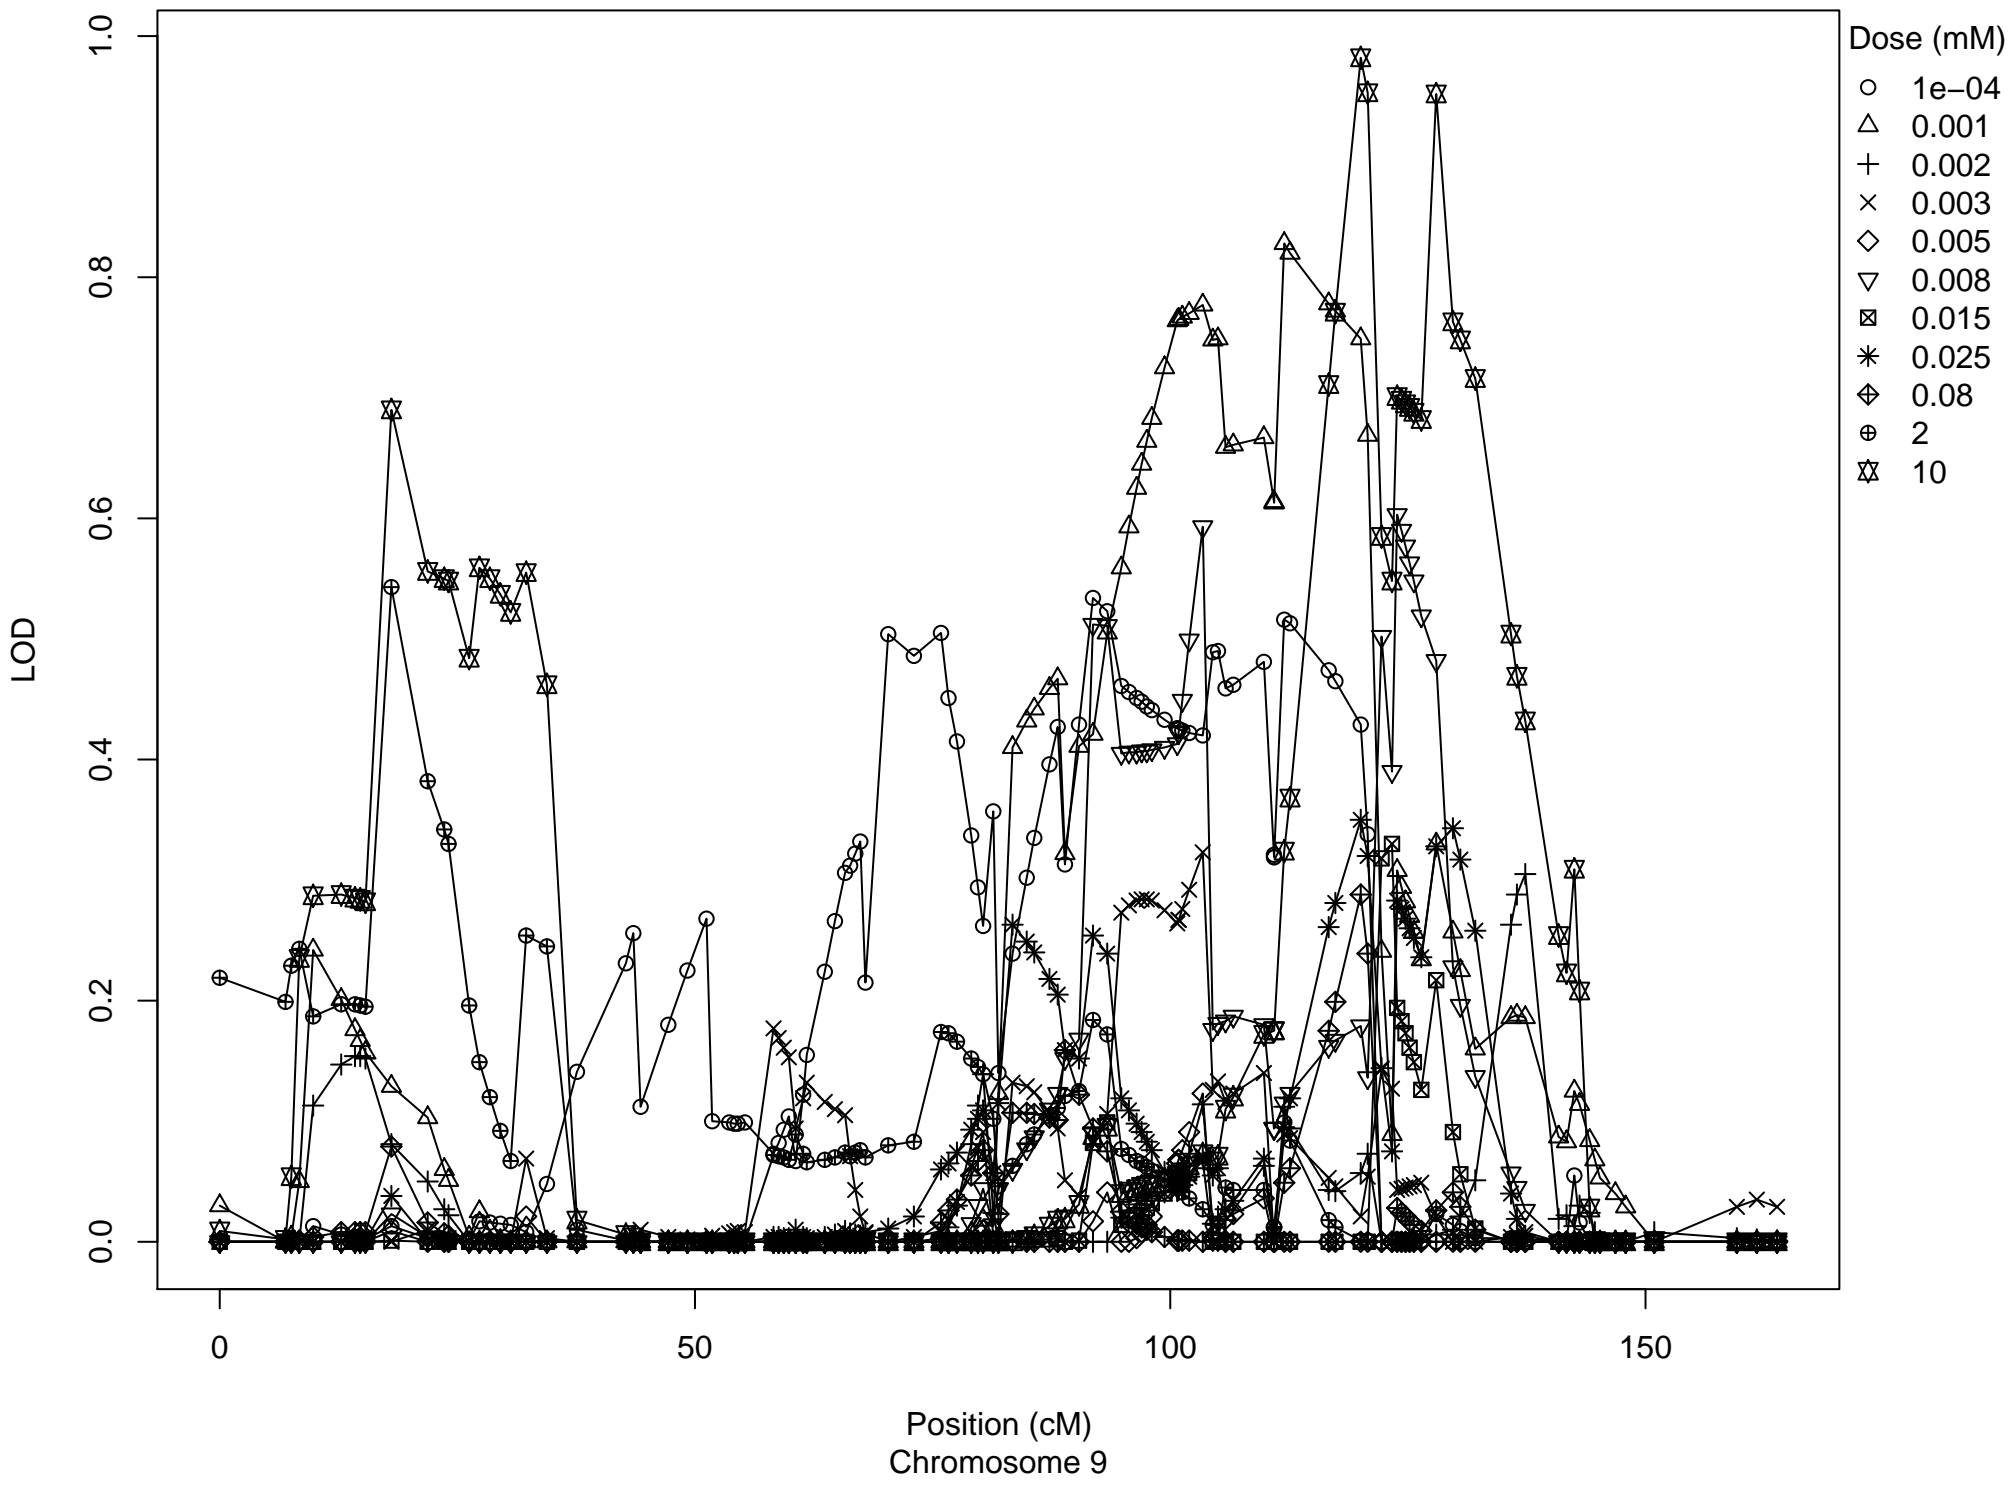

# 10-hydroxy-camptothecin (hCPT)

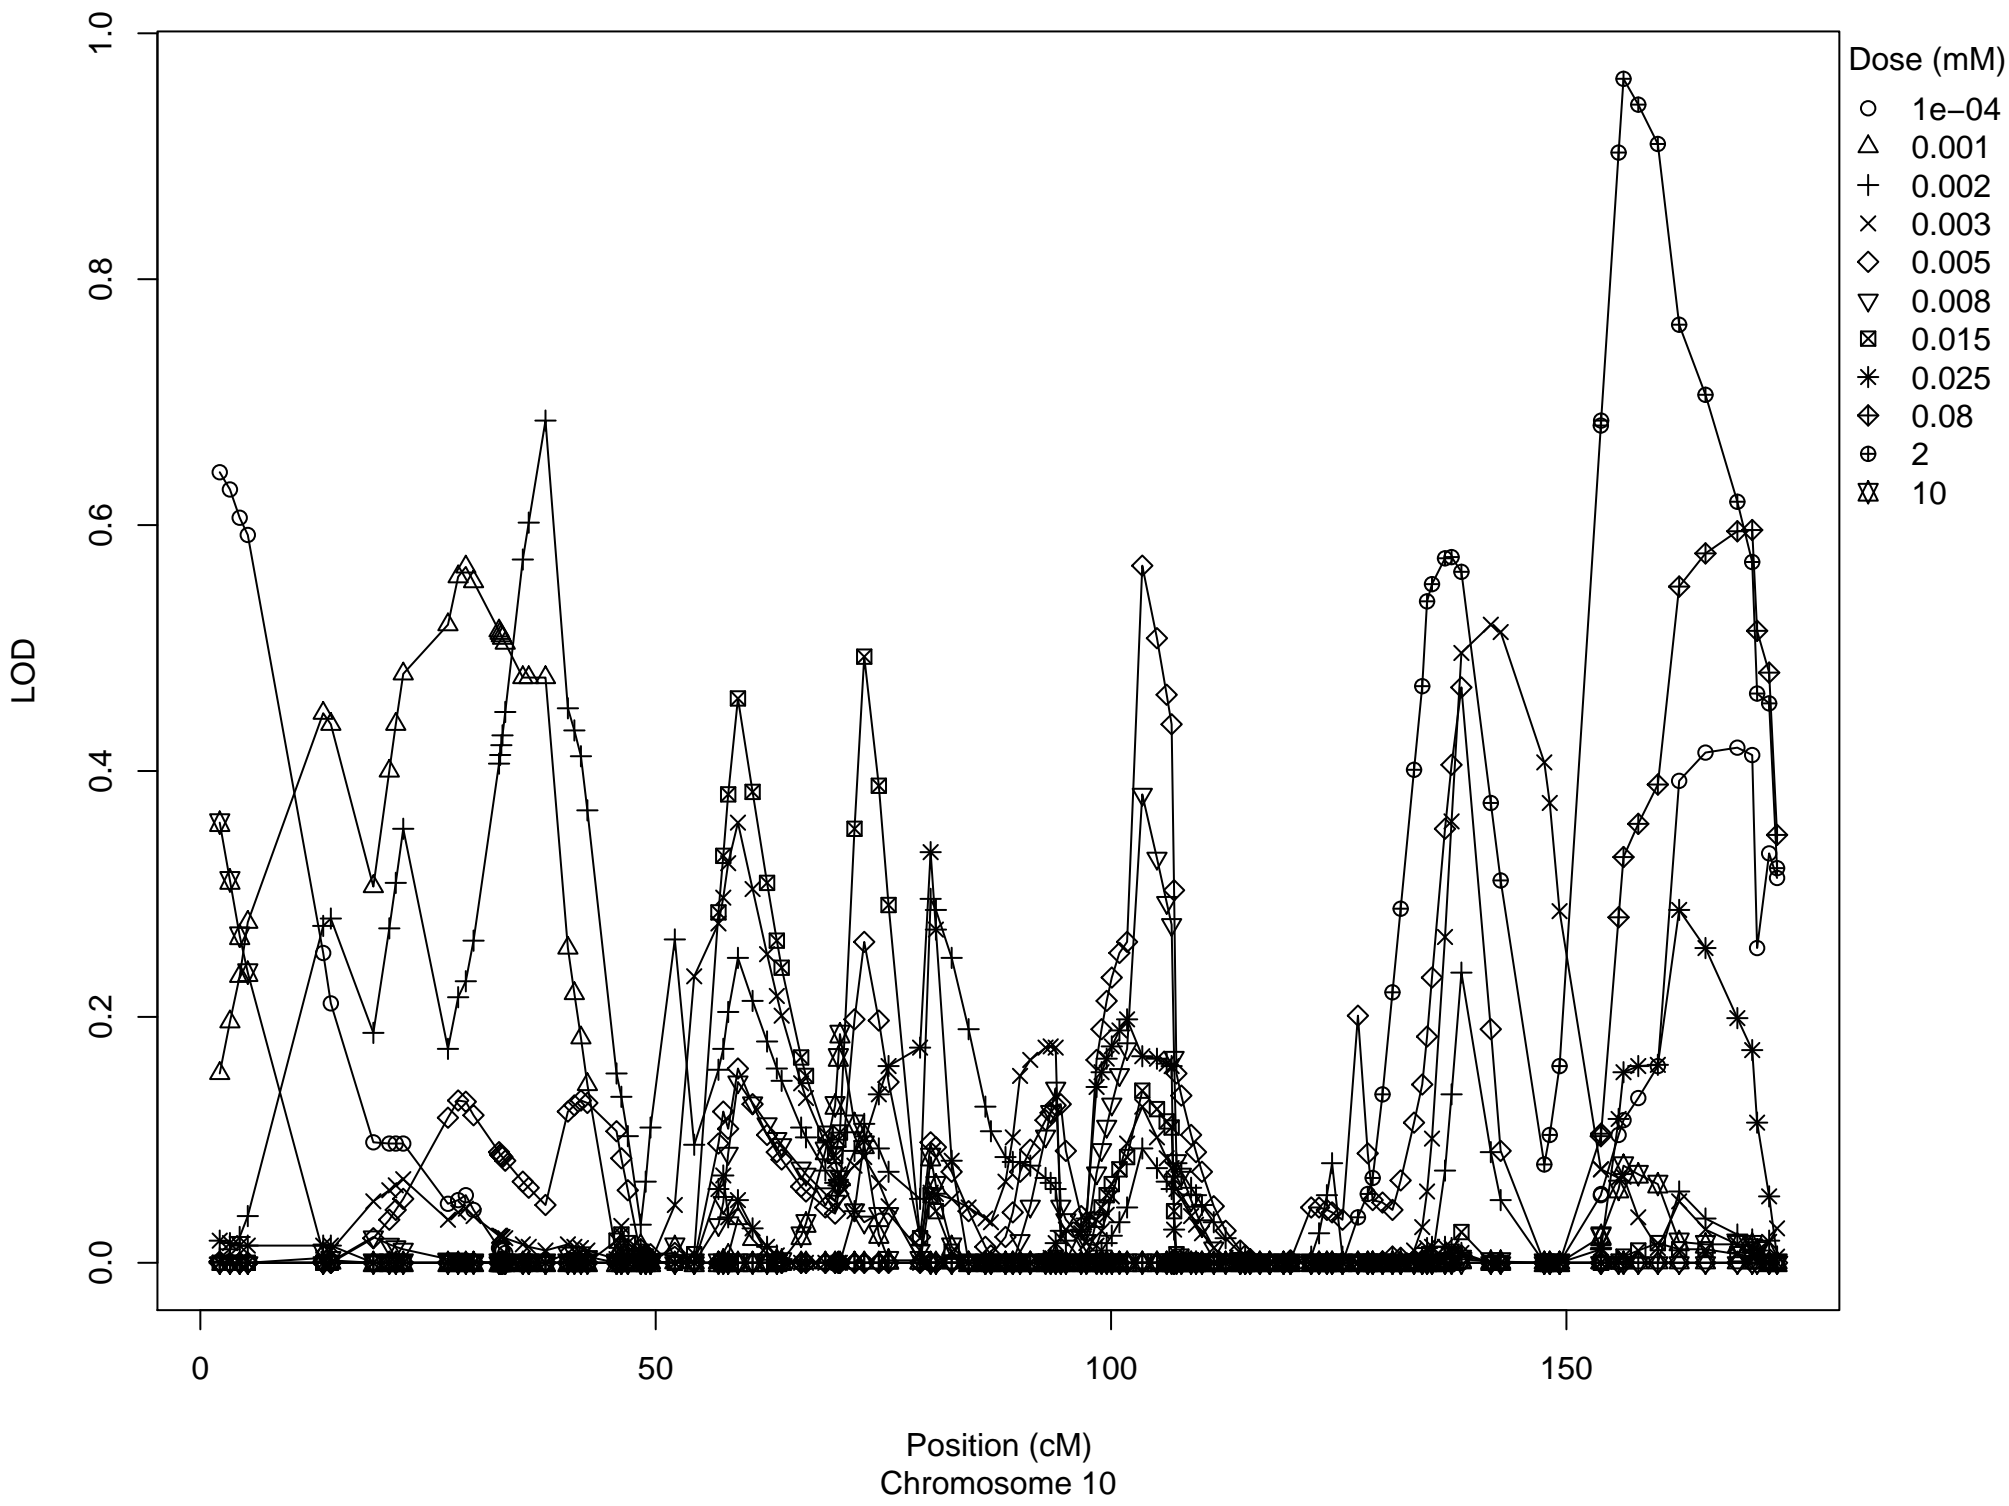

# 10-hydroxy-camptothecin (hCPT)

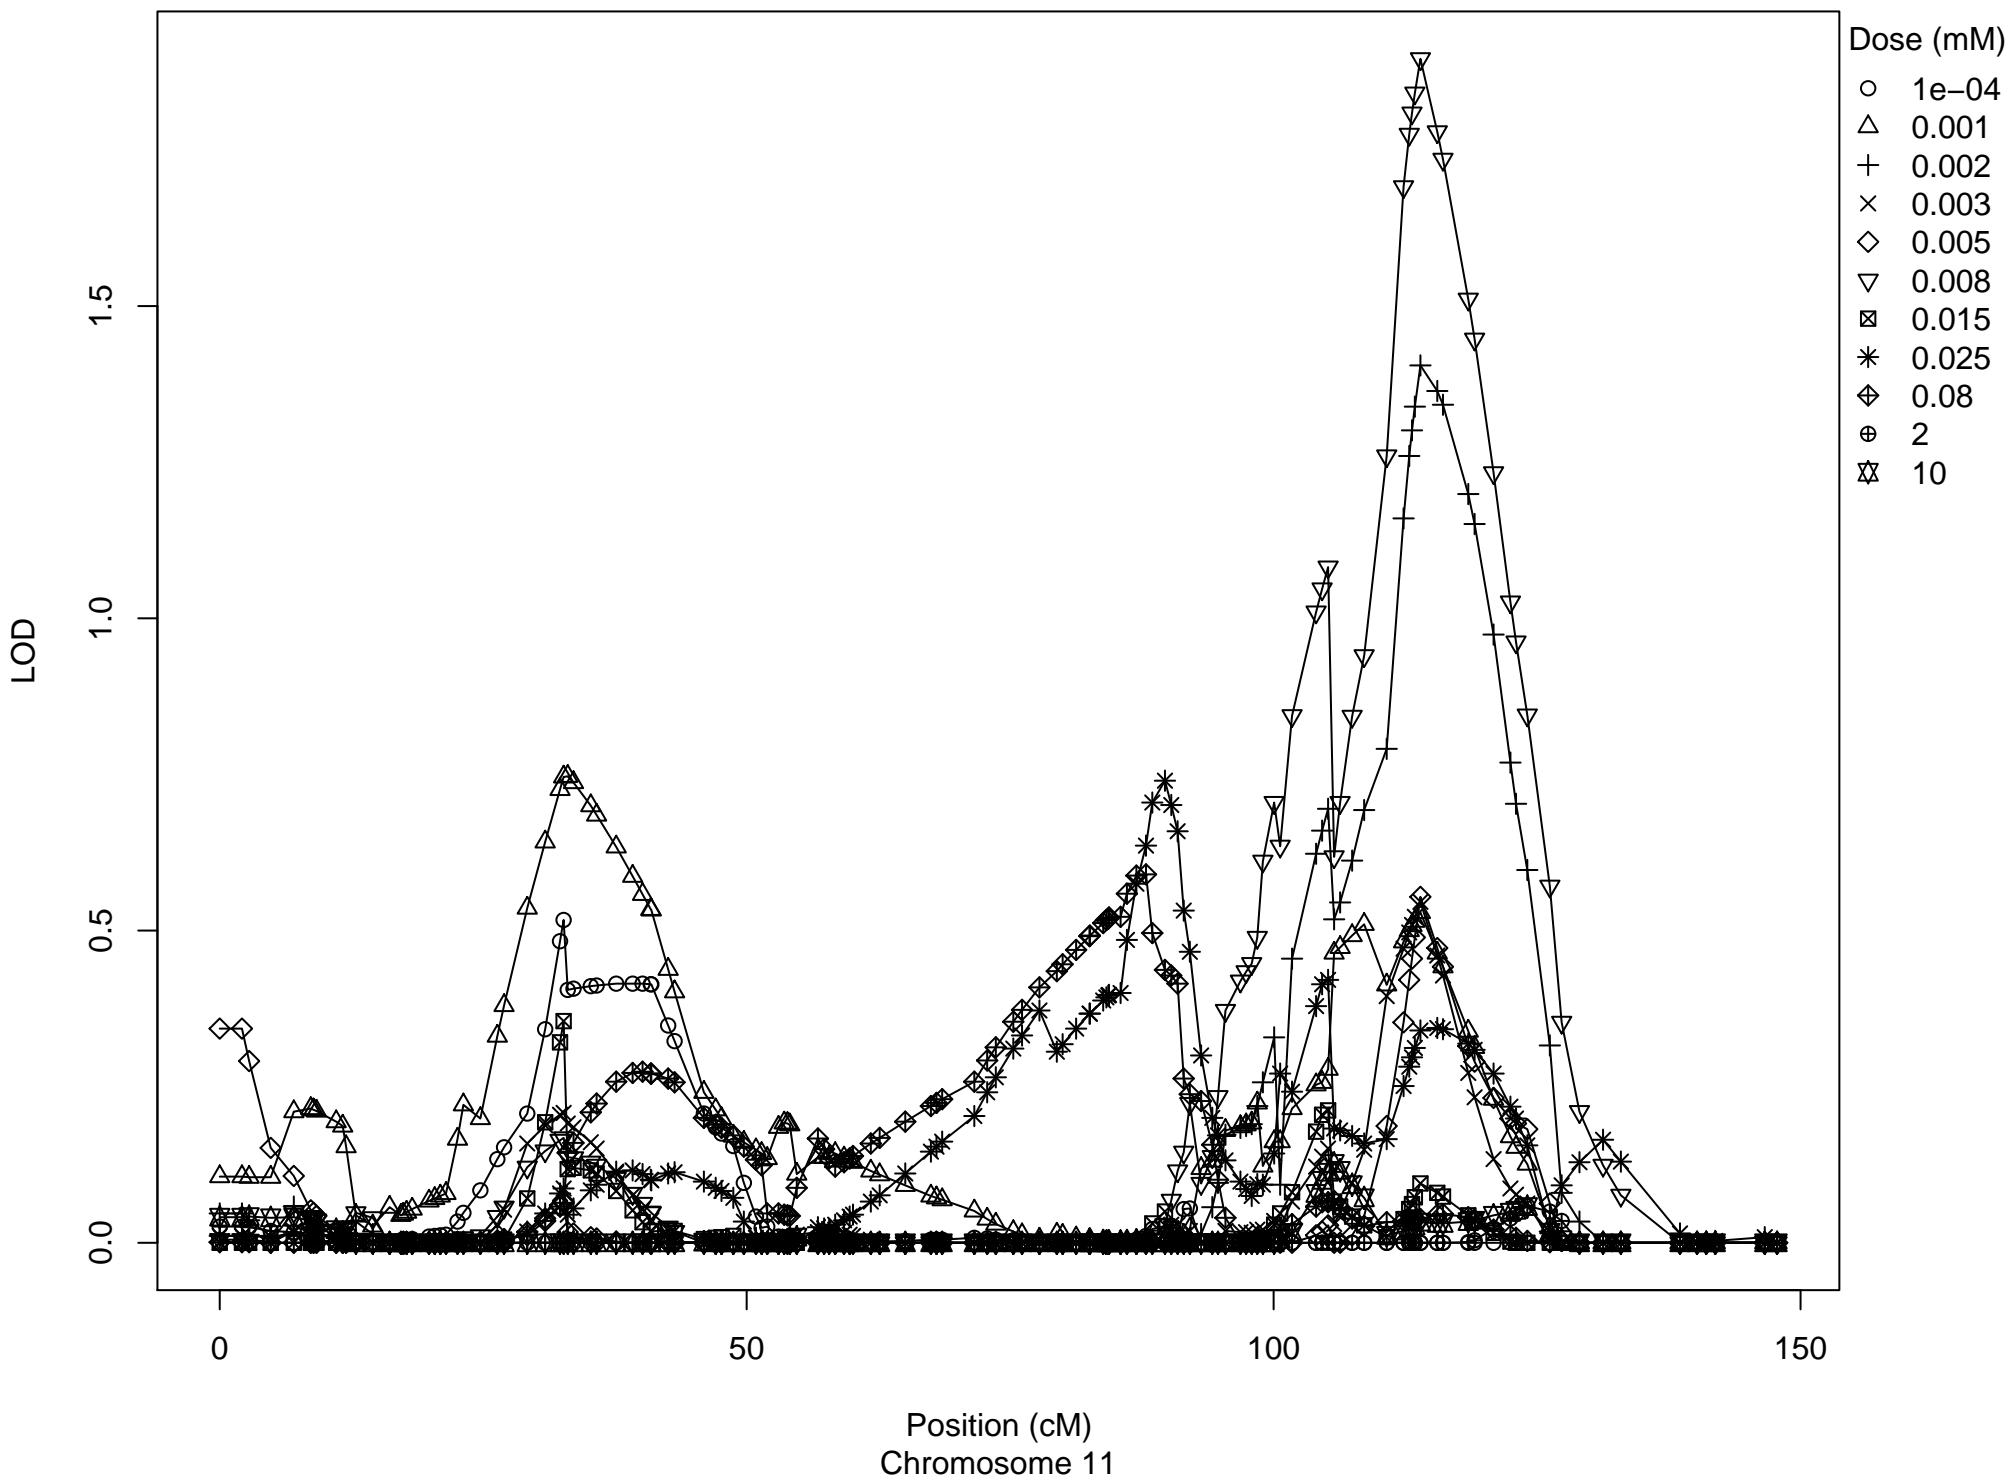

# 10-hydroxy-camptothecin (hCPT)

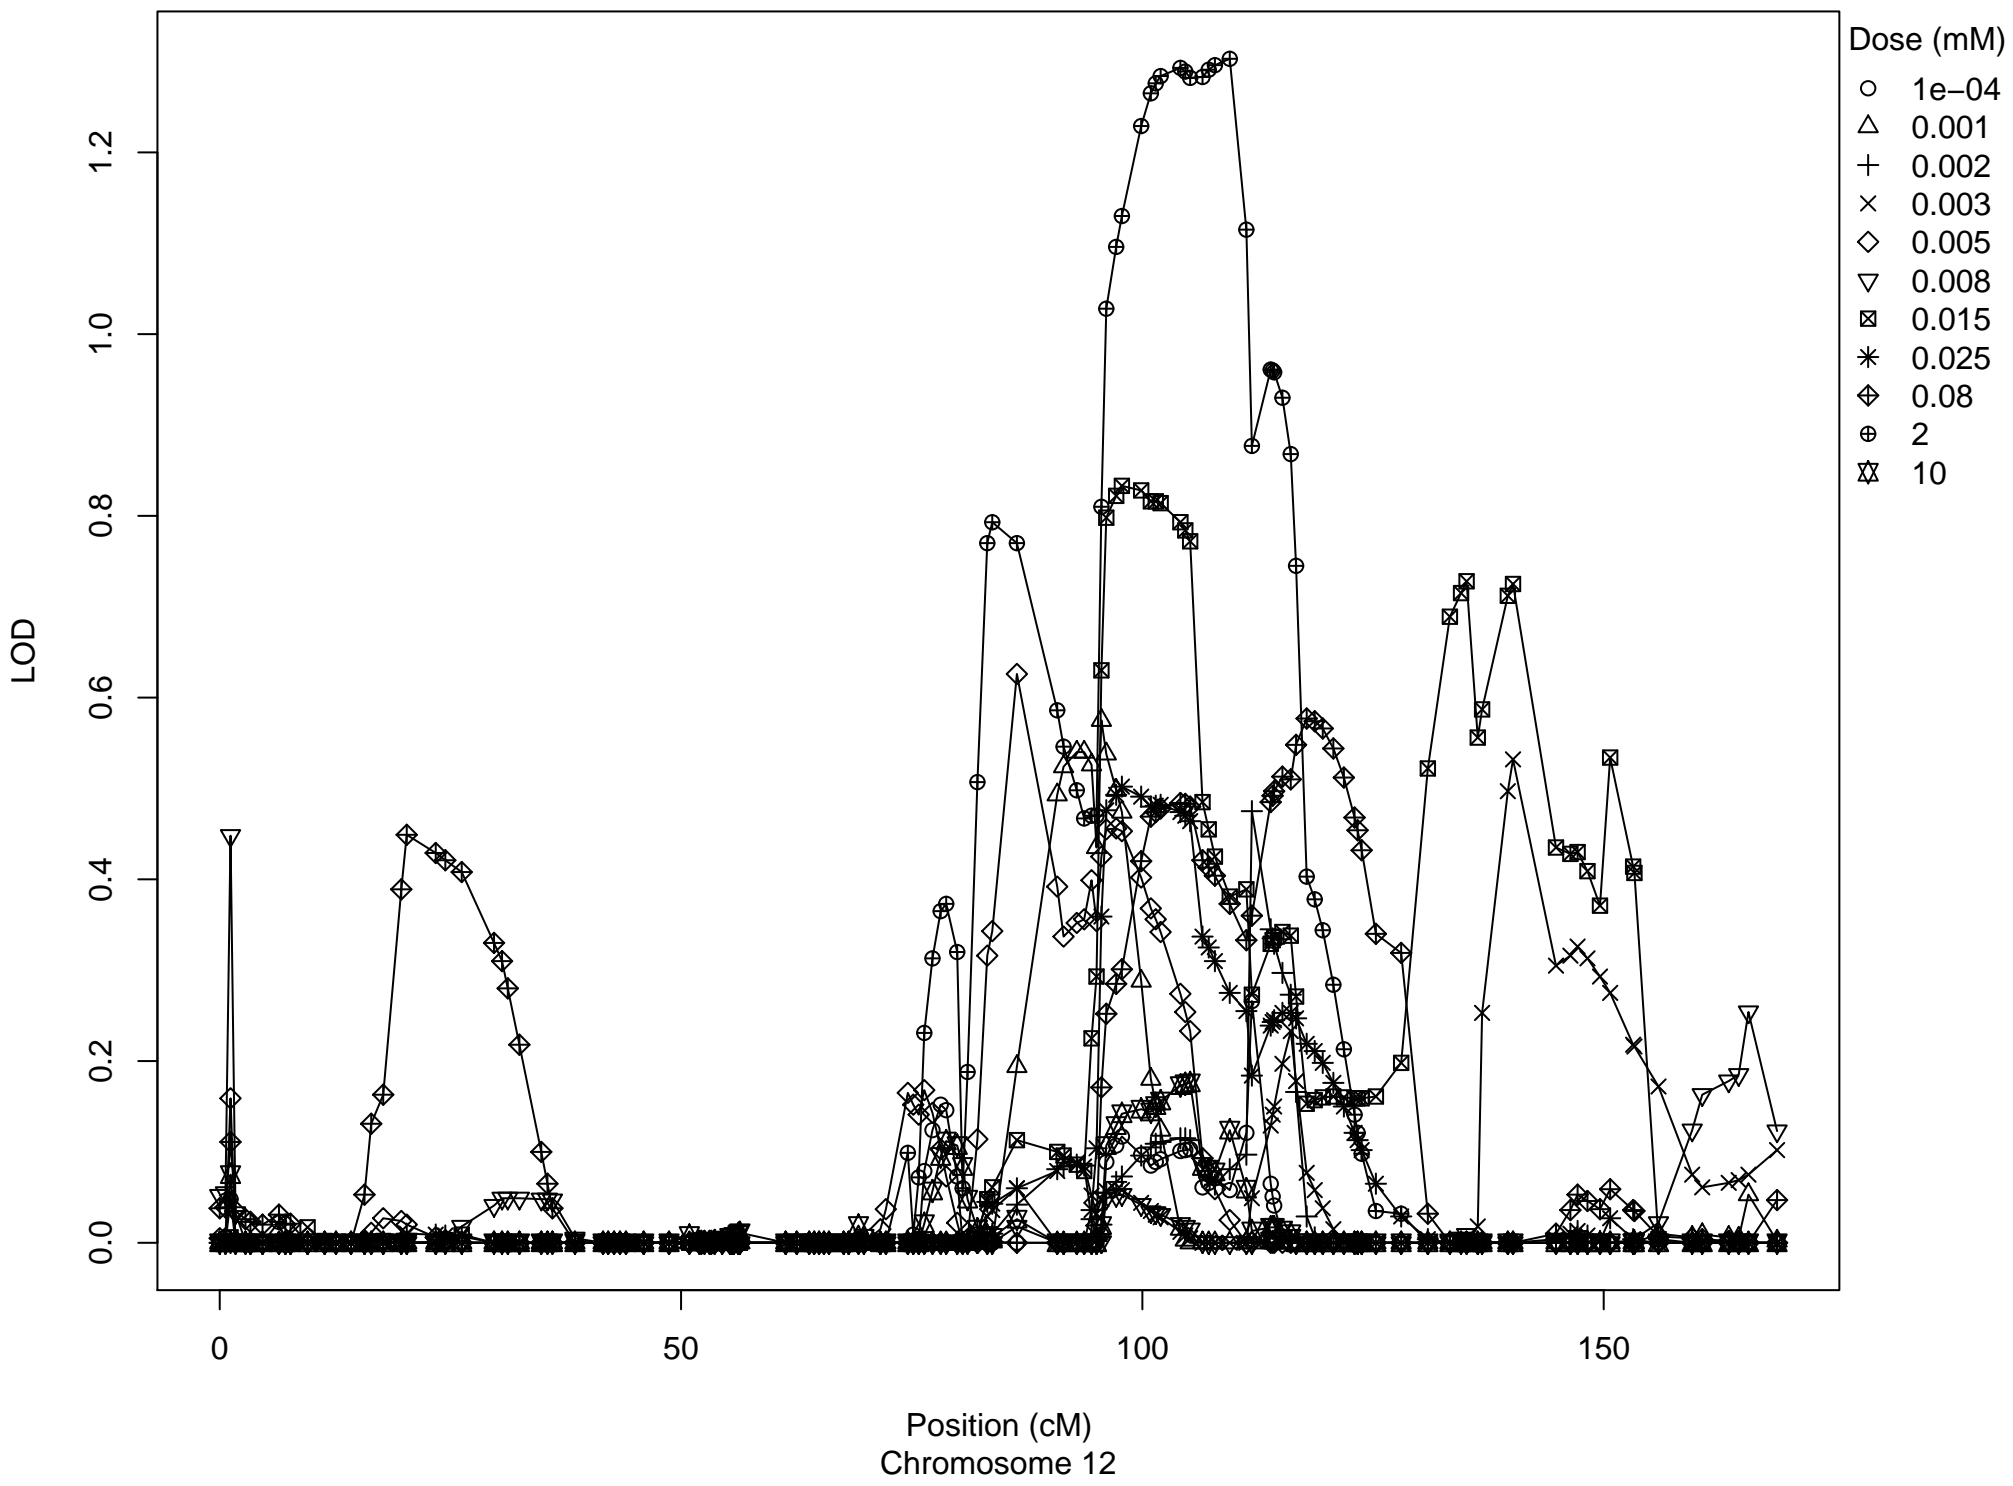



# 10-hydroxy-camptothecin (hCPT)

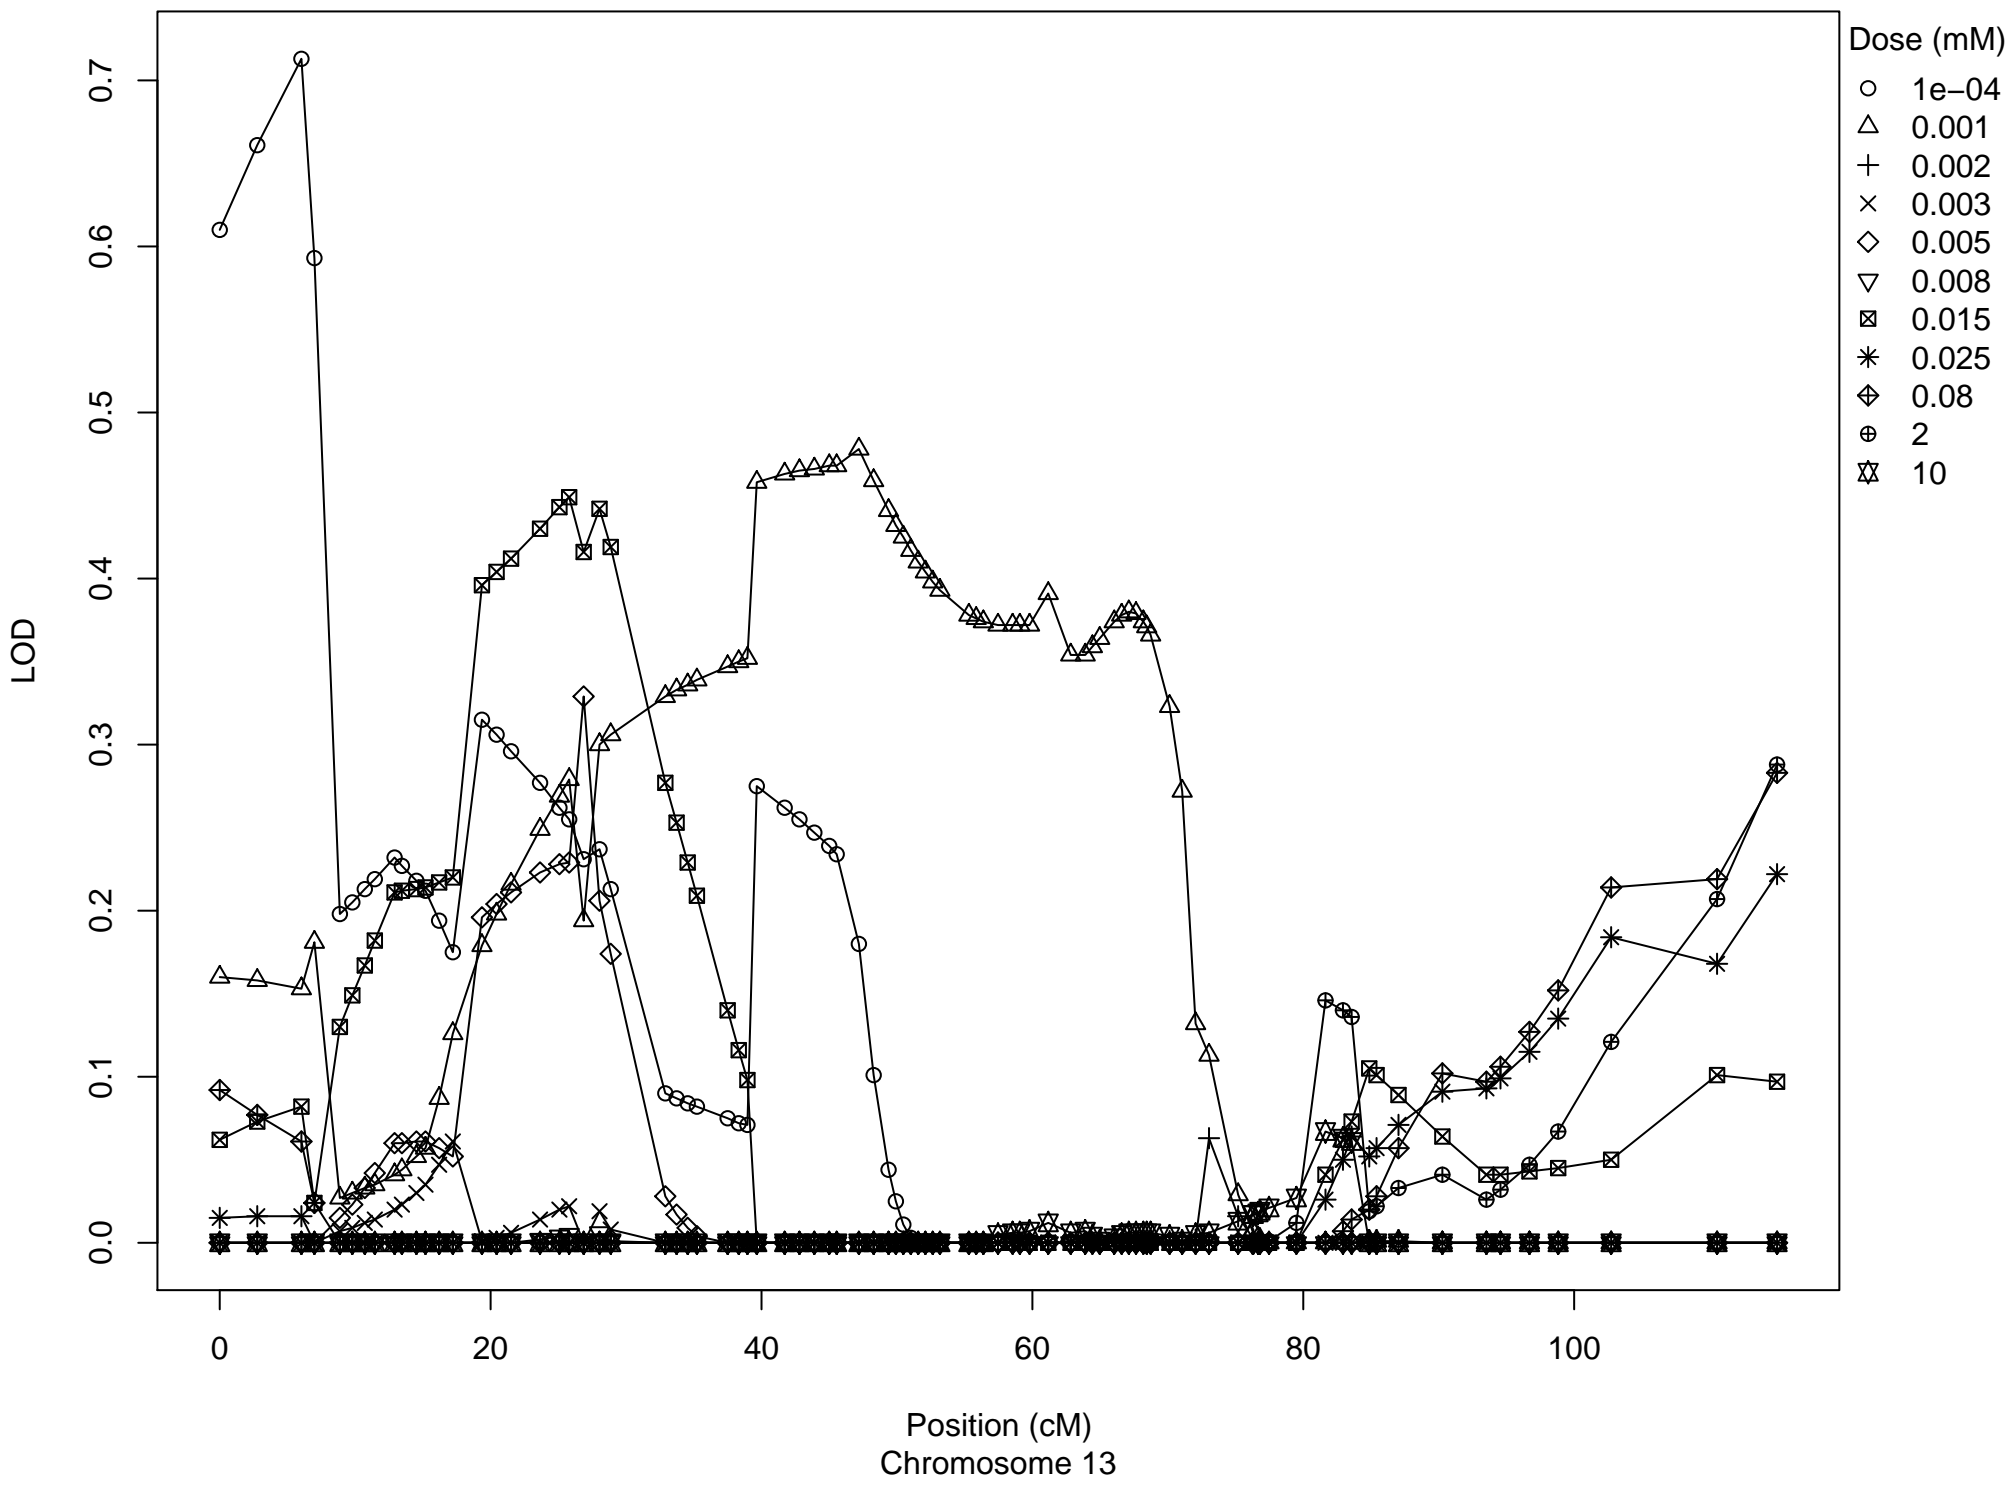

# 10-hydroxy-camptothecin (hCPT)

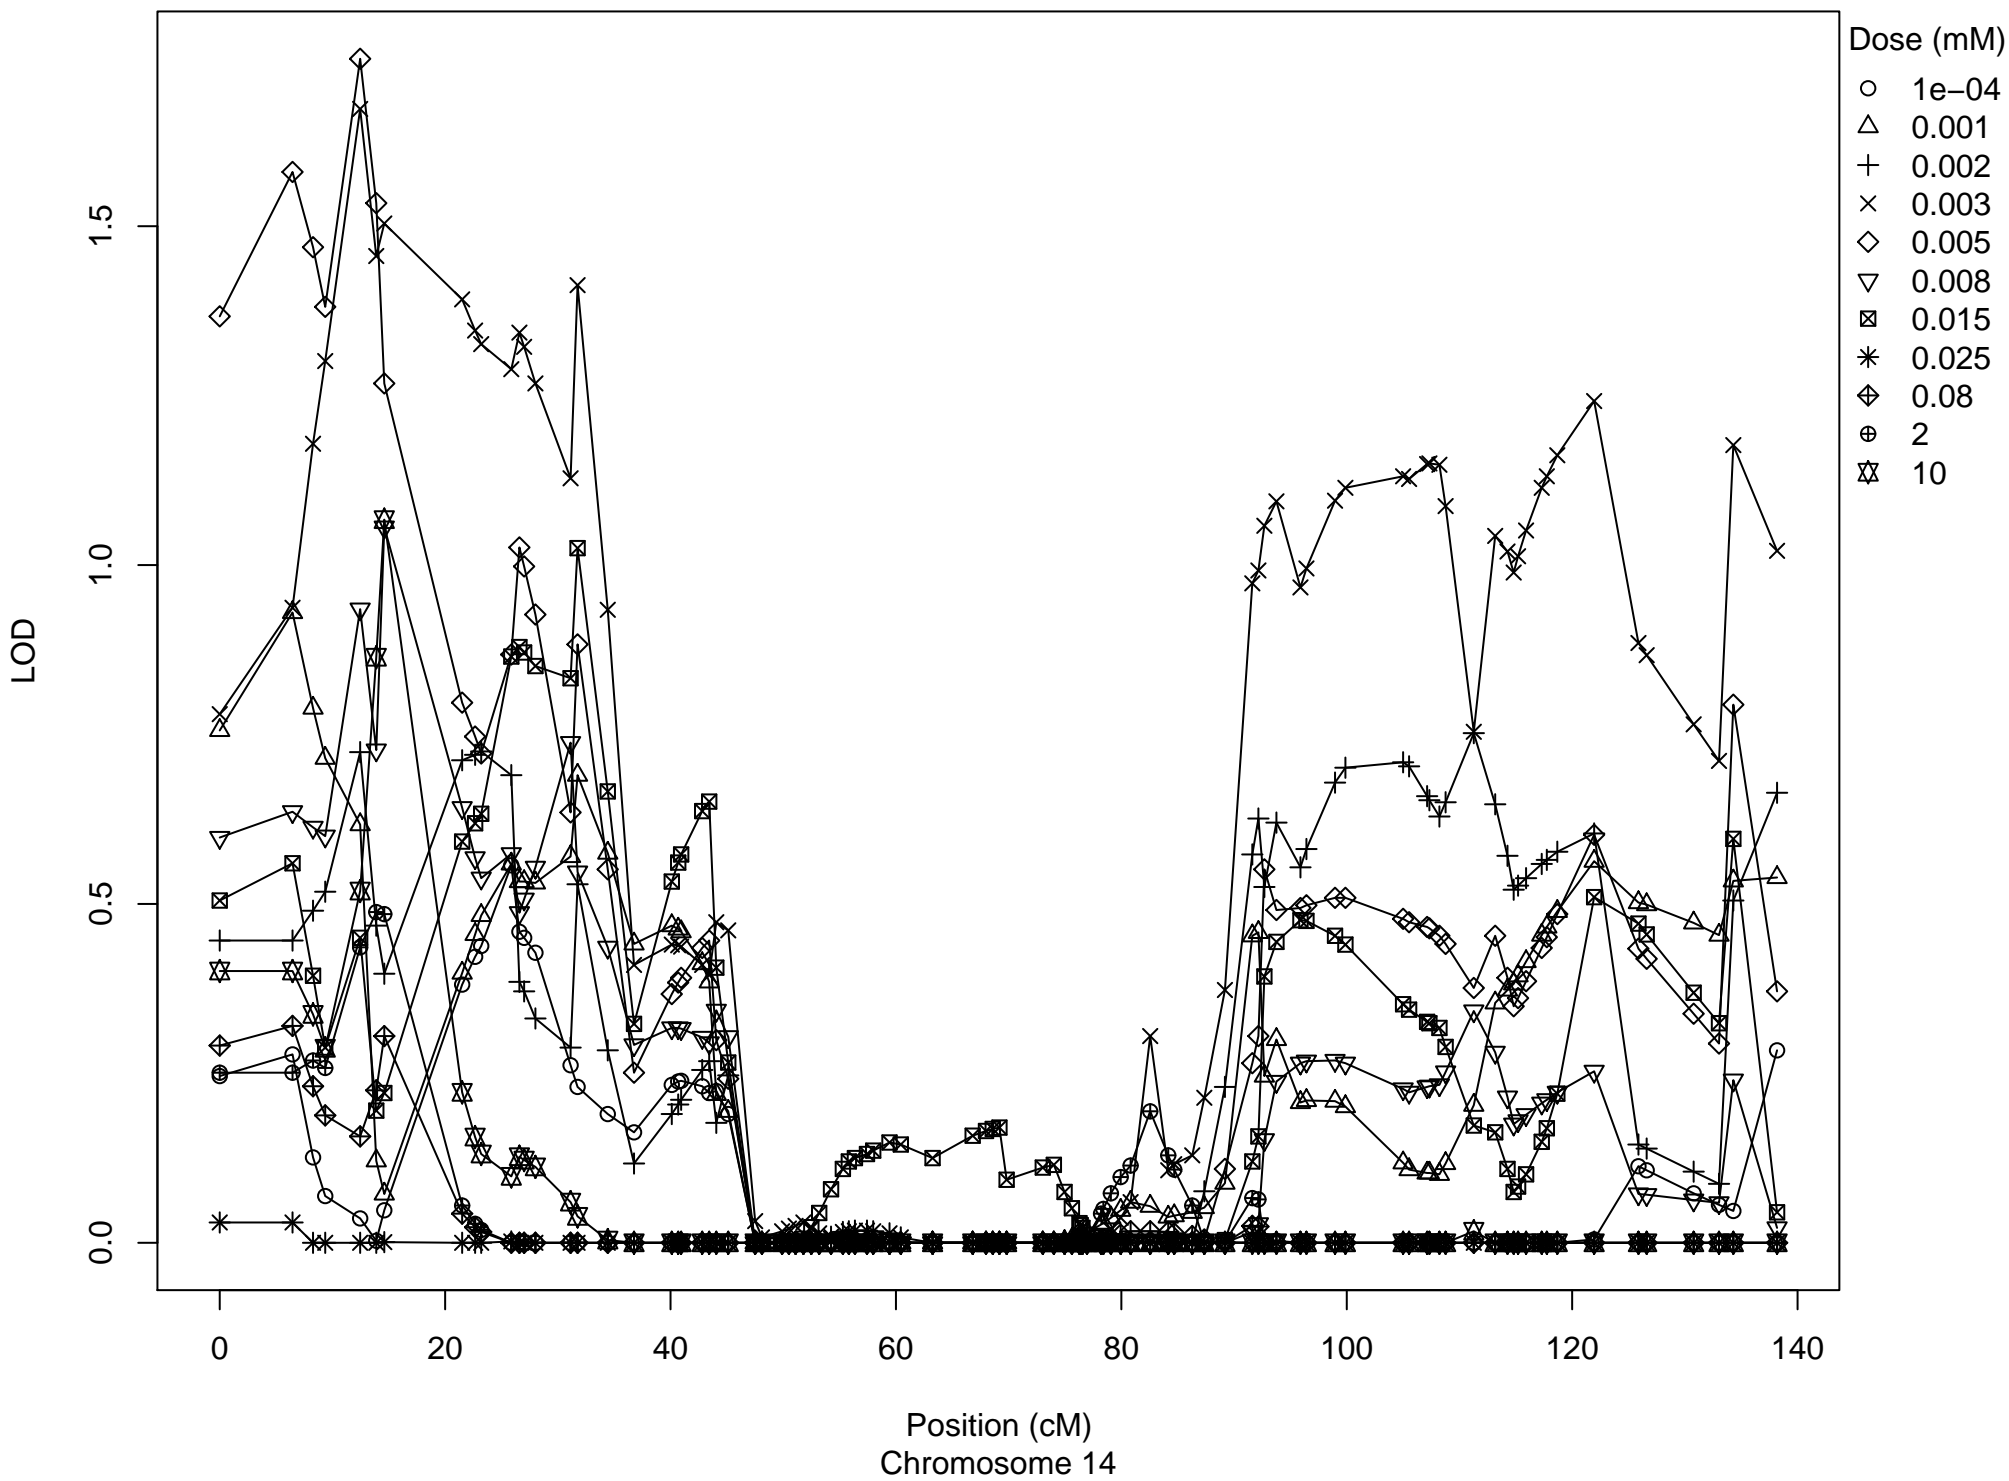

# 10-hydroxy-camptothecin (hCPT)

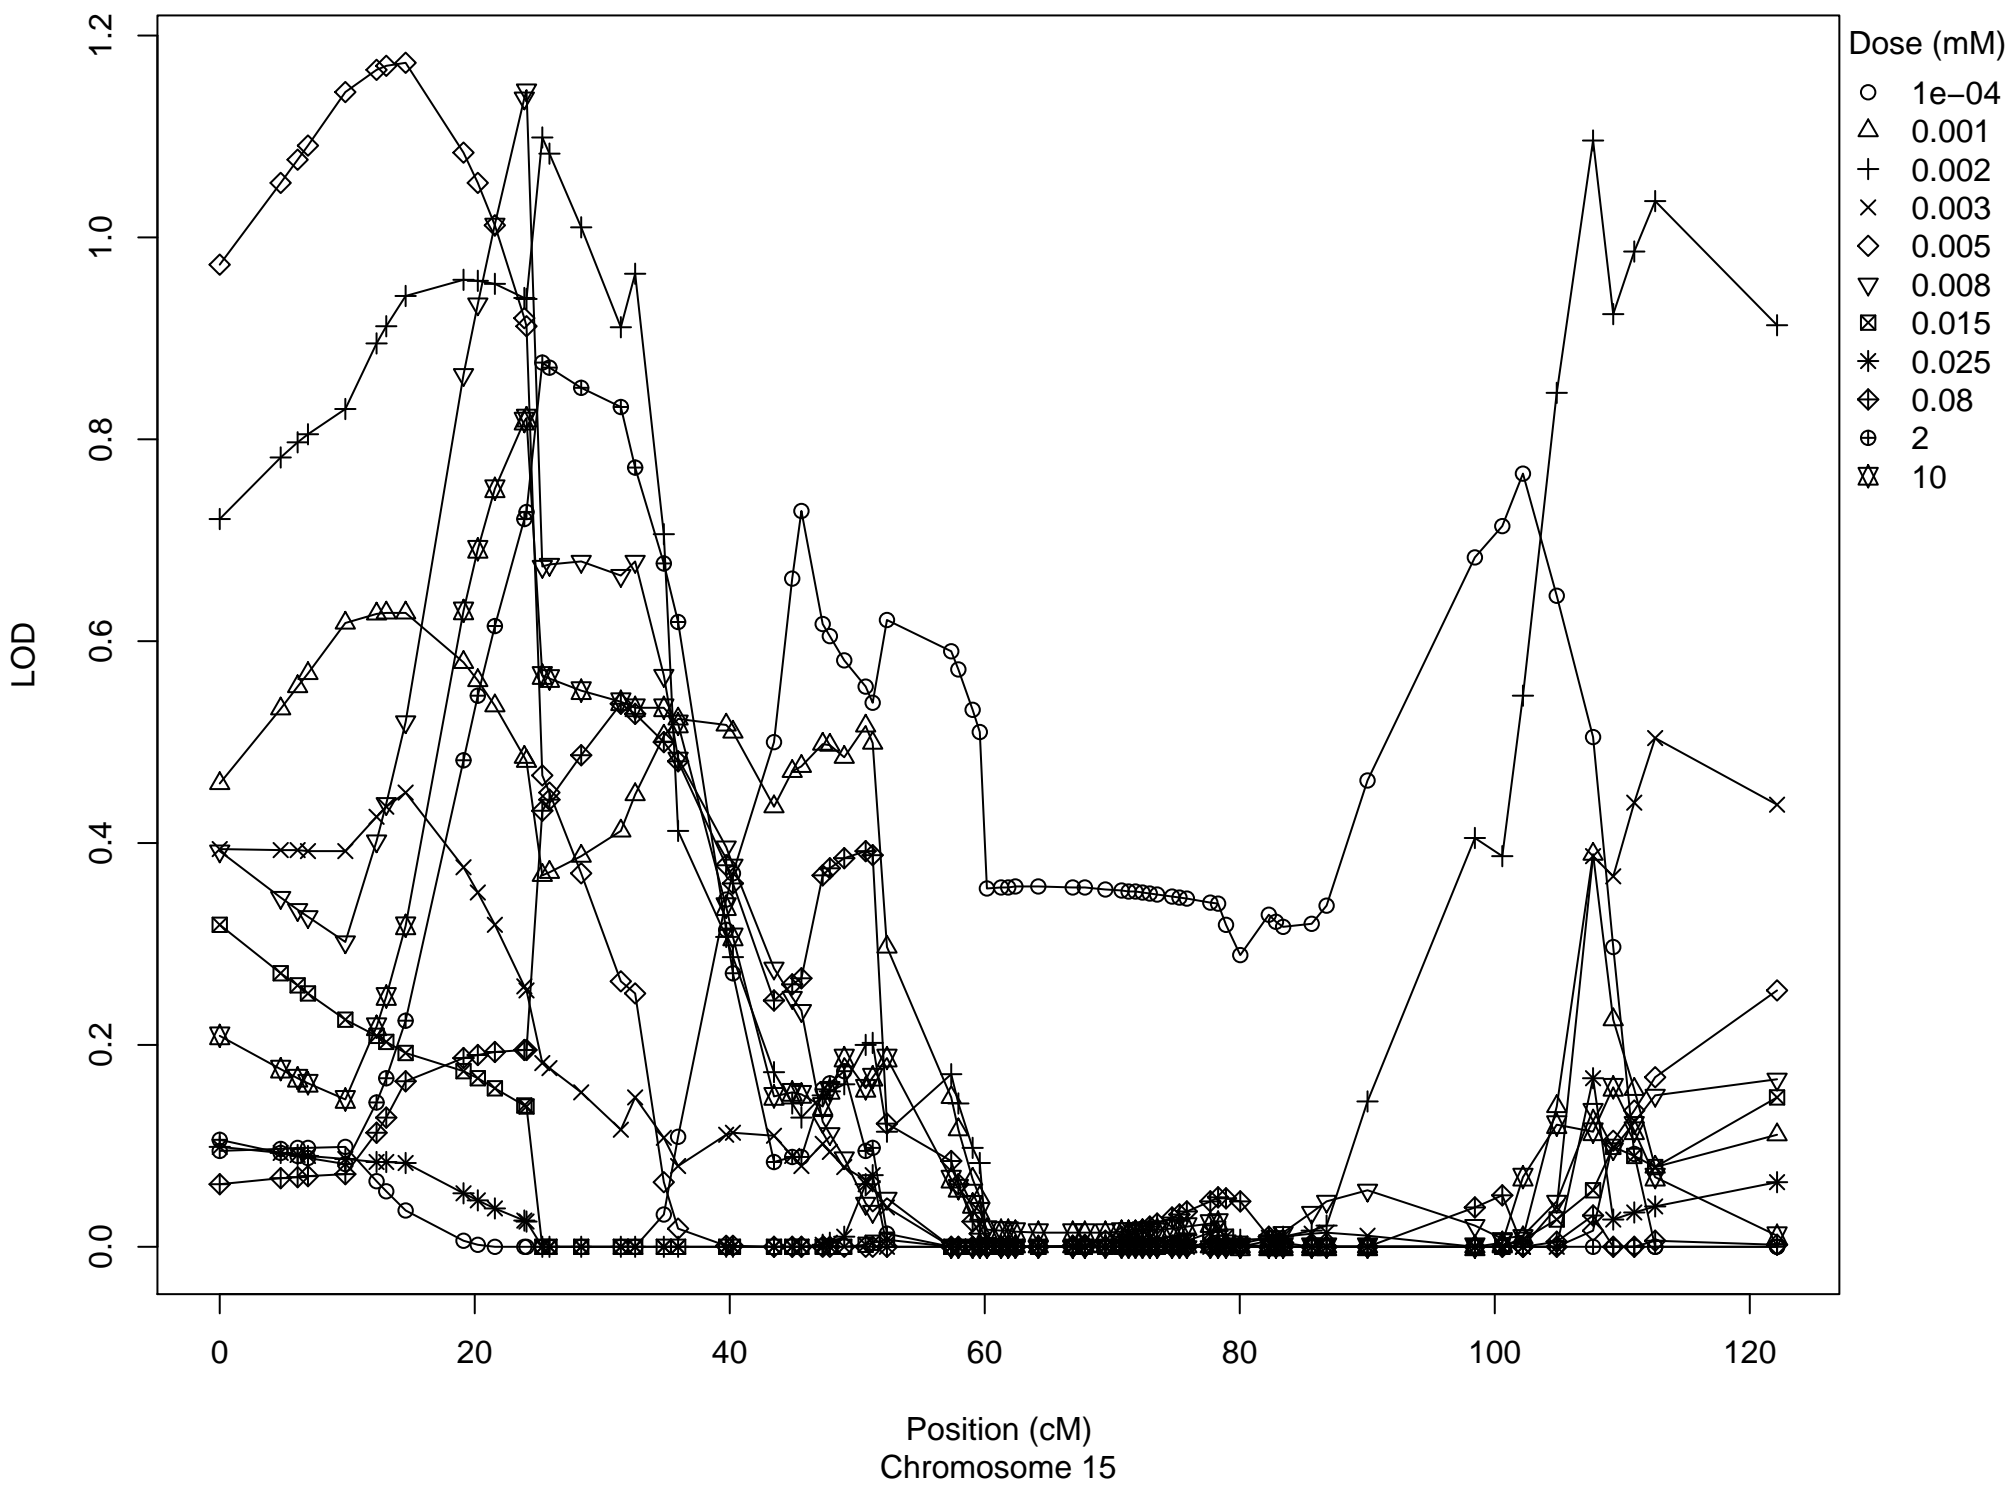

# 10-hydroxy-camptothecin (hCPT)

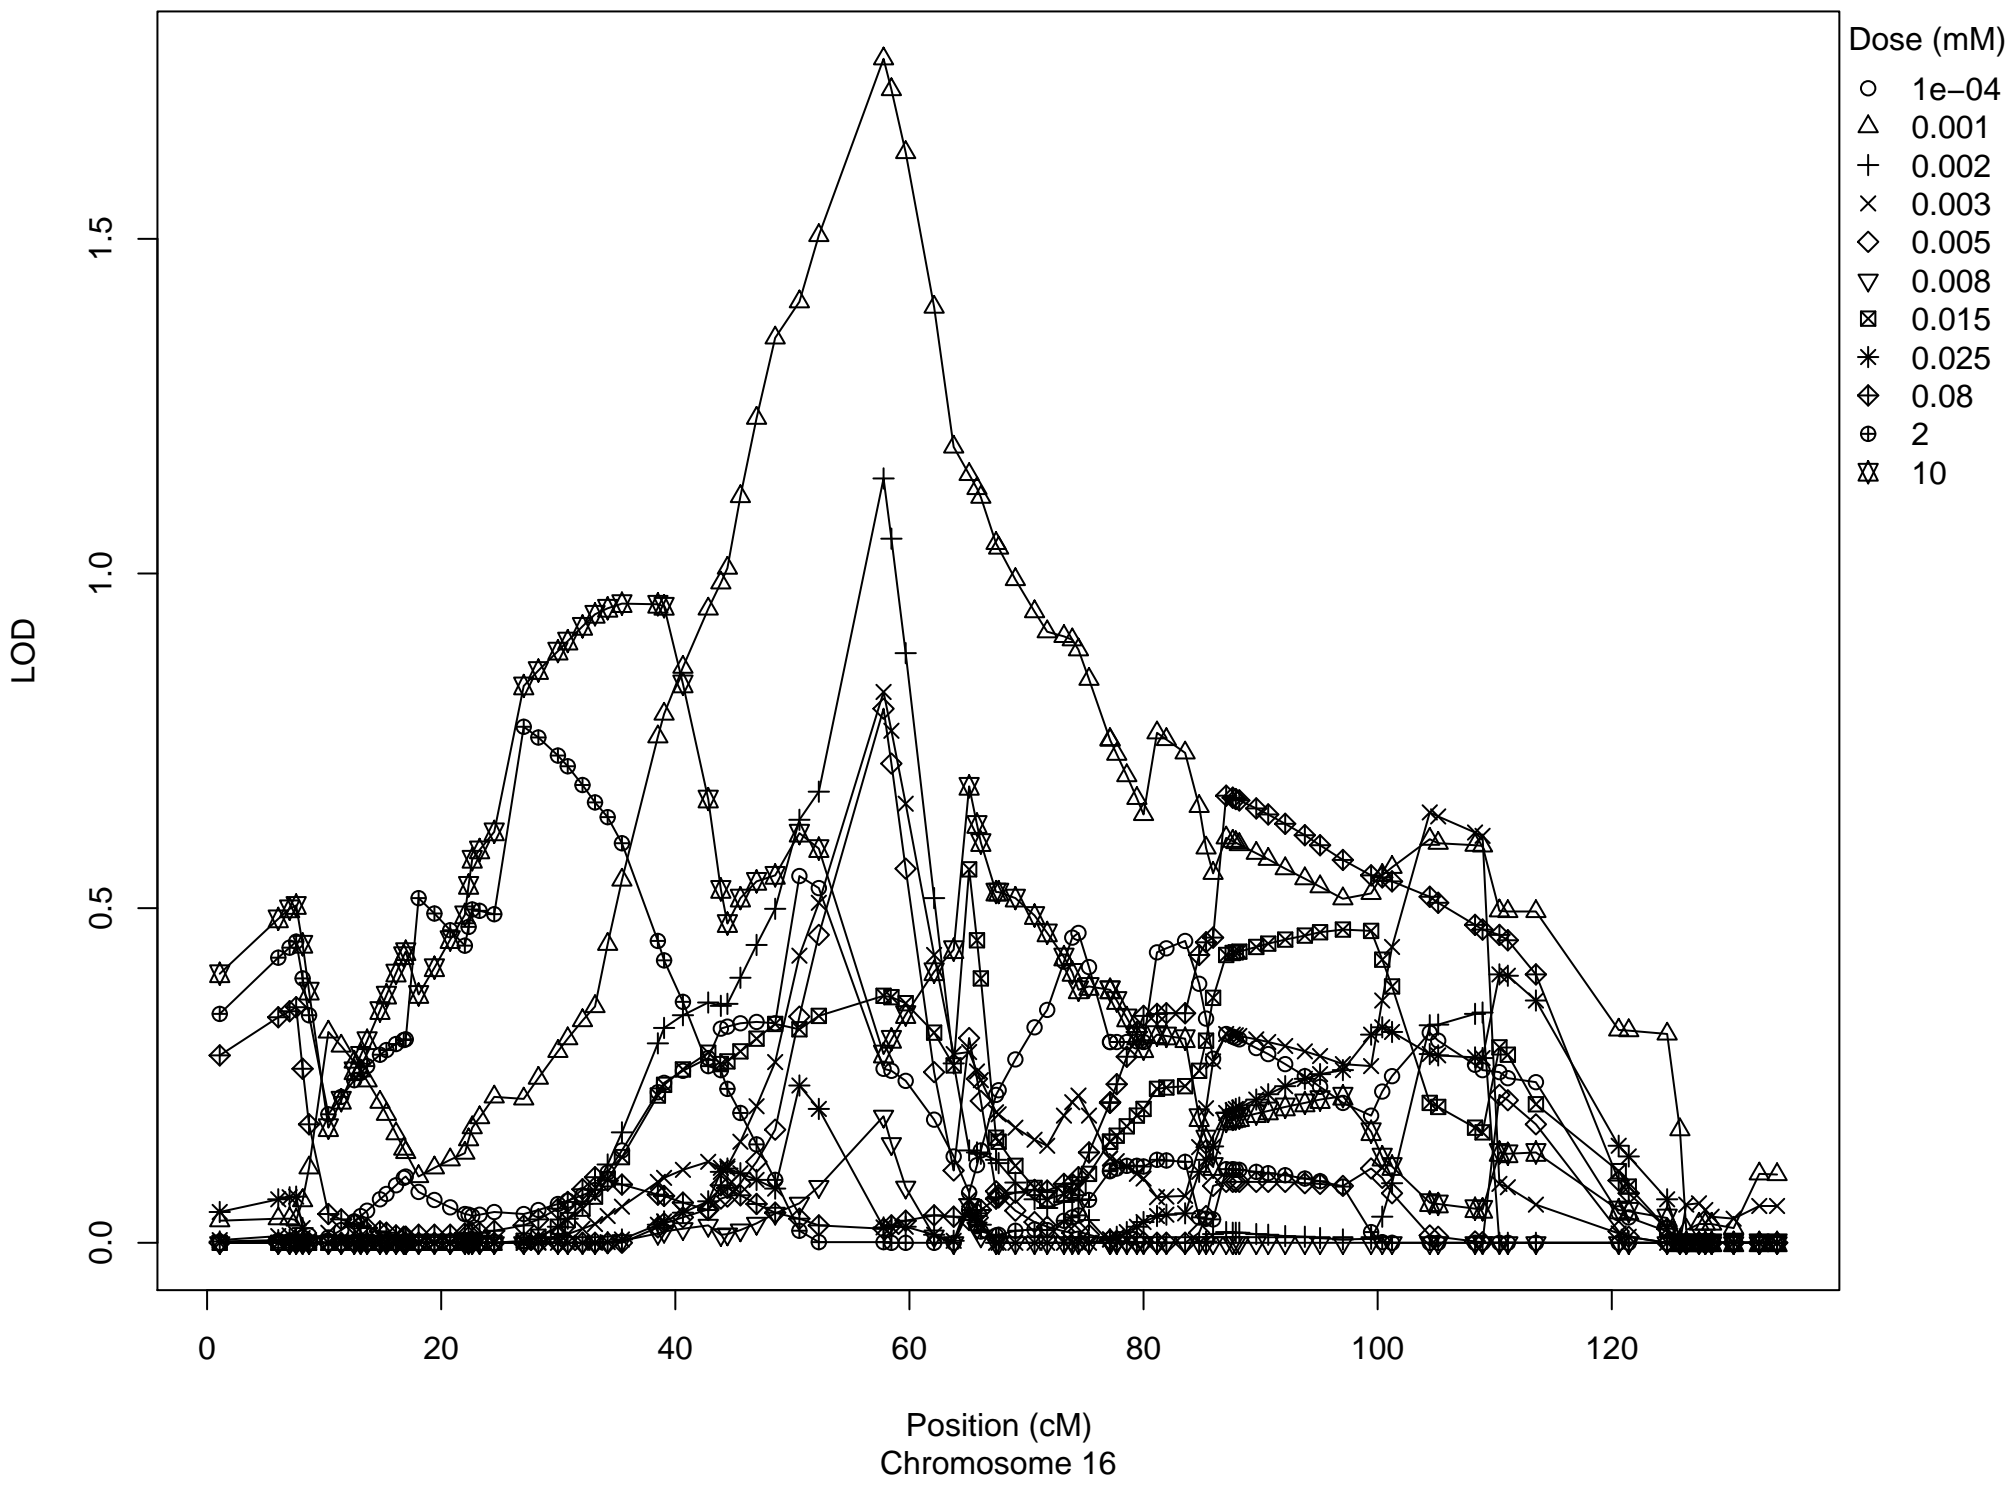

# 10-hydroxy-camptothecin (hCPT)

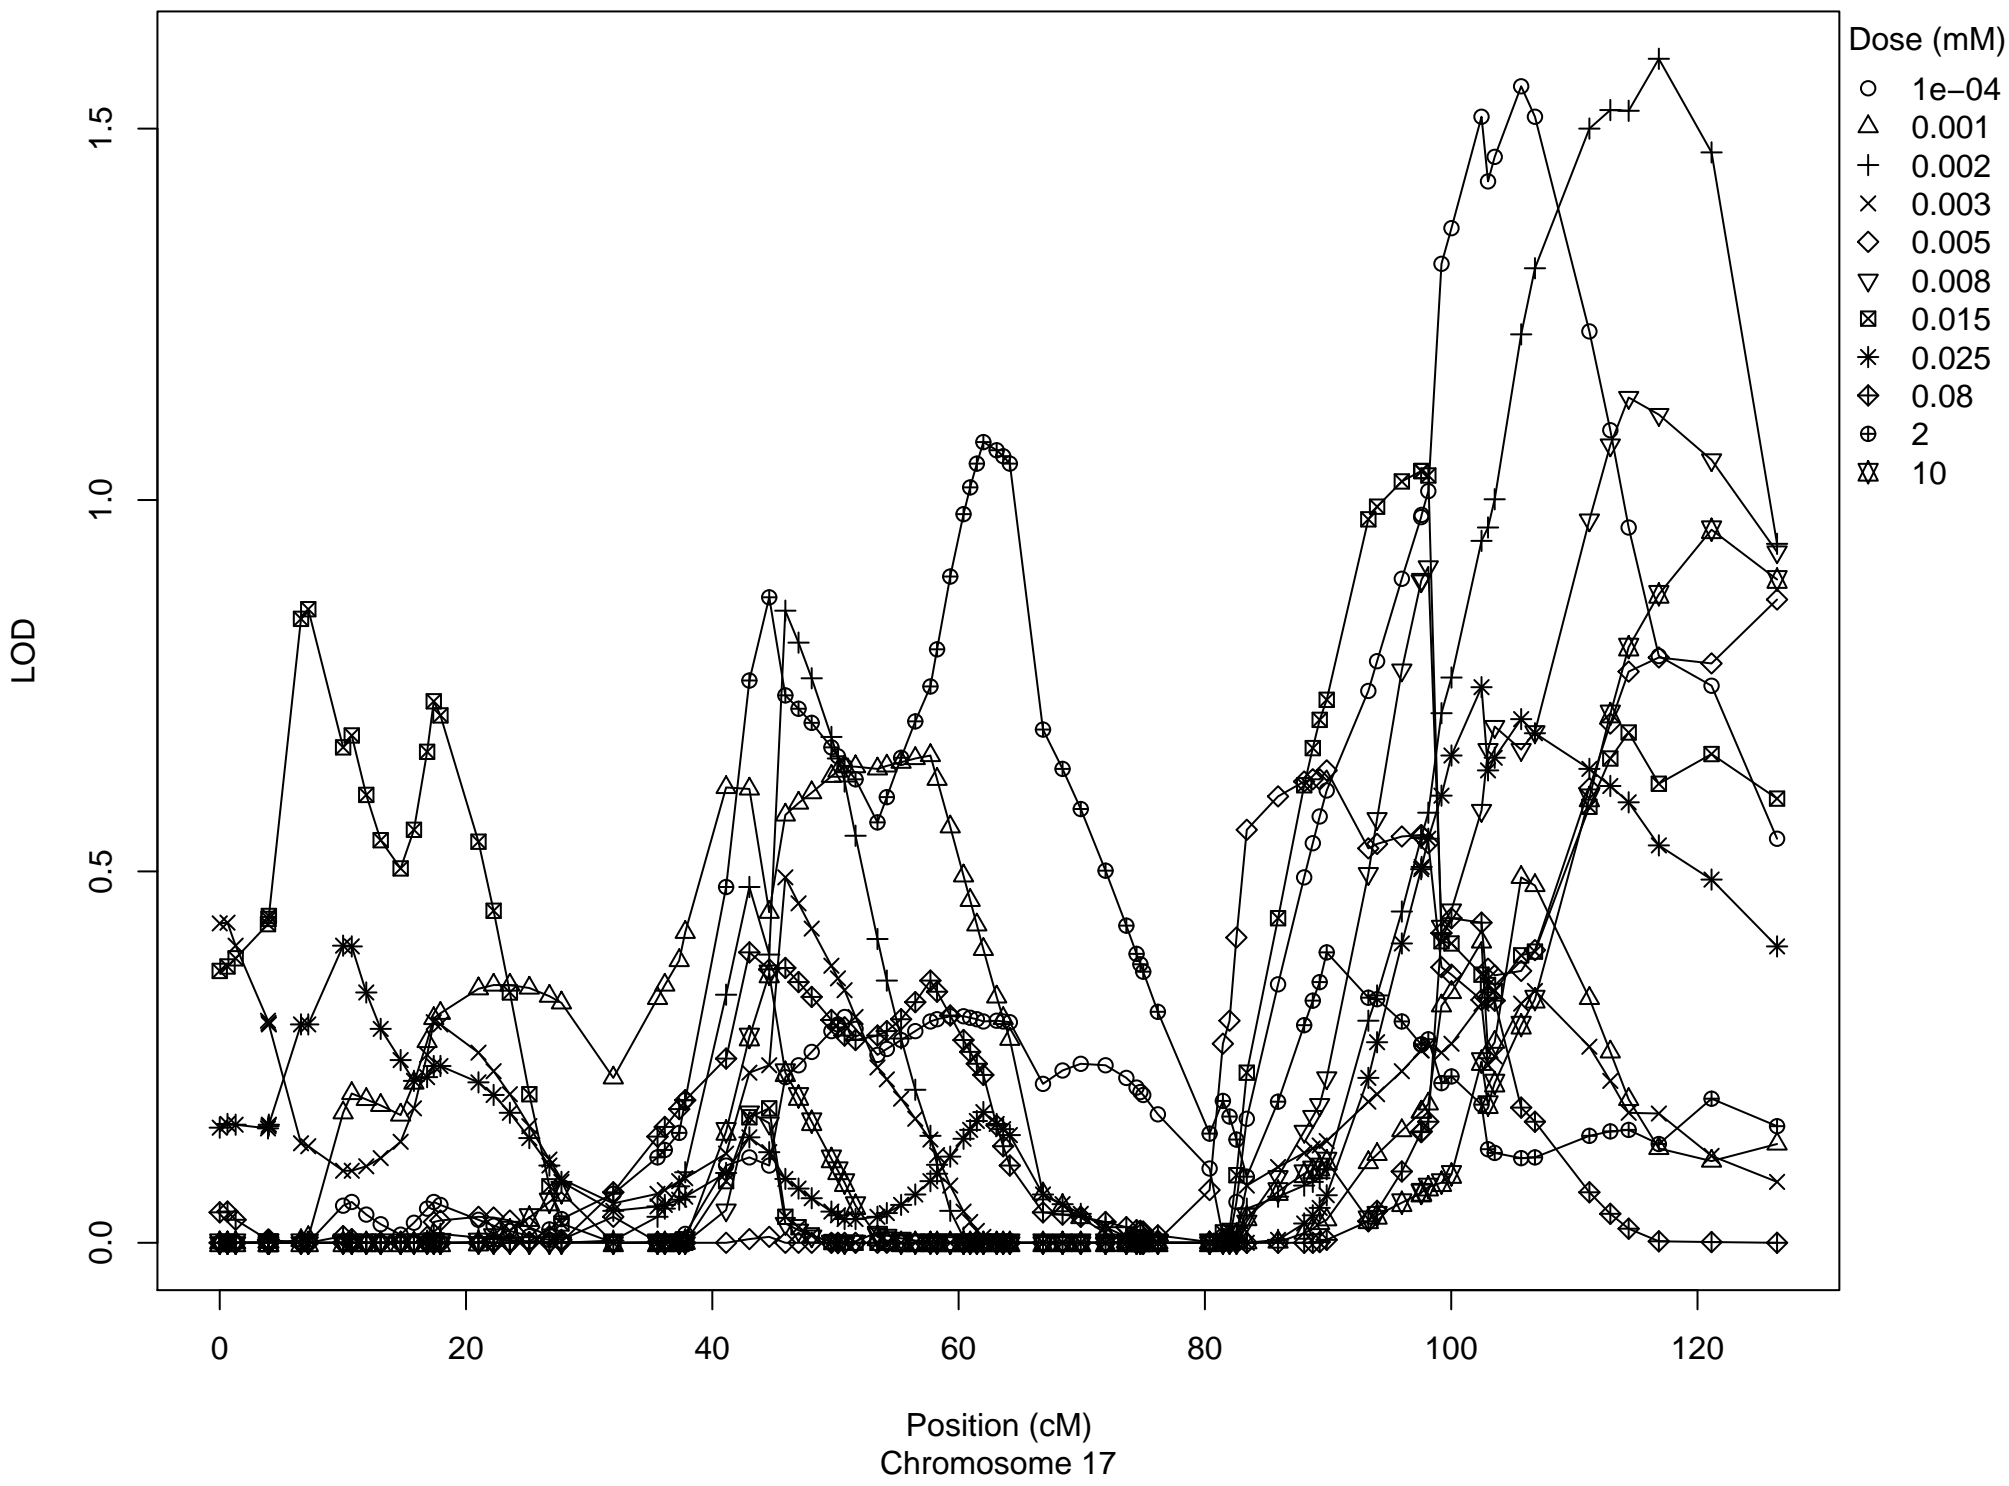

# 10-hydroxy-camptothecin (hCPT)

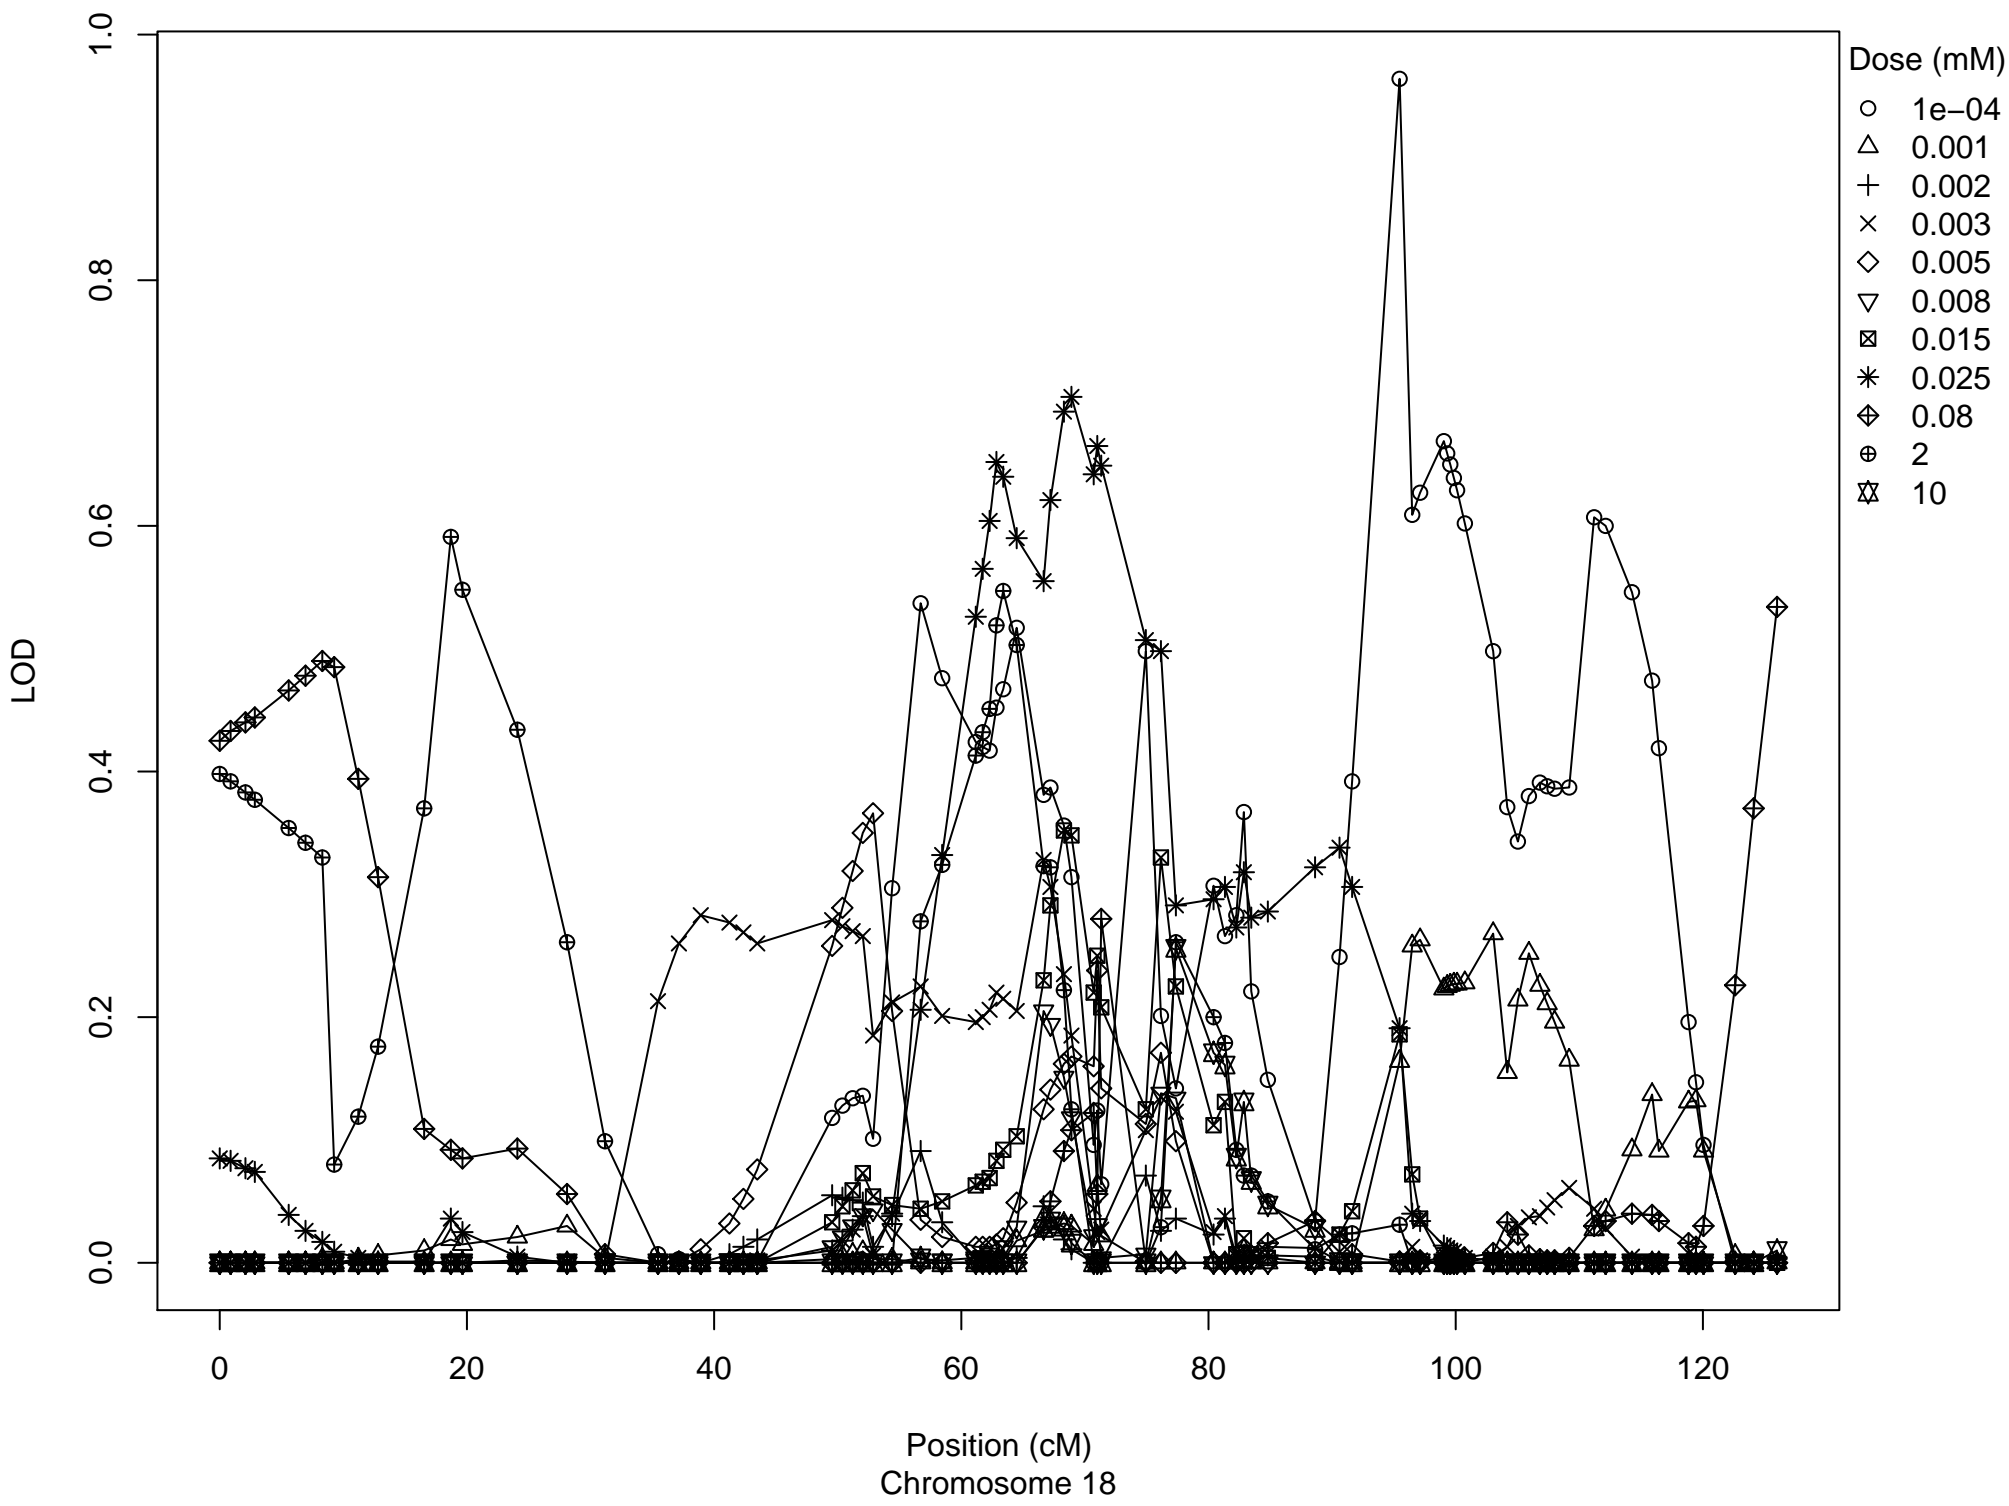

# 10-hydroxy-camptothecin (hCPT)

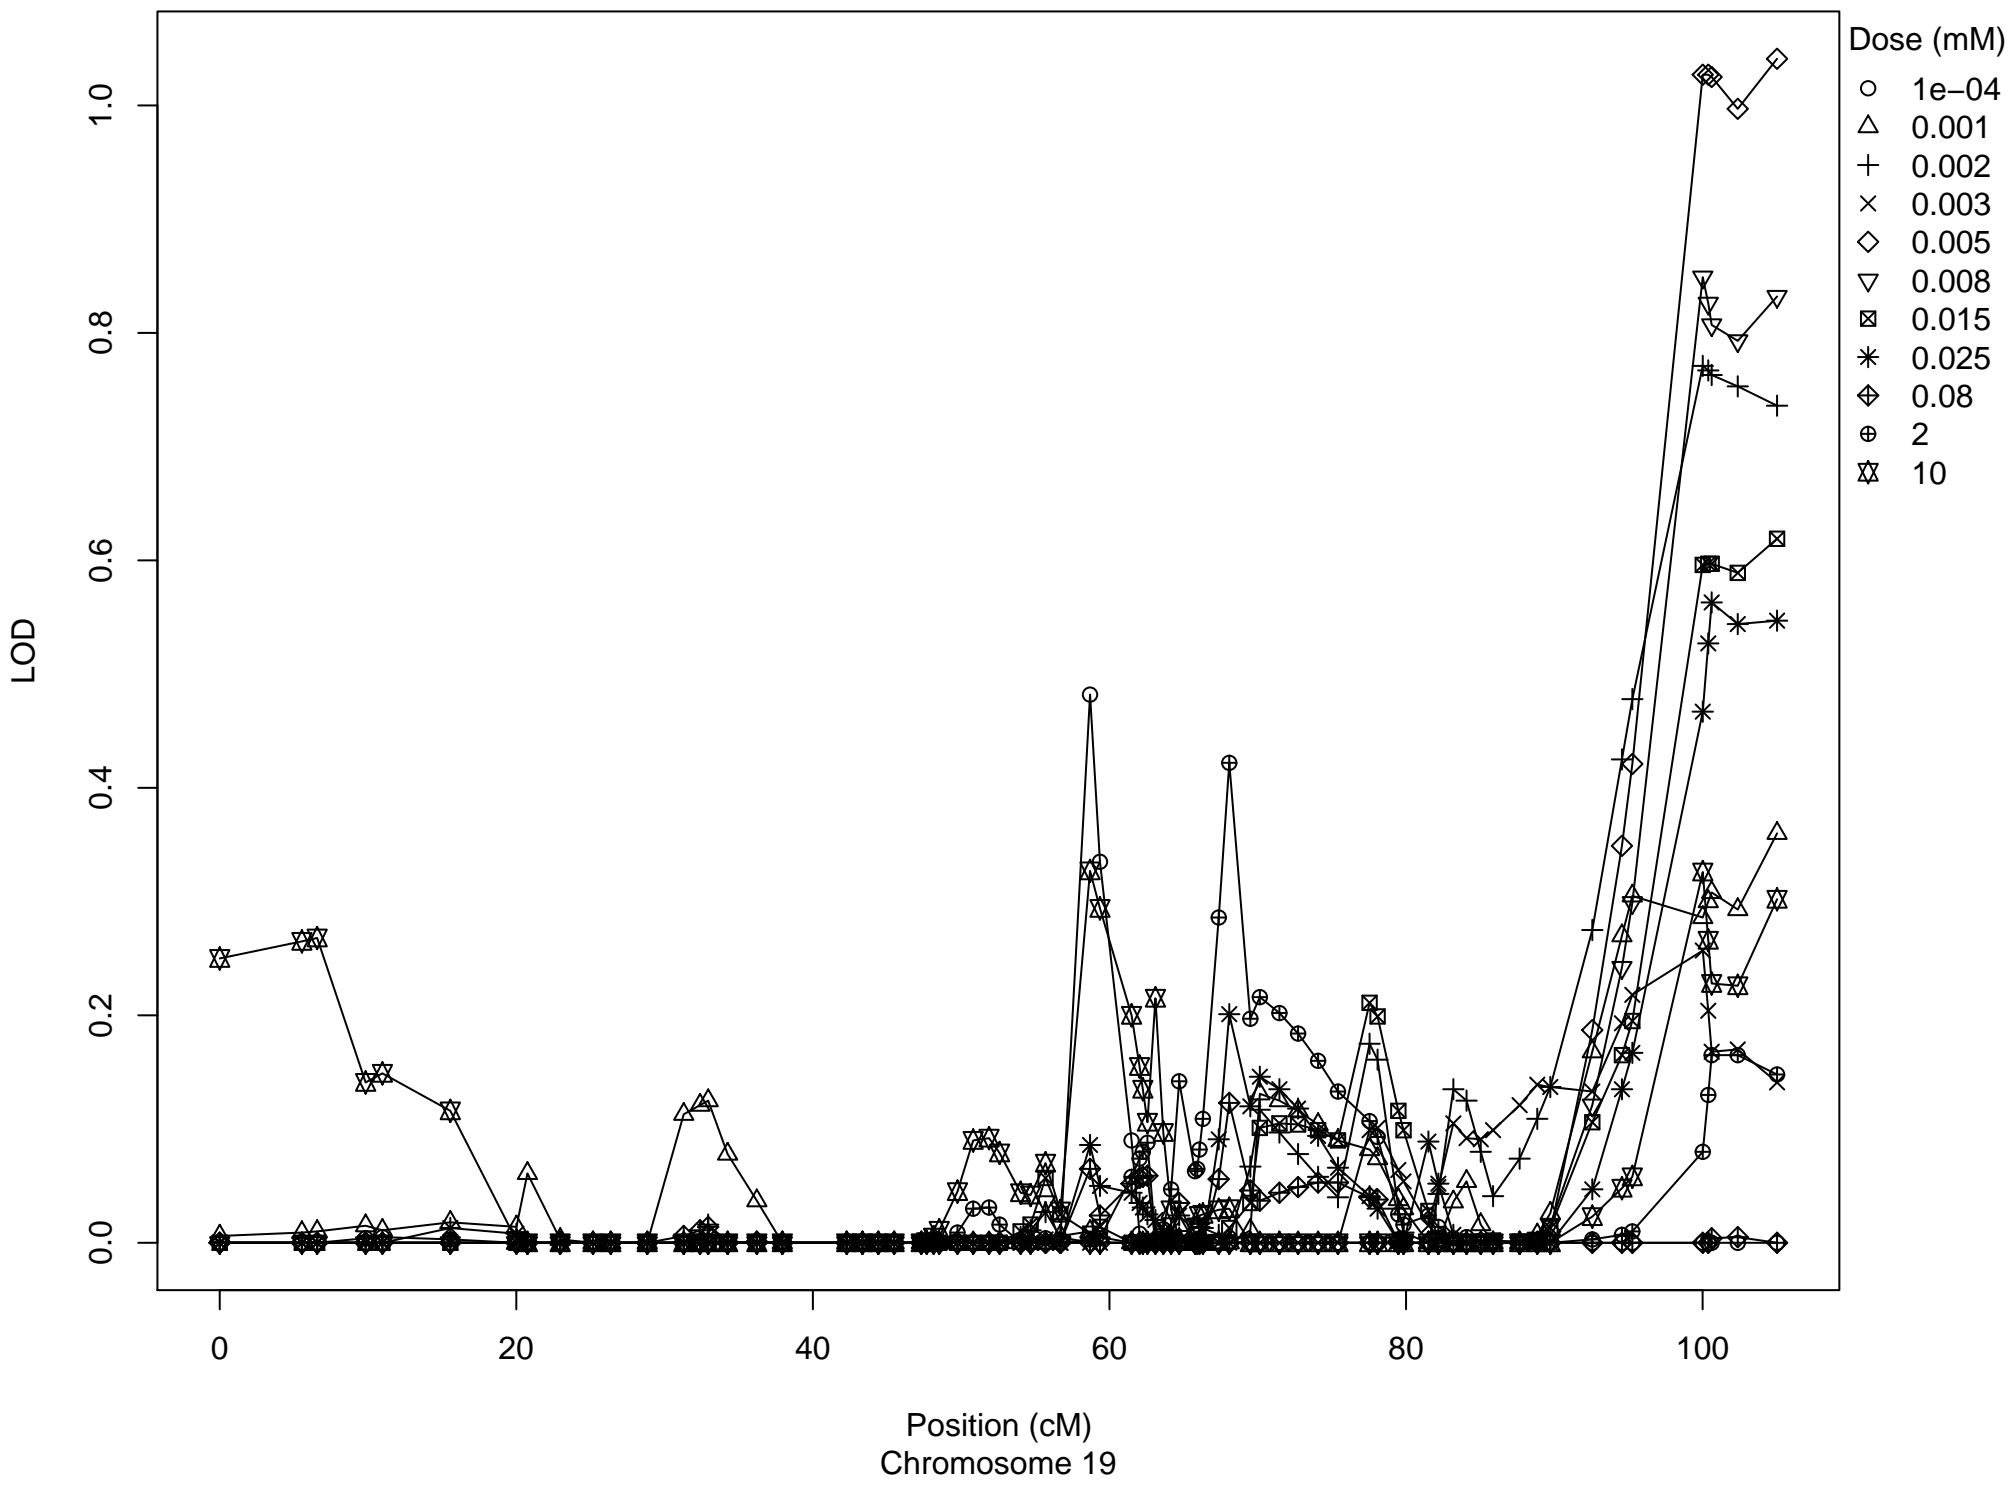





# 10-hydroxy-camptothecin (hCPT)

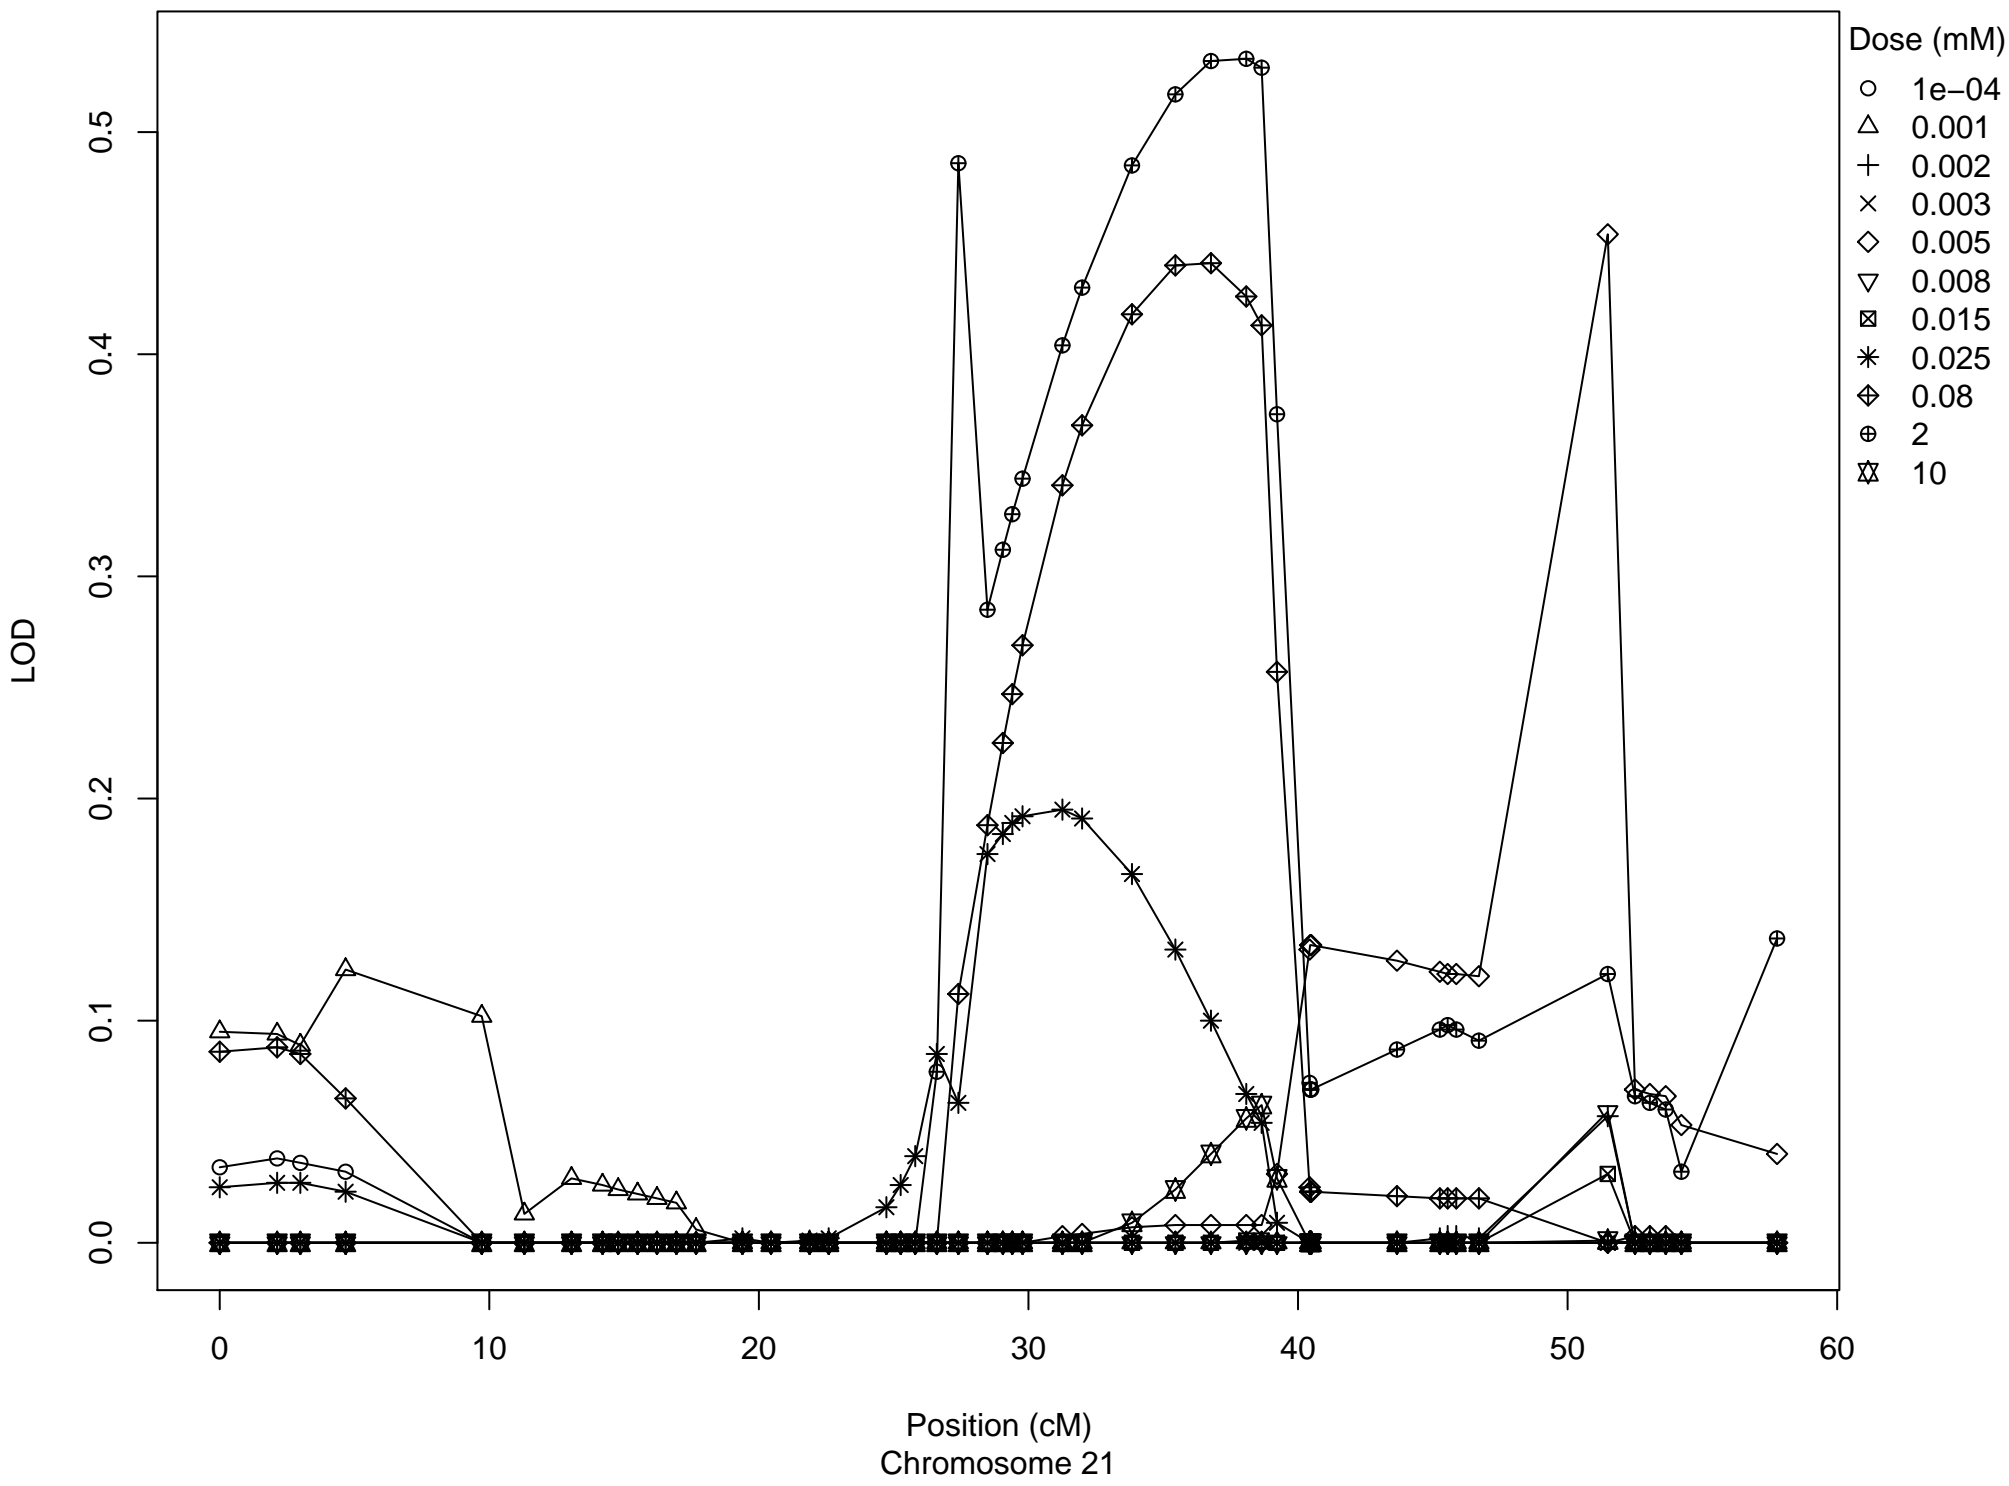

# 10-hydroxy-camptothecin (hCPT)

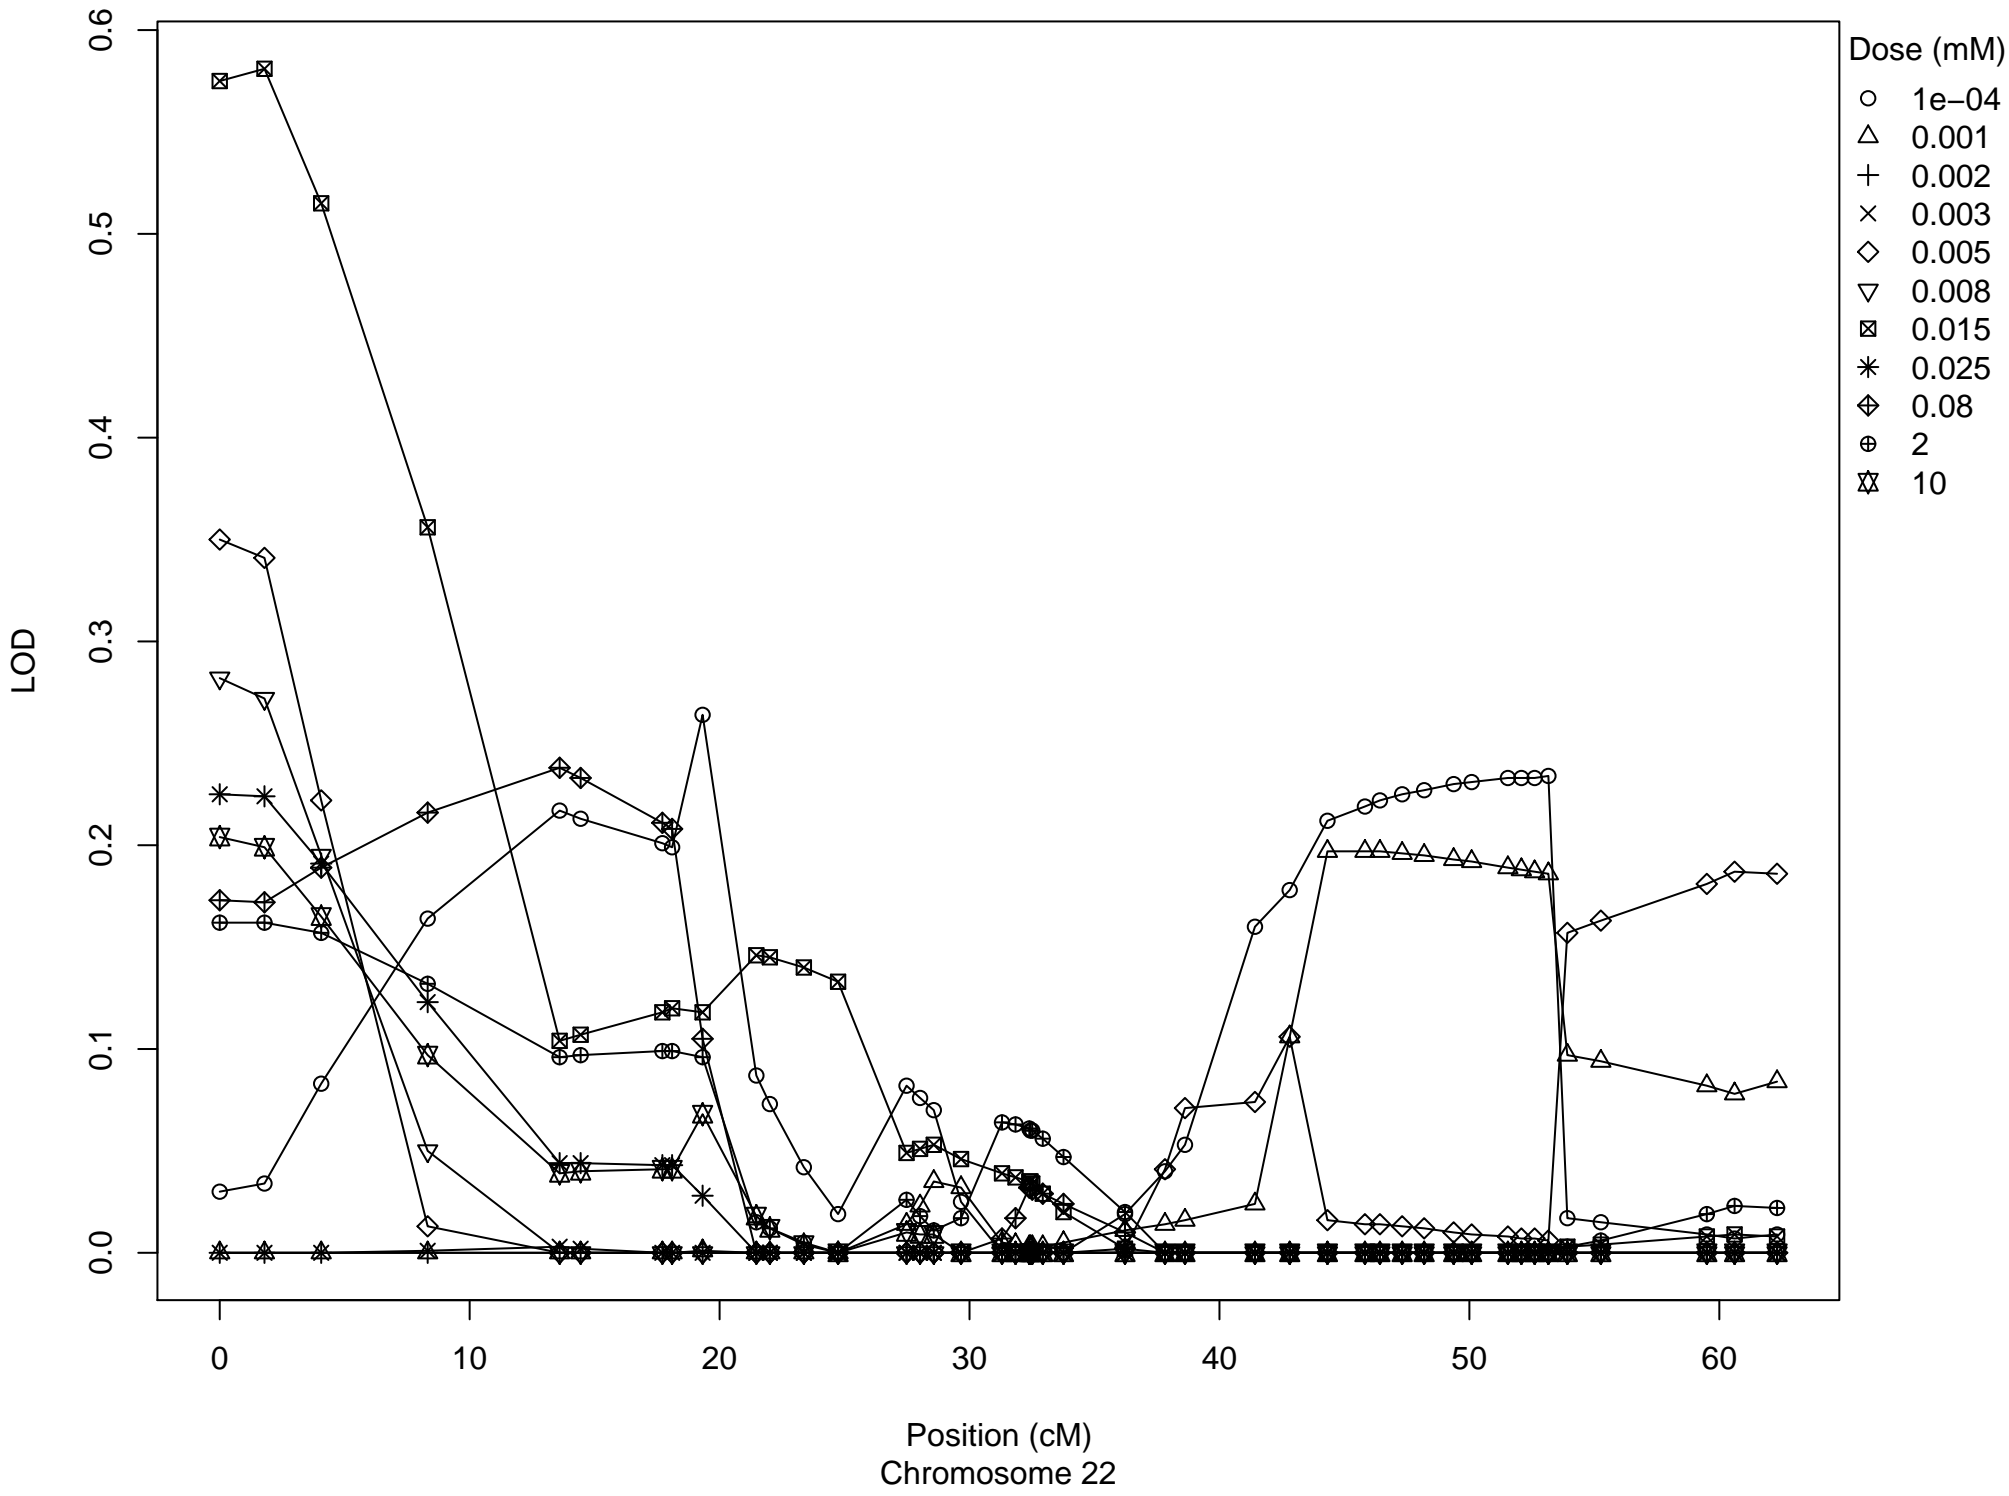

# IC50 (10-hydroxy-camptothecin) (IC50\_hCPT)

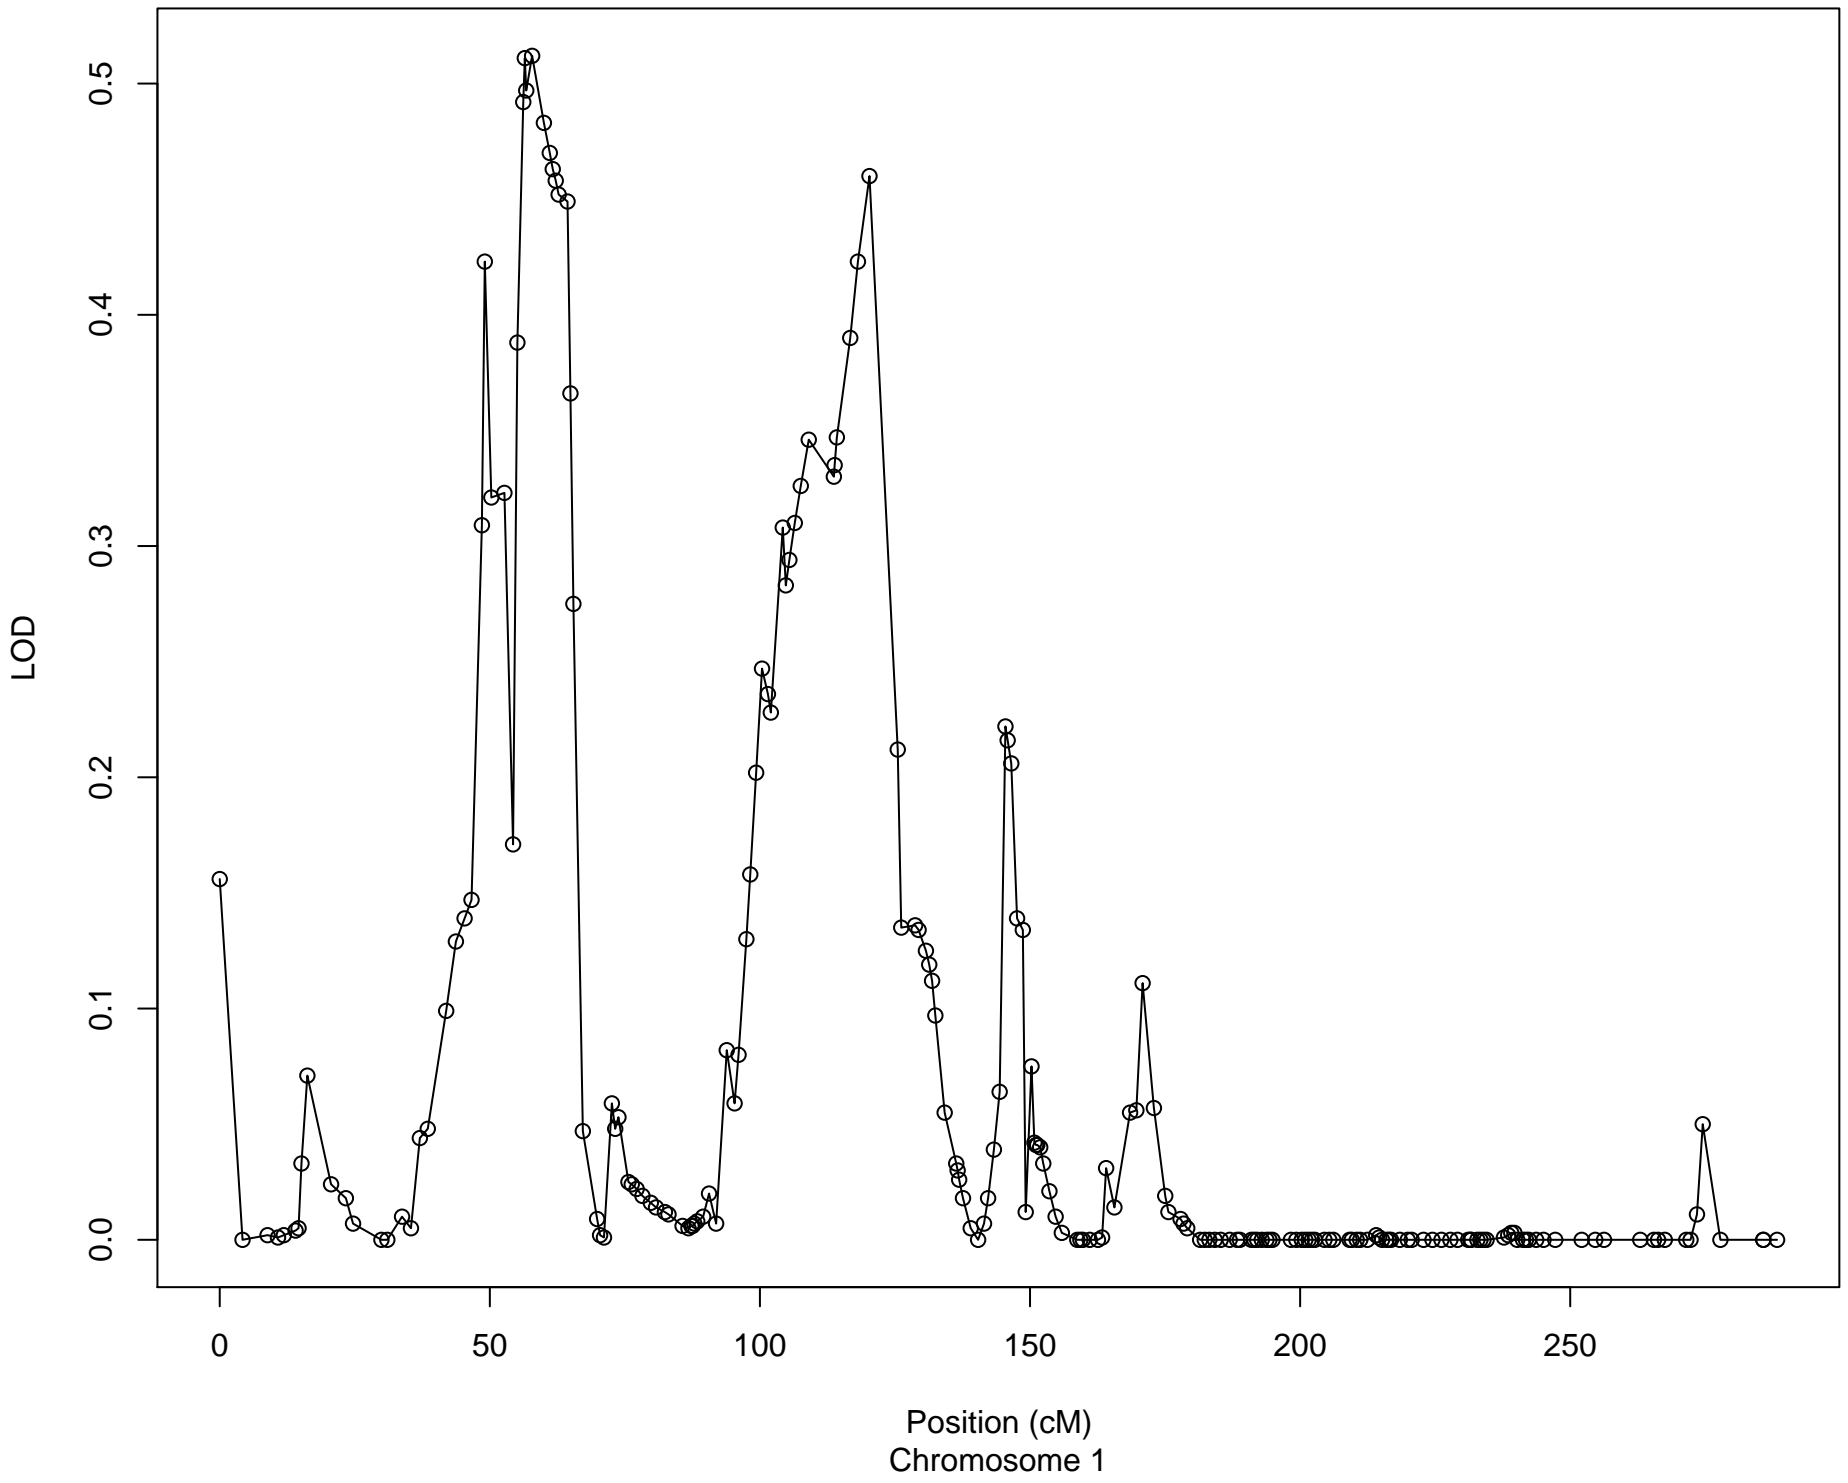

# IC50 (10-hydroxy-camptothecin) (IC50\_hCPT)

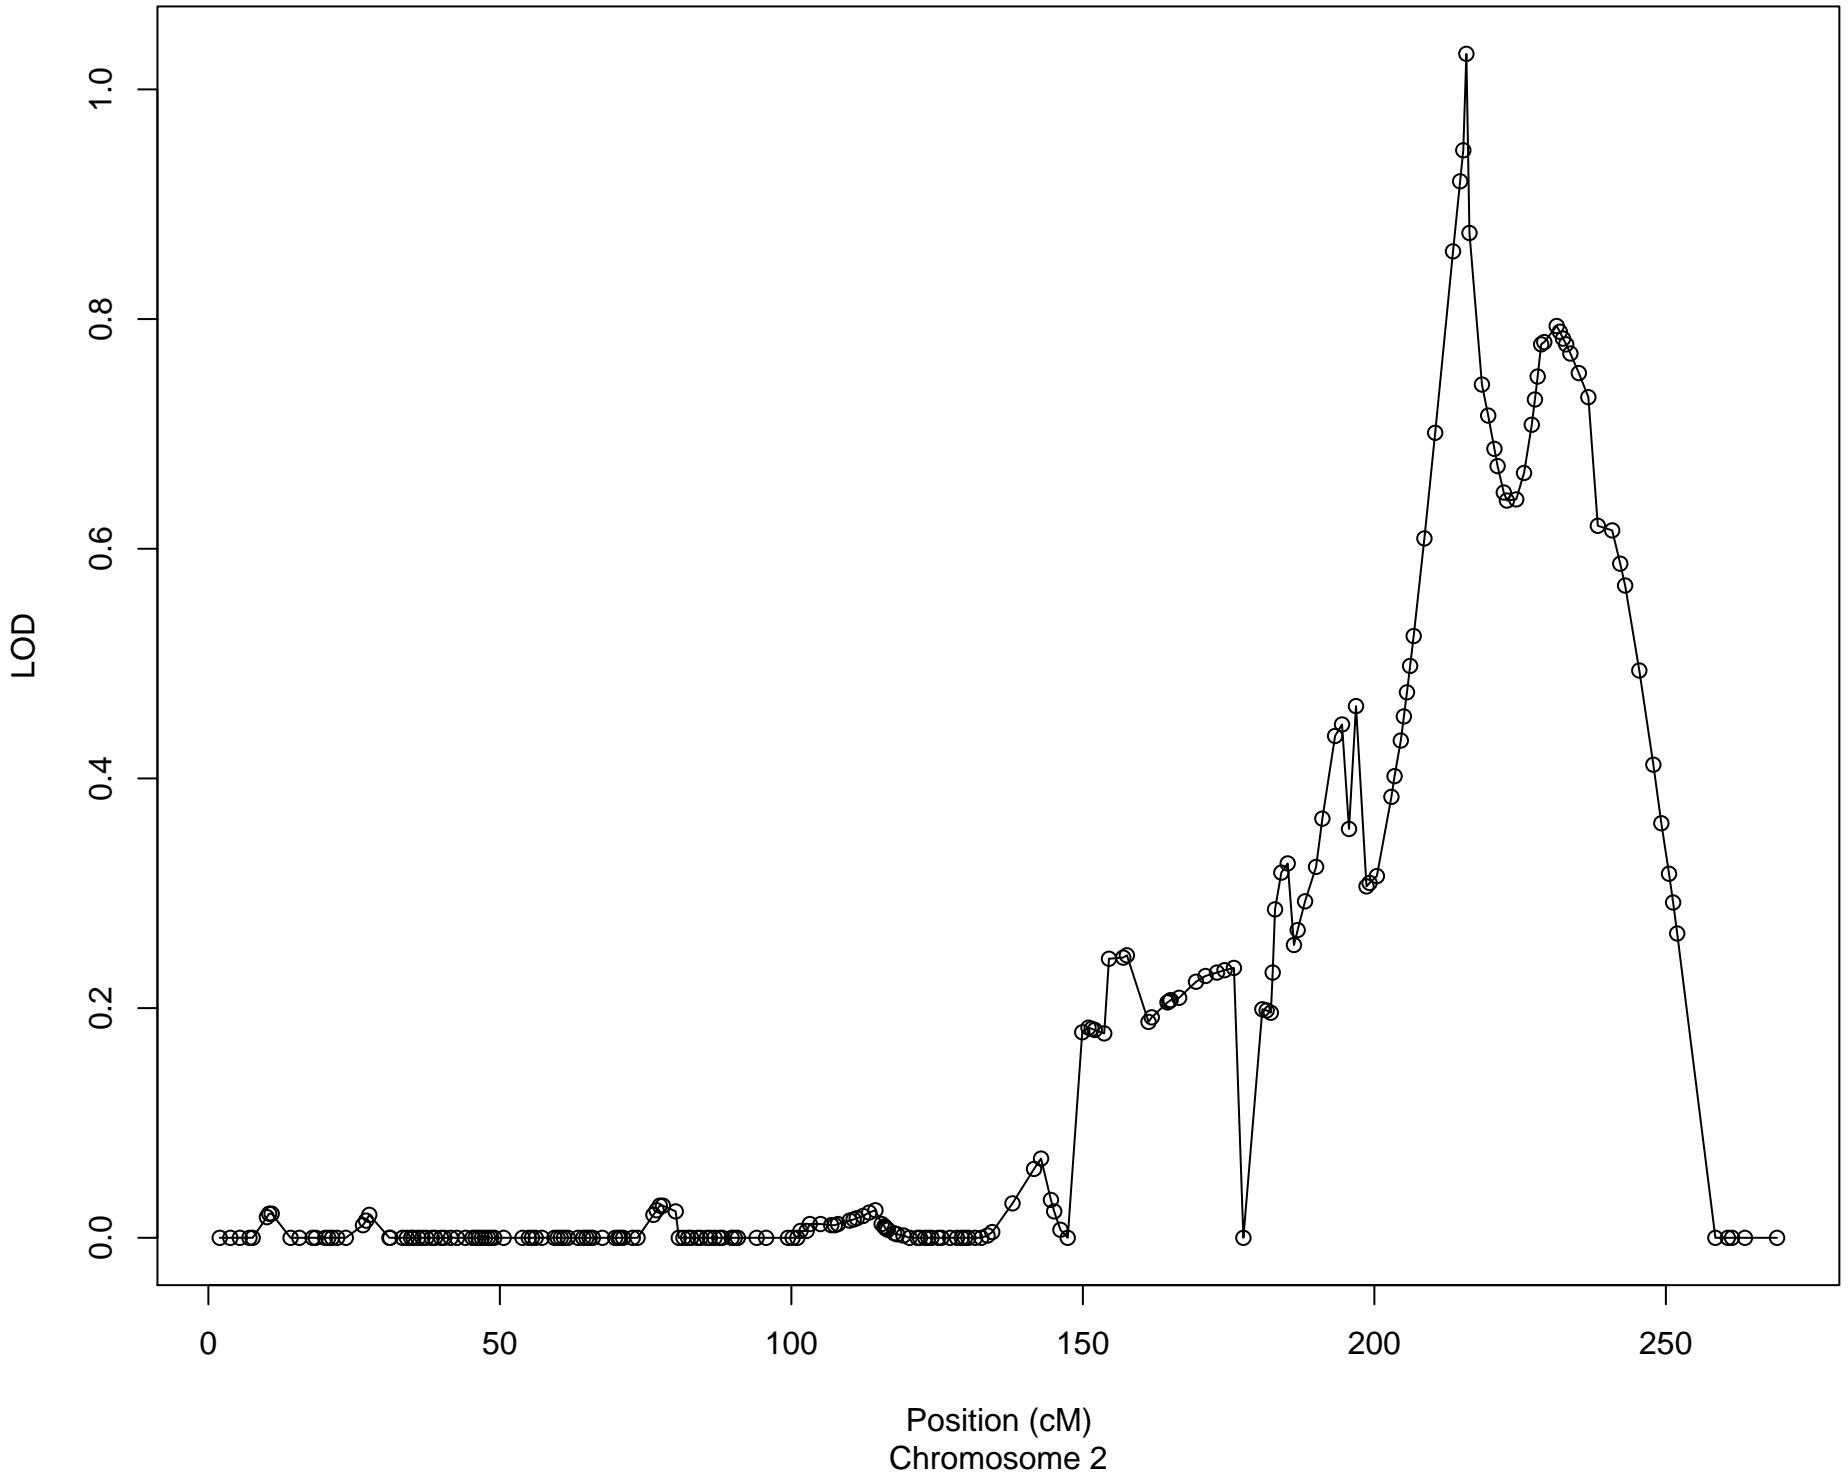

# IC50 (10-hydroxy-camptothecin) (IC50\_hCPT)

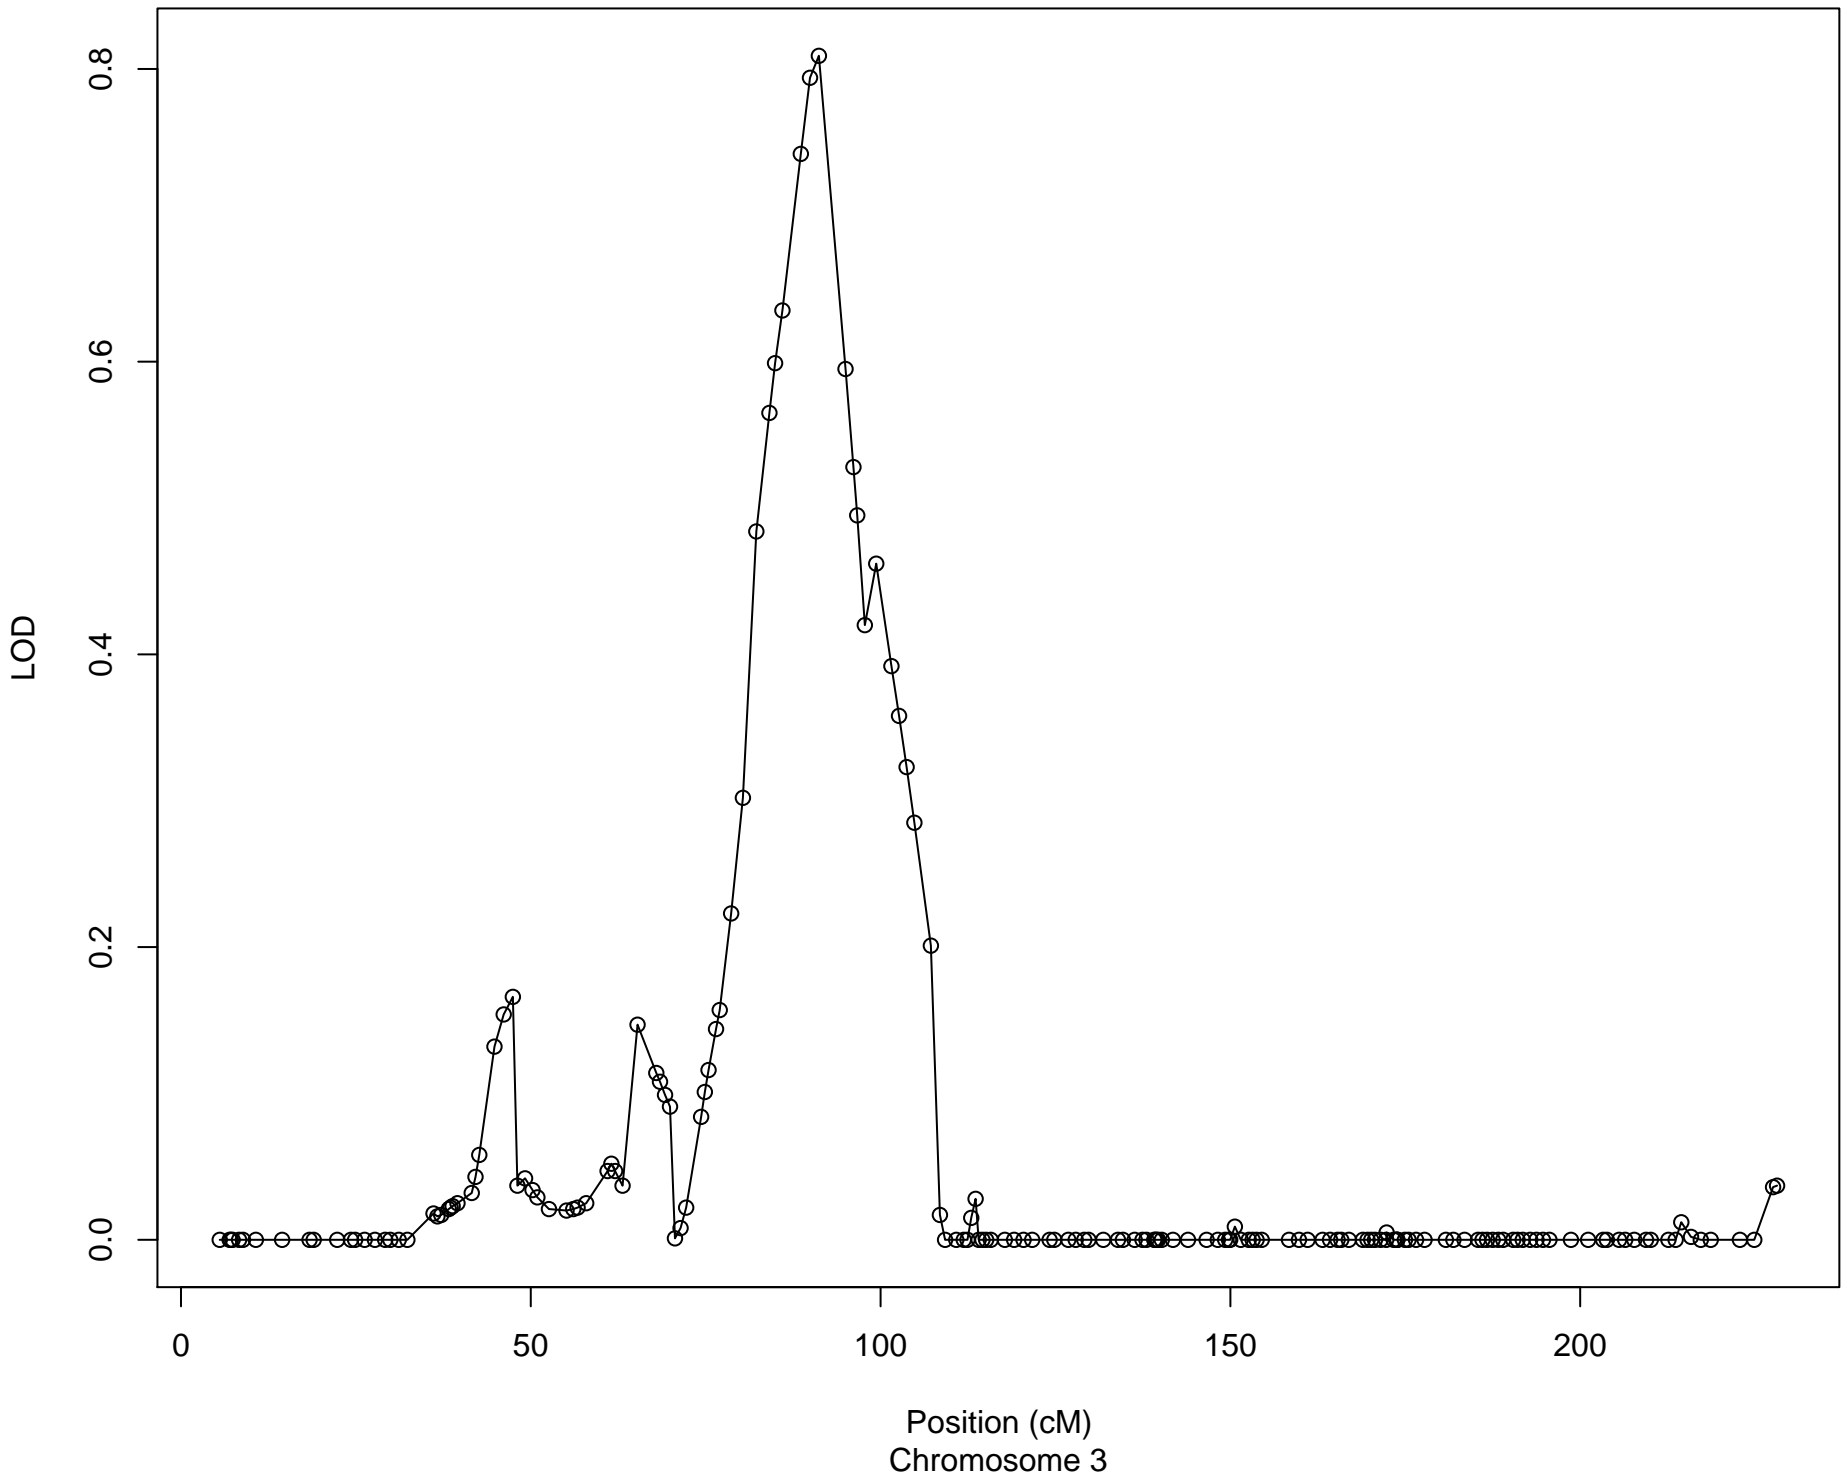

# IC50 (10-hydroxy-camptothecin) (IC50\_hCPT)

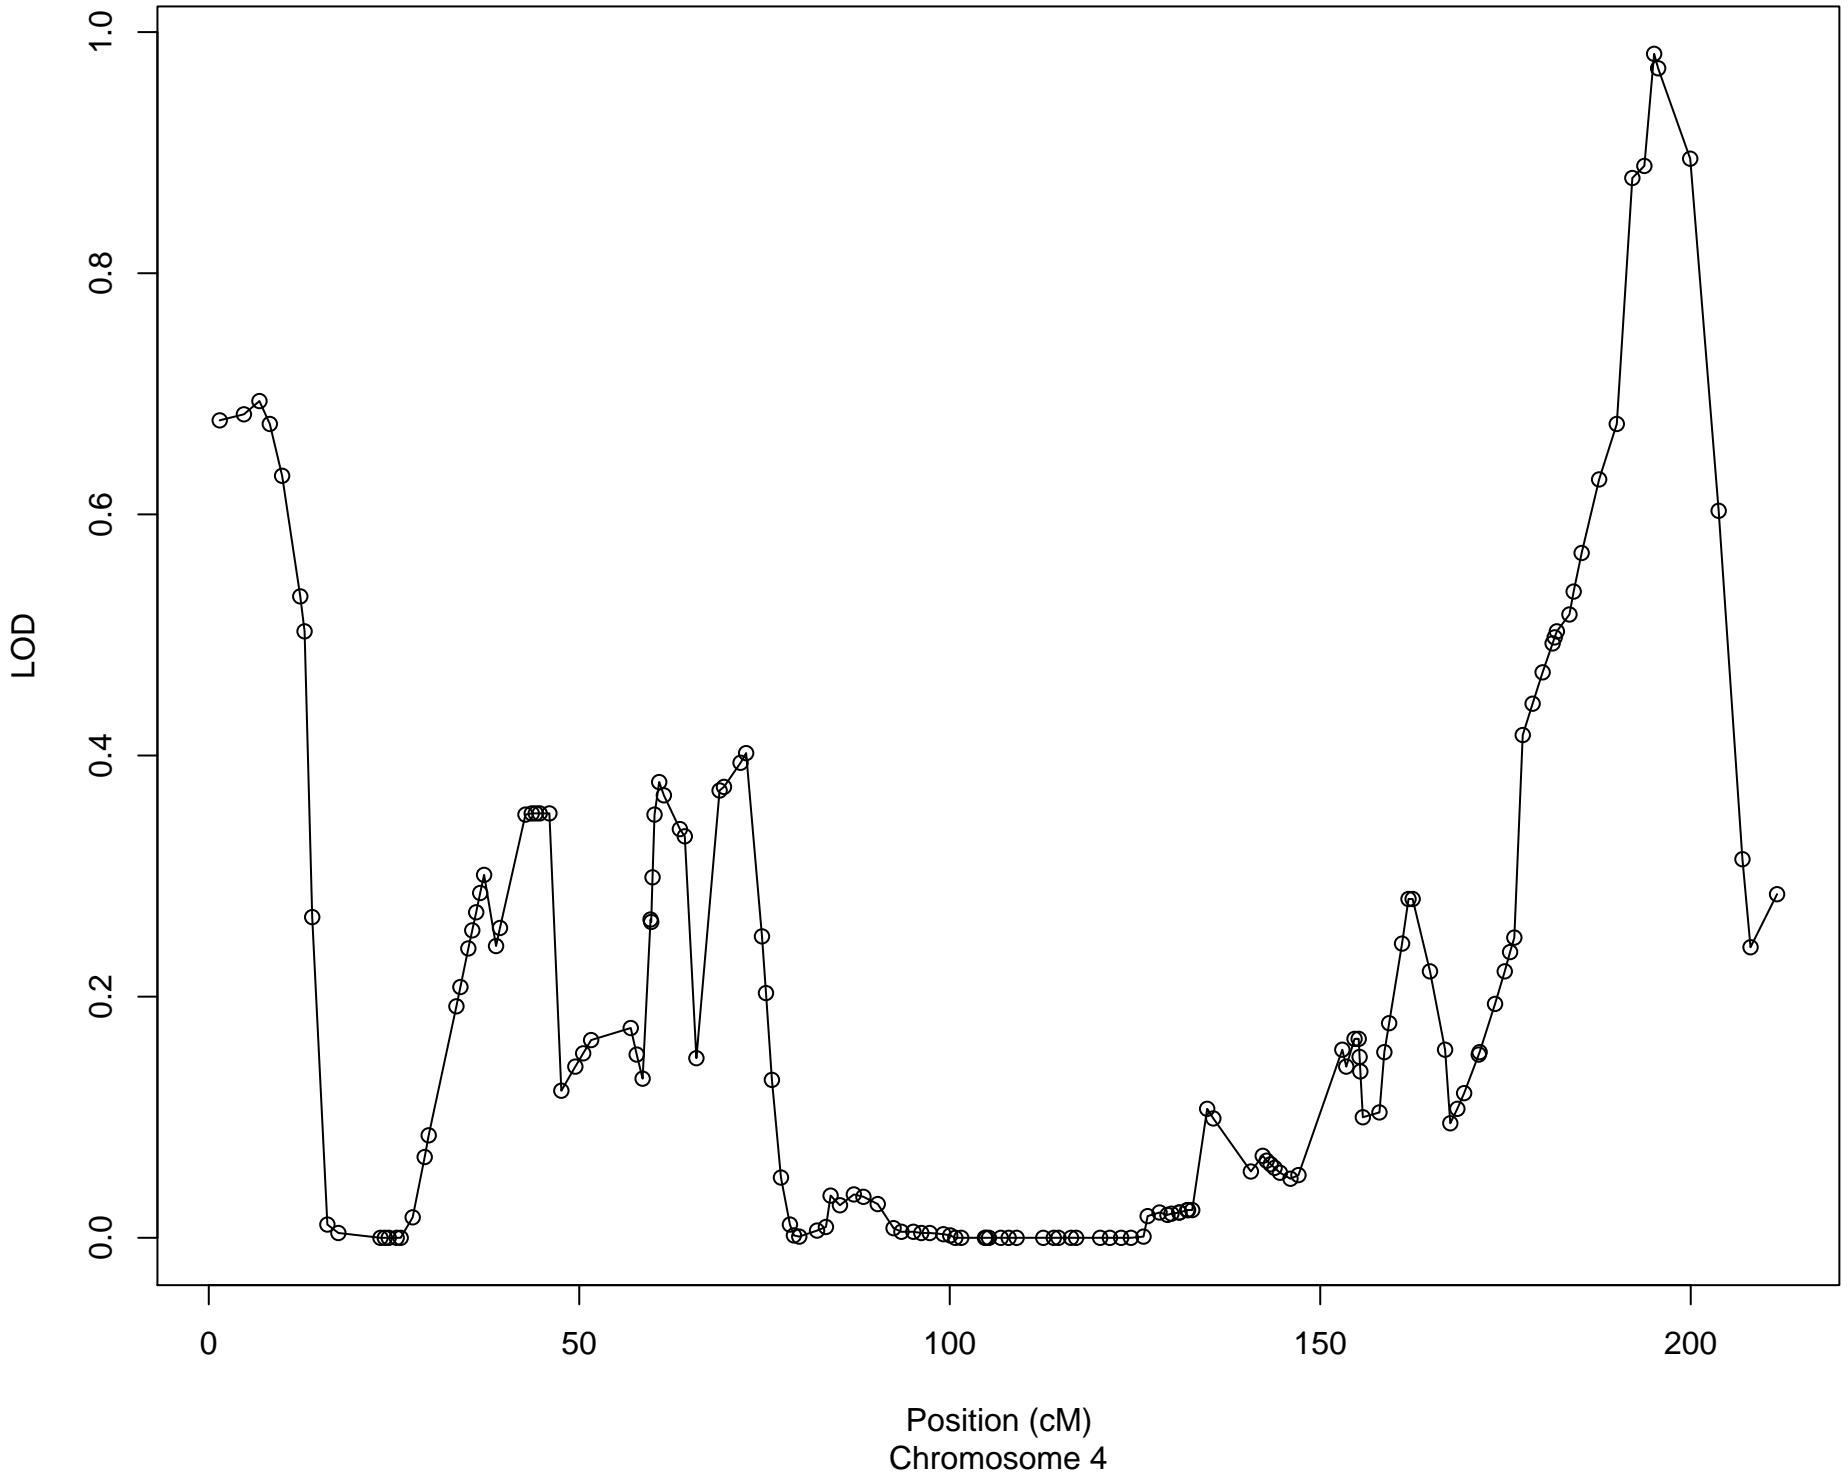

# IC50 (10-hydroxy-camptothecin) (IC50\_hCPT)

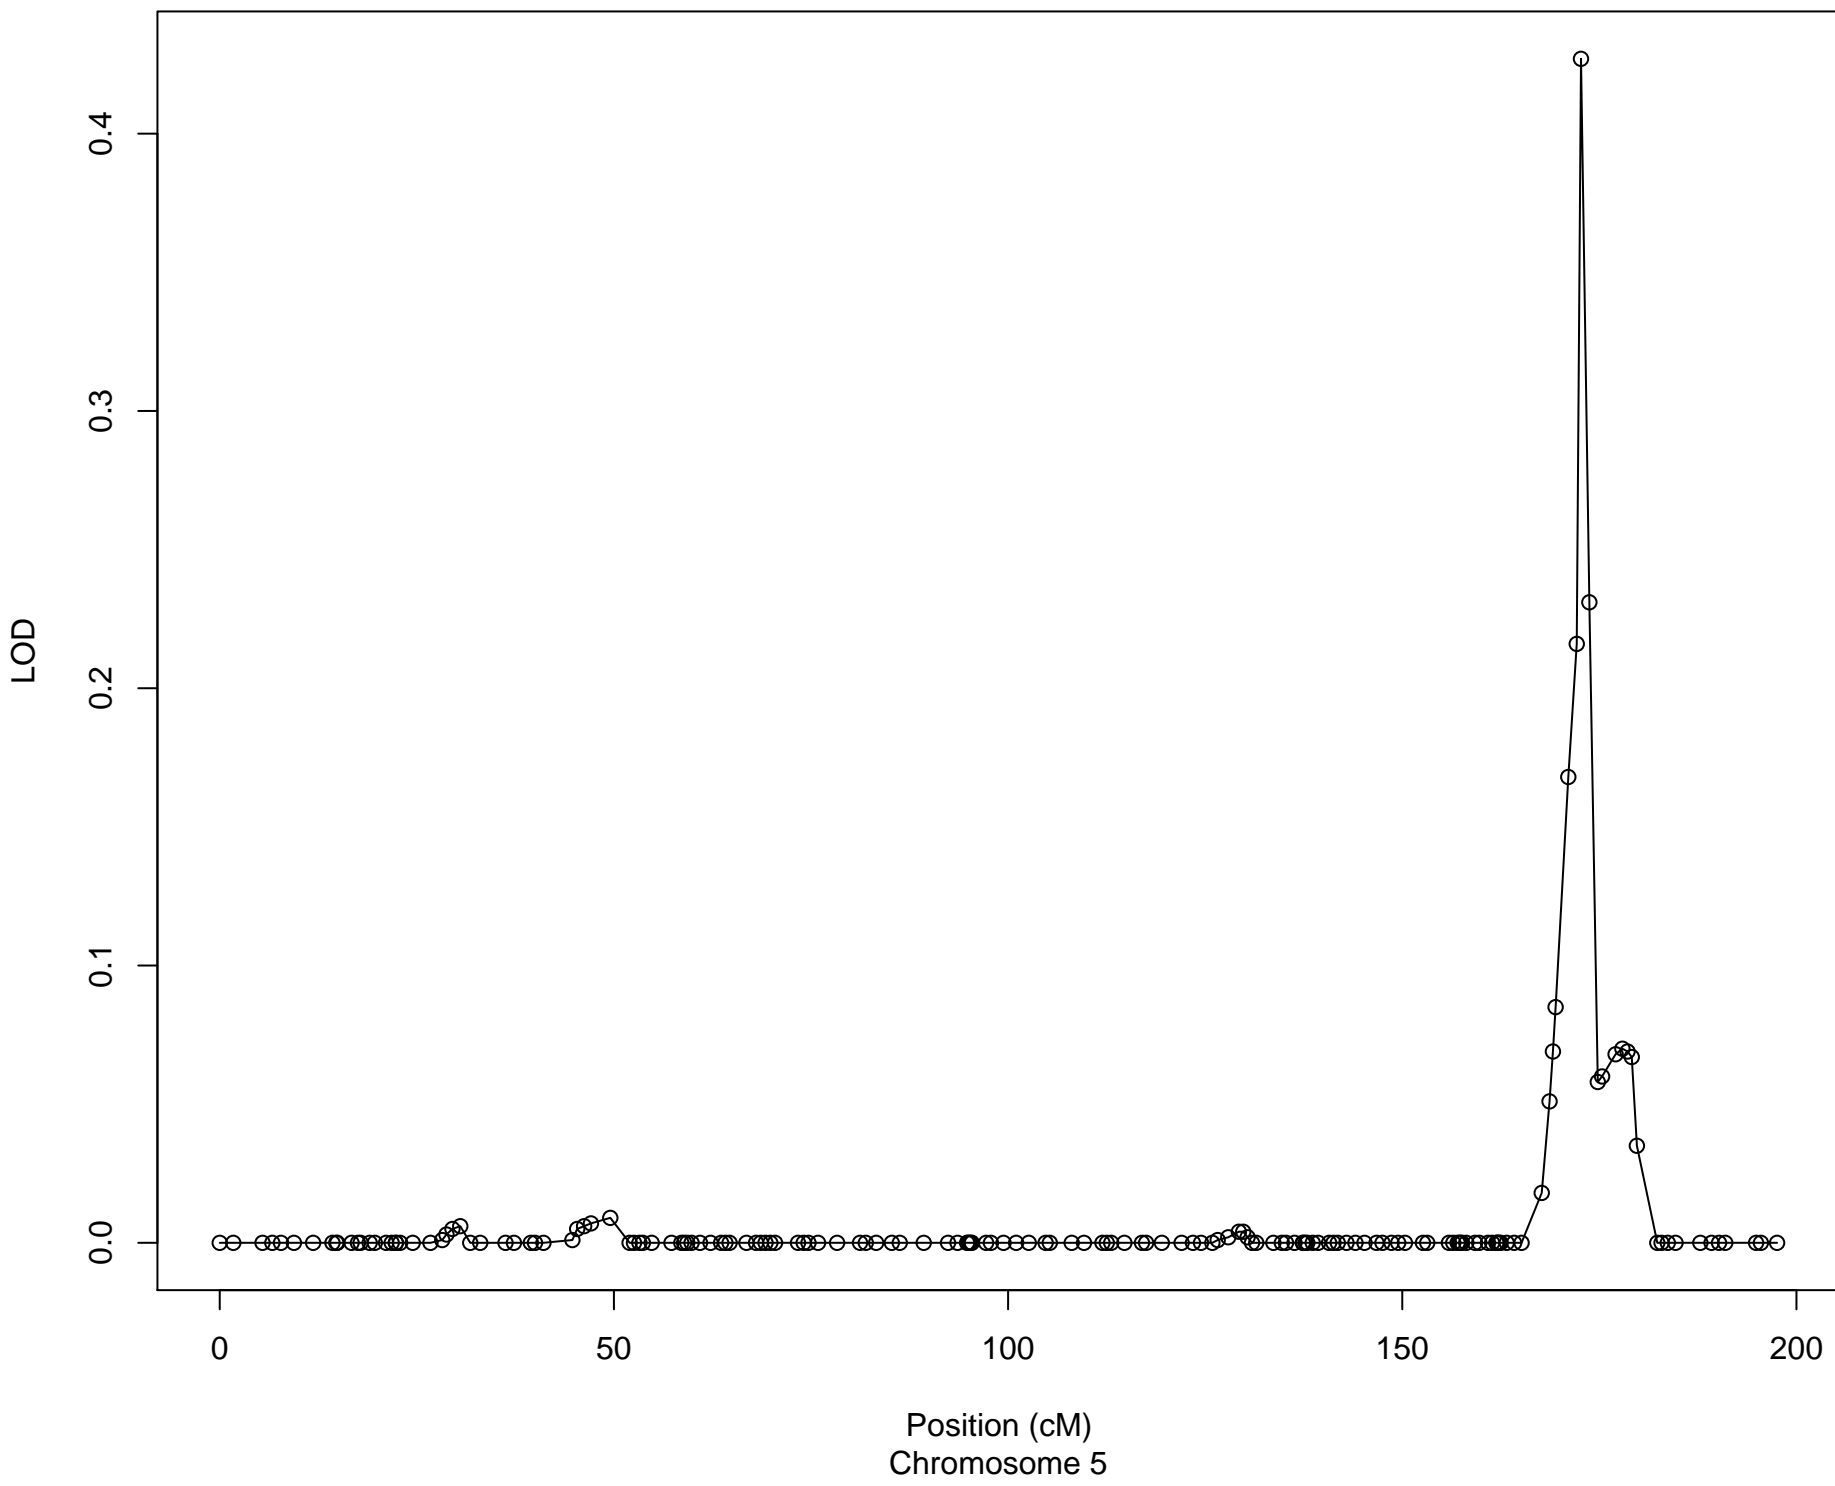

# IC50 (10-hydroxy-camptothecin) (IC50\_hCPT)

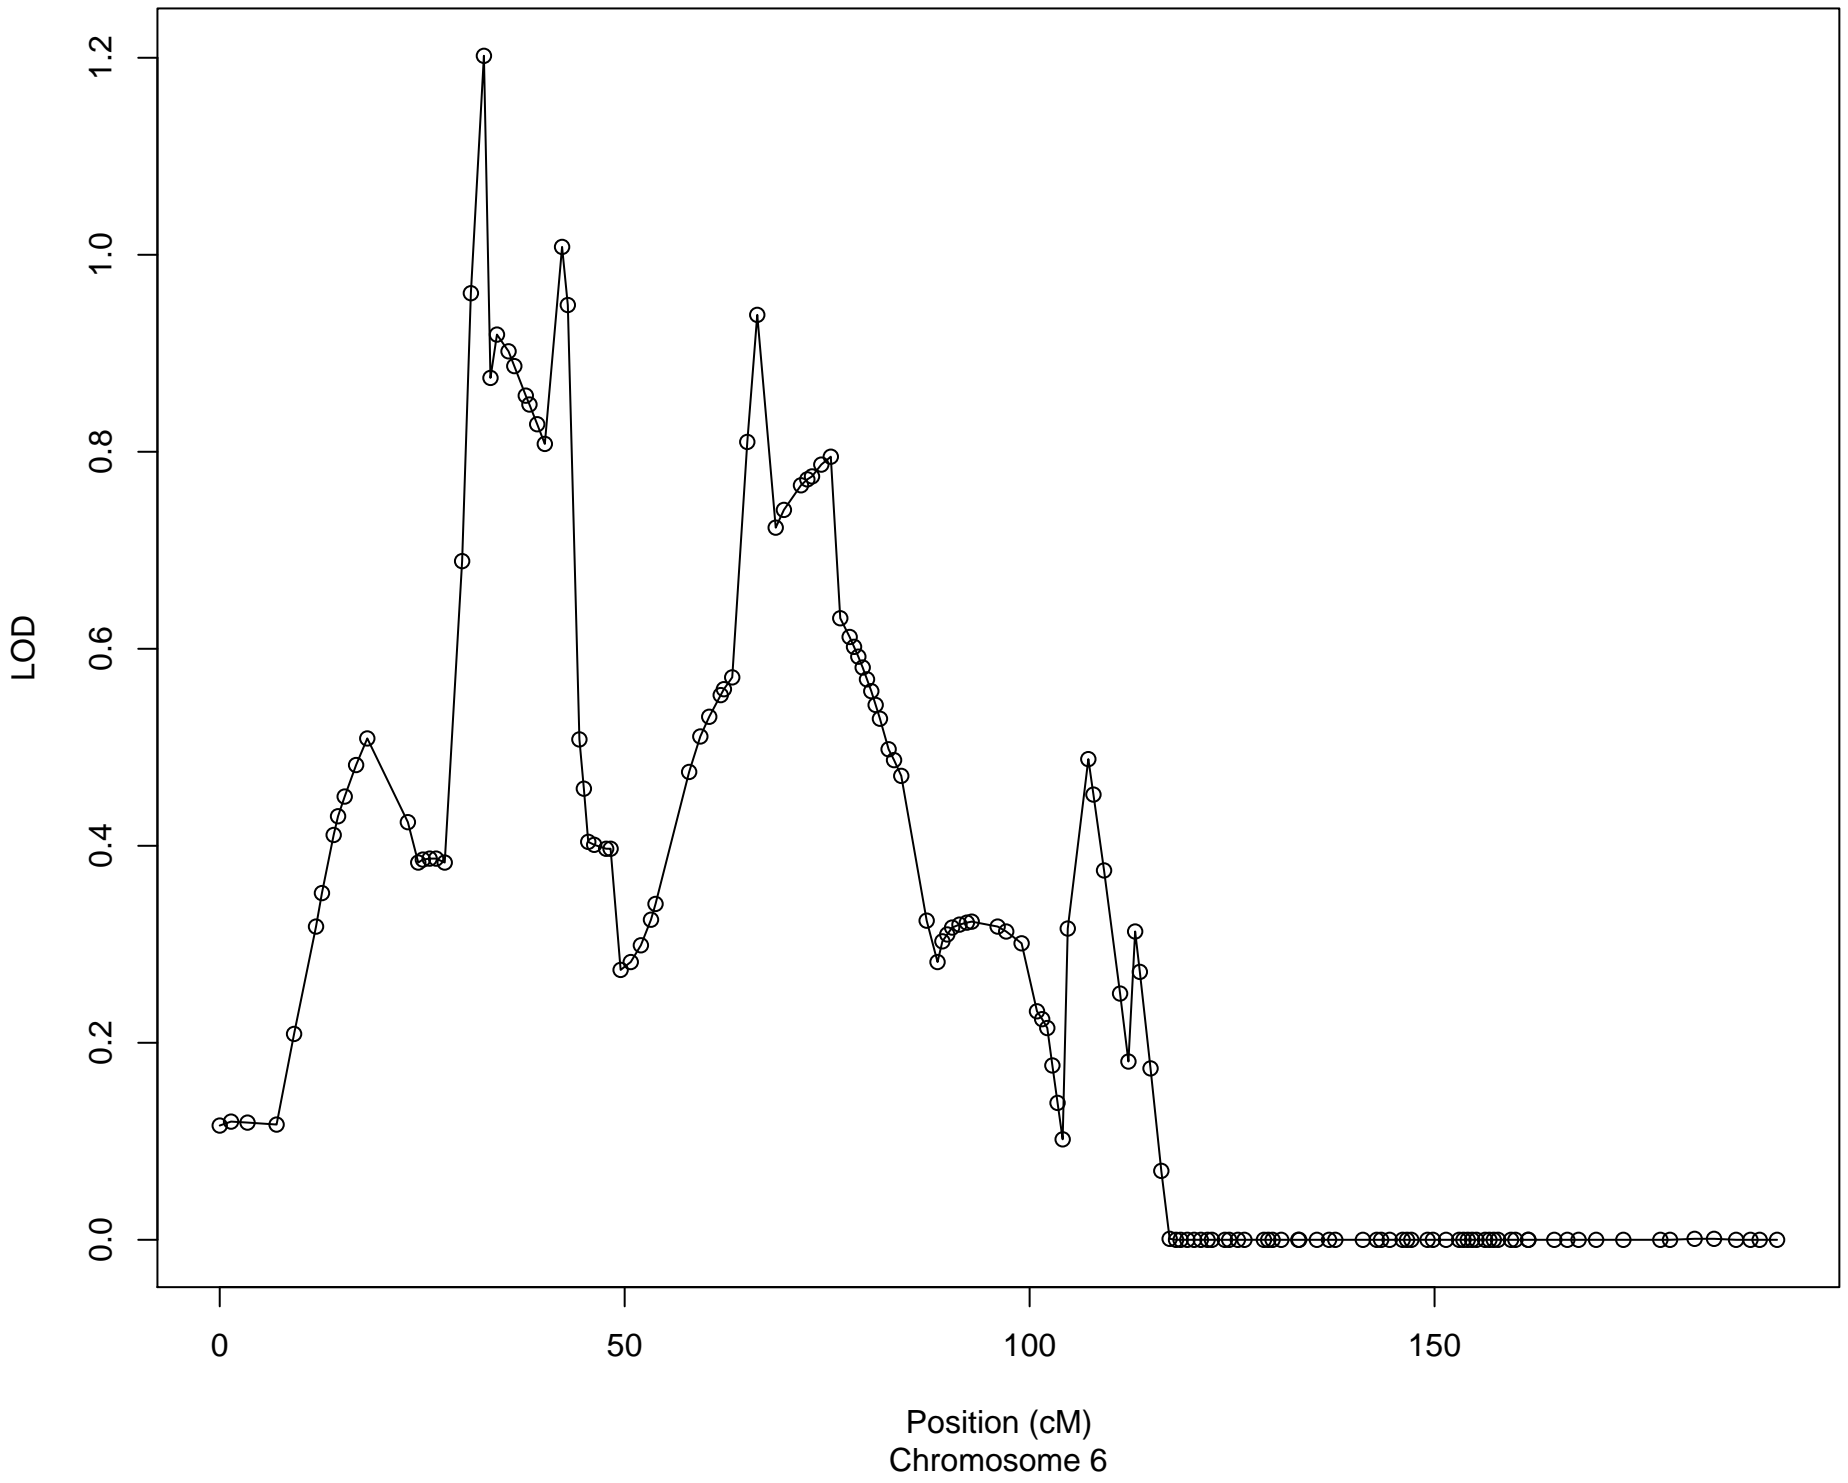



# IC50 (10-hydroxy-camptothecin) (IC50\_hCPT)

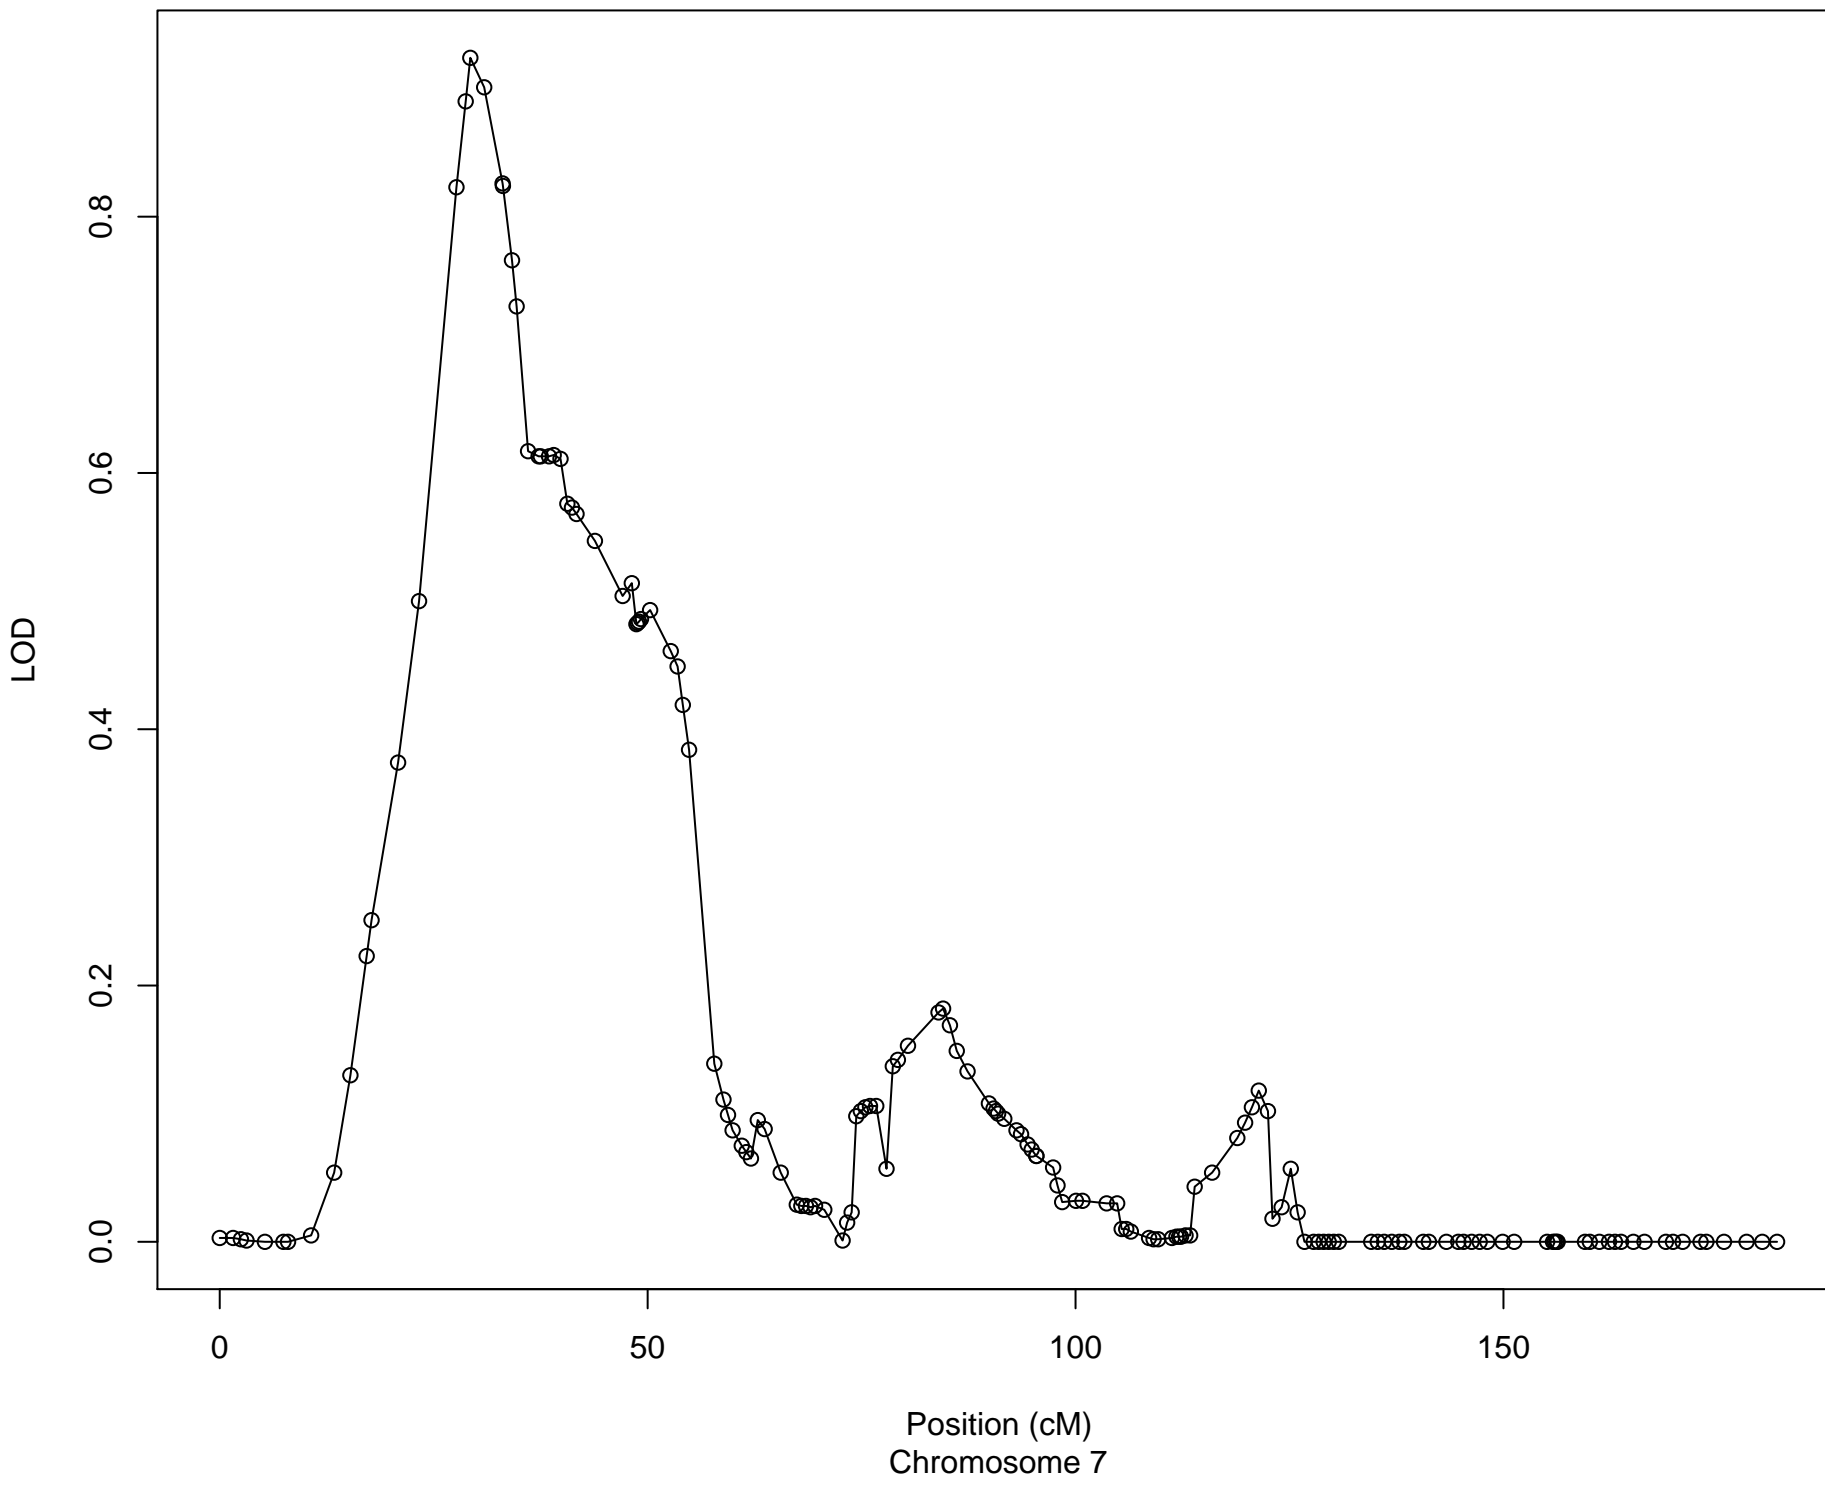

# IC50 (10-hydroxy-camptothecin) (IC50\_hCPT)

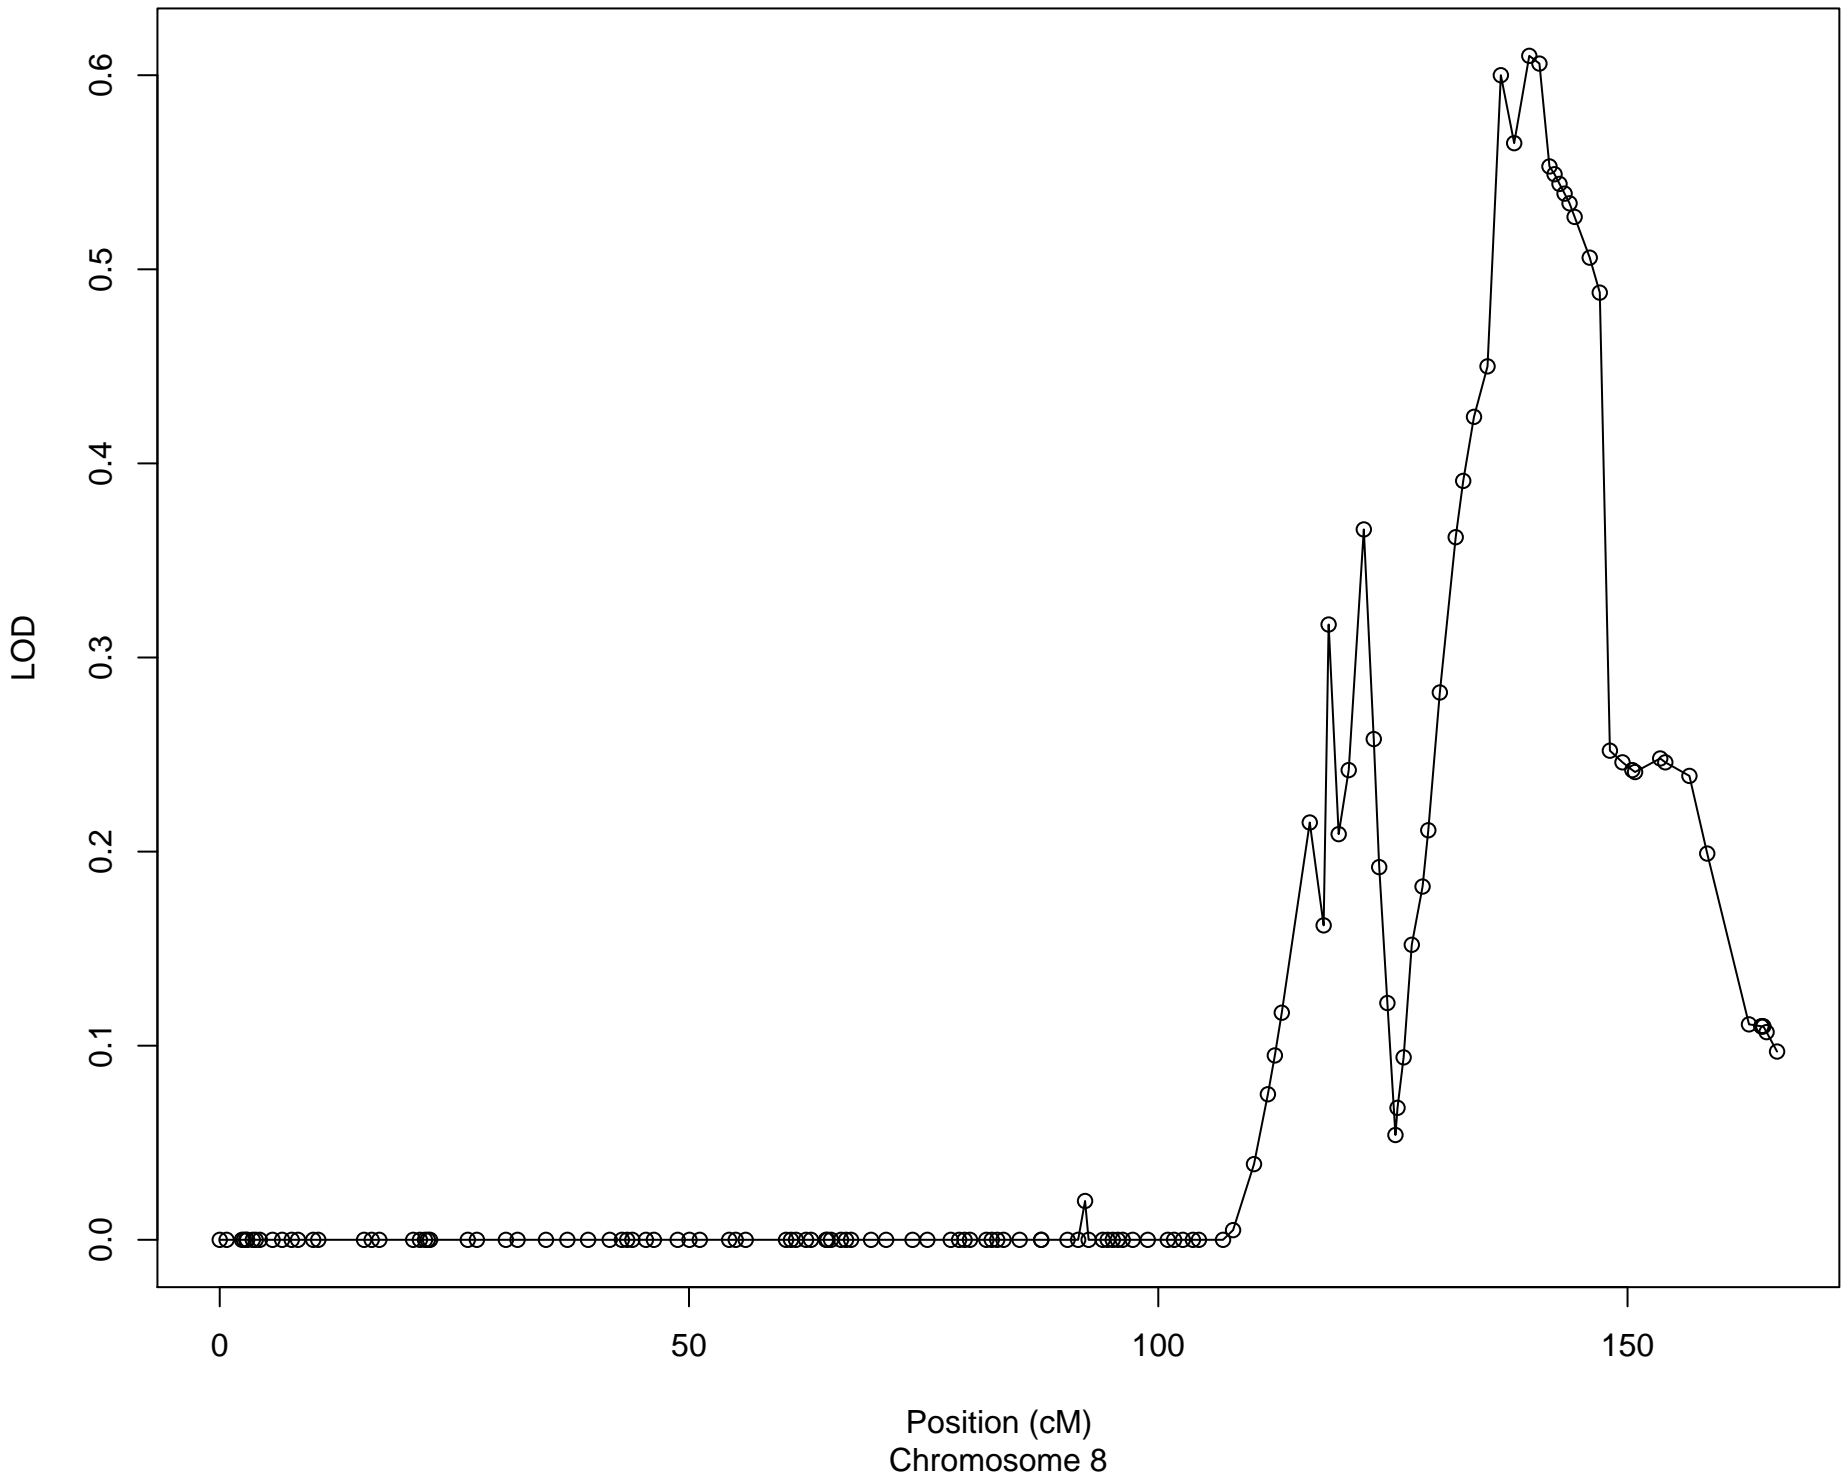

# IC50 (10-hydroxy-camptothecin) (IC50\_hCPT)

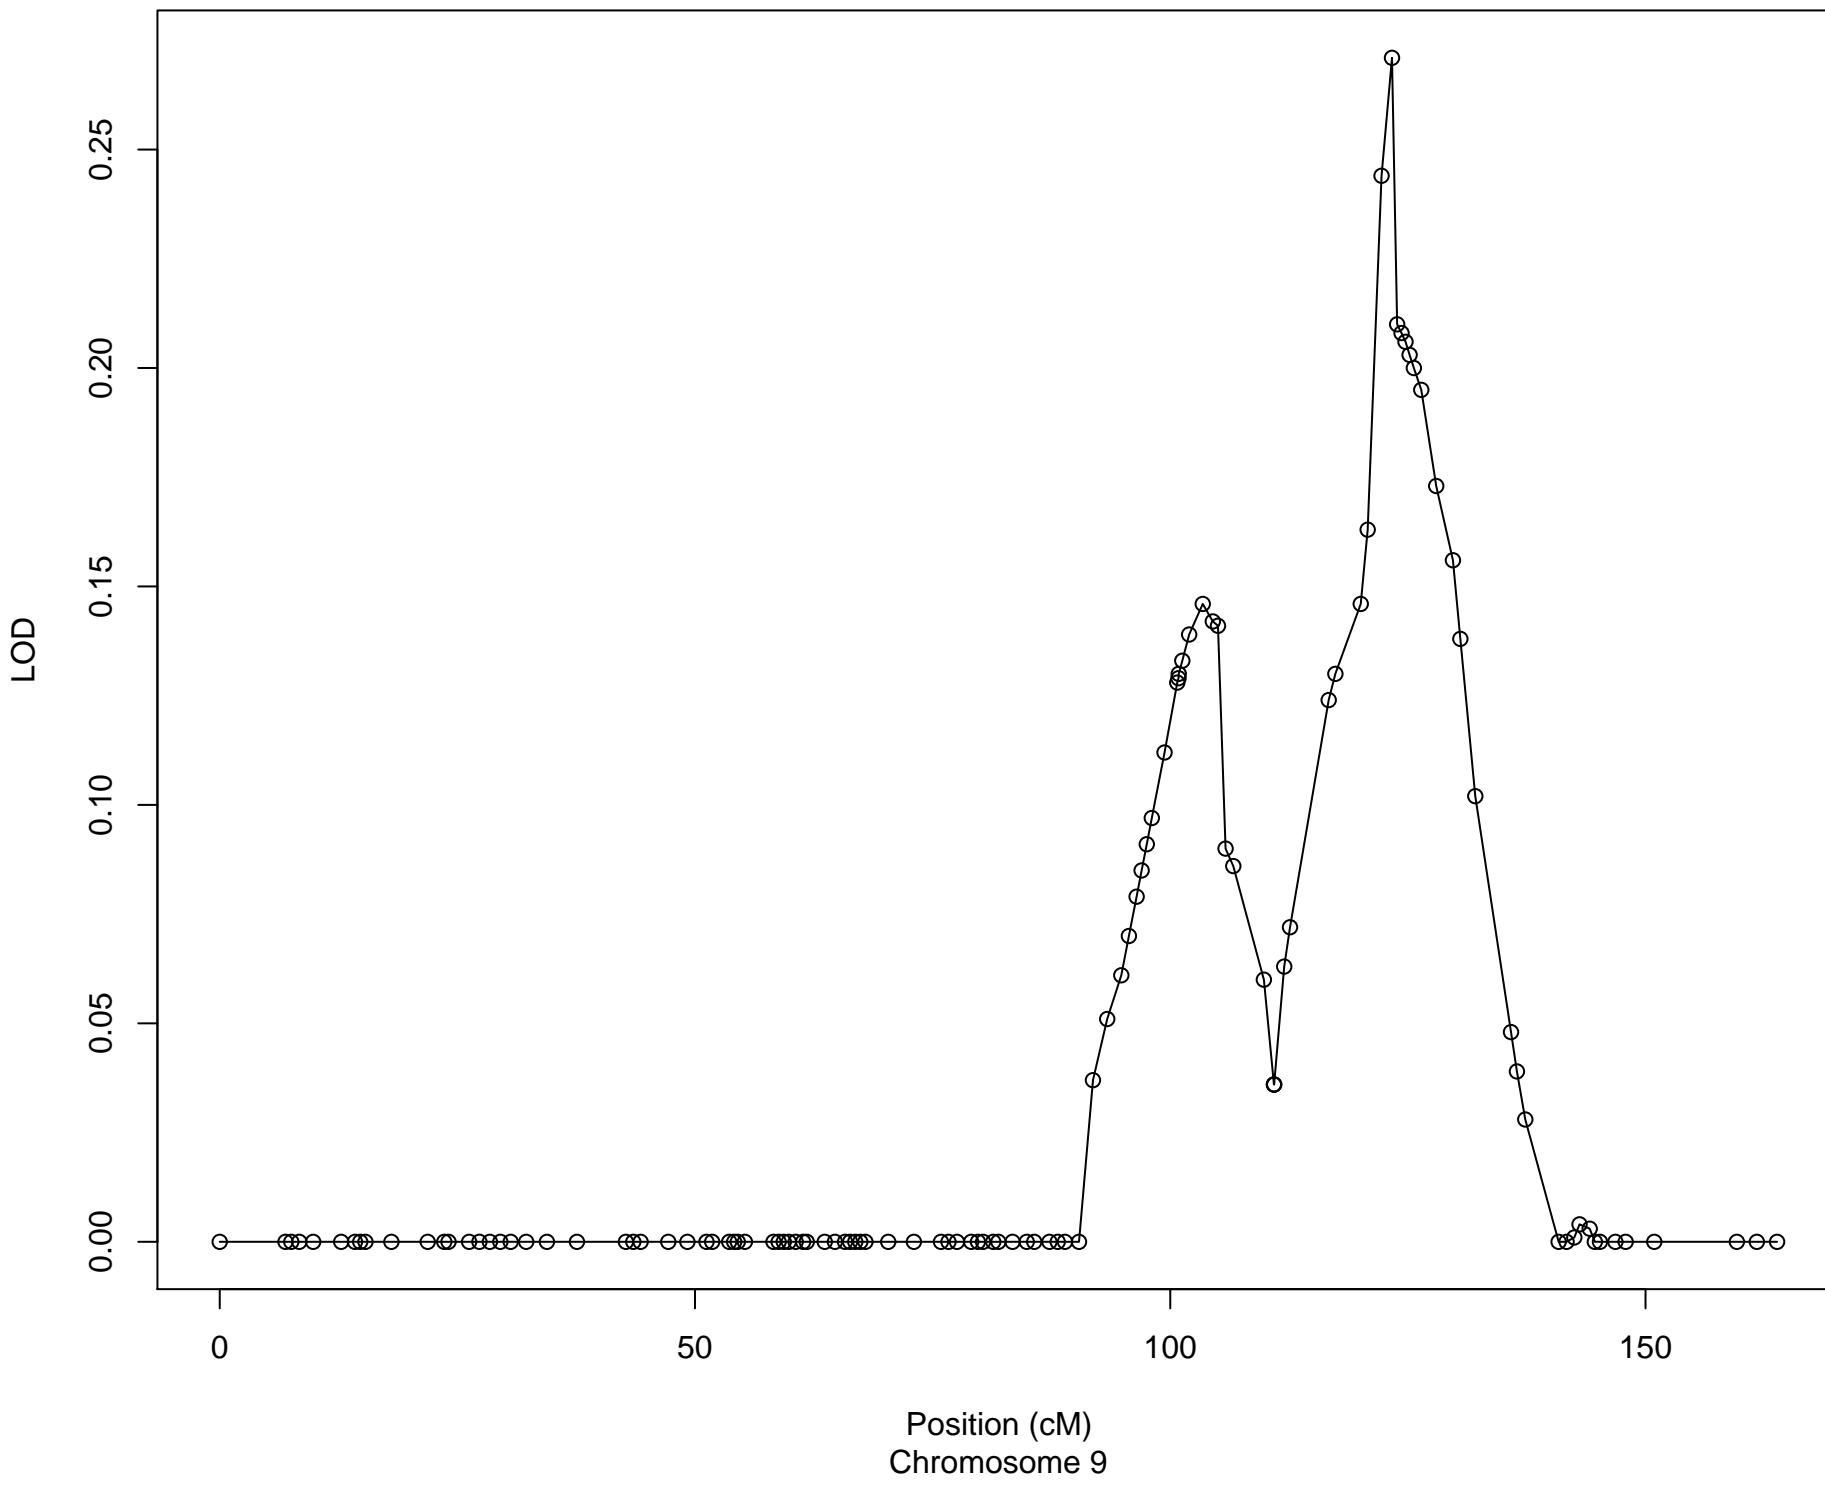

# IC50 (10-hydroxy-camptothecin) (IC50\_hCPT)

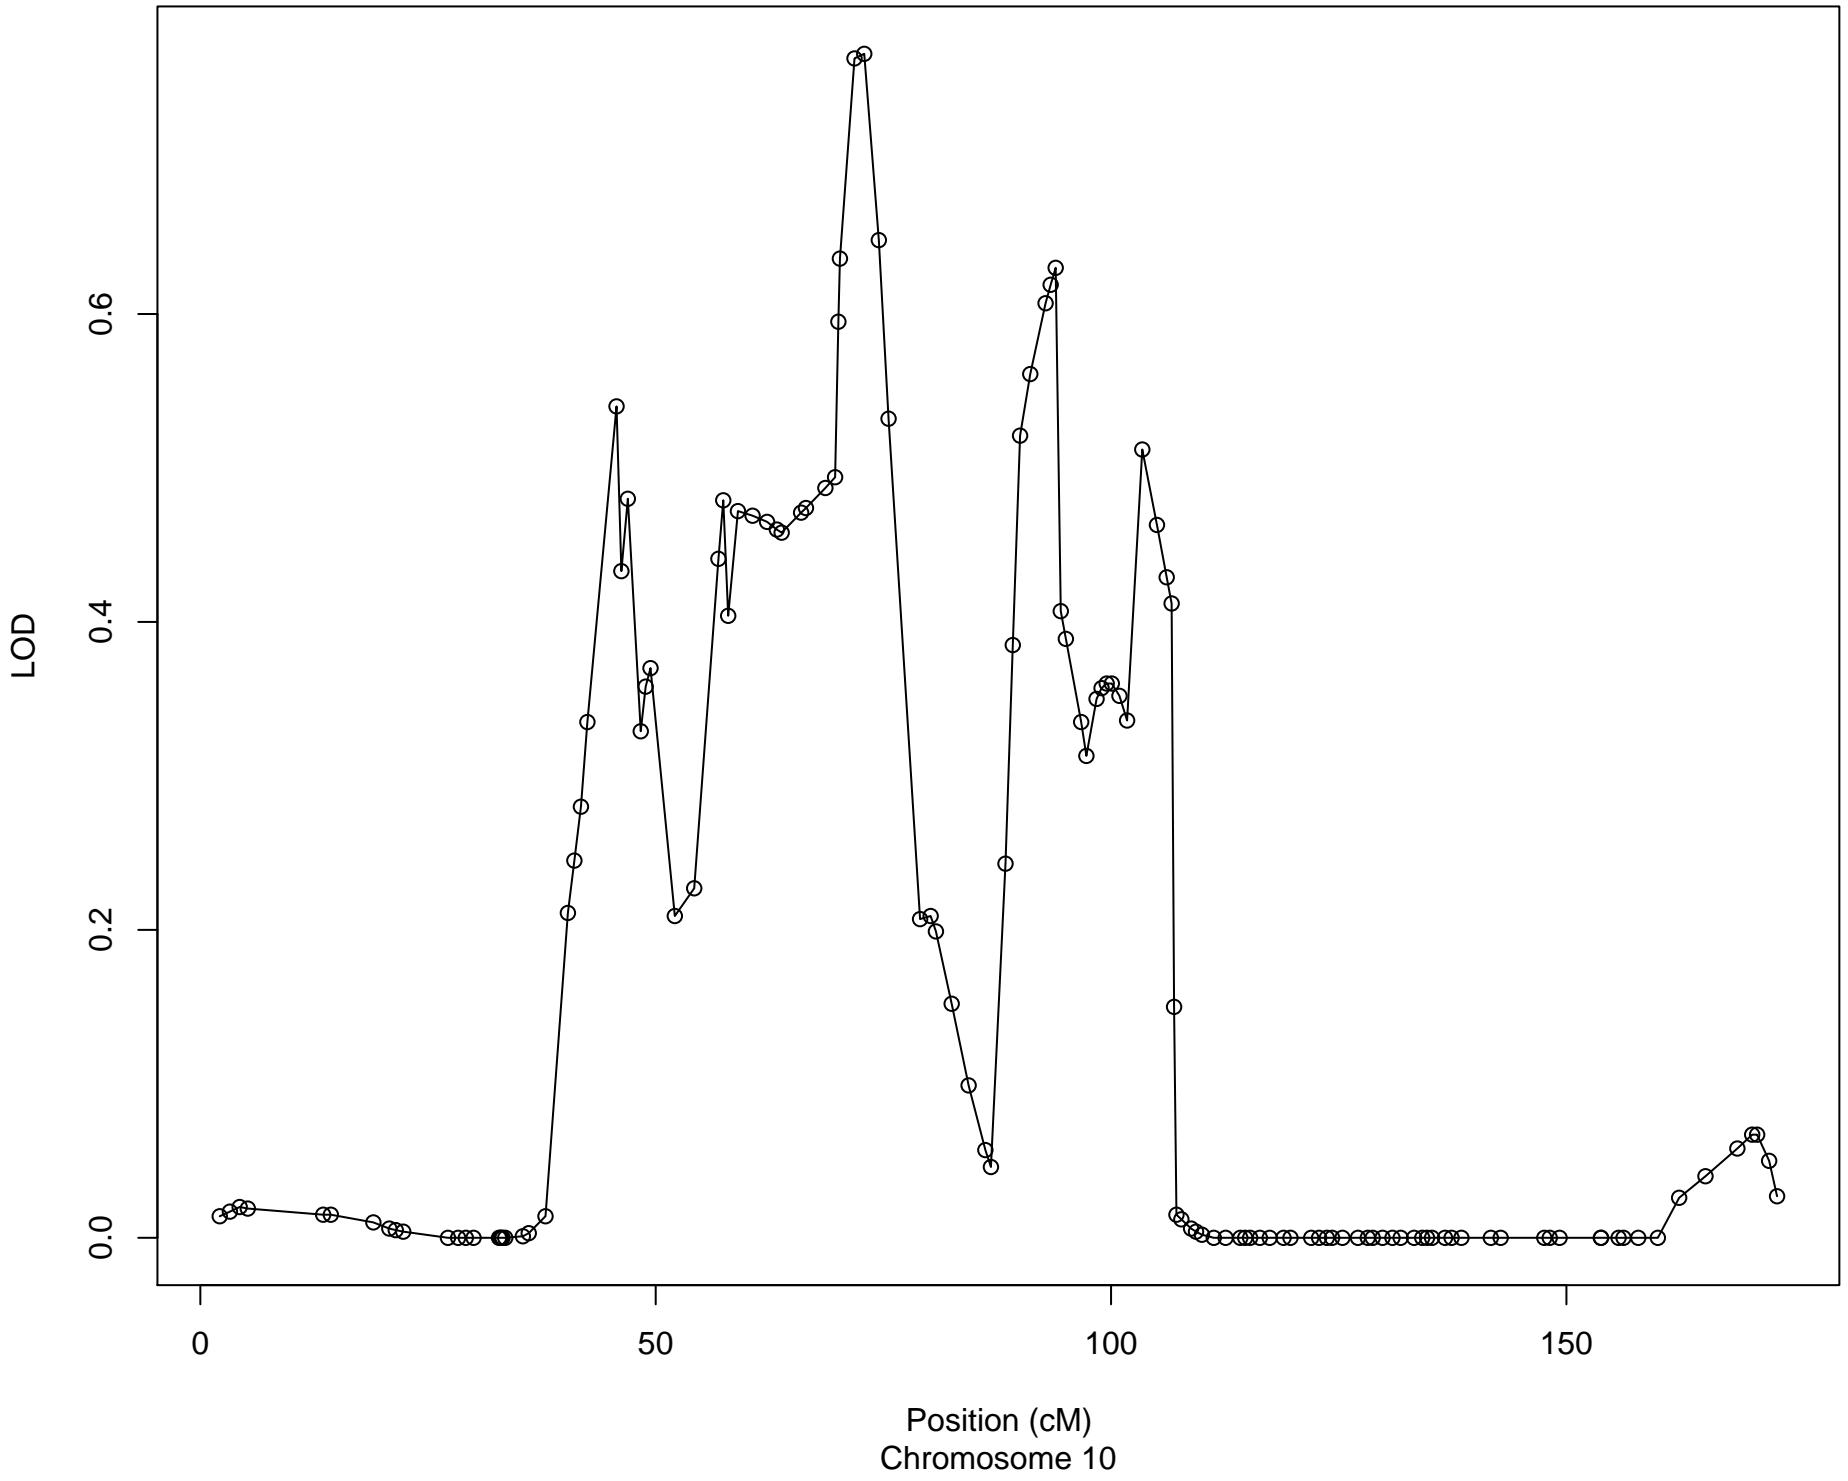

# IC50 (10-hydroxy-camptothecin) (IC50\_hCPT)

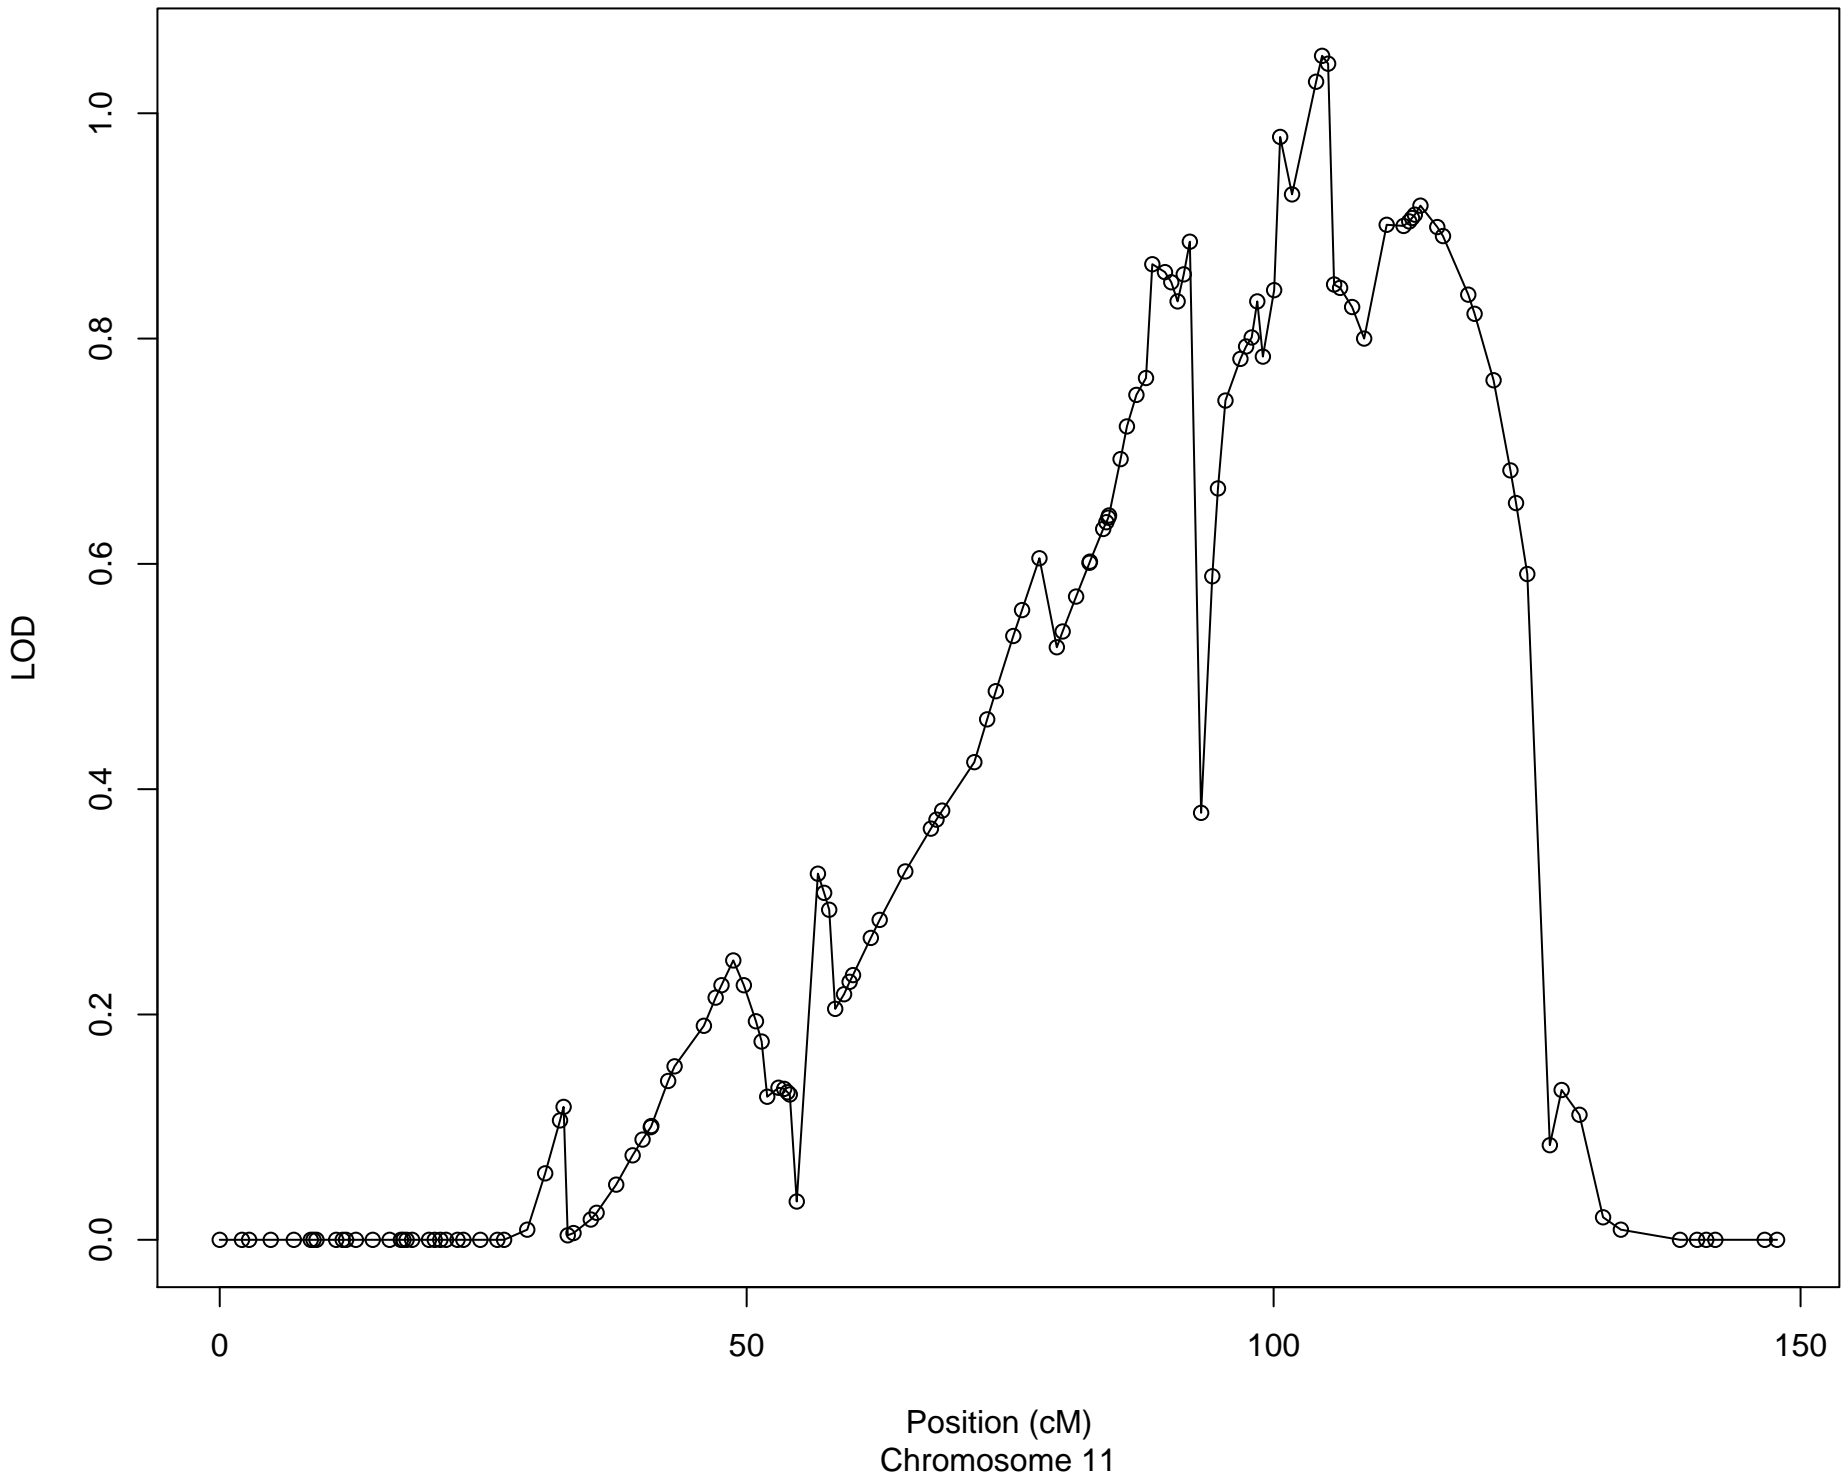

# IC50 (10-hydroxy-camptothecin) (IC50\_hCPT)

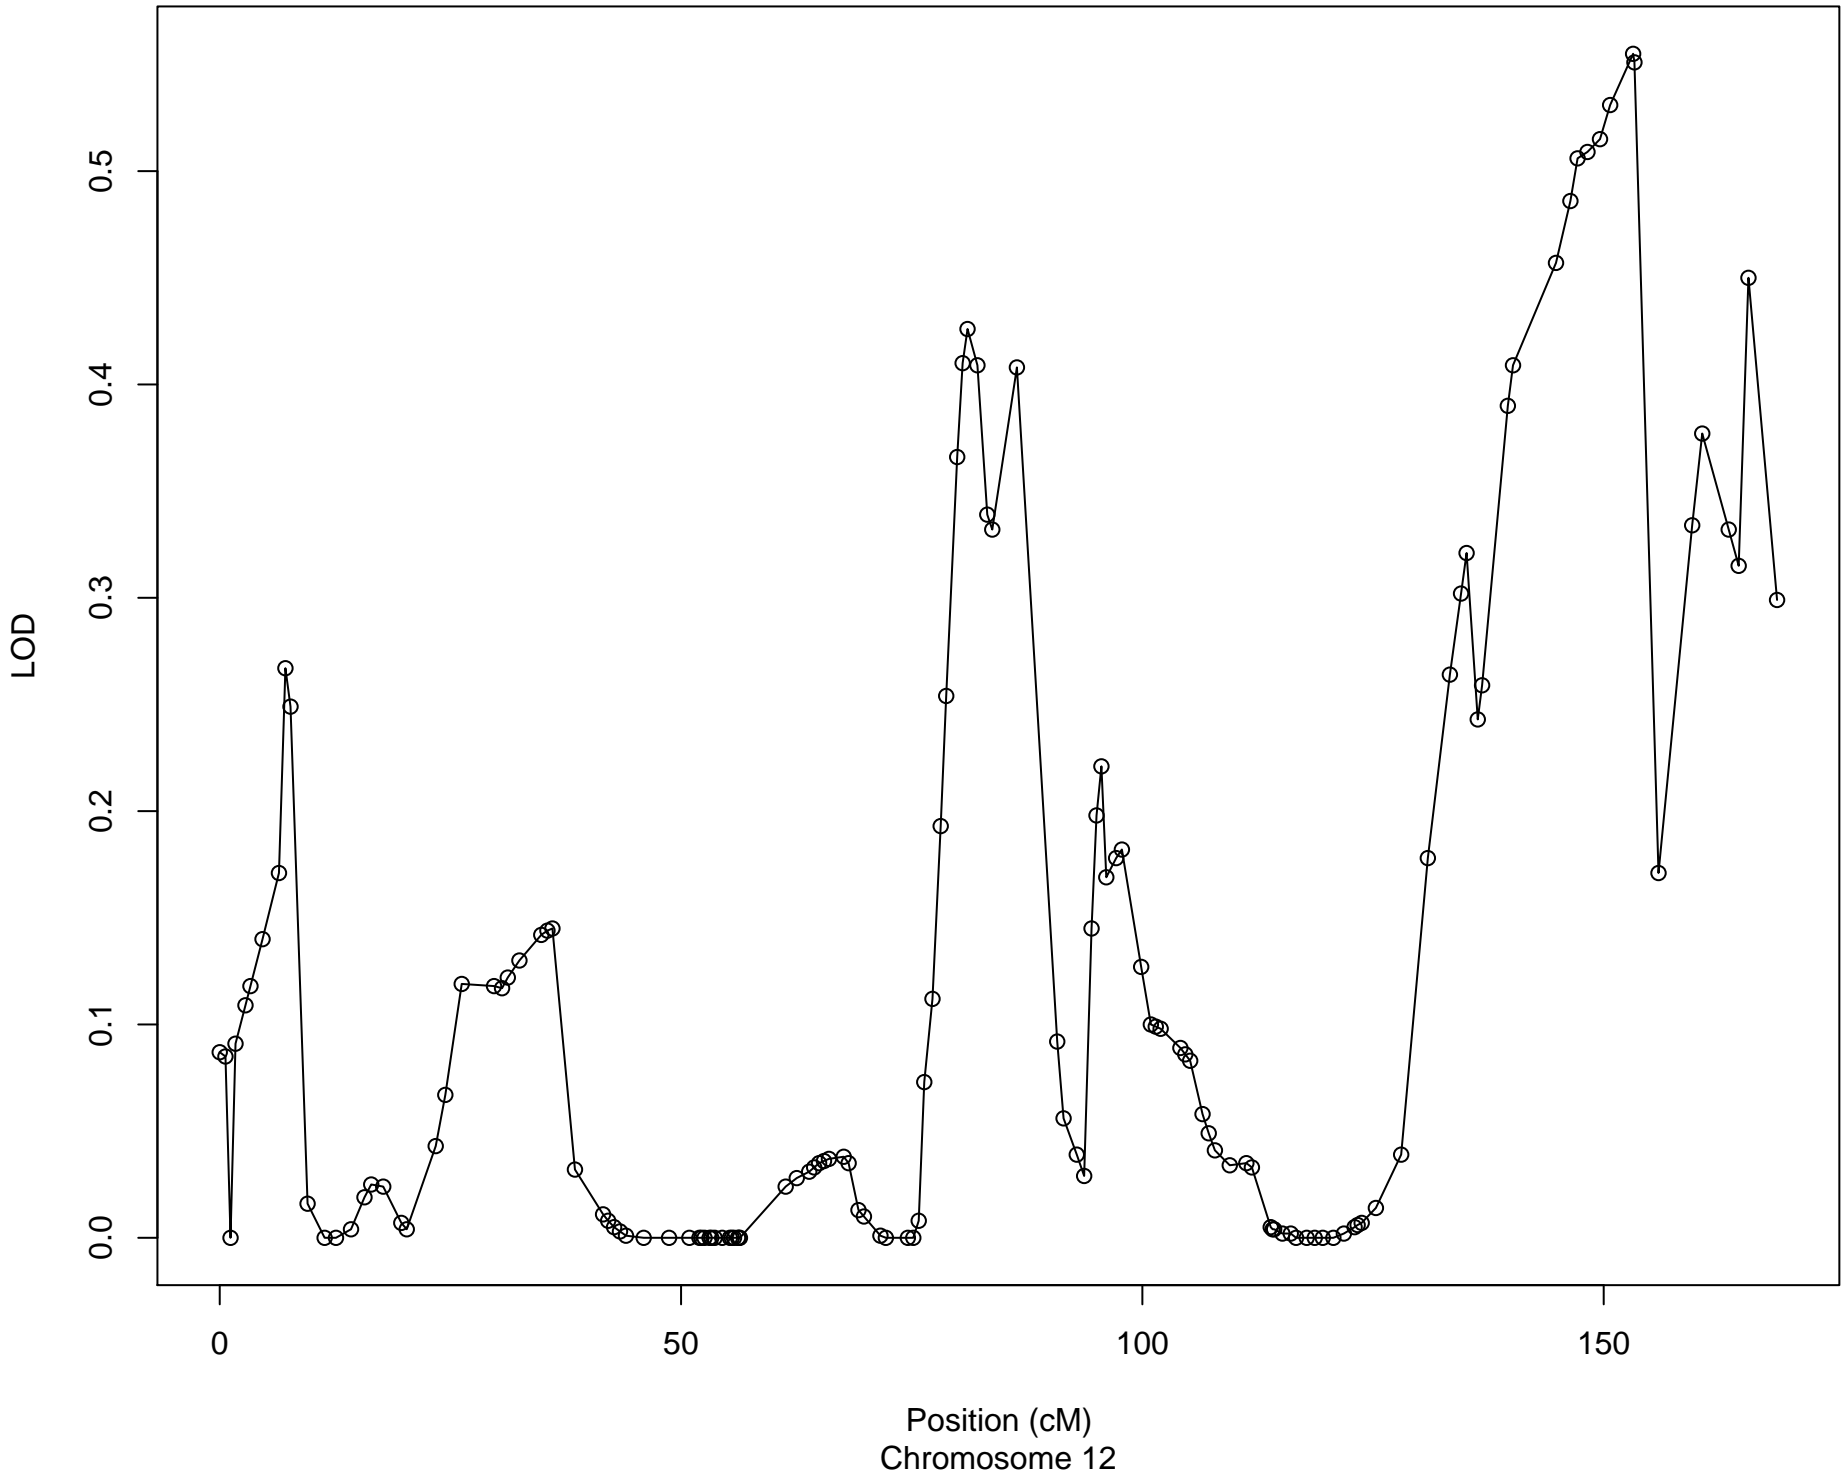

# IC50 (10-hydroxy-camptothecin) (IC50\_hCPT)

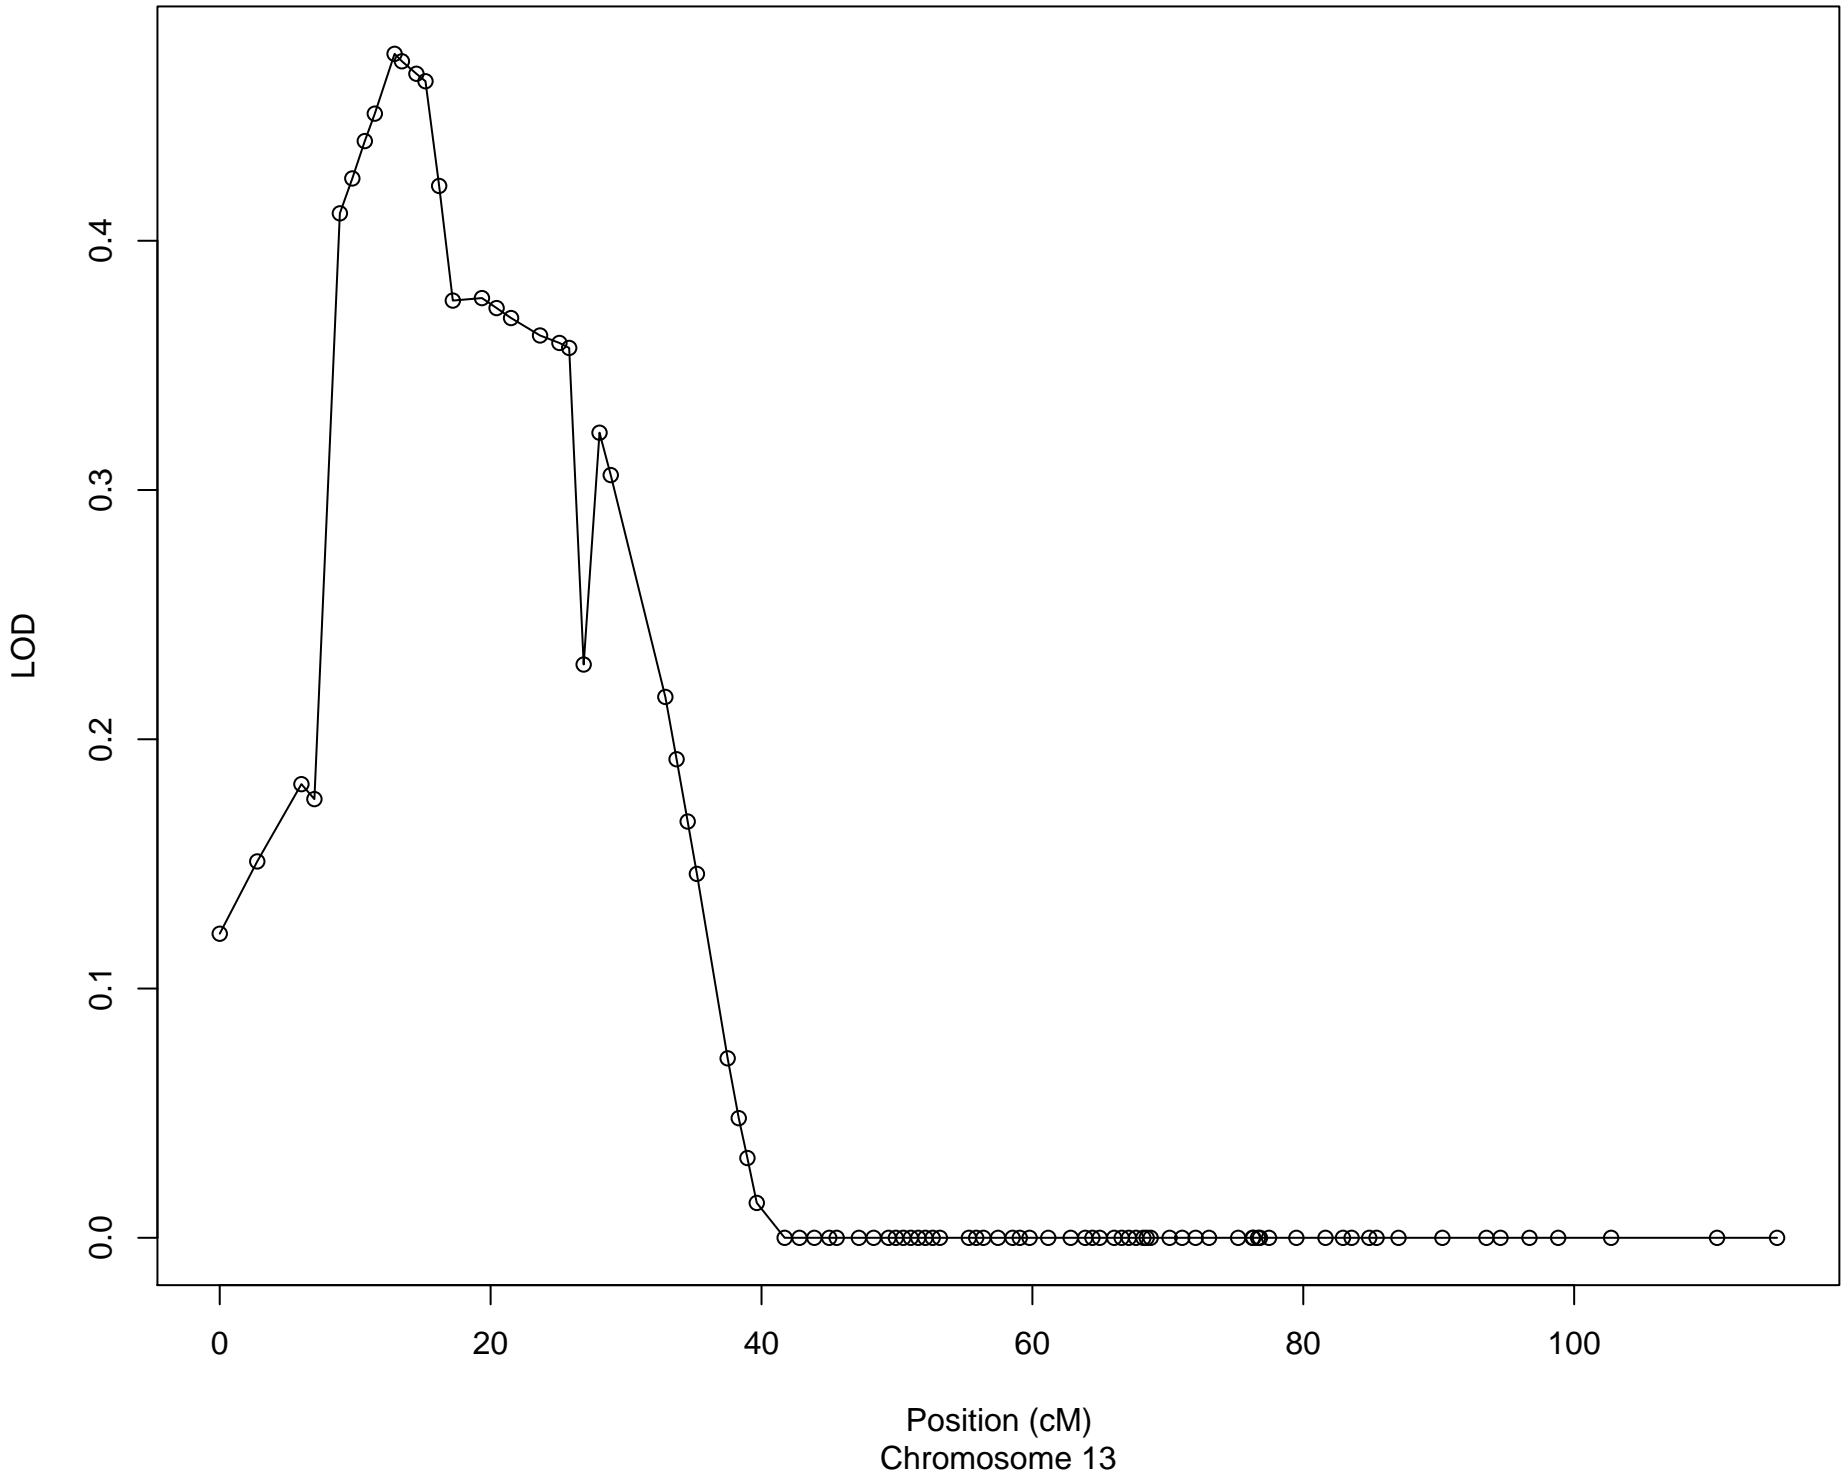

# IC50 (10-hydroxy-camptothecin) (IC50\_hCPT)

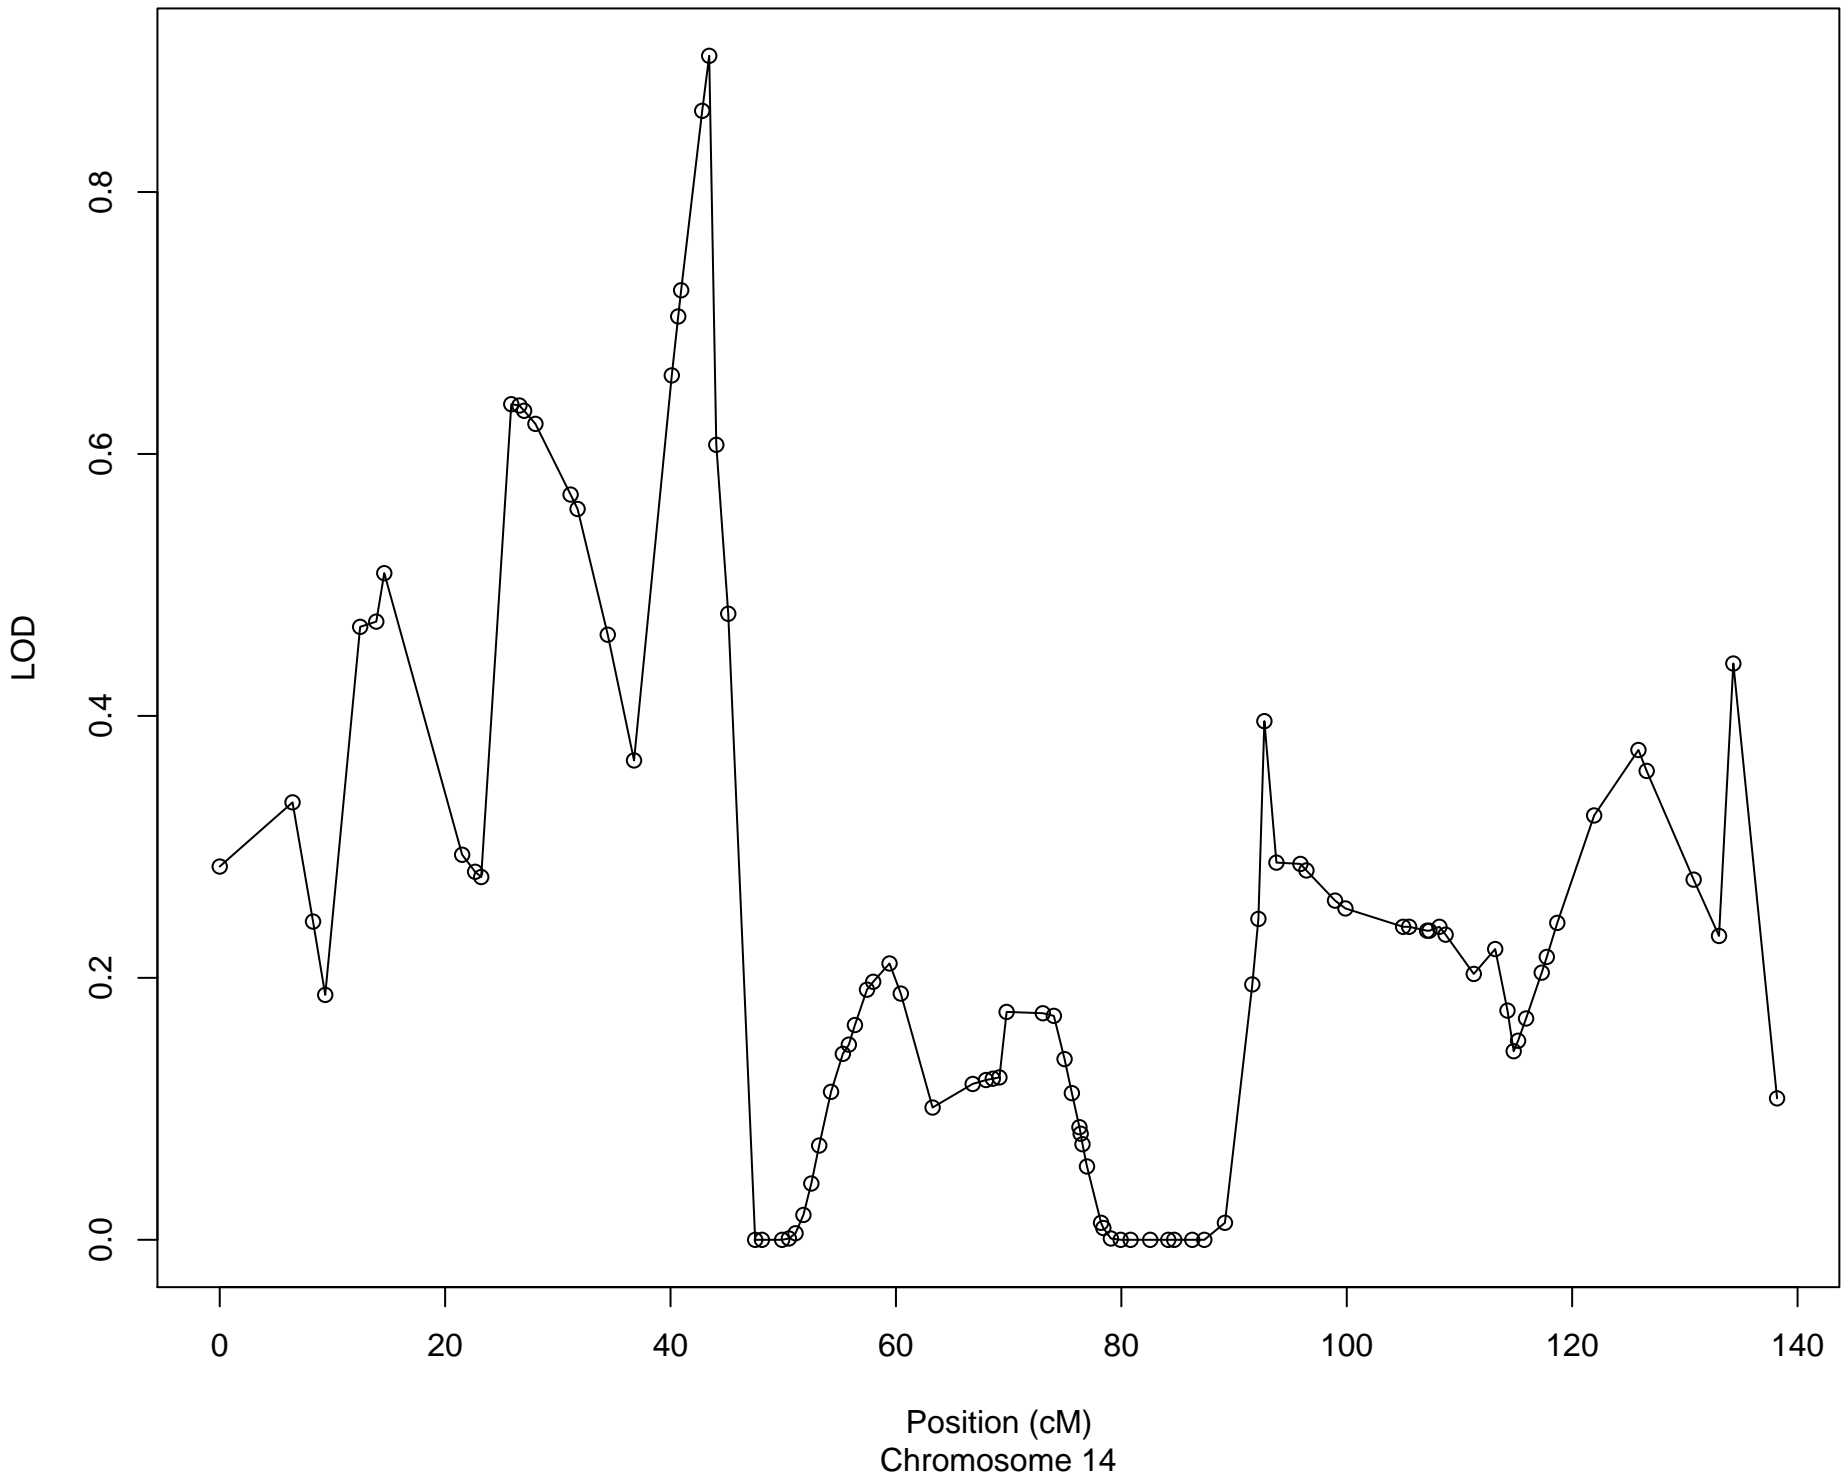



# IC50 (10-hydroxy-camptothecin) (IC50\_hCPT)

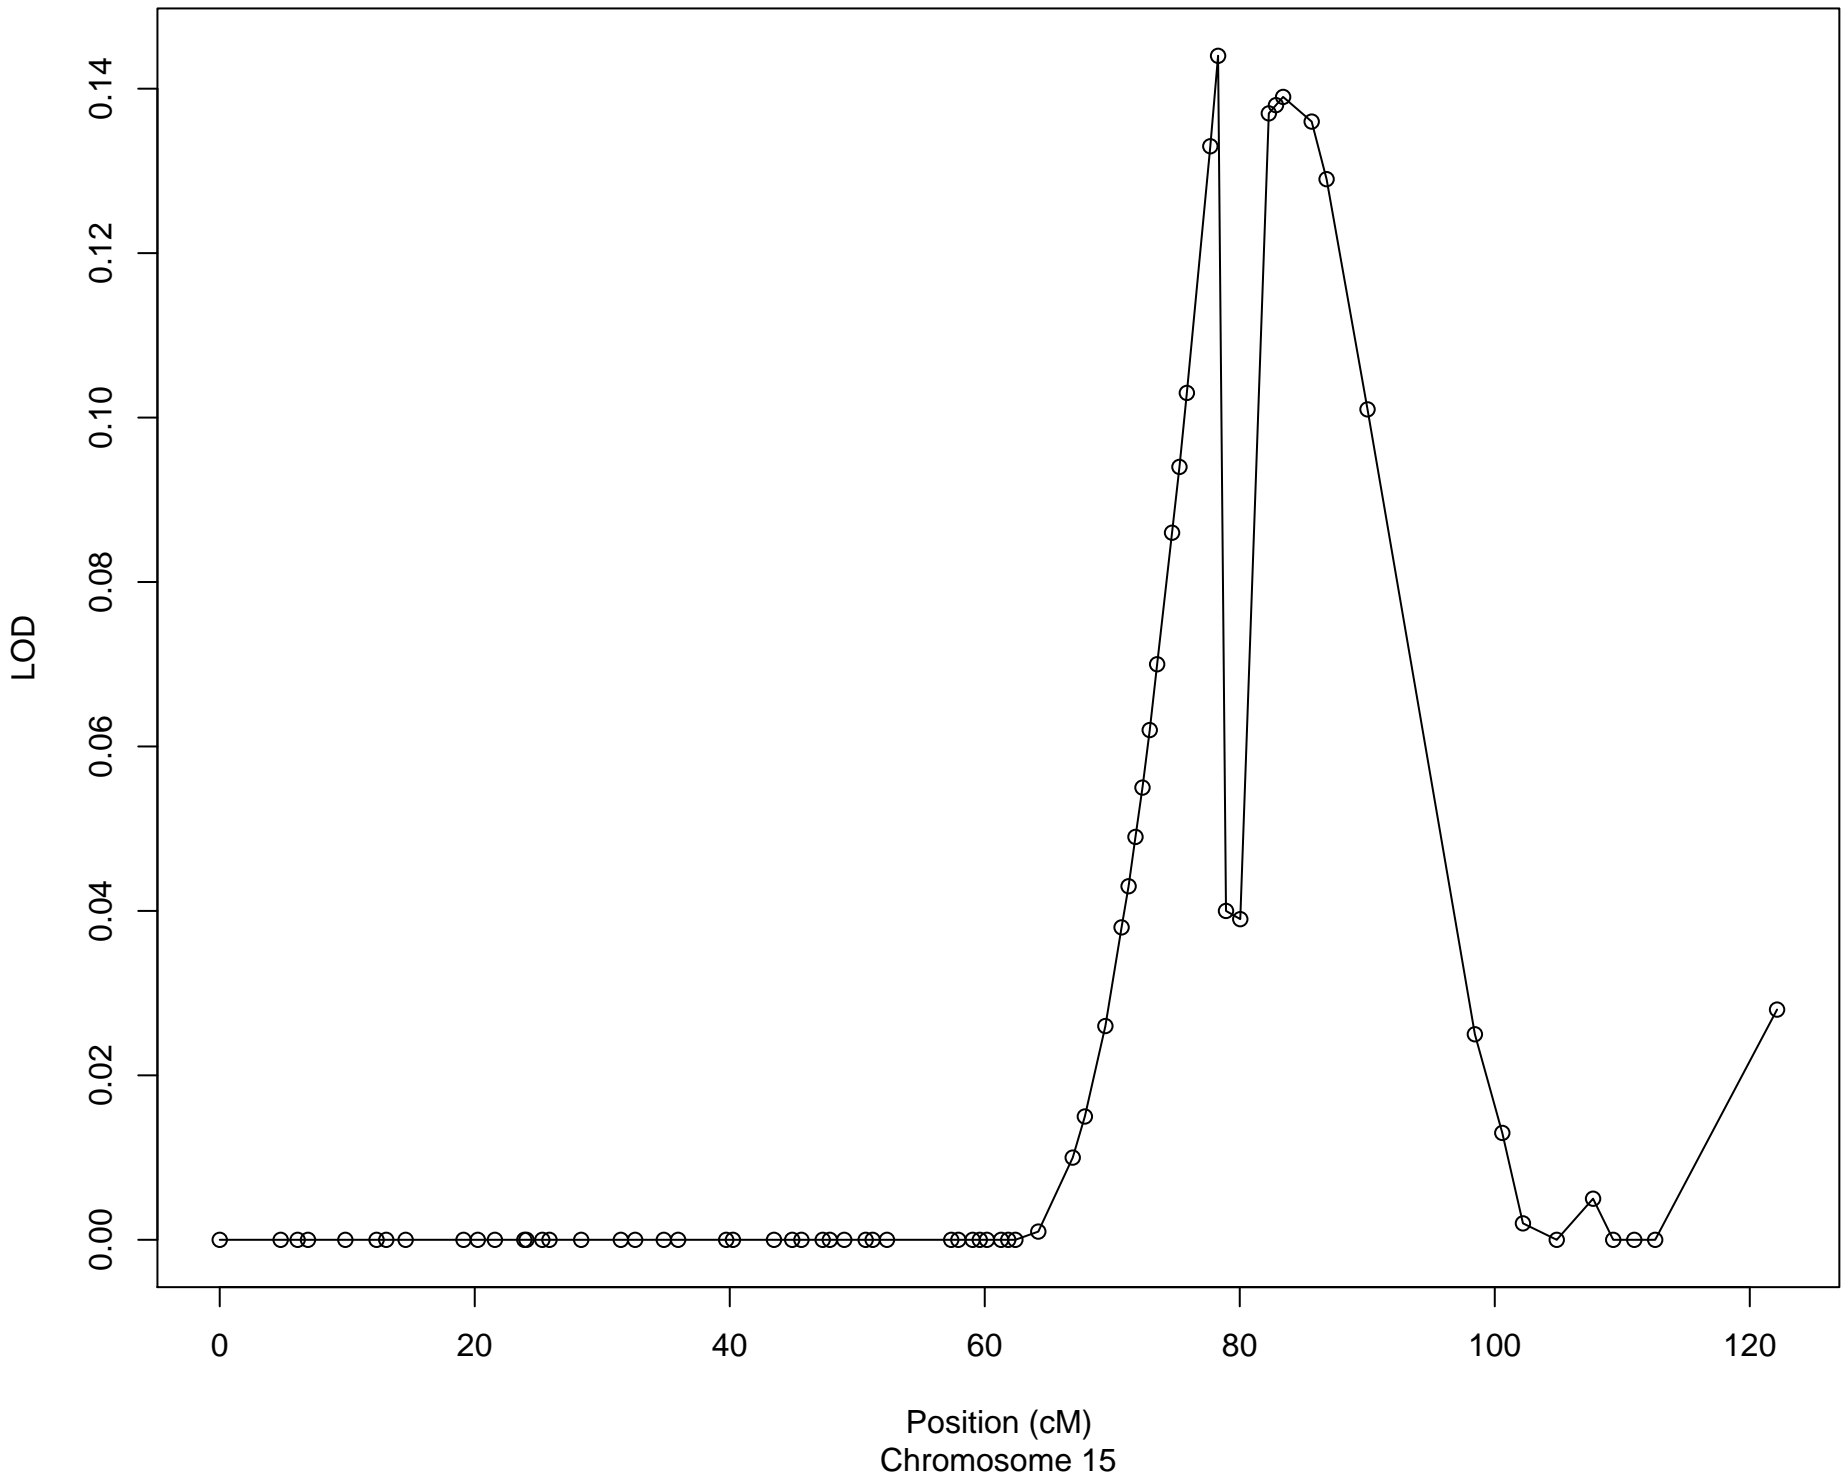

# IC50 (10-hydroxy-camptothecin) (IC50\_hCPT)

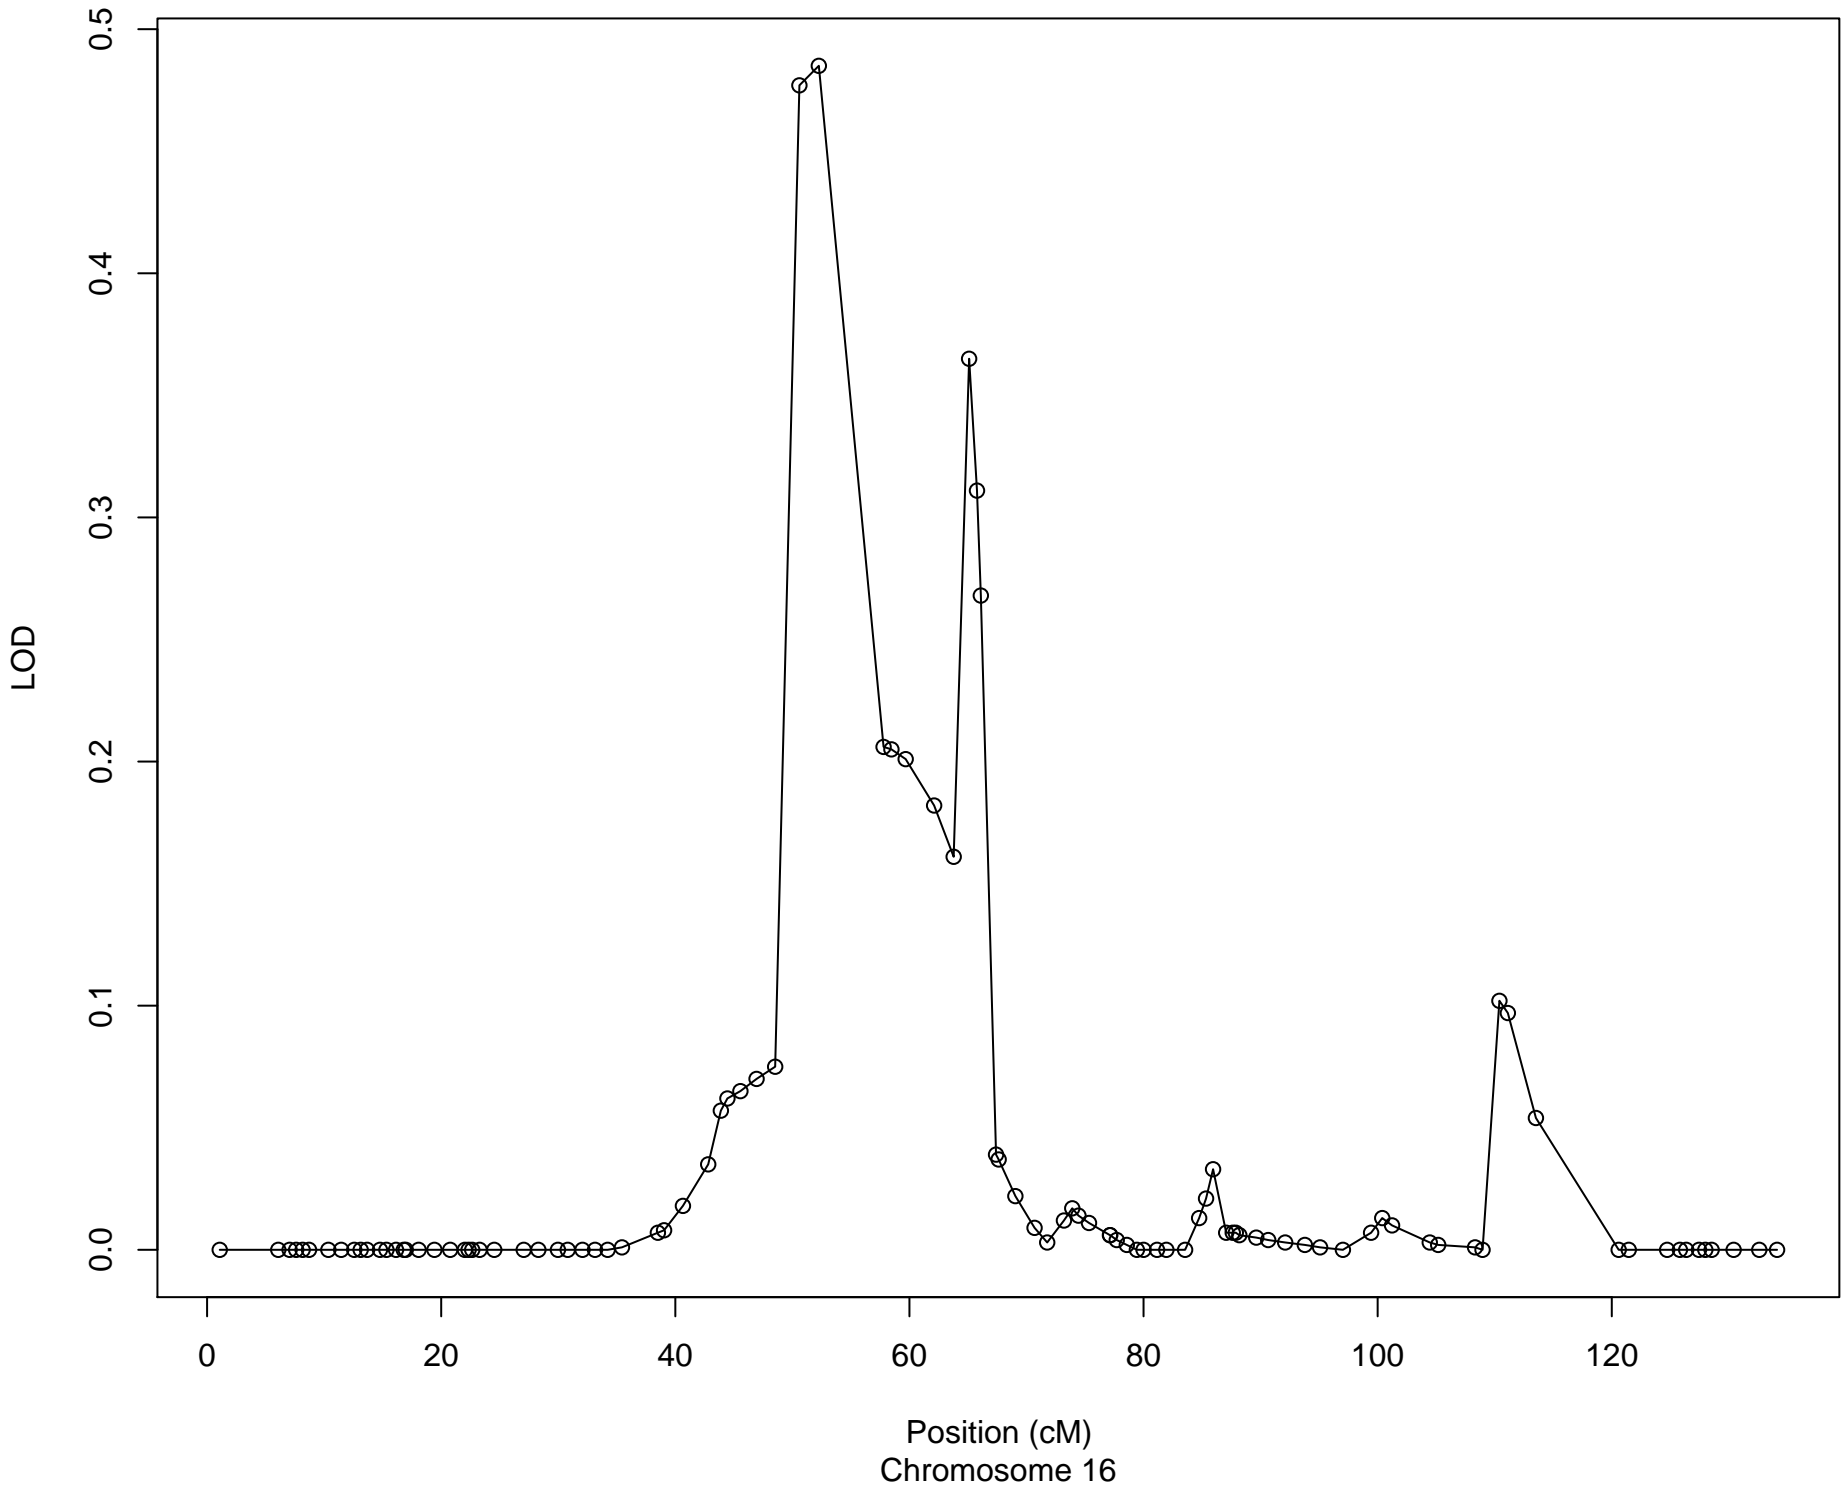

# IC50 (10-hydroxy-camptothecin) (IC50\_hCPT)

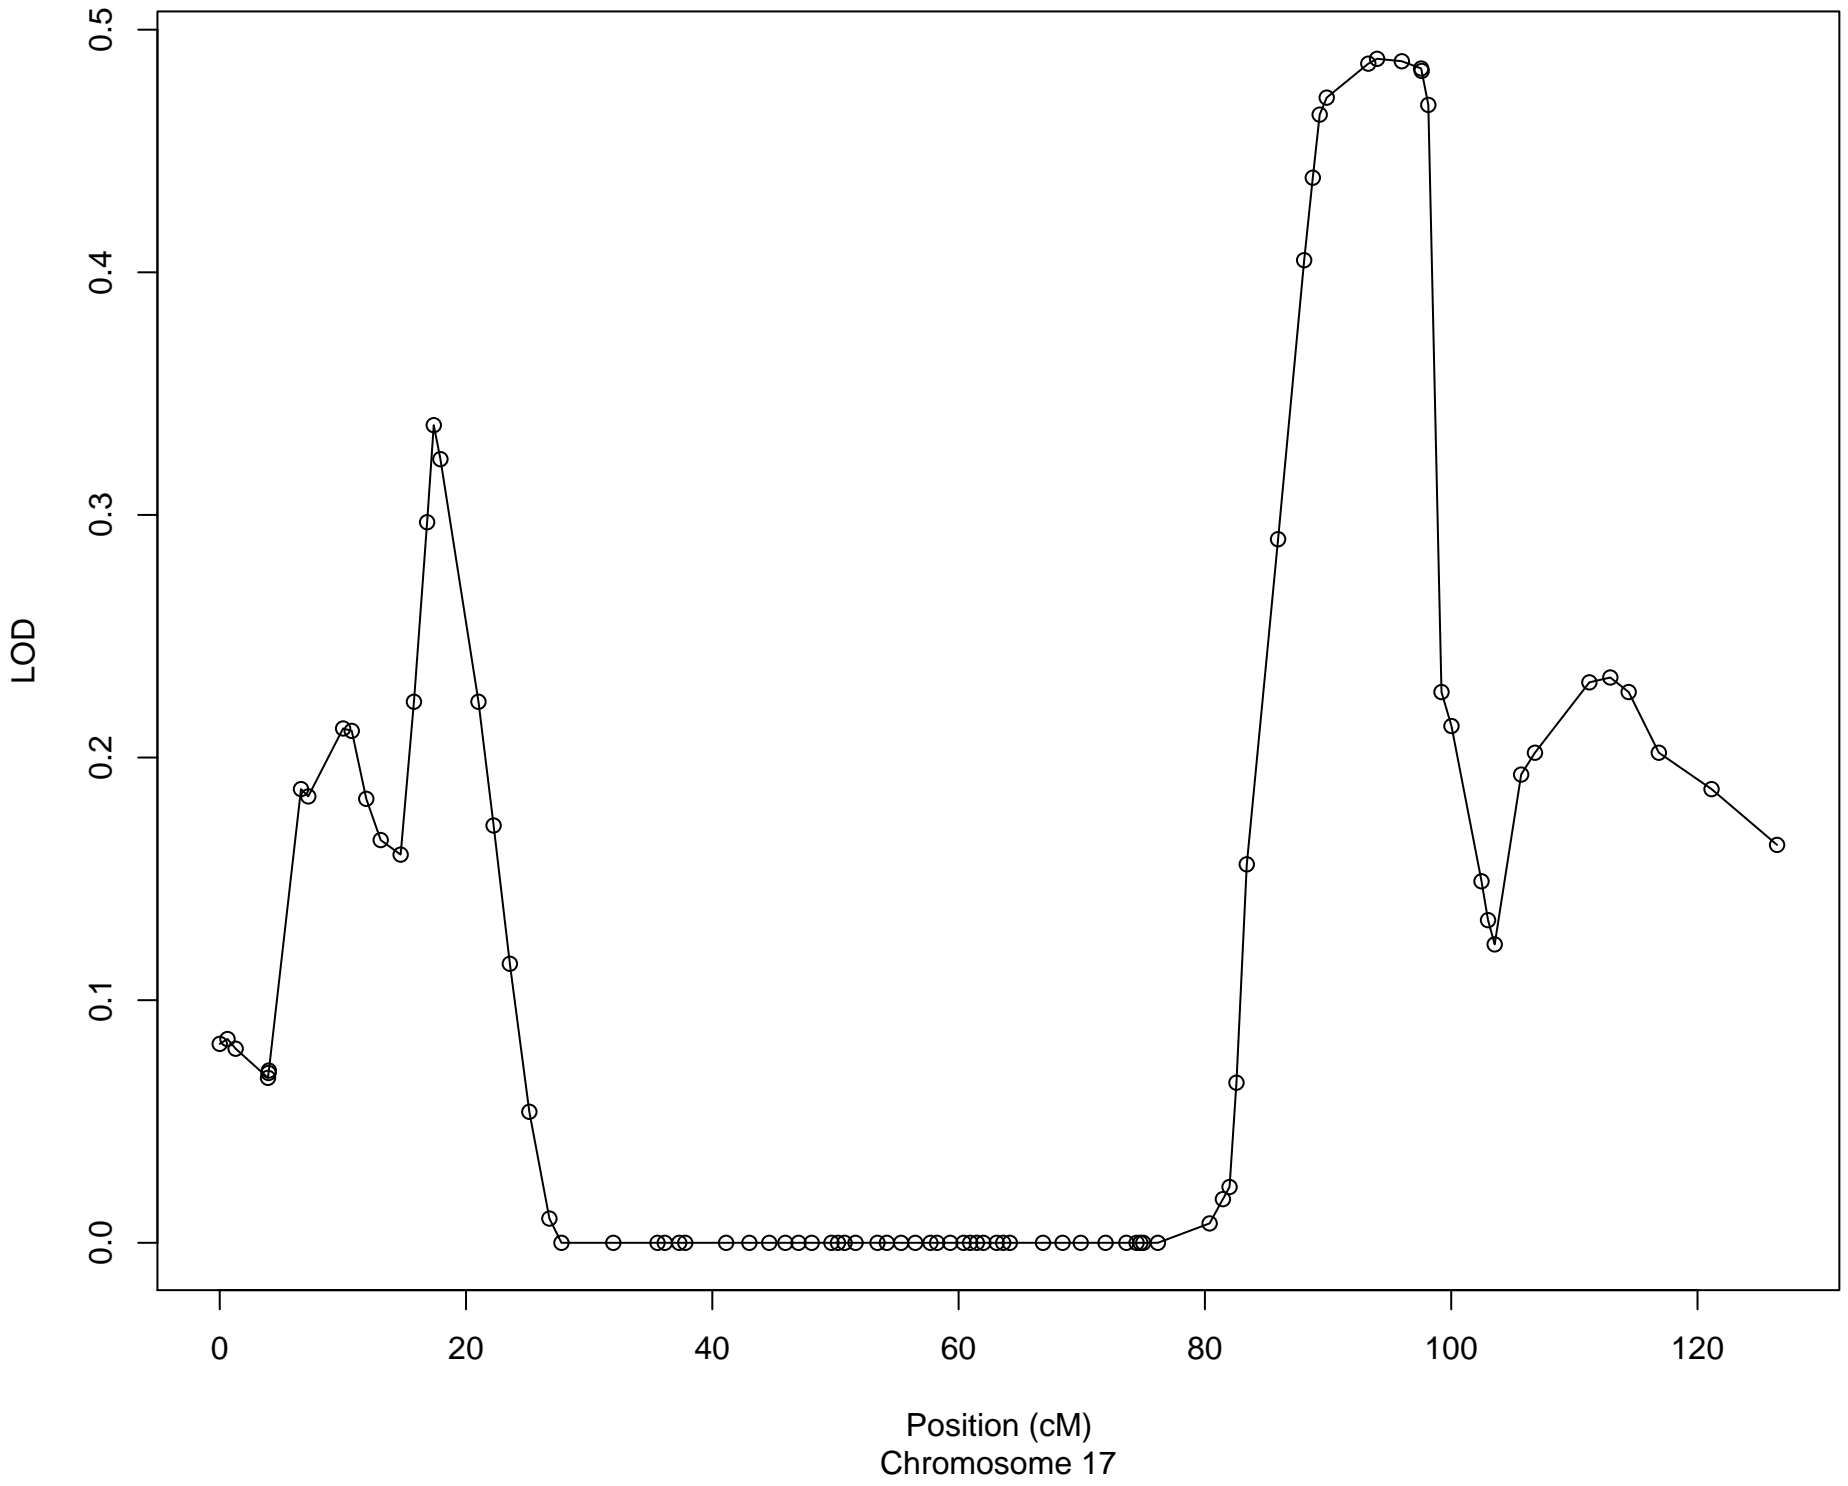

# IC50 (10-hydroxy-camptothecin) (IC50\_hCPT)

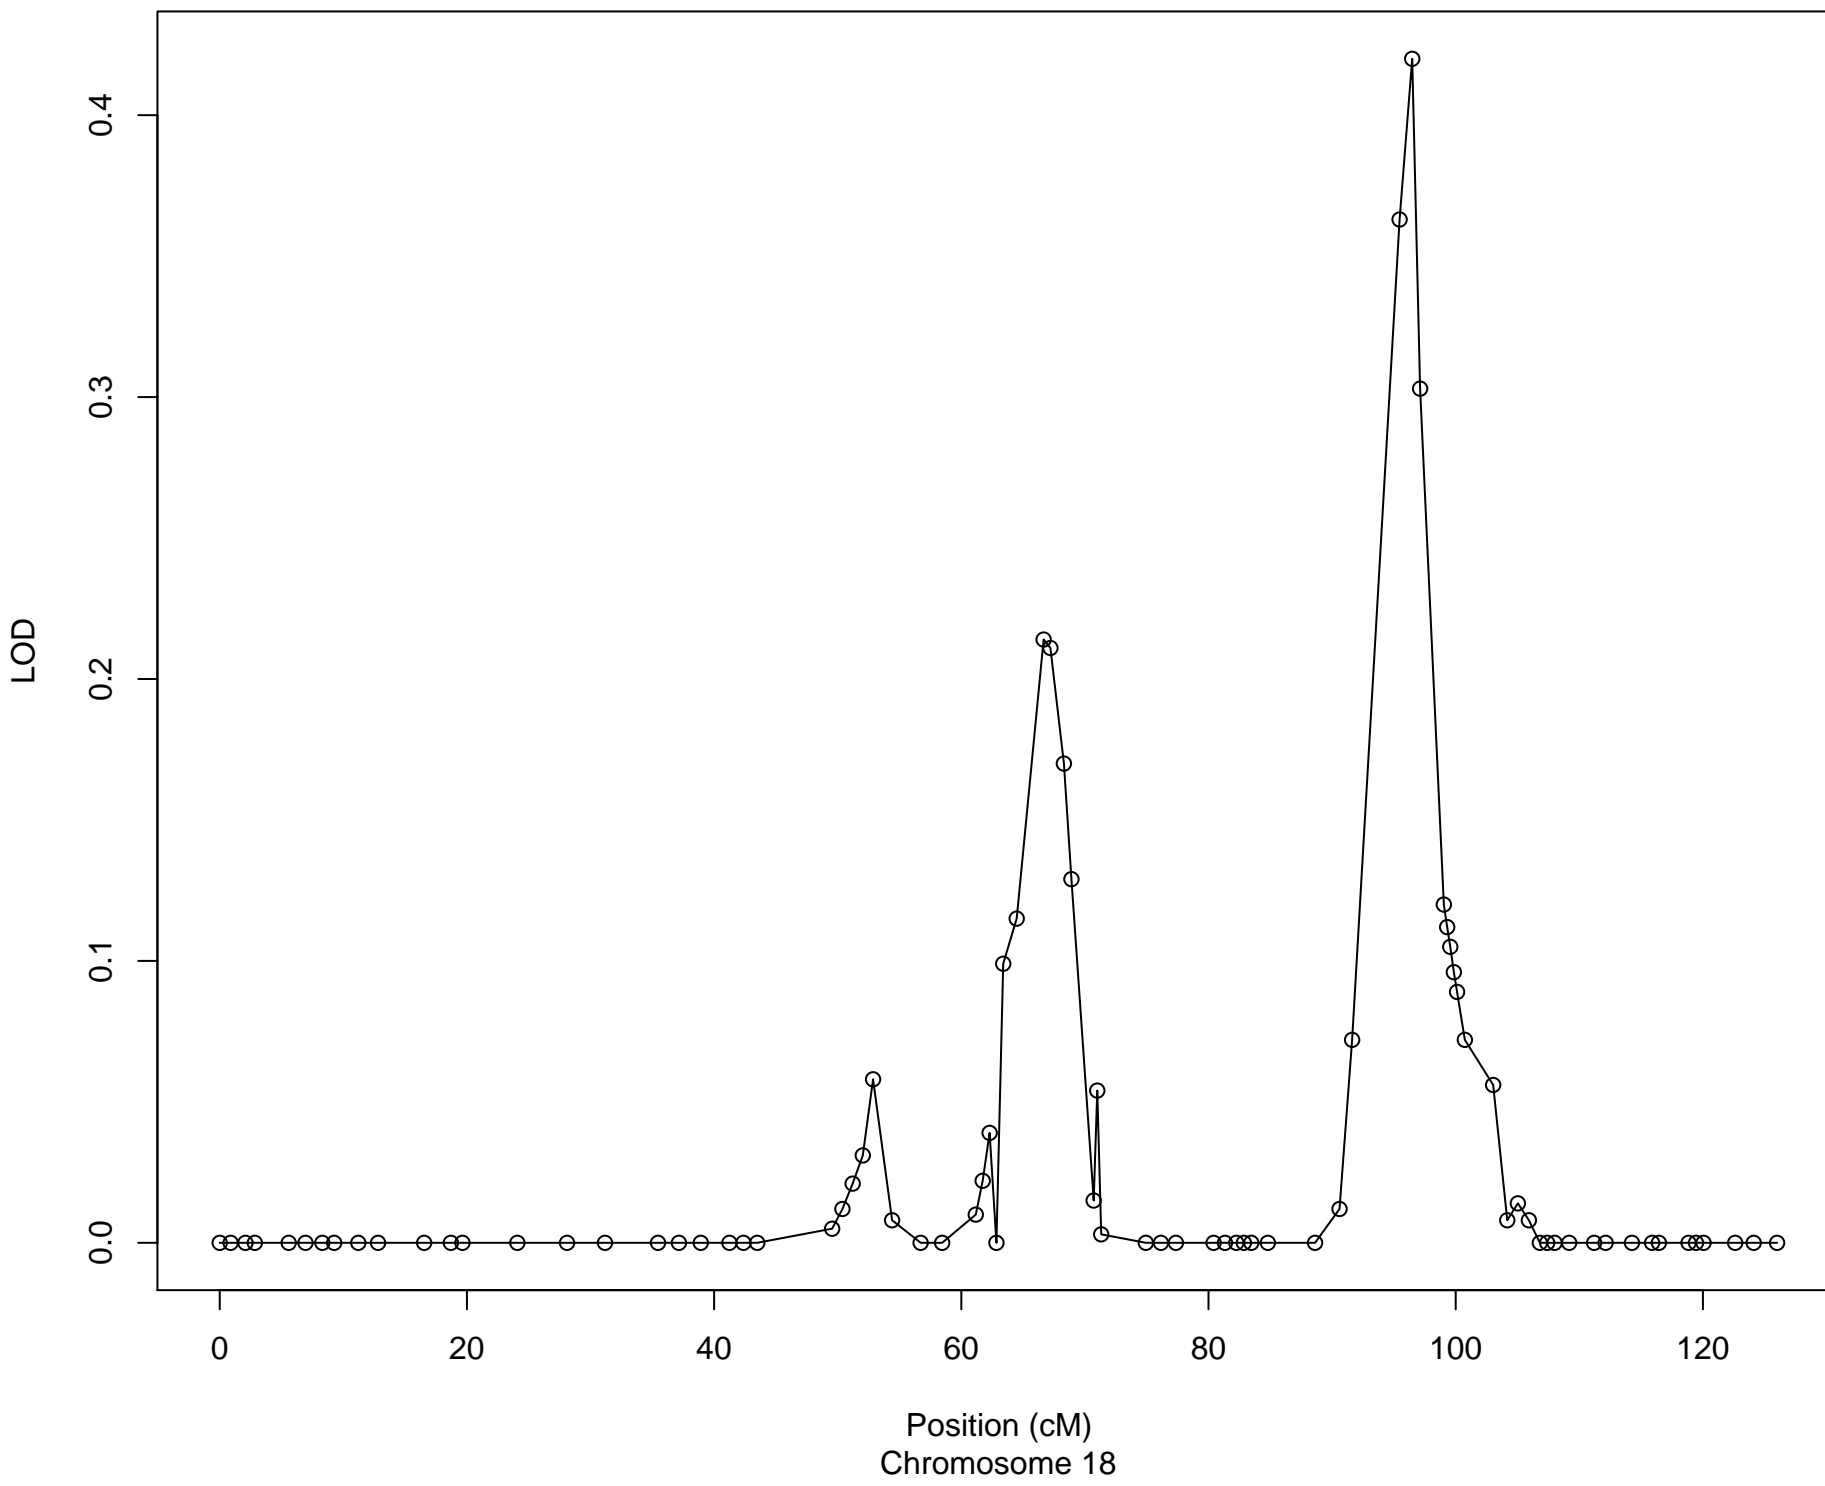

# IC50 (10-hydroxy-camptothecin) (IC50\_hCPT)

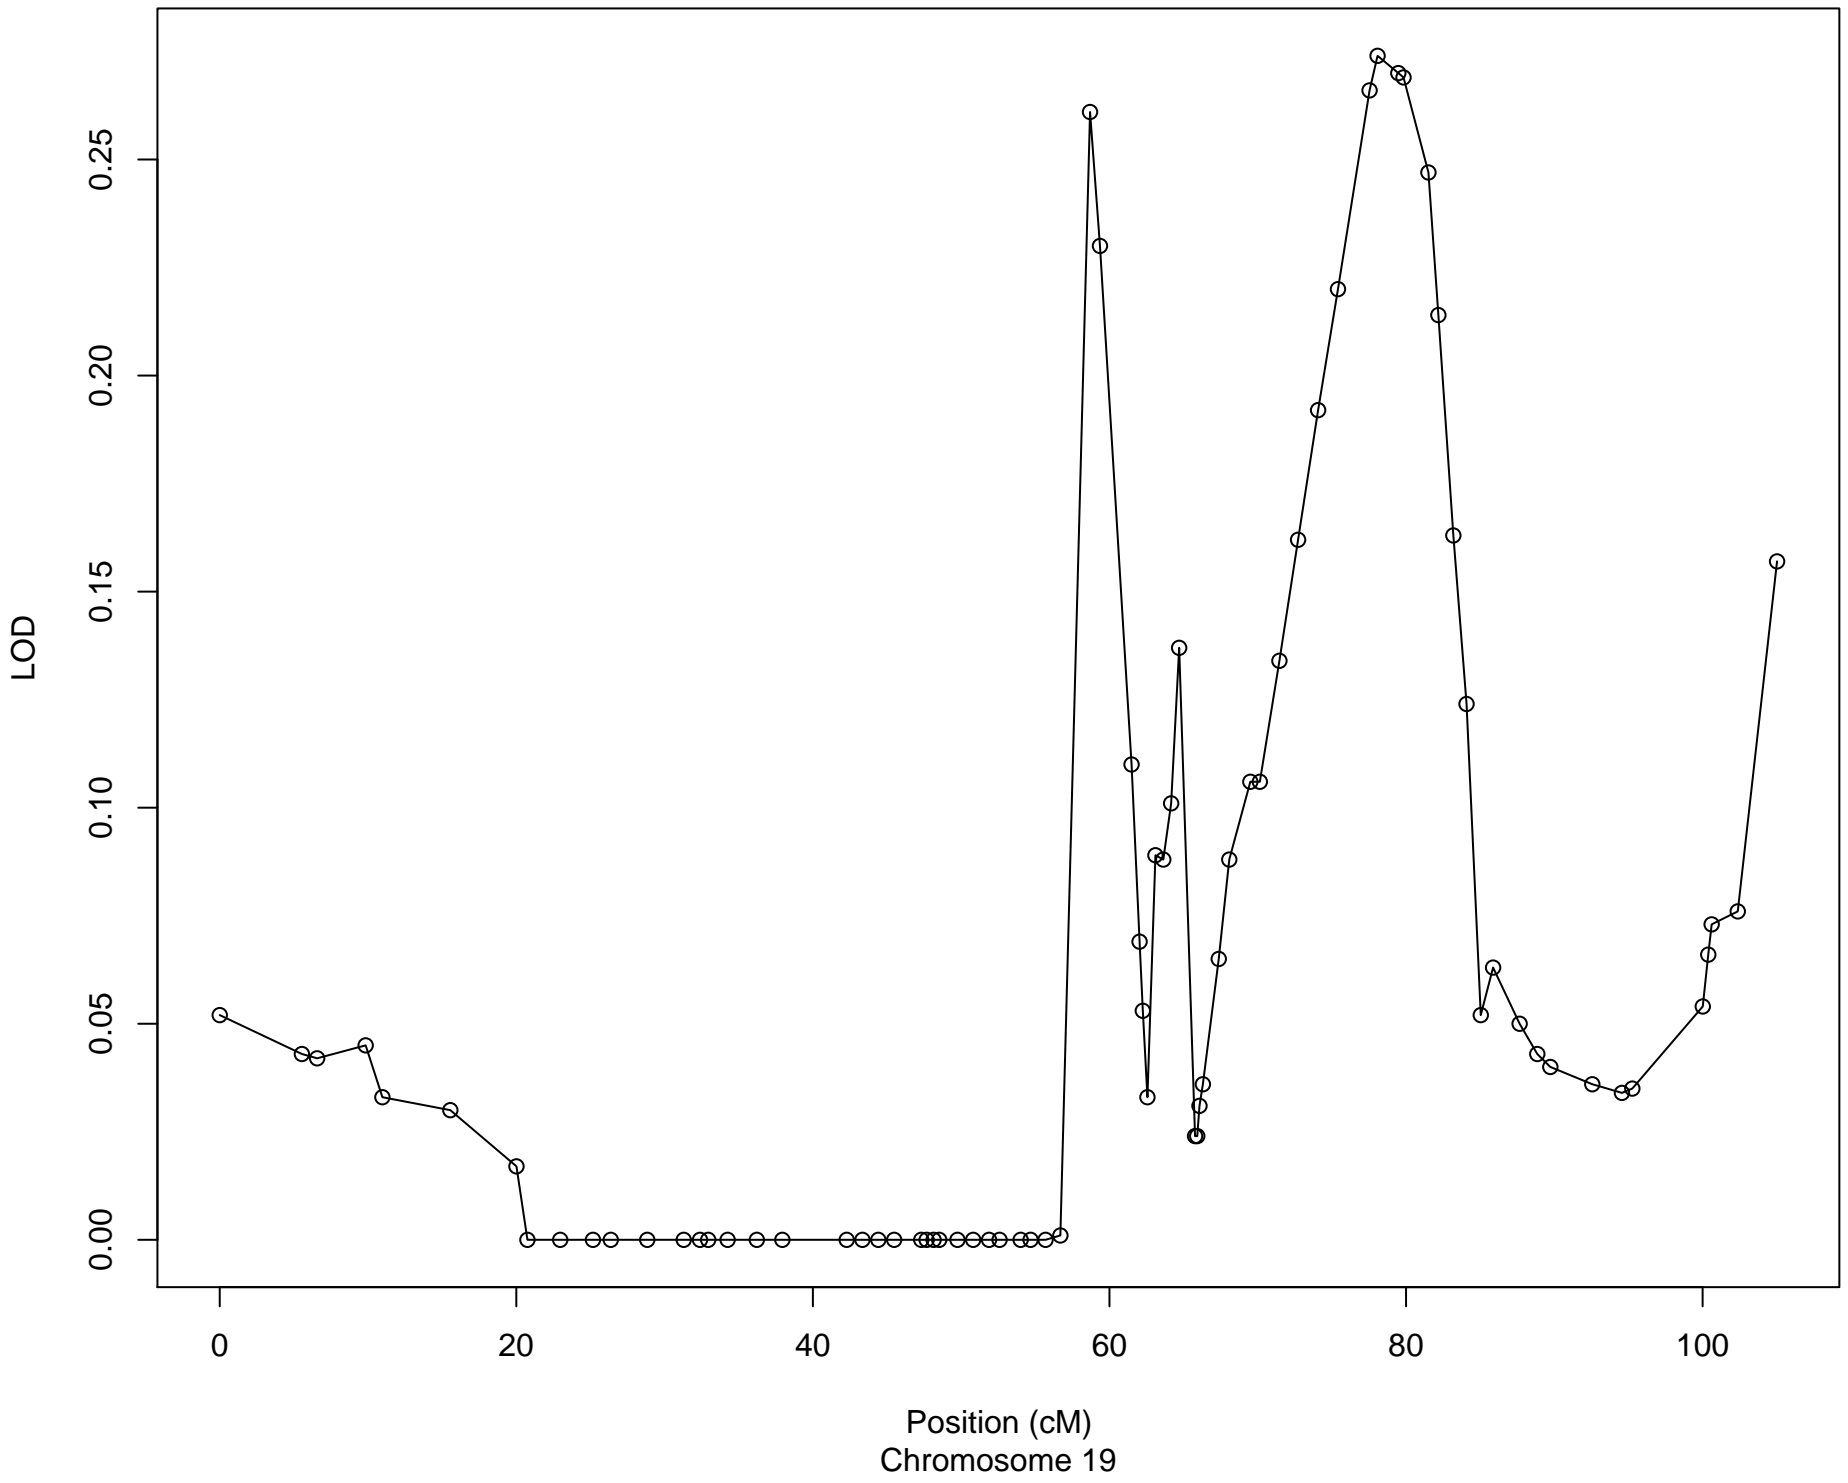

# IC50 (10-hydroxy-camptothecin) (IC50\_hCPT)

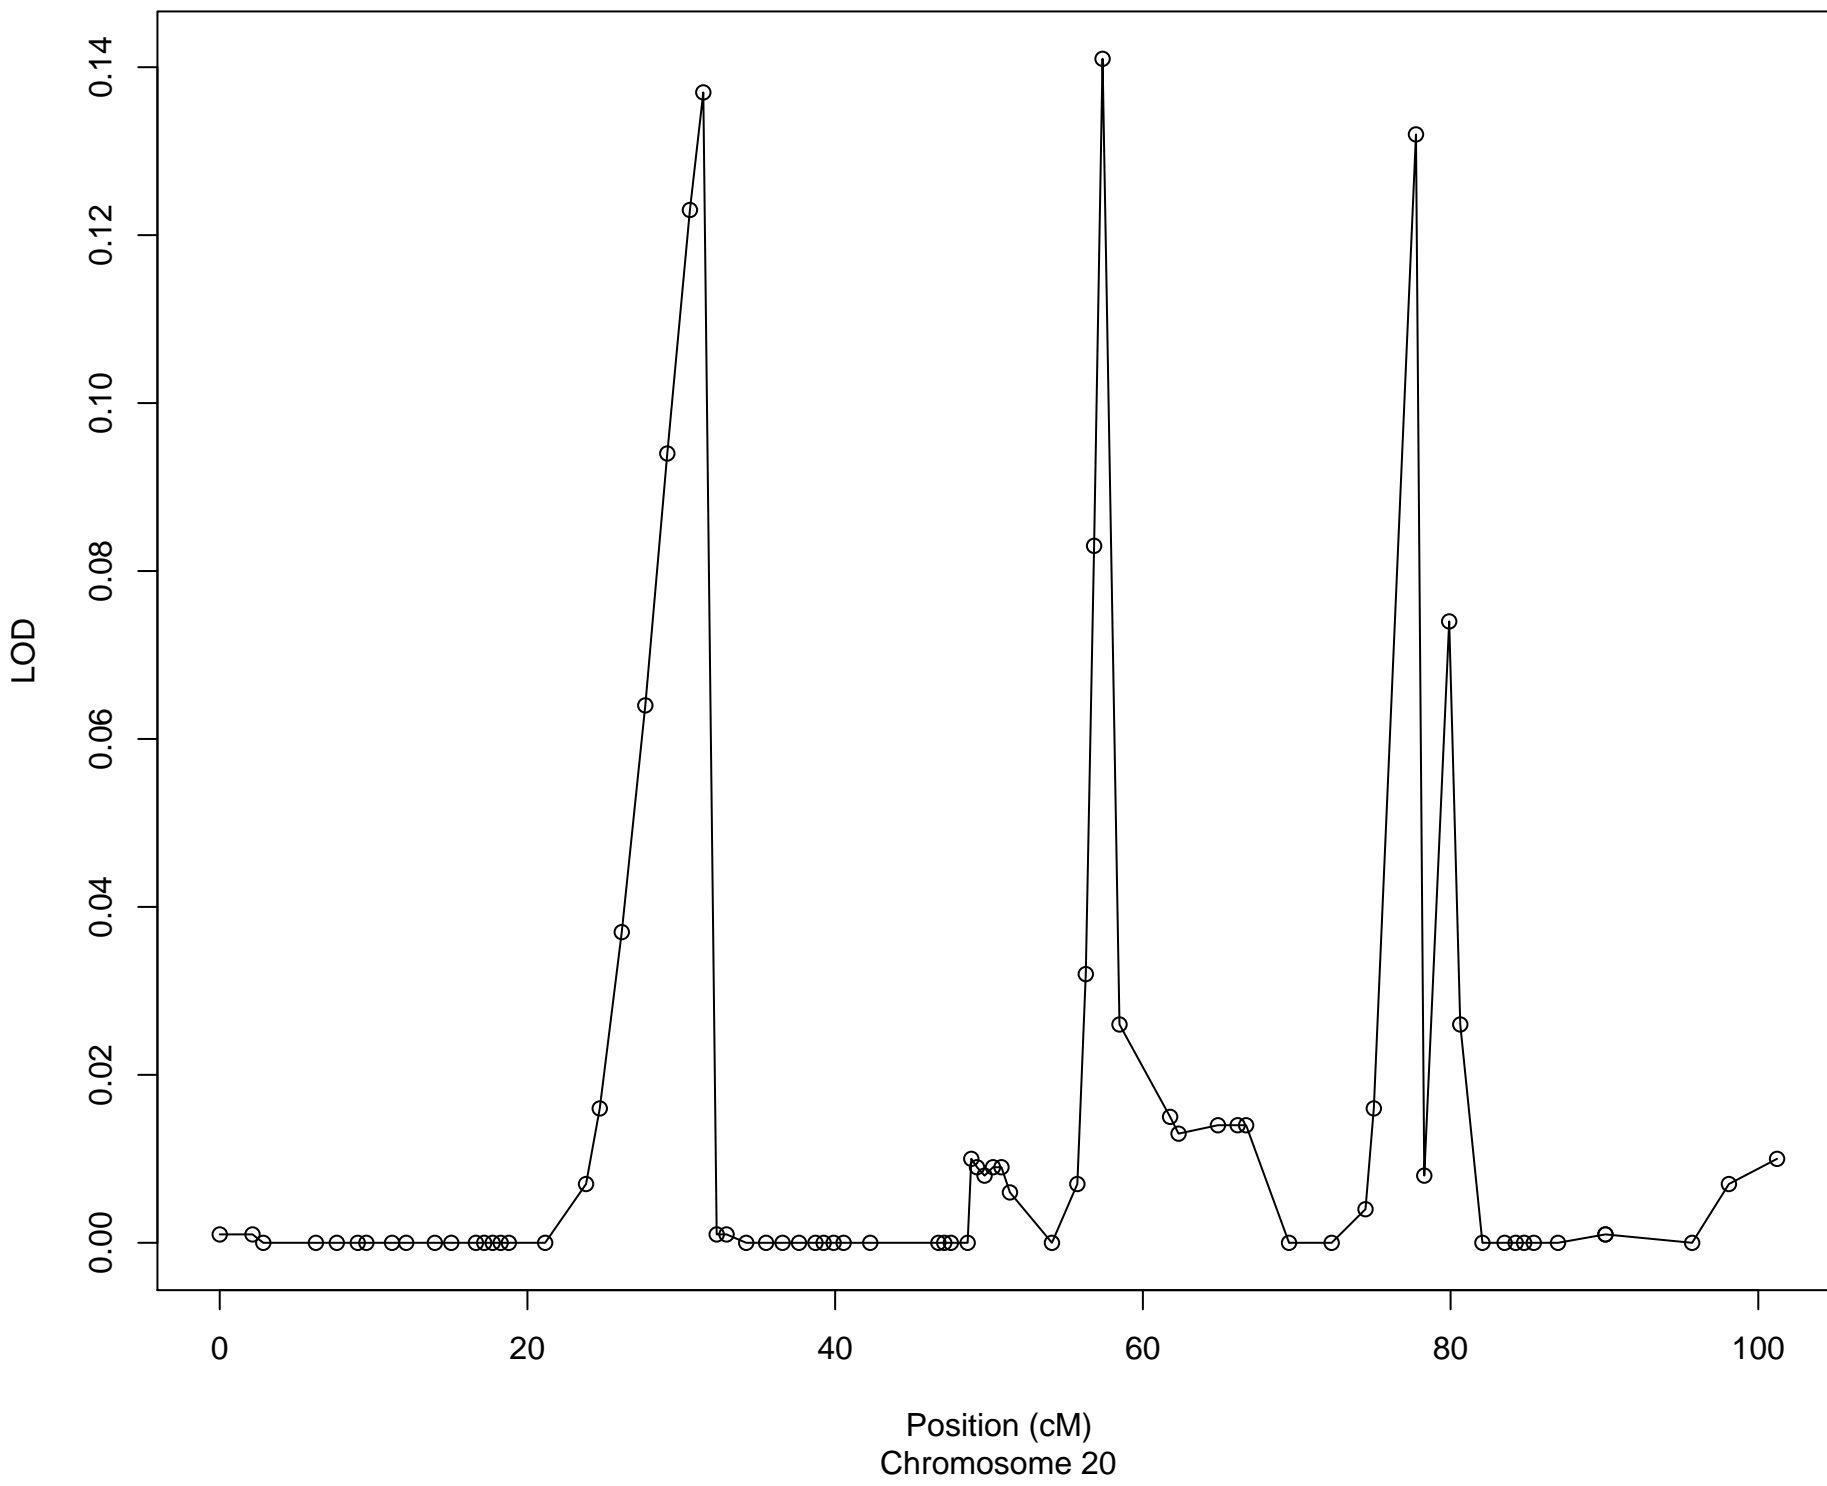

# IC50 (10-hydroxy-camptothecin) (IC50\_hCPT)

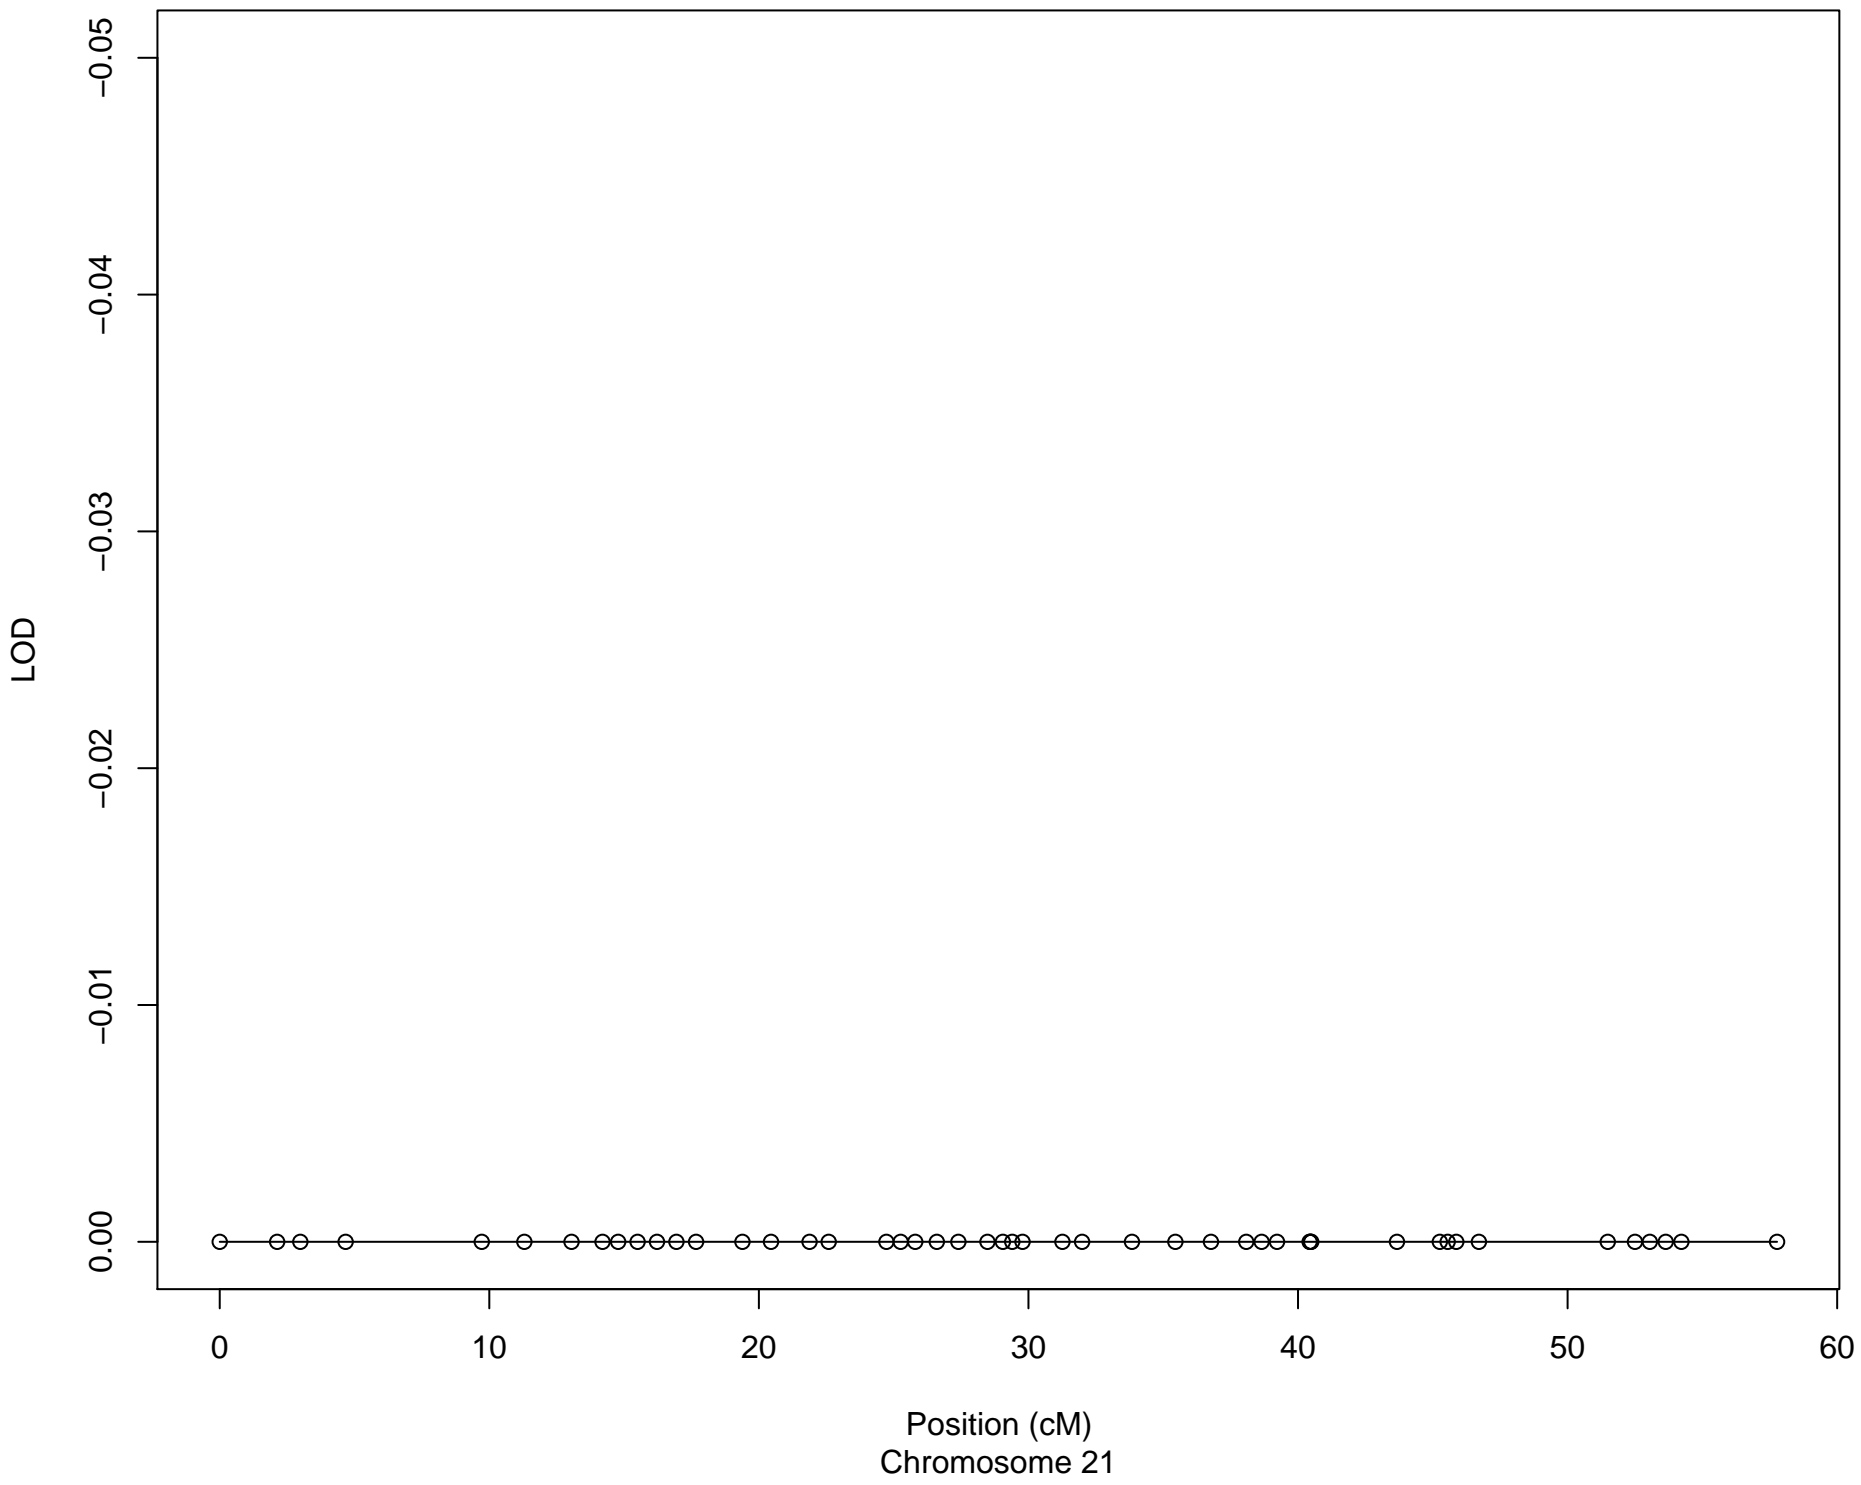

# IC50 (10-hydroxy-camptothecin) (IC50\_hCPT)

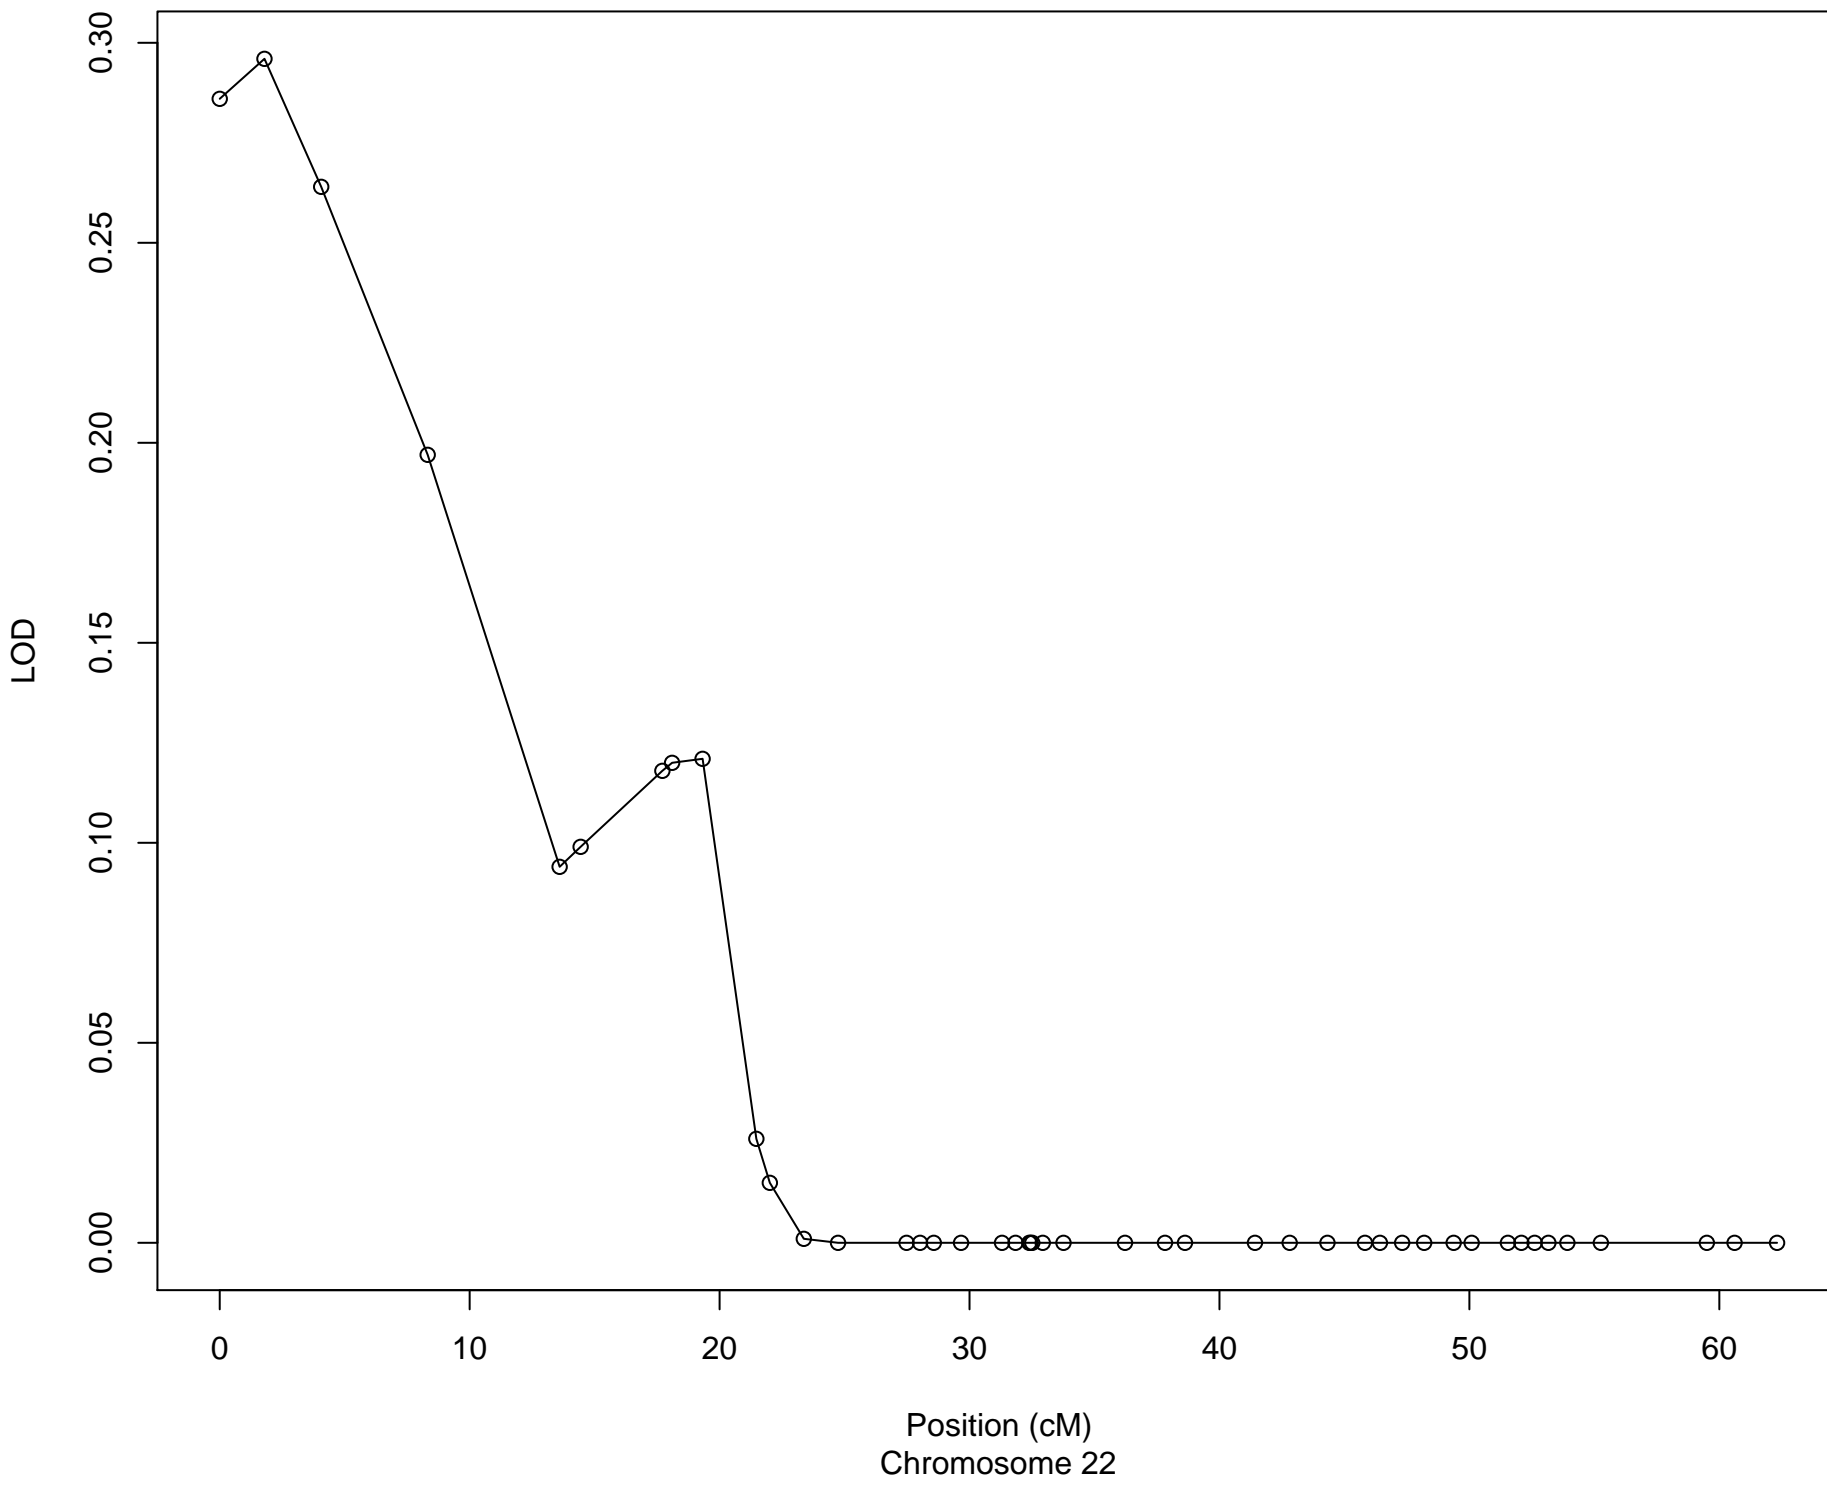



# IC50 (10-methoxy-camptothecin) (IC50\_mCPT)

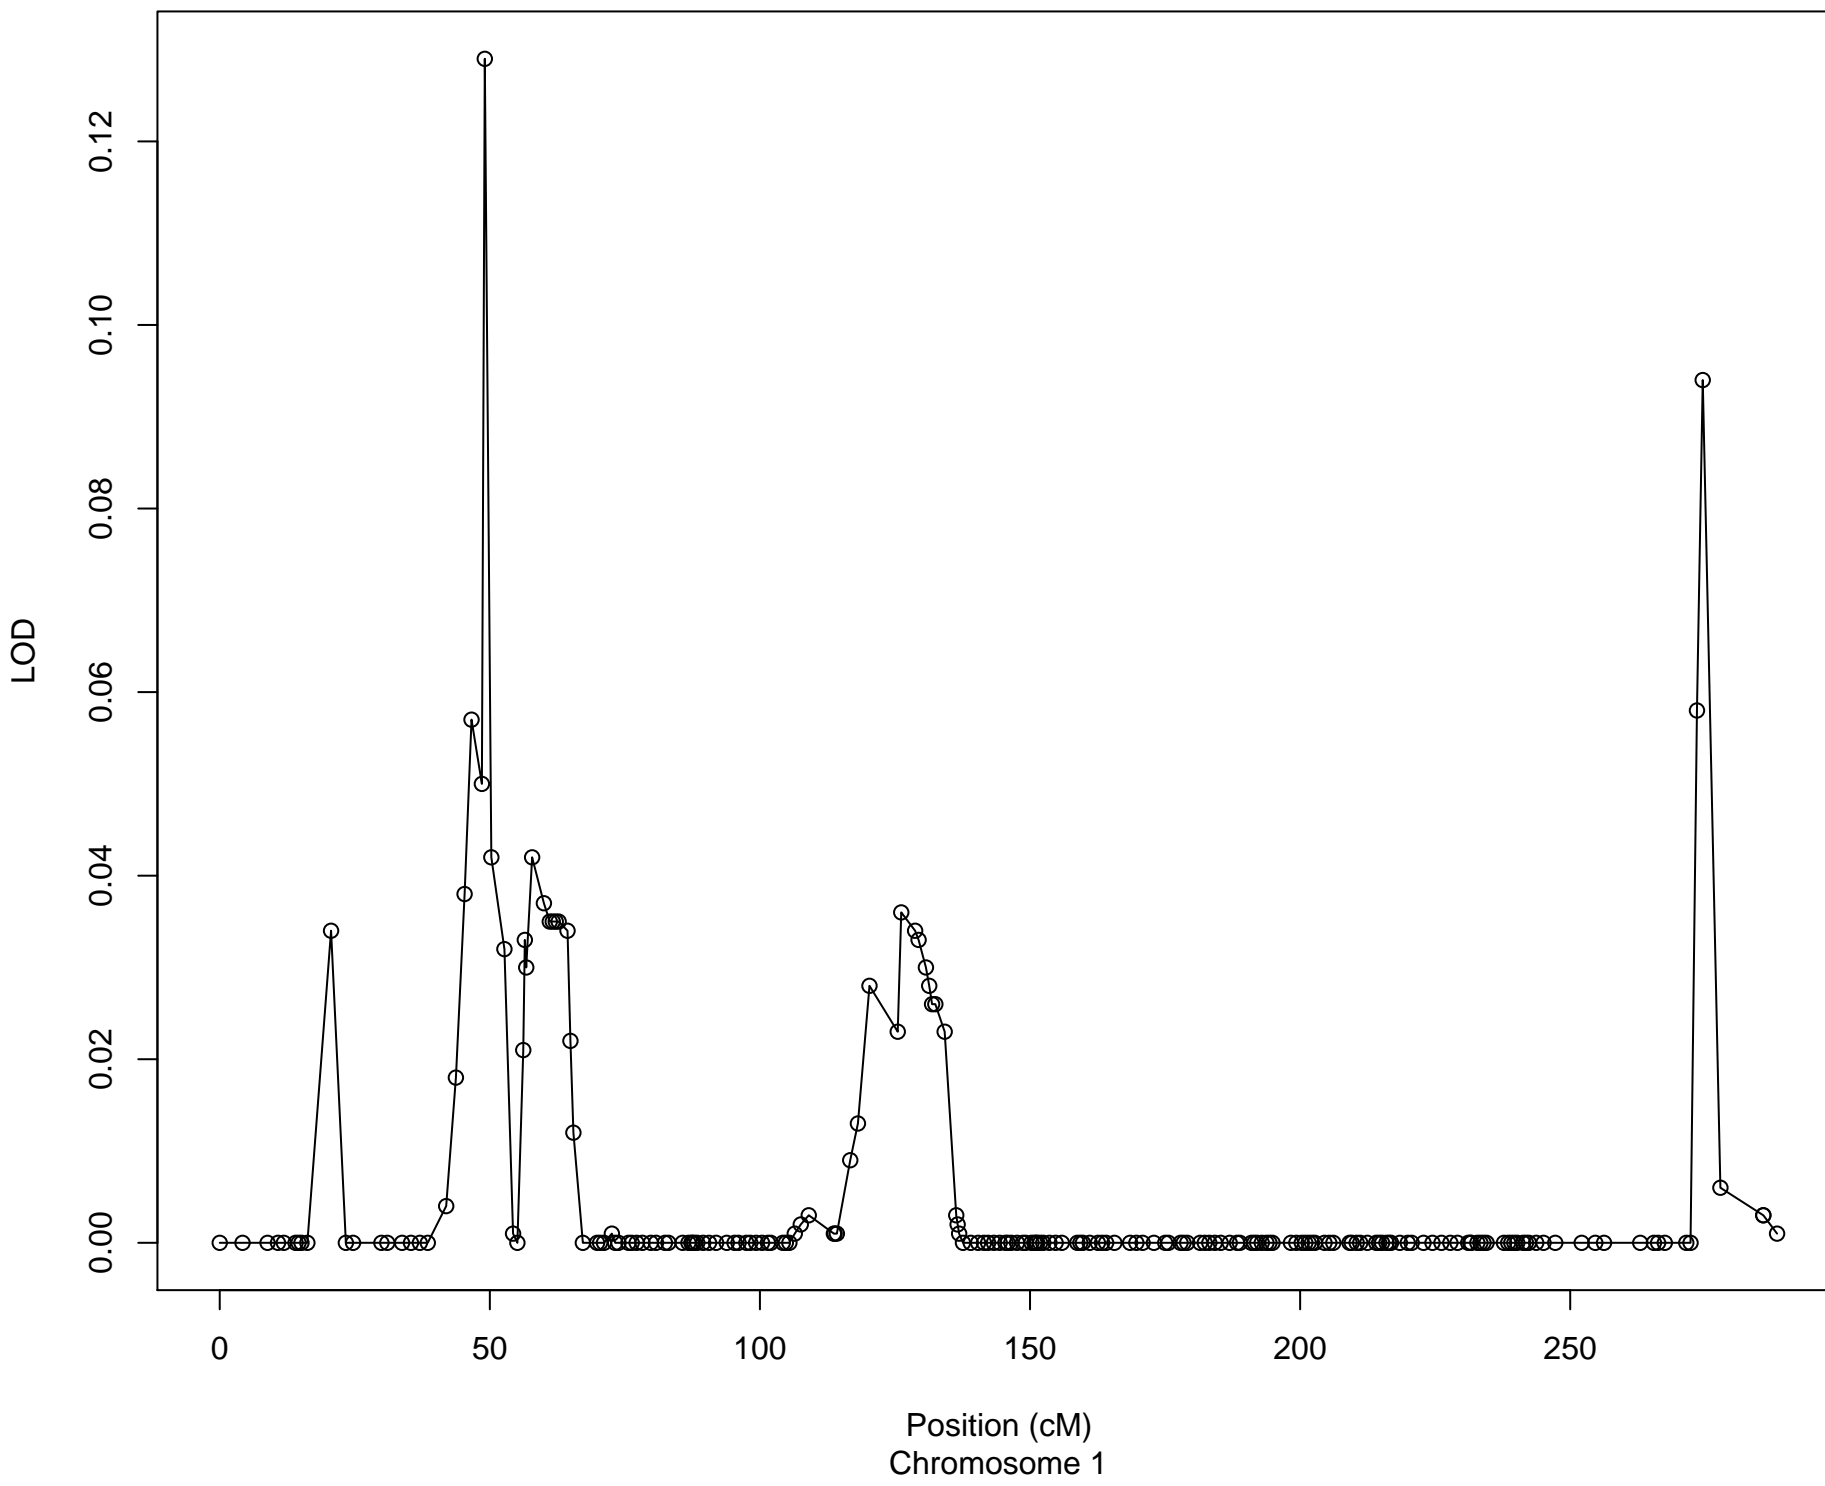

# IC50 (10-methoxy-camptothecin) (IC50\_mCPT)

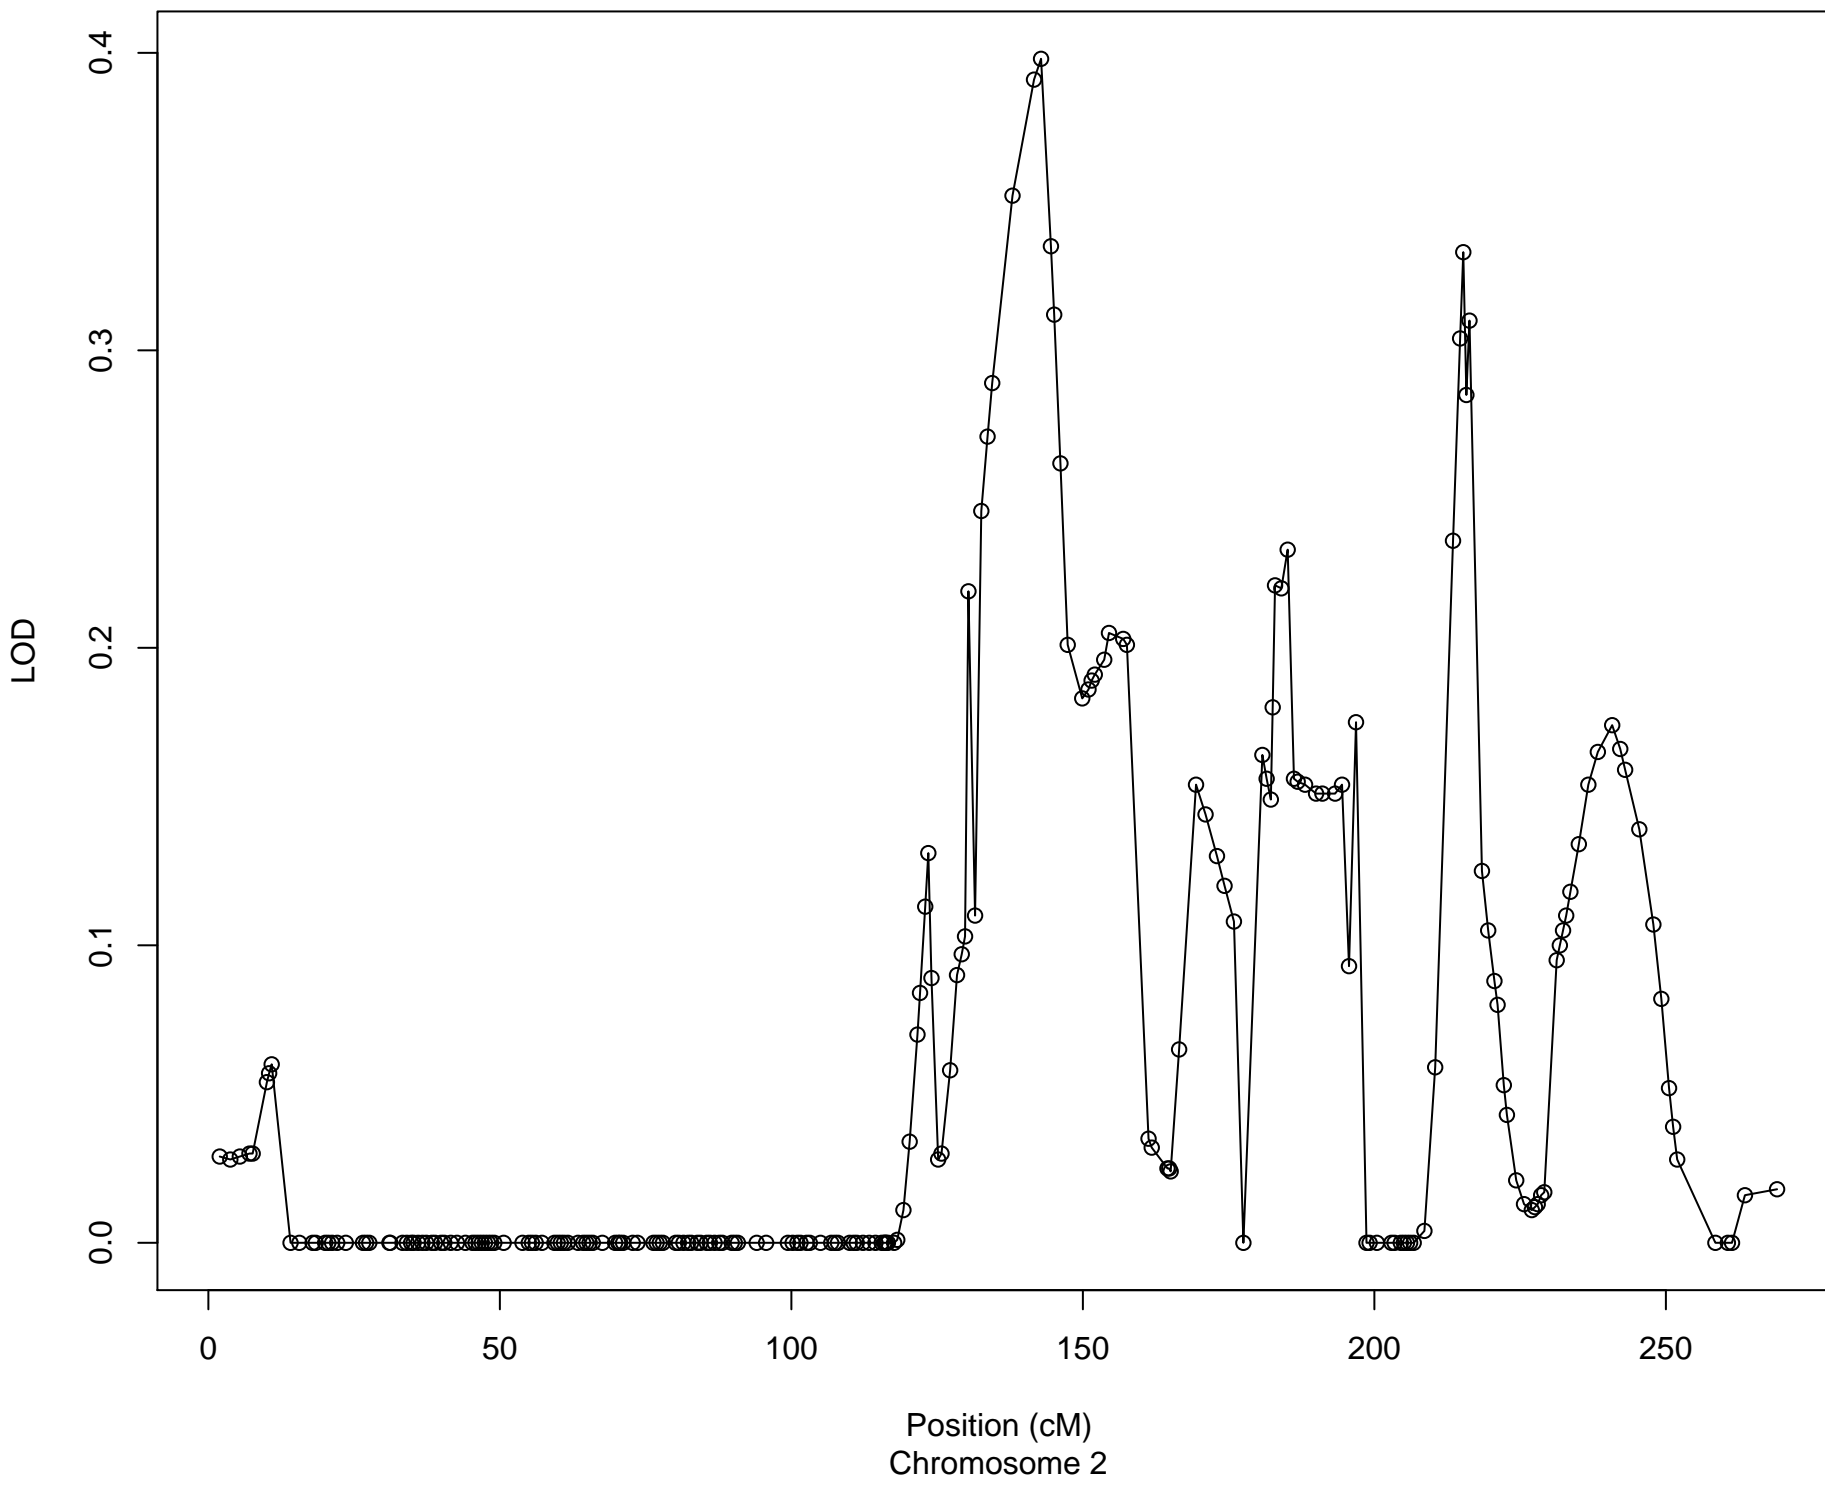

# IC50 (10-methoxy-camptothecin) (IC50\_mCPT)

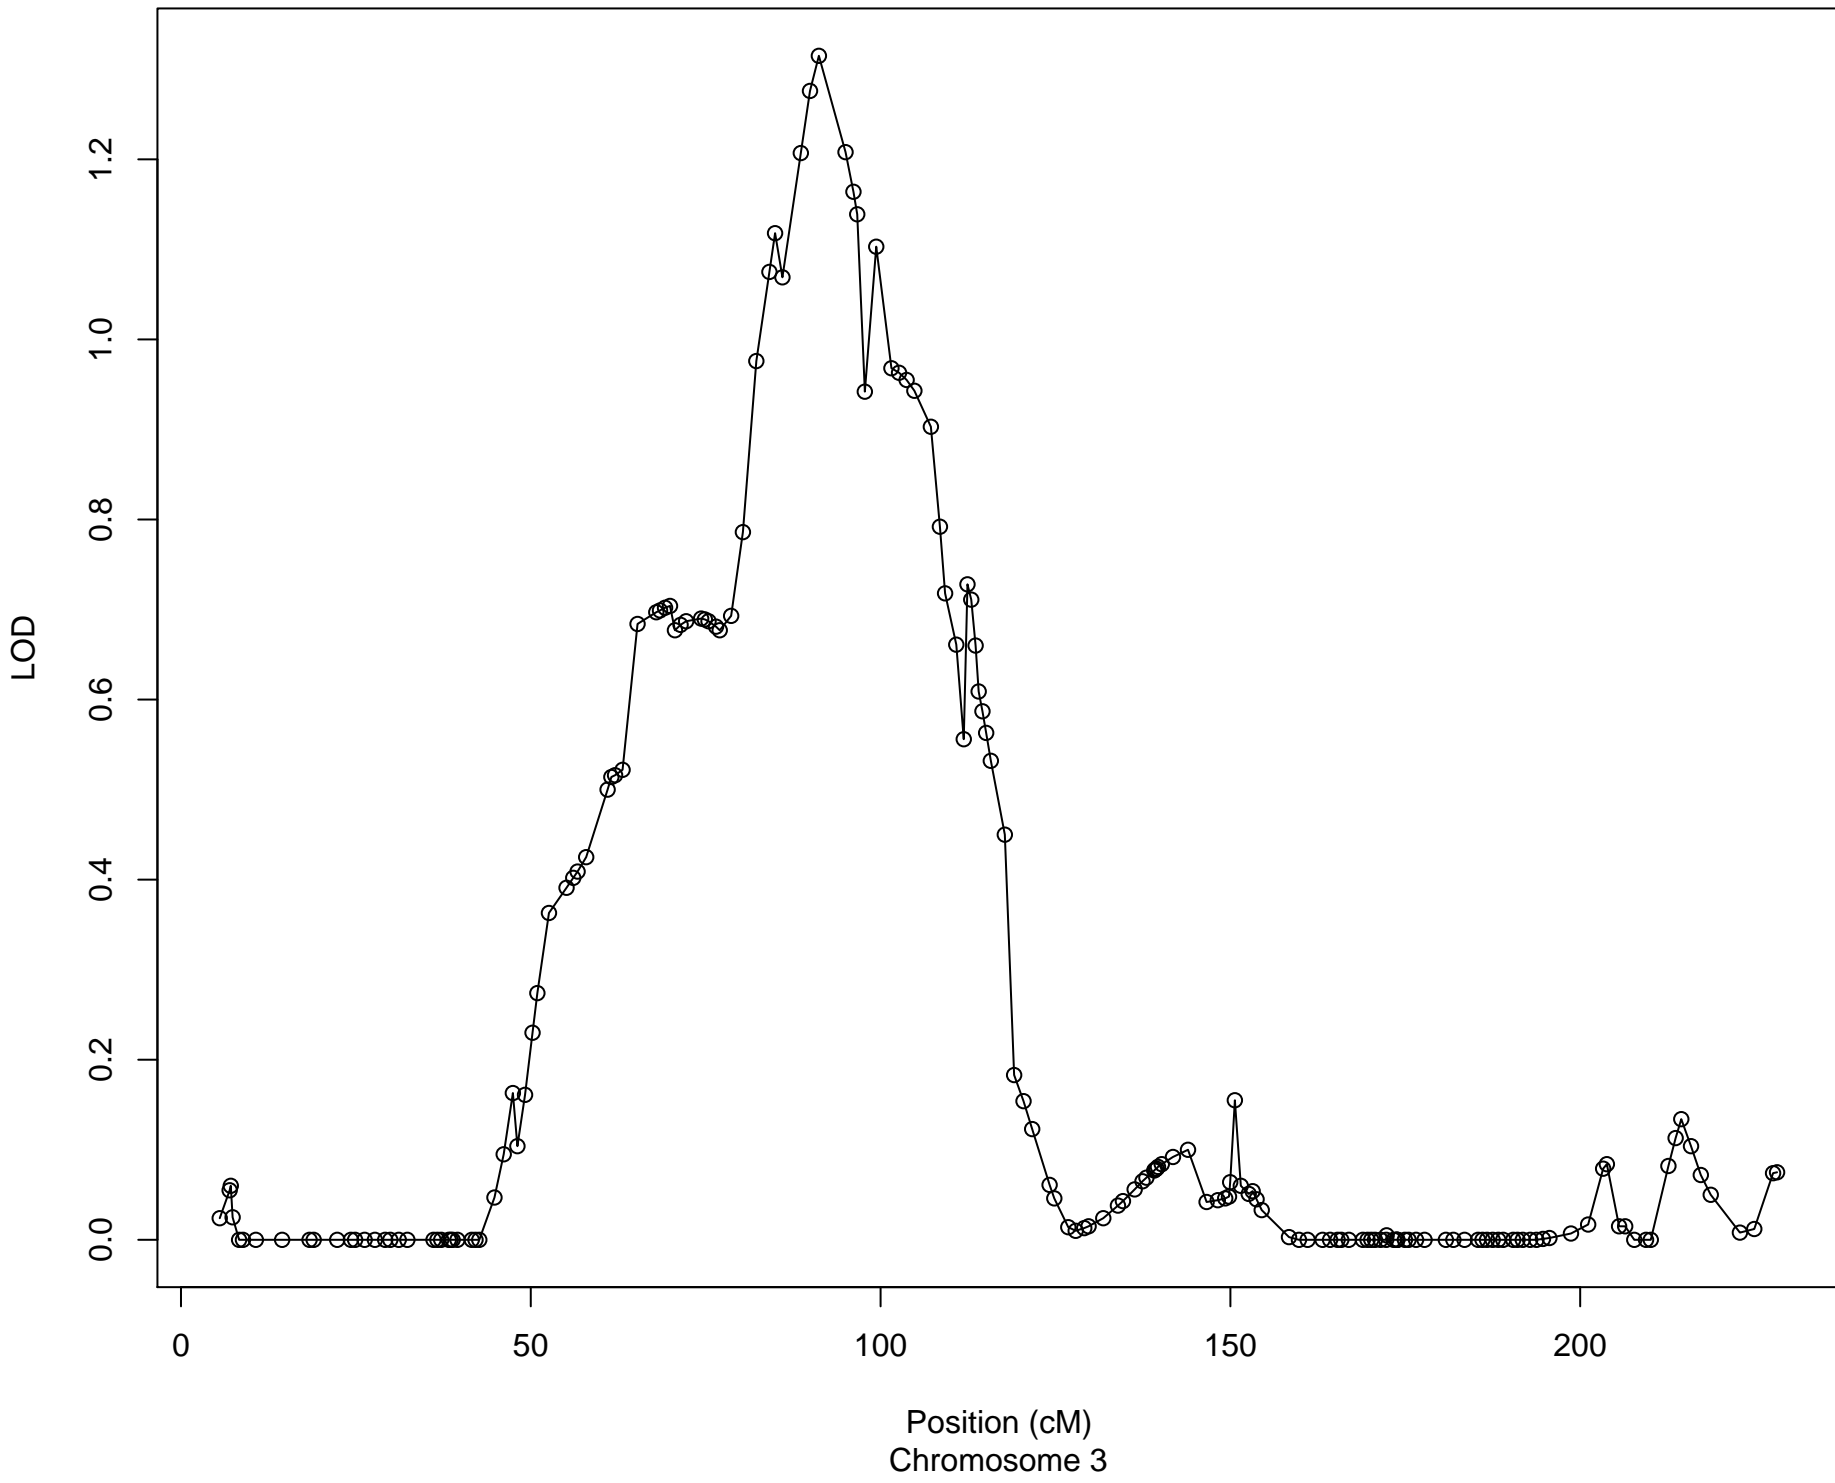

# IC50 (10-methoxy-camptothecin) (IC50\_mCPT)

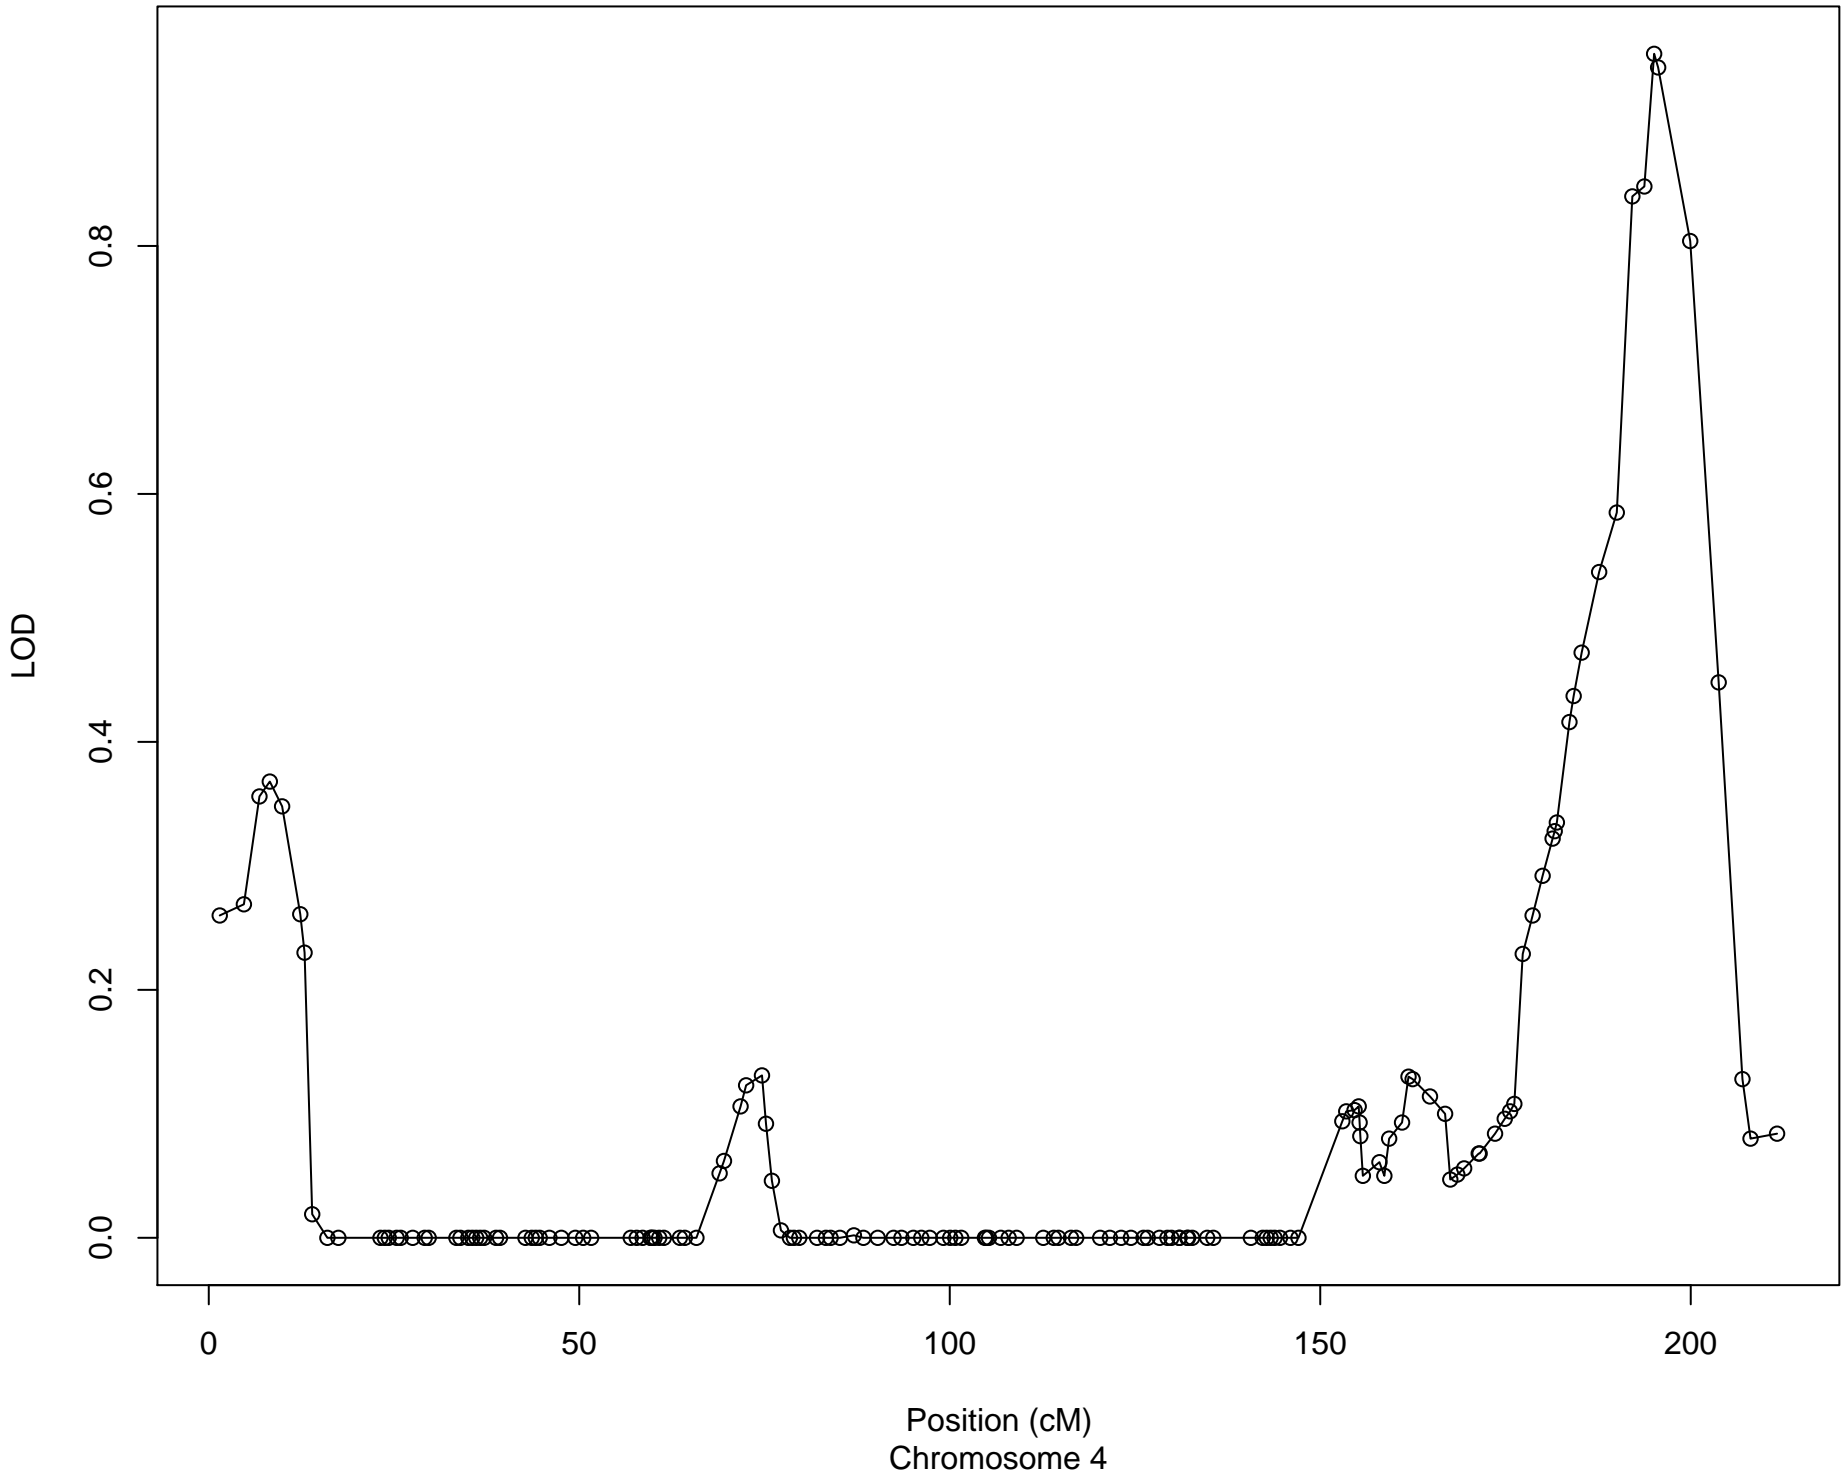

# IC50 (10-methoxy-camptothecin) (IC50\_mCPT)

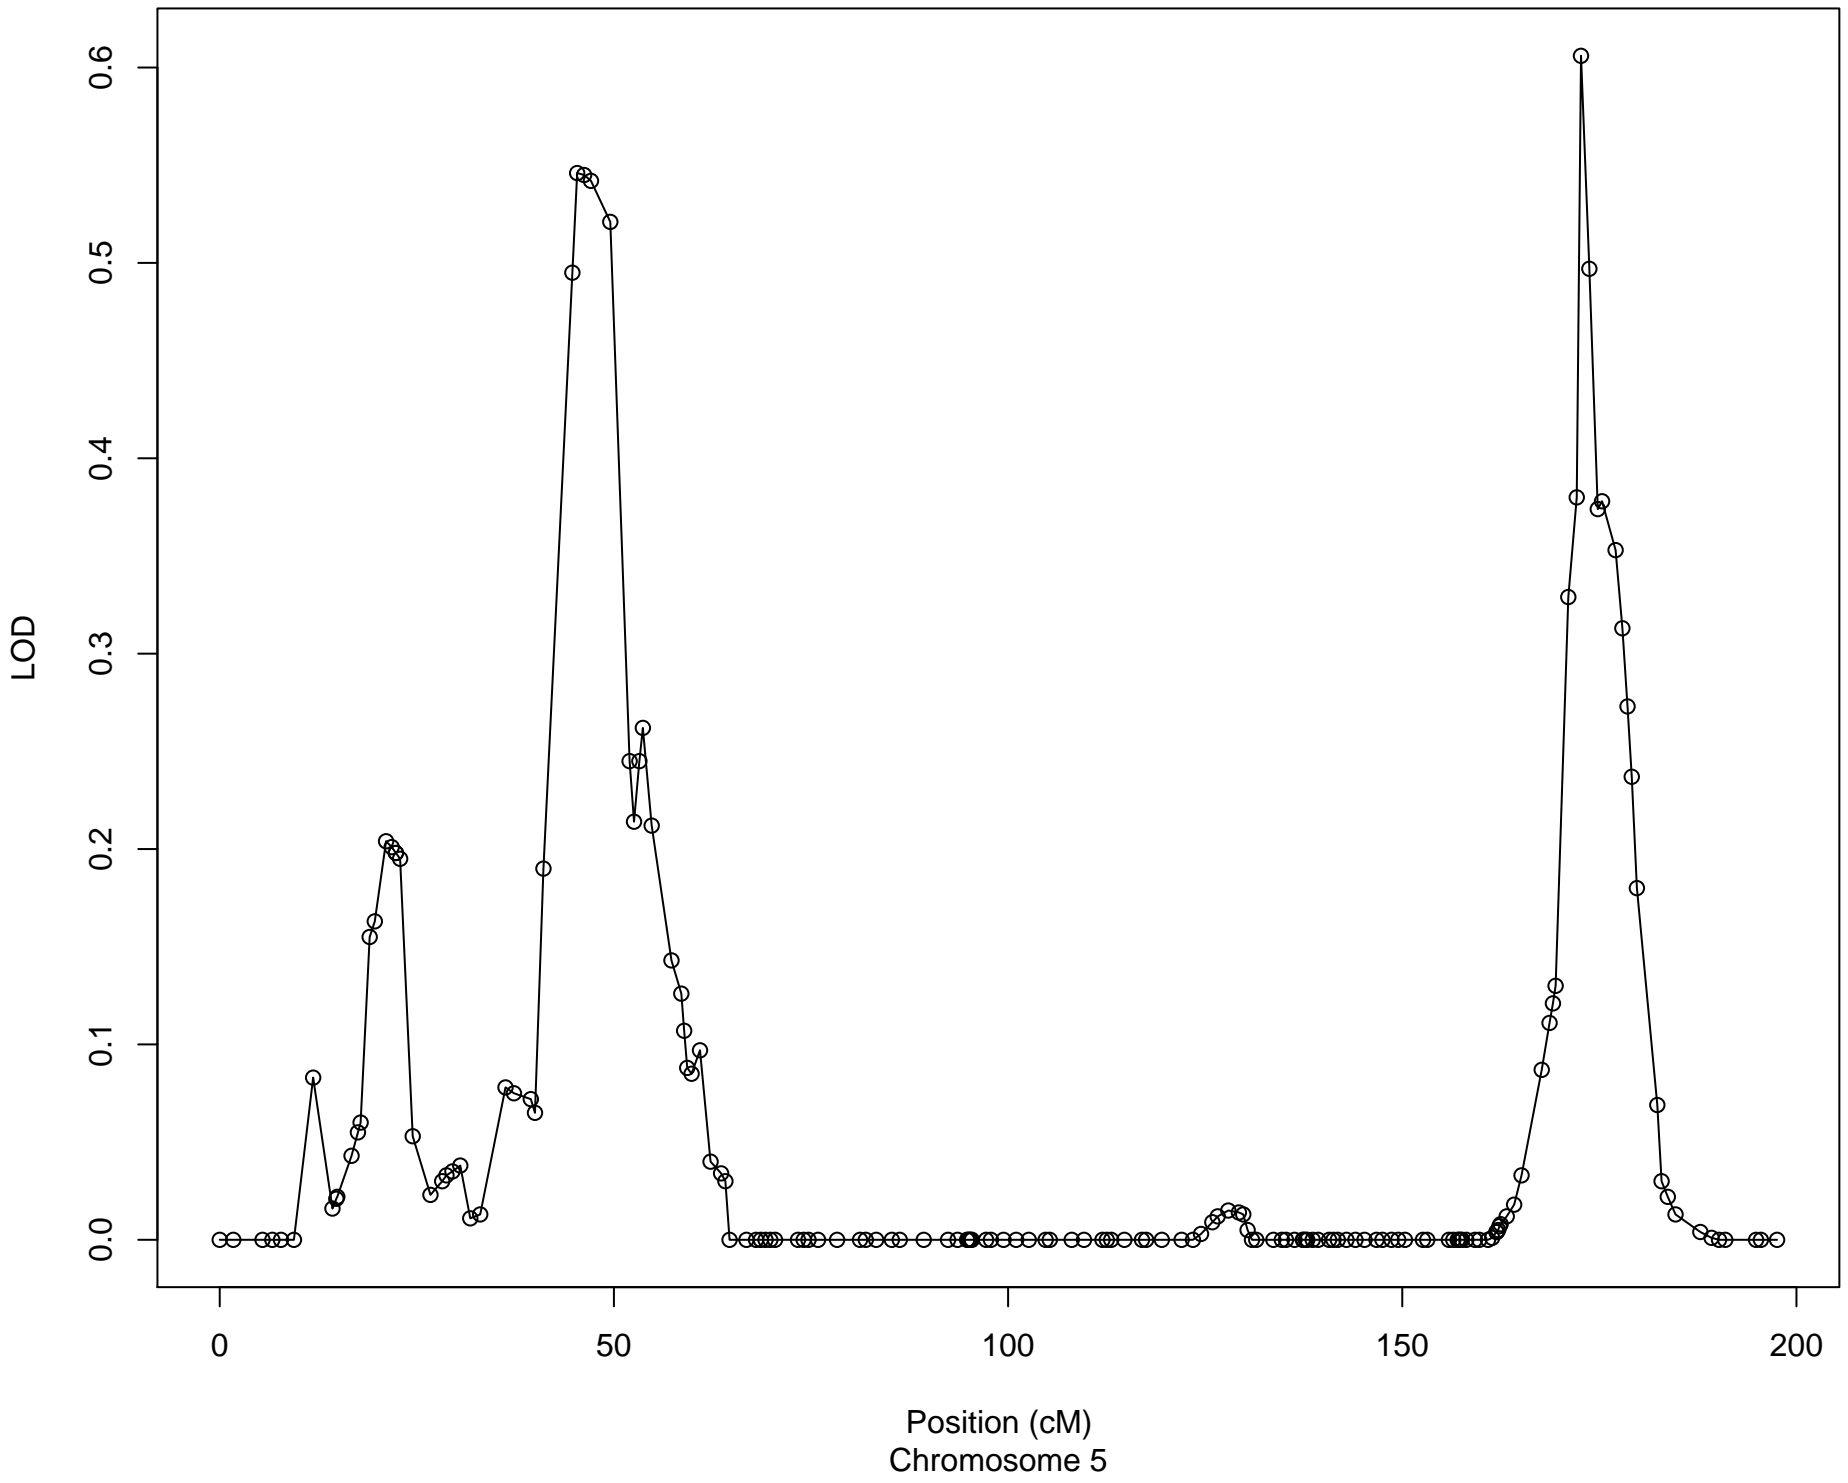

# IC50 (10-methoxy-camptothecin) (IC50\_mCPT)

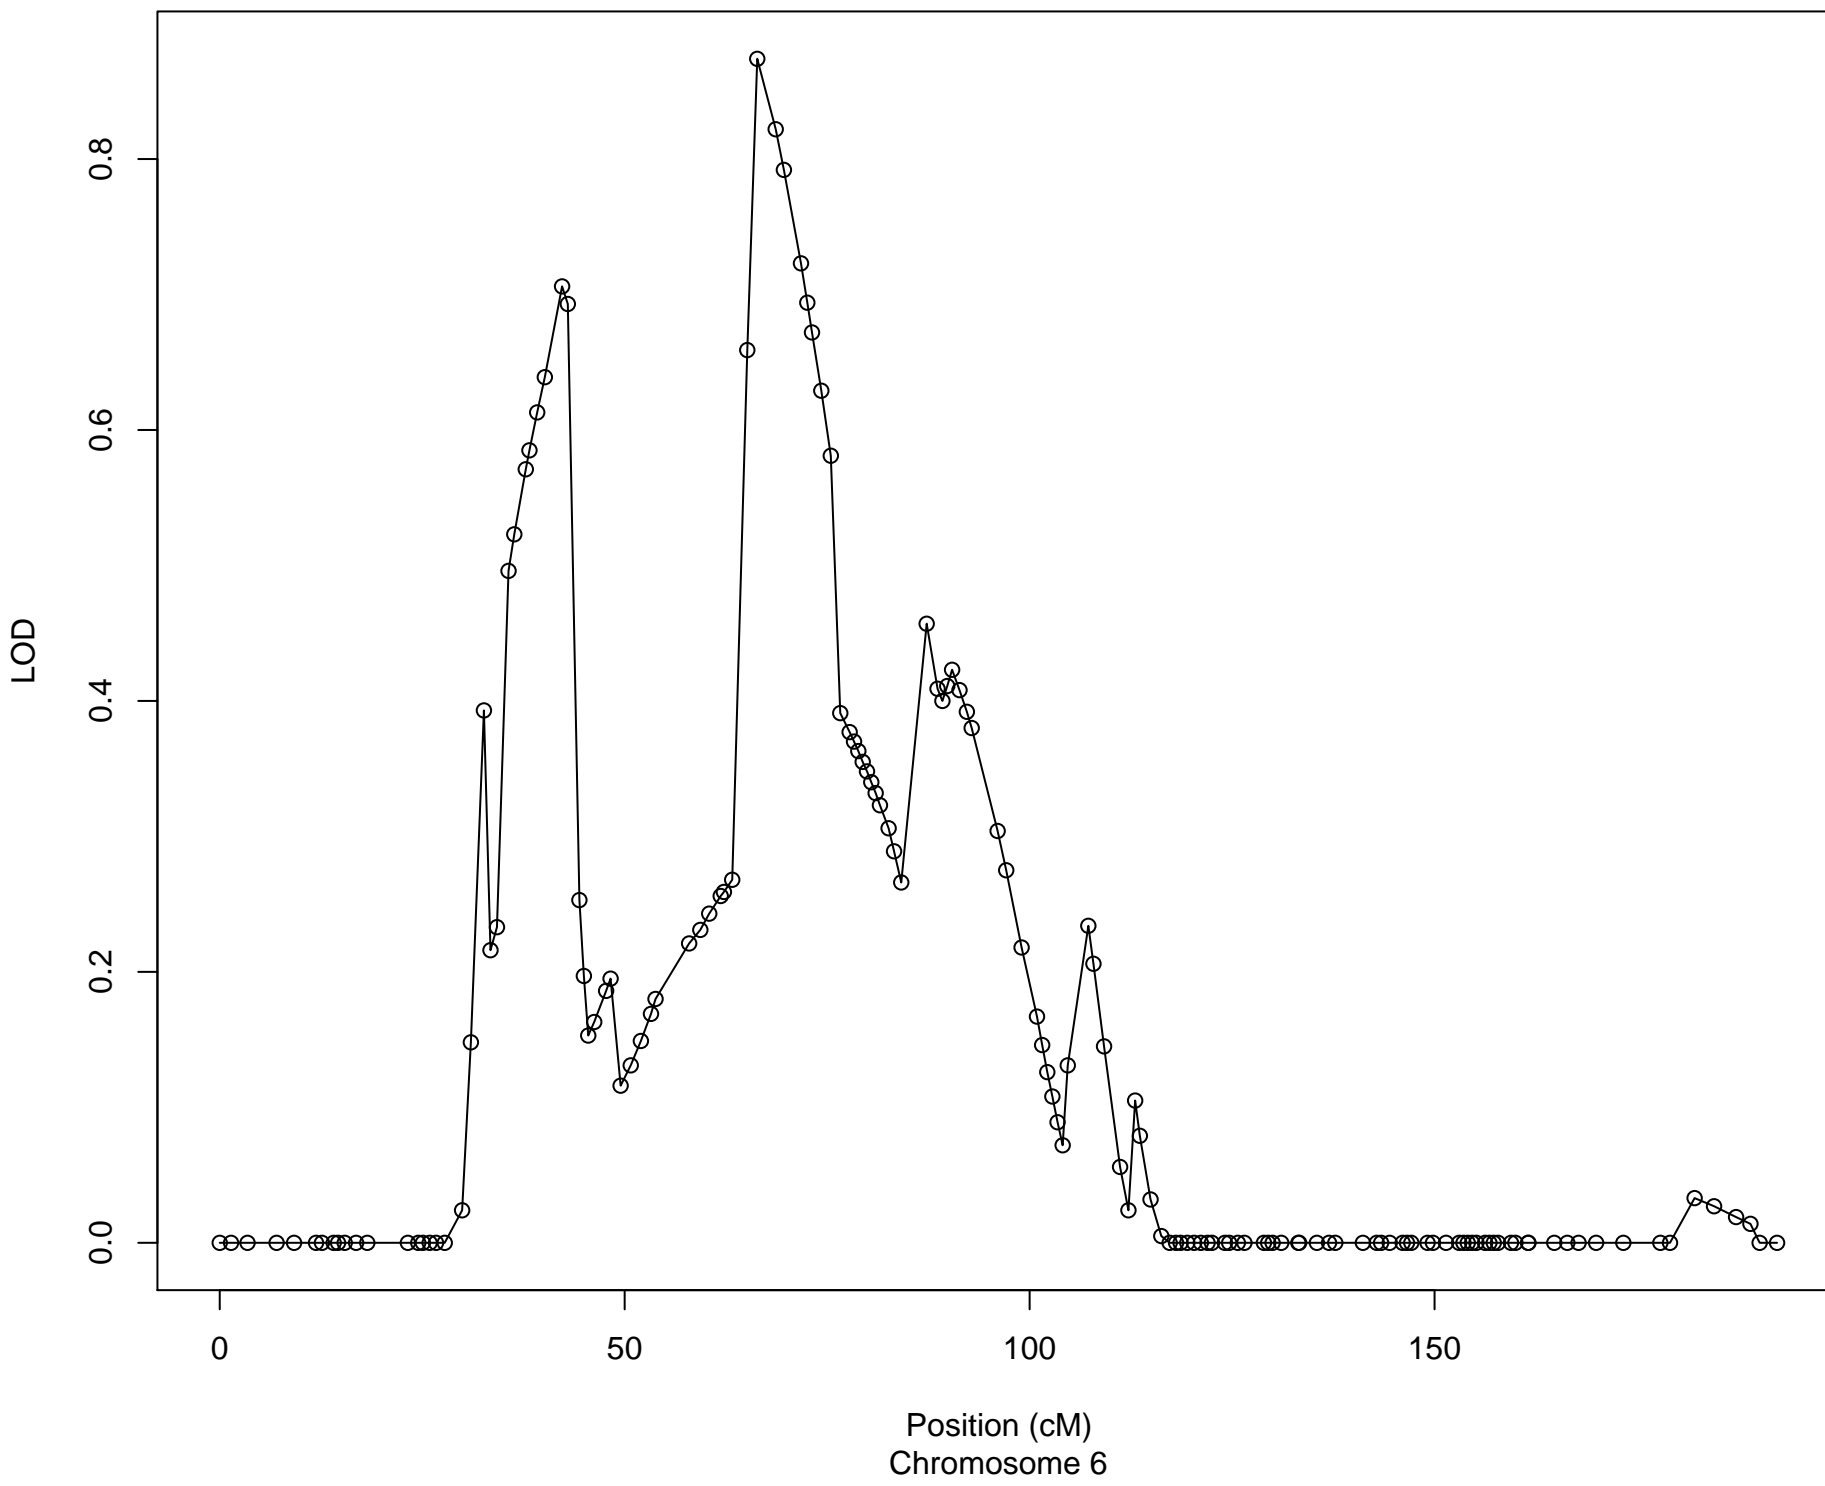

# IC50 (10-methoxy-camptothecin) (IC50\_mCPT)

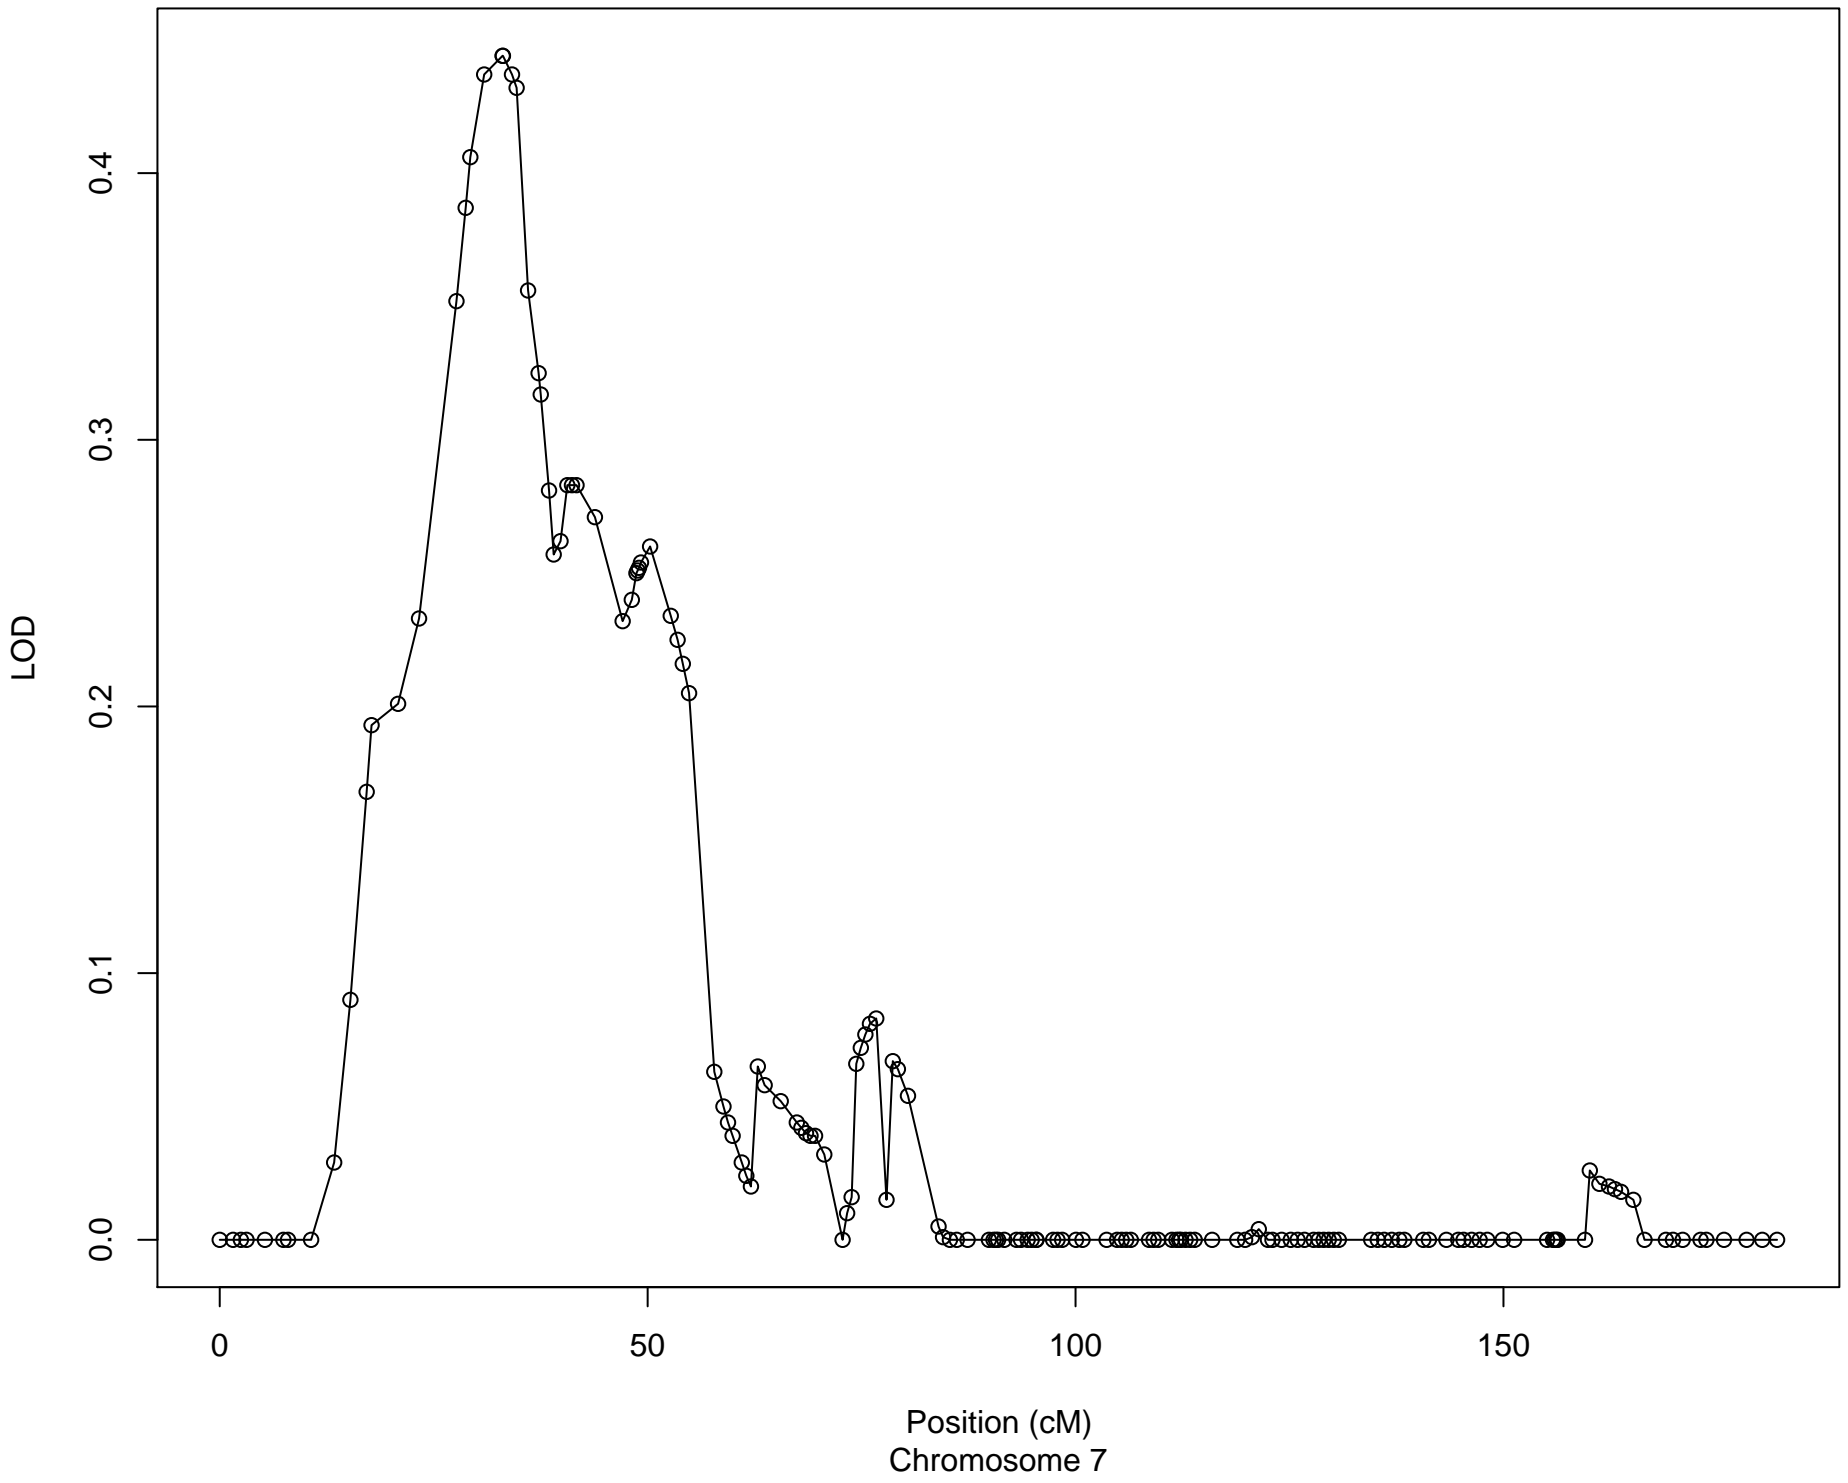

# IC50 (10-methoxy-camptothecin) (IC50\_mCPT)

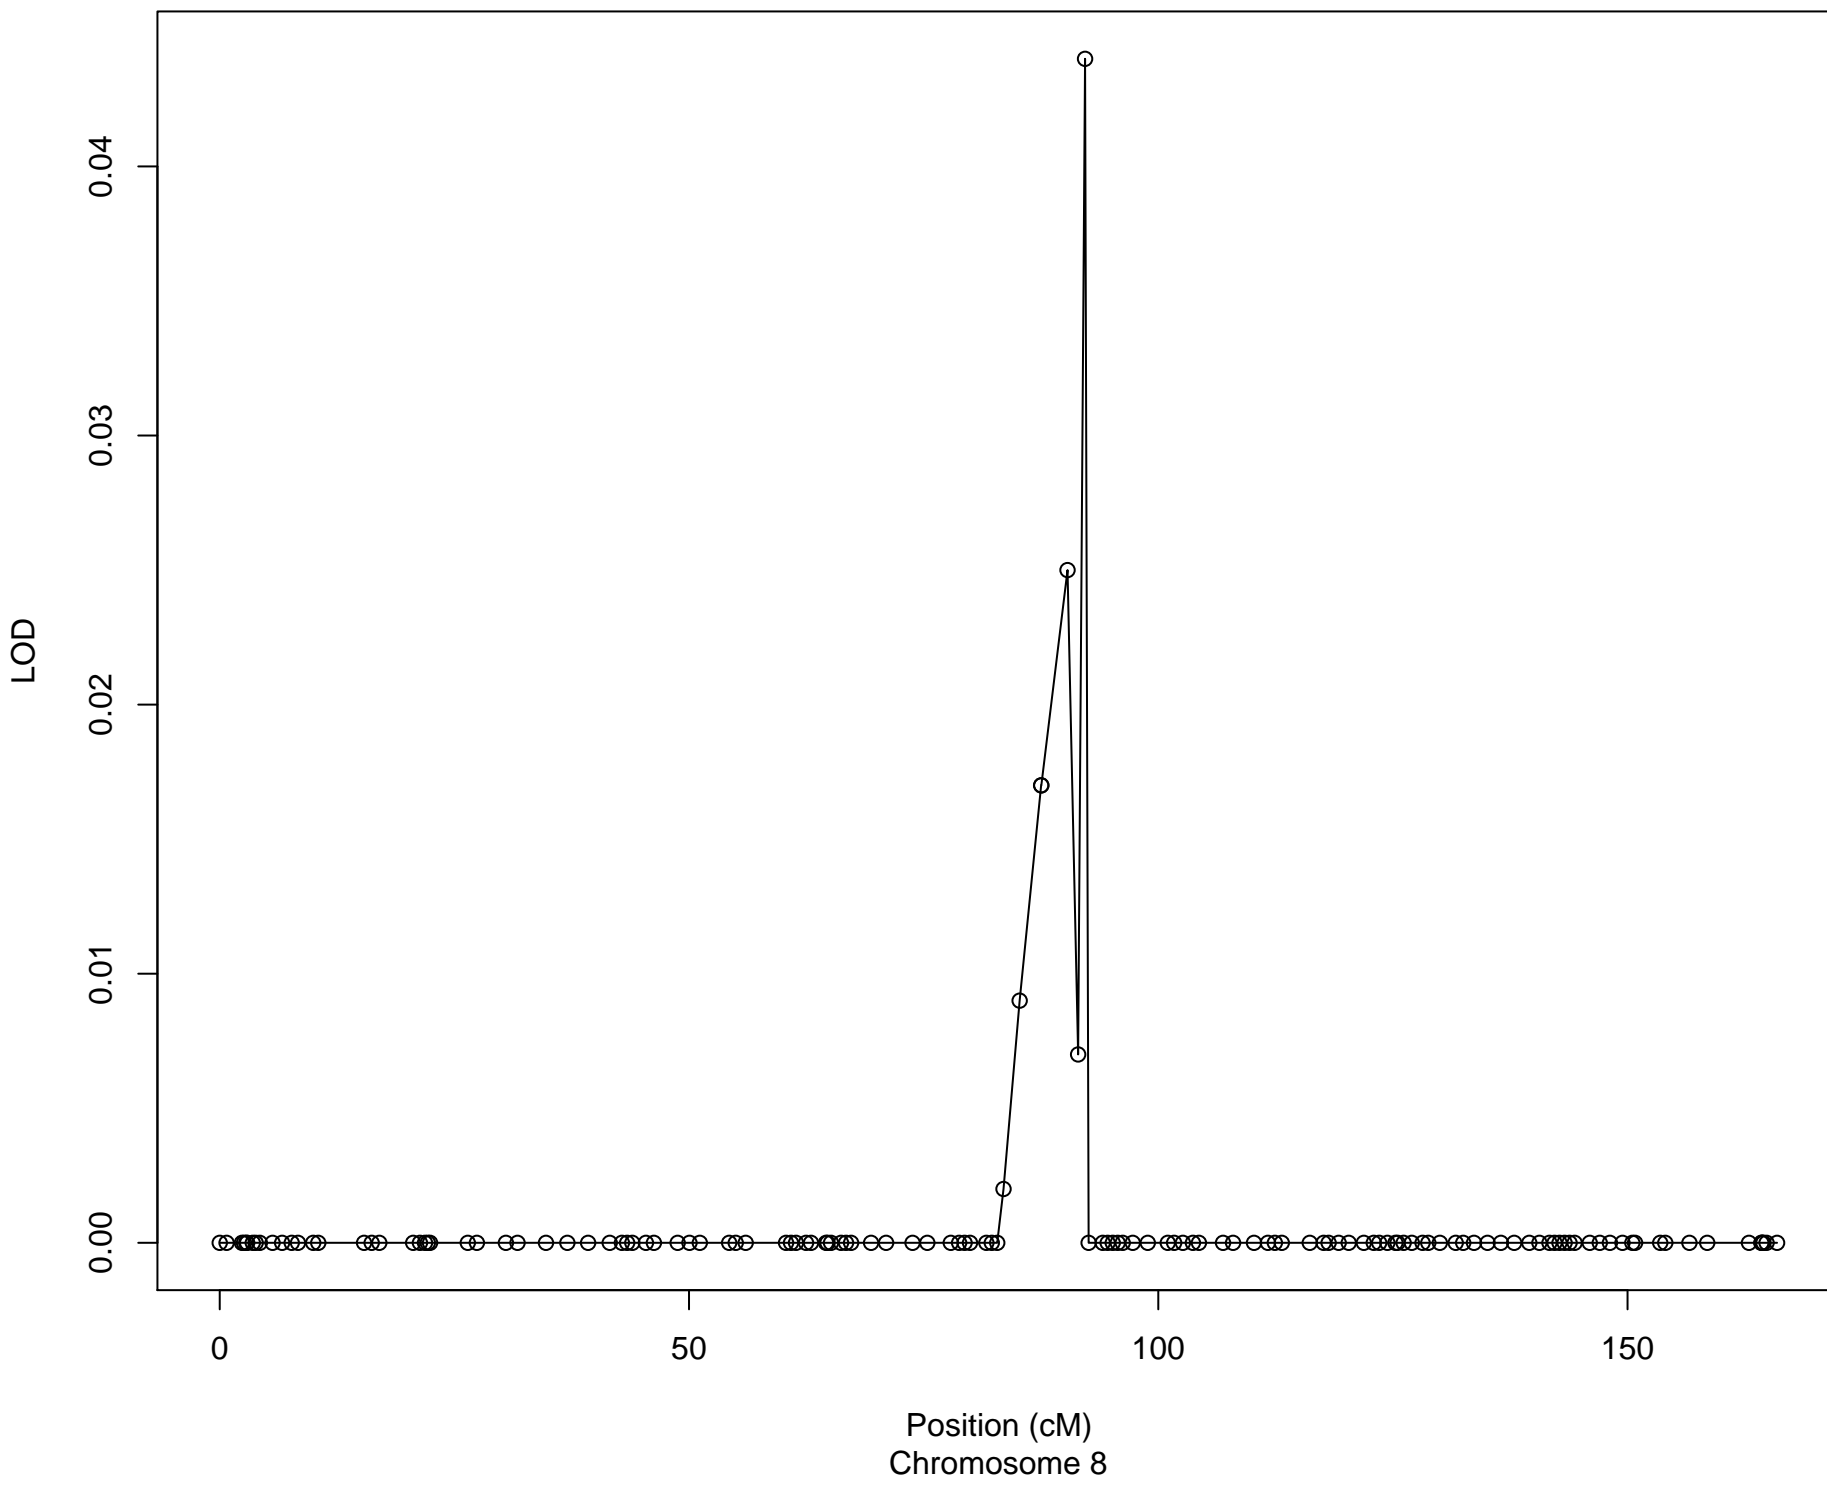



# IC50 (10-methoxy-camptothecin) (IC50\_mCPT)

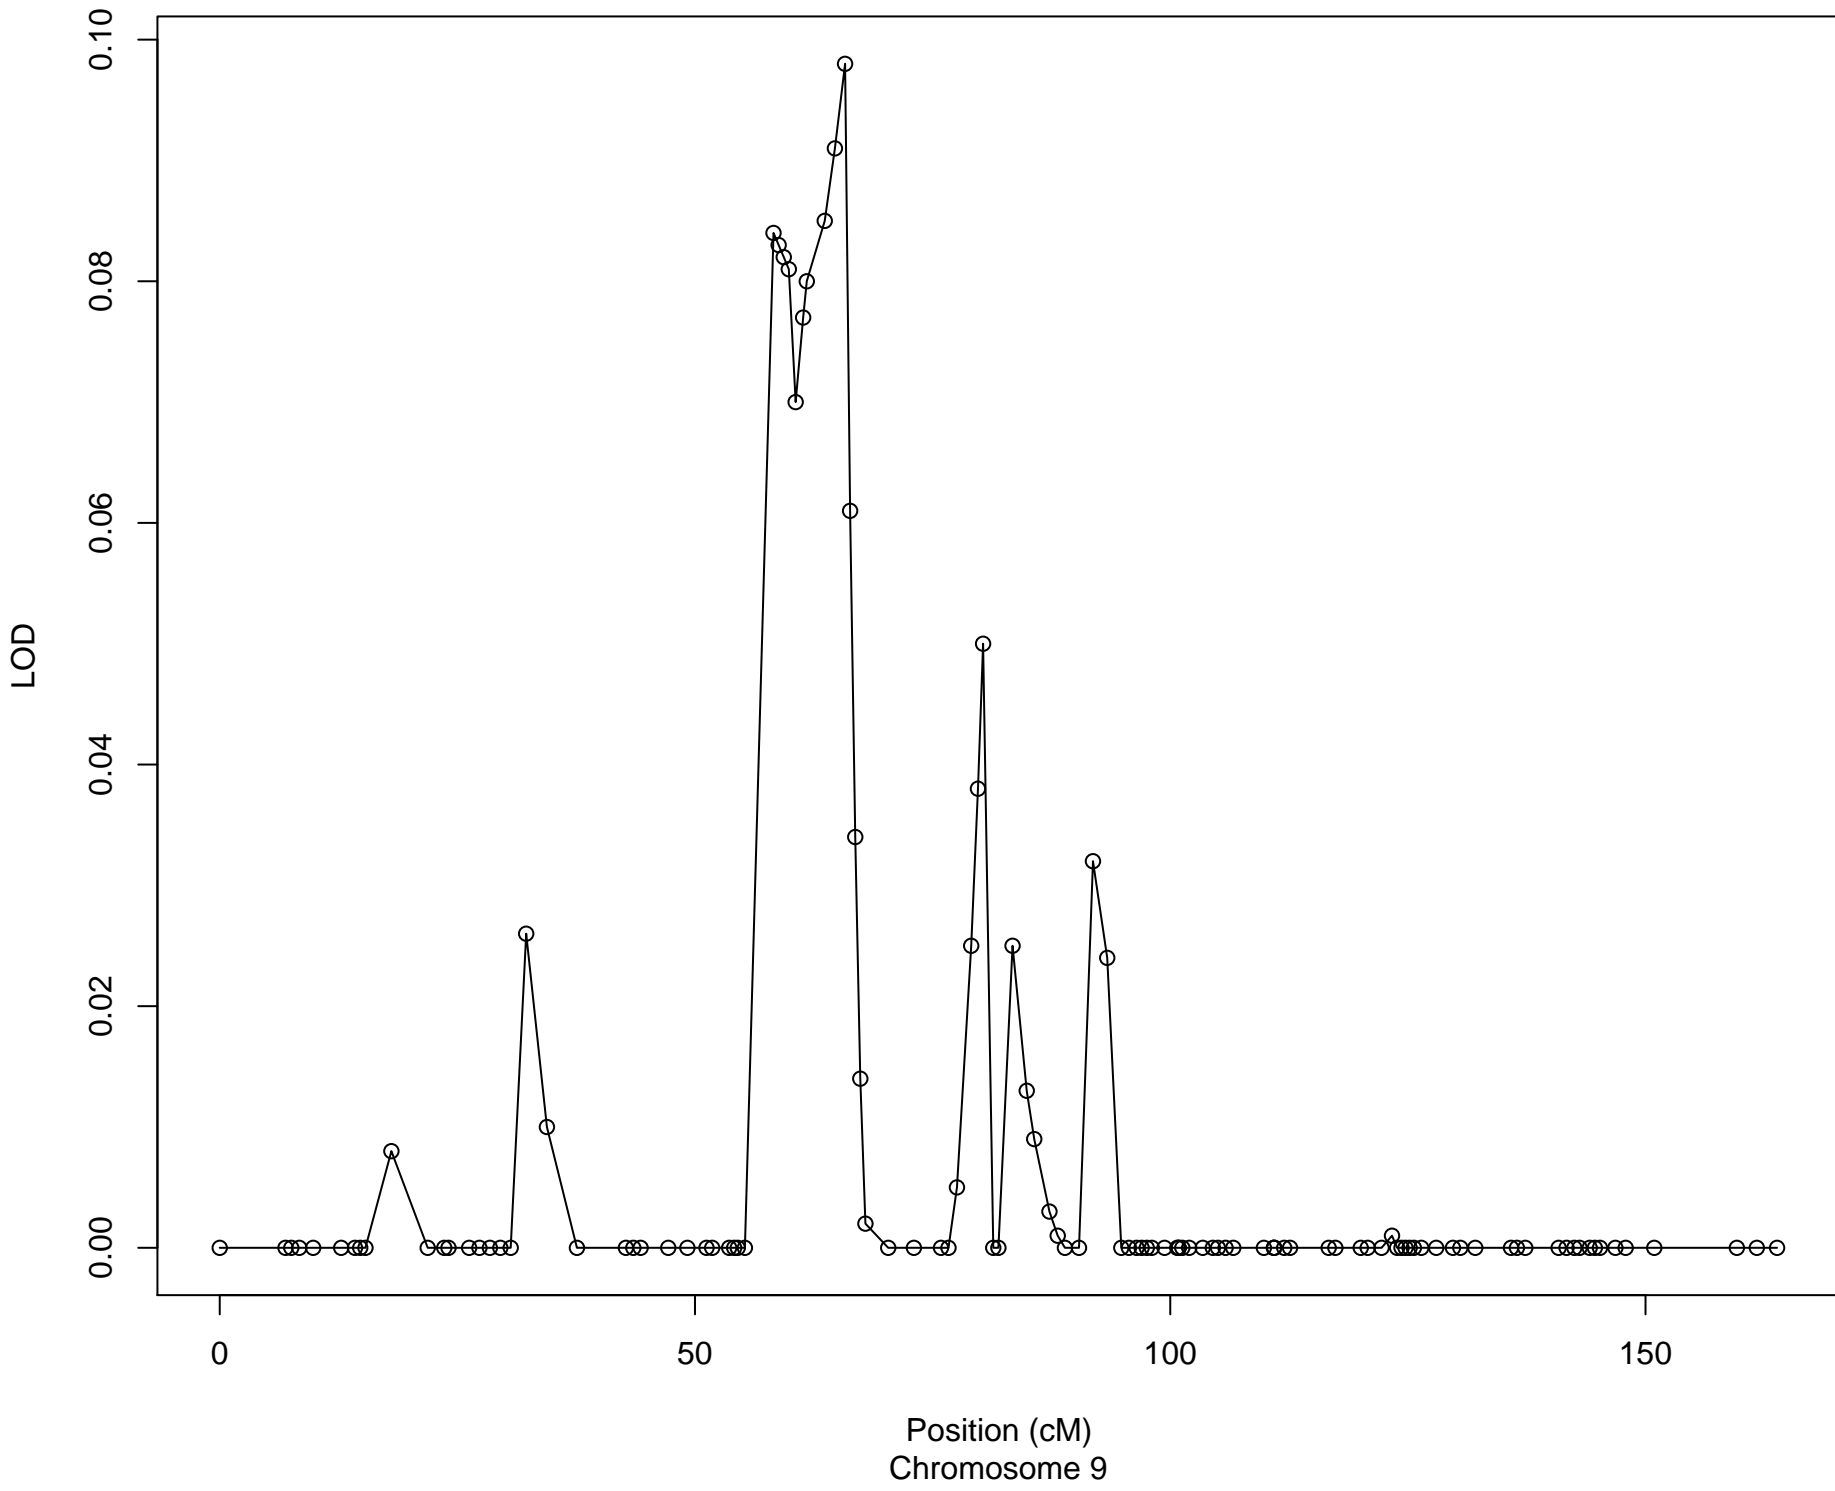

# IC50 (10-methoxy-camptothecin) (IC50\_mCPT)

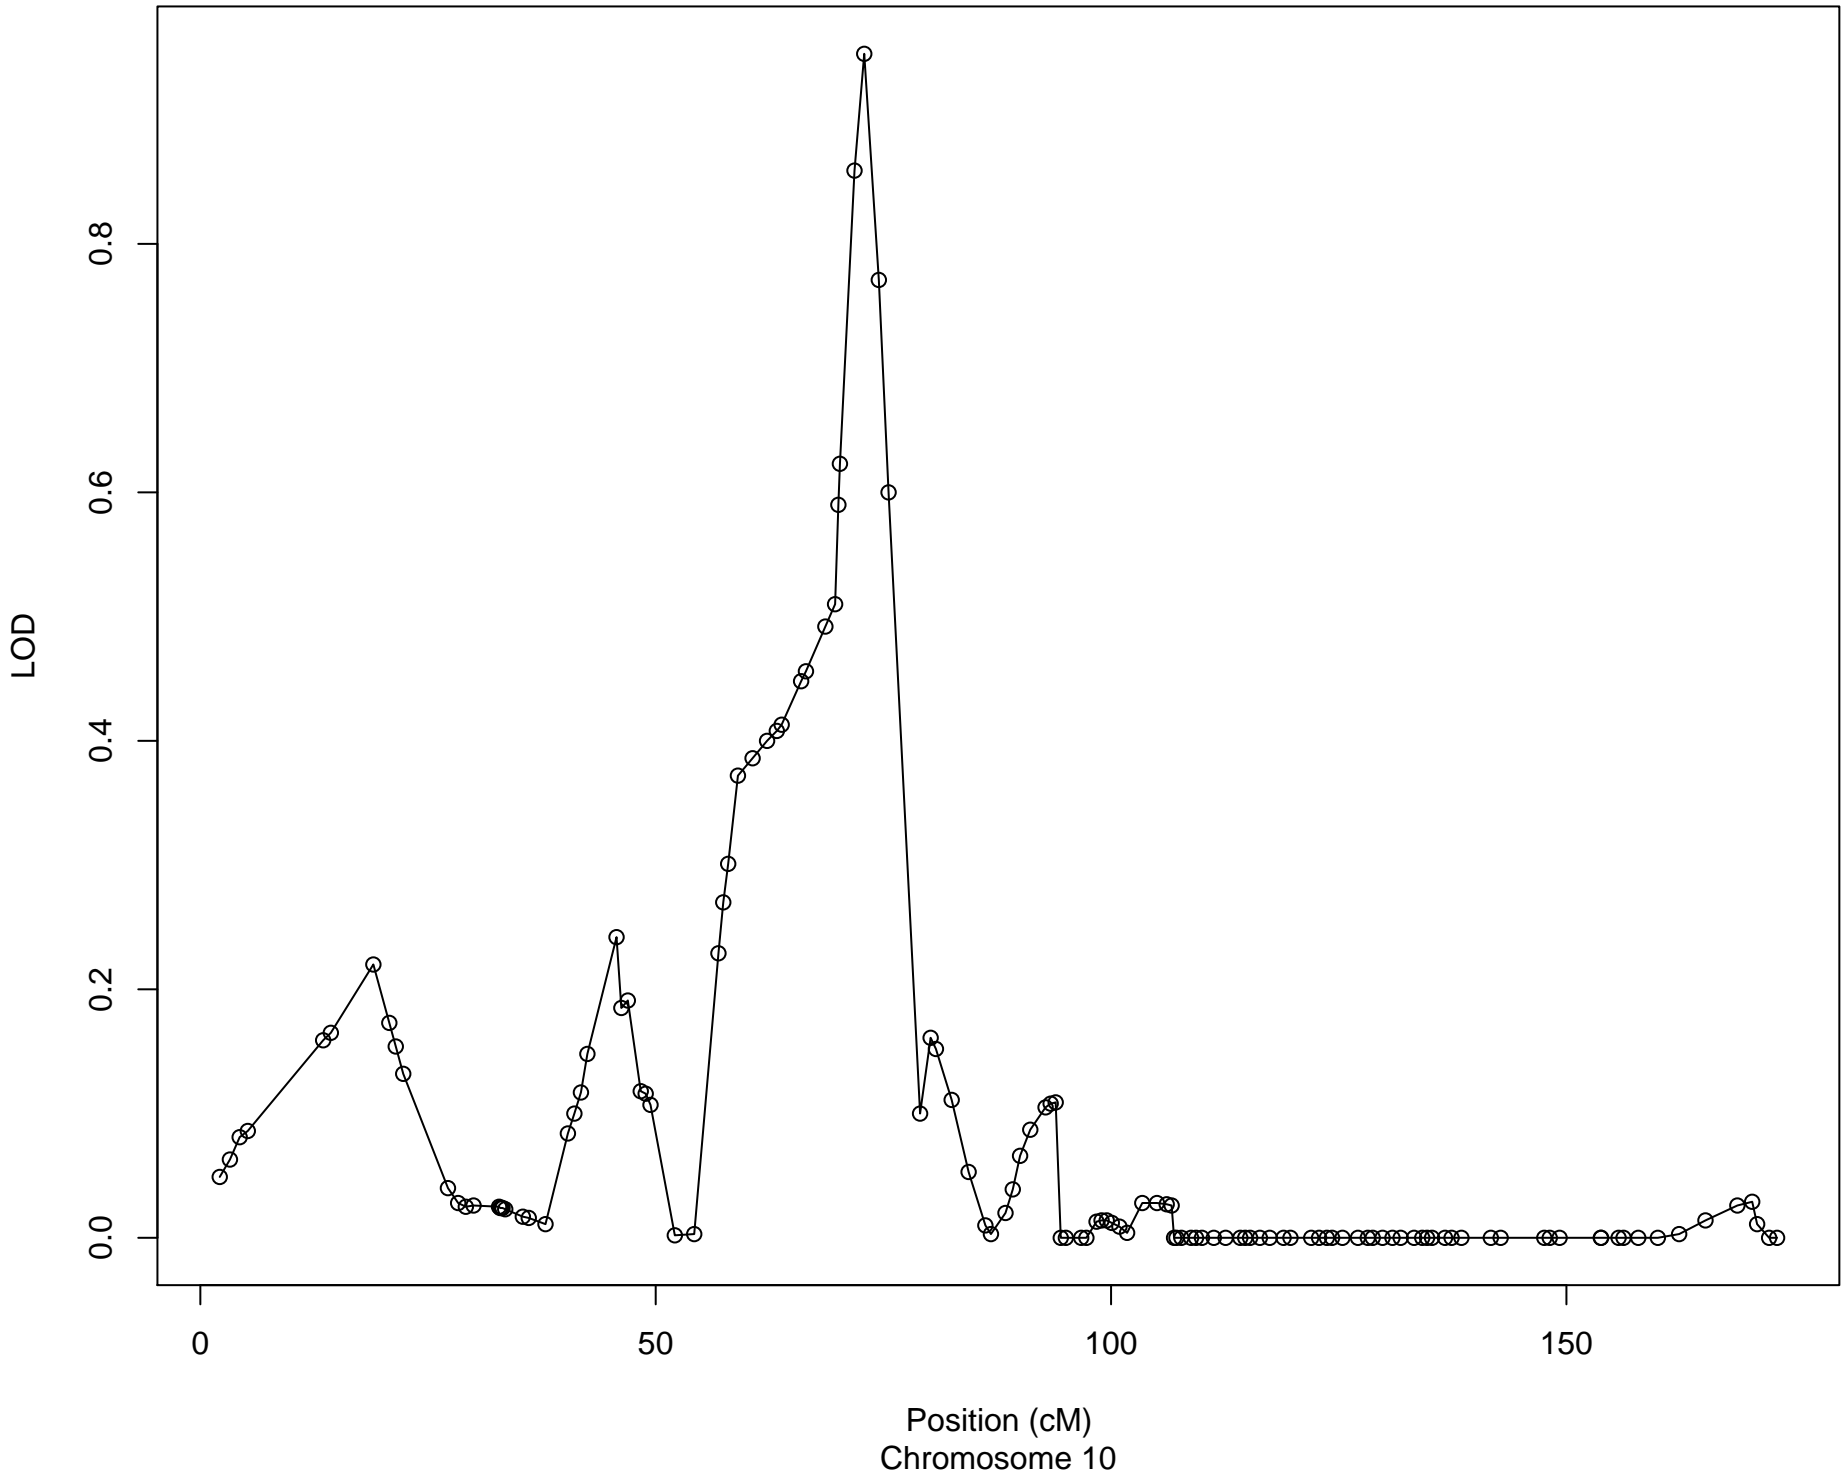

# IC50 (10-methoxy-camptothecin) (IC50\_mCPT)

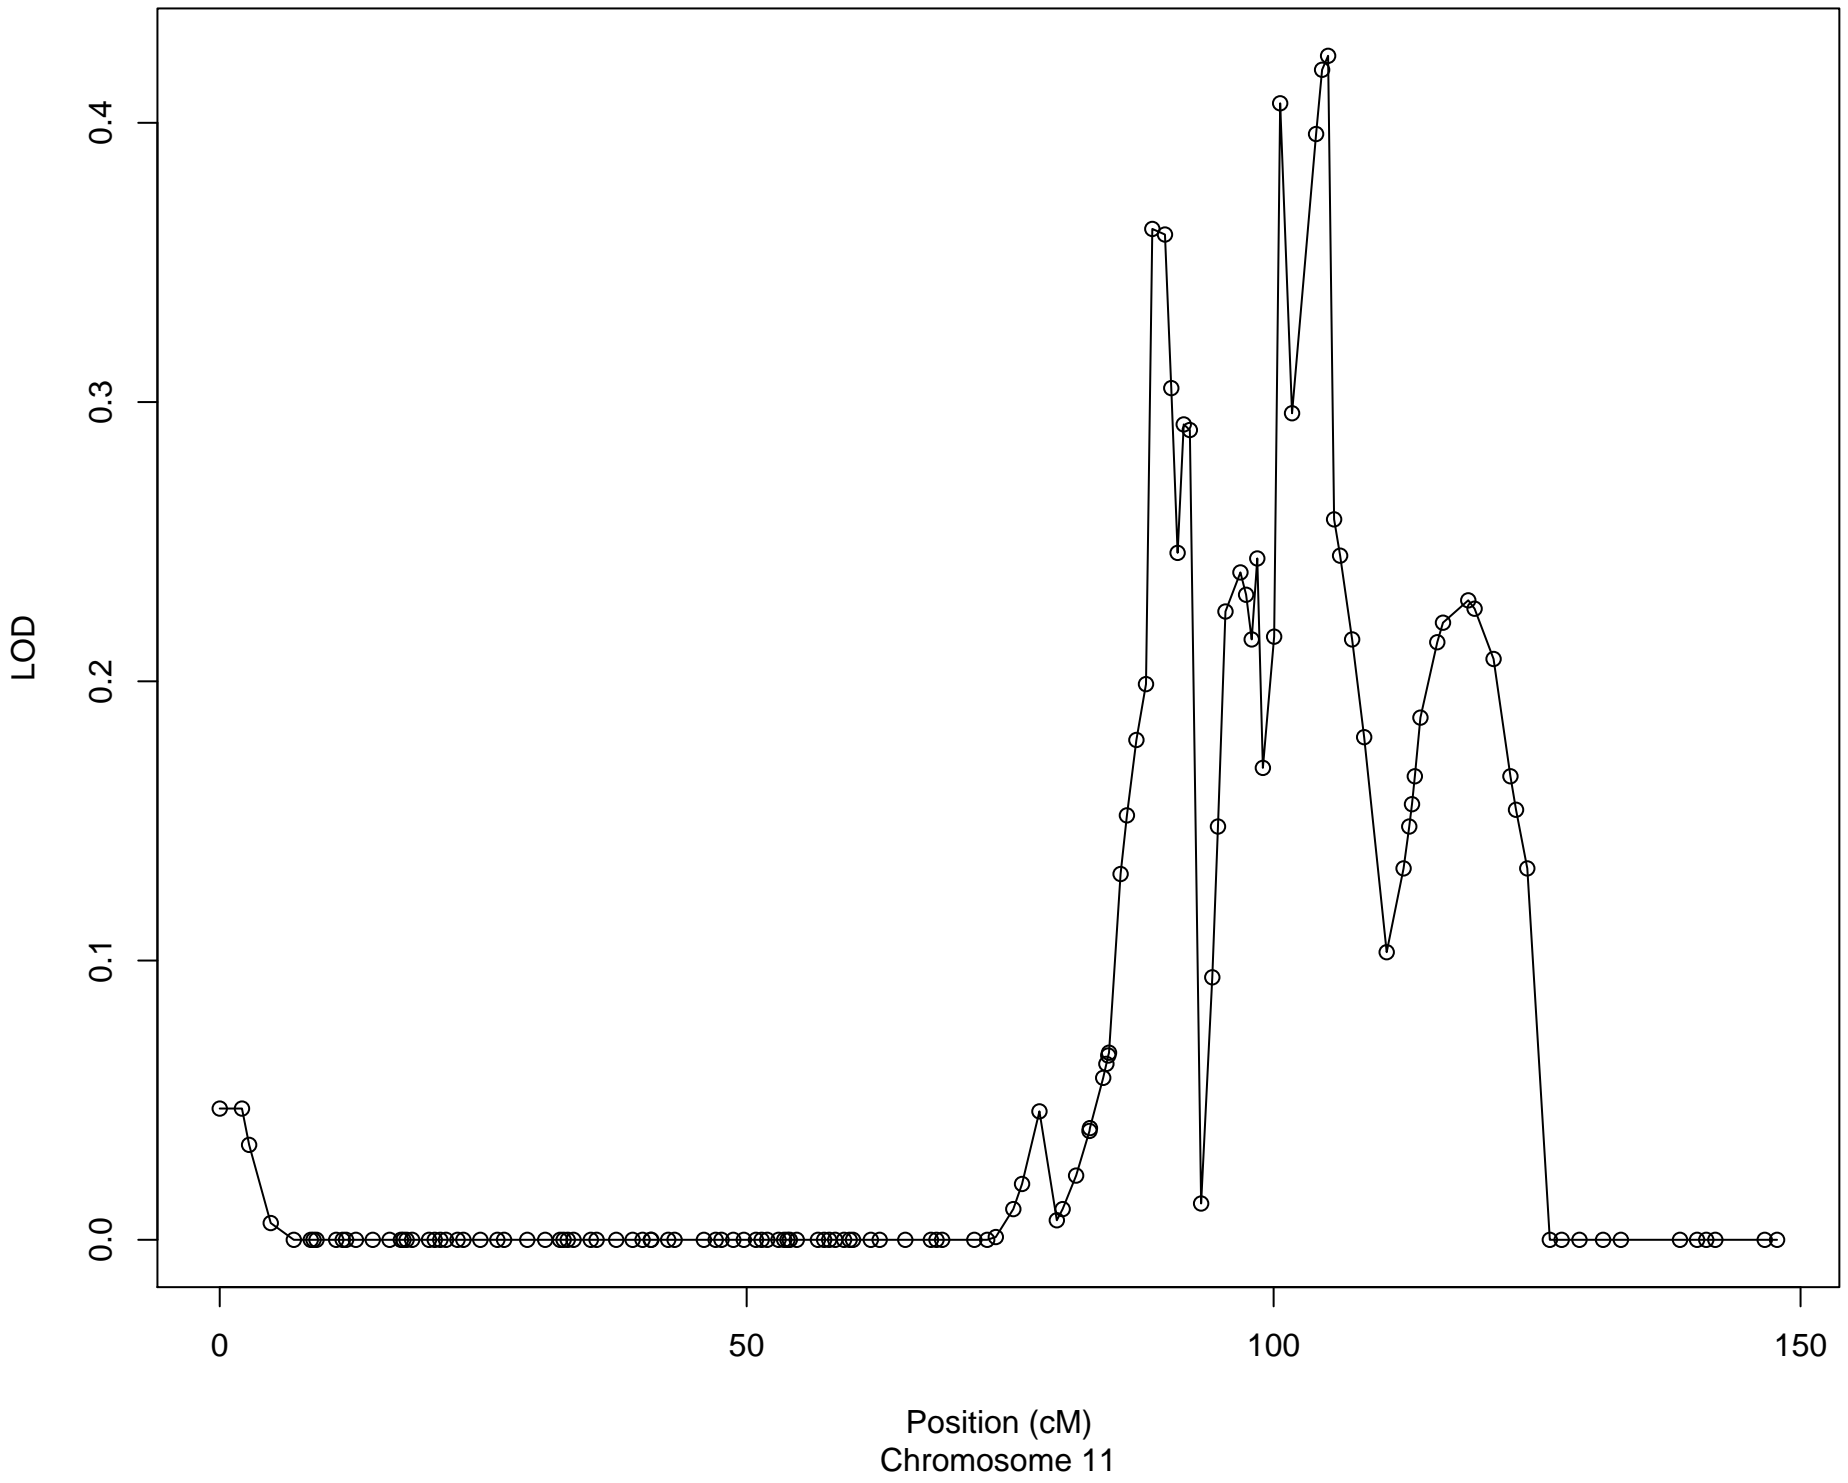

# IC50 (10-methoxy-camptothecin) (IC50\_mCPT)

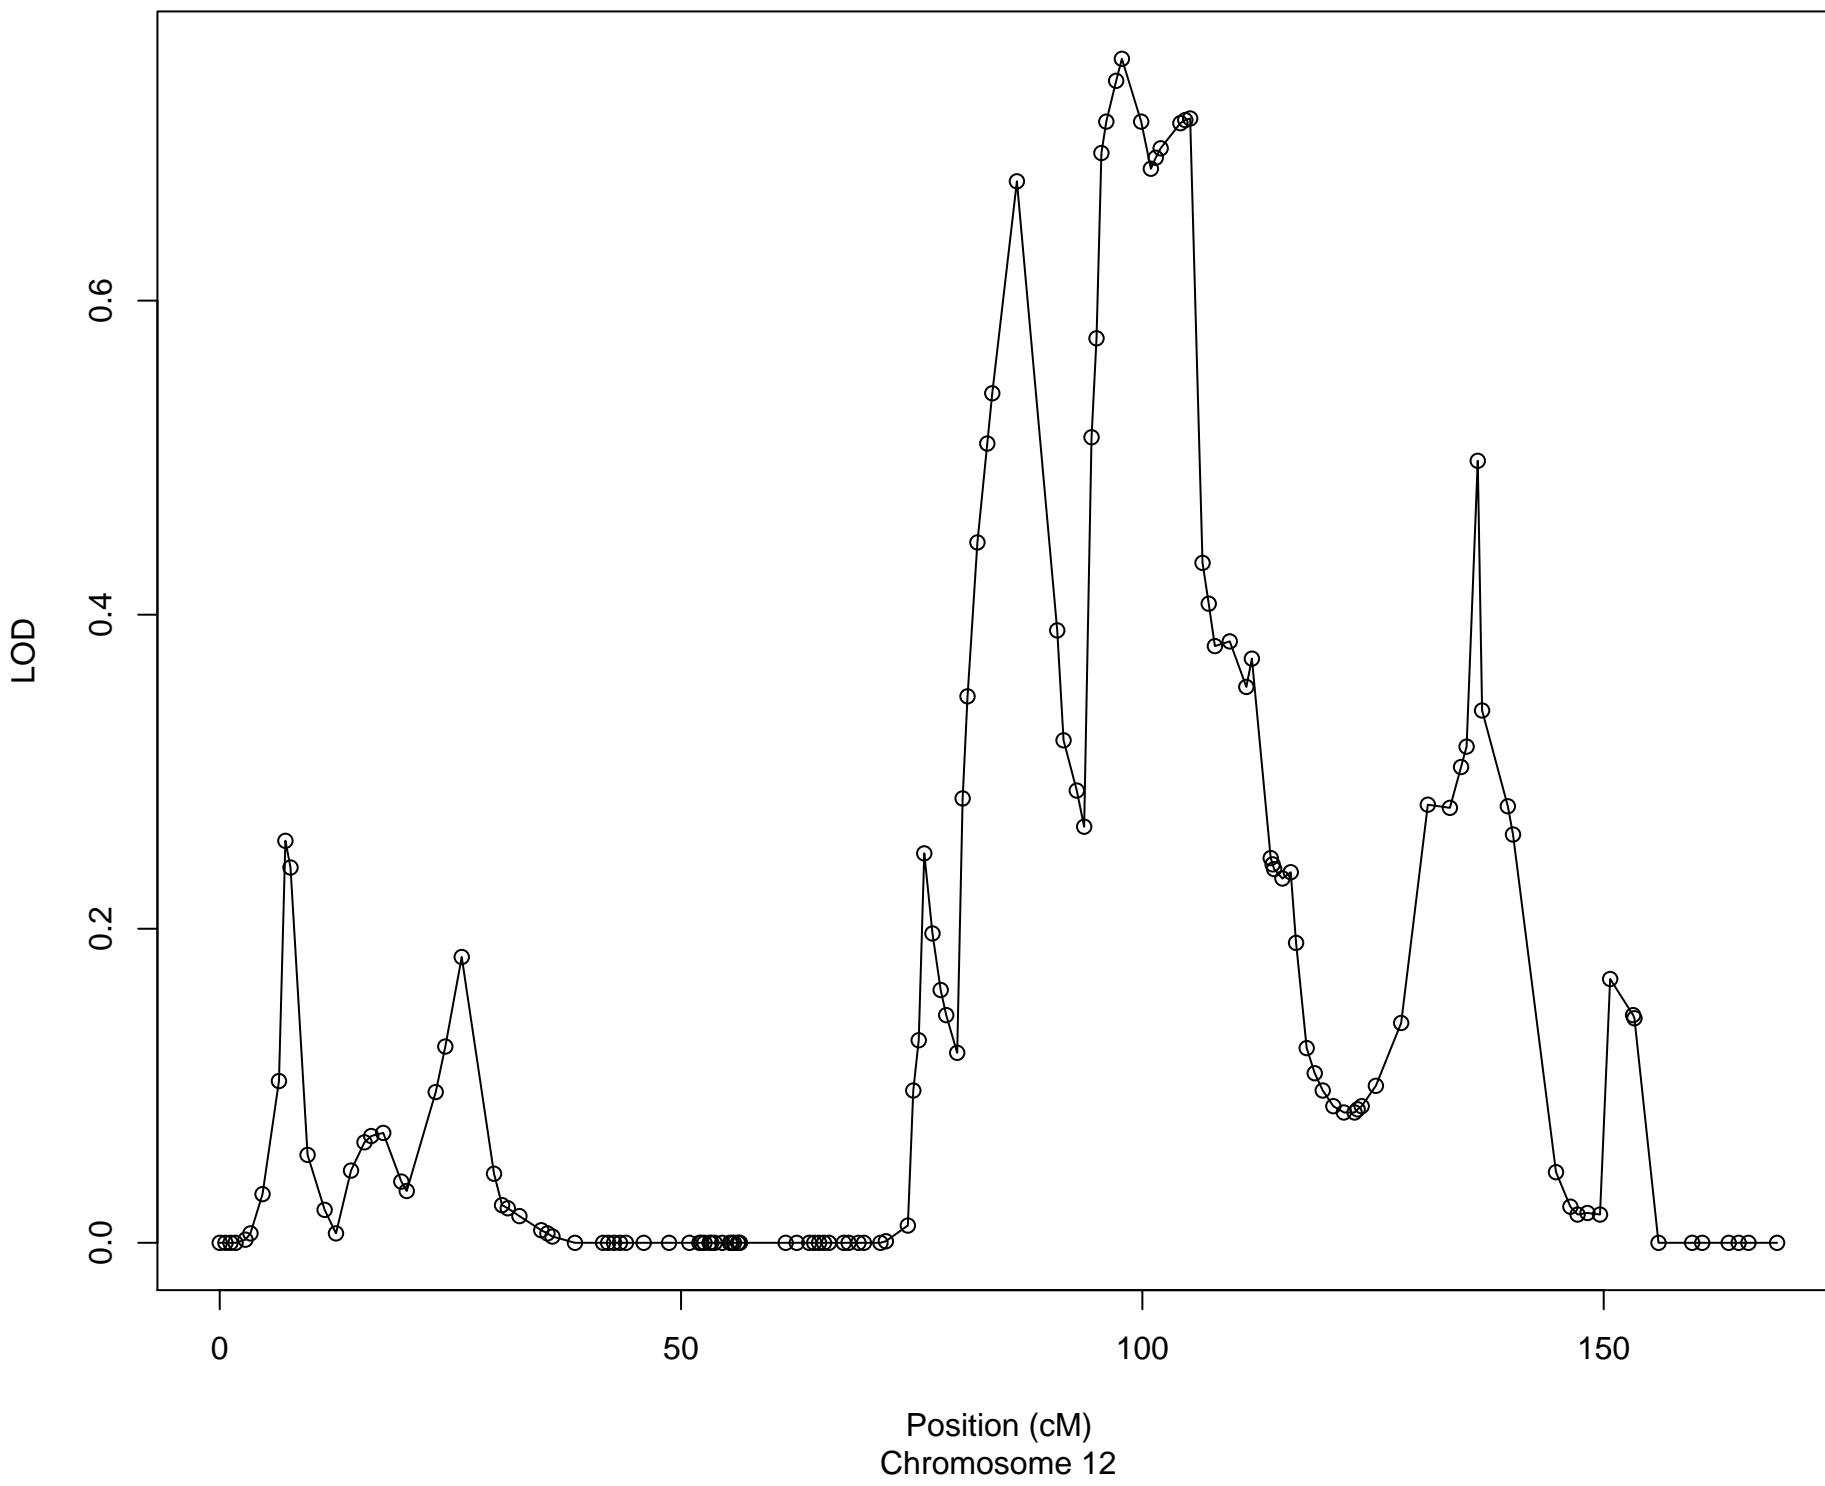

# IC50 (10-methoxy-camptothecin) (IC50\_mCPT)

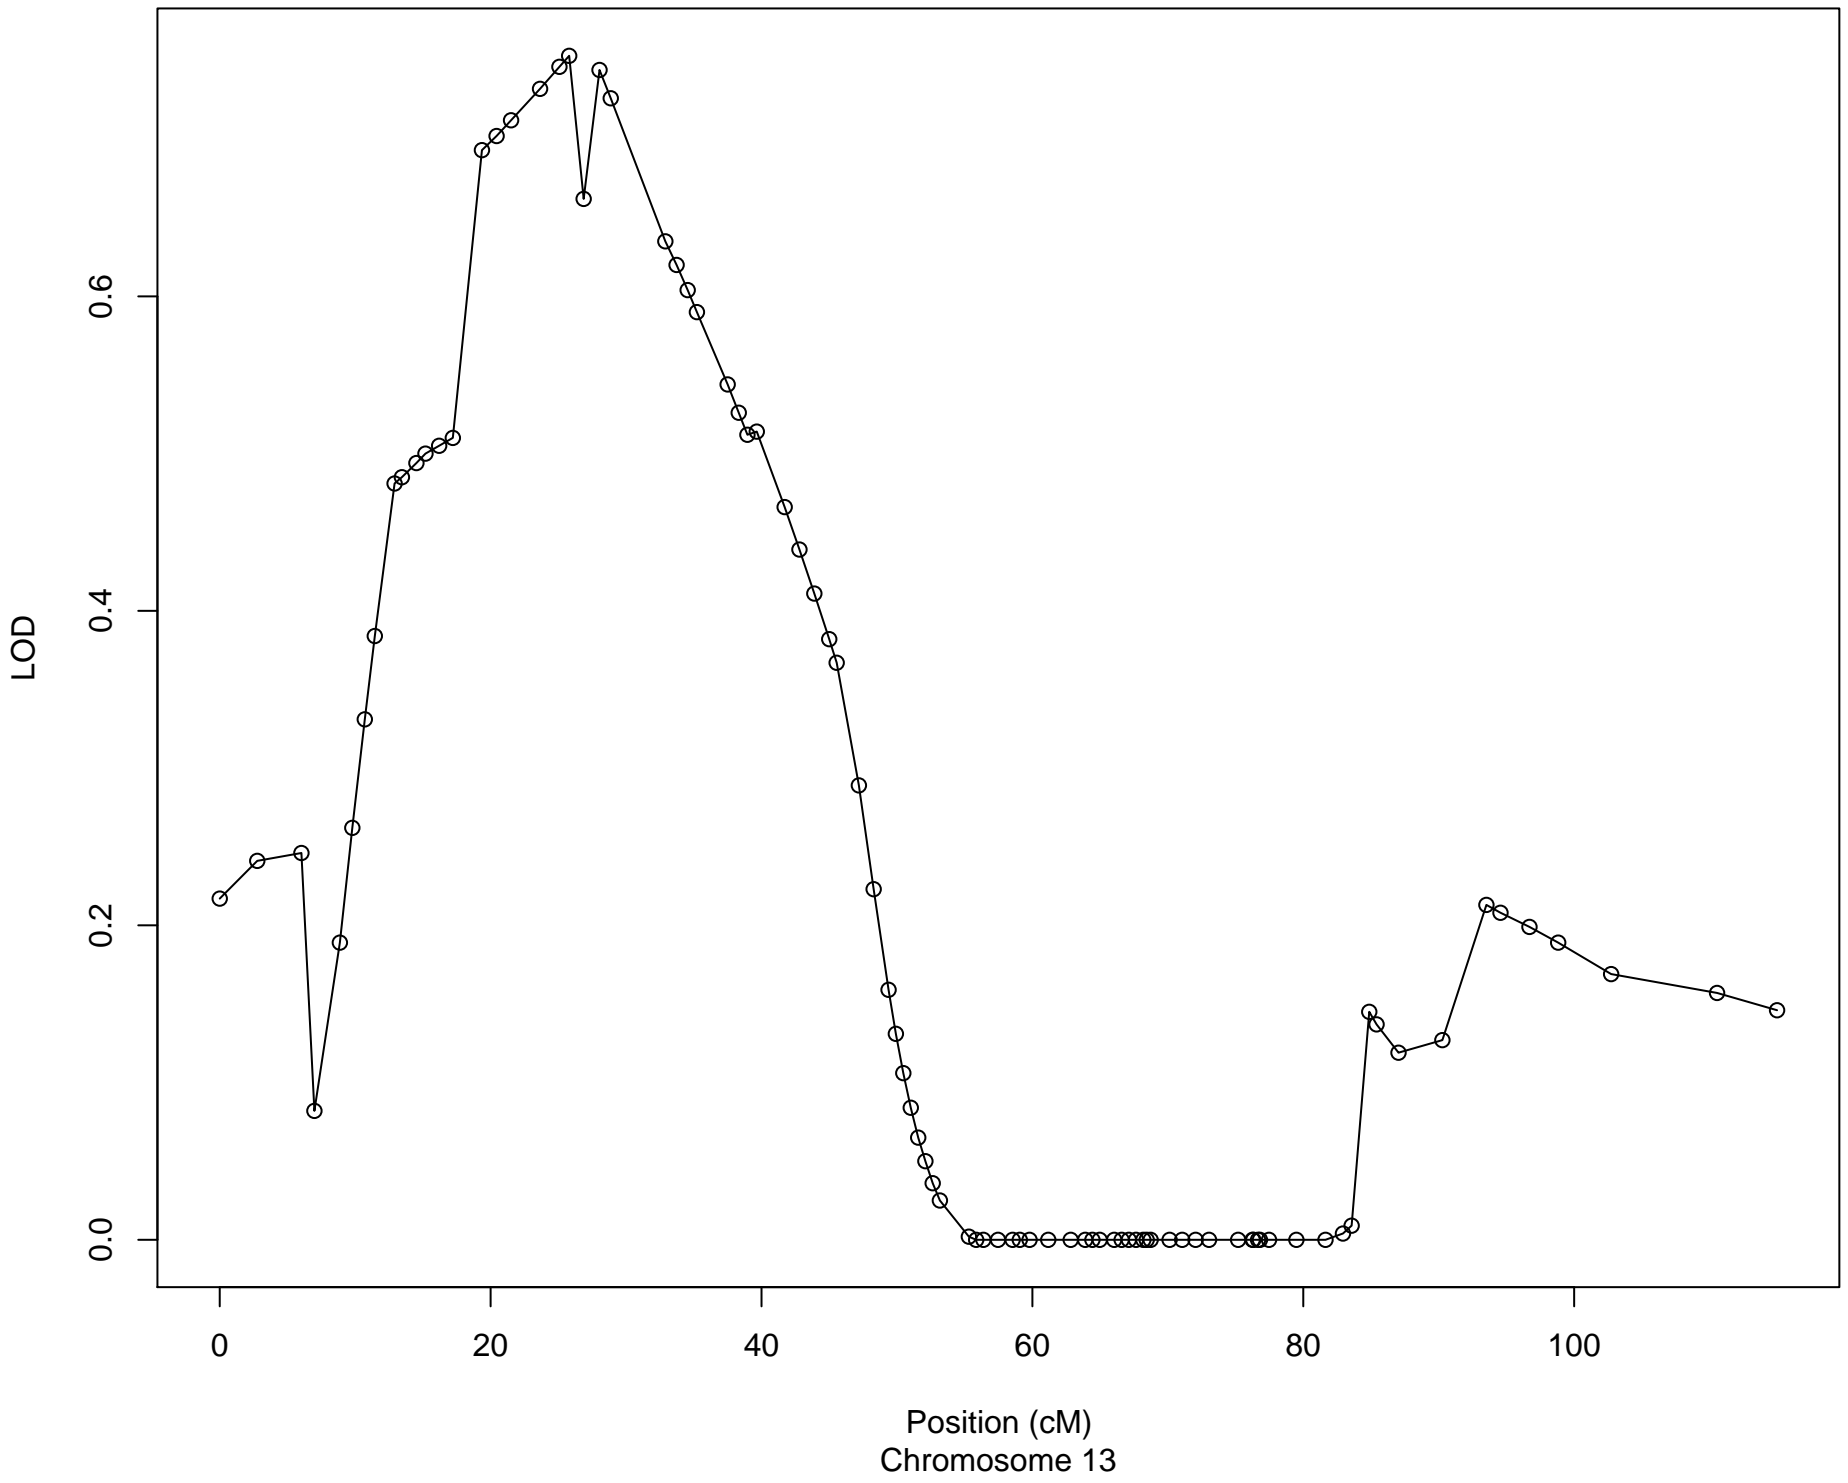

# IC50 (10-methoxy-camptothecin) (IC50\_mCPT)

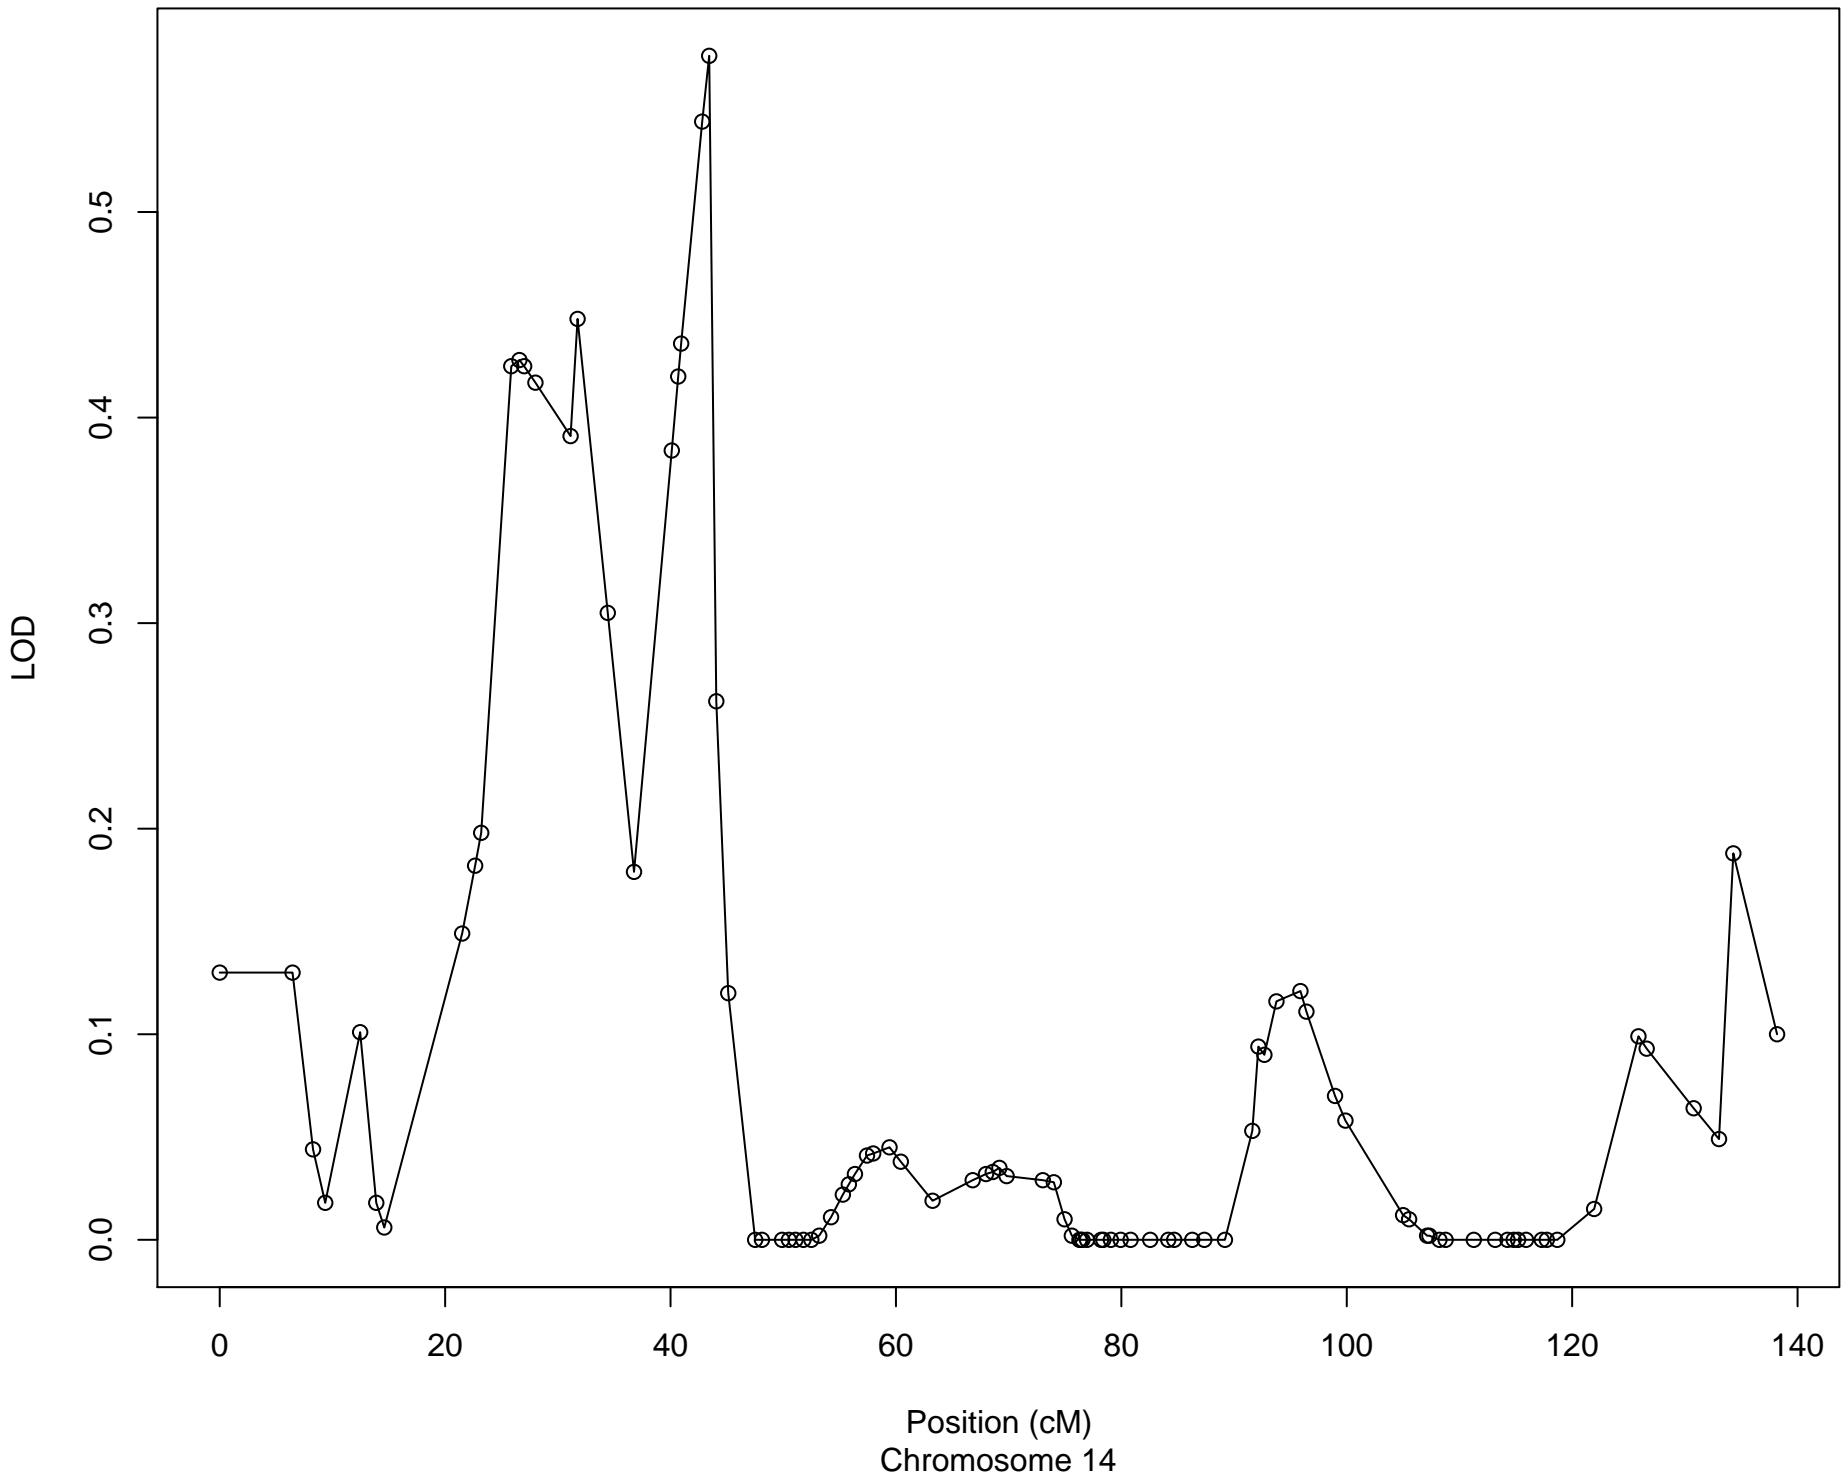

# IC50 (10-methoxy-camptothecin) (IC50\_mCPT)

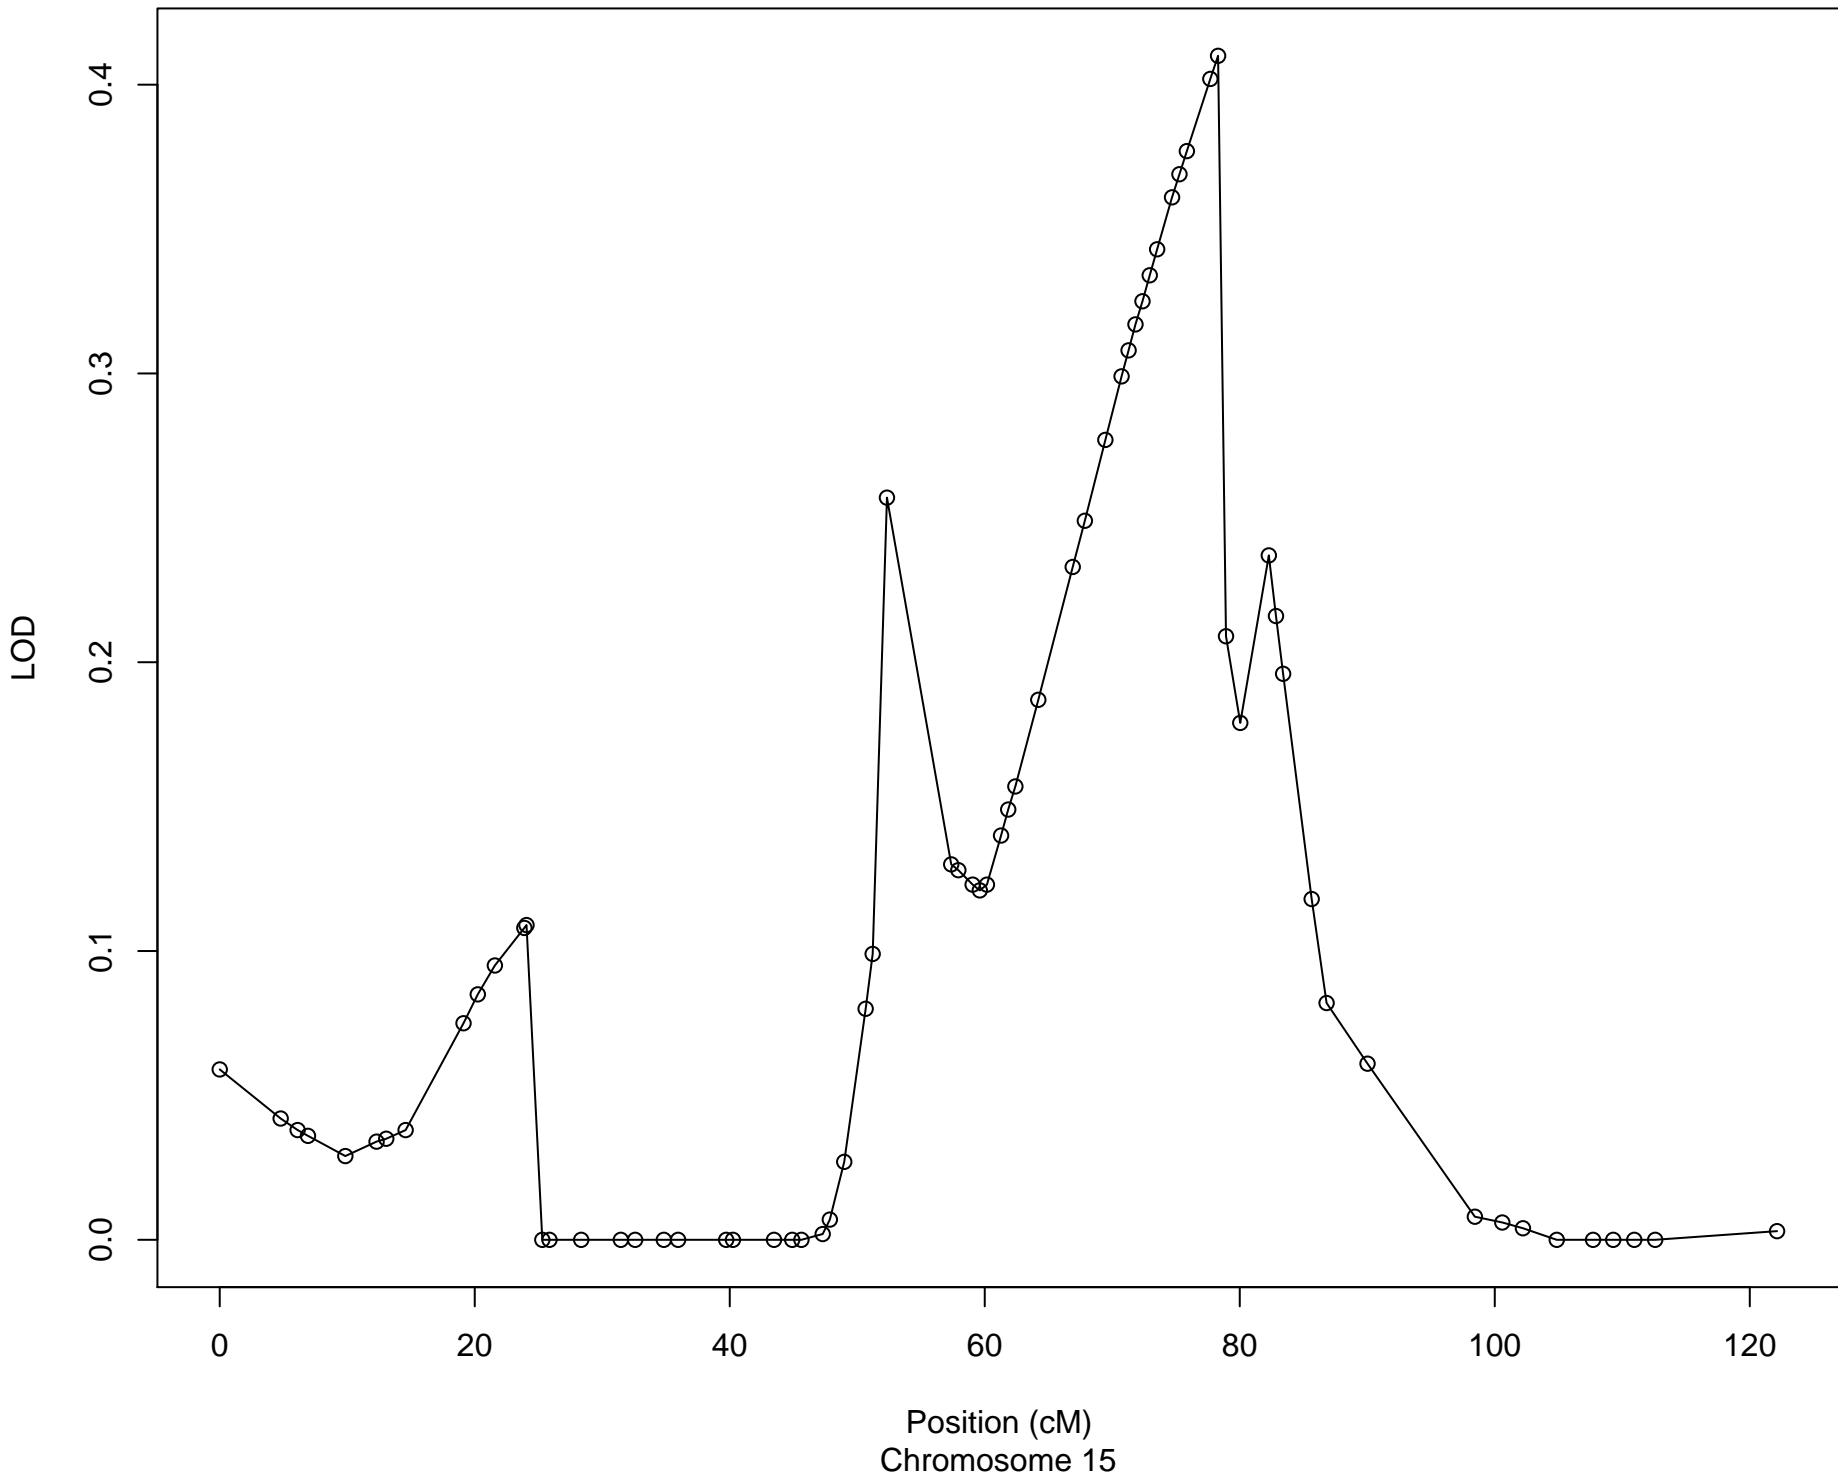

# IC50 (10-methoxy-camptothecin) (IC50\_mCPT)

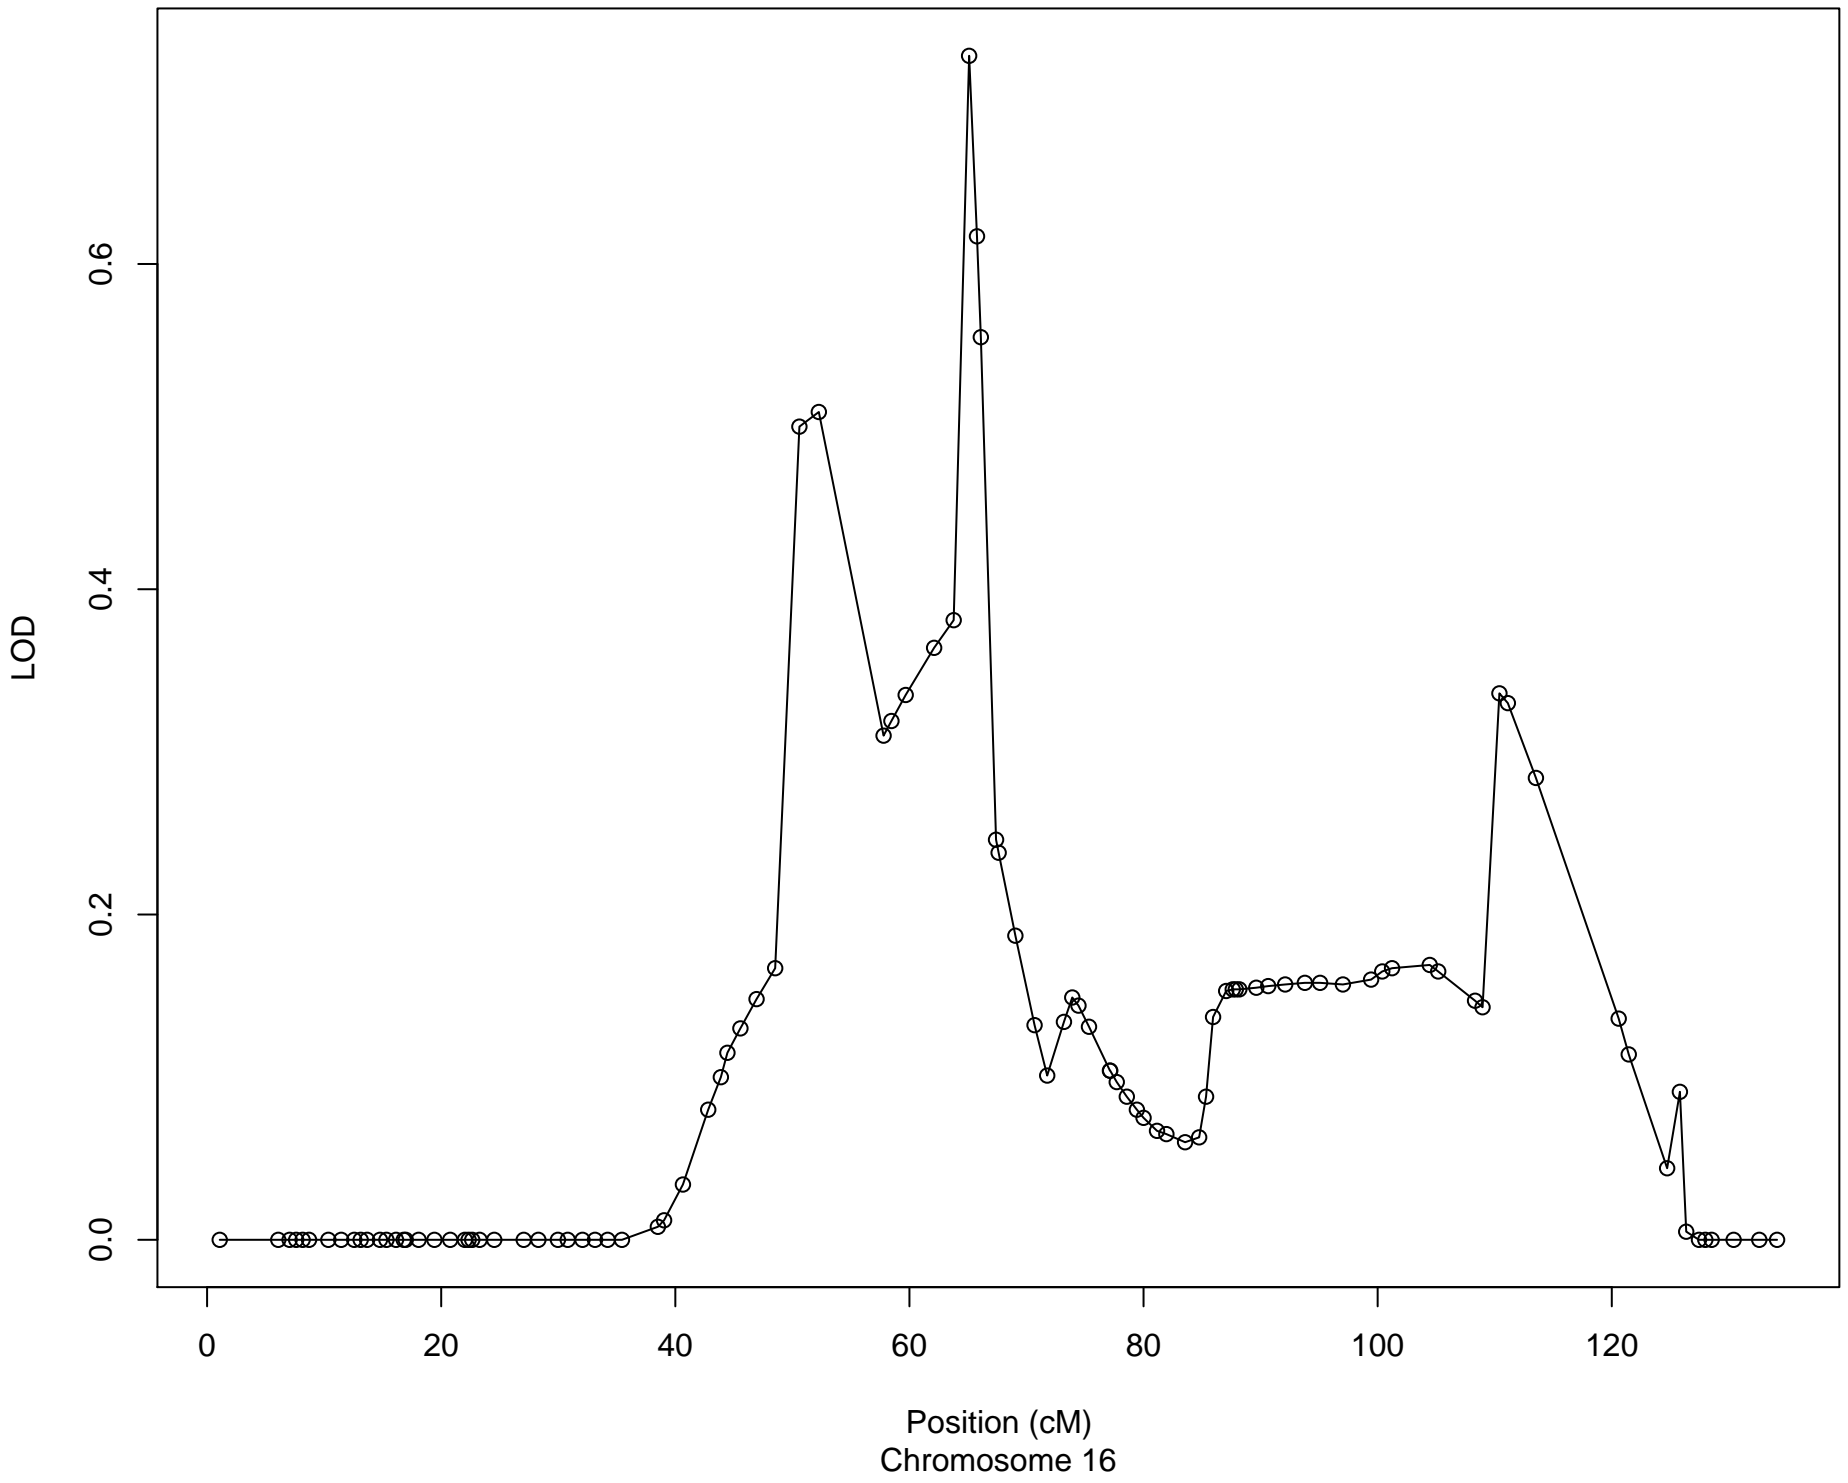



# IC50 (10-methoxy-camptothecin) (IC50\_mCPT)

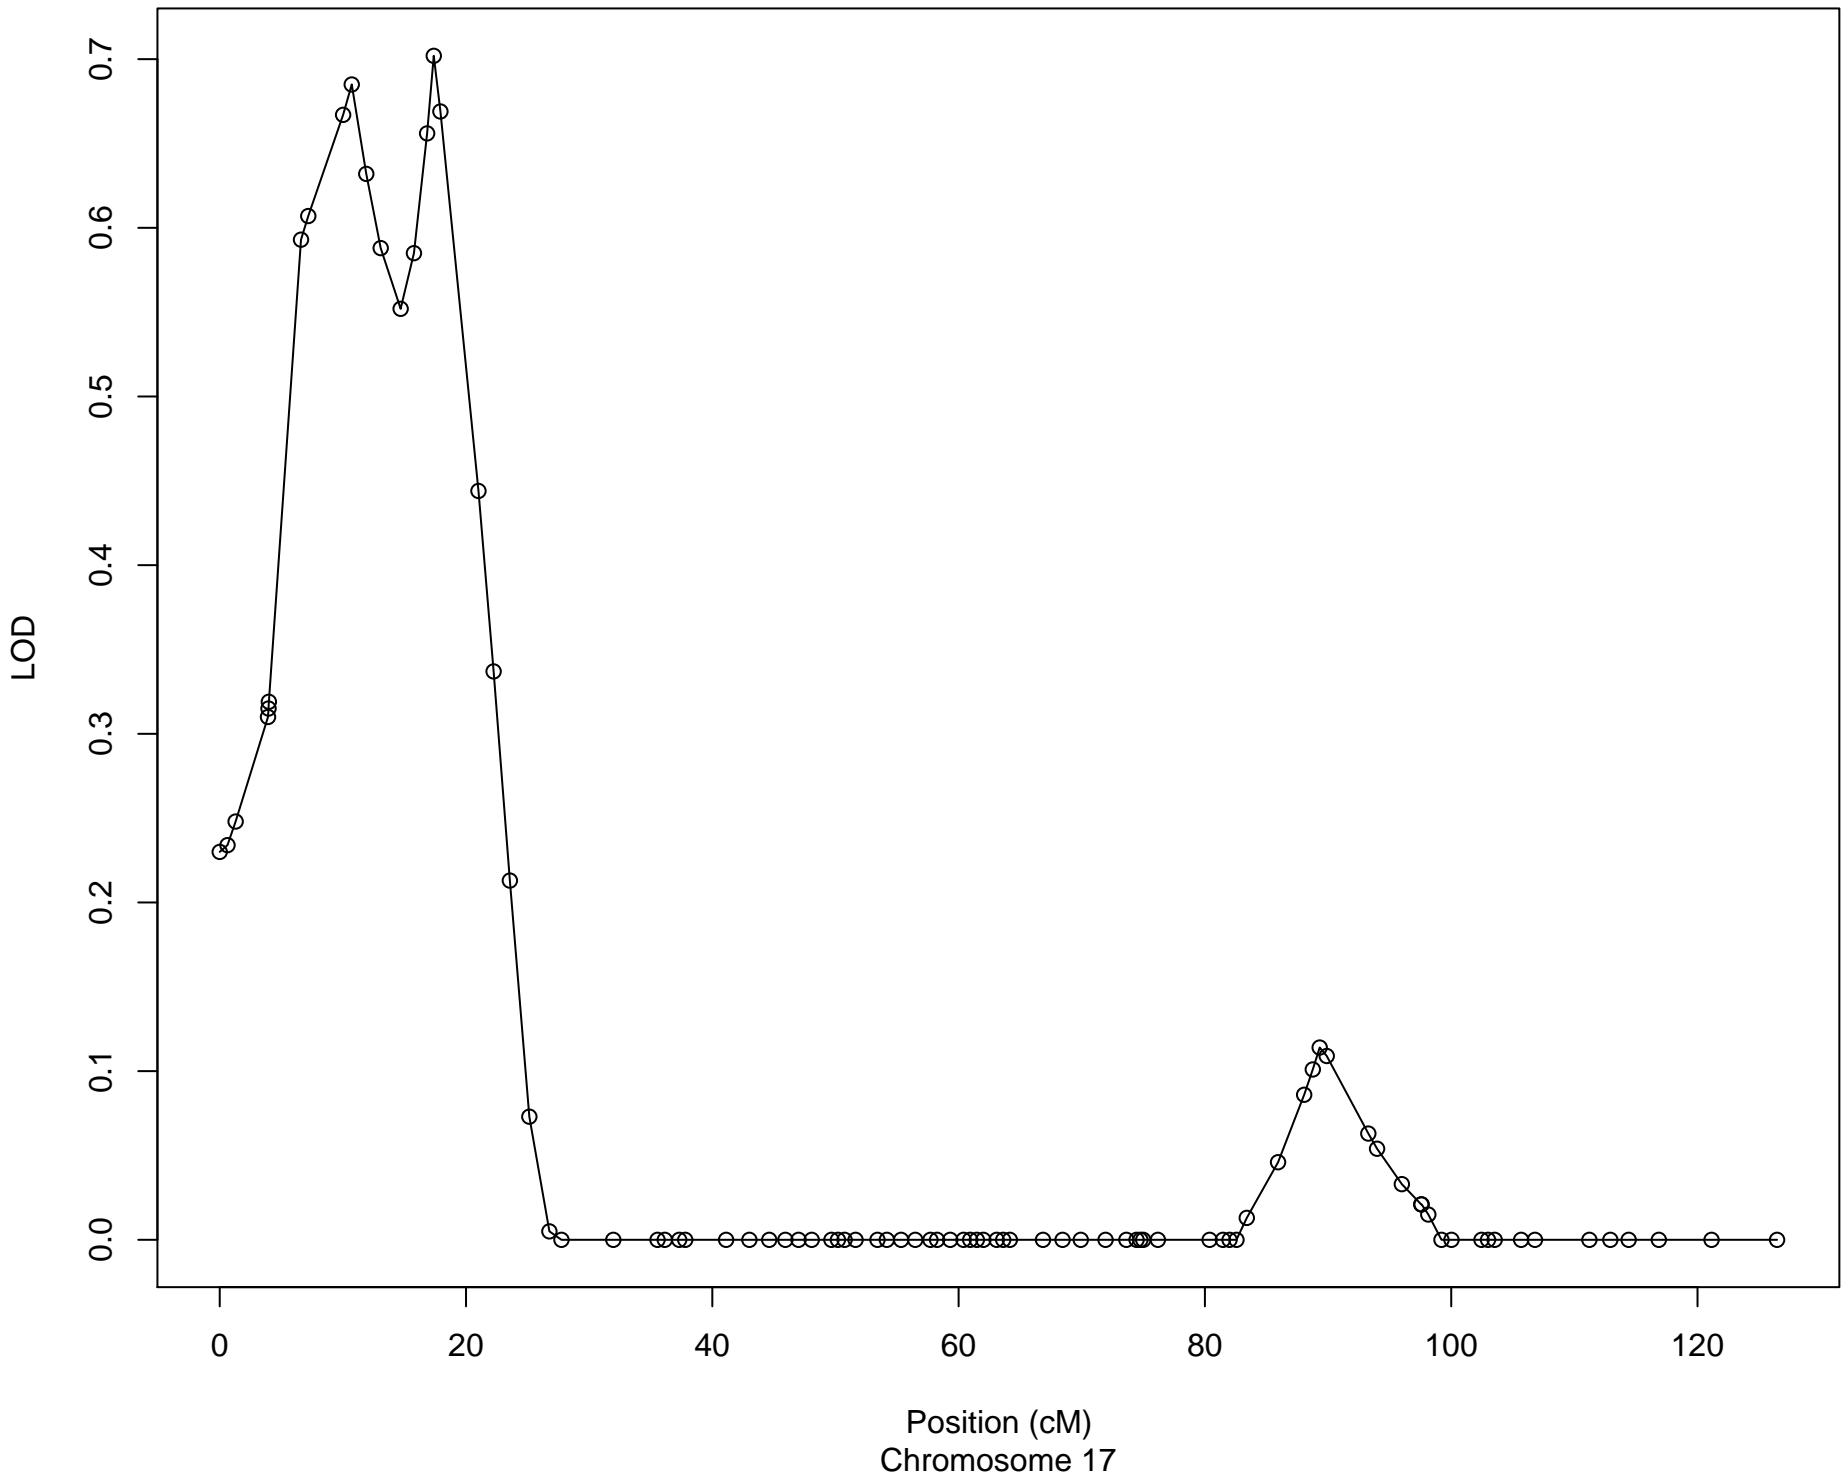

# IC50 (10-methoxy-camptothecin) (IC50\_mCPT)

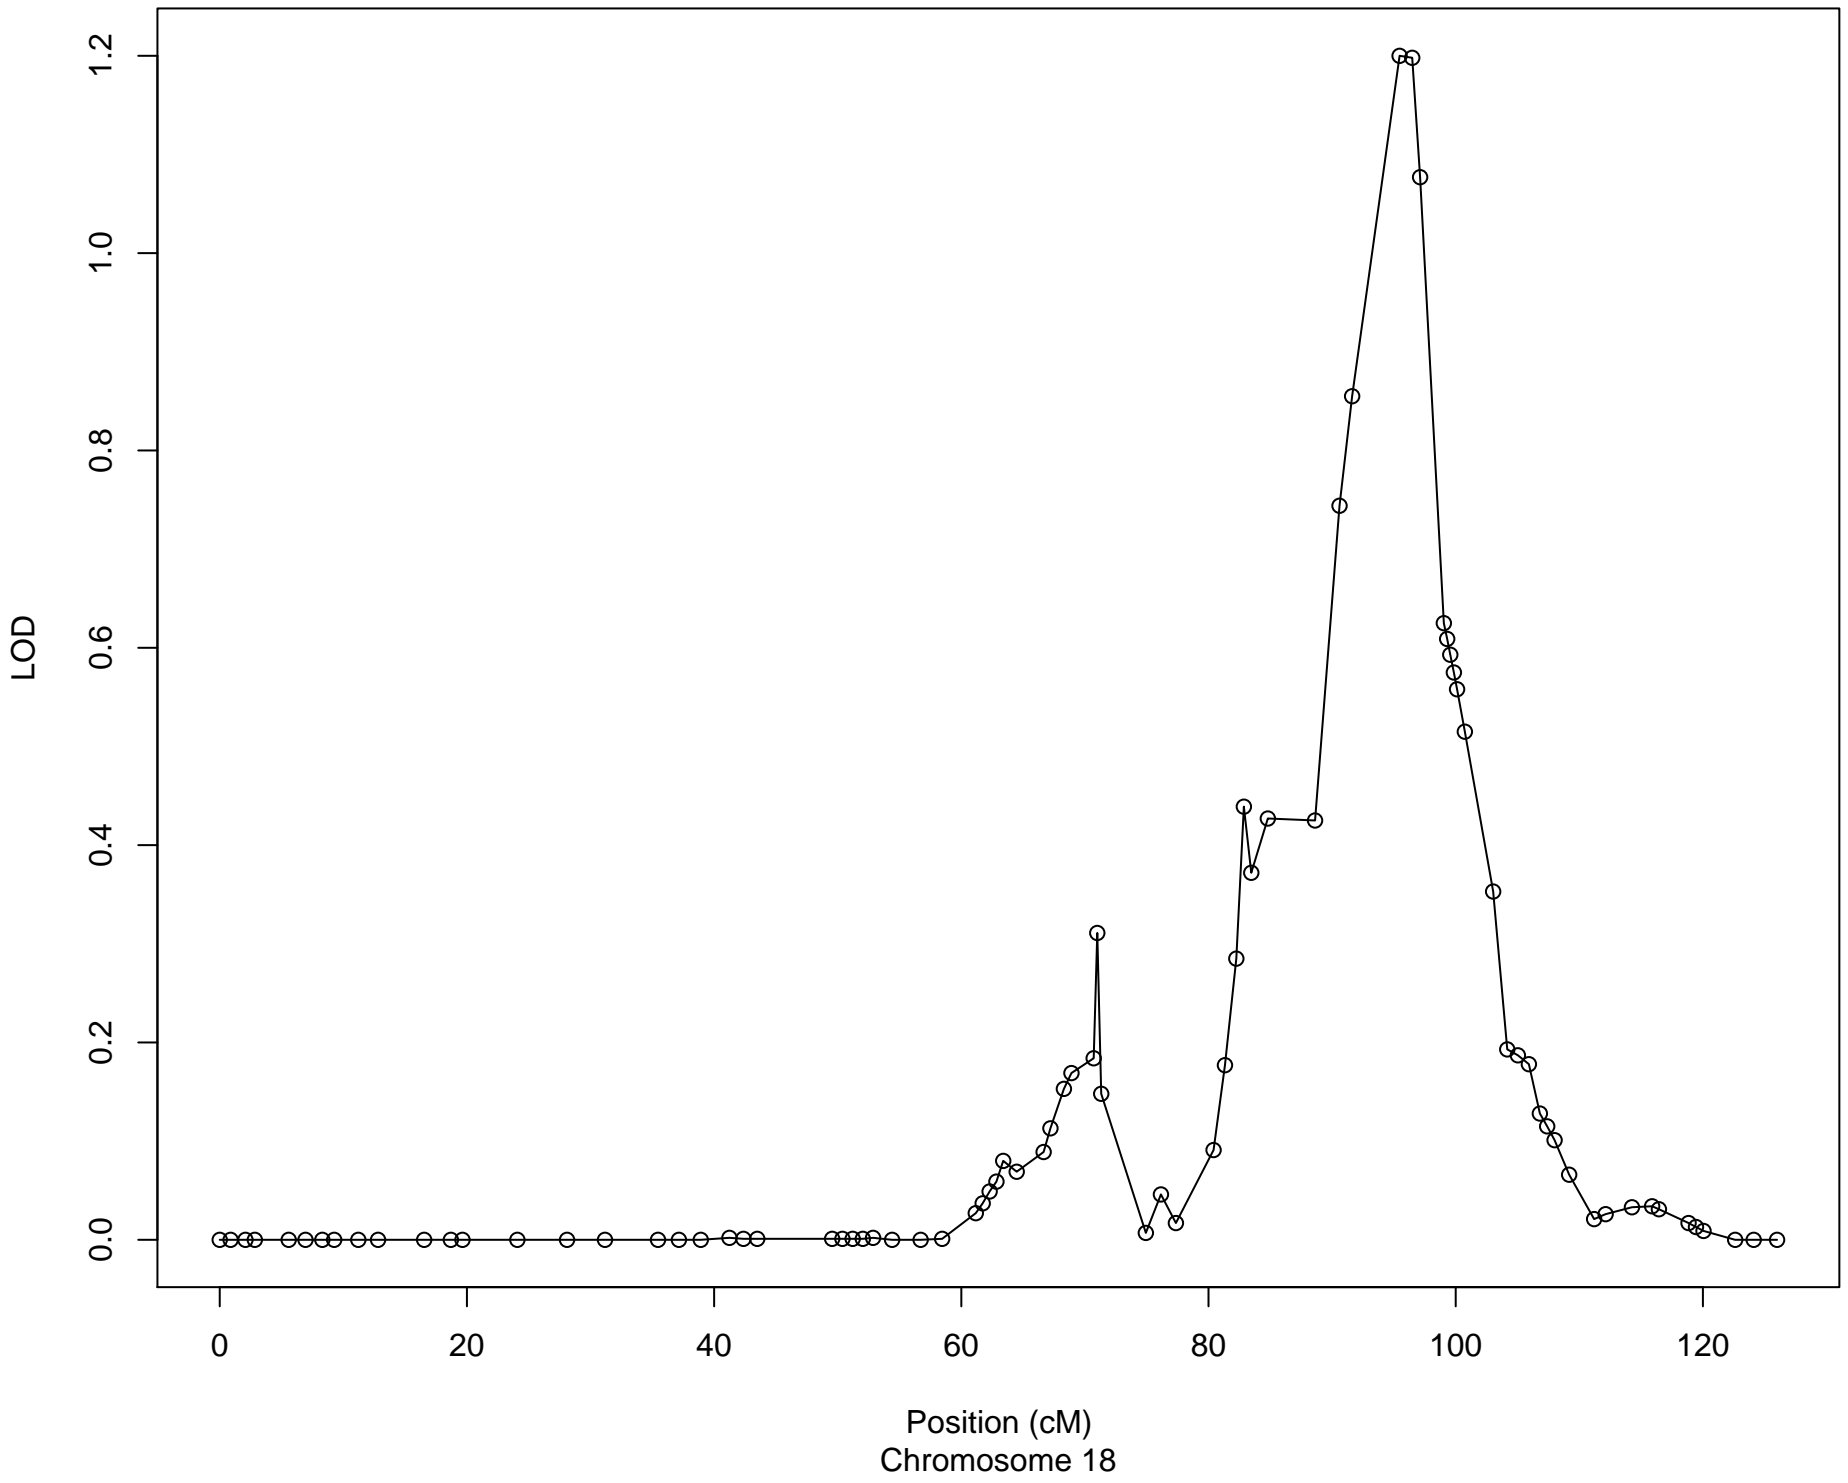

# IC50 (10-methoxy-camptothecin) (IC50\_mCPT)

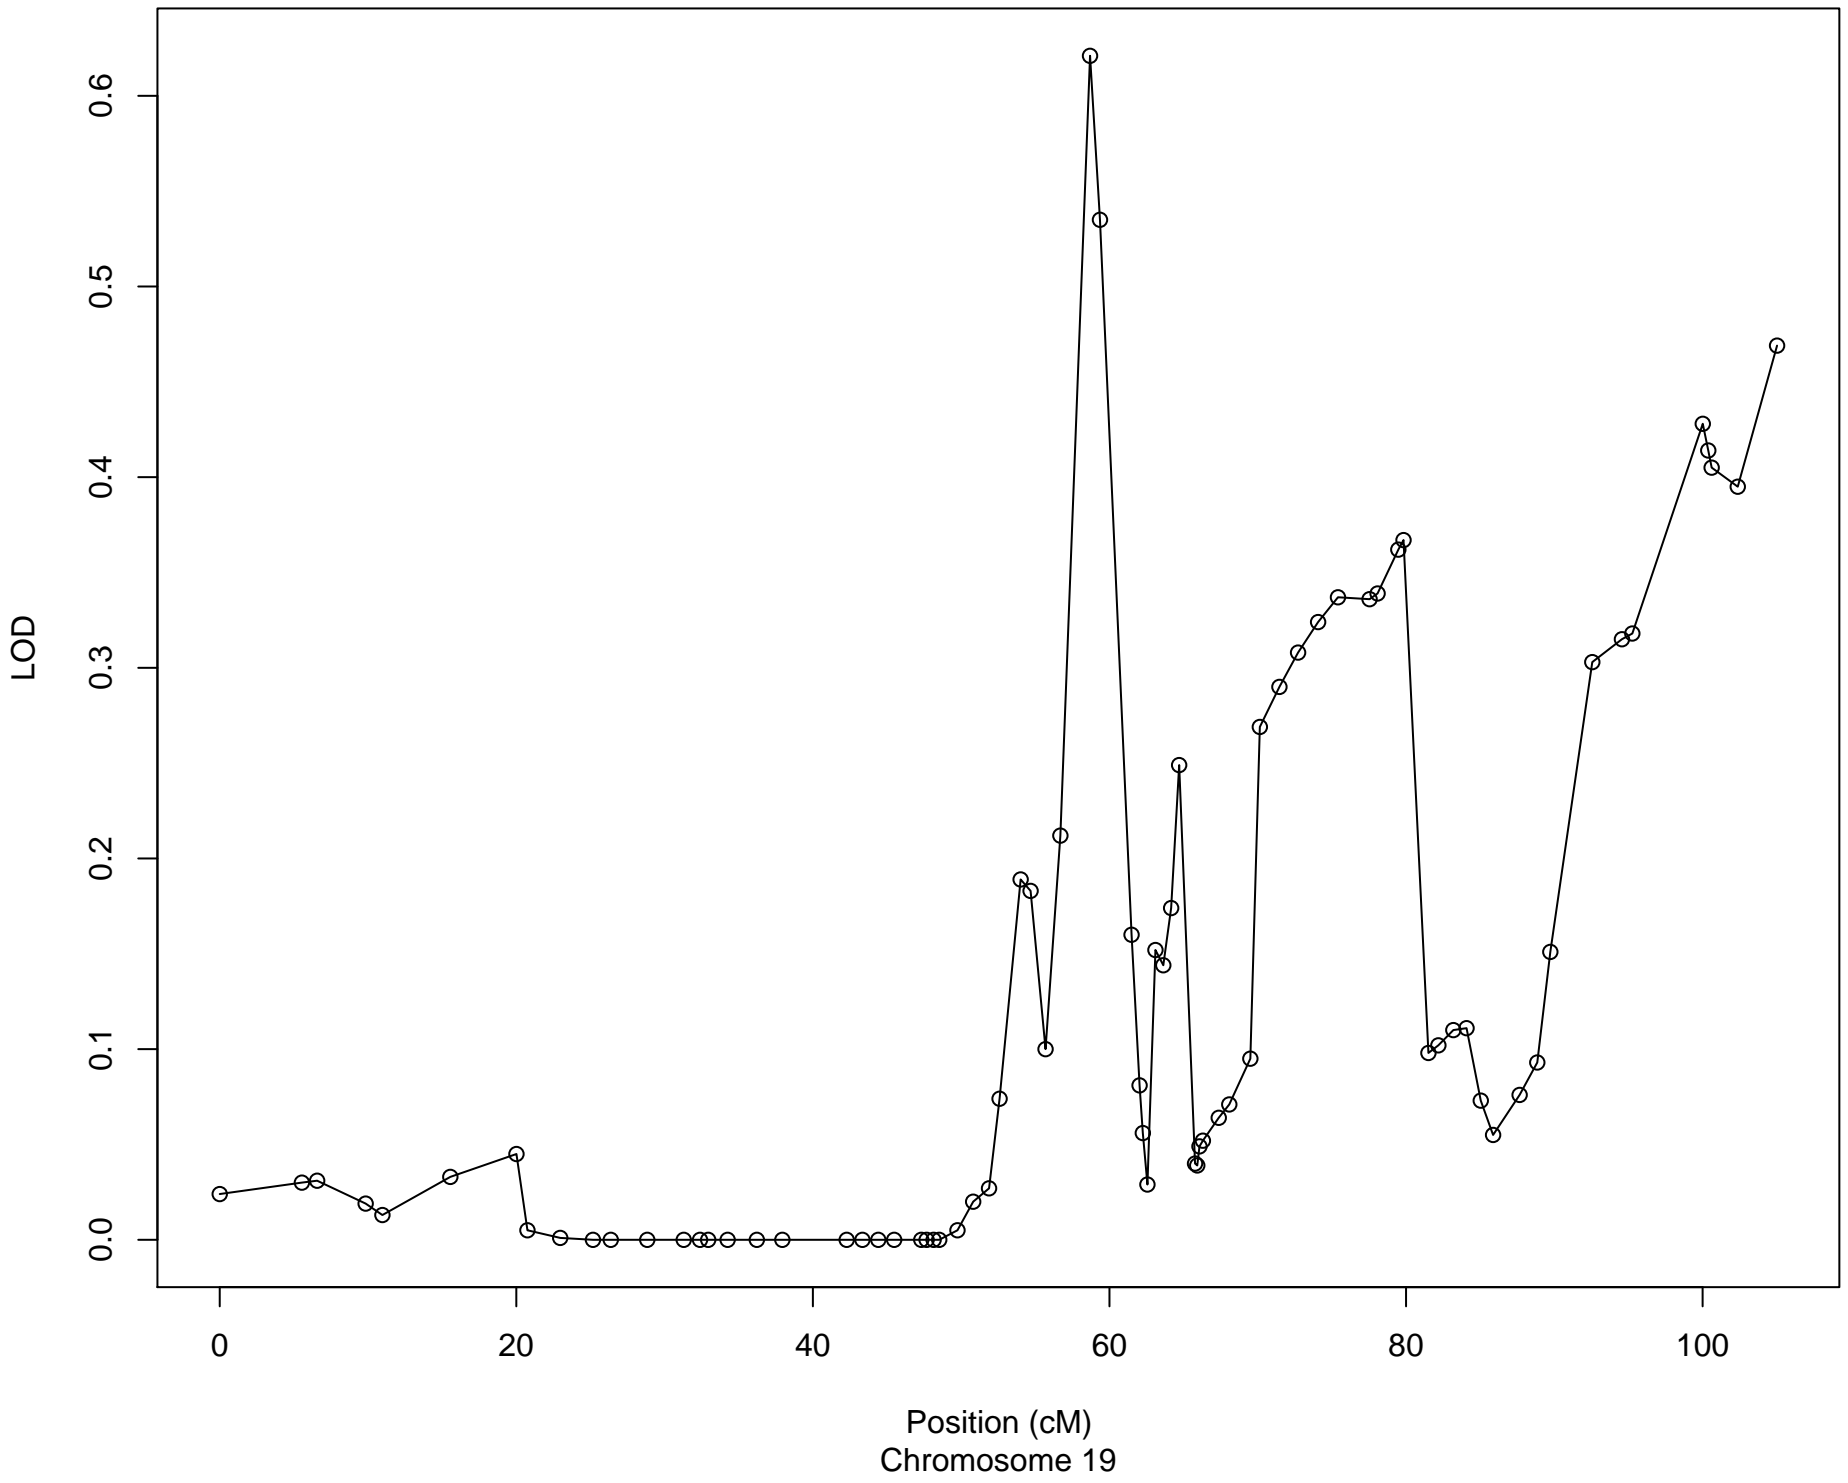

# IC50 (10-methoxy-camptothecin) (IC50\_mCPT)

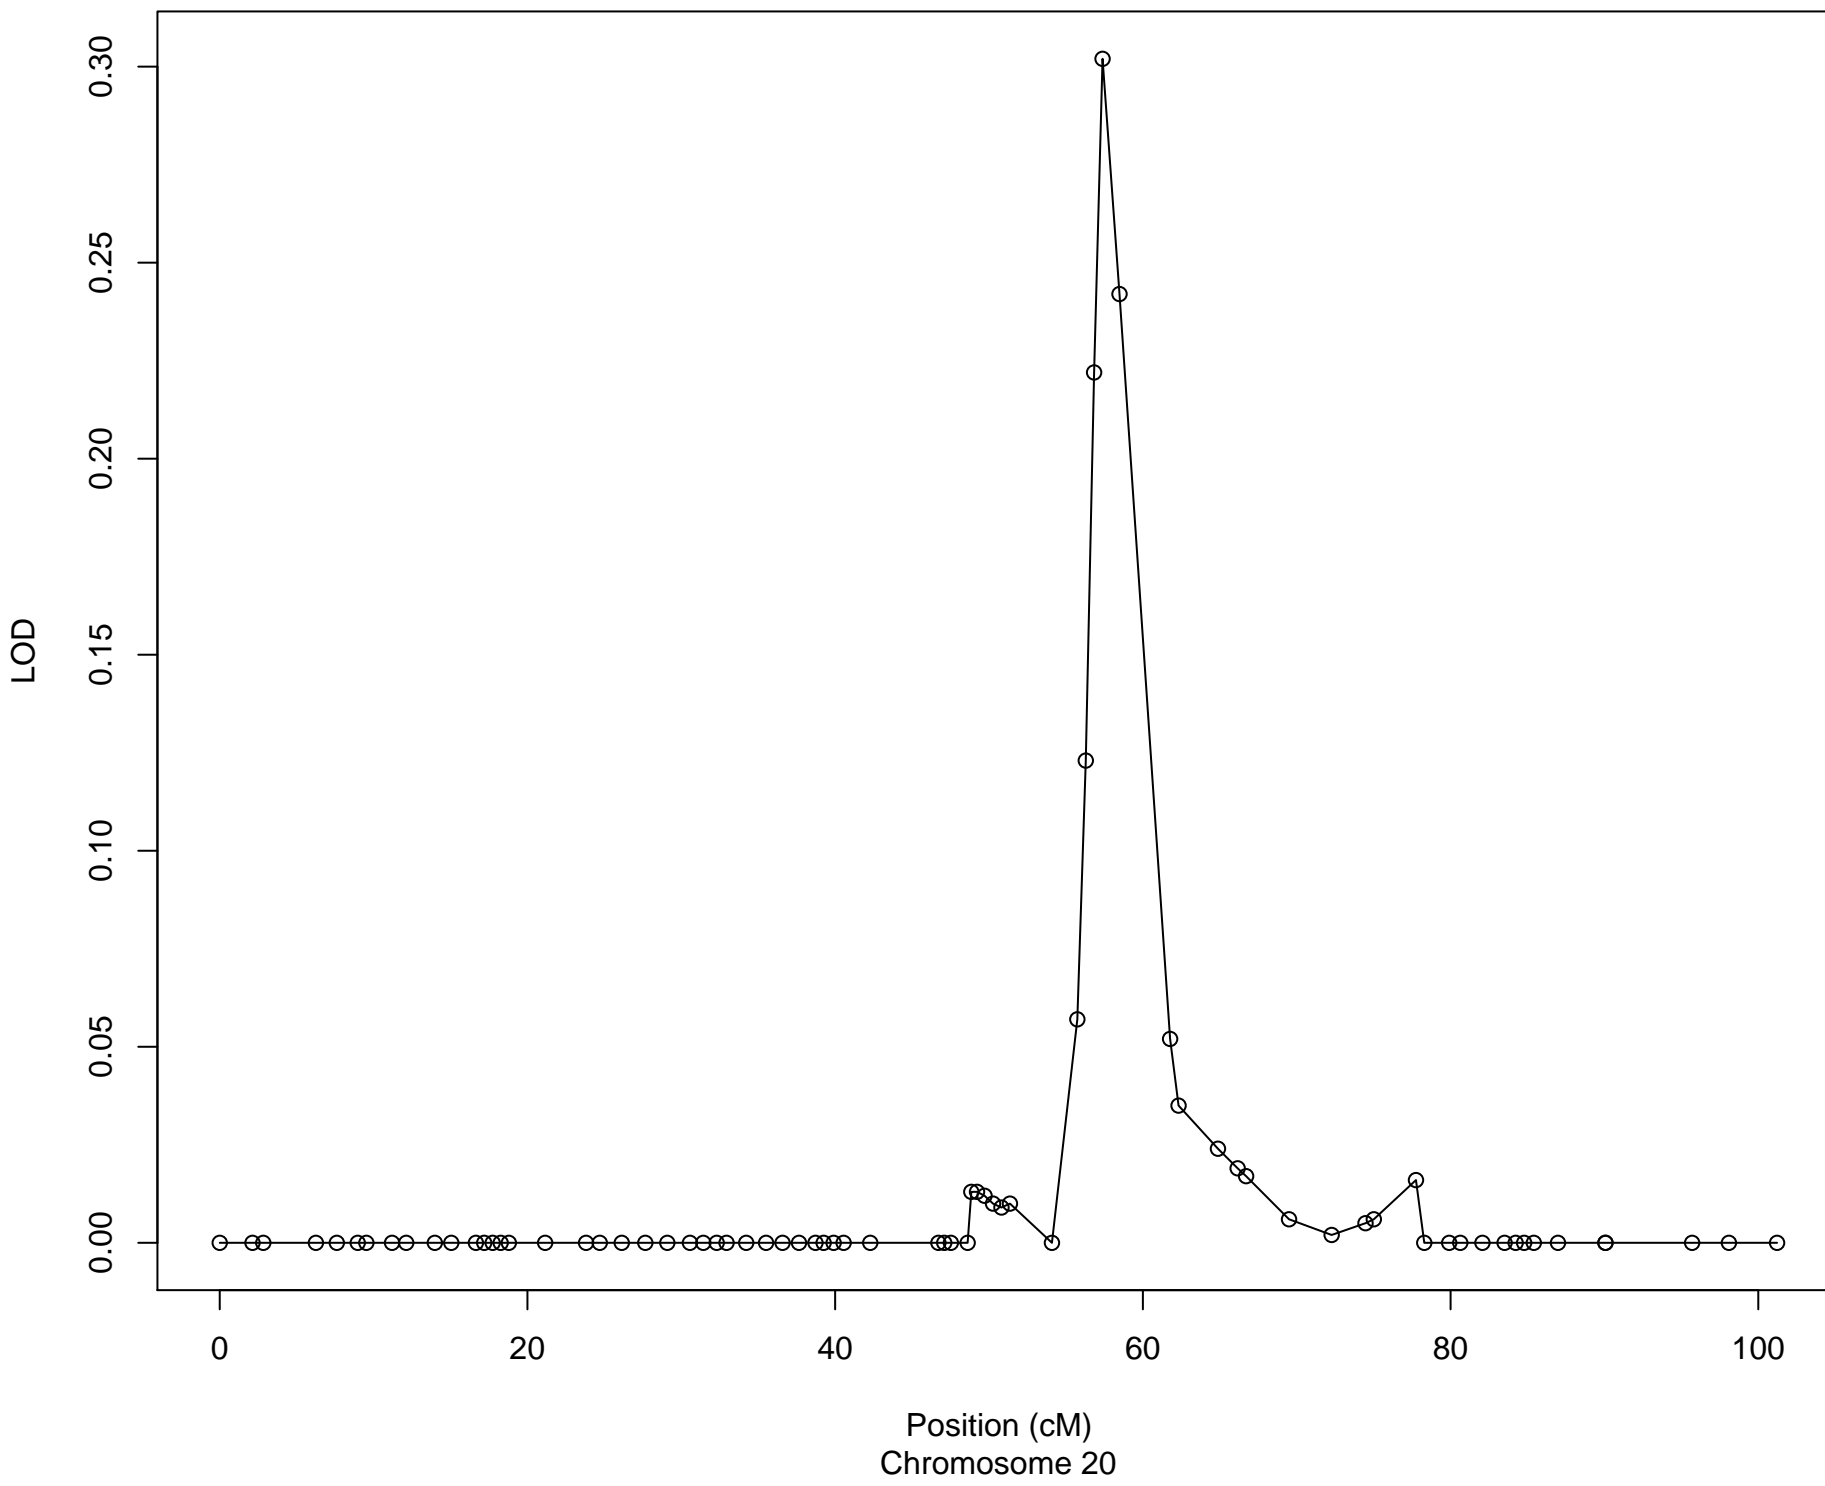

# IC50 (10-methoxy-camptothecin) (IC50\_mCPT)

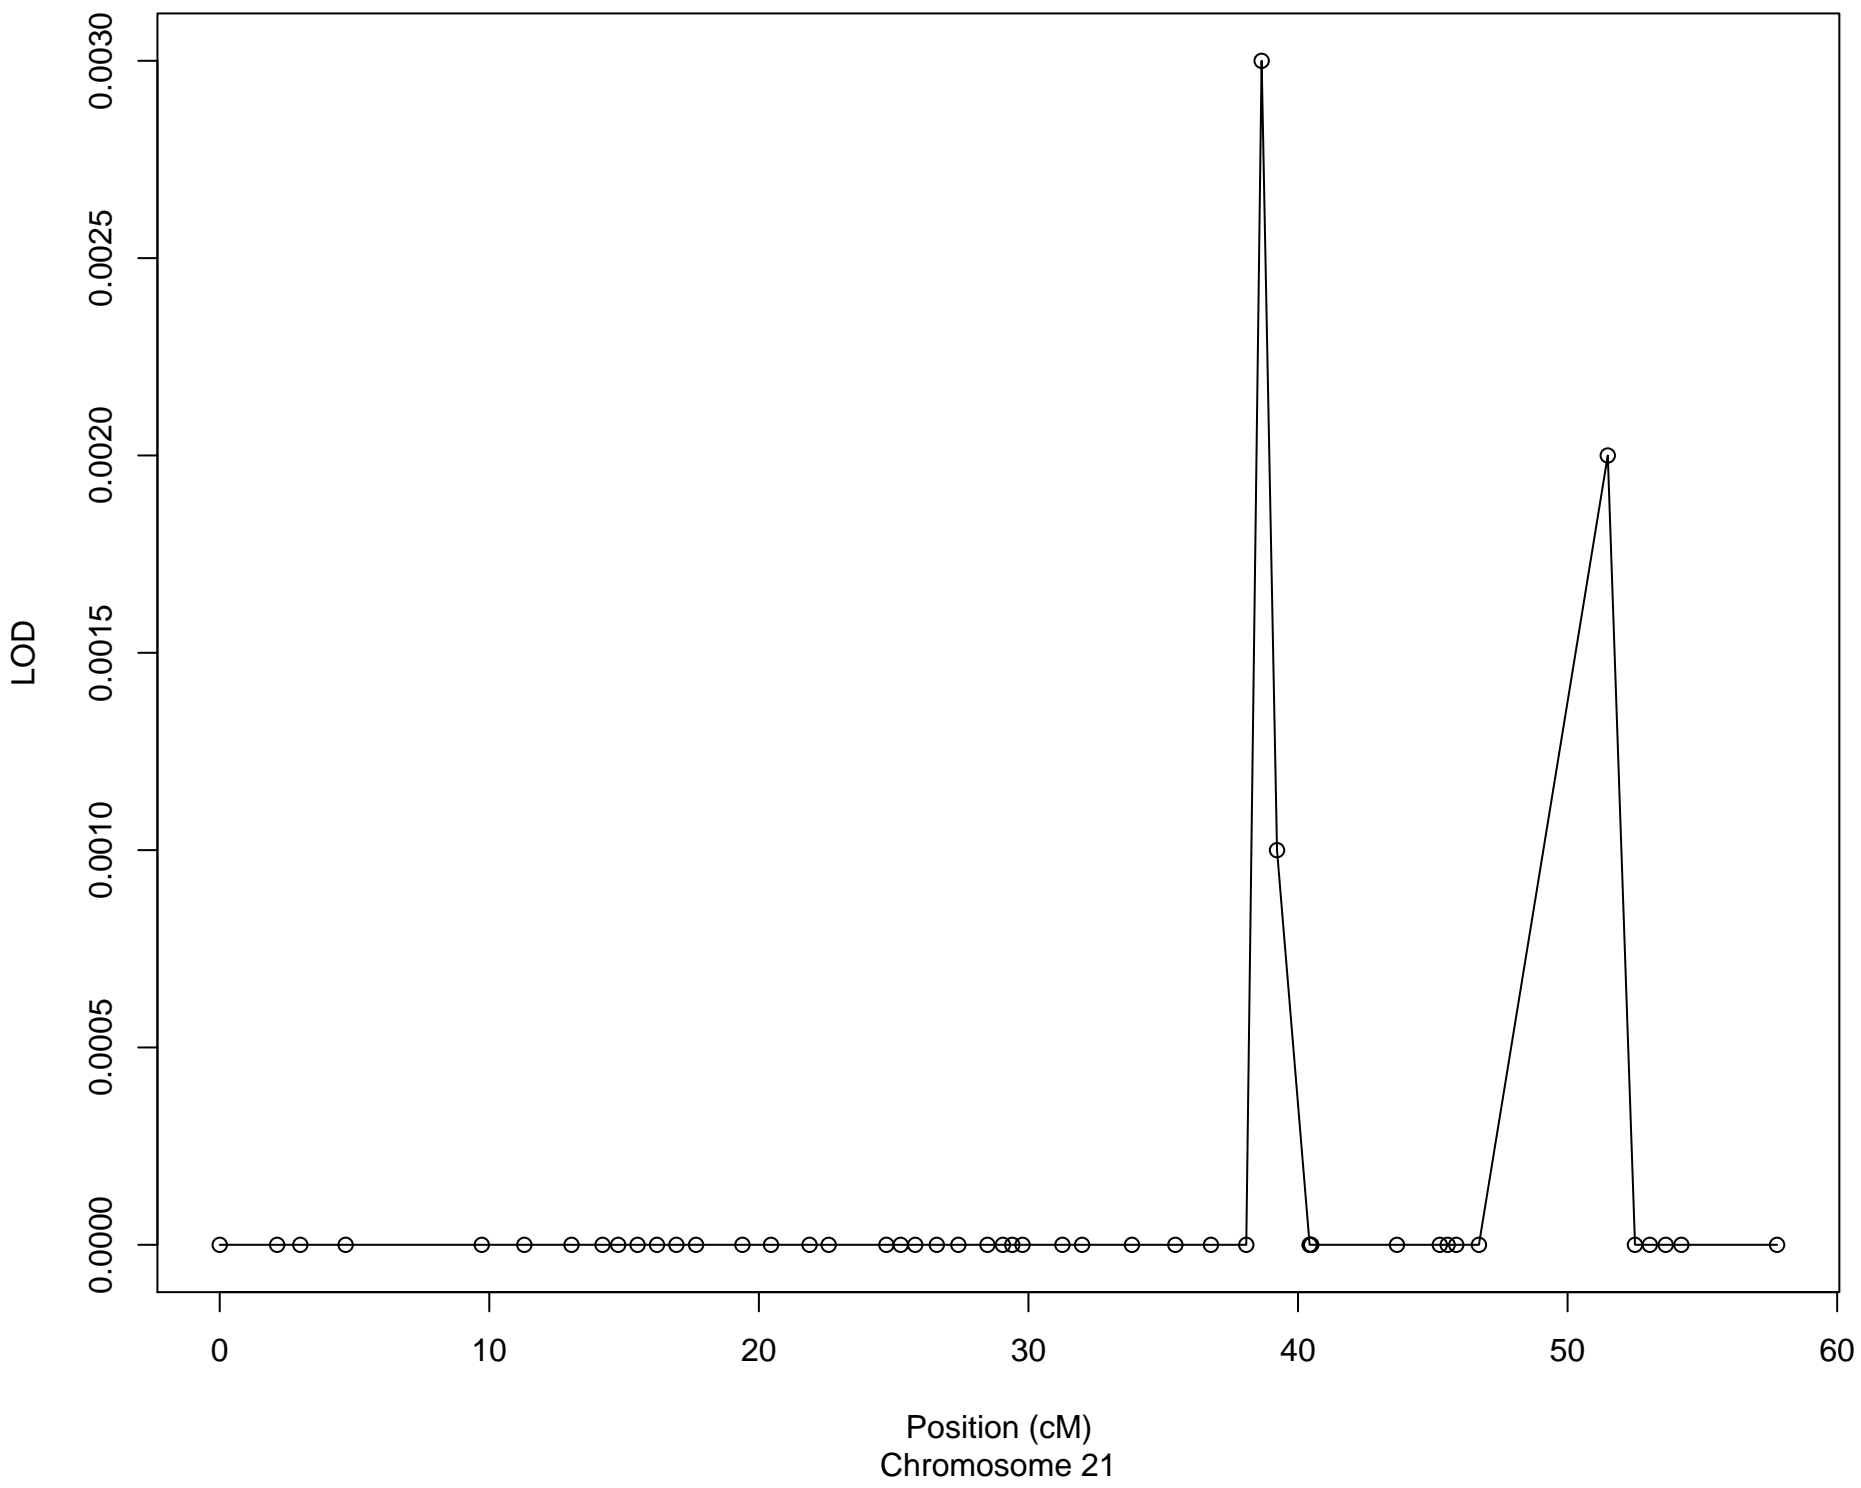

# IC50 (10-methoxy-camptothecin) (IC50\_mCPT)

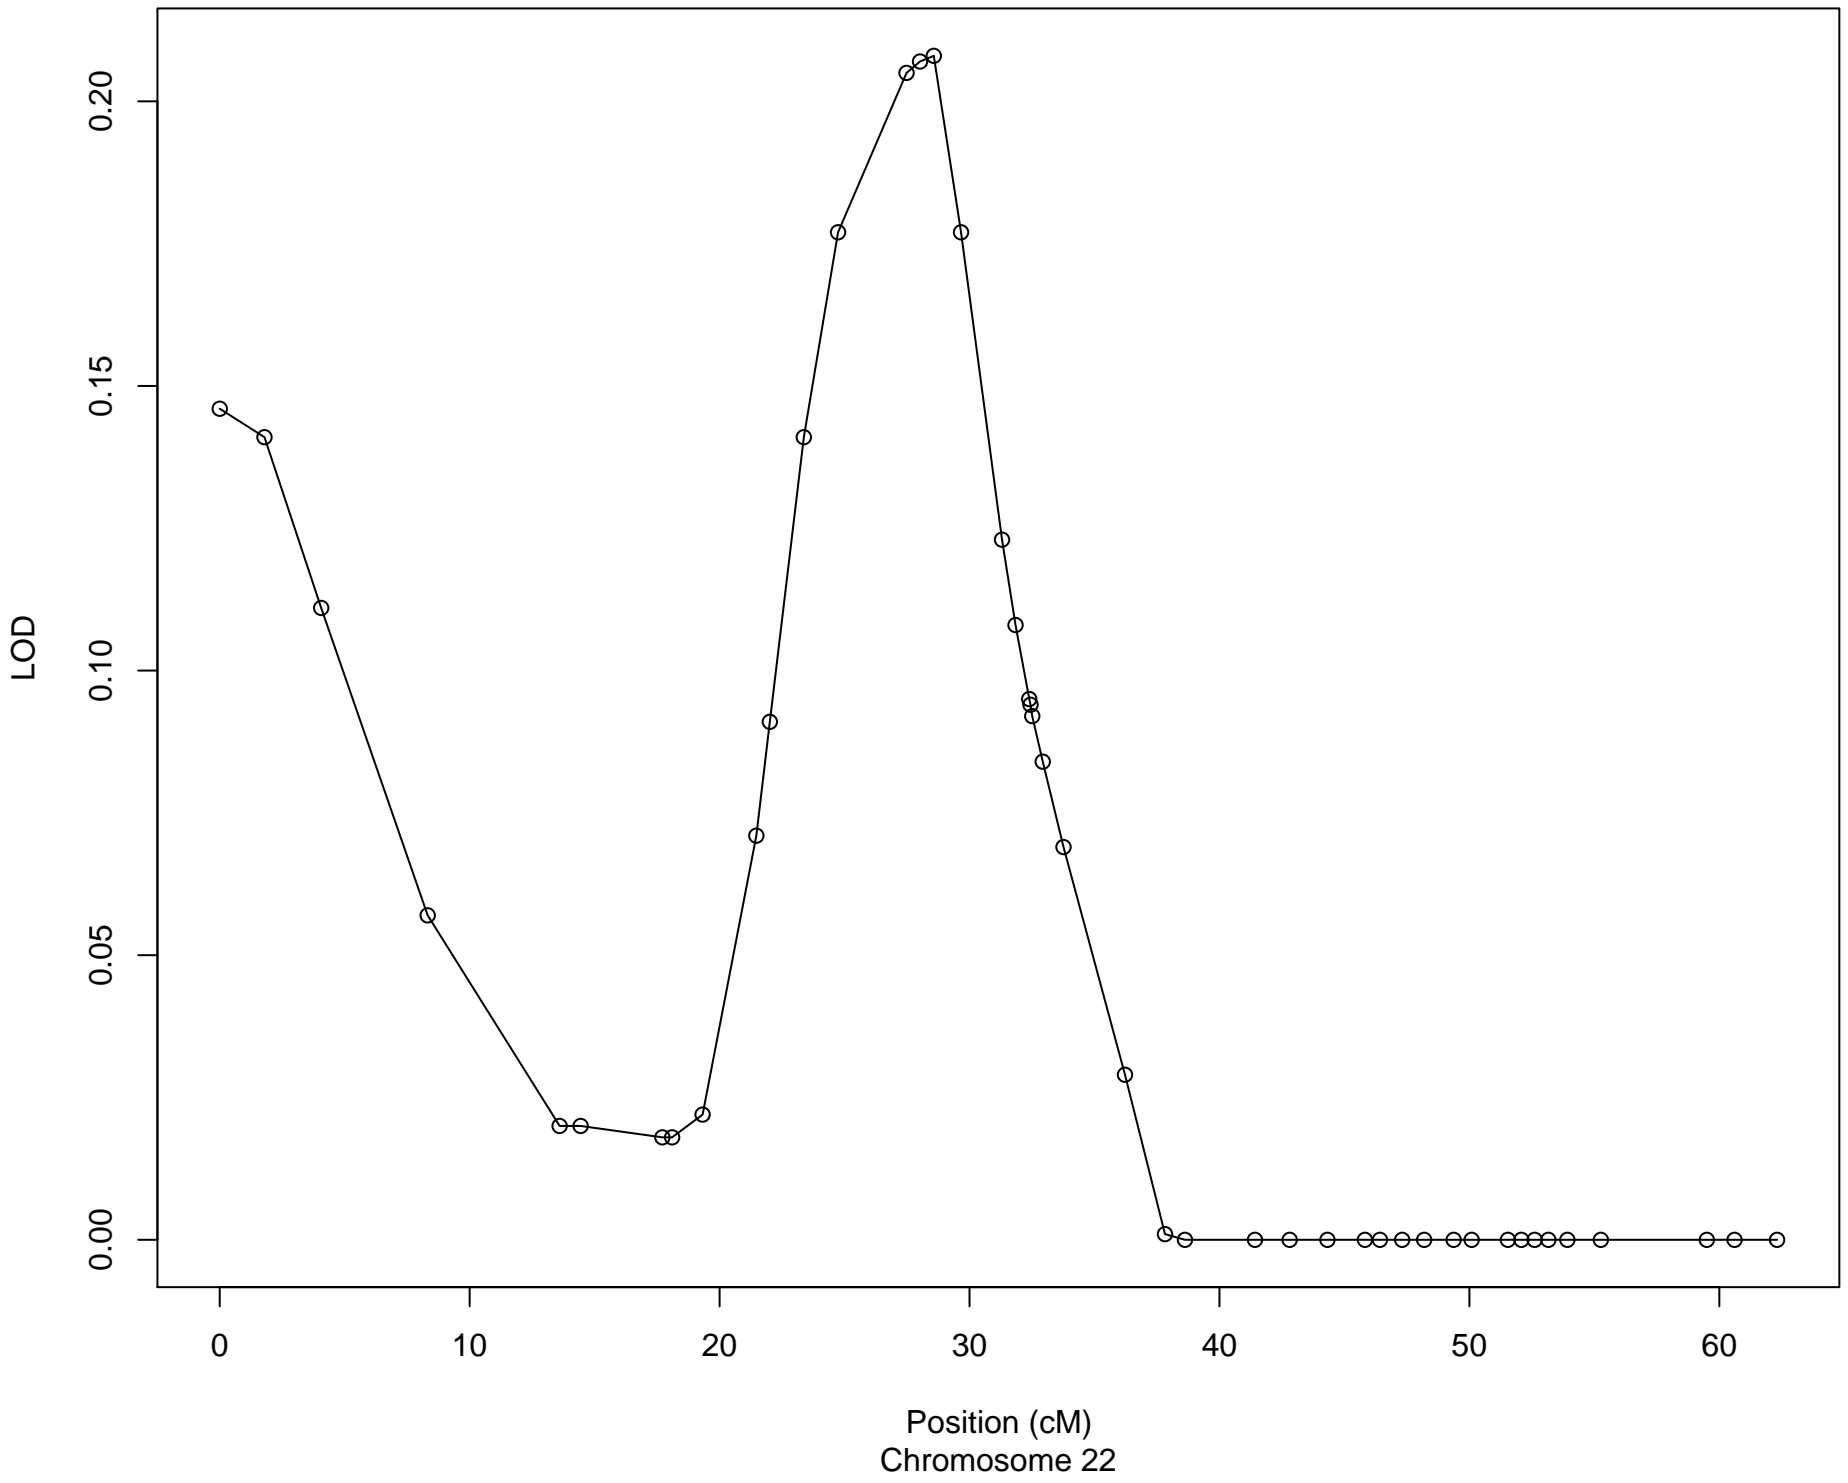

# 10-methoxy-camptothecin (mCPT)

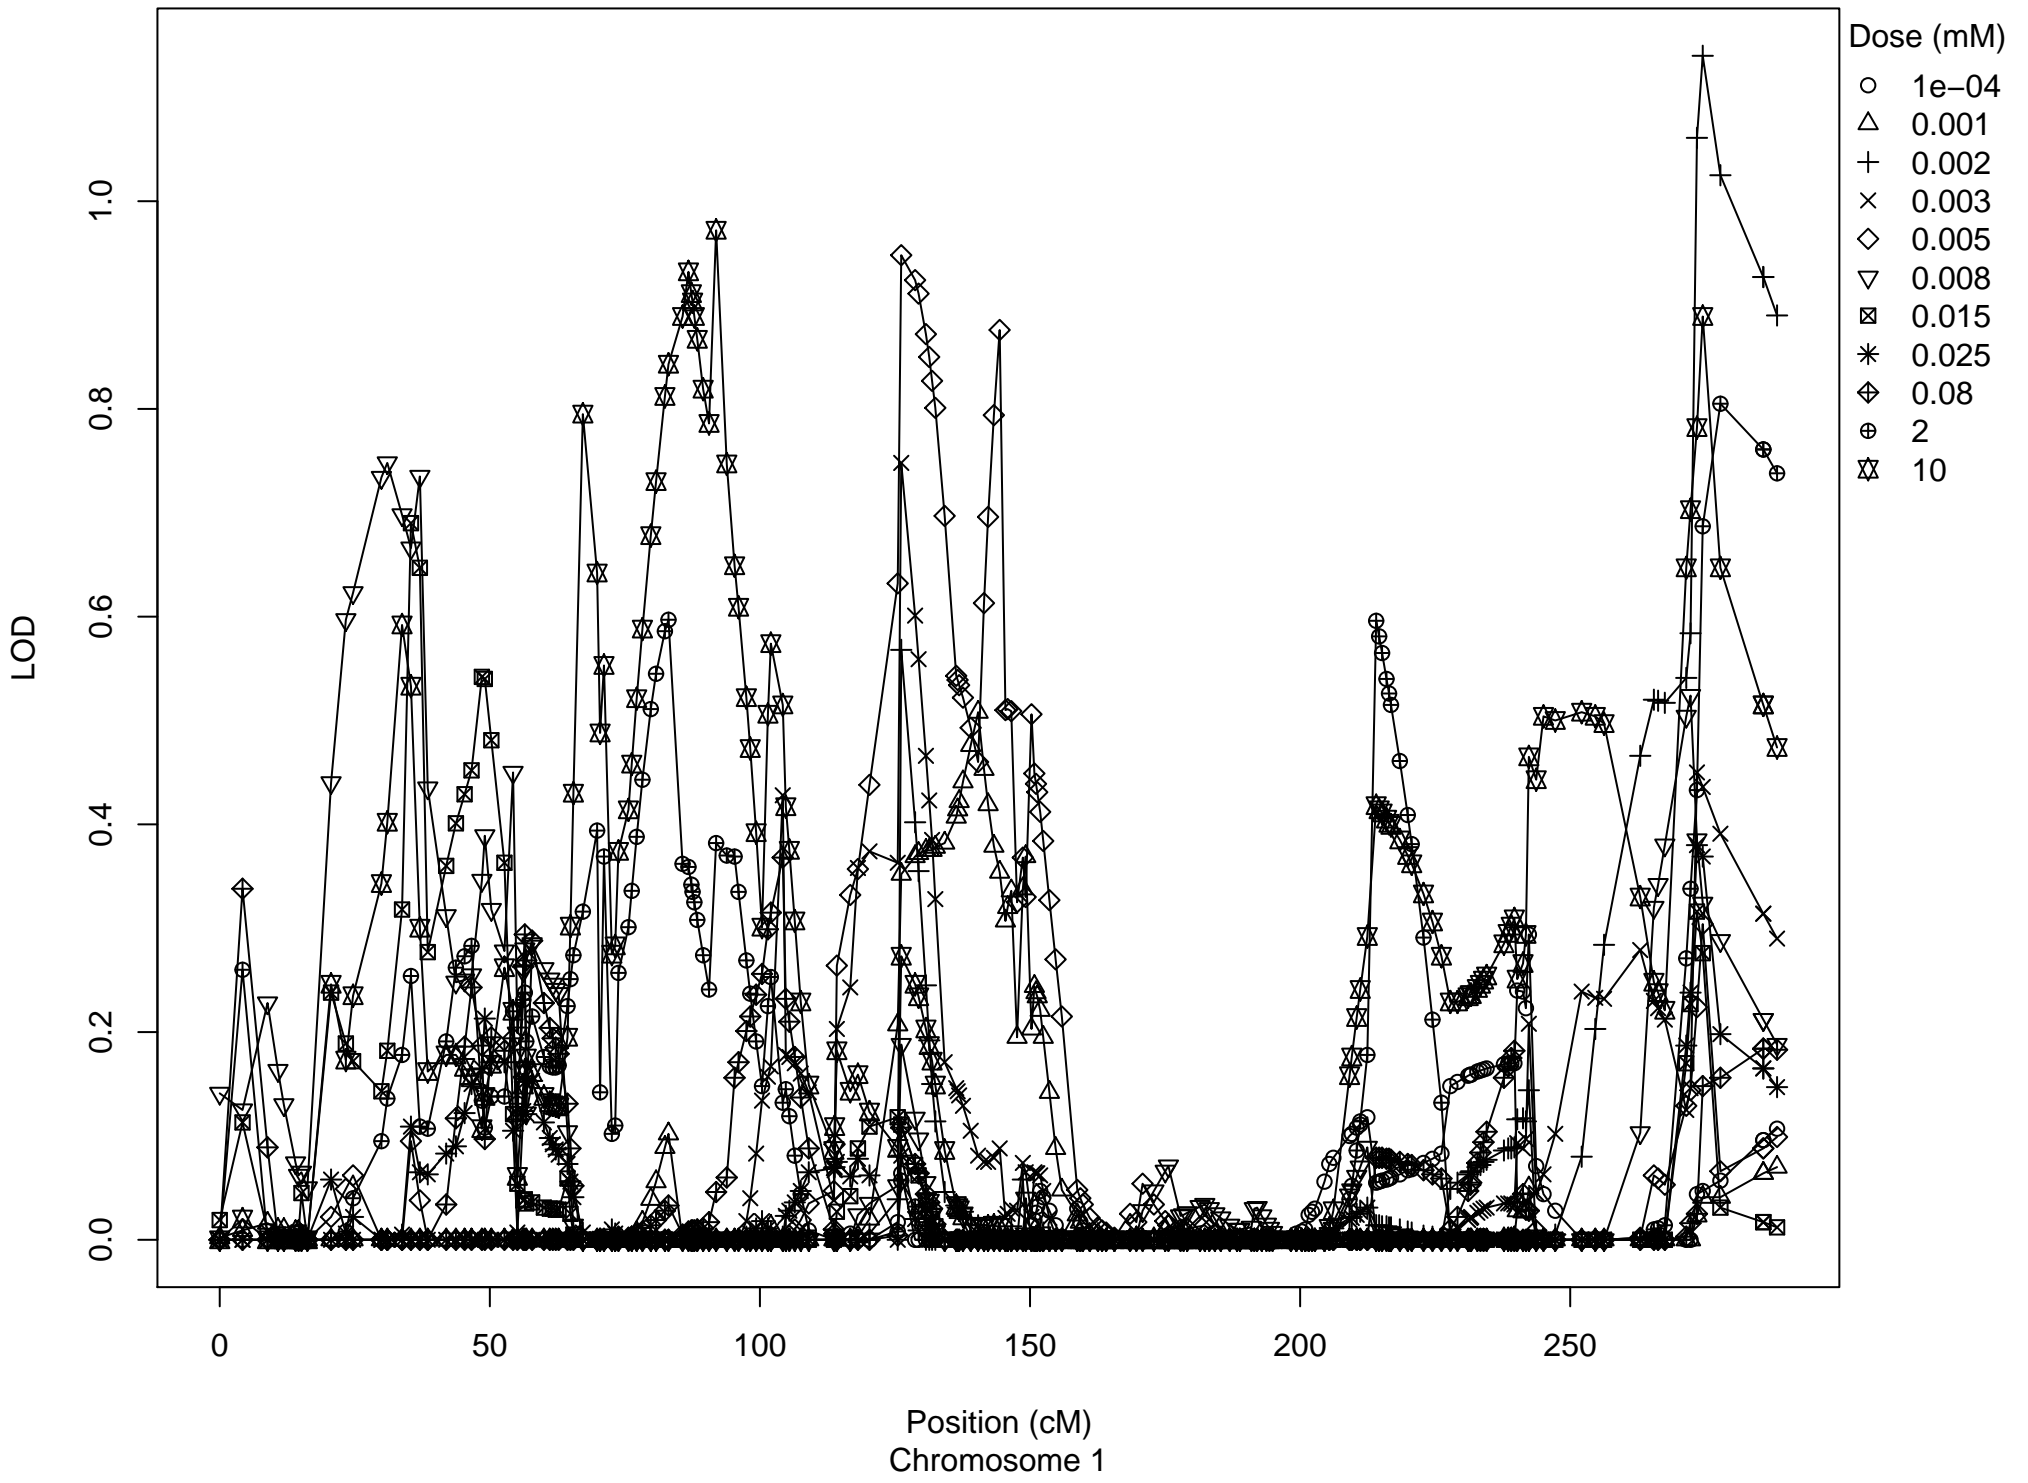

# 10-methoxy-camptothecin (mCPT)

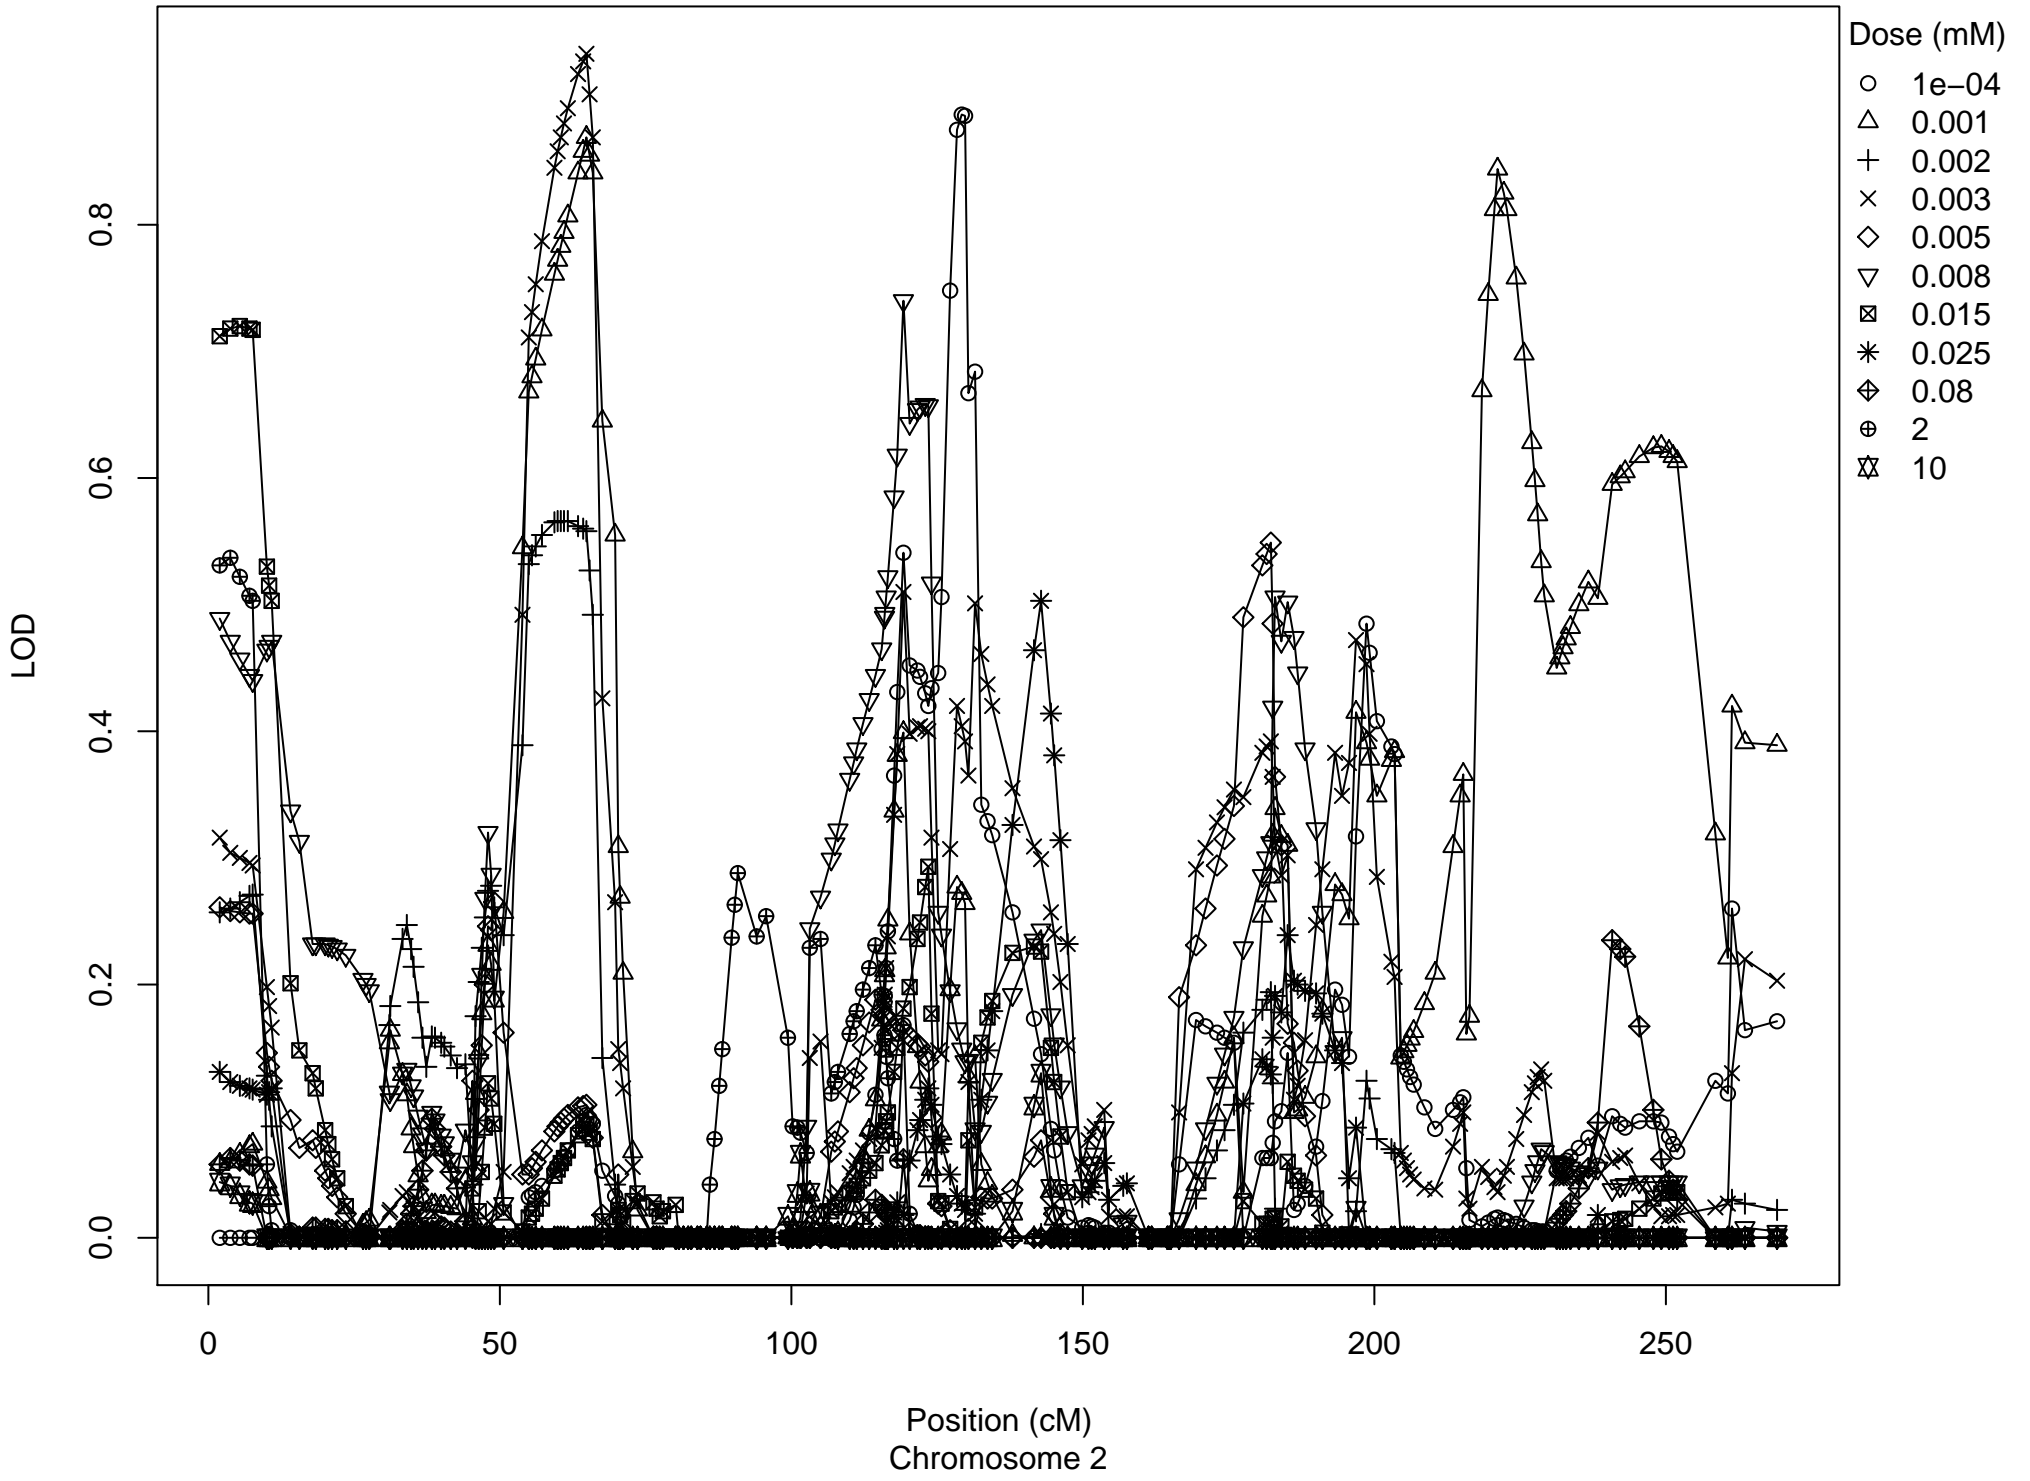



# 10-methoxy-camptothecin (mCPT)

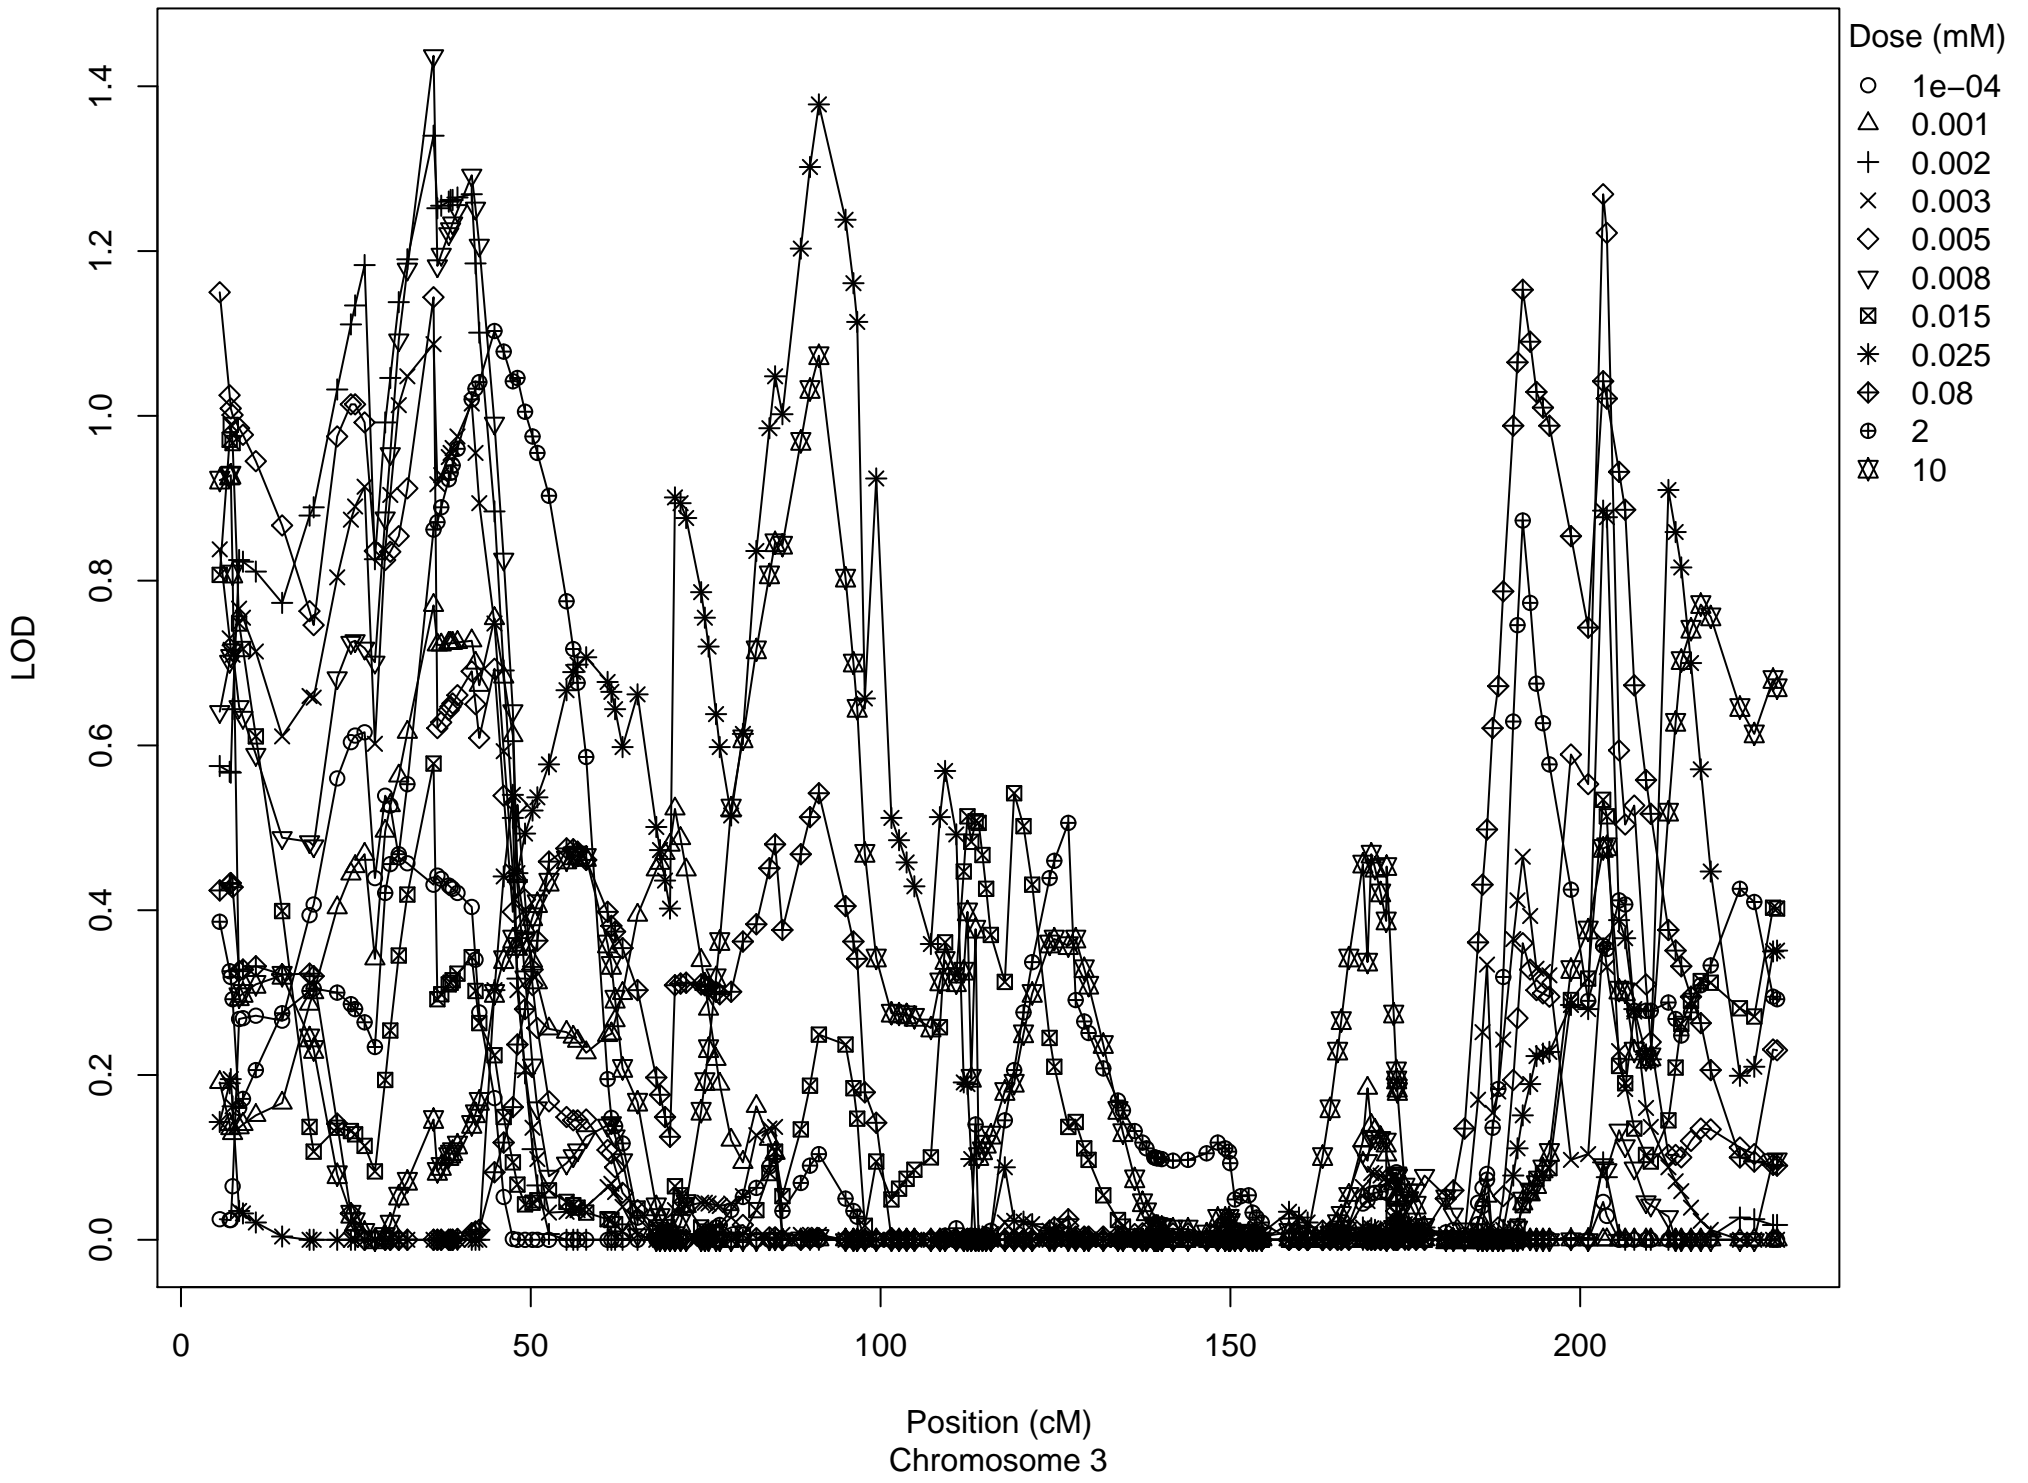

# 10-methoxy-camptothecin (mCPT)

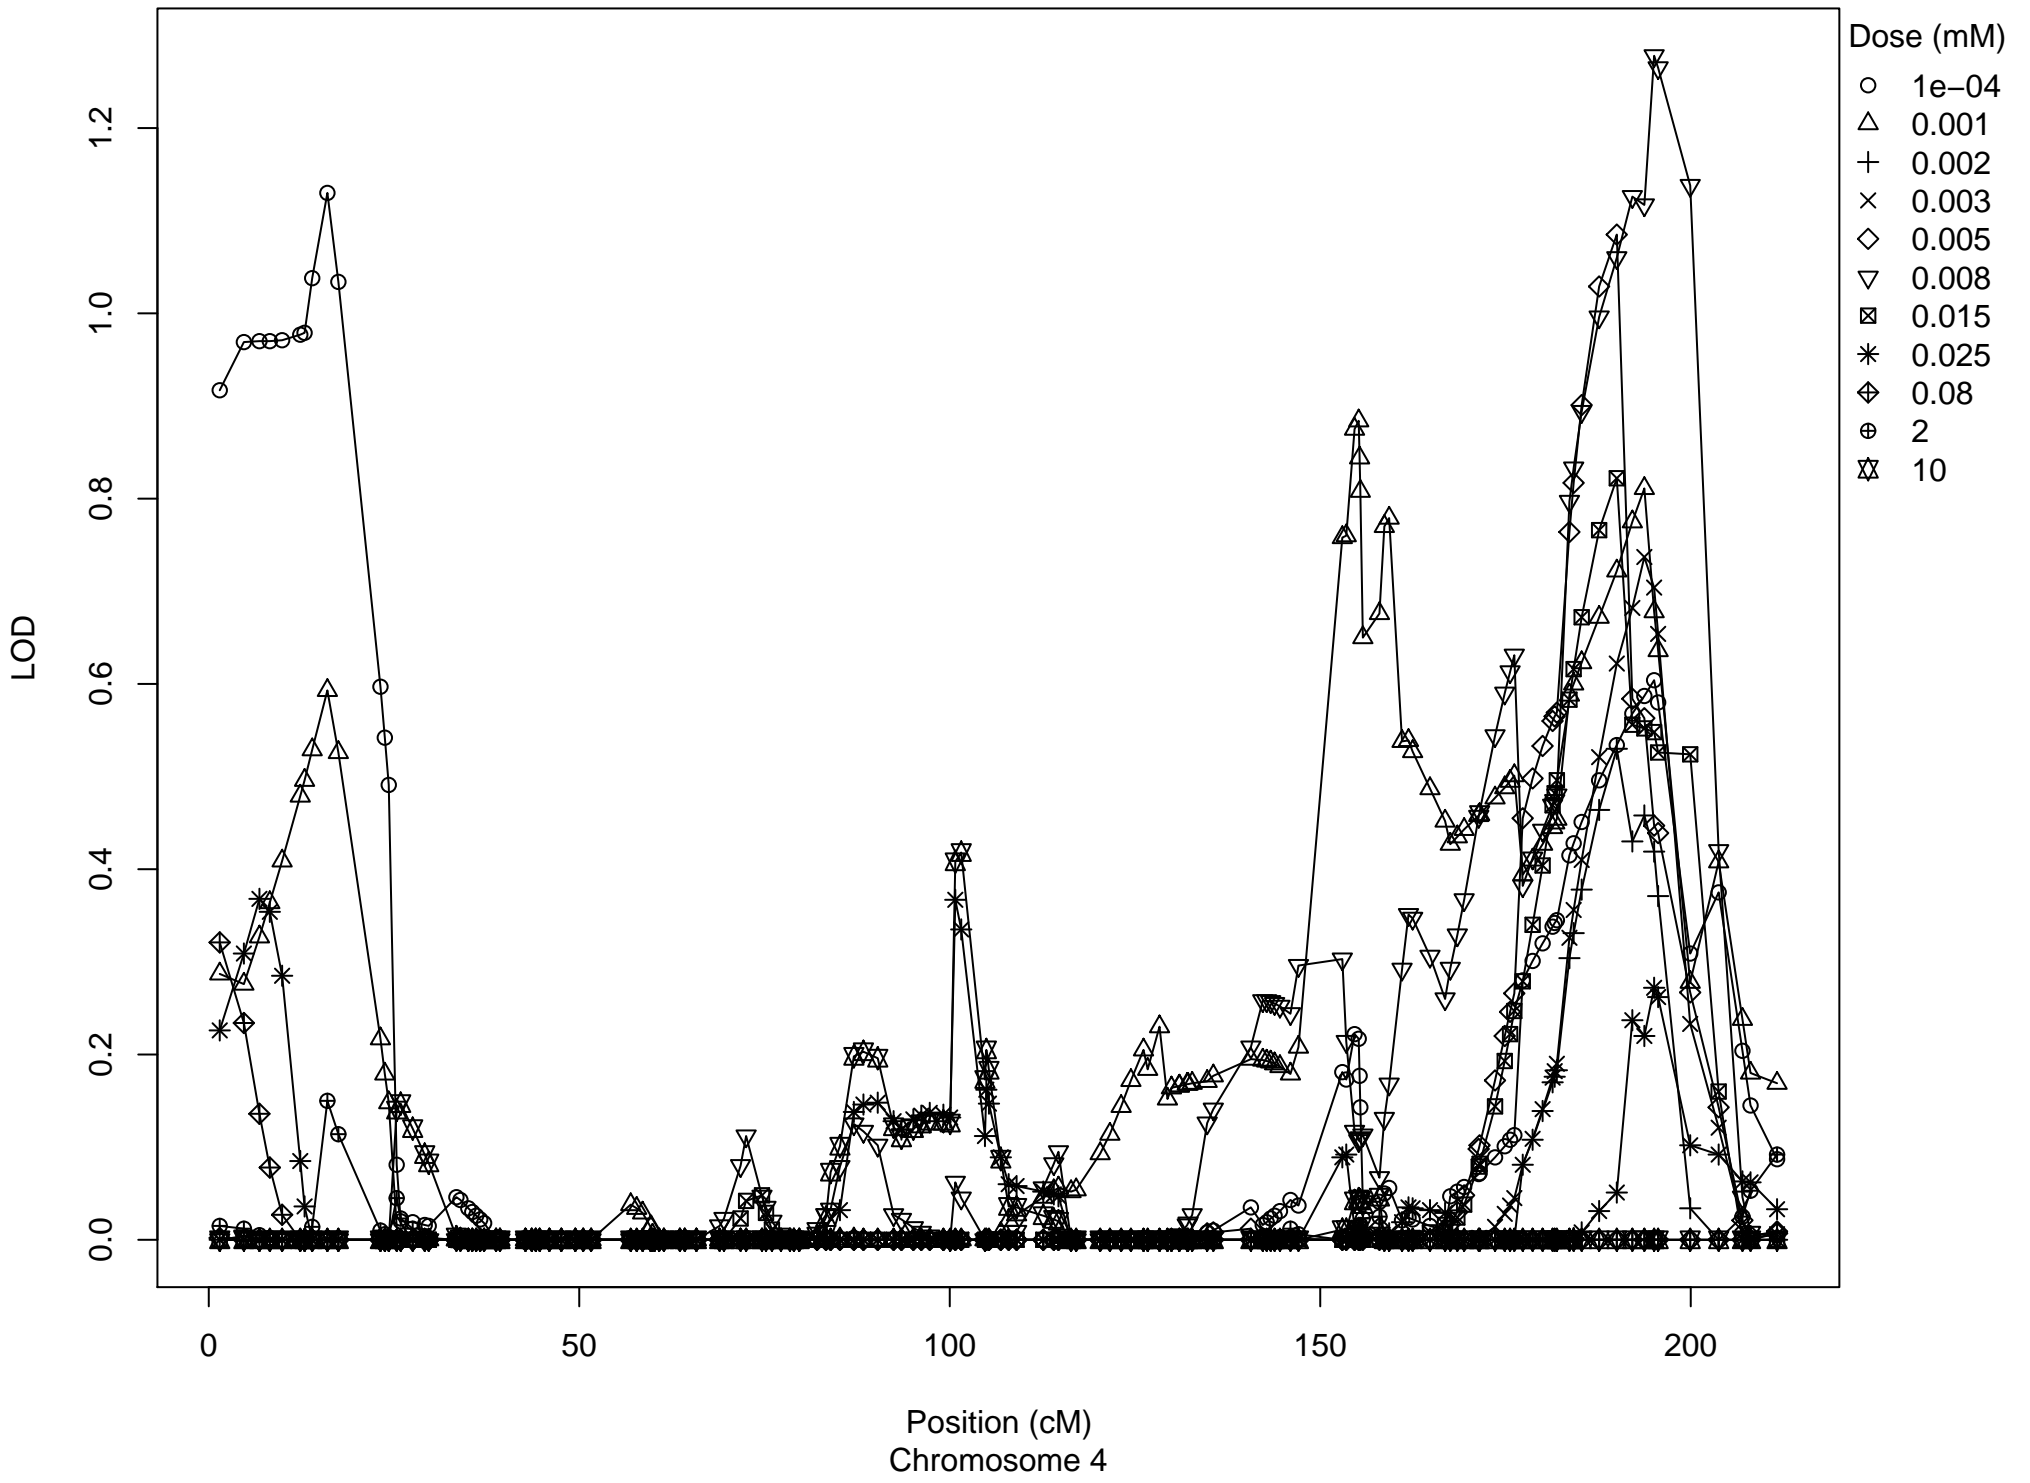

# 10-methoxy-camptothecin (mCPT)

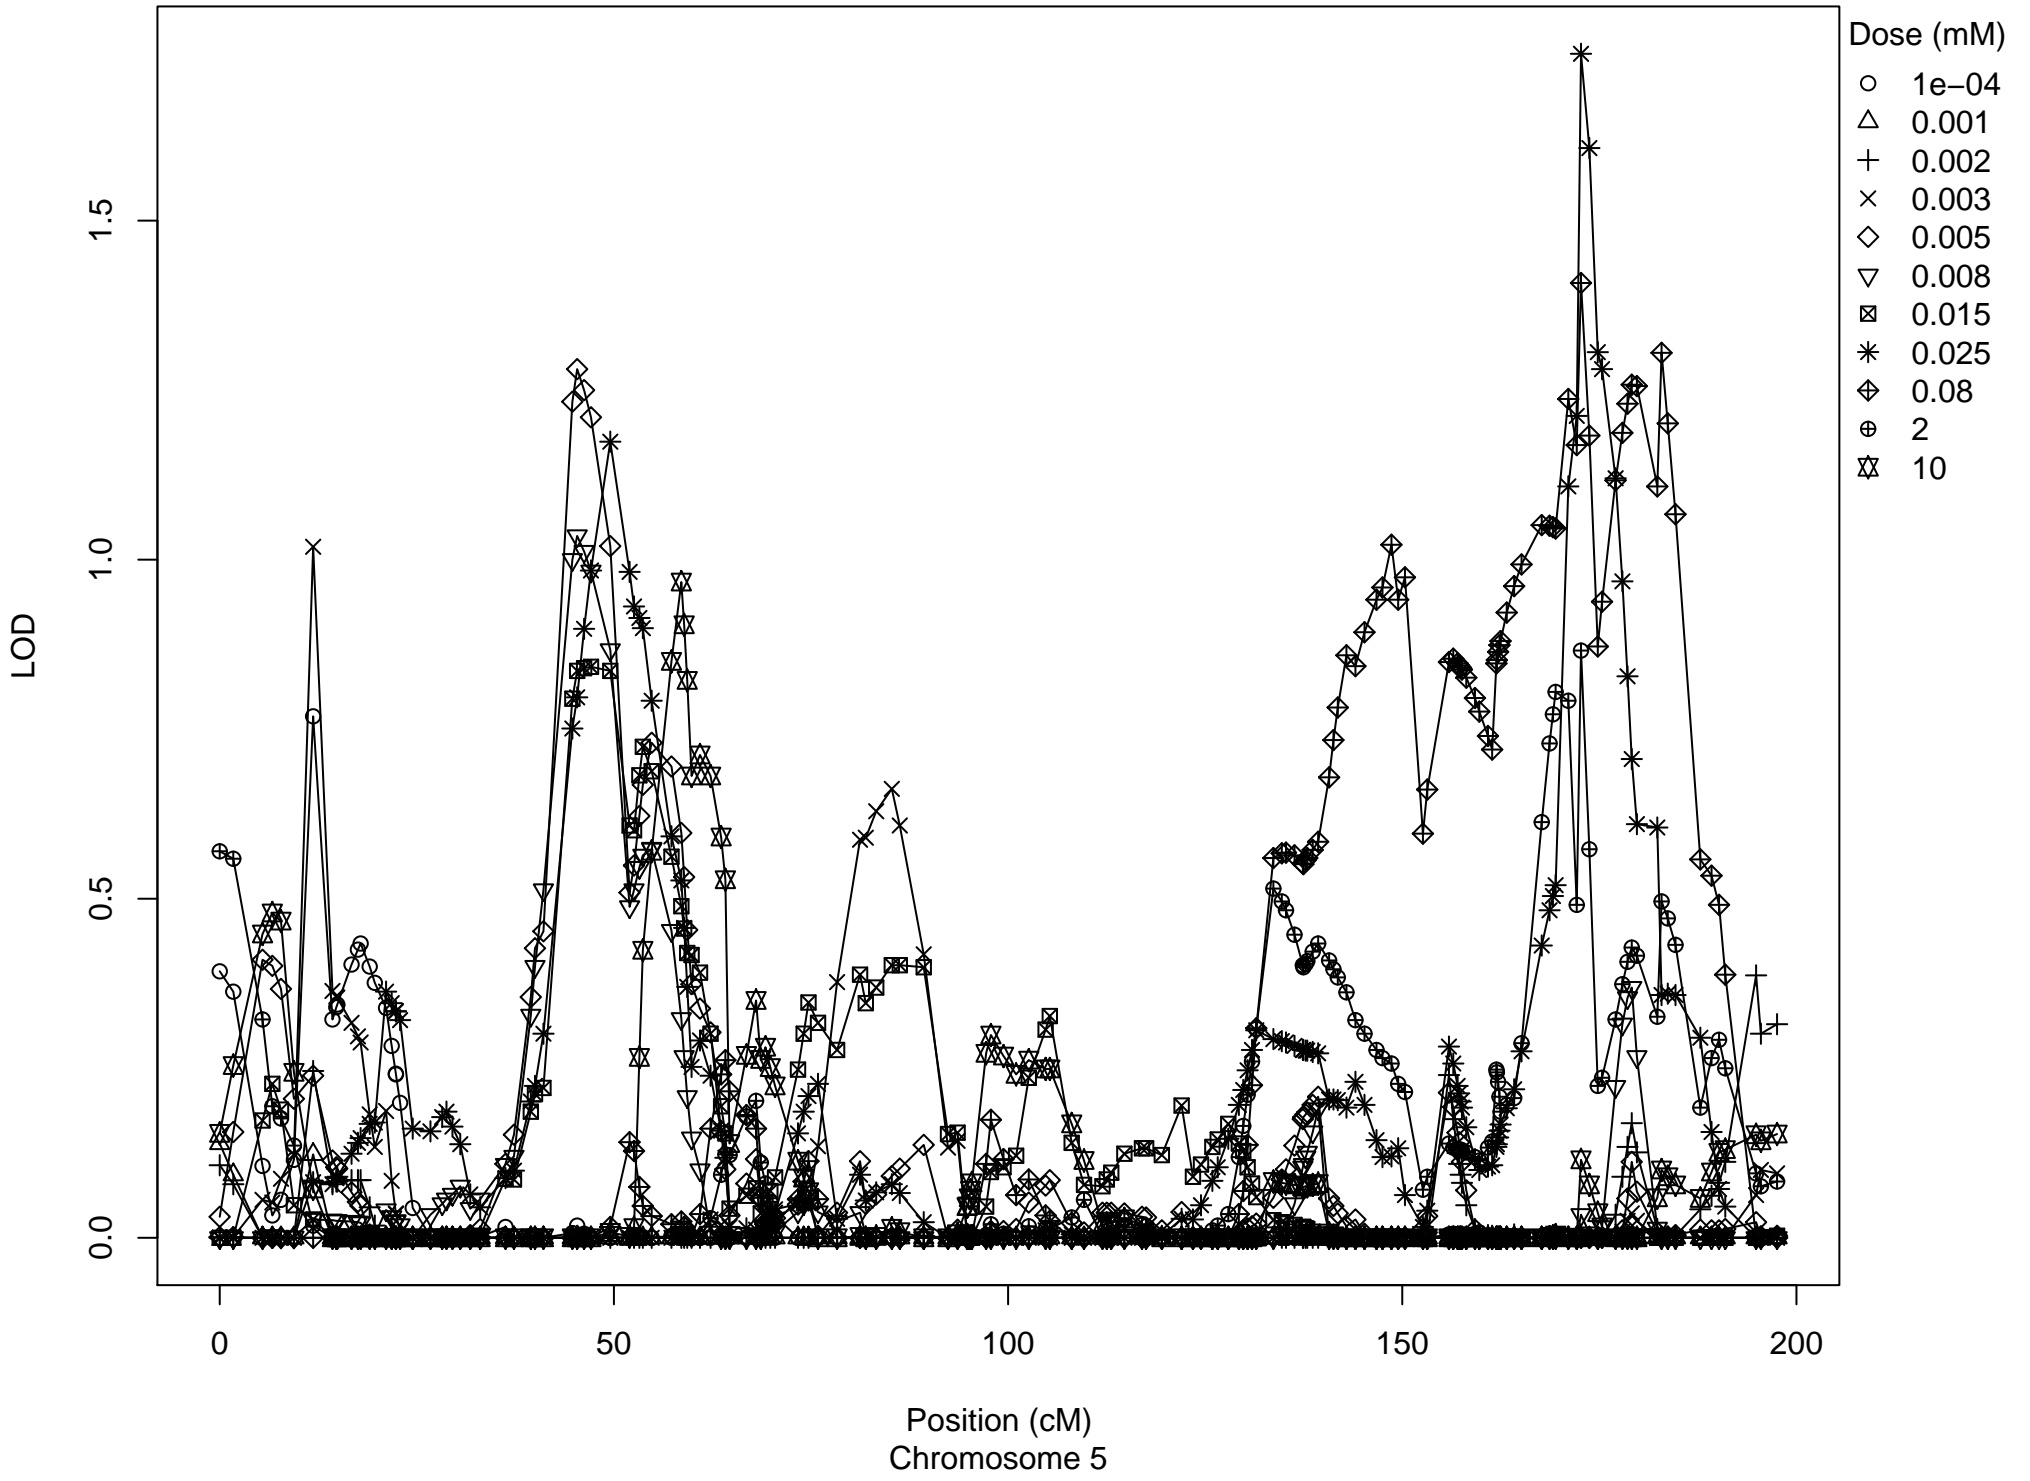

# 10-methoxy-camptothecin (mCPT)

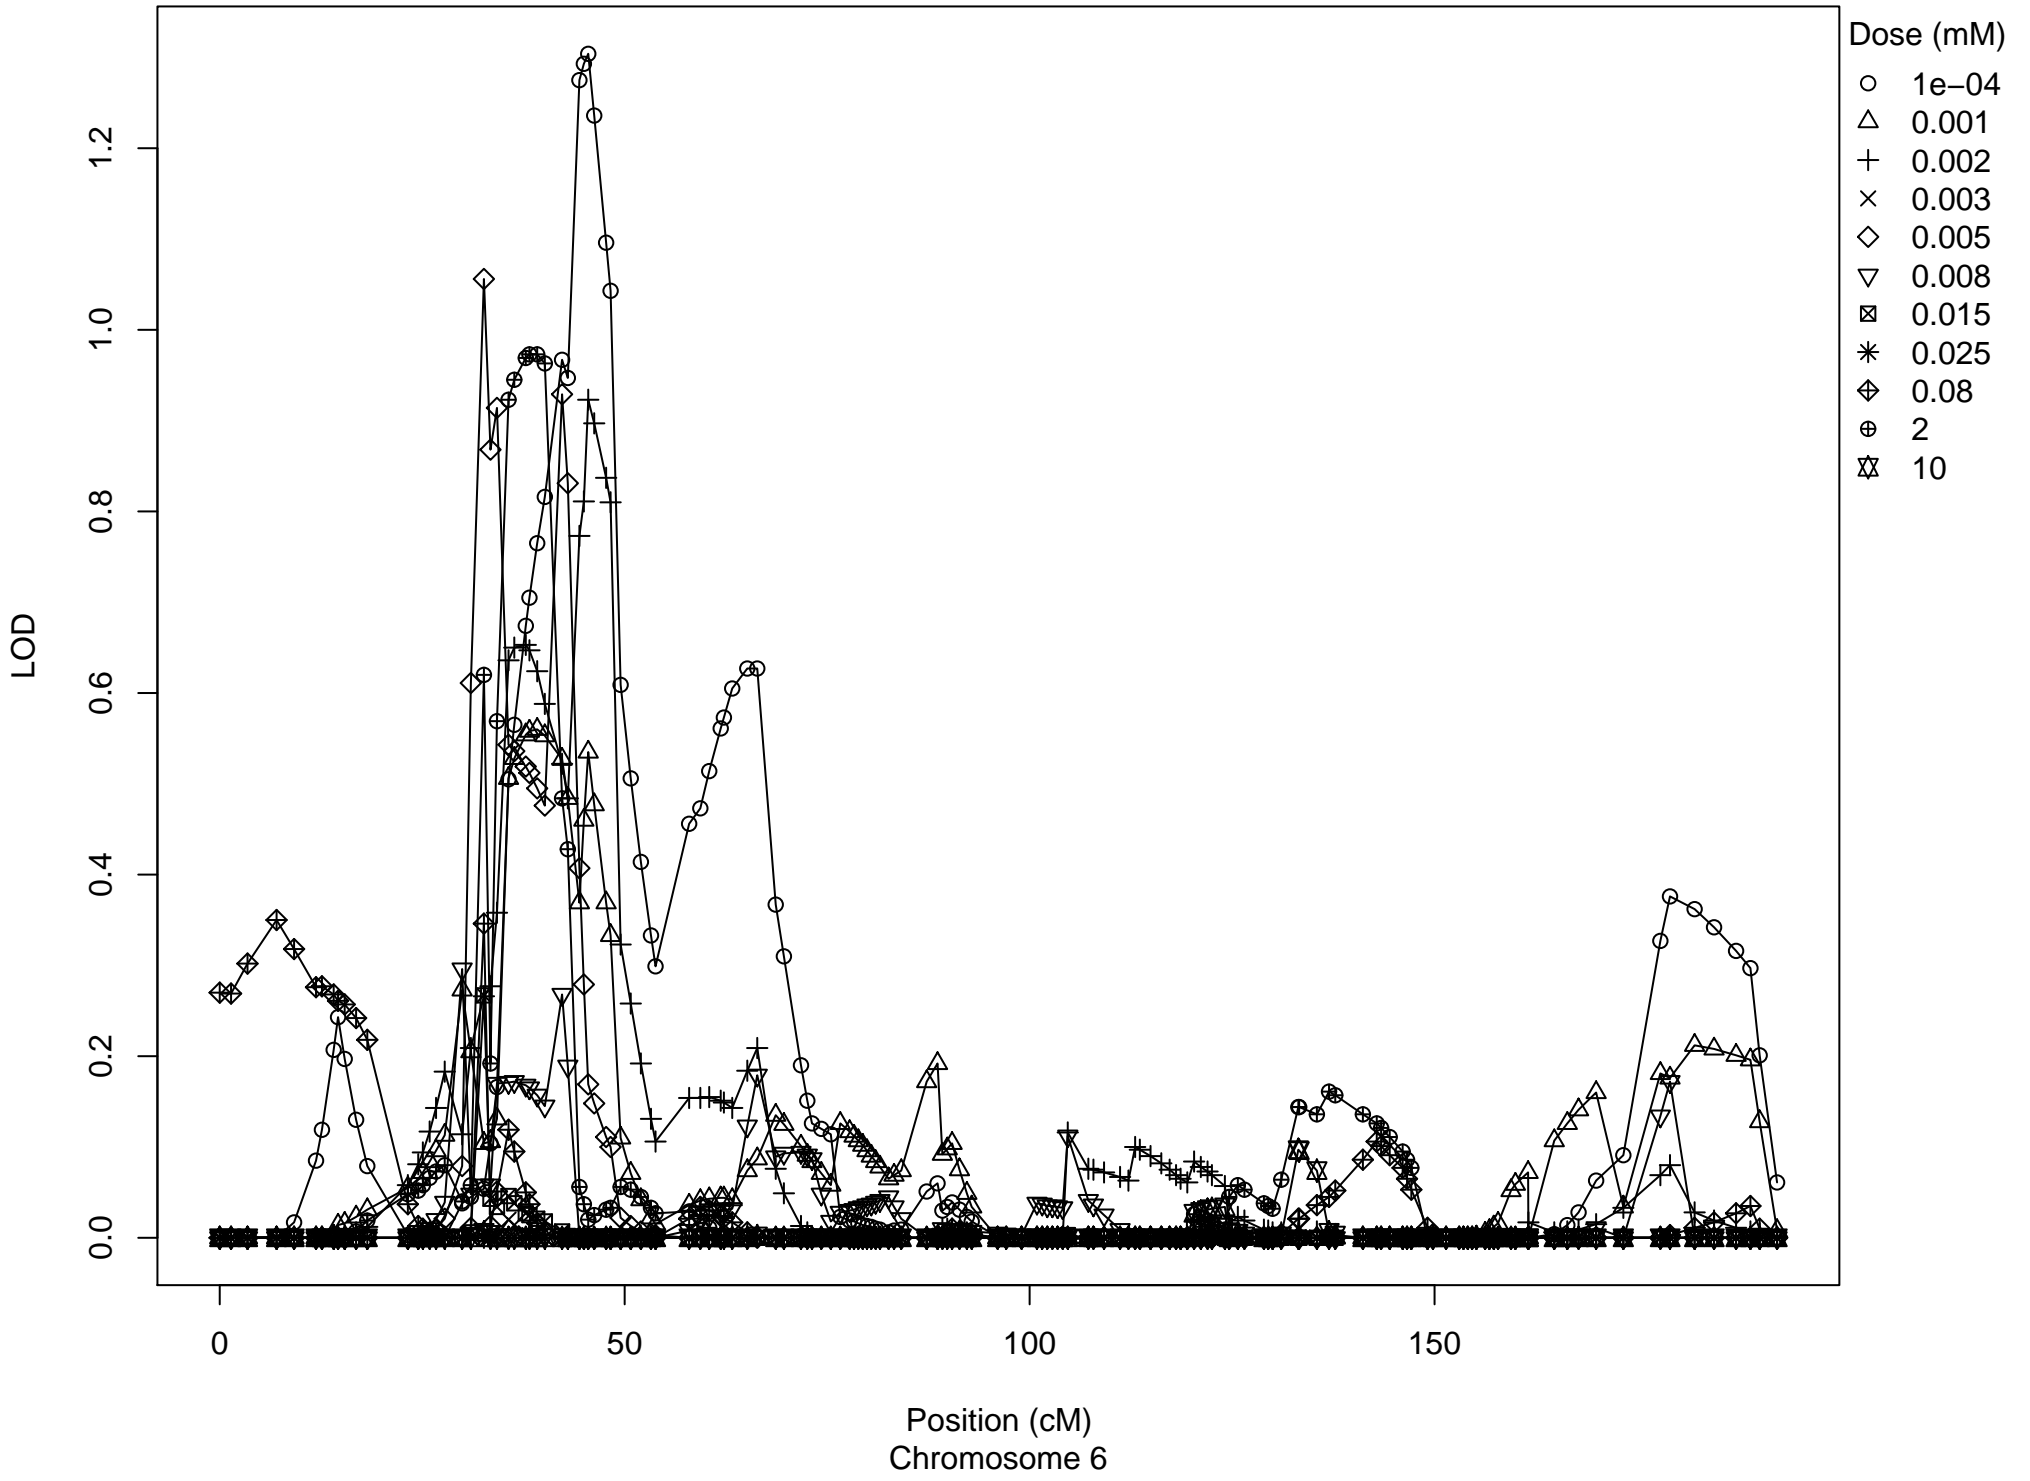





# 10-methoxy-camptothecin (mCPT)

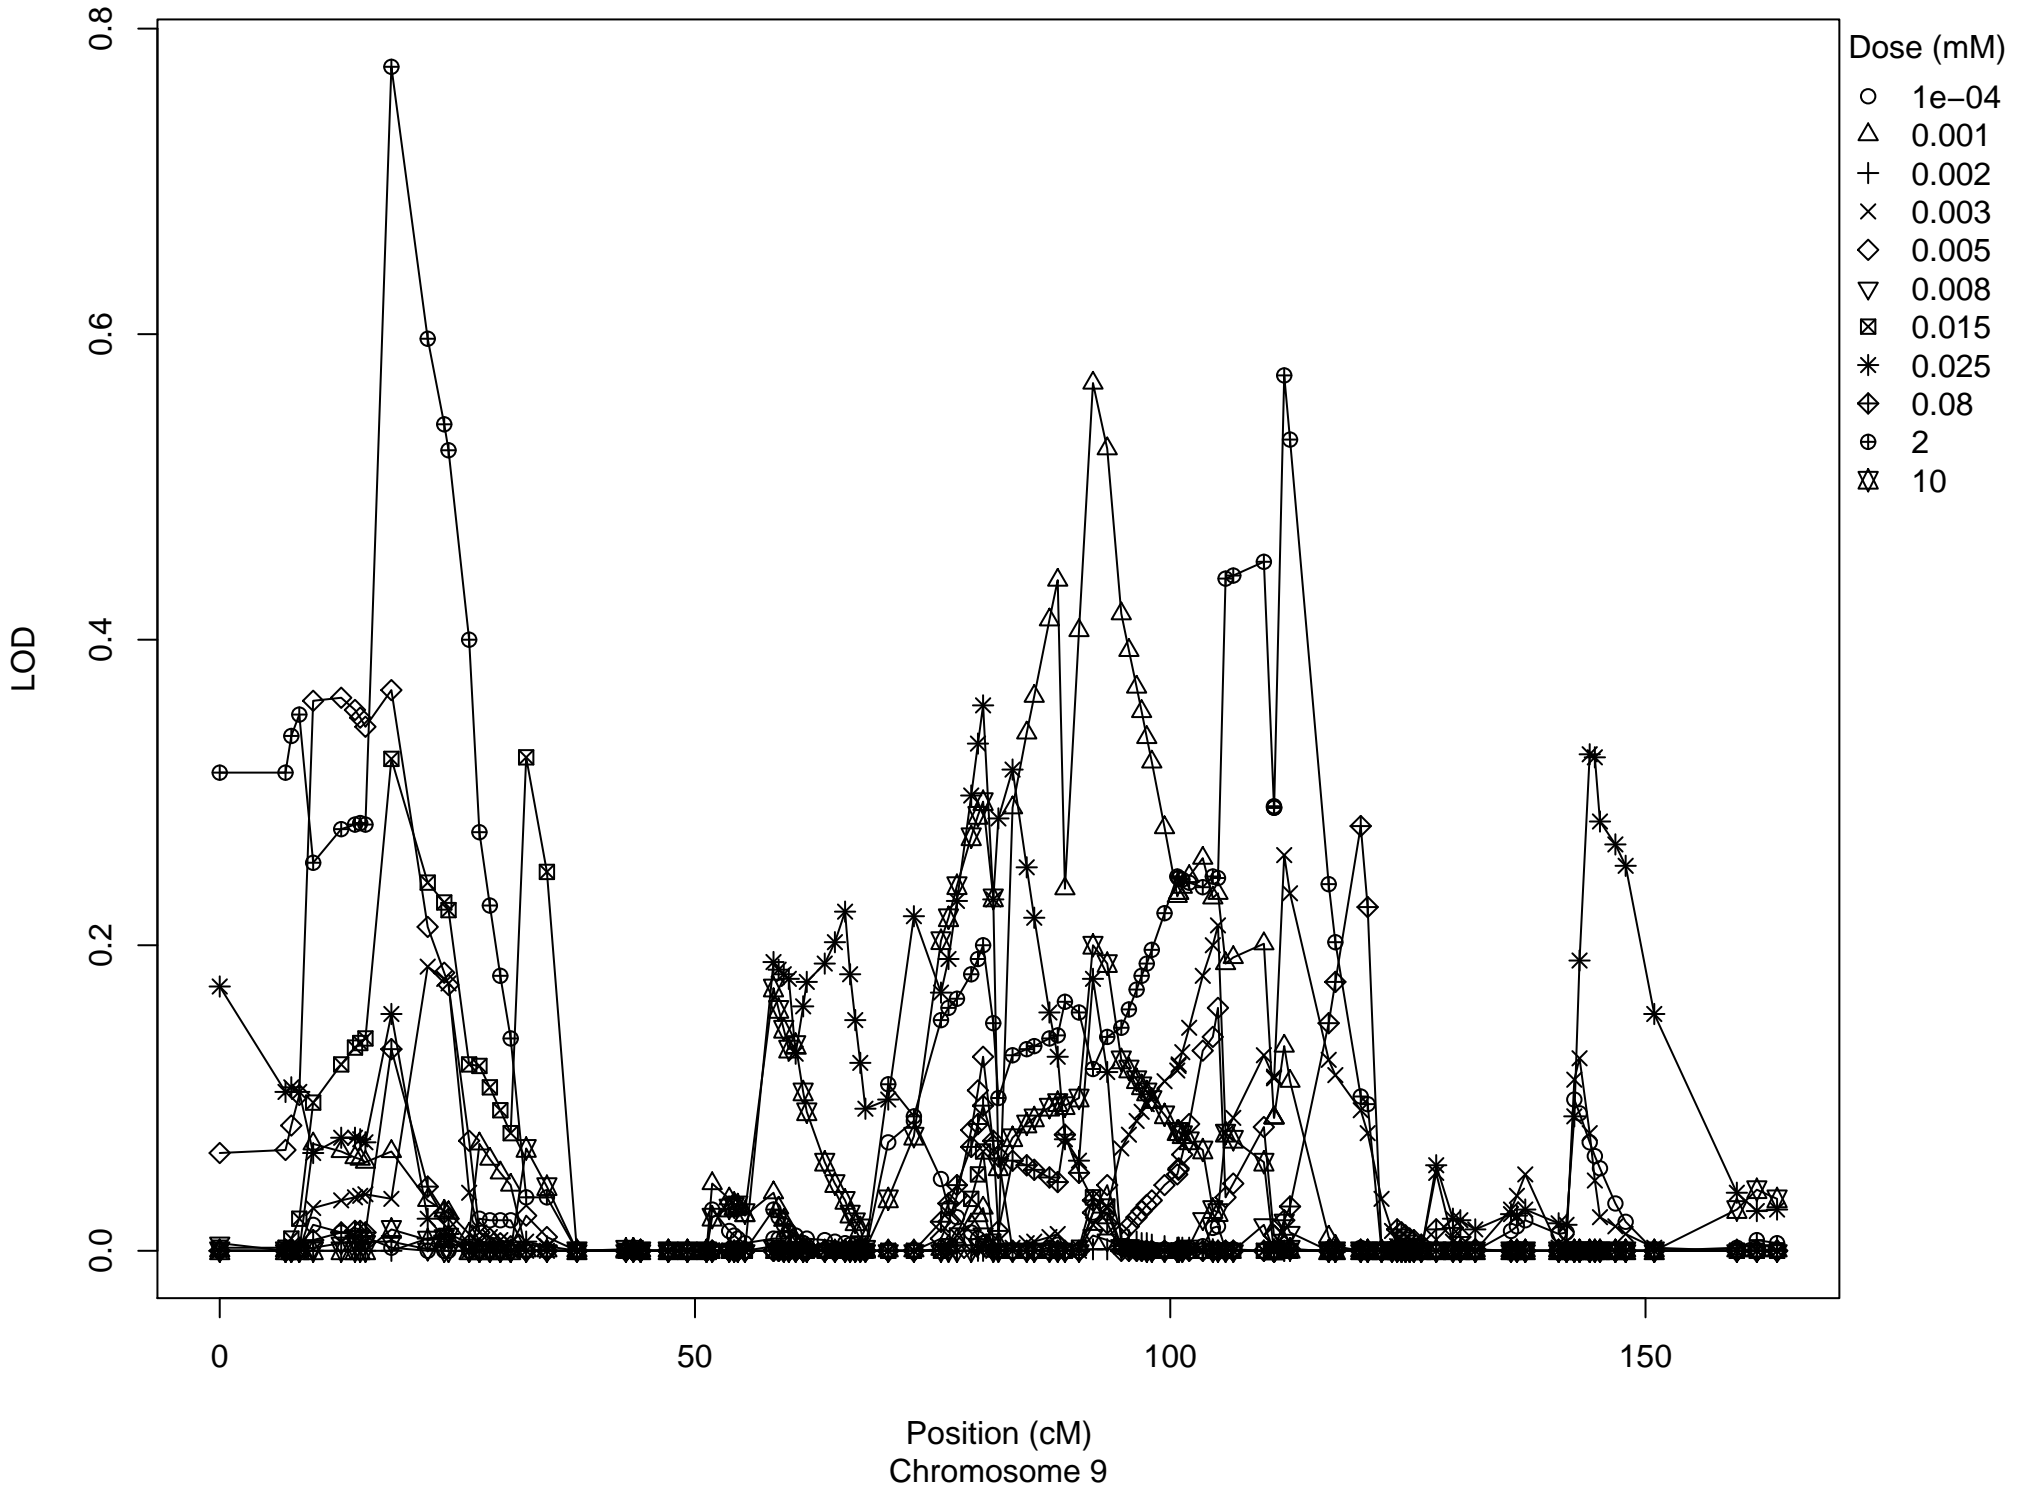

# 10-methoxy-camptothecin (mCPT)

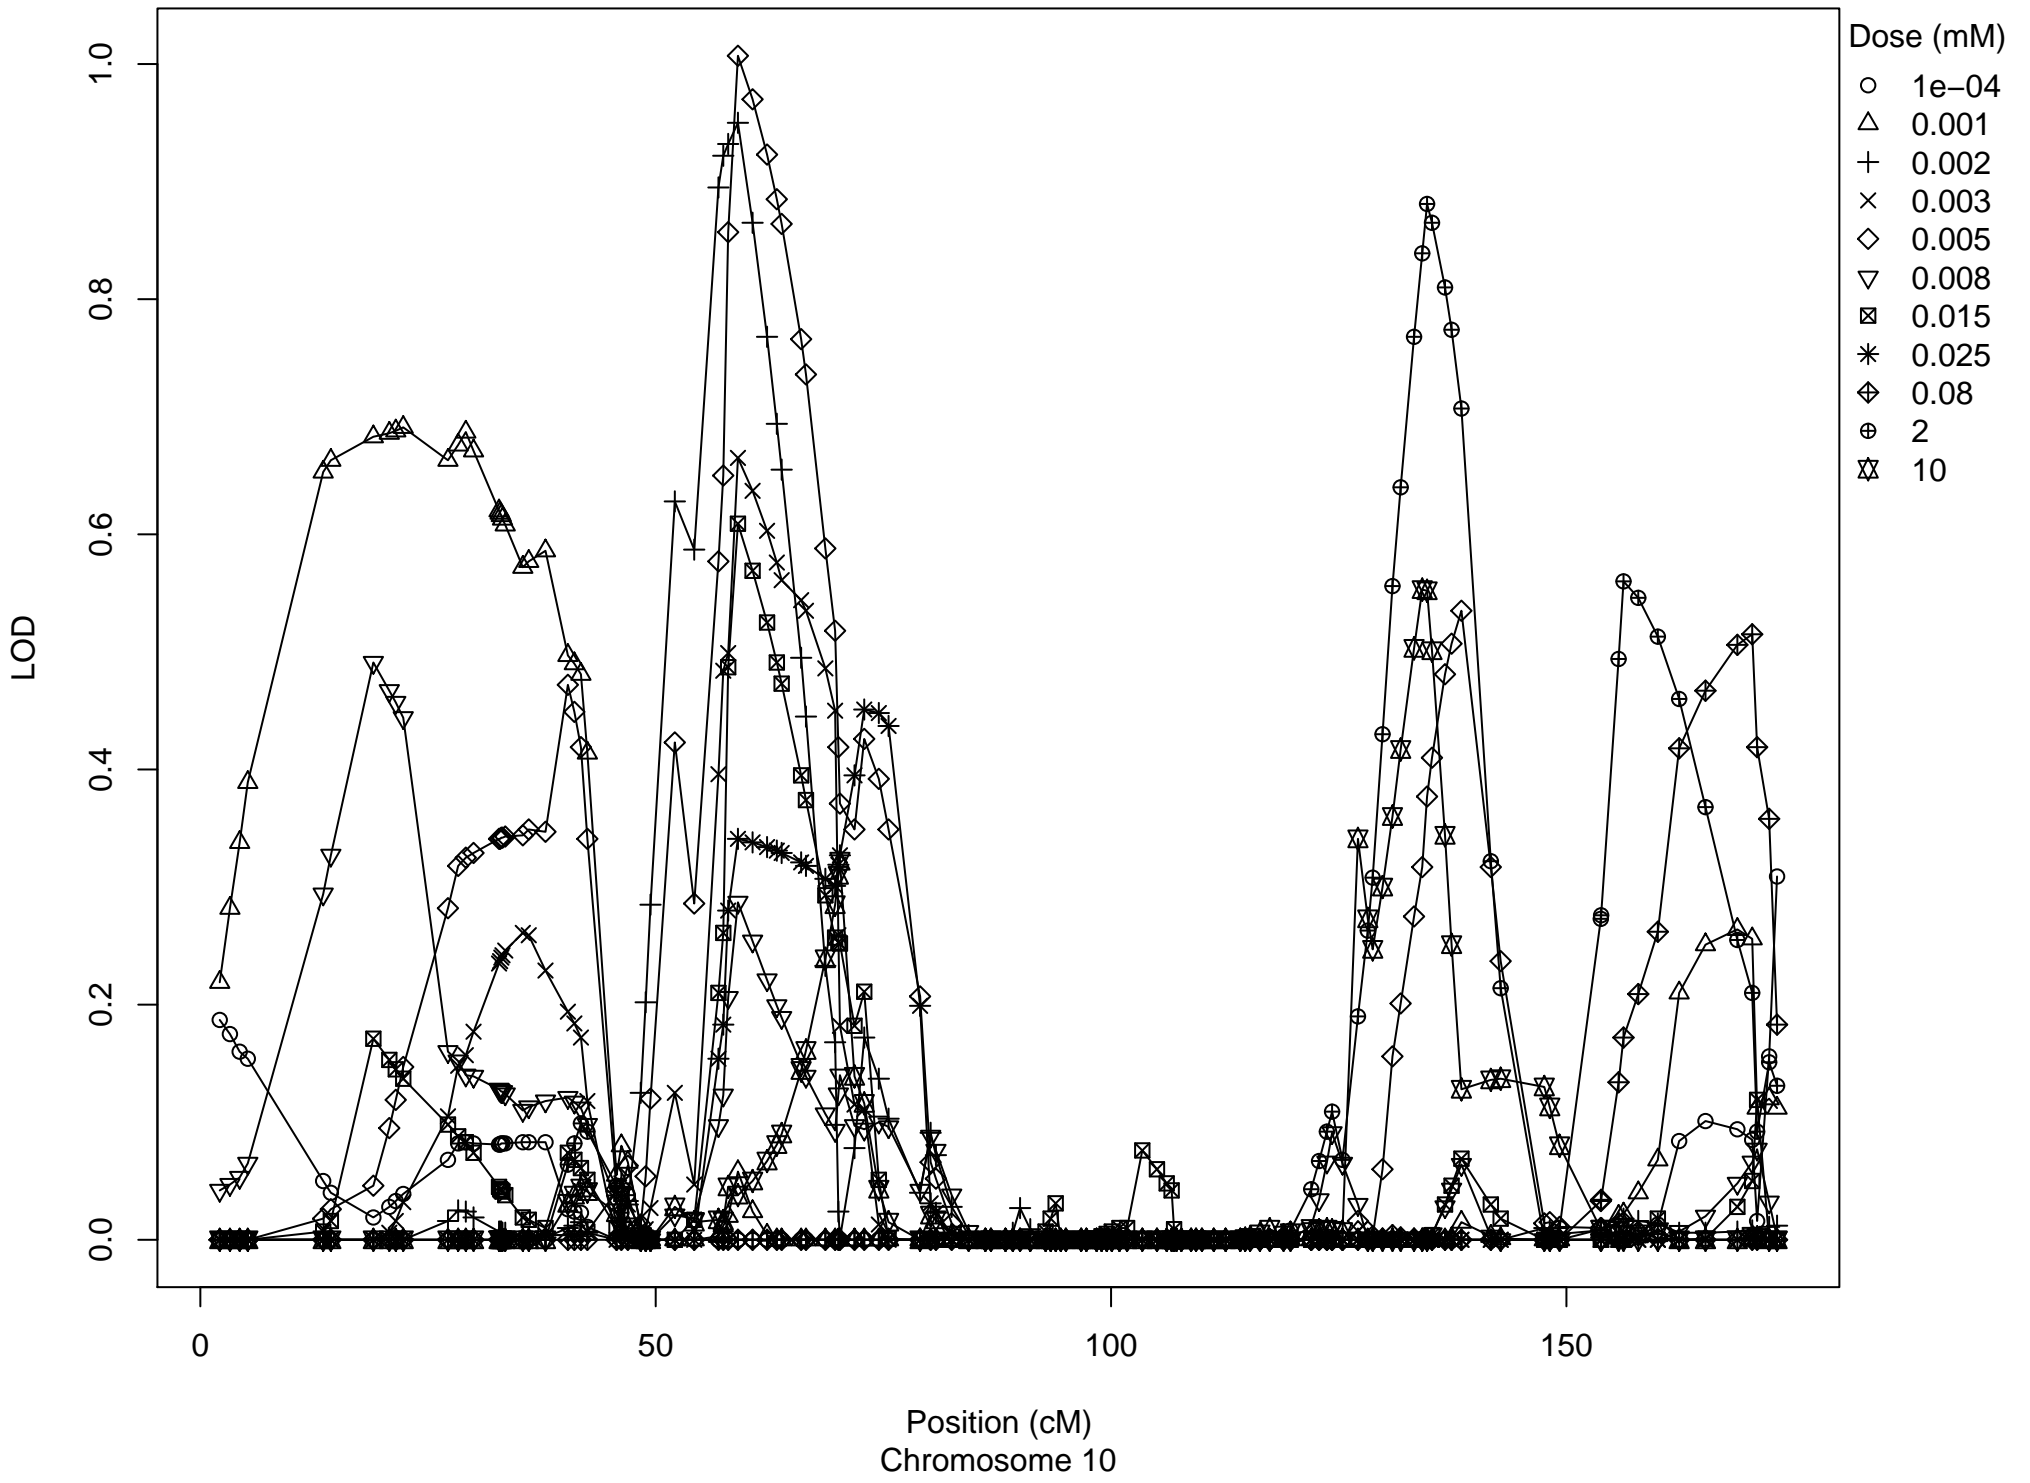



# 10-methoxy-camptothecin (mCPT)

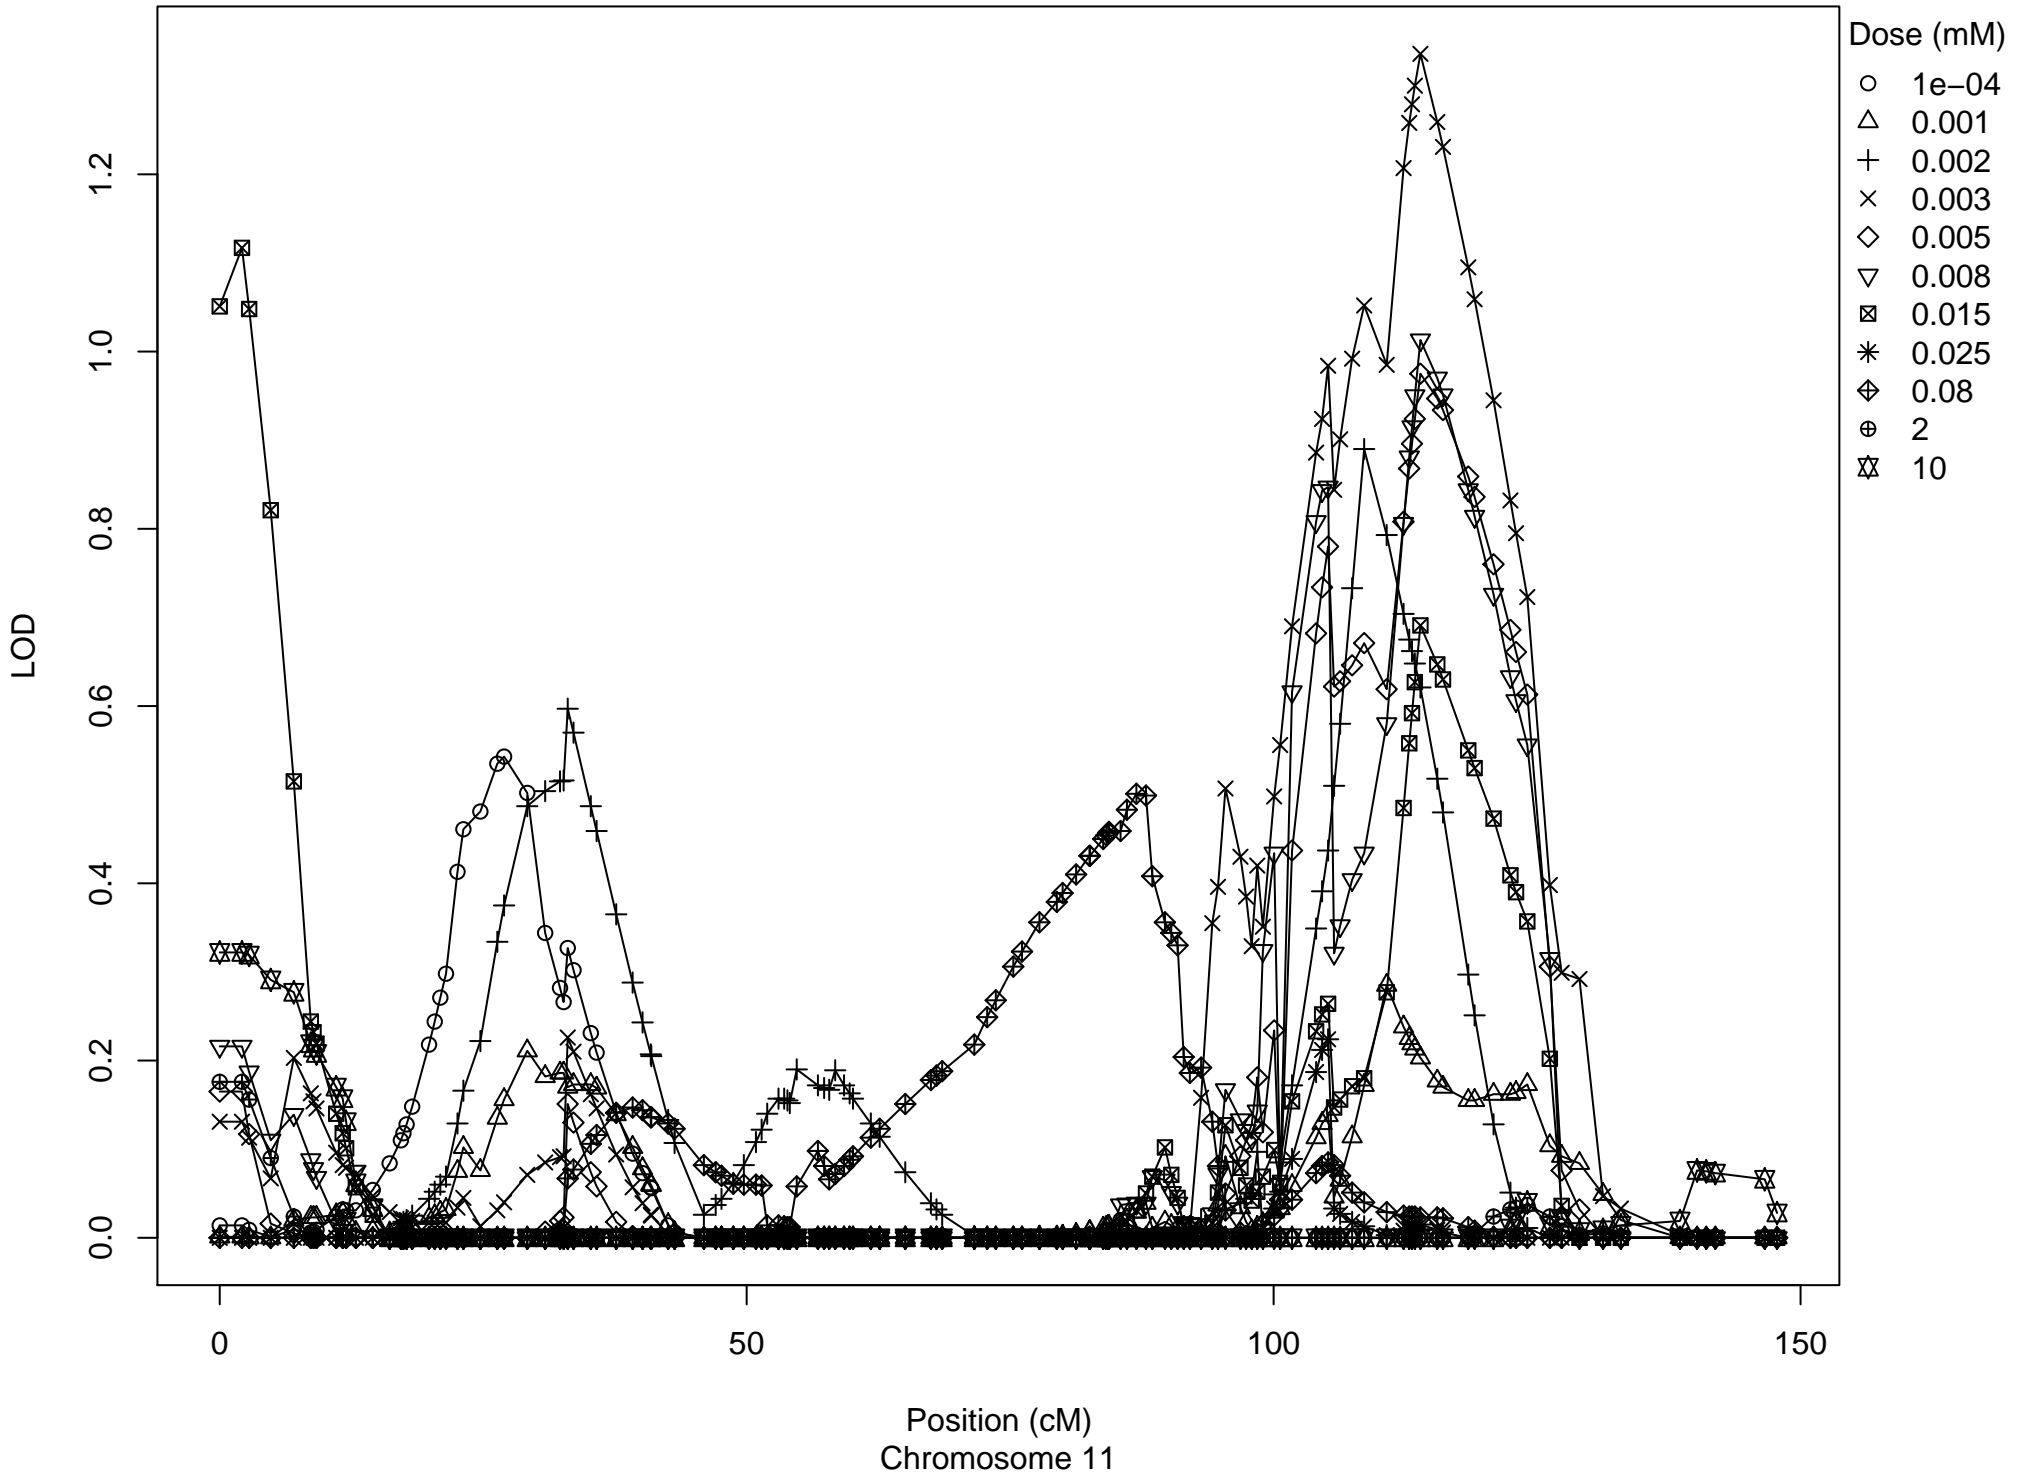

# 10-methoxy-camptothecin (mCPT)

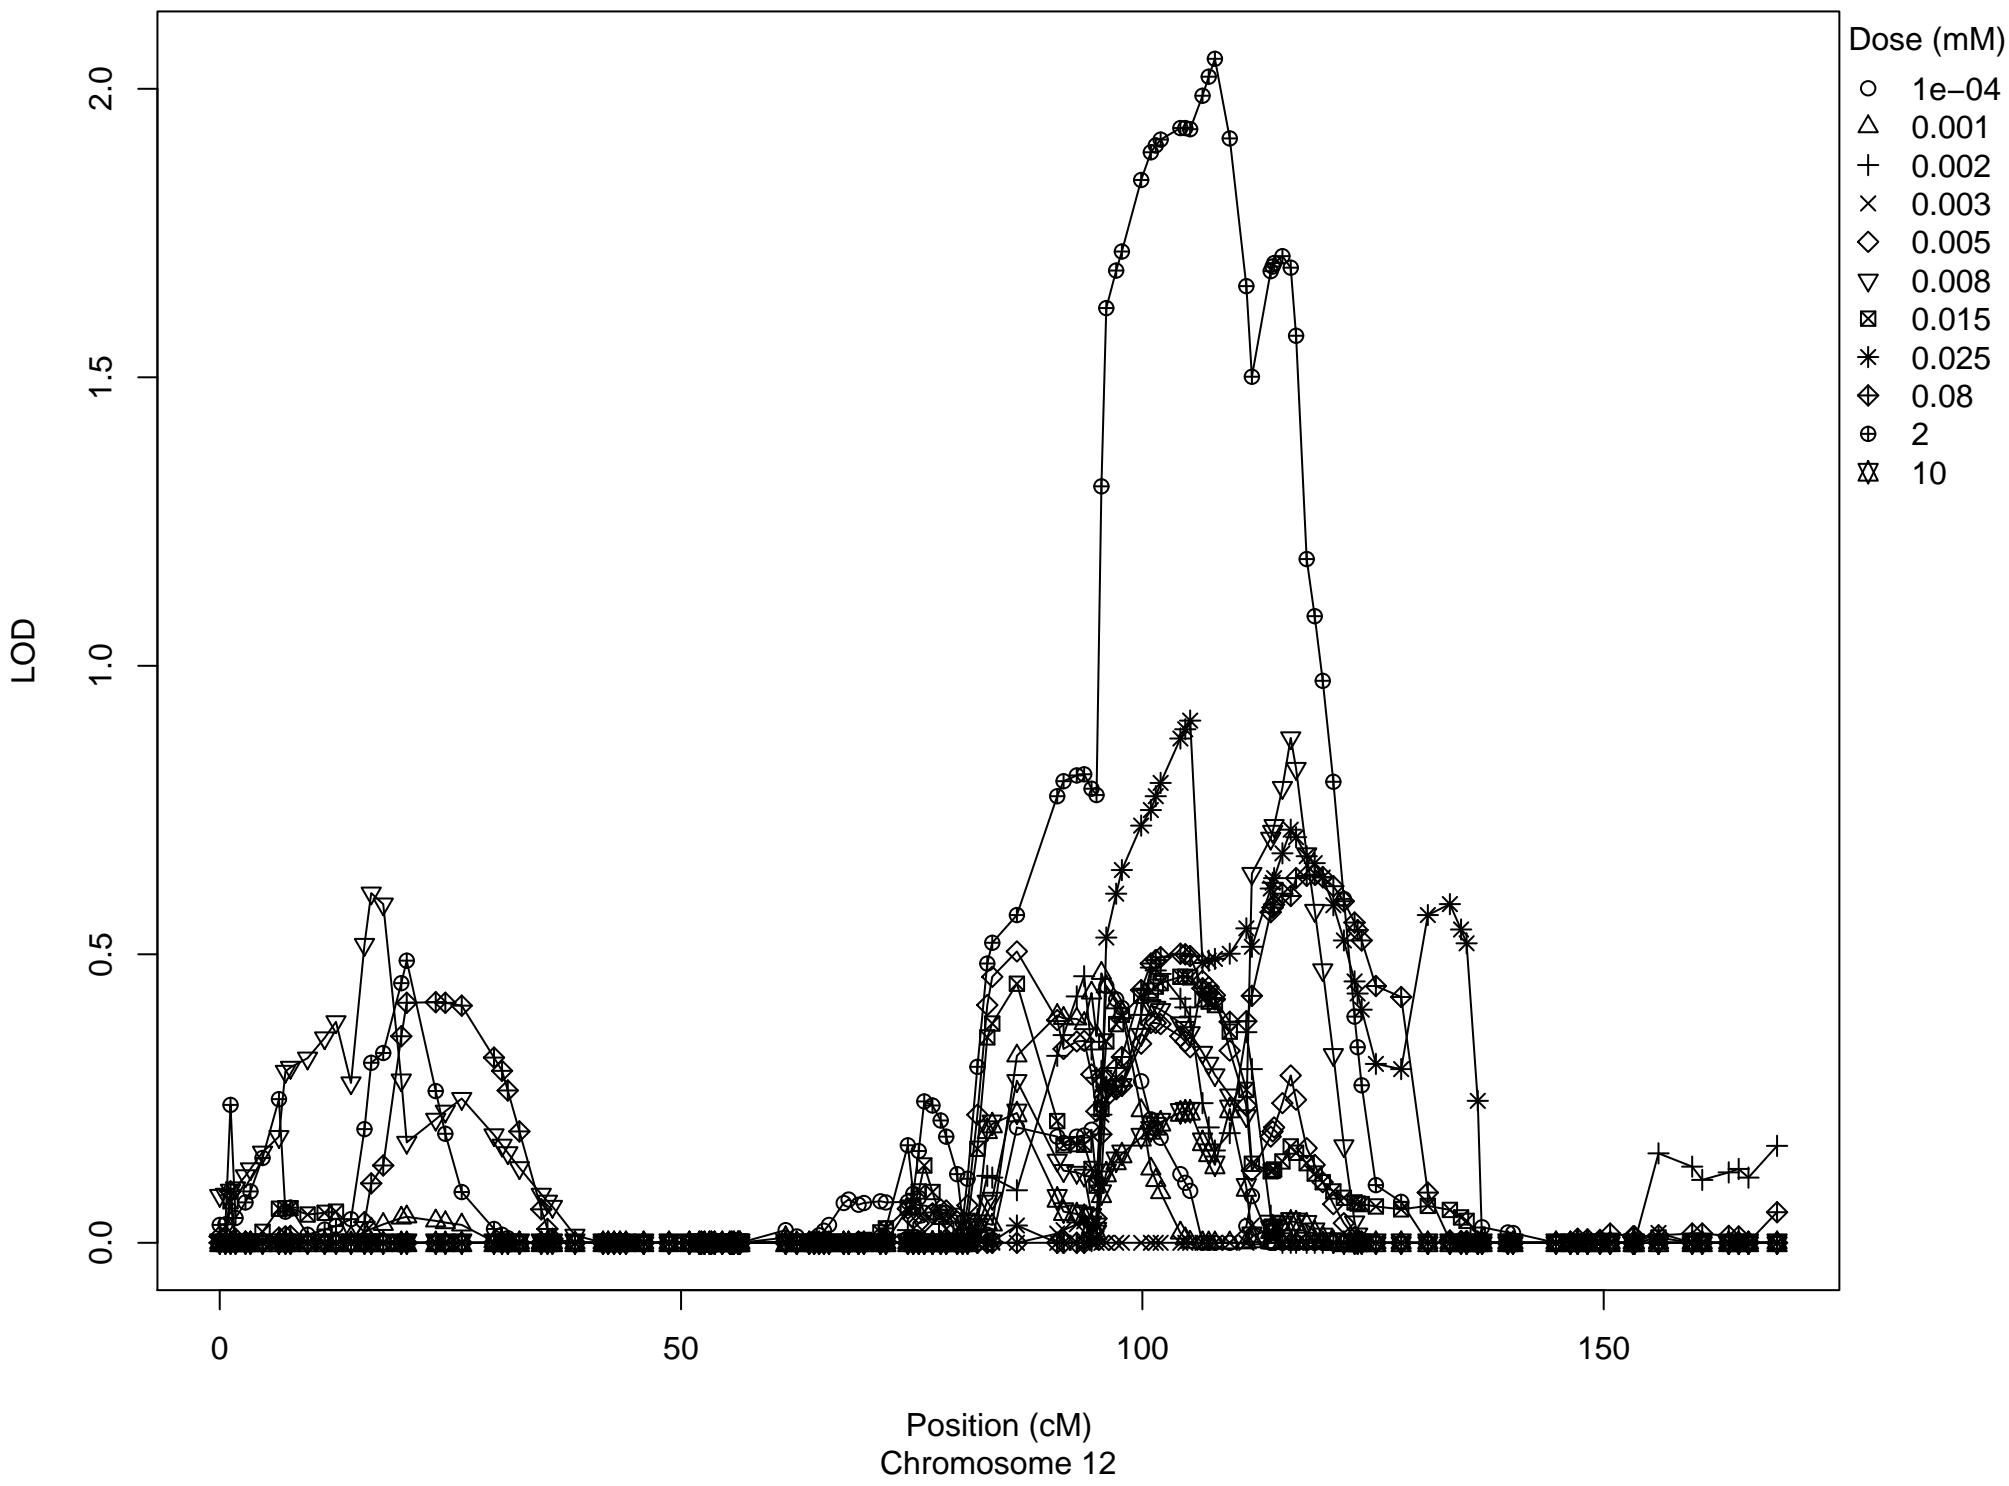

# 10-methoxy-camptothecin (mCPT)

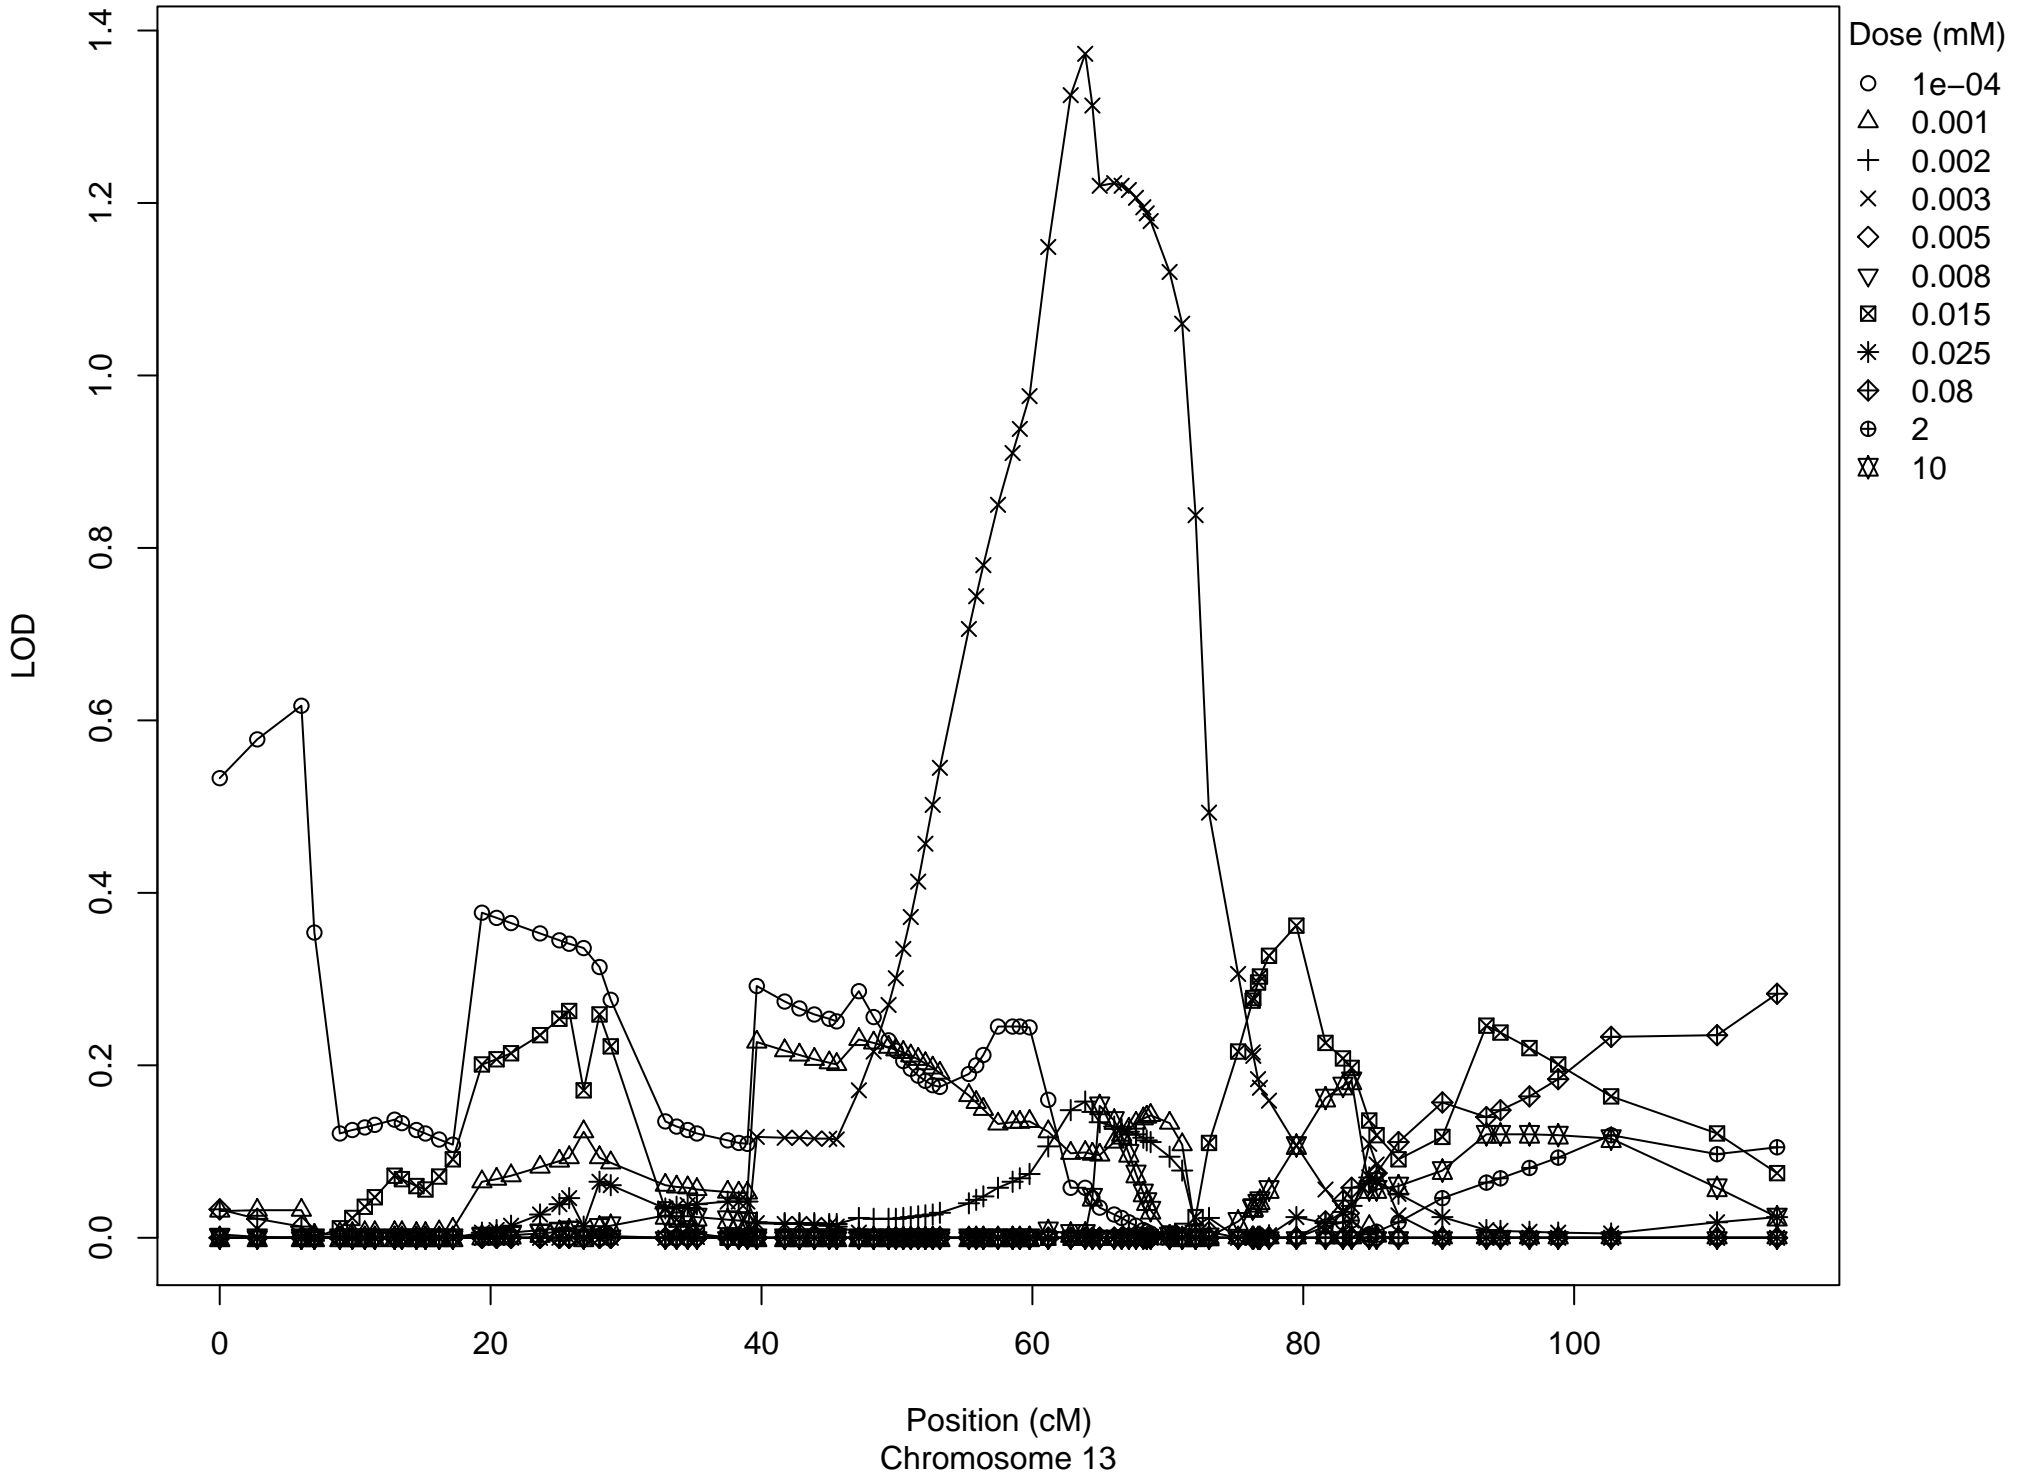

# 10-methoxy-camptothecin (mCPT)

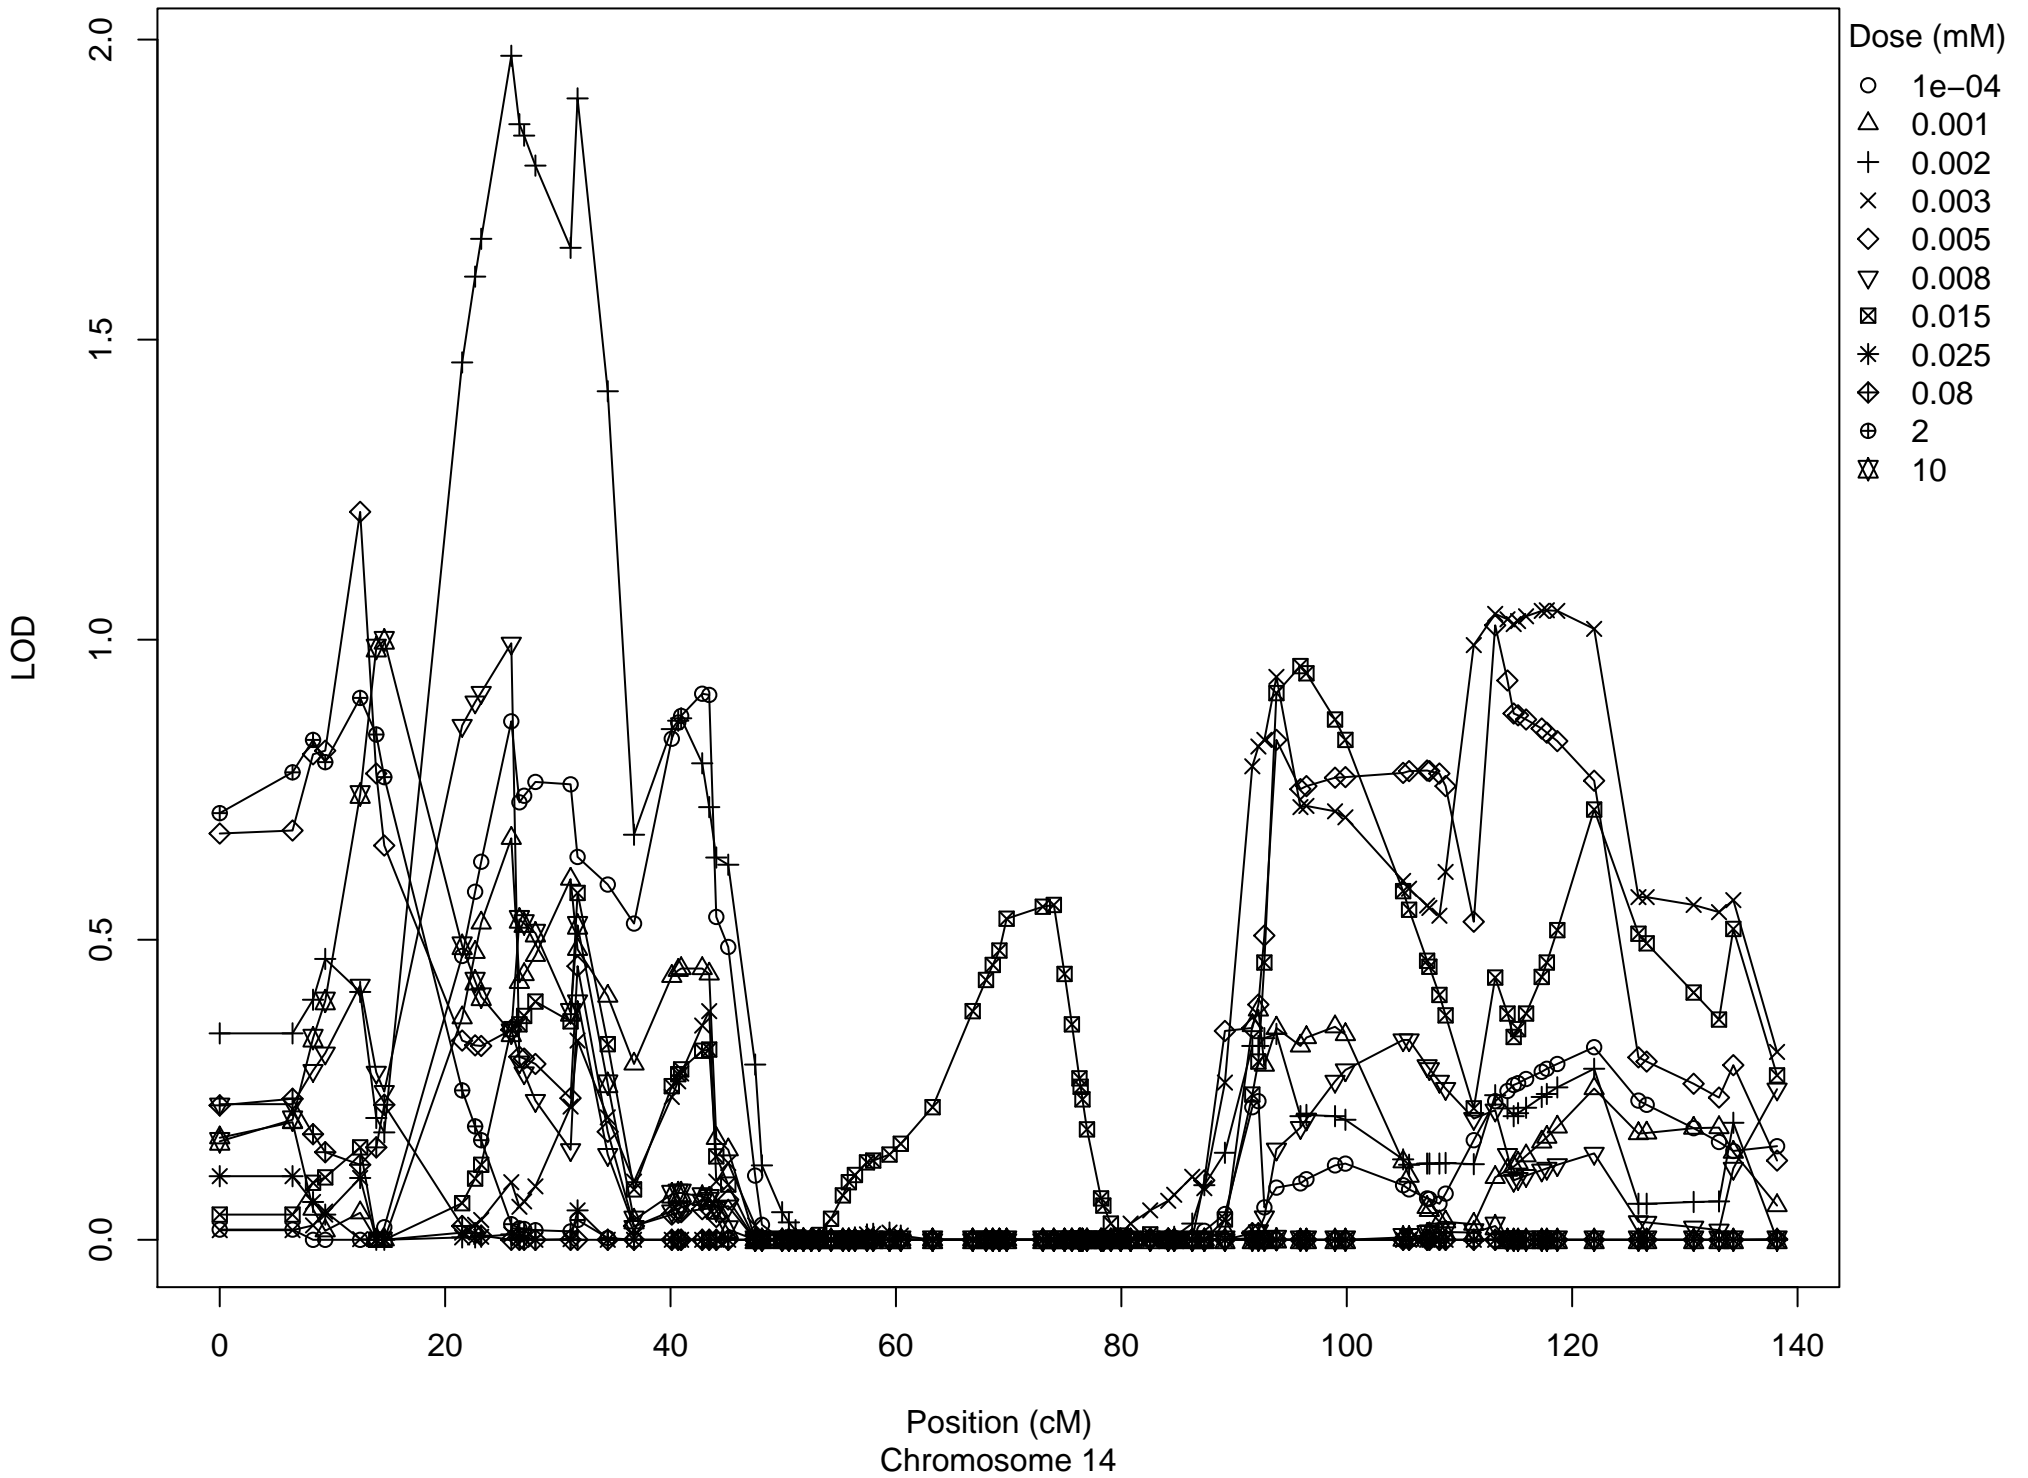

# 10-methoxy-camptothecin (mCPT)

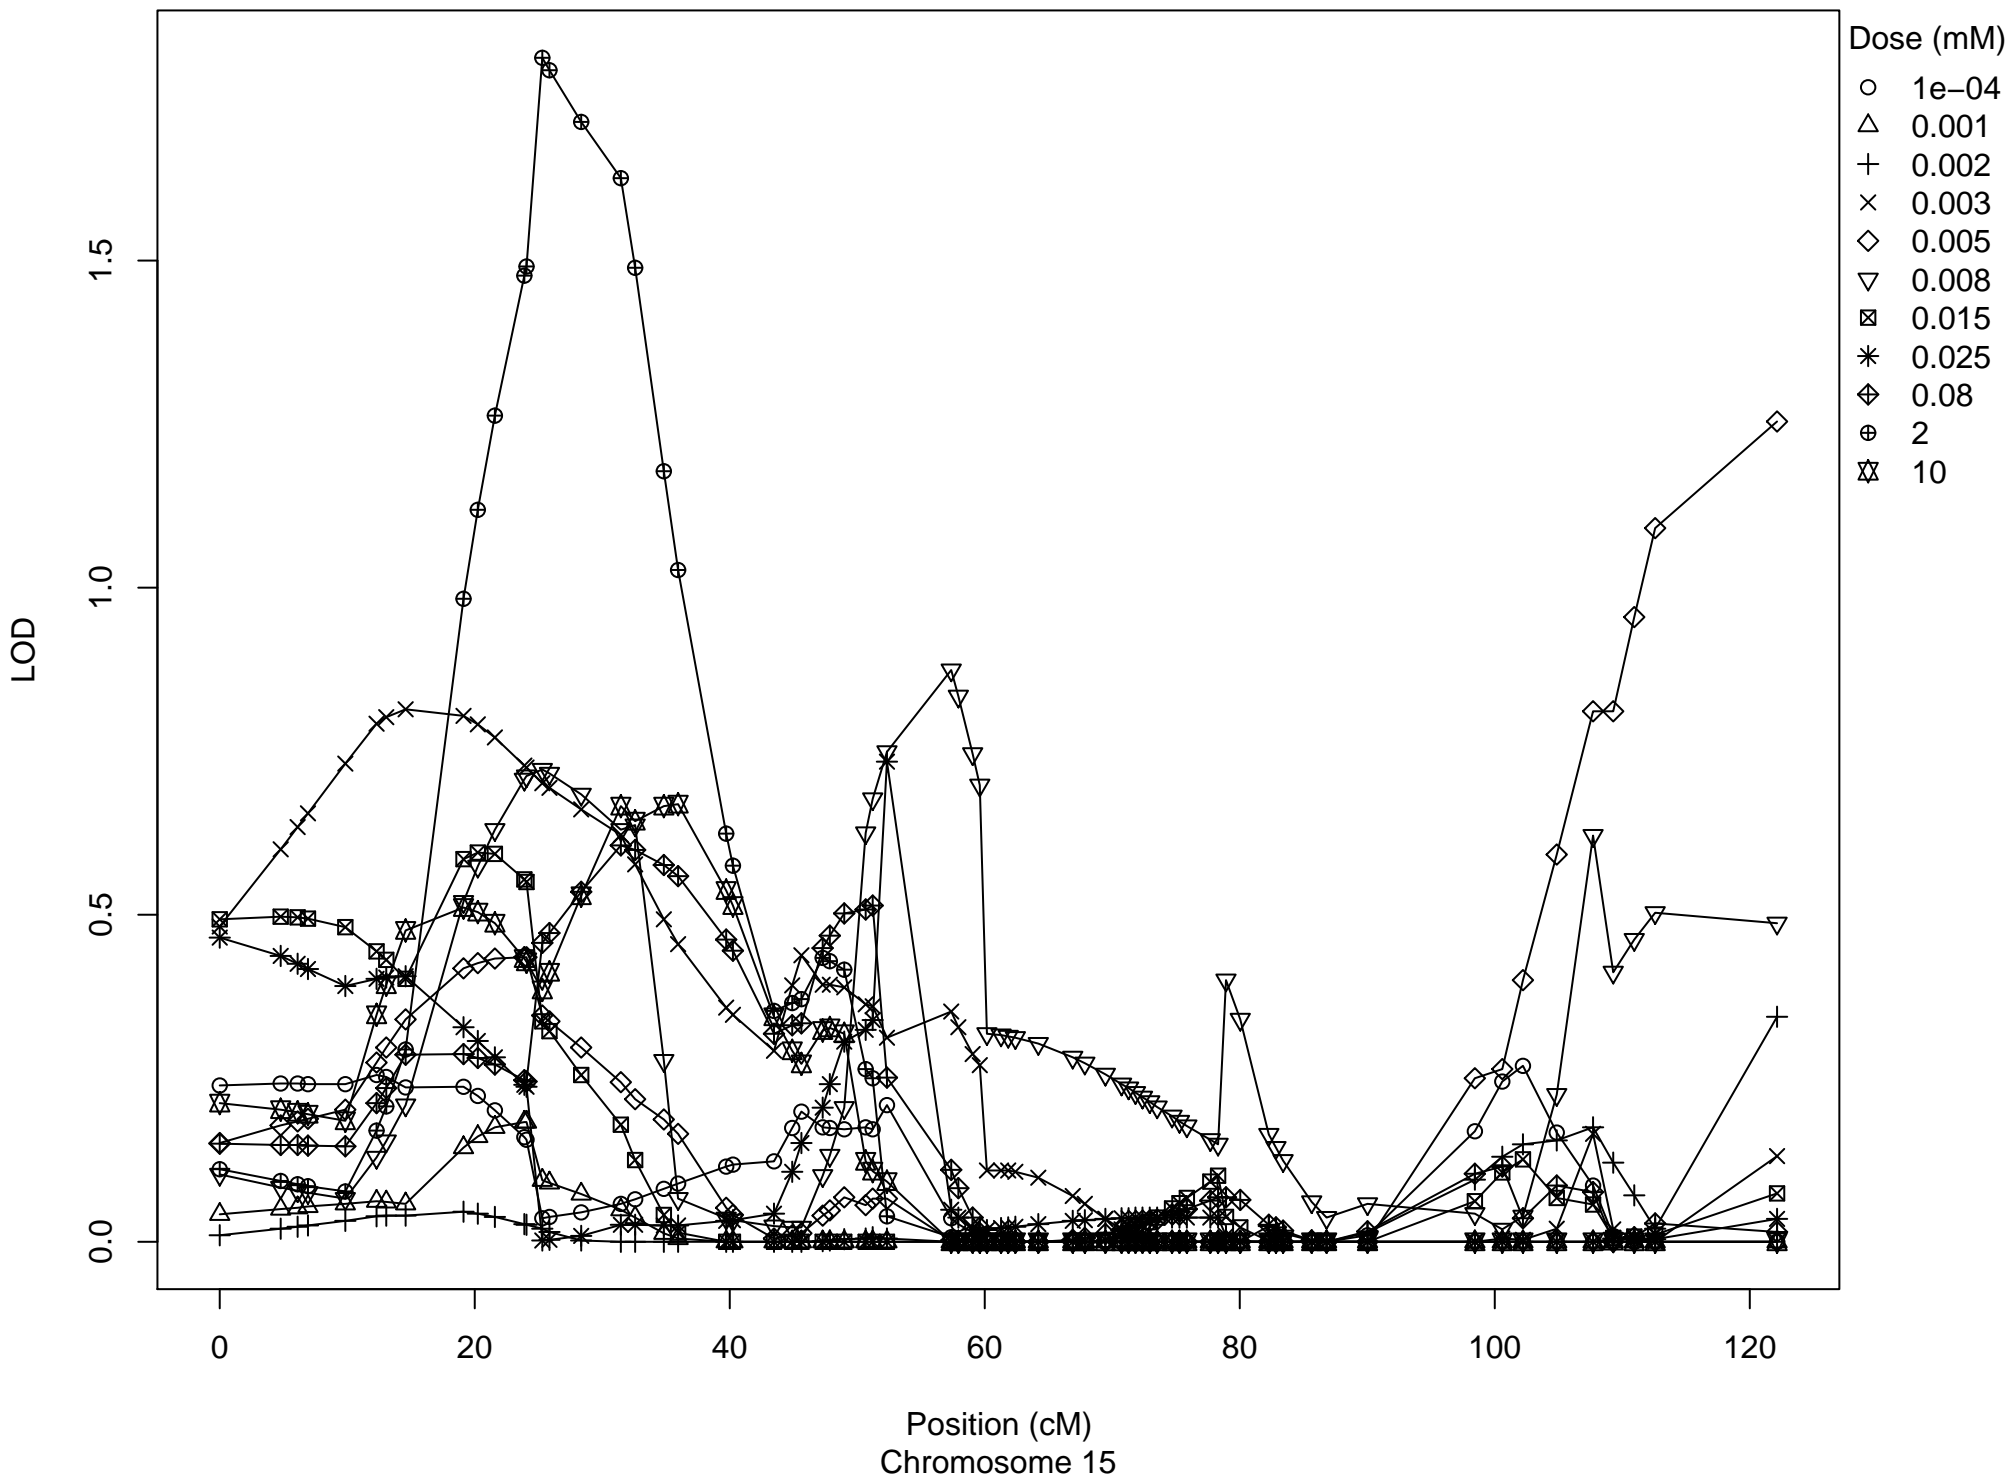

# 10-methoxy-camptothecin (mCPT)

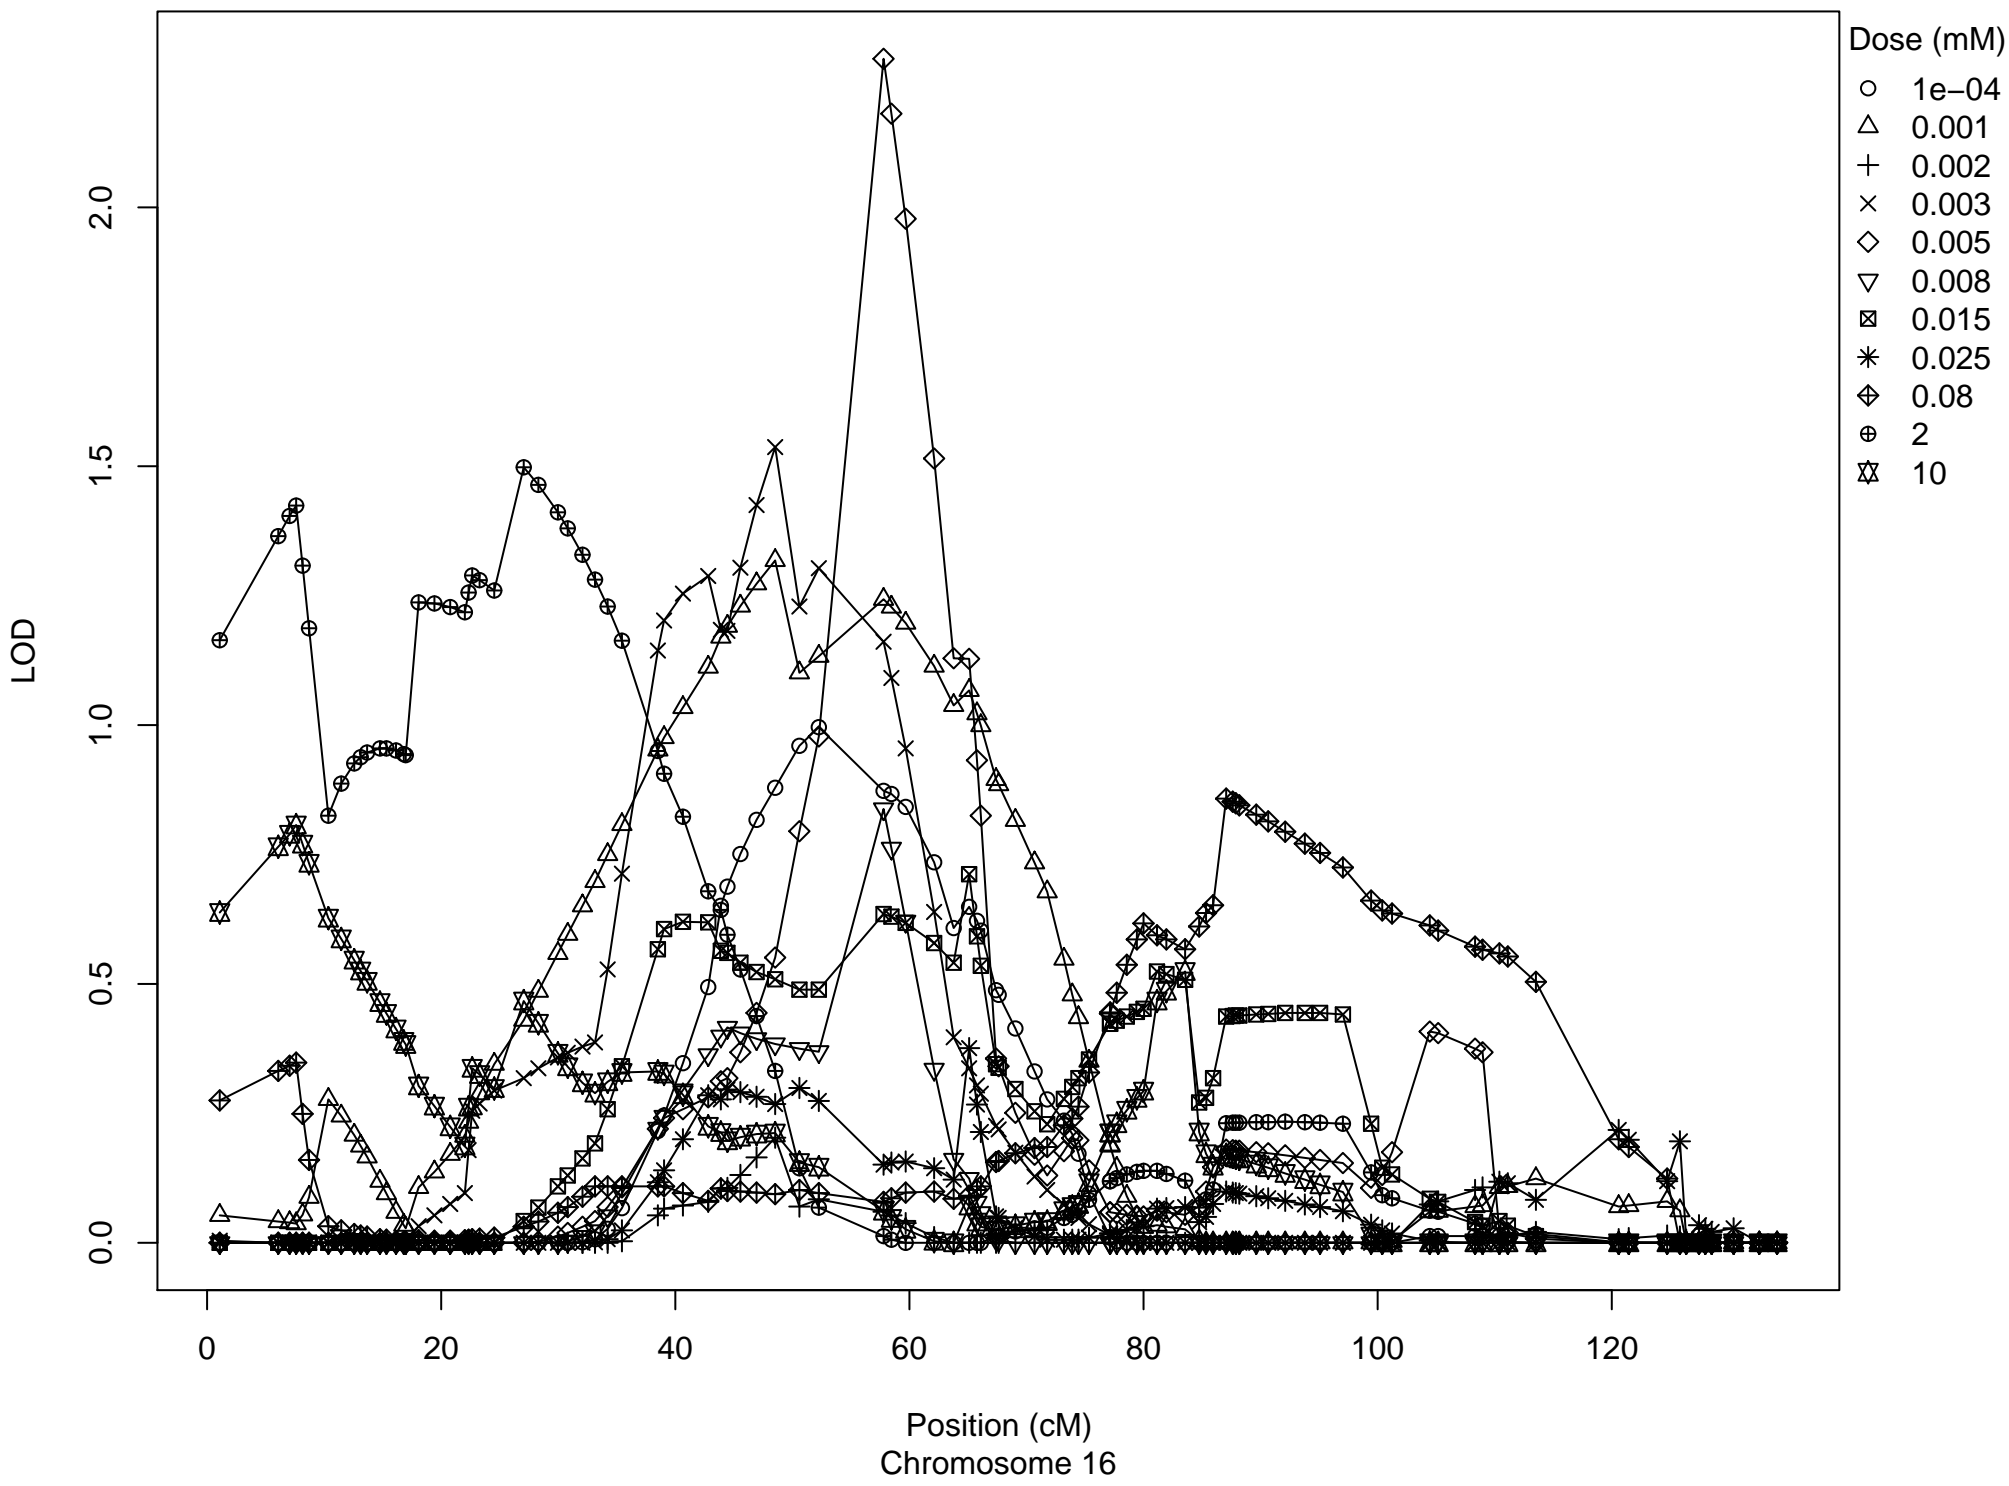

# 10-methoxy-camptothecin (mCPT)

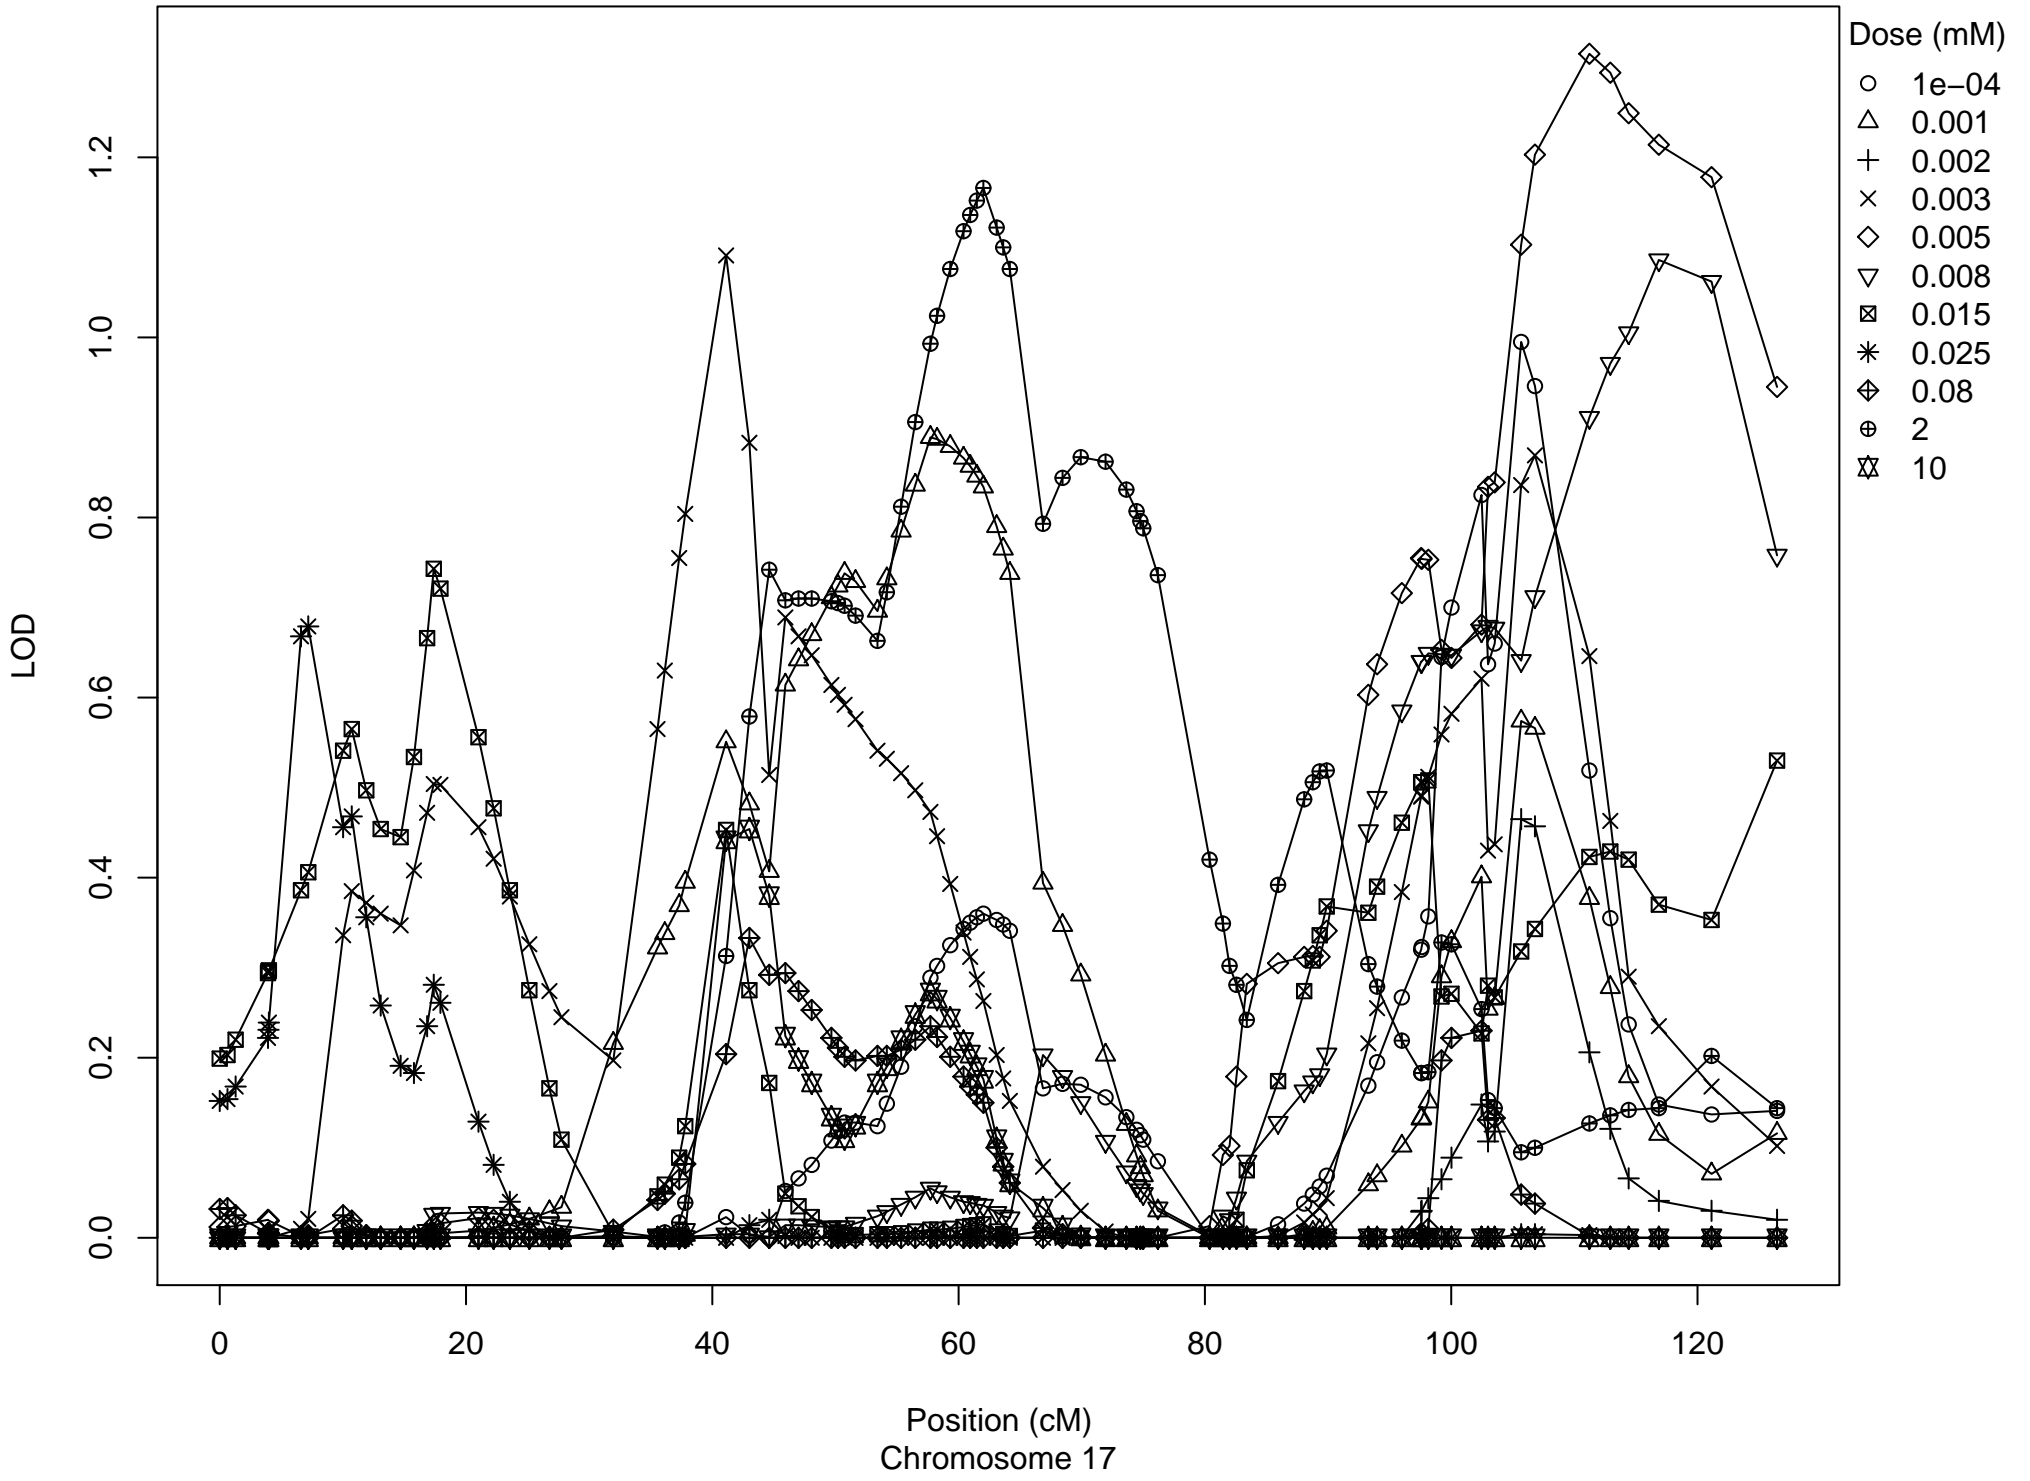

# 10-methoxy-camptothecin (mCPT)

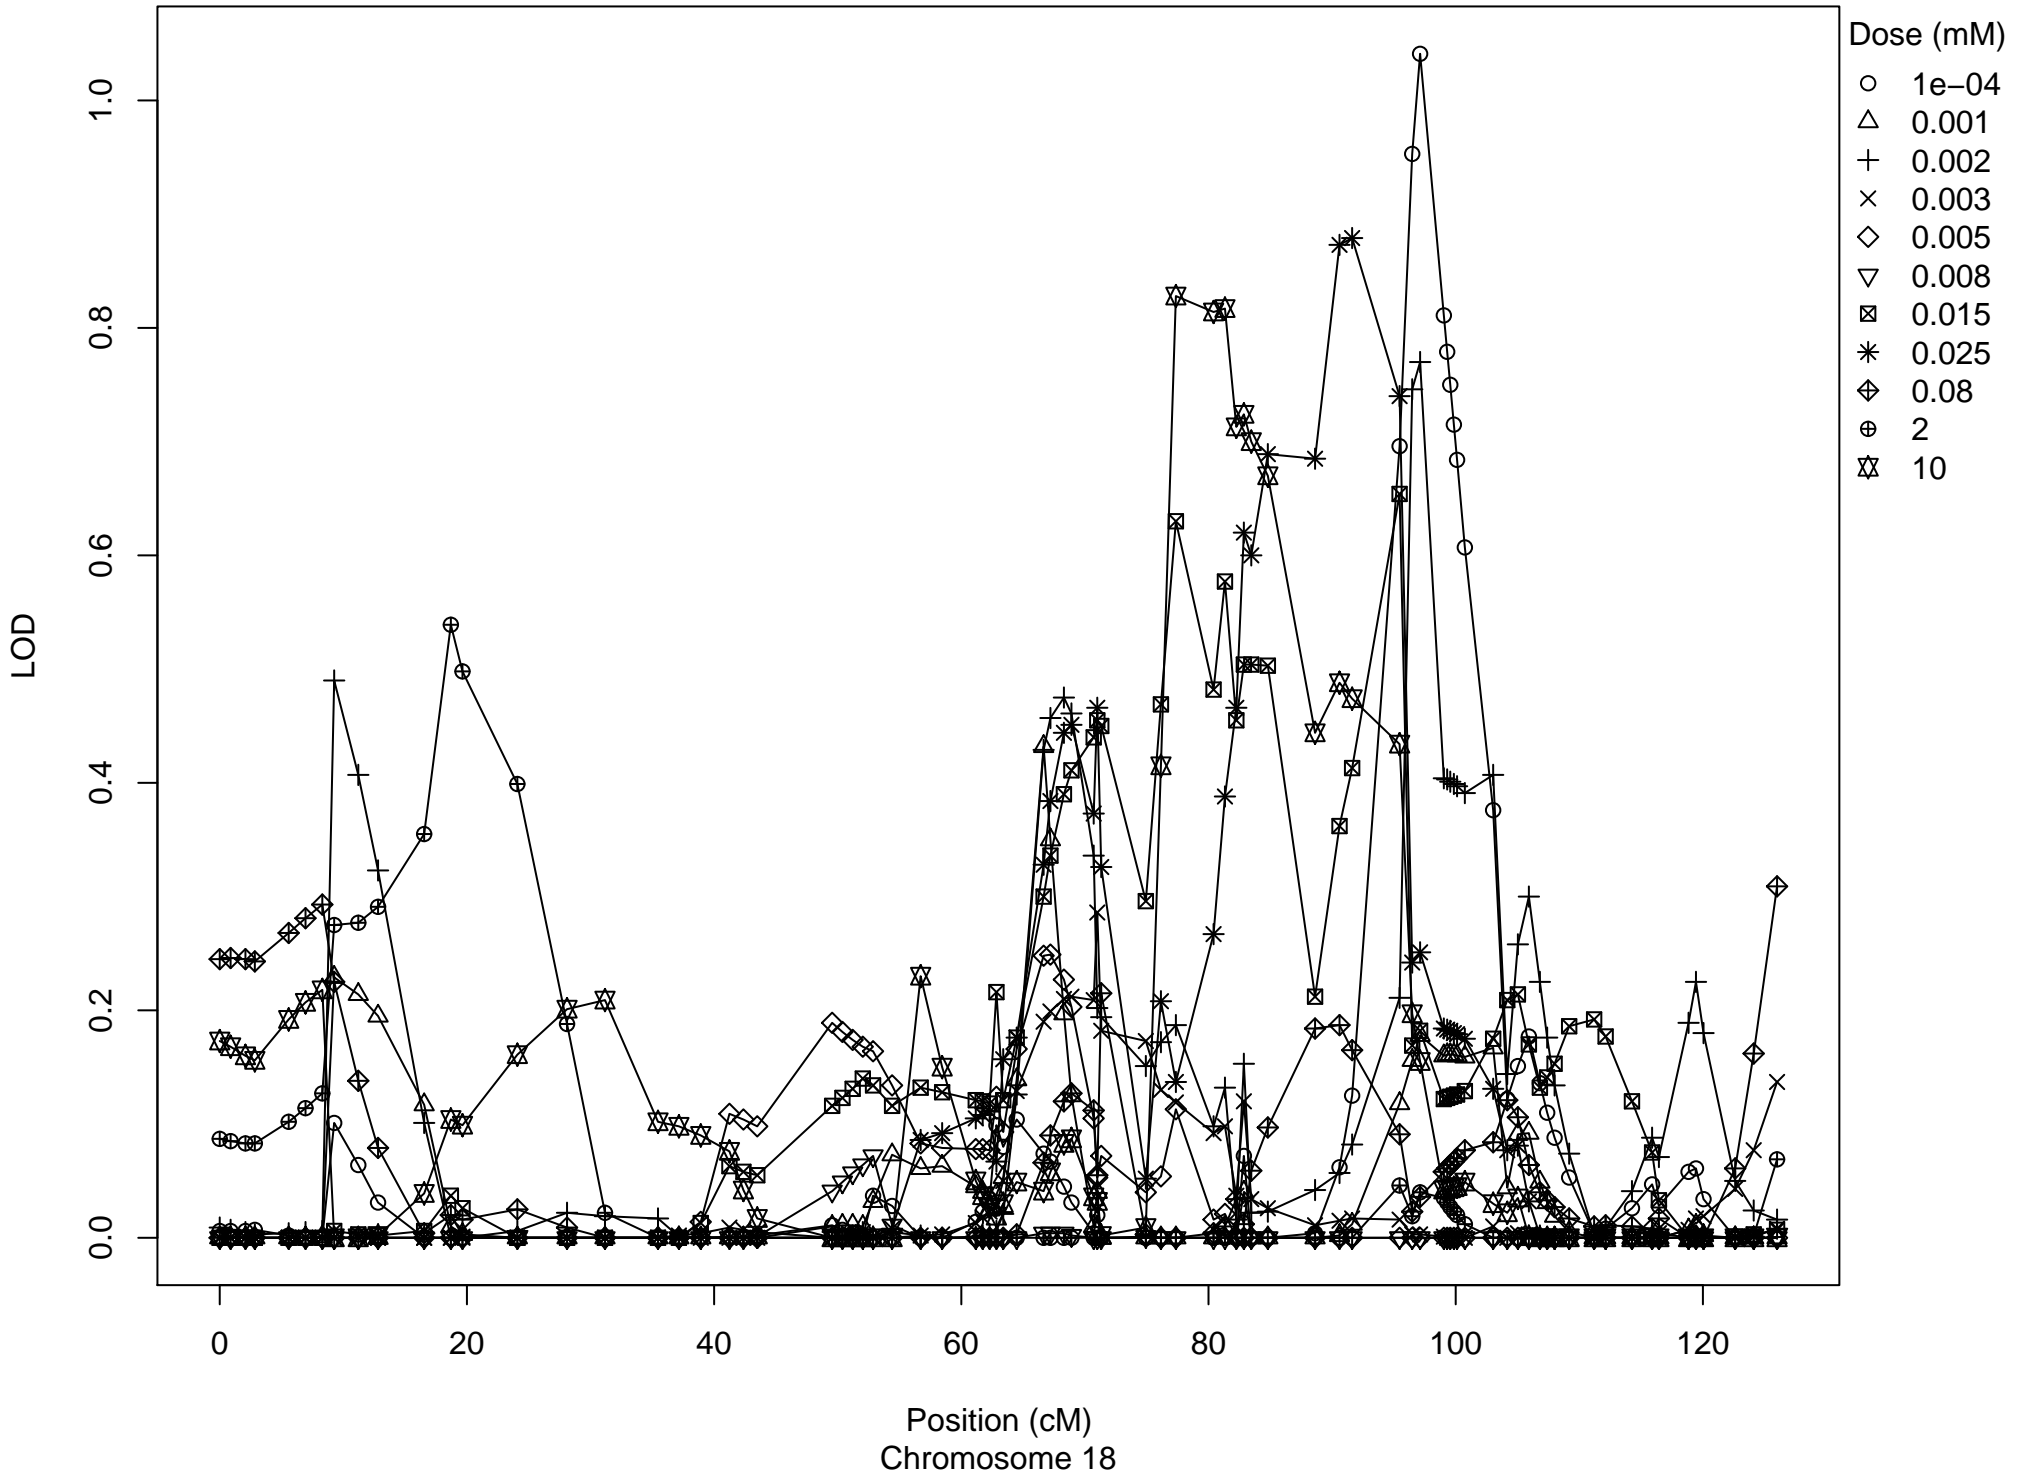



# 10-methoxy-camptothecin (mCPT)

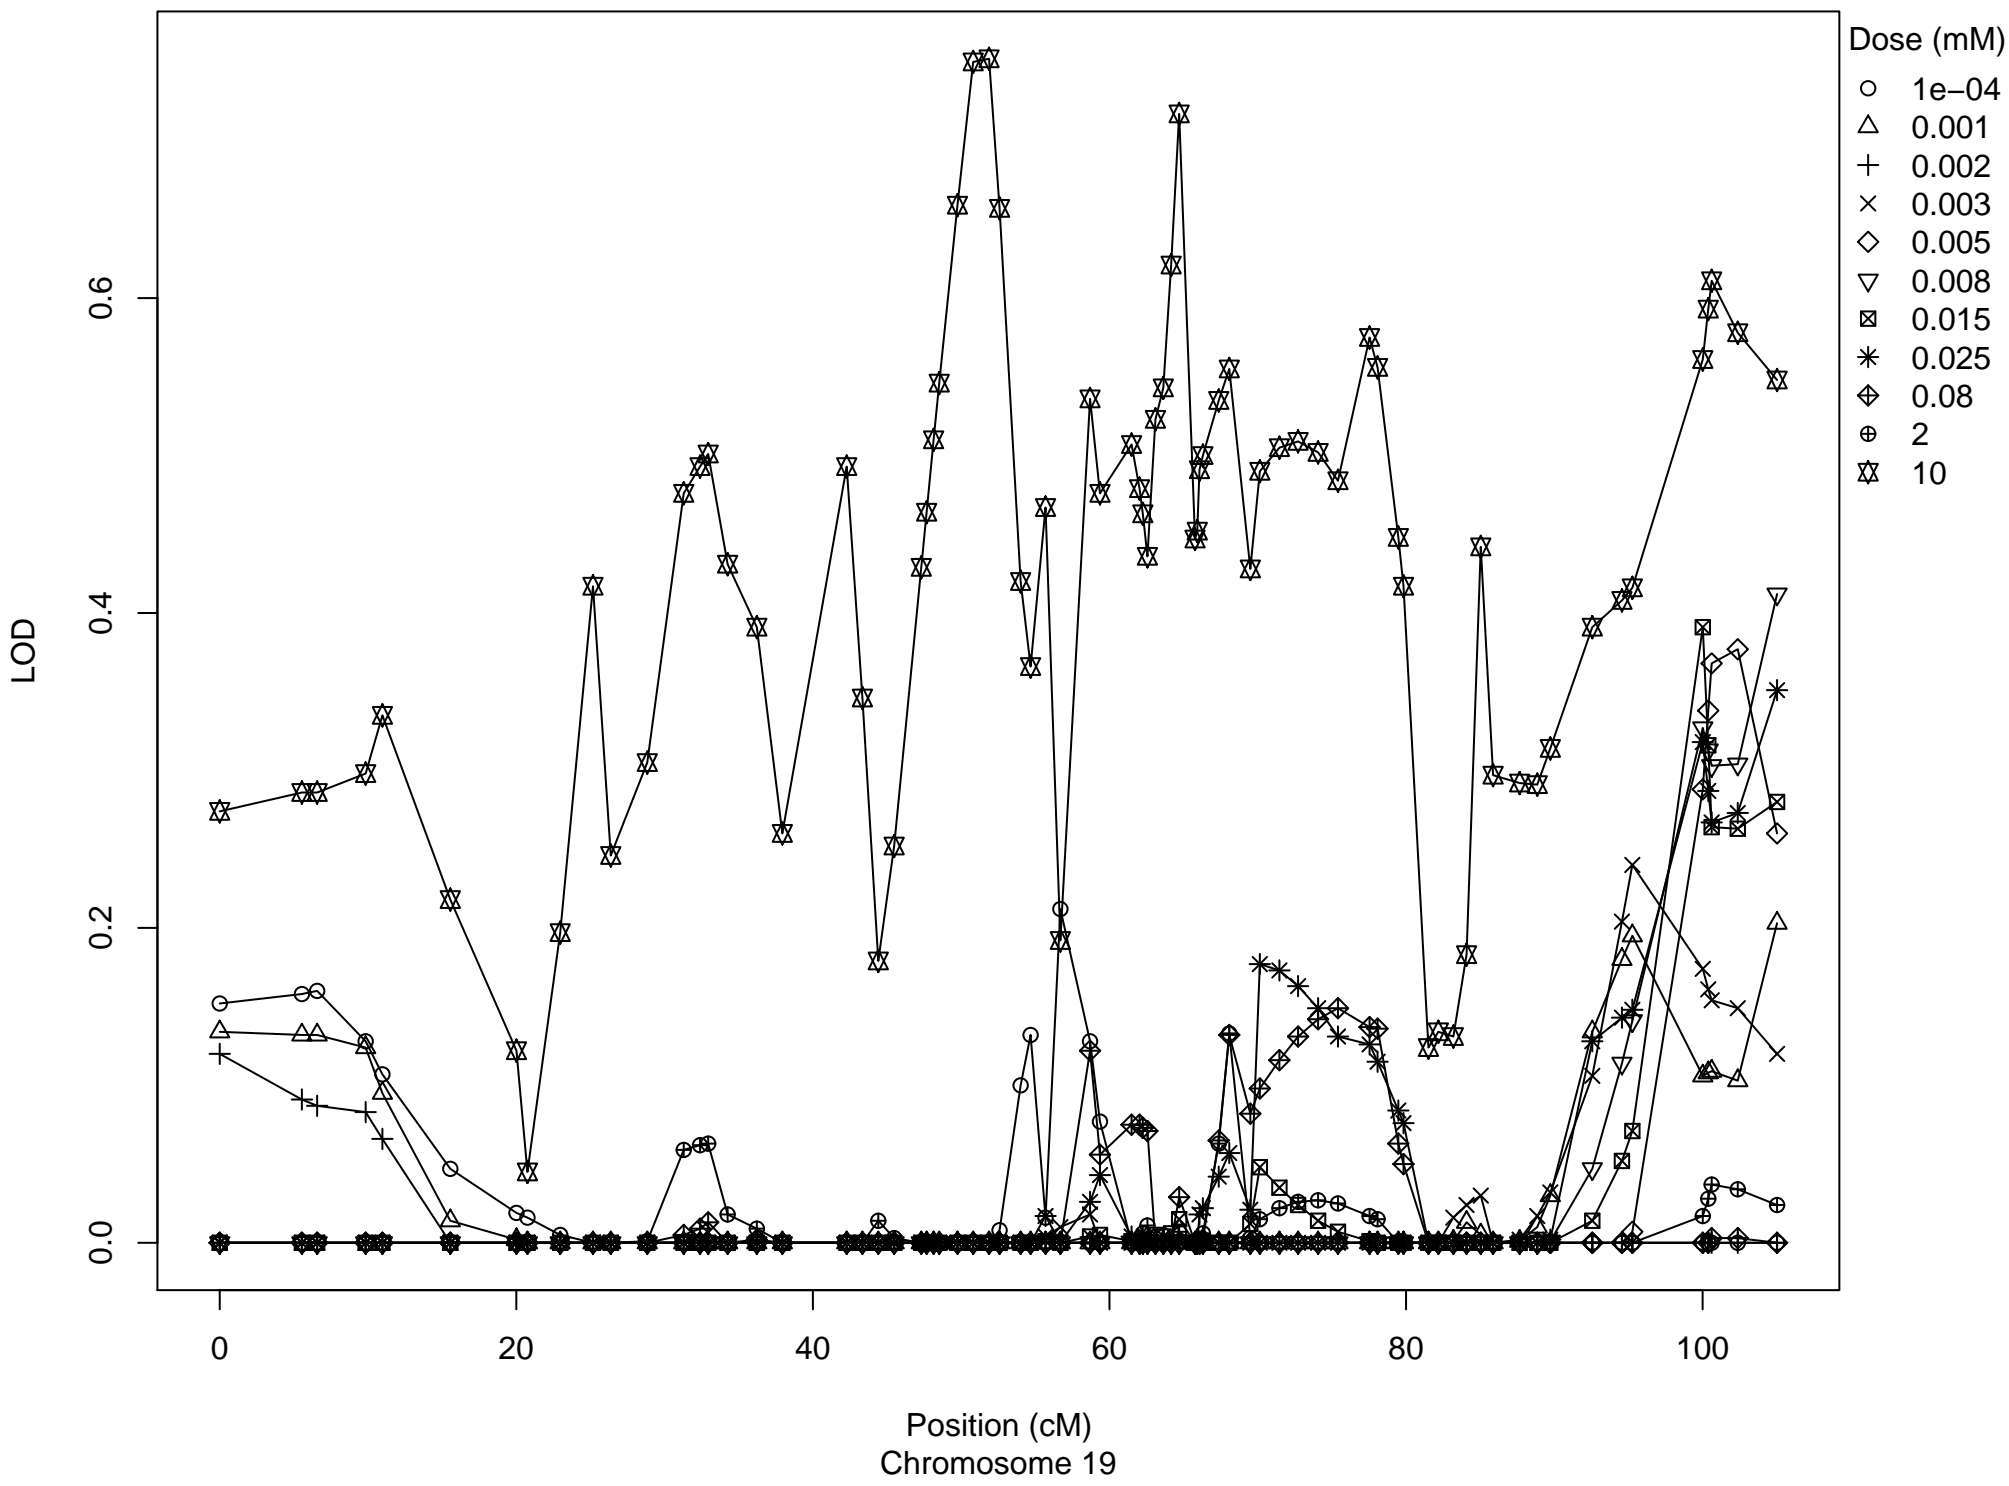

# 10-methoxy-camptothecin (mCPT)

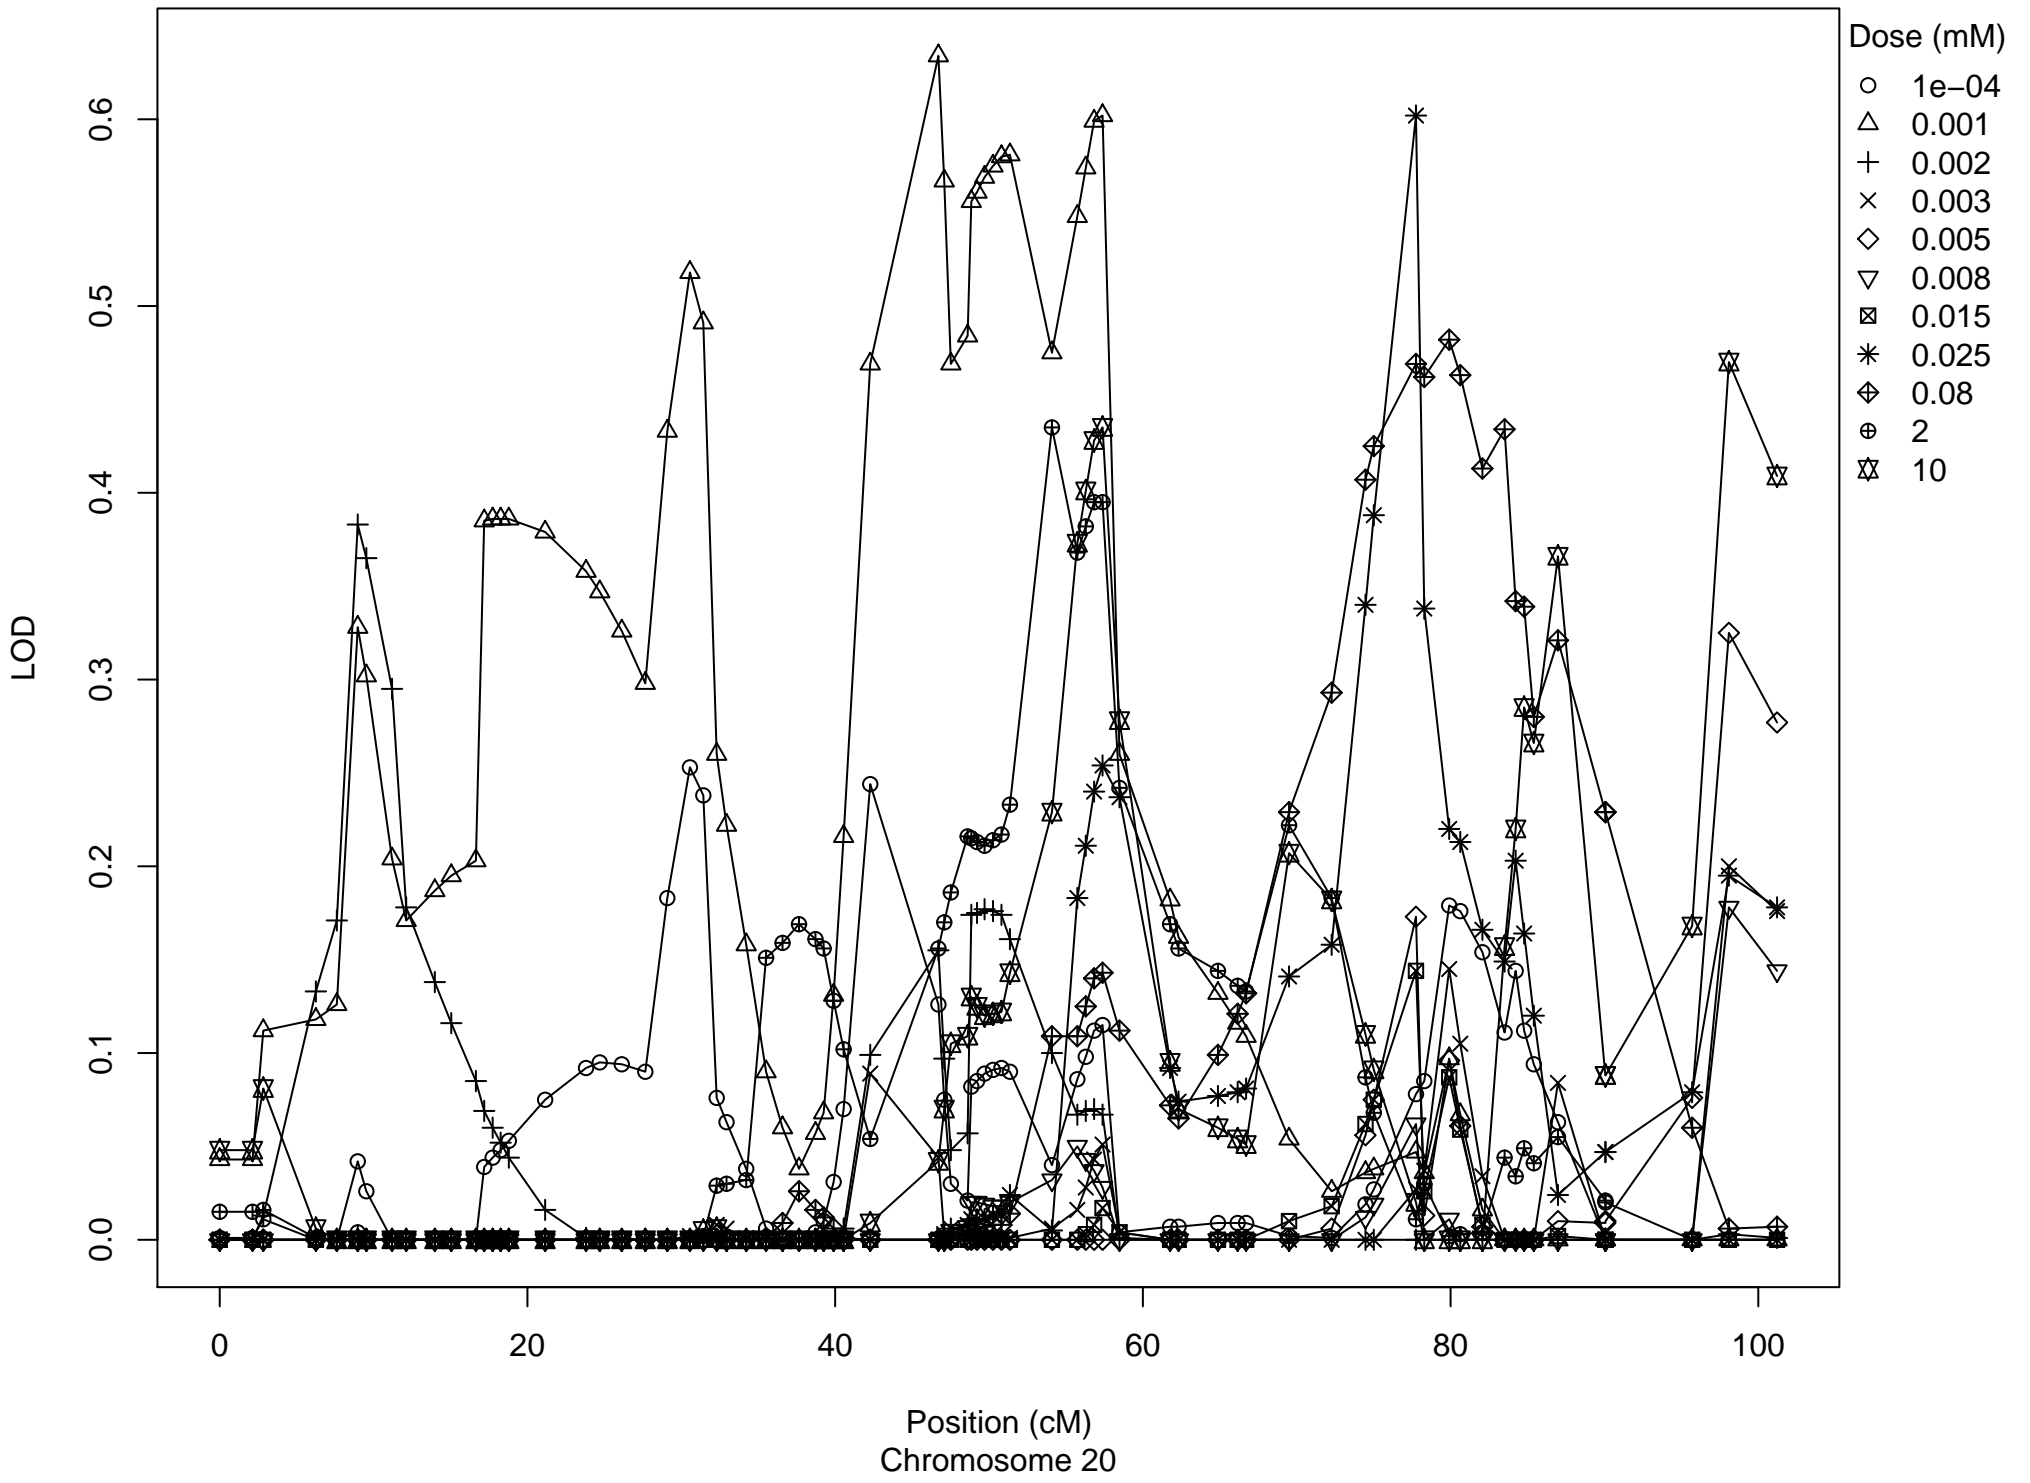



# 10-methoxy-camptothecin (mCPT)

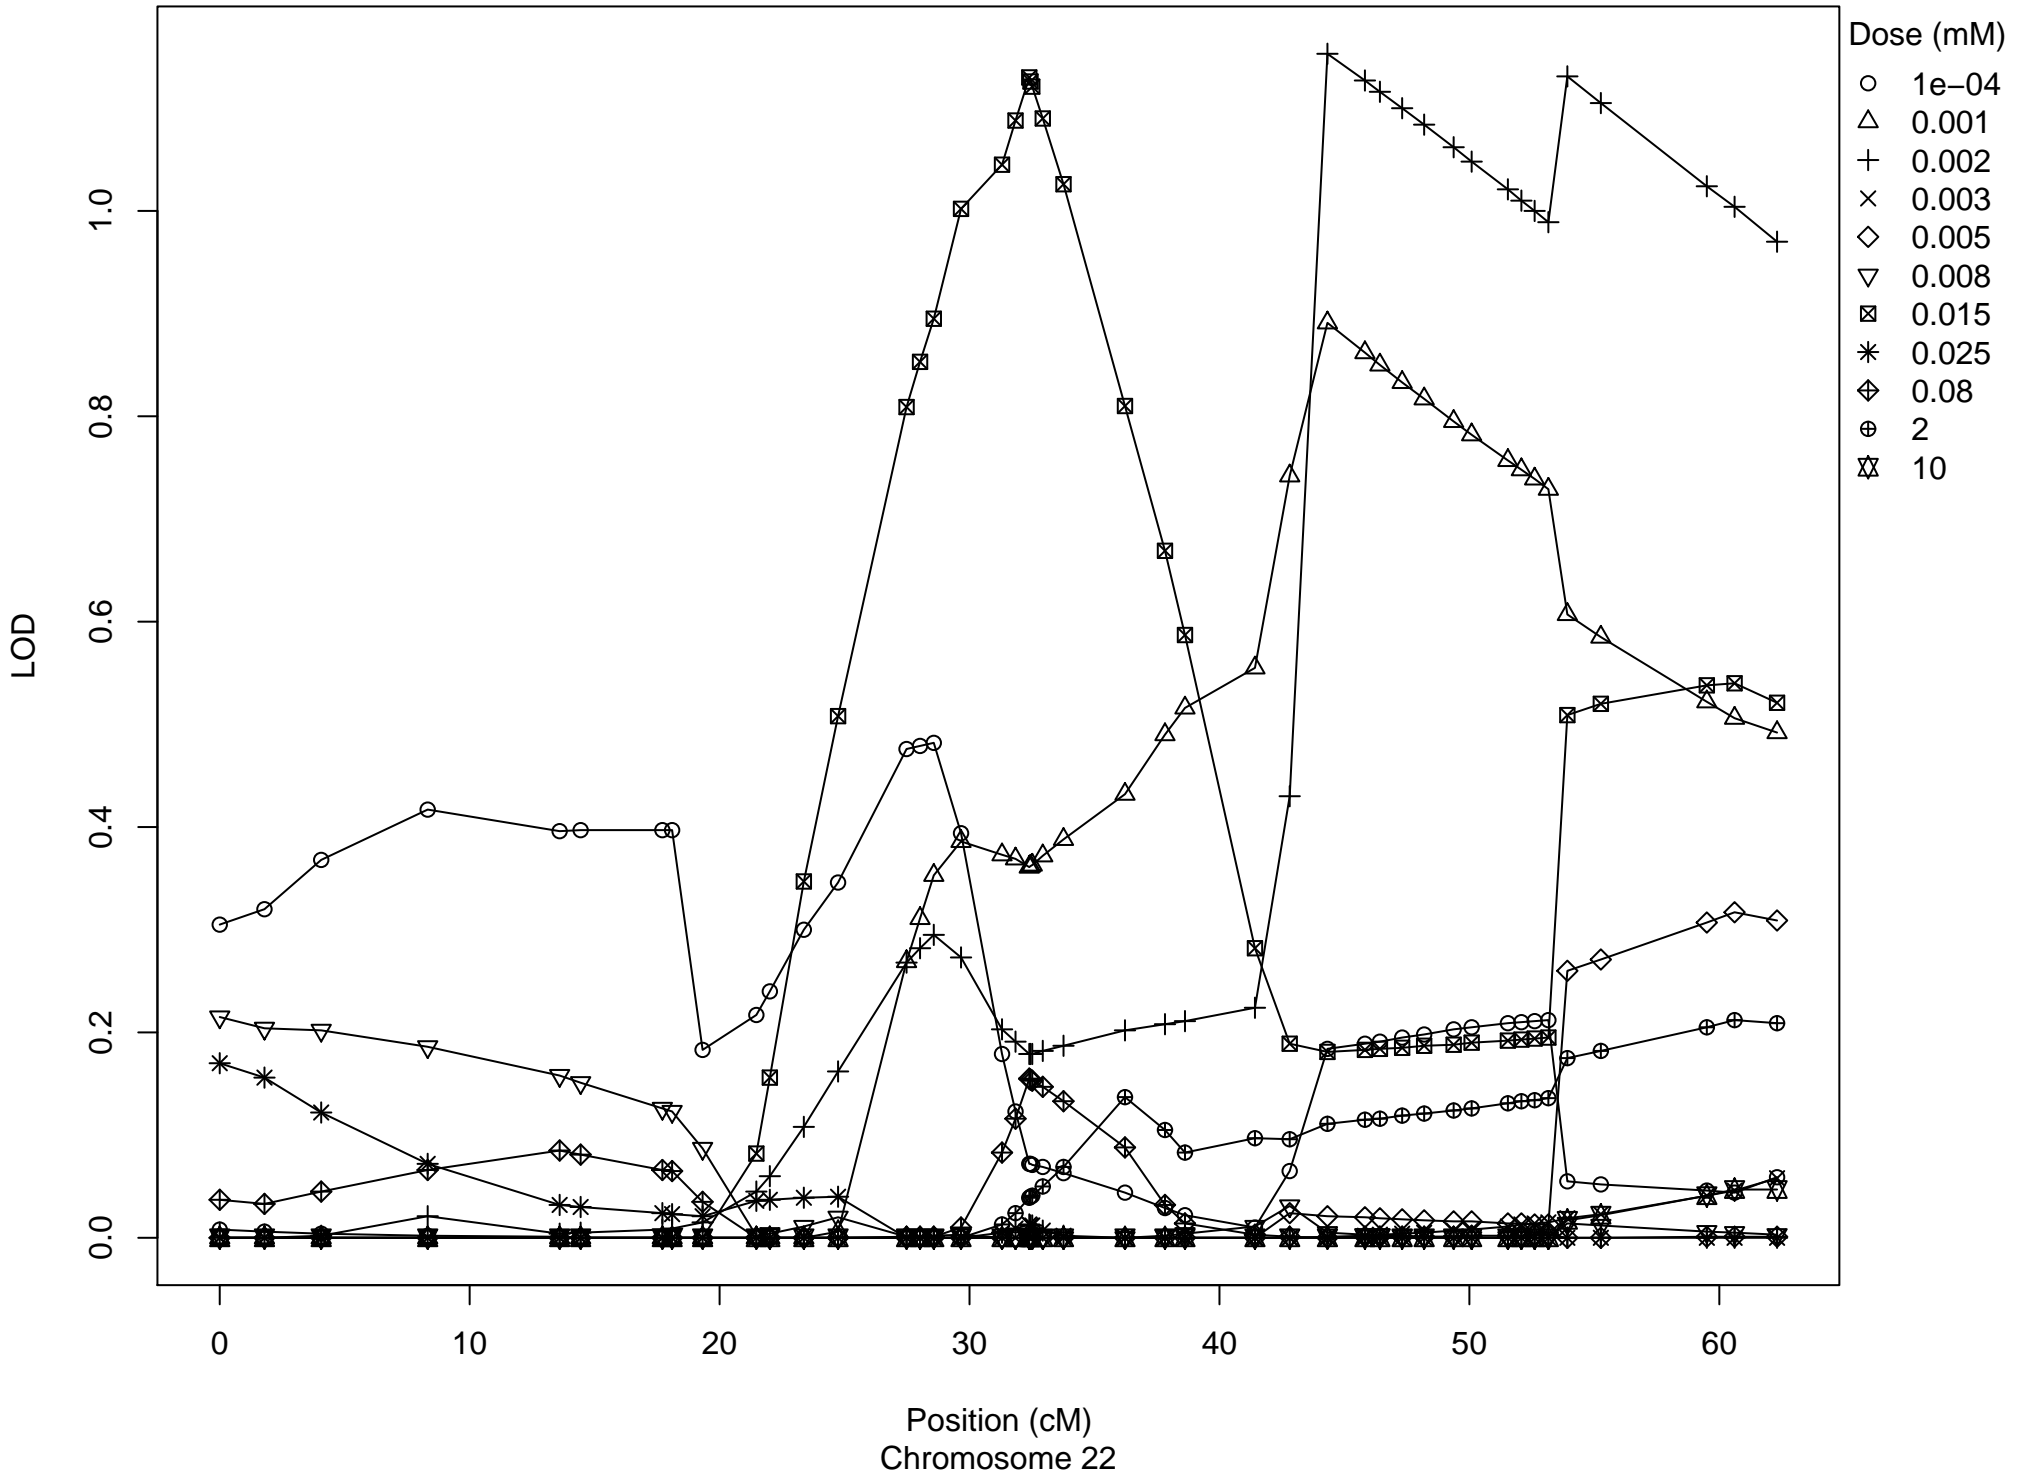

Supplement: pone.0017561.s011.pdf [file pone.0017561.s011.pdf]
