# Supplementary material for: Identification and Replication of Loci Involved in Camptothecin-Induced Cytotoxicity Using CEPH Pedigrees
Source: PubMed Central journal article supplement (PMC3088663; doi:10.1371/journal.pone.0017561), 2011-05-05

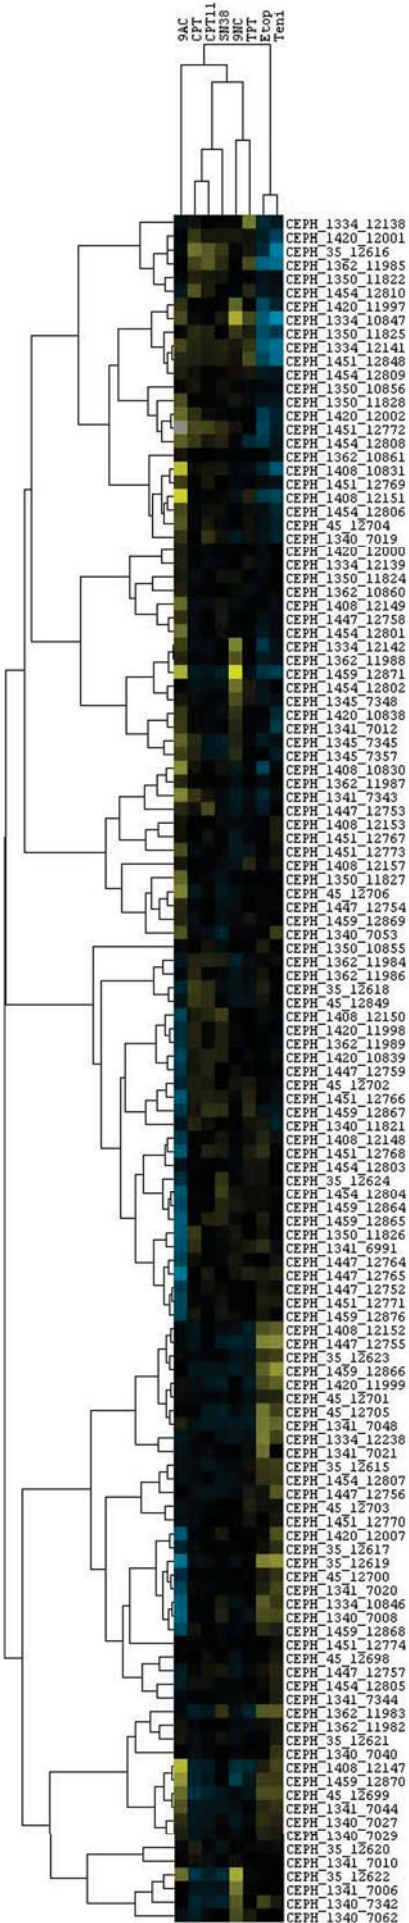

Supplement: pone.0017561.s003.pdf [file pone.0017561.s003.pdf]
