# Supplementary material for: Identification and Replication of Loci Involved in Camptothecin-Induced Cytotoxicity Using CEPH Pedigrees
Source: PubMed Central journal article supplement (PMC3088663; doi:10.1371/journal.pone.0017561), 2011-05-05

# Drug 9AC

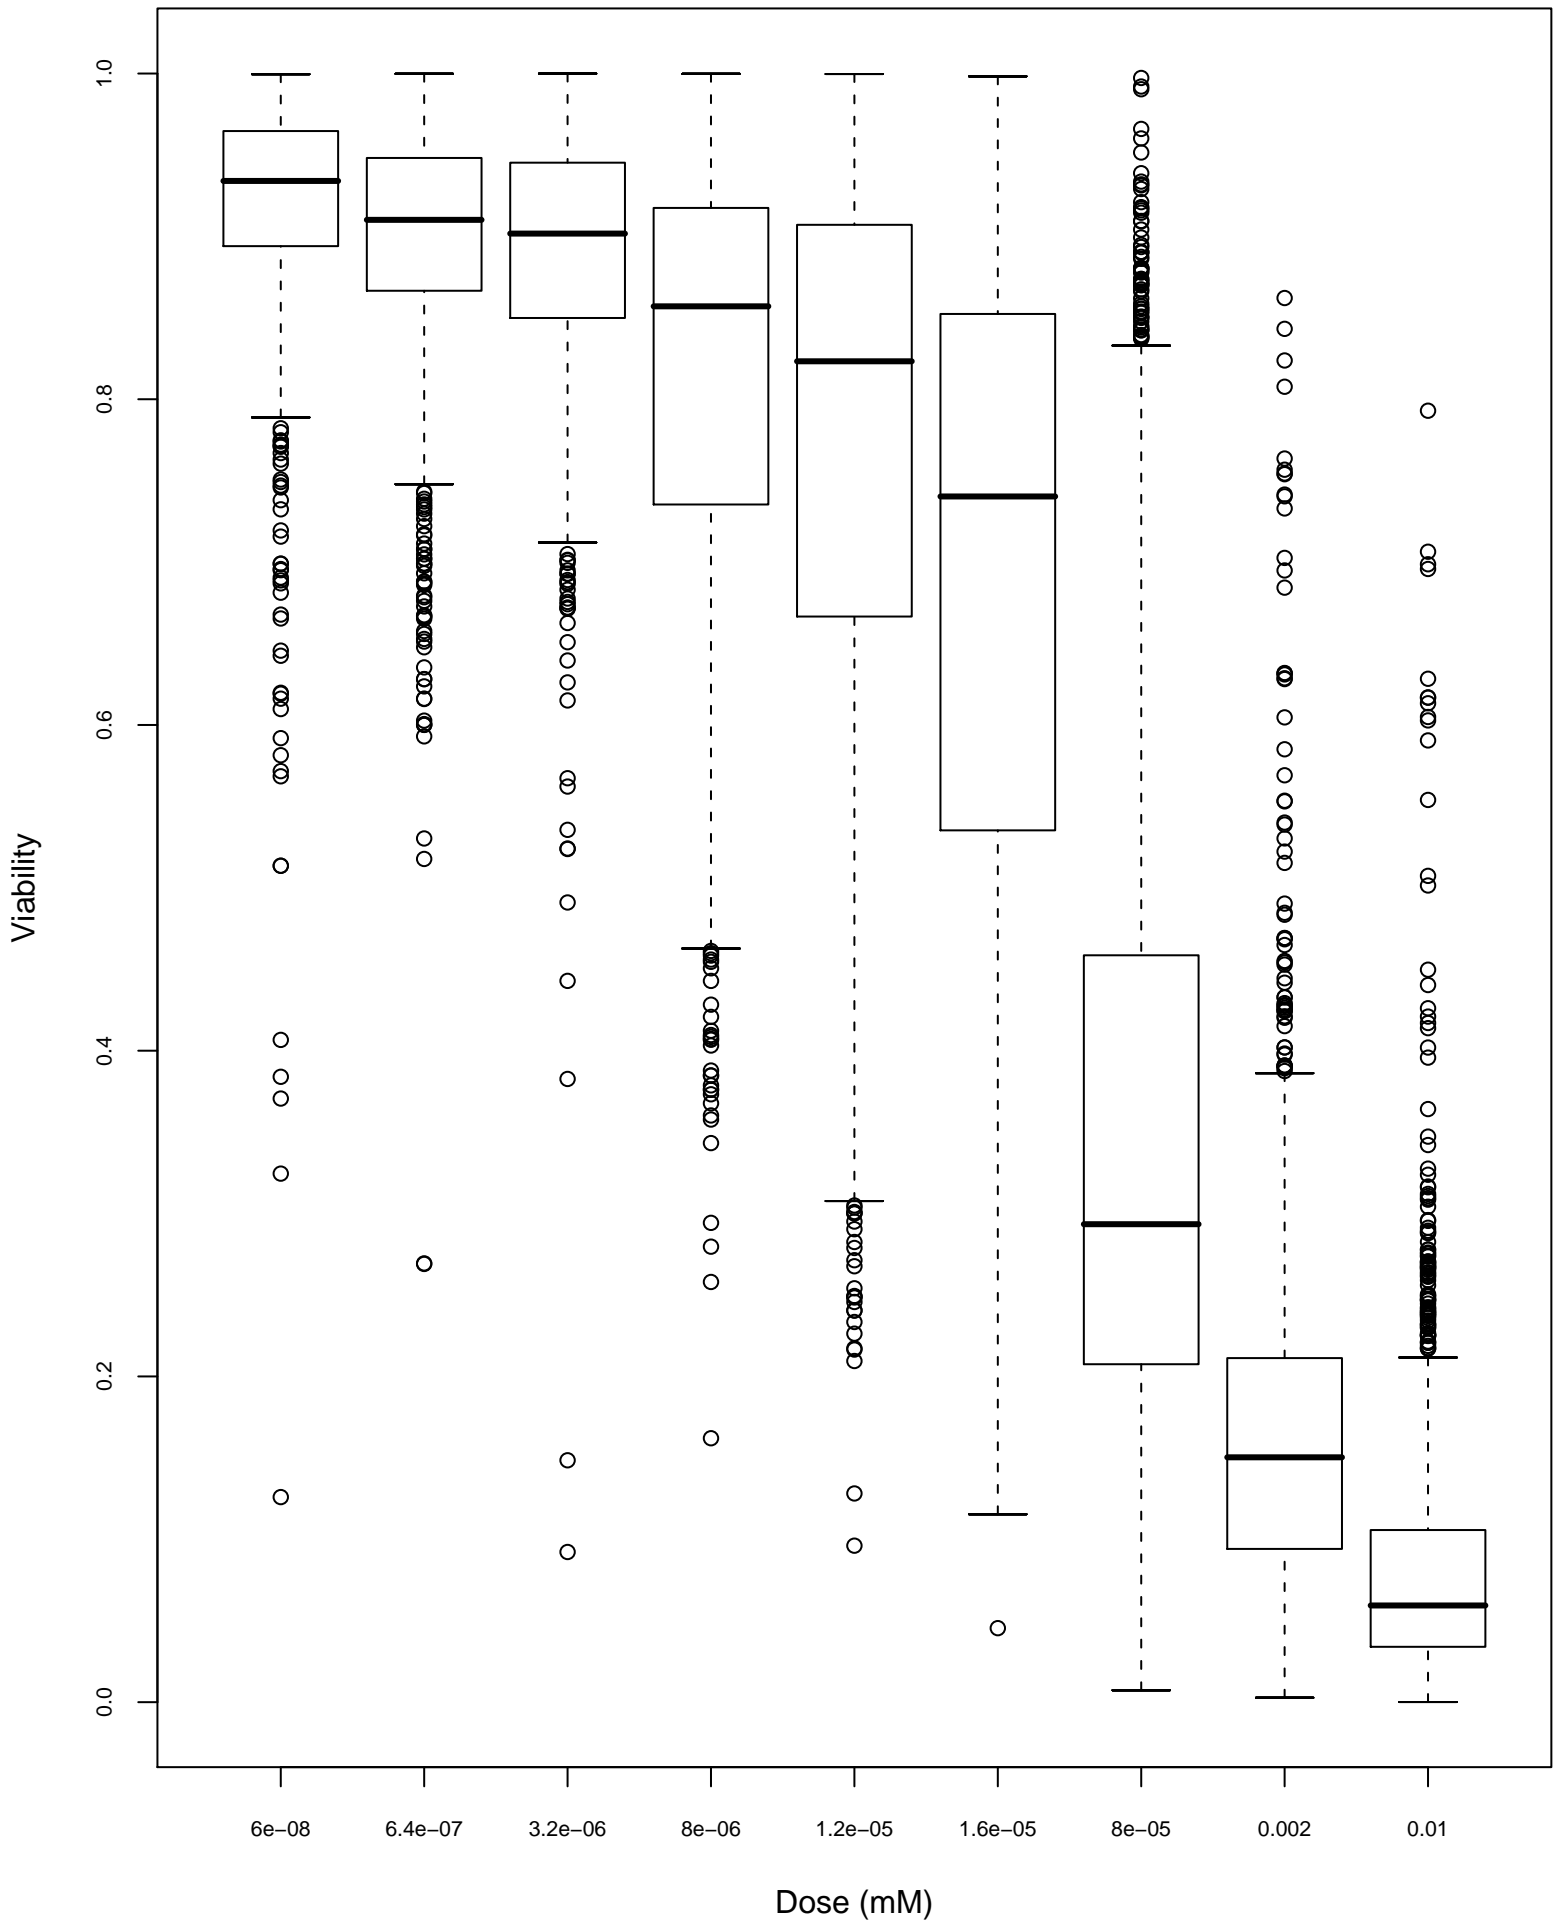

# Drug 9NC

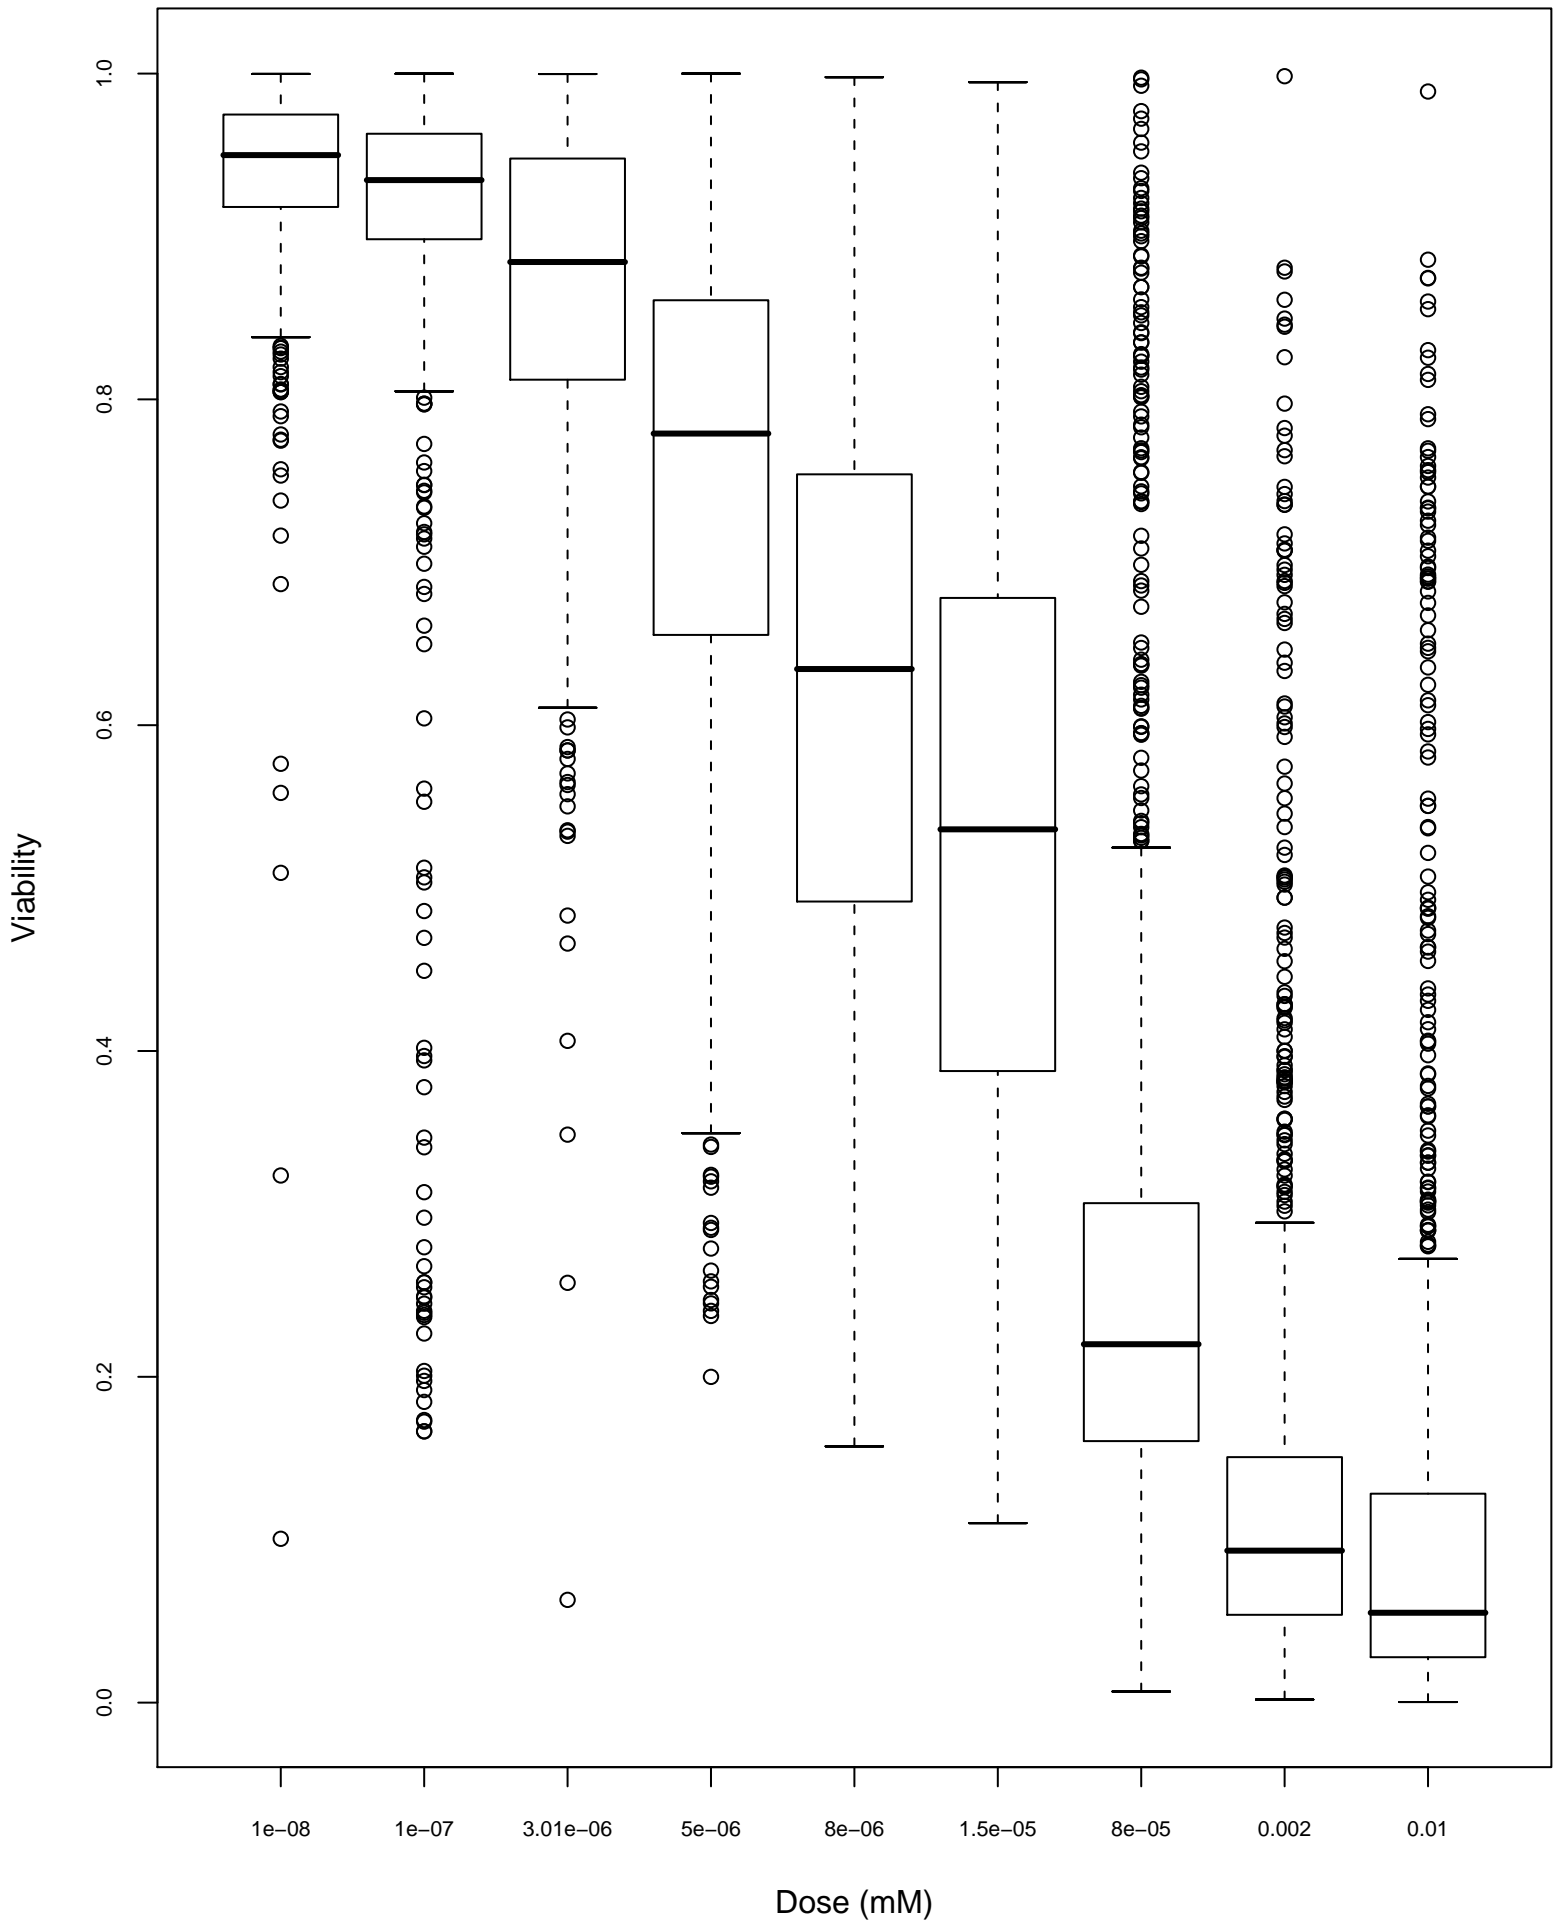

# Drug CPT

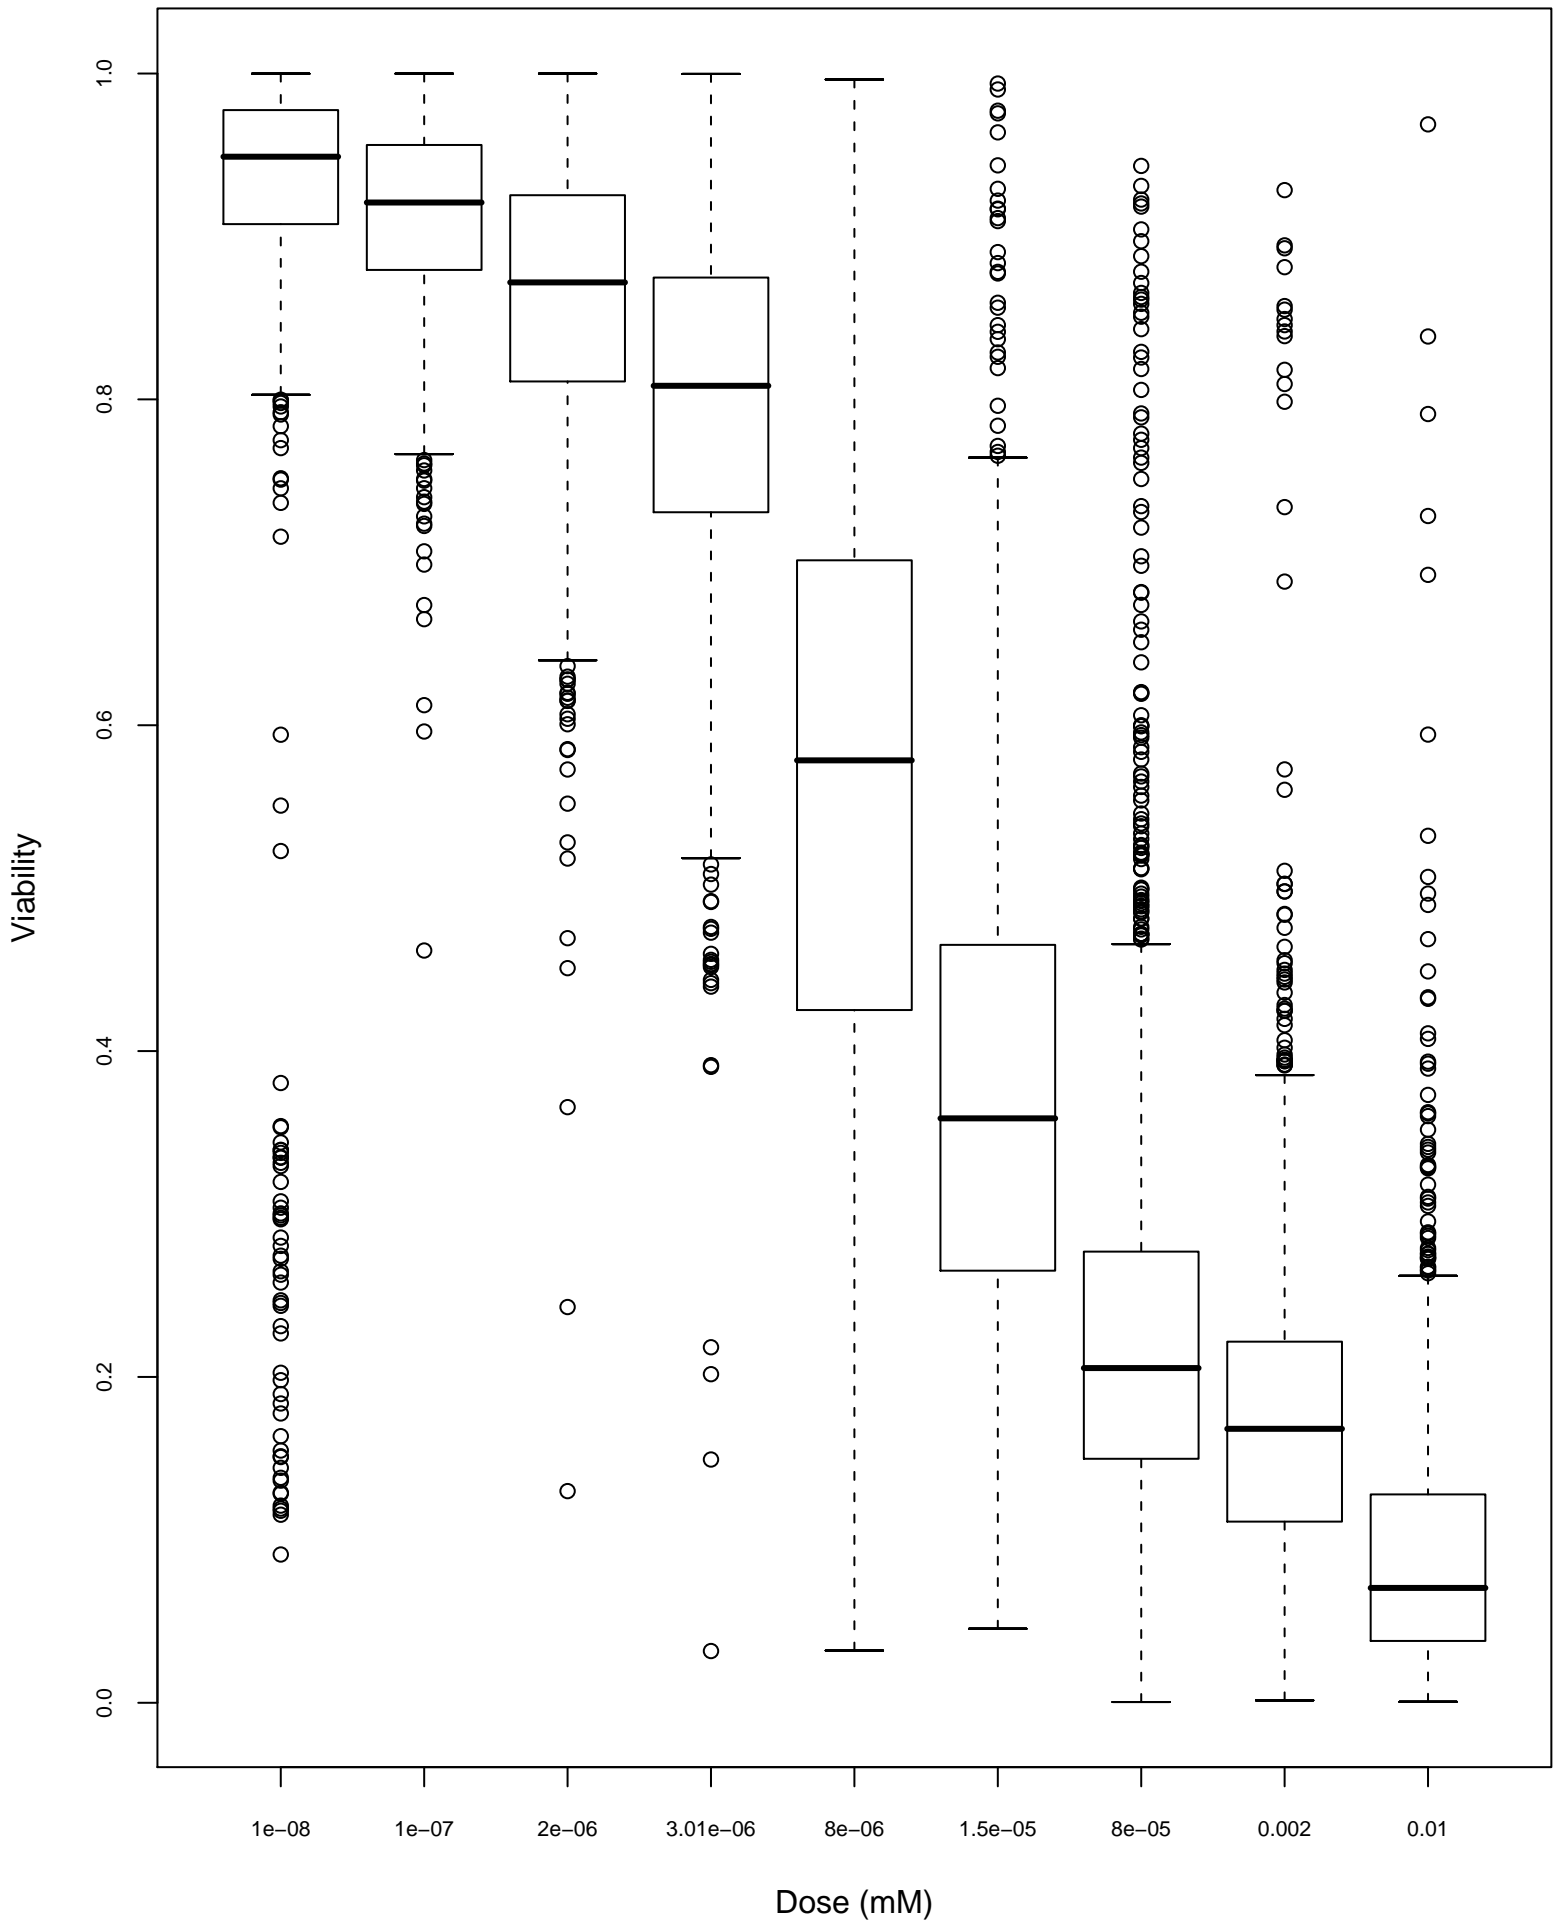

# Drug CPT11

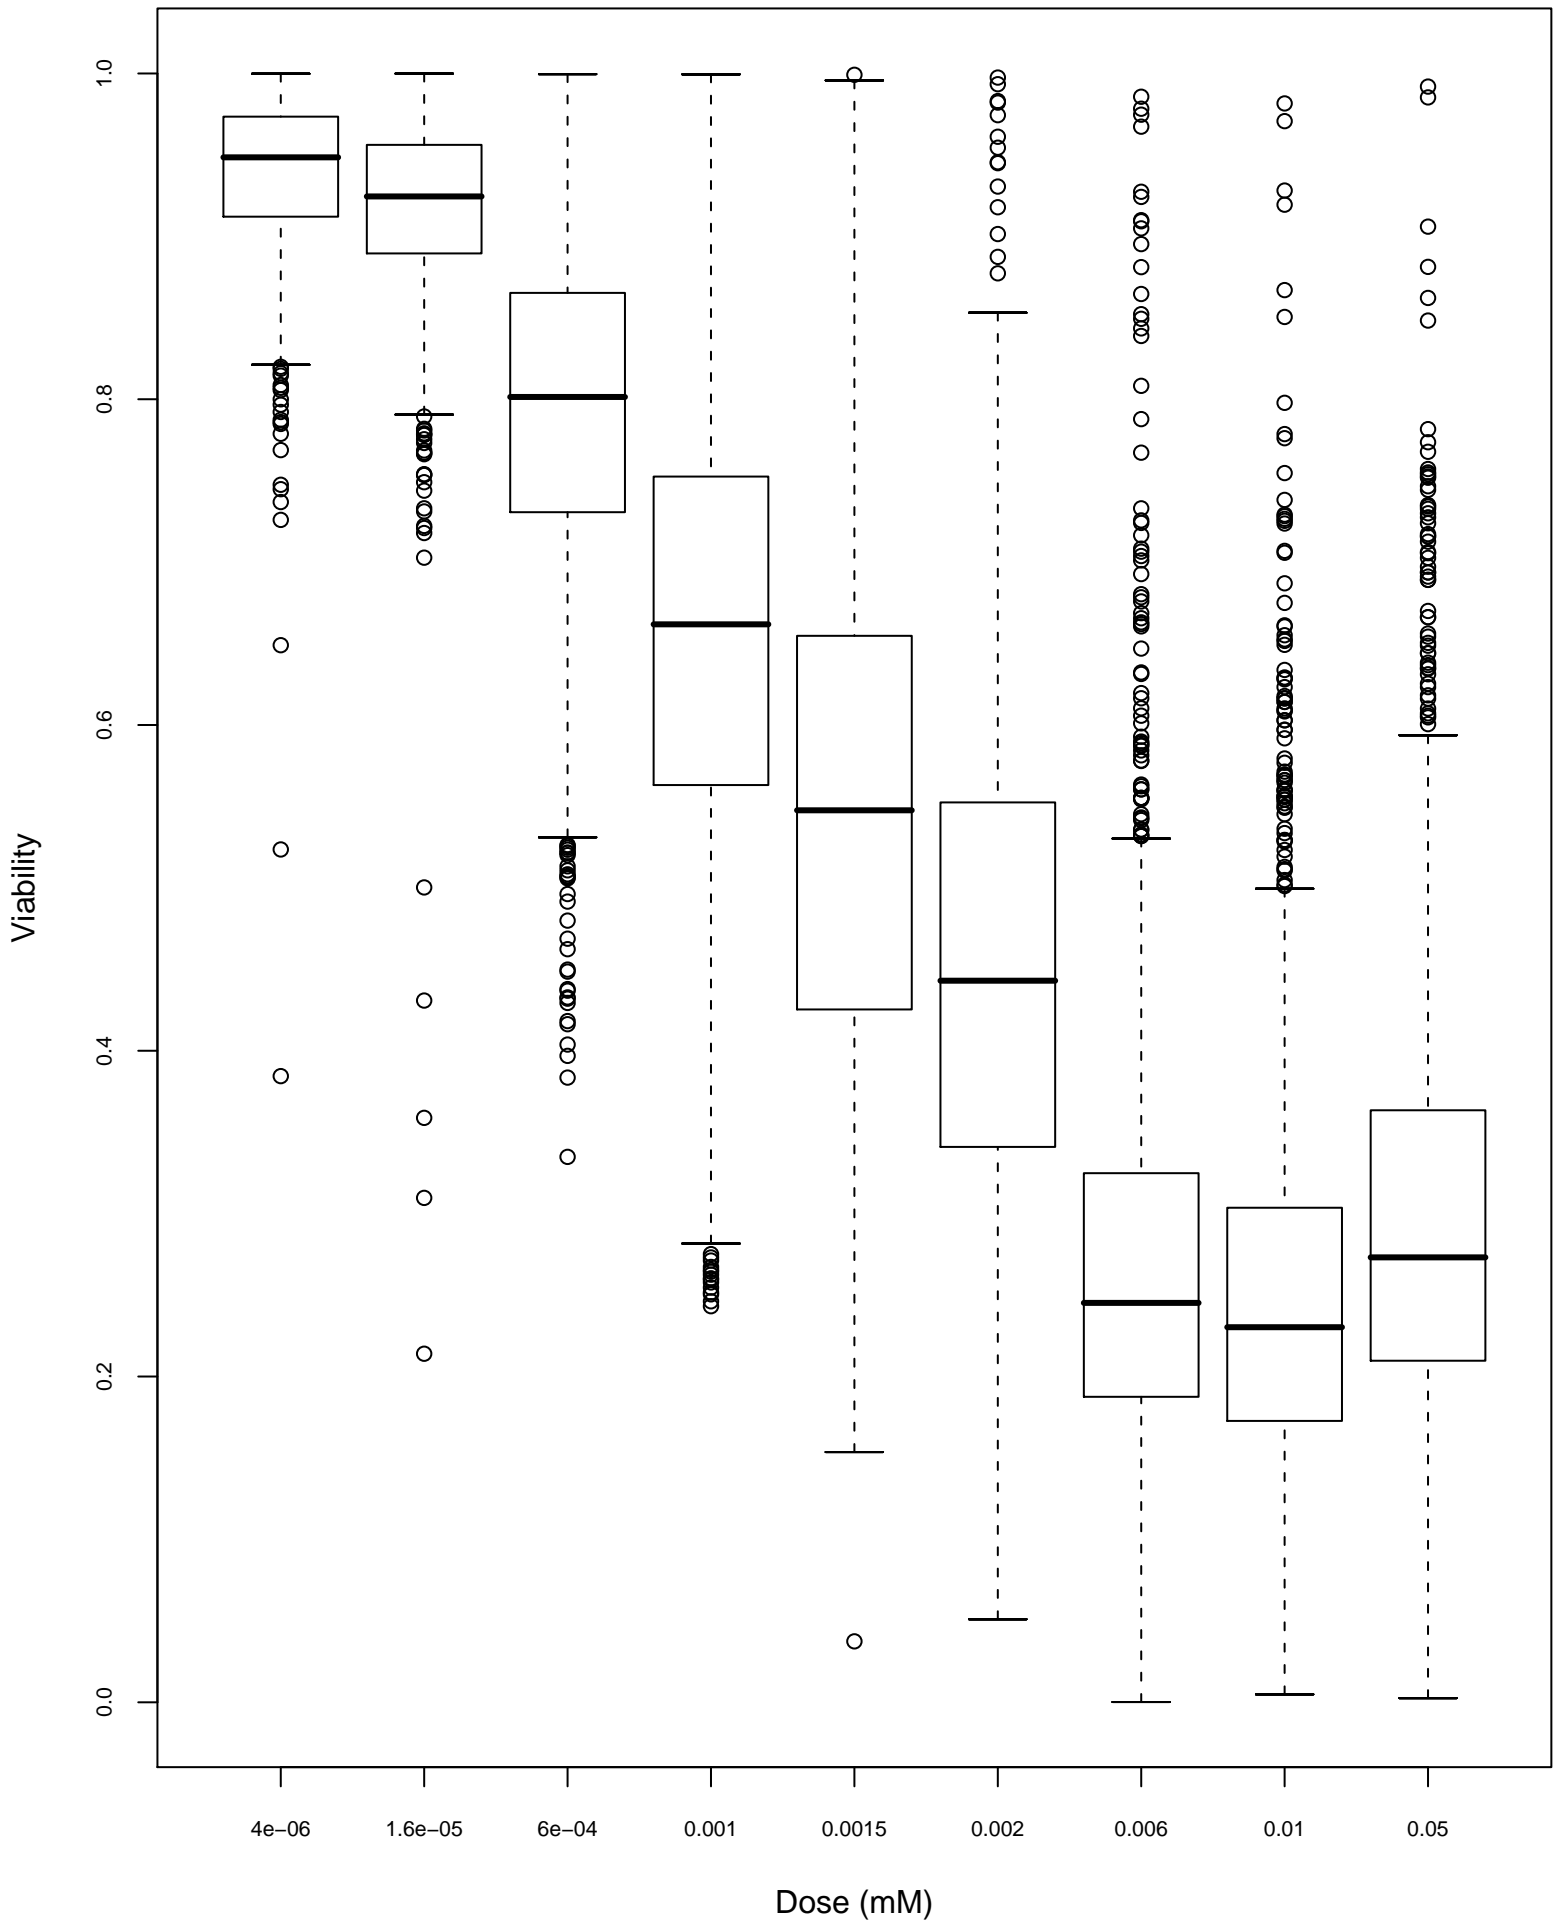

# Drug SN38

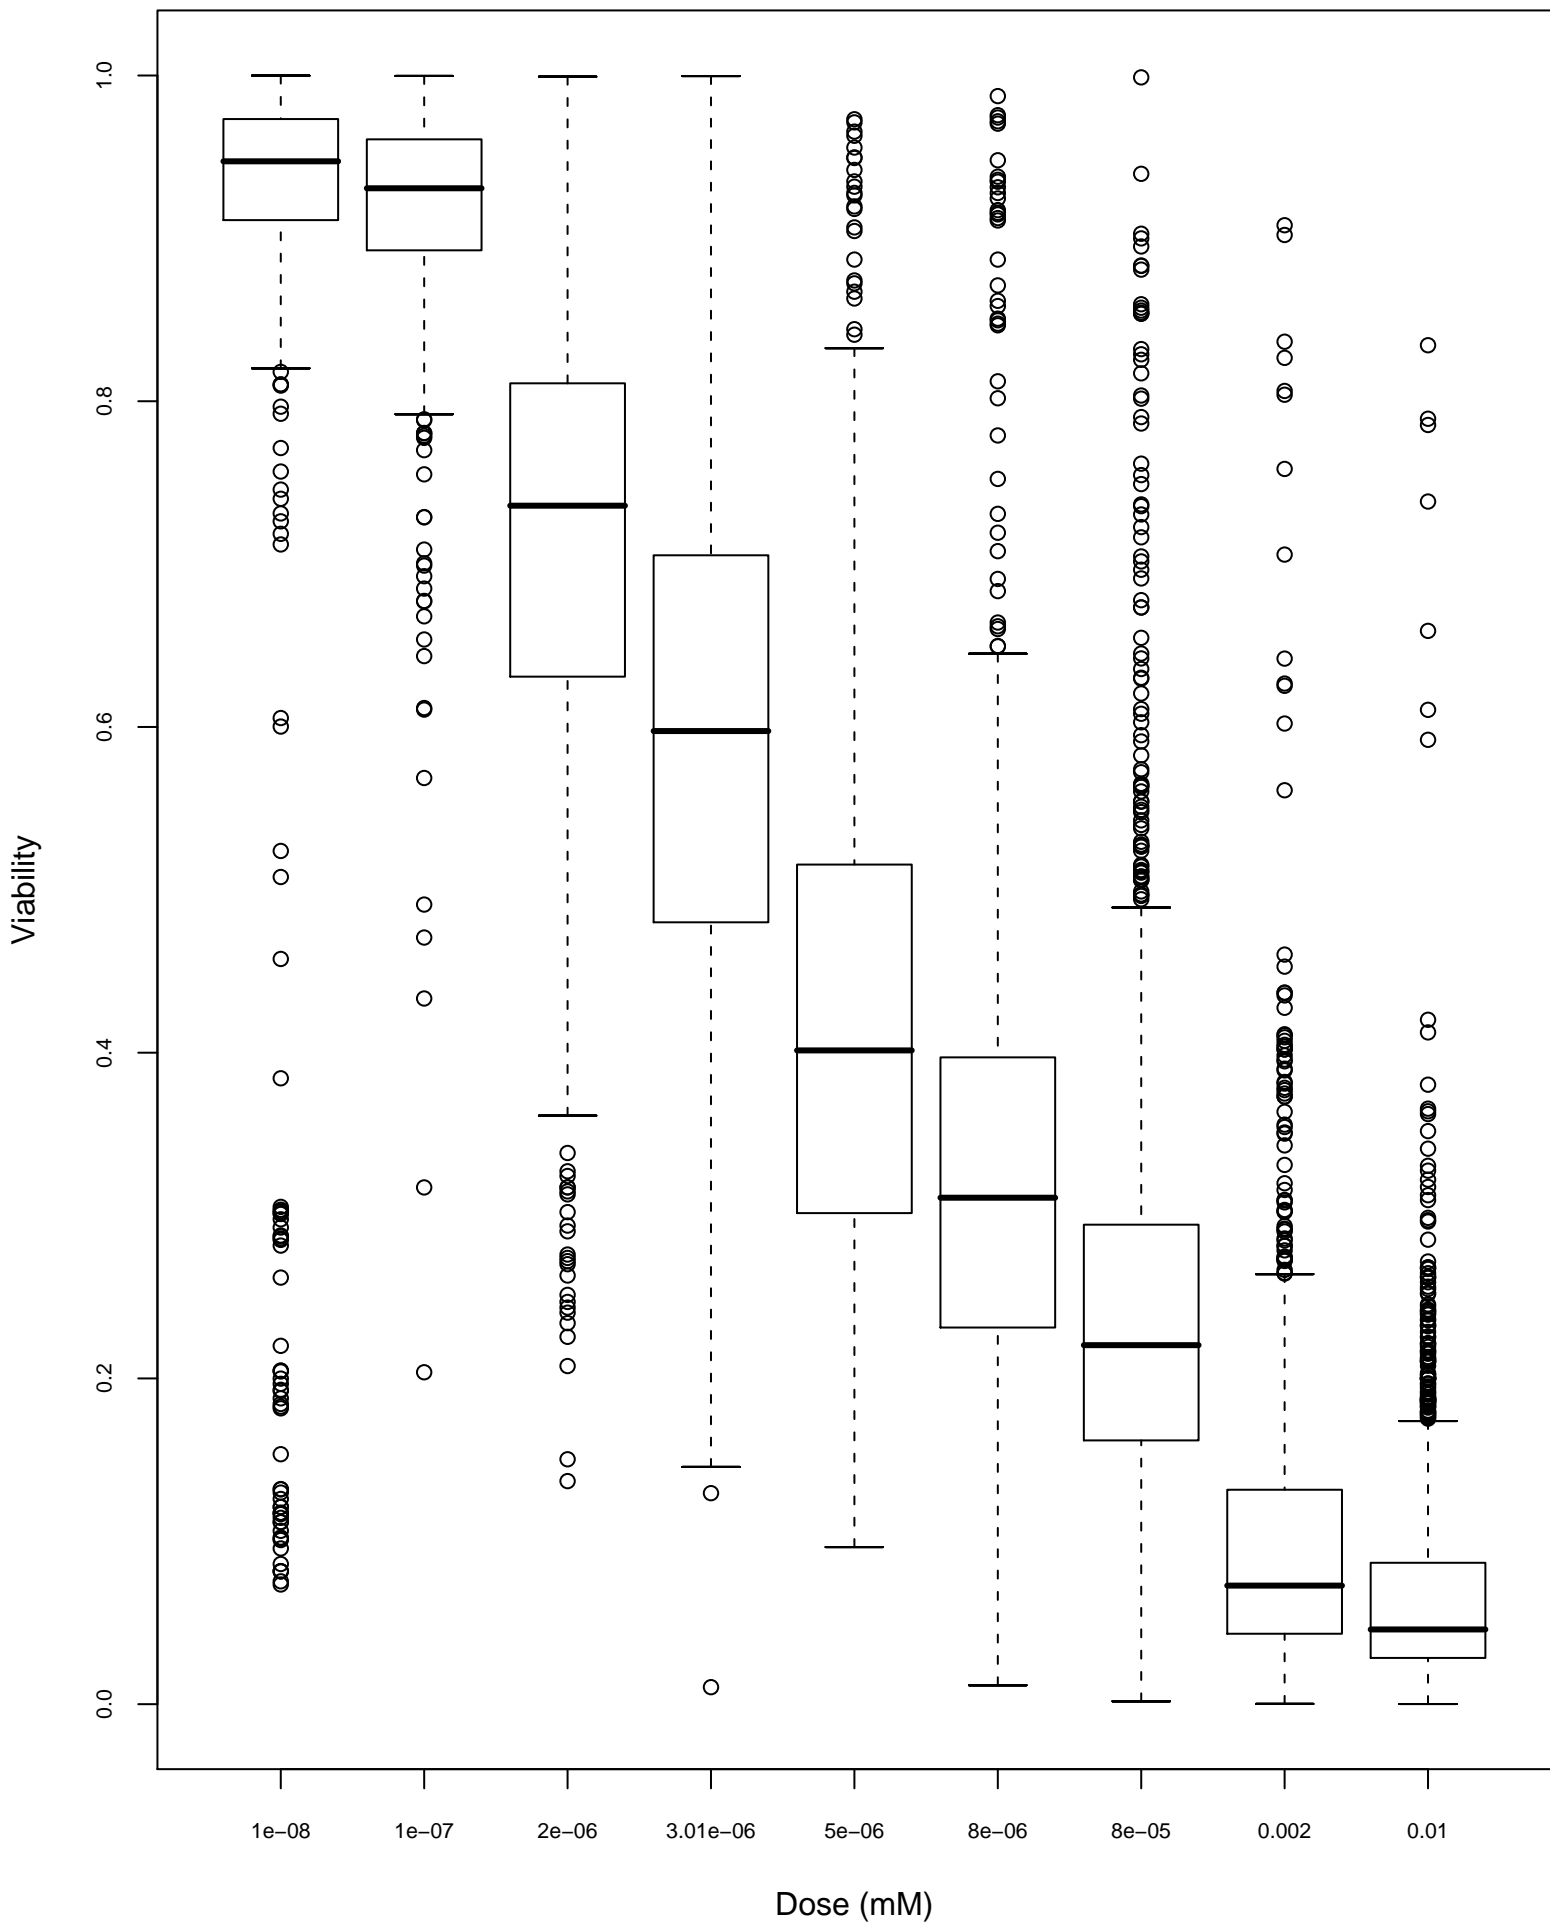

# Drug TPT

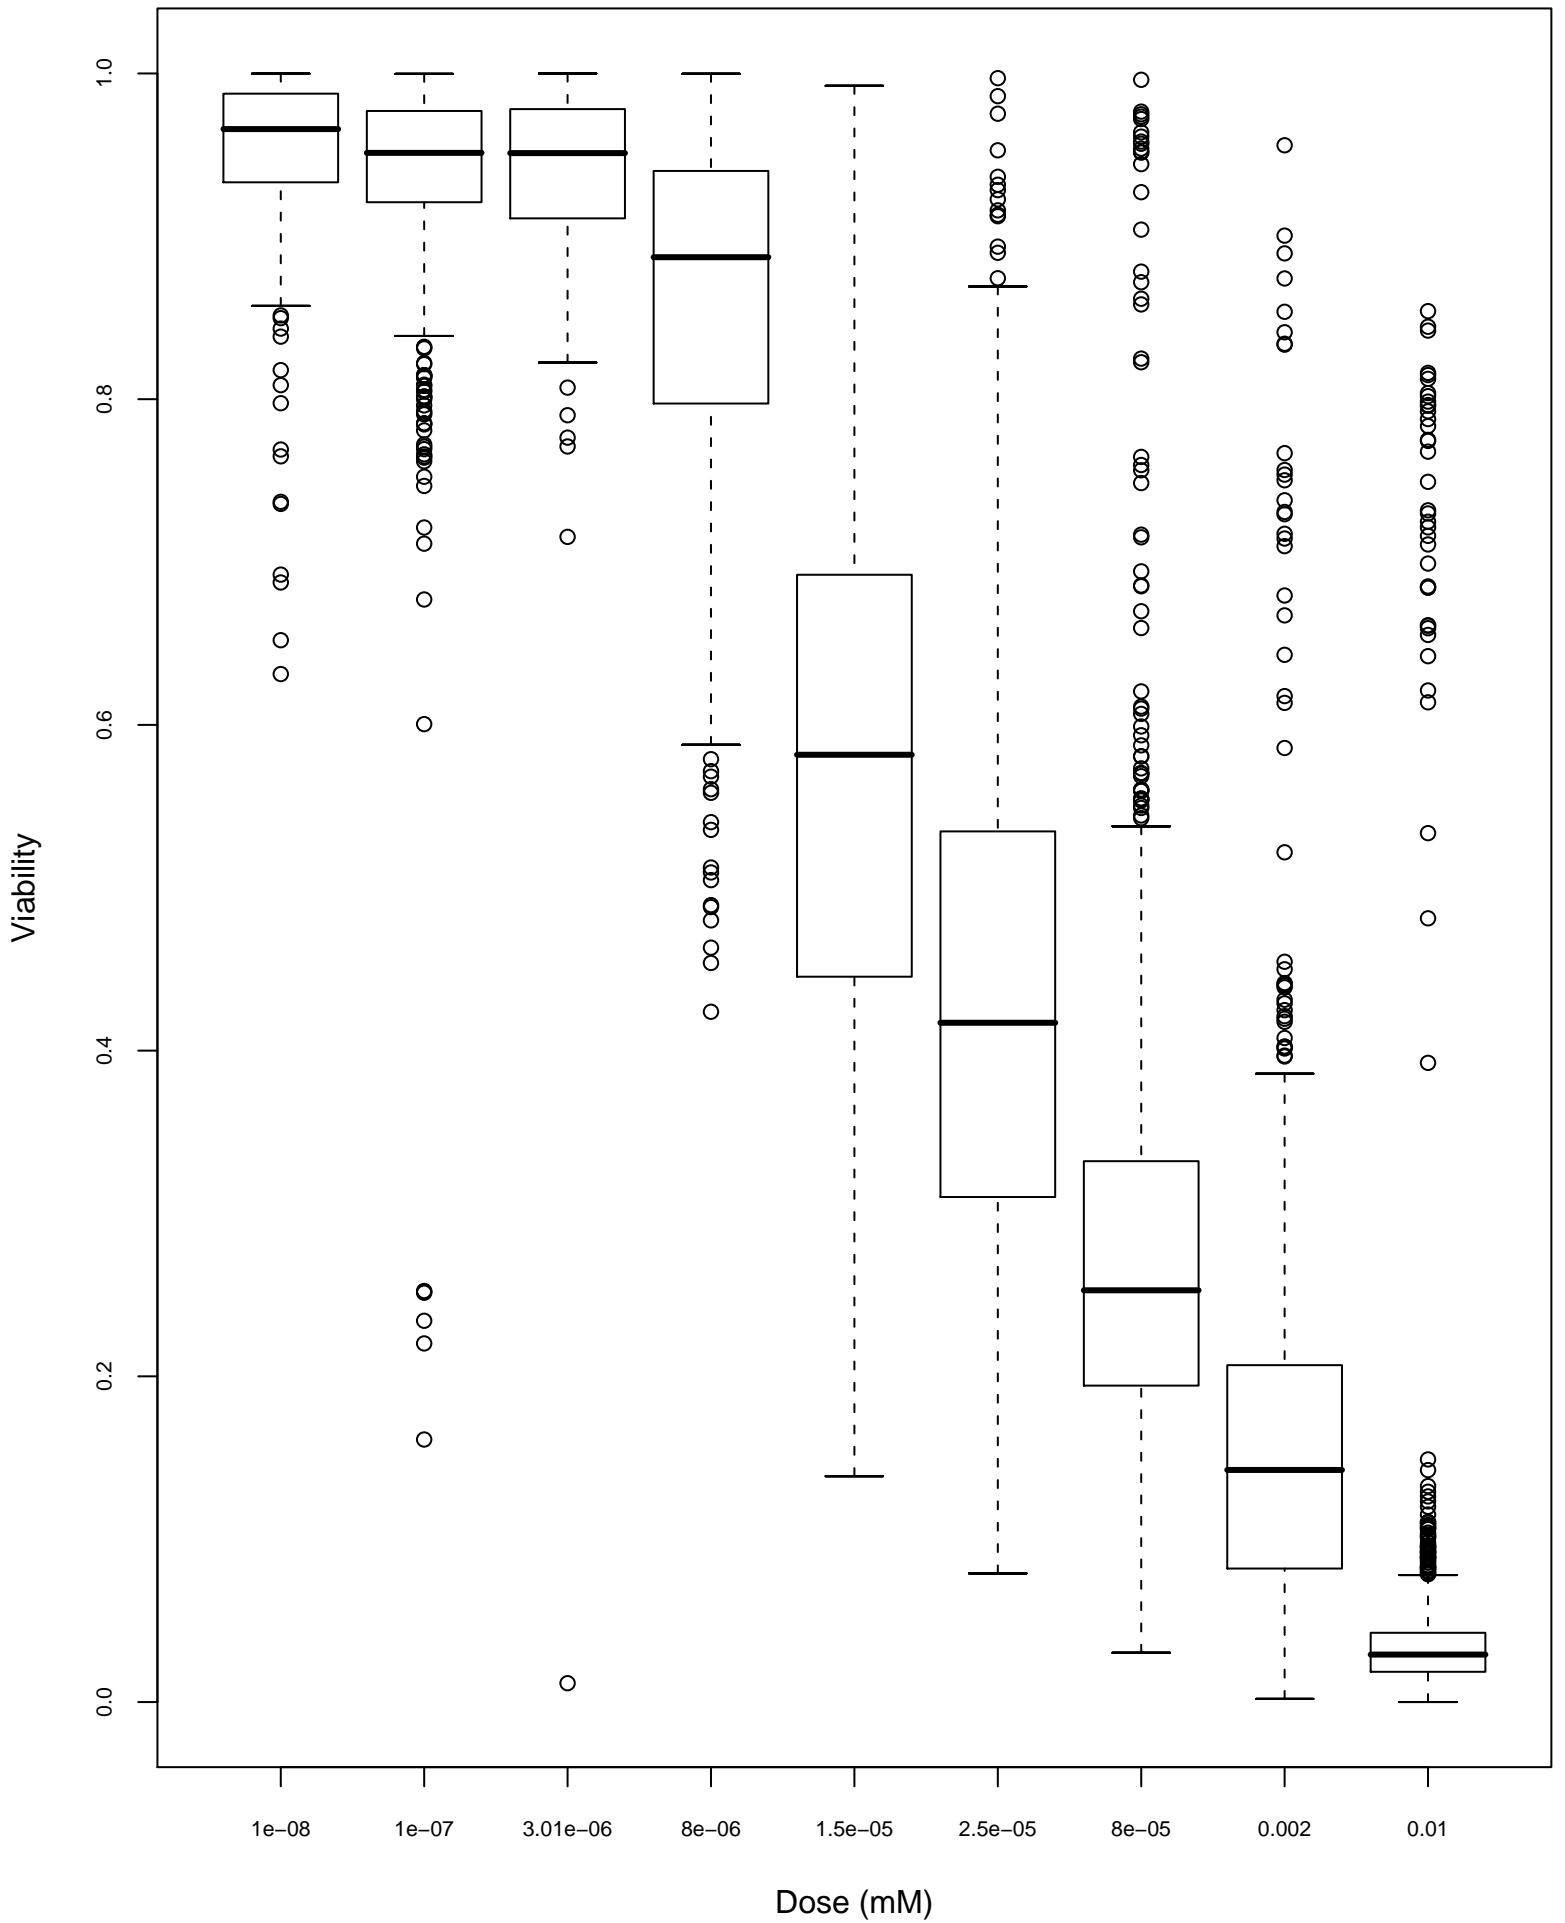

# Drug CICPT

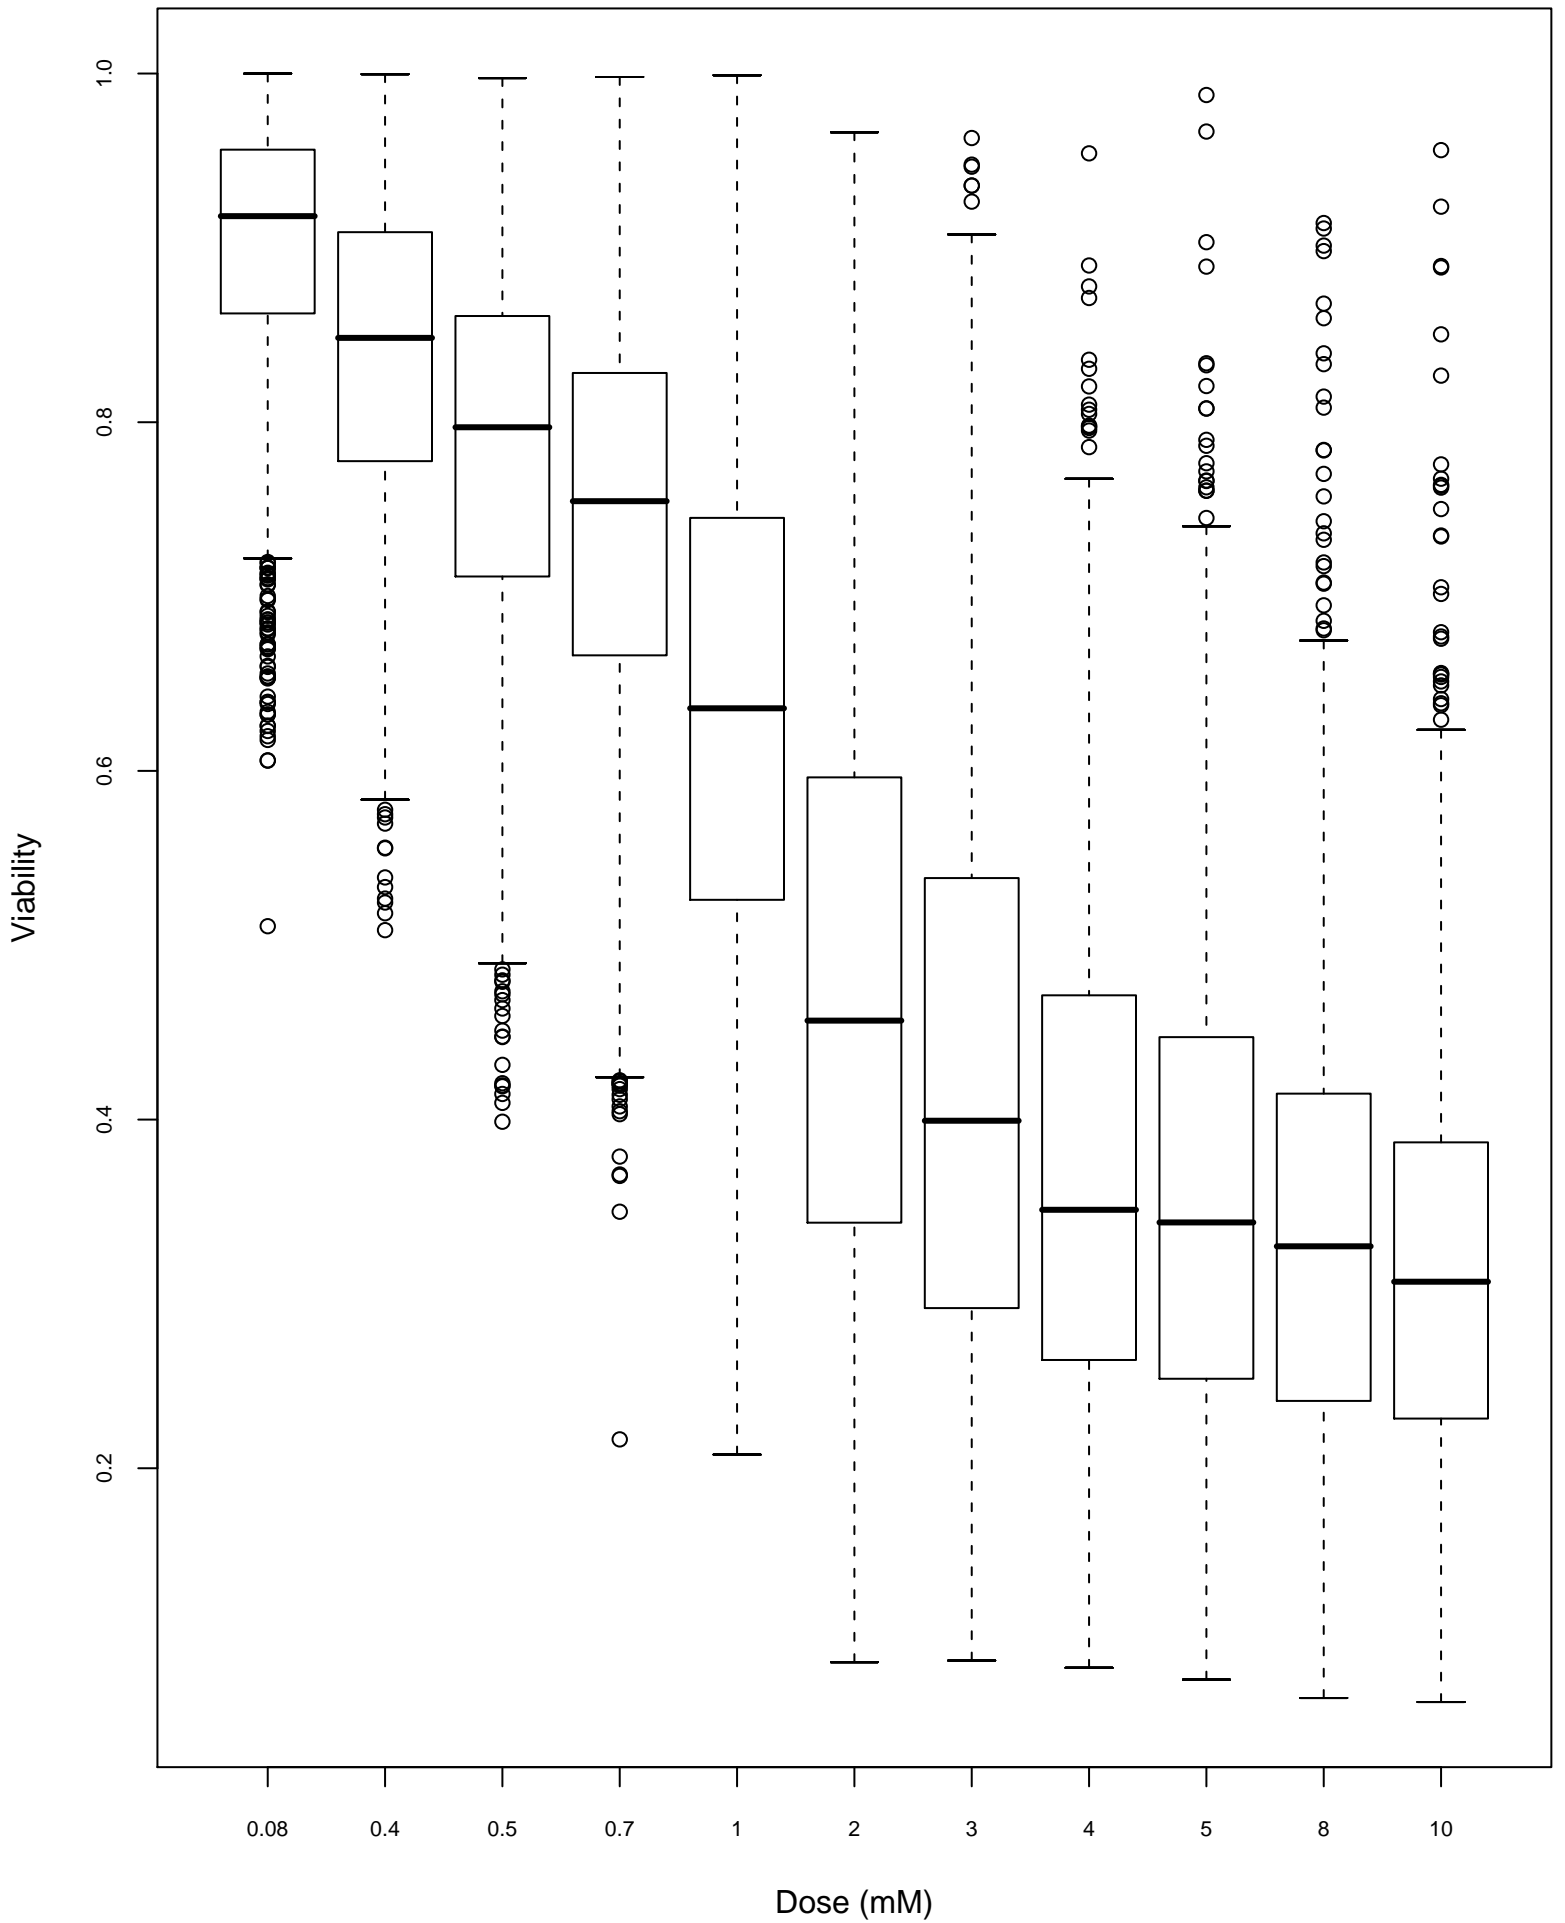

# Drug hCPT

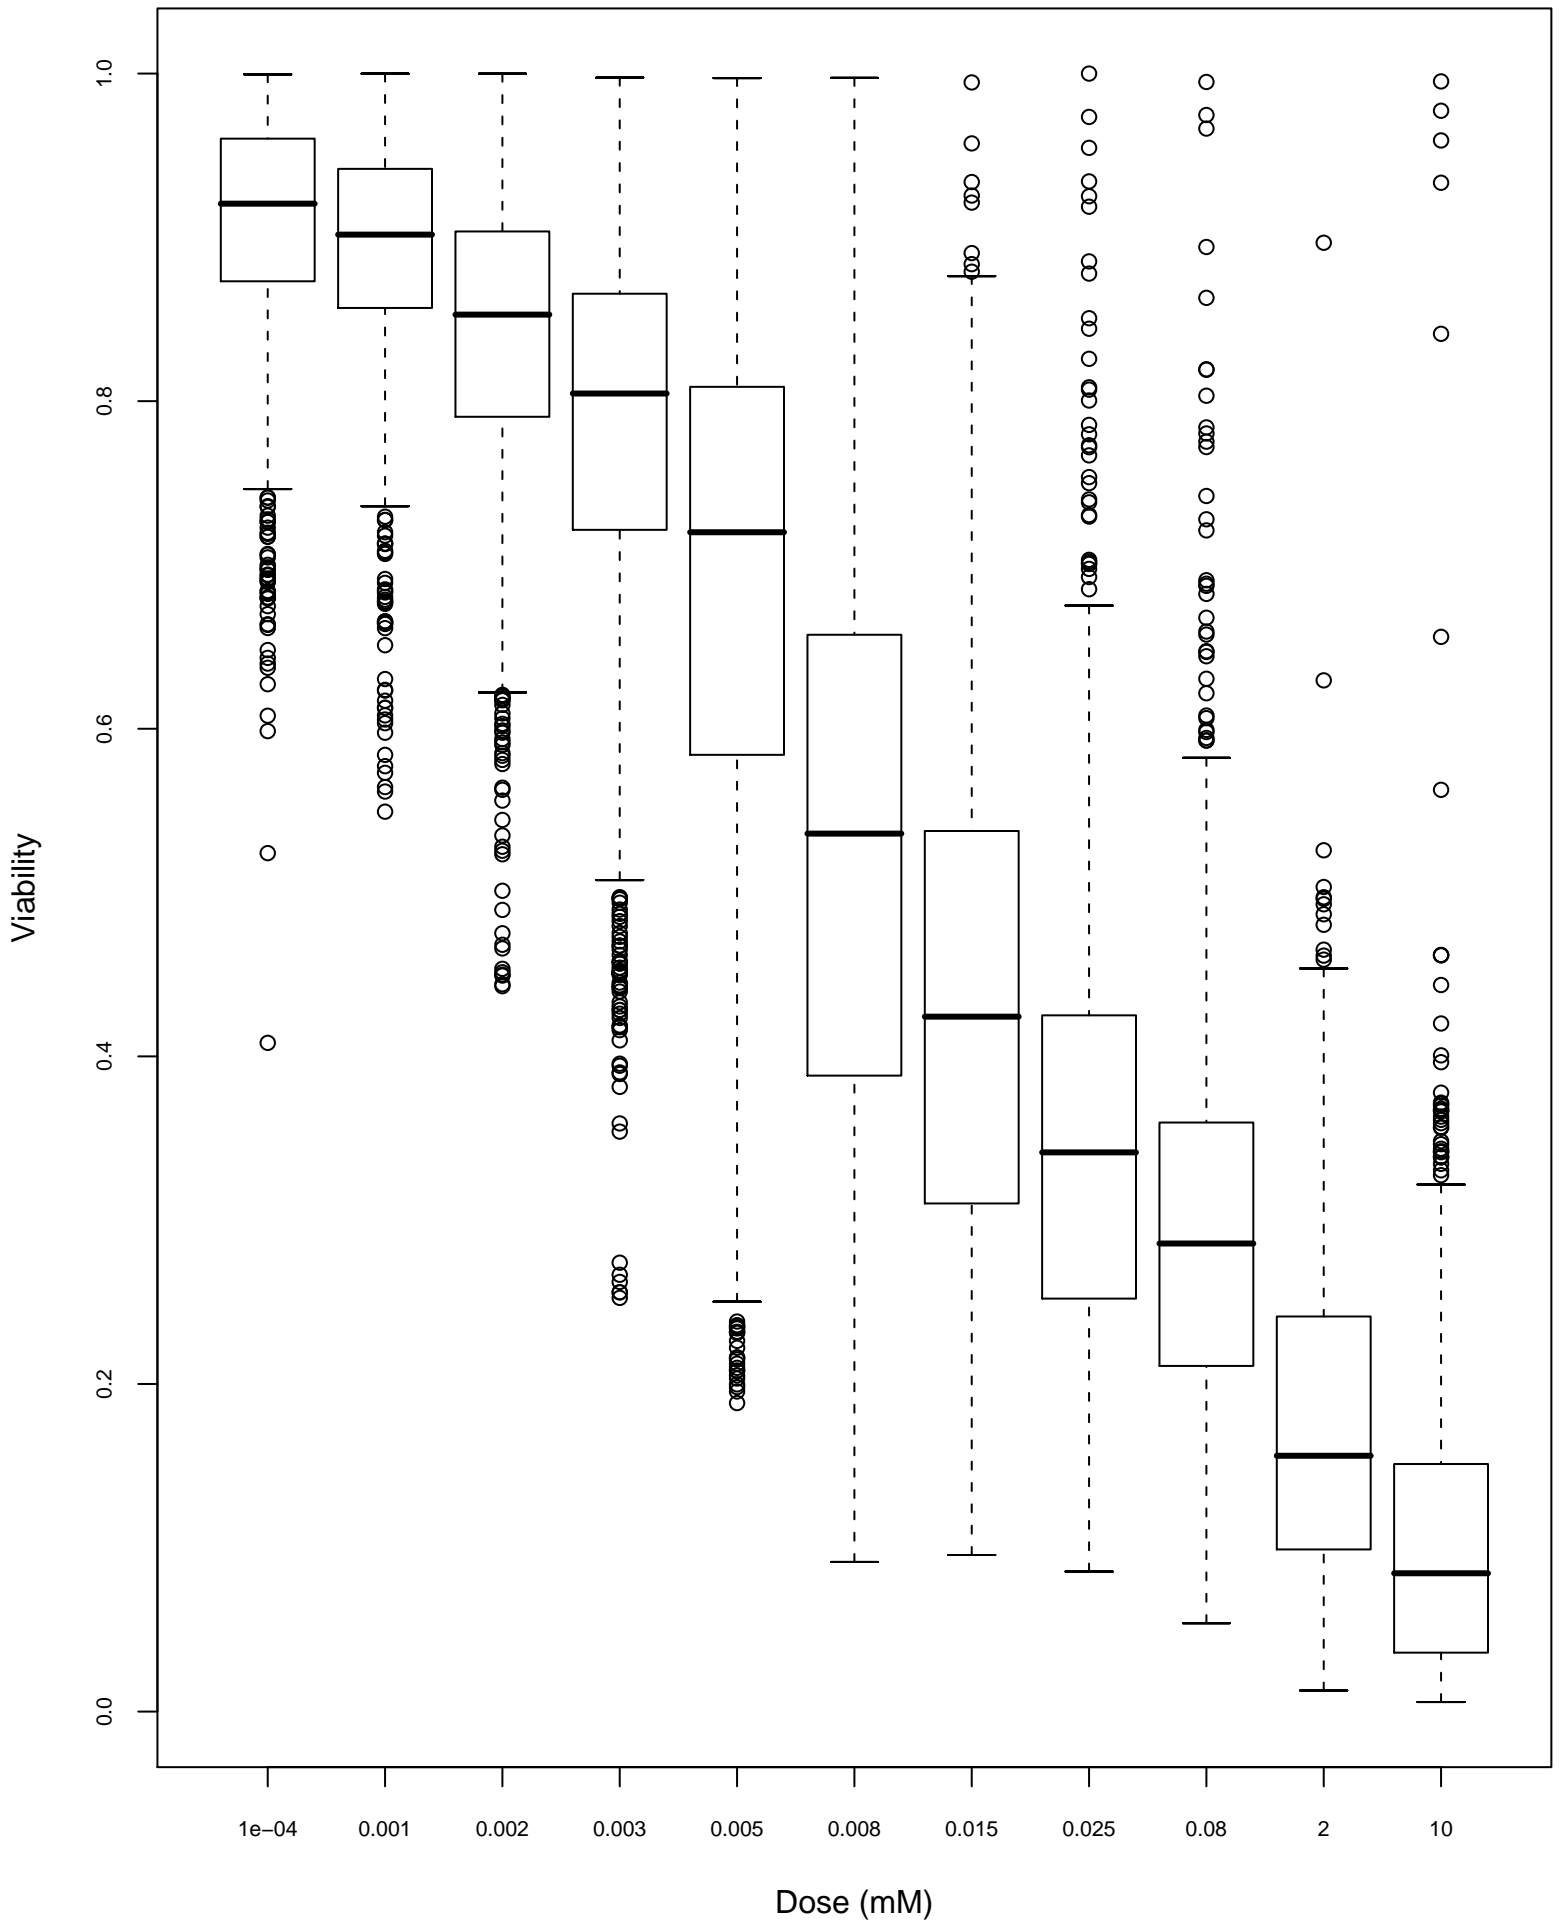



# Drug mCPT

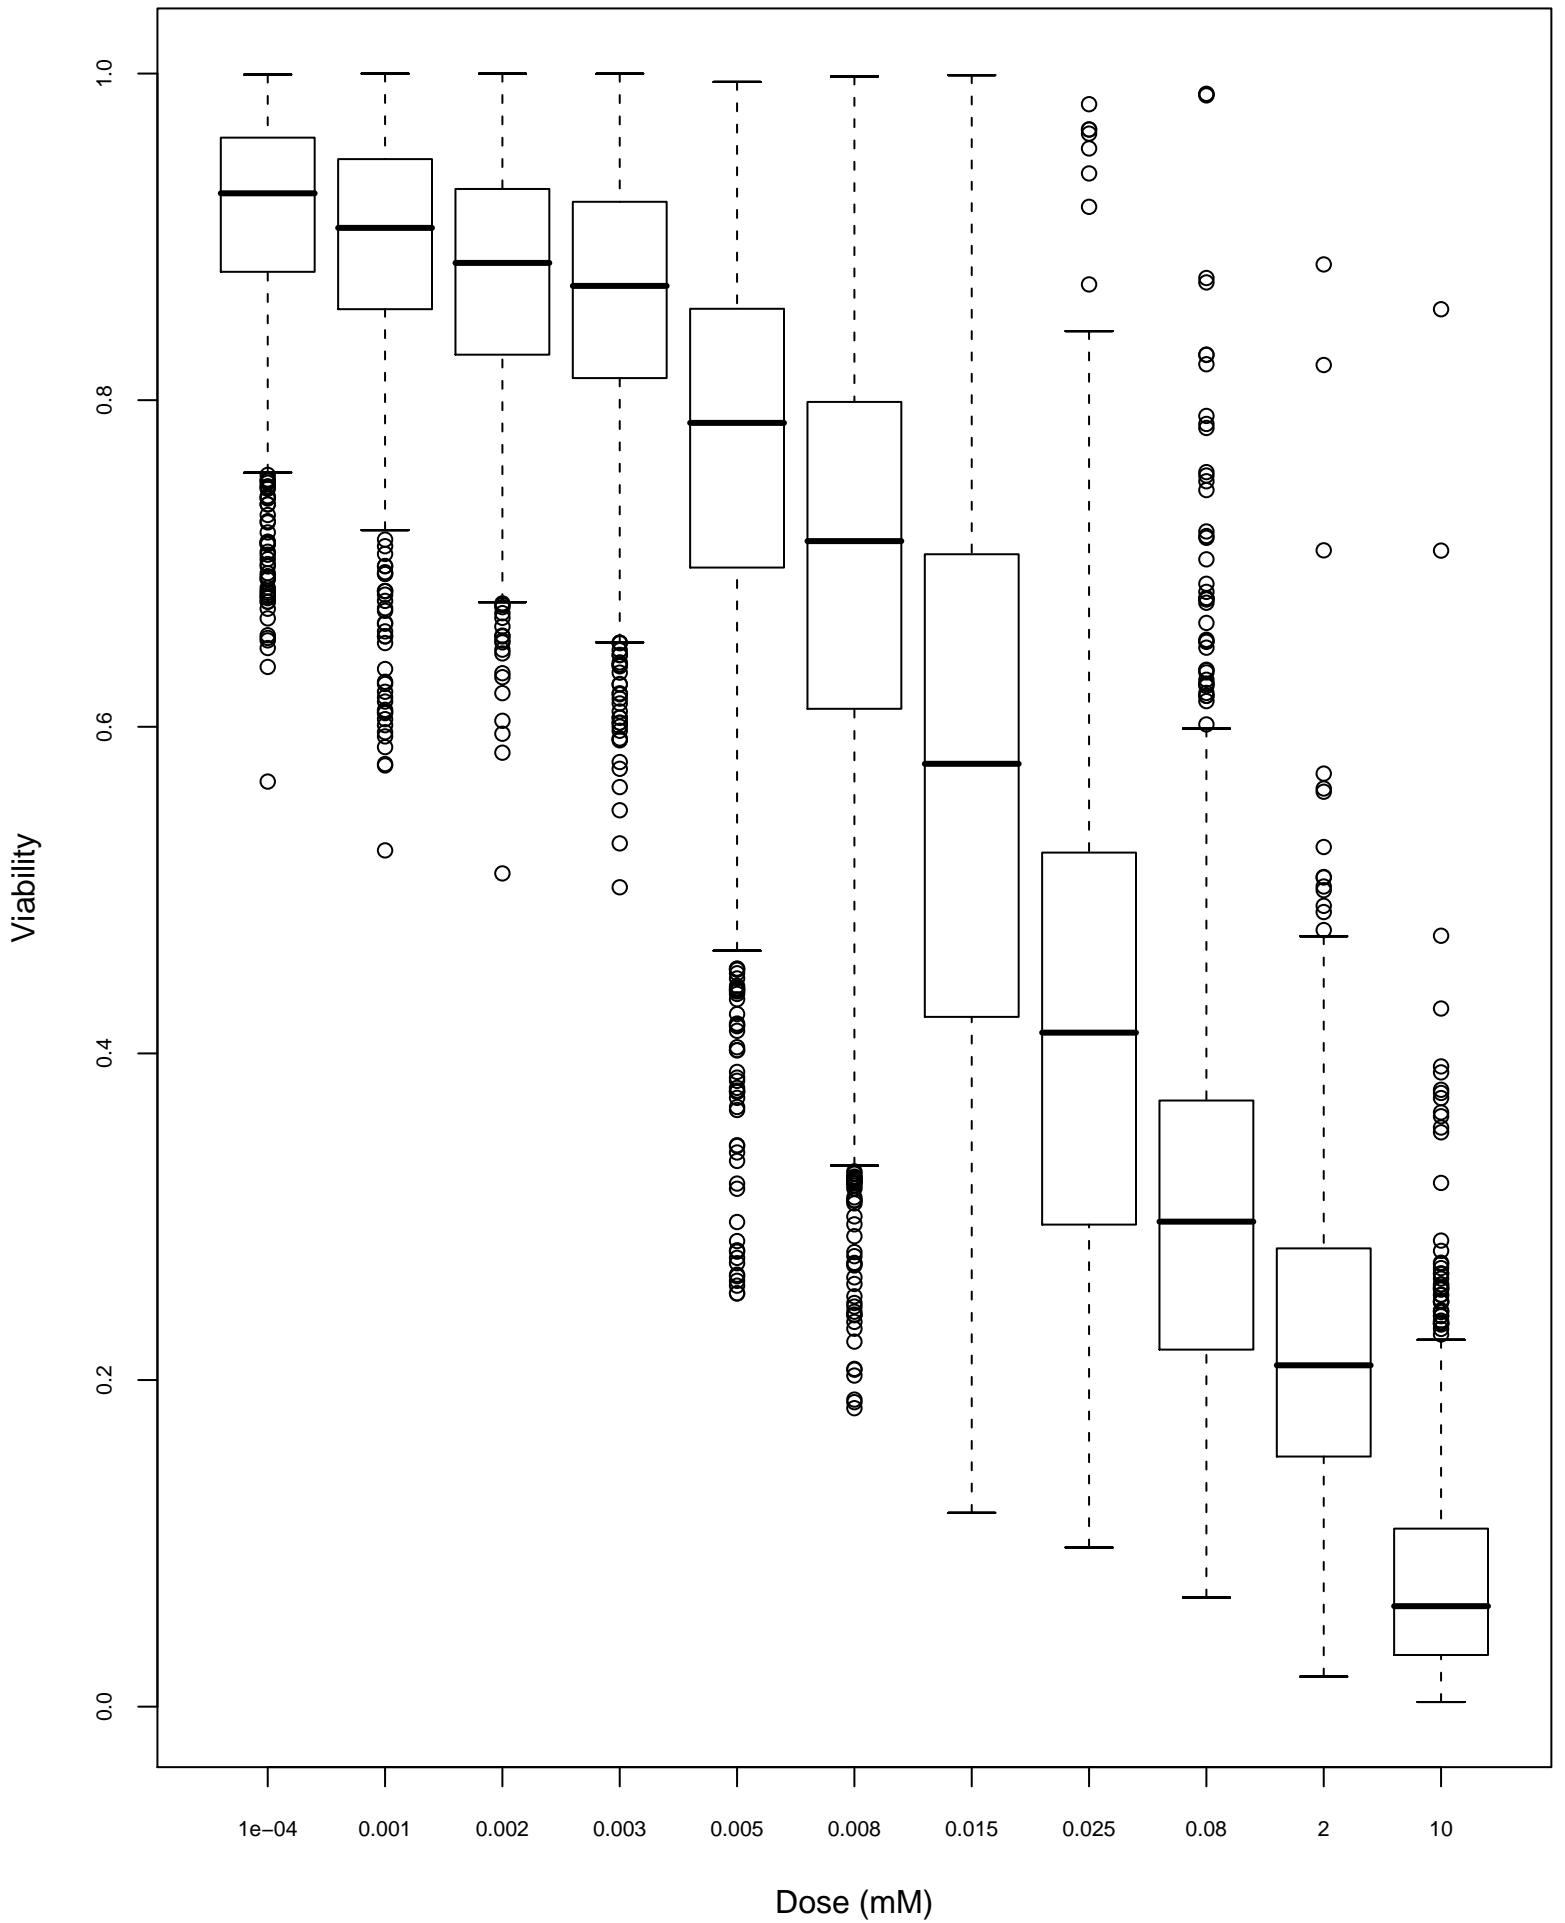

Supplement: pone.0017561.s009.pdf [file pone.0017561.s009.pdf]
